# Supplementary material
Source: PubMed Central journal article supplement (PMC1298918)
Supplement: nar_33_20_6494__1.pdf [file nar_33_20_6494__1.pdf]

**Supplementary materials to manuscript:  
“Gene identification in novel eukaryotic genomes by self-training algorithm”**

**Table S1**

***A. thaliana***

|    | number of exons | length aa | E-value | Domain name | Function                                                                                                         |
|----|-----------------|-----------|---------|-------------|------------------------------------------------------------------------------------------------------------------|
| 1  | 2               | 80        | -       | -           | -                                                                                                                |
| 2  | 1               | 81        | -       | -           | -                                                                                                                |
| 3  | 2               | 82        | -       | -           | -                                                                                                                |
| 4  | 1               | 92        | -       | -           | -                                                                                                                |
| 5  | 1               | 101       | -       | -           | -                                                                                                                |
| 6  | 1               | 115       | 0.001   | INT_Intl    | (E2) integrases, site-specific tyrosine recombinases, DNA breaking-rejoining enzymes, N- and C-terminal domains. |
| 7  | 1               | 219       | 2.0E-91 | CAT         | Chloramphenicol acetyltransferase.                                                                               |
| 8  | 1               | 219       | 2.0E-91 | CAT         | The same as #7.                                                                                                  |
| 9  | 1               | 385       | 0.003   | Soj         | Involved in chromosome partitioning and cell division                                                            |
| 10 | 14              | 616       | 0.009   | AsnB        | Asparagine synthase (glutamine-hydrolyzing), amino acid transport and metabolism.                                |

***A. gambiae***

|    | number of exons | length aa | E-value | Domain name   | Function                                                                                                                                                                                                         |
|----|-----------------|-----------|---------|---------------|------------------------------------------------------------------------------------------------------------------------------------------------------------------------------------------------------------------|
| 1  | 2               | 73        | 2.0E-16 | REX1          | DNA repair REX1 is required for DNA repair in yeast                                                                                                                                                              |
| 2  | 2               | 78        | 1.0E-15 | COX6C         | C oxidase subunit VIc cytochrome c oxidase, a 13 sub-unit complex, EC:1931 is the terminal oxidase in the mitochondrial electron transport chain.                                                                |
| 3  | 2               | 79        | -       | -             | -                                                                                                                                                                                                                |
| 4  | 3               | 79        | -       | -             | -                                                                                                                                                                                                                |
| 5  | 2               | 83        | 4.0E-04 | Complex1_LYR  | Complex 1 protein (LYR family). This family of short proteins includes proteins from the NADH-ubiquinone oxidoreductase complex I. The family includes the B14 subunit from cow, and the B22 subunit from human. |
| 6  | 2               | 88        | -       | -             | -                                                                                                                                                                                                                |
| 7  | 2               | 89        | 5.0E-08 | UPF0239       | Protein family UPF0239                                                                                                                                                                                           |
| 8  | 3               | 98        | -       | -             | -                                                                                                                                                                                                                |
| 9  | 4               | 102       | -       | -             | -                                                                                                                                                                                                                |
| 10 | 6               | 108       | -       | -             | -                                                                                                                                                                                                                |
| 11 | 2               | 108       | 6.0E-05 | CHCH          | Conserved motif in the LOC118487, CHCH motif.                                                                                                                                                                    |
| 12 | 1               | 115       | -       | -             | -                                                                                                                                                                                                                |
| 13 | 3               | 116       | 1.0E-13 | Ribosomal_L44 | Protein L44                                                                                                                                                                                                      |
| 14 | 1               | 128       | -       | -             | -                                                                                                                                                                                                                |
| 15 | 1               | 135       | -       | -             | -                                                                                                                                                                                                                |
| 16 | 2               | 141       | -       | -             | -                                                                                                                                                                                                                |
| 17 | 3               | 150       | -       | -             | -                                                                                                                                                                                                                |
| 18 | 2               | 159       | -       | -             | -                                                                                                                                                                                                                |
| 19 | 2               | 164       | -       | -             | -                                                                                                                                                                                                                |
| 20 | 3               | 178       | 1.0E-16 | DUF423        | With unknown function (DUF423). Potential integral membrane protein                                                                                                                                              |

|    |   |      |          |               |                                                                                                                                                                                                                  |
|----|---|------|----------|---------------|------------------------------------------------------------------------------------------------------------------------------------------------------------------------------------------------------------------|
| 21 | 3 | 201  | -        | -             | -                                                                                                                                                                                                                |
| 22 | 3 | 202  | 0.001    | MEA1          | Enhanced antigen 1 (MEA1). Consists of several mammalian male enhanced antigen 1 (MEA1) proteins.                                                                                                                |
| 23 | 1 | 204  | 0.005    | RimI          | With unknown function                                                                                                                                                                                            |
| 24 | 3 | 211  | -        | -             | -                                                                                                                                                                                                                |
| 25 | 4 | 222  | -        | -             | -                                                                                                                                                                                                                |
| 26 | 1 | 222  | 0.003    | RimI          | General function prediction only                                                                                                                                                                                 |
| 27 | 1 | 227  | 4.0E-04  | LITAF         | Membrane-associated motif in LPS-induced tumor necrosis factor alpha factor (LITAF), also known as PIG7                                                                                                          |
| 28 | 2 | 229  | 0.002    | Euk_Ferritin  | Ferritin (Euk_Ferritin) domain. Primary iron storage proteins.                                                                                                                                                   |
| 29 | 1 | 234  | 0.004    | COG4934       | Protease posttranslational modification, protein turnover, chaperones                                                                                                                                            |
| 30 | 1 | 264  | -        | -             | -                                                                                                                                                                                                                |
| 31 | 3 | 290  | -        | -             | -                                                                                                                                                                                                                |
| 32 | 4 | 324  | 2.0E-18  | Transposase_1 | This family includes the mariner transposase                                                                                                                                                                     |
| 33 | 1 | 326  | -        | -             | -                                                                                                                                                                                                                |
| 34 | 3 | 330  | 6.0E-15  | MRJP          | Royal jelly protein, responsible for the high reproductive ability of the queen. Also the sequence-related yellow protein of drosophila which controls pigmentation of the adult cuticle and larval mouth parts. |
| 35 | 2 | 355  | -        | -             | -                                                                                                                                                                                                                |
| 36 | 3 | 364  | 1.0E-38  | TAP42         | The TOR signaling pathway activates a cell-growth program in response to nutrients TIP41 (pfam04176) interacts with TAP42 and negatively regulates the TOR signaling pathway.                                    |
| 37 | 1 | 365  | -        | -             | -                                                                                                                                                                                                                |
| 38 | 4 | 373  | -        | -             | -                                                                                                                                                                                                                |
| 39 | 2 | 375  | -        | -             | -                                                                                                                                                                                                                |
| 40 | 1 | 390  | 4.0E-05  | PgsA          | Synthase lipid metabolism                                                                                                                                                                                        |
| 41 | 2 | 416  | -        | -             | -                                                                                                                                                                                                                |
| 42 | 1 | 454  | -        | -             | -                                                                                                                                                                                                                |
| 43 | 1 | 466  | -        | -             | -                                                                                                                                                                                                                |
| 44 | 1 | 470  | 4.0E-42  | COG5062       | Membrane protein. Function unknown                                                                                                                                                                               |
| 45 | 2 | 489  | -        | -             | -                                                                                                                                                                                                                |
| 46 | 3 | 496  | 0.003    | Amino_oxidase | Containing amine oxidoreductase. This family consists of various amine oxidases, including maze polyamine oxidase (PAO) and various flavin containing monoamine oxidases (MAO)                                   |
| 47 | 1 | 527  | -        | -             | -                                                                                                                                                                                                                |
| 48 | 1 | 555  | -        | -             | -                                                                                                                                                                                                                |
| 49 | 2 | 583  | 7.0E-19  | EGL-9         | Proline hydroxylase. Posttranslational modification, protein turnover, chaperones                                                                                                                                |
| 50 | 1 | 698  | -        | -             | -                                                                                                                                                                                                                |
| 51 | 3 | 727  | -        | -             | -                                                                                                                                                                                                                |
| 52 | 1 | 733  | 0        | Neurochondrin | This family contains several eukaryotic neurochondrin proteins.                                                                                                                                                  |
| 53 | 4 | 741  | 0.001    | FHA           | Associated domain (FHA); found in eukaryotic and prokaryotic proteins                                                                                                                                            |
| 54 | 1 | 875  | 1.0E-143 | Nup84_Nup100  | Pore protein 84 / 107 Nup84p                                                                                                                                                                                     |
| 55 | 8 | 1062 | 0.004    | CA            | Repeat domain; involved in Ca <sup>2+</sup> -mediated cell-cell adhesion; plays a role in cell fate, signalling, proliferation, differentiation, and migration                                                   |

### ***C. elegans***

|  | number of | length aa | E-value | Domain name | Function |
|--|-----------|-----------|---------|-------------|----------|
|--|-----------|-----------|---------|-------------|----------|

|    | exons |     |          |                |                                                                                                                                                                               |
|----|-------|-----|----------|----------------|-------------------------------------------------------------------------------------------------------------------------------------------------------------------------------|
| 1  | 2     | 90  | -        | -              | -                                                                                                                                                                             |
| 2  | 2     | 91  | -        | -              | -                                                                                                                                                                             |
| 3  | 2     | 92  | -        | -              | -                                                                                                                                                                             |
| 4  | 2     | 94  | -        | -              | -                                                                                                                                                                             |
| 5  | 3     | 97  | -        | -              | -                                                                                                                                                                             |
| 6  | 2     | 99  | -        | -              | -                                                                                                                                                                             |
| 7  | 1     | 101 | -        | -              | -                                                                                                                                                                             |
| 8  | 2     | 102 | 0.009    | SapB           | Saposin (B) domain. Present in multiple copies in prosaposin and in pulmonary surfactant-associated protein B.                                                                |
| 9  | 3     | 112 | 3.00E-04 | SapB           | The same as #8.                                                                                                                                                               |
| 10 | 2     | 112 | -        | -              | -                                                                                                                                                                             |
| 11 | 4     | 112 | -        | -              | -                                                                                                                                                                             |
| 12 | 3     | 114 | -        | -              | -                                                                                                                                                                             |
| 13 | 2     | 119 | -        | -              | -                                                                                                                                                                             |
| 14 | 3     | 126 | -        | -              | -                                                                                                                                                                             |
| 15 | 3     | 130 | -        | -              | -                                                                                                                                                                             |
| 16 | 5     | 132 | -        | -              | -                                                                                                                                                                             |
| 17 | 3     | 135 | -        | -              | -                                                                                                                                                                             |
| 18 | 3     | 137 | 2.0E-07  | TRS20          | Subunit of TRAPP, an ER-Golgi tethering complex. Cell motility and secretion.                                                                                                 |
| 19 | 2     | 139 | 1.0E-04  | DUF290         | Transthyretin-like family. This family has weak similarity to transthyretin (formerly called prealbumin) which transports thyroid hormones.                                   |
| 20 | 2     | 140 | -        | -              | -                                                                                                                                                                             |
| 21 | 2     | 141 | -        | -              | -                                                                                                                                                                             |
| 22 | 2     | 142 | 0.003    | DIM1           | Mitosis protein DIM1.                                                                                                                                                         |
| 23 | 2     | 143 | -        | -              | -                                                                                                                                                                             |
| 24 | 2     | 145 | -        | -              | -                                                                                                                                                                             |
| 25 | 2     | 152 | -        | -              | -                                                                                                                                                                             |
| 26 | 4     | 154 | -        | -              | -                                                                                                                                                                             |
| 27 | 4     | 157 | -        | -              | -                                                                                                                                                                             |
| 28 | 3     | 160 | -        | -              | -                                                                                                                                                                             |
| 29 | 6     | 172 | -        | -              | -                                                                                                                                                                             |
| 30 | 4     | 180 | -        | -              | -                                                                                                                                                                             |
| 31 | 3     | 184 | -        | -              | -                                                                                                                                                                             |
| 32 | 5     | 185 | -        | -              | -                                                                                                                                                                             |
| 33 | 4     | 222 | -        | -              | -                                                                                                                                                                             |
| 34 | 4     | 224 | -        | -              | -                                                                                                                                                                             |
| 35 | 6     | 229 | -        | -              | -                                                                                                                                                                             |
| 36 | 4     | 238 | -        | -              | -                                                                                                                                                                             |
| 37 | 5     | 265 | -        | -              | -                                                                                                                                                                             |
| 38 | 5     | 273 | -        | -              | -                                                                                                                                                                             |
| 39 | 4     | 302 | -        | -              | -                                                                                                                                                                             |
| 40 | 4     | 308 | -        | -              | -                                                                                                                                                                             |
| 41 | 7     | 340 | -        | -              | -                                                                                                                                                                             |
| 42 | 1     | 402 | 2.0E-08  | Transposase_11 | Transposase DDE domain. Member of the DDE superfamily, which contains three carboxylate residues believed to be responsible for coordinating metal ions needed for catalysis. |
| 43 | 1     | 402 | 2.0E-08  | Transposase_11 | The same as #42                                                                                                                                                               |
| 44 | 9     | 578 | 0.008    | RasGAP         | GTPase-activator protein for Ras-like GTPases.                                                                                                                                |
| 45 | 3     | 184 | 3.0E-94  | -              | TetC [Shigella flexneri], tetracycline resistance protein C in [Plasmid R100]                                                                                                 |

### ***C. intestinalis***

|    | number of exons | length aa | E-value  | Domain name              | Function                                                                                                                     |
|----|-----------------|-----------|----------|--------------------------|------------------------------------------------------------------------------------------------------------------------------|
| 1  | 2               | 68        | 2.0E-07  | GGL                      | involved in signal transduction via G-protein-coupled receptors                                                              |
| 2  | 2               | 83        | 3.0E-14  | zf-CSL                   | CSL zinc finger. The function is uncertain                                                                                   |
| 3  | 2               | 100       | -        | -                        | -                                                                                                                            |
| 4  | 1               | 102       | 5.0E-24  | Chaperonin 10 Kd subunit | Involved in protein folding, ATP binding                                                                                     |
| 5  | 1               | 112       | -        | -                        | -                                                                                                                            |
| 6  | 1               | 131       | -        | -                        | -                                                                                                                            |
| 7  | 3               | 131       | 2.0E-08  | MAPEG family             | Membrane associated proteins in eicosanoid and glutathione metabolism, catalyses the synthesis of PGE2 from PGH3             |
| 8  | 1               | 139       | -        | -                        | -                                                                                                                            |
| 9  | 3               | 151       | -        | -                        | -                                                                                                                            |
| 10 | 3               | 152       | 6.0E-13  | MAPEG family             | The same as #7                                                                                                               |
| 11 | 1               | 167       | -        | -                        | -                                                                                                                            |
| 12 | 3               | 184       | -        | -                        | -                                                                                                                            |
| 13 | 1               | 231       | 4.0E-61  | PCMT                     | protein-L-isoaspartate (D-aspartate) O-methyltransferase activity                                                            |
| 14 | 1               | 234       | -        | -                        | -                                                                                                                            |
| 15 | 5               | 244       | 5.0E-09  | L10                      | Ribosomal protein                                                                                                            |
| 16 | 3               | 249       | 2.0E-07  | MIT                      | Microtubule interacting and trafficking molecule domain                                                                      |
| 17 | 1               | 253       | -        | -                        | -                                                                                                                            |
| 18 | 1               | 286       | 0.009    | RplO                     | Ribosomal protein L15 [Translation, ribosomal structure and biogenesis]                                                      |
| 19 | 12              | 304       | -        | -                        | -                                                                                                                            |
| 20 | 3               | 319       | 8.0E-60  | Per1                     | A member of this family has been implemented in protein processing in the endoplasmic reticulum                              |
| 21 | 5               | 357       | -        | -                        | -                                                                                                                            |
| 22 | 9               | 397       | -        | -                        | -                                                                                                                            |
| 23 | 1               | 407       | 3.0E-26  | RNA_pol_I_A49            | A49-like RNA polymerase I associated factor. Involved in transcription of ribosomal DNA                                      |
| 24 | 13              | 424       | -        | -                        | -                                                                                                                            |
| 25 | 5               | 483       | 3.0E-06  | PTB                      | Phosphotyrosine-binding (PTB) domain                                                                                         |
| 26 | 1               | 517       | 3.0E-10  | CAP_ED                   | Effector domain of the CAP family of transcription factors                                                                   |
| 27 | 2               | 764       | 2.0E-158 | eIF3c_N                  | Eukaryotic translation initiation factor 3 subunit 8 N-terminus. The largest of the mammalian translation initiation factors |

### ***C. reinhardtii***

|   | number of exons | length aa | E-value | Domain name                    | Function                                                                                                                                                                                |
|---|-----------------|-----------|---------|--------------------------------|-----------------------------------------------------------------------------------------------------------------------------------------------------------------------------------------|
| 1 | 3               | 56        | 3.0E-07 | Ribosomal_S21e                 | Translation, ribosomal structure and biogenesis                                                                                                                                         |
| 2 | 2               | 64        | 1.0E-07 | Nop10p                         | Nucleolar RNA-binding protein, Nop10p family. Essential for 18S rRNA production and rRNA pseudouridylation by the ribonucleoprotein particles containing H/ACA snoRNAs (H/ACA snoRNPs). |
| 3 | 3               | 89        | 7.0E-15 | CSL zinc finger                | Unknown function                                                                                                                                                                        |
| 4 | 4               | 92        | 2.0E-08 | Sec61beta family               | Component of the Sec61/SecYEG protein secretory system                                                                                                                                  |
| 5 | 4               | 101       | 5.0E-04 | Uncharacterized protein family | Unknown function                                                                                                                                                                        |

|    |   |     |         |                          |                                                                                                                                                                    |
|----|---|-----|---------|--------------------------|--------------------------------------------------------------------------------------------------------------------------------------------------------------------|
| 6  | 3 | 103 | 3.0E-17 | ribosomal protein S21    | Small ribosomal subunit                                                                                                                                            |
| 7  | 3 | 110 | 2.0E-18 | SRP9                     | Signal recognition particle 9 kDa protein. Pausing of synthesis of ribosome associated nascent polypeptides that have been engaged by the targeting domain of SRP. |
| 8  | 1 | 129 | 8.0E-07 | ACN9 family              | Localized to the mitochondrial intermembrane space may be a necessary general component of gluconeogenesis                                                         |
| 9  | 3 | 130 | 1.0E-13 | SCP2                     | SCP-2 sterol transfer family. Involved in binding sterols                                                                                                          |
| 10 | 5 | 134 | 7.0E-33 | Ribosomal protein S9/S16 | Ribosomal subunit                                                                                                                                                  |
| 11 | 5 | 137 | -       | -                        | -                                                                                                                                                                  |
| 12 | 3 | 162 | 0.002   | SAP                      | Predicted to be involved in chromosomal organization                                                                                                               |
| 13 | 4 | 236 | 7.0E-05 | U1-like zinc finger      | Zinc ion binding, nucleic acid binding                                                                                                                             |

### ***D. melanogaster***

|   | number of exons | length aa | E-value | Domain name     | Function                                                                                                                                                                                                         |
|---|-----------------|-----------|---------|-----------------|------------------------------------------------------------------------------------------------------------------------------------------------------------------------------------------------------------------|
| 1 | 1               | 73        | 5.0E-17 | REX1            | DNA Repair. REX1 is required for DNA repair in yeast, and has homologues in other eukaryotes.                                                                                                                    |
| 2 | 1               | 94        | -       | -               | -                                                                                                                                                                                                                |
| 3 | 1               | 101       | -       | -               | -                                                                                                                                                                                                                |
| 4 | 2               | 103       | -       | -               | -                                                                                                                                                                                                                |
| 5 | 1               | 111       | -       | -               | -                                                                                                                                                                                                                |
| 6 | 3               | 127       | -       | -               | -                                                                                                                                                                                                                |
| 7 | 4               | 137       | 4.0E-05 | Complex1_LYR    | Complex 1 protein (LYR family). This family of short proteins includes proteins from the NADH-ubiquinone oxidoreductase complex I. The family includes the B14 subunit from cow, and the B22 subunit from human. |
| 8 | 3               | 144       | -       | -               | -                                                                                                                                                                                                                |
| 9 | 1               | 150       | 5.0E-09 | Complex1_17_2kD | NADH:ubiquinone oxidoreductase 17.2 kD subunit. This family contains the 17.2 kD subunit of complex I and its homologues.                                                                                        |
