# Supplementary material
Source: PubMed Central journal article supplement (PMC1298918)
Supplement: nar_33_20_6494__2.pdf [file nar_33_20_6494__2.pdf]

**Supplementary materials to manuscript:  
“Gene identification in novel eukaryotic genomes by self-training algorithm”**

**File S2**

```
LOCUS           1           1343 bp           DNA           linear PLN 25-FEB-2004
ACCESSION       1
VERSION         GeneMark.hmm v3.0 self_training
ORGANISM        A.thaliana
FEATURES        CHR ---
CDS             join(500..670,772..843)
                /translation="MGRKAGNLYINPKKLGNLAKPCMKEVMSFLNCMALNNIKDDKC
                EKQKQLLSVCMQGSQSDHKNKSWGNIYHLQRLTRGRK"

ORIGIN
  1 TTTCTCTCGT CTCGTCGTCT CTCAGAAATC TTTGTAAGTG CTTGTTCCG CATTCTCTC
 61 TGATTAGATT TTGTGTTTGT TCGTTTTGCT TCGATTCTGC GATTTTTGAT TTGCCCAATT
121 AGATTCGATT TCGTTCTATG TTCGGATCTG AGACCATTGG TATGTTTAAT TCTTCTTTGA
181 TTTTGGCTTT GATGTTGATT CCGATCTTGG GTCTTTAAGT GTGTTTCATCA TTTGTTTTAT
241 CTTCTCATAT GGTTTCTACA AACTTCTCAA CGTCATAGAA ATGTATAATT GTTAGTGTTC
301 CGTGGGTTAA TCTCAATGTT CTTACTTTCT CTTGTTGTTT AAAGGCCTAG GATTGAATCT
361 GTCGACGAAA ATGTGATATA TGAGTGTATT CAGGGTAAGG GTAGCTTTGT GGGAAACTTG
421 ATATGATGCT GCAGATTTGA TTTACTACTG TTTTTTTTTT TTATGGTTTC TGTTTCTTTA
481 GTTAGTTGAG AGAGCTATAA TGGGGAGAAA GGCTGGAAAT TTGTACATAA ACCCGAAAAA
541 GCTCGGGAAT TTGGCGAAAC CGTGTATGAA GGAAATGGTA TCGTTCCTGA ACTGTATGGC
601 TCTTAACAAT ATCAAAGATG ATAAATGTGA GAAACAGAAG CAACTCCTGA GTGTTTGTAT
661 GCAAGGCCAG GTTAATATCT TTGCATTTTG CTTACTGCGT TTATACTTTT ATTCGTCACT
721 GCCTTTTTCG AAAACGATGA ACTTTGTTTT GTTTTCTTGC TTGCTTTGCA GTCGGATCAT
781 AAGAACAAGT CTTGGGGTAA CATTAACTAC CATTTCGAGA GGCTAACCCG TGGAAGAAAG
841 TAATCGAAAG CAATGGGATC TTGTTATCCA TAGACCGATA GATGAATCCG TTGTTTCGATC
901 TTGTCATTTG TCTCTGTGTT CTTTGAGGTA TGTAGAAGAA GAACTTTGGA CACATTGTTC
961 ATCGAGAGAA AGGATTATTG GTCTCTTTGT TTTGCAATAA ACATGTCTTC TGAGTCAAGG
1021 GTCAGGCAGA AGATCCATTA GTATTAATGA TGATGTGCTT AGTCTAGTTT AAATTAGAAA
1081 TGATATGTAC CAAATTGCAA TTA AACATT GATTATTAGA AA ACTTGAAG CTACAATAAG
1141 ATTTAAGTTG TAATTTTTTT TTTTTTCTC AACTTAAATT AGGGTTAGTA GTGTCTTTAA
1201 ATTACATGTT AGCATTACTG GAAAAAAGTC TTAATACAAA TAAGAGTTTC AATAAGGTAC
1261 AAGTGAATGC AACAGAACTG TTTACATATT TTTTCTTCA TAAACATTTA TGCATATTCT
1321 TGAGATAAAT GTTTACTAAA AAA
```

//

```
LOCUS           2           1318 bp           DNA           linear PLN 25-FEB-2004
ACCESSION       2
VERSION         GeneMark.hmm v3.0 self_training
ORGANISM        A.thaliana
FEATURES        CHR ---
CDS             complement(join(500..553,627..818))
                /translation="MKKVLRVYGGVMRLVRLLPADSRPYYAKYARENFVNYREVDQS
                ETSLDELFFQRAYNHSLWVLKKYSIDESAAATKLKEICFE"

ORIGIN
  1 CAAAAACAAT CTCAAAAAGA CTTTGGTTTT GGTTAGGTTG GTTTCATATA AGATTTTCGA
 61 GTTTTTCGACA AGGACCTAAA CTCTTAGCTA CTGTTTATTG TCCCTTAGCT ACATATATAT
121 CACTTTAATT ACCCAAACAA TCCCTAATCT TTCTCTCTCG TTATTACTTA ACTGCCACTT
181 CTACTTTGCT CTGATGAGTT TCTTTCATTA CCAAAGATGA GATTAAGTAA TGTGATGTTT
241 TCGAATCTAA GAATGTAACA ATTTTATTCA GGATCATGGA AACAAACAAG AAGCTAGCTA
301 CTCAAACAAG ACAACGACCA ATTCAGCAGT CAATCACAGA AAGTCAAGAC AACTAAAAAG
361 GAAAGACAAA GACACATGAA CAACCCCTGT TCTTGATATA GCTATCAAAA GTAGAAAAT
```

```

421 GATGGTACCC ATTTAACAAA TCGTCCAAAC TTGTTCCAAC ACTCTCAGGG ACATAACGTC
481 GAACACTTGG TGTGCGTTAT TATTCAAAAC AAATCTCTTT CAACTTCGTC GCTGCTGATT
541 CGTCAATTGA GTACTGCAAA TGATTGAGAA CAGACAGTTA ACACAAAGGG TACCTAGATT
601 TAAAAGAAAC CCAGAATCTT TGTTACCTTC TTGAGTACCC AAAGTGAGTG ATTATAGGCT
661 CGCTGGAAGA GTTCGTCGAG GGATGTTTCG CTTTGATCGA CTTACCGGTA ATTAACGAAA
721 TTCTCCCTGG CGTACTTGGC GTAATACGGC CTTGAATCCG CCGGCAAAAG TCTCACCAGC
781 CTCATAACGC CGCCGTATAC TCTCAGCACC TTCTTCATTT TCGTTTACCT TCTGCAACAC
841 GTTACCCAAT TCTAGGACTC TAATACTGTA TCATAAACAT CCATGGGCTC TTAATGGGCC
901 TTTAATAATA AGCAATTACA GACCGGTTAA ACGTTACAT TTGAGGGTTT AAAACCGGTT
961 CAAACAAGAC TTTTAAAGTT TAAATCTCTT GATCTCTTAA ACCGGTCTCT ATCGATTACA
1021 GAAACAATAA CTCAAAAACAT CTCTCCAGAT GGAAATAAAC AAAAACCCTT ATAATATAA
1081 CACAAAGCCT TAACCTCTTT AACTGTTAAA AATGAACCTA TCATCCAATT TCGAAGAAAA
1141 TCTTTCTTTC TTTCTTTTGC CTCAAATTTT AAGGTCTTCA AAGTACCCCA AAAATGTGAA
1201 ACAAAGAACT GAACAAACCC GATGCTTTGC AGGGTTTGGT GTCTTCATAT CTCGGGGTTT
1261 GGGTAAGTAT GTGTTCCAGT ATTGTCCTTG CATTAGATCT AAAACCTTCA TGATTGAA

```

//

```

LOCUS          3      1389 bp      DNA      linear PLN 25-FEB-2004
ACCESSION     3
VERSION       GeneMark.hmm v3.0 self_training
ORGANISM      A.thaliana
FEATURES
  CDS          CHR ---
              join(500..563,705..889)
              /translation="MAKIKSLDVITVAIILLLLVIADQATAITVQADCIGPCNDDCQQ
              LCKSKGYTDWTCASFRTKSSCCCKPPRHQIFEQNAQLNN"
ORIGIN

```

```

1 TATCTCTATT AATTAATATT ACATATAGTG AAGTATCATT ACTTTTATTT TTATCACCTA
61 AAAGGCCATA ACTTAATTAT ATGGTATGAA ATTTTATCTT TATTAATACT TTTGATATTT
121 TGAAACAAAA ATAAAATAAA TATGGTATTC CATTCCCTTAA TGTACAACCTT GATTAAATAT
181 ATTCAGTCCA TCTTTTATTT TCATTTTCAC TTATATAATC AAGTTATTAT TTTGACCAAT
241 CCATGTTTAA TCTCTTGGTG ATATATTTCC TTACATATAA TTATTTTCTA CCAAATTTAC
301 TATATGACAT ATTATATTTT ACCAAATTAC TTCTTAGTCA AATTTTCTAT AAGAATAAGT
361 TGGTTCAGTG TATATATTTT GATTTTGGTT GGATTTTGTG TCACCAATTA TCTATATAAA
421 AACTCATTAG ATCTCAACAC AAAACATAAG AAAATATTTT ACAACAATAC ATTATACATT
481 AGAACAATAC TTCAAAAAAA TGGCCAAGAT CAAATCTTTA GATGTTATTA CTGTCGCAAT
541 AATTTTGTG TTGGTGATTG CAGGTTAATC AAGCACTCTT ATTTTCTCA TTTTCAAAT
601 ACGTTCTTAG ATATAATCAT GTATATTATA TTTTAAAGCT TACAATTCCT TTGGTTTTAT
661 ACATTACATT TCTTTTTAAT TAGTACTTTT TATTATTTT GTAGATCAAG CAACTGCAAT
721 TACTGTTCAA GCCGATTGTA TTGGACCGTG CAATGACGAT TGCCAGCAGC TTTGCAAGTC
781 GAAAGGTTAC ACAGACTGGA CTTGTGCATC ATTTAGAACC AAGTCGAGTT GTTGTGCAA
841 ACCACCGAGA CATCAAATCT TTGAACAAAA TGCTCAATTG AACAATAAA ACCGCTTTTA
901 TATTGTTCTC AATTTGTATG ATCATTAACA AATATTCAA GATAAGAAAT AATTTAGAGA
961 AATCAATTGA TATCATTTT TCTTATCACT TATCATCATT CTACTCTTGA TTTTGGGCTA
1021 TTTTGTAAATA AGATAACCTG AATTACAATA GCACTGTTTG ATCATAGTAT TTTTATTGTA
1081 TTAAAACGGC ACCGTTTAGG TTAATCTTGG TCTTAGTTTT CGATTCGGGA ACGCCGCCGT
1141 CCAATCACA CAACTGGGTA AAAACGATAT GGAAGACGAT GGTGAGACT CCGTCGCCGA
1201 AACCTTAGAT CCGGCATTGC AGAAGAAGCA CCATGATATG CTCGAGCGTC TCTCCGCTCG
1261 TCACCAAGCT CGAAAATCAG ATTCACCTGA CTCTTCCTCT TCGTCGTCCT CCACTCTTGA
1321 ATCGACTTCC TCGTTTCTCG CTAAATTCTC CGATTCAAAG CGATCCATCG AGTCTCGGAT
1381 CGCCGAGTC

```

//

```

LOCUS          4      1370 bp      DNA      linear PLN 25-FEB-2004
ACCESSION     4
VERSION       GeneMark.hmm v3.0 self_training

```

ORGANISM A.thaliana  
FEATURES CHR ---  
CDS complement(join(500..711,804..870))  
/translation="MKYGVLFMVSCGVMFLILSHVEEVEAMKKFGCNTTHPFPKCG  
NNGKSSWVSDMKKLP SAPKNRDIRCECSRPSLARGMPGERVCRCDYDC"

ORIGIN  
1 TCTCTTTGAC TCTCGCTATA TATTCCATCA TATGTATATA TACTGAATCC AATTAGGTTG  
61 ATTTGACTTC TATAAGAGAC TTAATCAGAT GTGTAATTCG TTCATAATAA ATGATGTTTA  
121 CATGTTTTGA TACTGTCATT GGCCACATAC GTTATCTCAT AAGAGAAAACA AAGTGCTTGT  
181 ACTCCACTTT TACAAAAAAA ATATCATTTT GACACCTCTC ACAAATTAAT AAAGCCACTA  
241 AATAATACAA ATATGTCCTT TATATATATA ATAAGTGATT AATTATACAA TAATGACTAA  
301 AATTCAAAGA AAAATAGGTT TGGATTAAGG GTATATTAGA AAAAAGTCAC ATTAAAATGA  
361 ACATTTTTTT GTAGAATGGA GAGCTATTAA CTCACAATCA TATGTATTTT AGAATAACAA  
421 GCAATCTACT TTGGCAAAAA CTTTTTTTATT TTATTTTAAA GCACGTCATG TTCTATTAGT  
481 TATGGAAATA TTATAAGACT TAACAATCAT AATCACATCT ACATACACGC TCGCCAGGCA  
541 TACCCCTAGC TAAACTTGGA CGGTCAGAAC ATTCGCAACG TATATCACGA TTTTTTGGTG  
601 CGCTTGGAAG CTTTTTCATG TCACTTACCC AAGAACTCTT TCCATTATTT CCACATTTTC  
661 CAGGAAAAGG GTGTGTAGTG TTGCACCCAA ACTTCTTCAT GGCTTCAACC TCTGTTGTGT  
721 TATCAACCAC AAAAATAAAA TGTTAAGACT ATGAAAATAT ATATACAAAA CAGTTGATAA  
781 CACAAAATAA GGAAACAAGT TACCTTCAAC ATGGCTTAGA ATTAGAAACA TGACACCACA  
841 AGAAACCATA AACAAAACCTC CATATTTTAT GACTTATAGT CTAAACAAAT AGTCTCTTTG  
901 AGCTTCAAAA ATTTGTGTTT TGTTTTACTC TCATAGAAAAG TATATTAAGT TTTCTTTGCC  
961 AACAATCTTC ATAATTAATA TACTCAACAA GATAAAAATA TATGTGGCTA TTTGTTAAGA  
1021 TTTAGCAACA AAGAACACAA CATGAAGAAG CTTGAGGAAG AAGAAATGCC AACTCAGCAA  
1081 AGGGGACACG TCAACAGCAG GACCACAAGA CAAAGAAGGA GCCGTTAGCG CCAACCAGGG  
1141 TTATGAGTCG CACGACTAAA GCATTCTTGT CTTGGTTTGG TAAAGTTGCA CGCGGGTTAA  
1201 GCCCAATCCA AATTGGTGGA AGGTGACAAA TTTGGAGGCA GCTTGGAGAC AGCTGTAGAG  
1261 GAGCTTGTAG AGGCAAACCA AGAAGGATCC AGAAGGGAAC CTAGGTTAAA ACCTCTAAGT  
1321 CCATTTAAGC TGAAGGTGGT GCTTAGAGAC AGAGTTAGAA ACGTAGAGAC

//

LOCUS 5 1305 bp DNA linear PLN 25-FEB-2004  
ACCESSION 5  
VERSION GeneMark.hmm v3.0 self\_training  
ORGANISM A.thaliana  
FEATURES CHR ---  
CDS complement(500..805)  
/translation="MASGGFRYSSSRSFAPFRRTGHMLAAVGSMPVKVTSVRQFRLN  
SSLYVSGPTARAGAPRSFFLCGTMPGREGNASRRRTTTRQLHFGFSLHEMSPVHWTD  
G"

ORIGIN  
1 AACTGCCGT CTGTTCCCTT CAGTCCCTTA GCGCCCCGGG ACGGGAGTGG GGGACGGCTC  
61 TACGCGCAGG CAACAGCAGC ACCGGCTCCA CGAAGTCTGA ATCGAATCTT TCTGTTGGCT  
121 TTCCCAAATT CATTTCGTAGA TCAAAATCAA AGGGCTAGAA GCGAGCGCTT CTAGCTGCTT  
181 CGCCTGCTTC TTCTTATTAT GCGGGCCATG TTGGCGTGGC GAAAATGAAC GAAAAGCGAG  
241 ATGAACGTGC TATTTTCAA TCGGATTGAT AGATTGATCT GTTCTGATAG ATCTAAAGAG  
301 TAGAAATAGA TAGAGAATAG AGAGGGAATC AATAATAAGG TCTTTGAGCC TATTTCTATC  
361 TATTGATGAG ACAACTATCT ATTCTTGATC CATCAGAAAAG AAATTATTTA TCCATCAGAA  
421 AGAAATCGAT ATGTATCTGA TGGAGTCTTC TACATCGTAC GTAGAGCGCC CAAGCGCTTT  
481 TTGGGCCAGC TCAGTTCTCT TATCCATCGG TCCAATGCAC TGGGCTCATC TCATGGAGGG  
541 AAAAGCCAAA ATGTAGTTGT CTTGTTGTTG TTCGCCGCCT CGACGCATTC CCTTCTCTCC  
601 CCGGCATCGT CCCACACAGA AAGAAAGAGC GCGGAGCCCC GGCTCGAGCC GTAGGTCCGC  
661 TAACGTAAAG CGAGGAGTTG AGCCTGAACT GGCGAACCGA AGTCACTTTC GGAACCATAC  
721 TTCCTACAGC TGCTAACATG TGCCCAGTCC TGCGGAAAGG CGCAAACGAA CGTGAGCTGC  
781 TATACCGGAA TCCCCCGCTG GCCATCGGG ACCGAGTGGT AAGGCCATGA TCTGCAGGGG  
841 AACGGATCAC TCATTCTTCC ATTGGGGACA GGTGCACGAA CGACAACCTC AAACGTCACA

```
901 CATCCGCCGC CTA CTTACCG TTTAGGTGGC ACCAGCGAGA TCCAGCTAAG GAAAAAGAGT
961 GTCGCGGCTG CTC CACTCCG CCGCGGTCTC ATGAACTTCA CTTTCGTTGCC TTCCCGCGCG
1021 CAAAGCGAAT GGGCGCTGTG CTGTGGGTCA GTTTCGGGGC GGGGGGCGCA GAGATACCAG
1081 AATAAATGAT TCATTTGTTT GGATCGACGA GCTTTTTTCAG CCCCAAAAC T CAGAATCAAT
1141 GGAATGTCTG TCCATAAACA TCTATTCTAT CTGTATATAT AGGGGATCTC TCTATACATA
1201 TCAAAGTCTT TTATGGCATT GATATGATCG CCTAGCTGTA GCCGCATATC ACAGCTGCAC
1261 TCAATATGCG GATTTCTGTT GGATTAGATC TTTTCTTTTCG CTTTG
```

//

```
LOCUS          6      1347 bp      DNA      linear PLN 25-FEB-2004
ACCESSION      6
VERSION        GeneMark.hmm v3.0 self_training
ORGANISM       A.thaliana
FEATURES
  CDS           CHR    ---
                complement (500..847)
                /translation="MERRNRRTGRTEKARIWEVTDRTVVRTWIGEAVAAAAADGVTFS
                VPVTPHTFRHSYAMHMLYAGIPLKVLQSLMGHKSISSTEVIYTKVFALDVAARHRVQF
                AMPESDAVAMLKQLS"
```

ORIGIN

```
1  TAAAAATATC CCCGTGGATA AGTGGATAAC CCCAAGGGAA GTTTTTTCAG GCATCGTGTG
61 TAAGCAGAAT ATATAAGTGC TGTTCCCTGG TGCTTCCTCG CTCACTCGAG GGCTTCGCCC
121 TGTCGCTCGA CTGCGGCGAG CACTACTGGC TGTA AAAAGGA CAGACCACAT CATGGTTCTG
181 TGTT CATTAG GTTGT TCTGT CCATTGCTGA CATAATCCGC TCCACTTCAA CGTAACACCG
241 CACGAAGATT TCTATTGTT CTGAAGGCAT ATTCAAATCG TTTTCGTTAC CGCTTG CAGG
301 CATCATGACA GAACACTACT TCCTATAAAC GCTACACAGG CTCCTGAGAT TAATAATGCG
361 GATCTCTACG ATAATGGGAG ATTTTCCCGA CTGTTTCGTT CGCTTCTCAG TGGATAACAG
421 CCAGCTTCTC TGTTTAACAG AAAAAACAG CATATCCACT CAGTTC CACA TTTCCATATA
481 AAGGCCAAGG CATTTATTCT CAGGATAATT GTTTCAGCAT CGCAACCGCA TCAGACTCCG
541 GCATCGCAA ACTGATGGAC TTATGTCCCA TCAGGCTTTG CAGA ACTTTC AGCGGTATAC
601 CTTCCGTTGA ACTGATGGAC TTATGTCCCA TCAGGCTTTG CAGA ACTTTC AGCGGTATAC
661 CGGCATACAG CATGTGCATC GCATAGGAAT GGC GGAACGT ATGTGGTGTG ACCGGAACAG
721 AGAACGTCAC ACCGTCAGCA GCAGCGGCGG CAACCGCCTC CCCAATCCAG GTCCTGACCG
781 TTCTGTCCGT CACTTCCCAG ATCCGCGCTT TCTCTGTCCT TCCTGTGCGA CGGTTACGCC
841 GCTCCATGAG CTTATCGCGA ATAAATACCT GTGACGGAAG ATCACTTCGC AGAATAAATA
901 AATCCTGGTG TCCCTGTTGA TACCGGGAAG CCCTGGGCCA ACTTTTGGCG AAAATGAGAC
961 GTTGATCGGC ACGTAAGAGG TTCCA ACTTT CACCATAATG AAATAAGATC ACTACCGGGC
1021 GTATTTTTTTG AGTTATCGAG ATTTTCAGGA GCTAAGGAAG CTAAAATGGA GAAAAAATC
1081 ACTGGATATA CCACCGTTGA TATATCCCAA TGGCATCGTA AAGAACATTT TGAGGCATTT
1141 CAGTCAGTTG CTCAATGTAC CTATAACCAG ACCGTT CAGC TGGATATTAC GGCCTTTTTA
1201 AAGACCGTAA AGAAAAATAA GCACAAGTTT TATCCGGCCT TTATTCACAT TCTTGCCCCG
1261 CTGATGAATG CTCATCCGGA ATTC CGTATG GCAATGAAAG ACGGTGAGCT GGTGATATGG
1321 GATAGTGTT ACCCTTGTTA CACCGTT
```

//

```
LOCUS          7      1659 bp      DNA      linear PLN 25-FEB-2004
ACCESSION      7
VERSION        GeneMark.hmm v3.0 self_training
ORGANISM       A.thaliana
FEATURES
  CDS           CHR    ---
                500..1159
                /translation="MEKKITGYTTVDISQWHRKEHFQSV AQCTYNQTVQLDITA
                FLKTVKKNKHKFYPAFIHILARLMNAHPEFRMAMKDGELVIWDSVHPCYTVFHEQTE
                TFSSLWSEYHDDFRQFLHIYSQDVACYGENLAYFPKGF IENMFFVSANPWSFTSFD
                LNVANMDNFFAPVFTMGKYTQGDKVLMLAIQVHHAVCDGFHVGRMLNELQQYCDE
                WQGGGA"
```

ORIGIN

```

1 GCAGCCACAT CCAGCGCAAA AACCTTCGTG TAGACTTCCG TTGAACTGAT GGACTTATGT
61 CCCATCAGGC TTTGCAGAAC TTTTCAGCGGT ATACCGGCAT ACAGCATGTG CATCGCATAG
121 GAATGGCGGA ACGTATGTGG TGTGACCGGA ACAGAGAACG TCACACCGTC AGCAGCAGCG
181 GCGGCAACCG CCTCCCAAT CCAGGTCCTG ACCGTTCTGT CCGTCACTTC CCAGATCCGC
241 GCTTTCTCTG TCCTTCCTGT GCGACGGTTA CGCCGCTCCA TGAGCTTATC GCGAATAAAT
301 ACCTGTGACG GAAGATCACT TCGCAGAATA AATAAATCCT GGTGTCCCTG TTGATACCGG
361 GAAGCCCTGG GCCAACTTTT GGCGAAAATG AGACGTTGAT CGGCACGTAA GAGGTTCCAA
421 CTTTCACCAT AATGAAATAA GATCACTACC GGGCGTATTT TTTGAGTTAT CGAGATTTTC
481 AGGAGCTAAG GAAGCTAAAA TGGAGAAAAA AATCACTGGA TATACCACCG TTGATATATC
541 CCAATGGCAT CGTAAAGAAC ATTTTGAGGC ATTTTCAGTCA GTTGCTCAAT GTACATATAA
601 CCAGACCGTT CAGCTGGATA TTACGGCCTT TTTAAAGACC GTAAAGAAAA ATAAGCATAA
661 GTTTTATCCG GCCTTTATTC ACATTCTTGC CCGCCTGATG AATGCTCATC CGGAATTCCG
721 TATGGCAATG AAAGACGGTG AGCTGGTGAT ATGGGATAGT GTTCACCCTT GTTACACCGT
781 TTTCCATGAG CAAACTGAAA CGTTTTTCATC GCTCTGGAGT GAATACCACG ACGATTTCCG
841 GCAGTTTCTA CACATATATT CGCAAGATGT GGCCTGTTAC GGTGAAAACC TGGCCTATTT
901 CCCTAAAGGG TTTATTGAGA ATATGTTTTT CGTCTCAGCC AATCCCTGGG TGAGTTTCAC
961 CAGTTTTGAT TTAAACGTGG CCAATATGGA CAACTTCTTC GCCCCCGTTT TCACCATGGG
1021 CAAATATTAT ACGCAAGGCG ACAAGGTGCT GATGCCGCTG GCGATTGAGG TTCATCATGC
1081 CGTTTGTGAT GGCTTCCATG TCGGCAGAAT GCTTAATGAA TTACAACAGT ACTGCGATGA
1141 GTGGCAGGGC GGGGCGTAAT TTTTTTAAGG CAGTTATTGG TGCCCTTAAA CGCCTGGTTG
1201 CTACGCCTGA ATAAGTGATA ATAAGCGGAT GAATGGCAGA AATTCGATGA TAAGCTGTCA
1261 AACATGAGAA TTGGTCGACG GCCCGGGCGG CCGCAAGGGG TTCGCGTTGG CCGATTGATT
1321 AATGCAGCTG GCACGACAGG TTTCCCGACT GGAAAGCGGG CAGTGAGCGC AACGCAATTA
1381 ATGTGAGTTA GCTCACTCAT TAGGCACCCC AGGCTTTACA CTTTATGCTT CCGGCTCGTA
1441 TGTTGTGTGG AATTGTGAGC GGATAACAAT TTCACACAGG AAACAGCTAT GACCATGATT
1501 ACGCCAAGCT ATTTAGGTGA CACTATAGAA TACTCAAGCT TTTATGATCC ATTTGCCGTG
1561 GGTCCCACCA GCTATGTAGG AATACCCTAT CTTCTTTATA AGAGCTTTGA TACATGGAAA
1621 ATATTGGAAA ACAATGTCCG AACATATAAT TTCCCCCCC

```

//

```

LOCUS      8      1659 bp      DNA      linear PLN 25-FEB-2004
ACCESSION  8
VERSION    GeneMark.hmm v3.0 self_training
ORGANISM   A.thaliana
FEATURES   CHR ---
CDS        complement (500..1159)
           /translation="MEKKITGYTTVDISQWHRKEHFEAFQSV AQCTYNQTVQLDITA
           FLKTVKKNKHKFYPAFIHILARLMNAHPEFRMAMKDGELVIWDSVHPCYTVFHEQTE
           TFSSLWSEYHDDFRQFLHIYSQDVACYGENLAYFPKGF IENMFFVSANPWSF TSFD
           LNVANMDNFFAPVFTMGKYTQGDKVLMLPLAIQVHHAVCDGFHVGRMLNELQQYCDE
           WQGGA"

```

ORIGIN

```

1 AGGATGAACT GTAACCGGAT TCATATCCTC AAGATGCTCA TTGTATTCTG CATTTAGATT
61 GACATCACGA ACCACGCGGC TTCCATTAGA TGGTTGCACA AACAAAGGGC TCAACTCAAG
121 CTTGAGTATT CTATAGTGTC ACCTAAATAG CTTGGCGTAA TCATGGTCAT AGCTGTTTCC
181 TGTGTGAAAT TGTTATCCGC TCACAATTCC ACACAACATA CGAGCCGGAA GCATAAAGTG
241 TAAAGCCTGG GGTGCCTAAT GAGTGAGCTA ACTCACATTA ATTGCGTTGC GCTCACTGCC
301 CGCTTTCCAG TCGGGAAACC TGTCGTGCCA GCTGCATTAA TGAATCGGCC AACCGGAACC
361 CTTGCGGCC GCCCGGGCCG TCGACCAATT CTCATGTTTG ACAGCTTATC ATCGAATTTT
421 TGCCATTCAT CCGCTTATTA TCACTTATTC AGGCGTAGCA ACCAGGCGTT TAAGGGCACC
481 AATAACTGCC TTAAAAAAT TACGCCCCGC CCTGCCACTC ATCGCAGTAC TGTTGTAATT
541 CATTAAAGCAT TCTGCCGACA TGGAAGCCAT CACAAACGGC ATGATGAACC TGAATCGCCA
601 GCGGCATCAG CACCTTGTCG CTTGCGTAT AATATTTGCC CATGGTGAAA ACGGGGGCGA
661 AGAAGTTGTC CATATTGGCC ACGTTTTAAT CAAAACGGT GAAACTCACC CAGGGATTGG
721 CTGAGACGAA AAACATATTC TCAATAAACC CTTTAGGGAA ATAGGCCAGG TTTTCACCGT

```

```

781 AACACGCCAC ATCTTGCGAA TATATGTGTA GAAACTGCCG GAAATCGTCG TGGTATTCAC
841 TCCAGAGCGA TGAAAACGTT TCAGTTTGTCT CATGGAAAAC GGTGTAACAA GGGTGAACAC
901 TATCCCATAT CACCAGCTCA CCGTCTTTCA TTGCCATACG GAATTCCGGA TGAGCATTCA
961 TCAGGCGGGC AAGAATGTGA ATAAAGGCCG GATAAACTT GTGCTTATTT TTCTTTACGG
1021 TCTTTAAAAA GGCCGTAATA TCCAGCTGAA CGGTCTGGTT ATAGGTACAT TGAGCAACTG
1081 ACTGAAATGC CTCAAAATGT TCTTTACGAT GCCATTGGGA TATATCAACG GTGGTATATC
1141 CAGTGATTTT TTTCTCCATT TTAGCTTCCC TTAGCTCCTG AAATCTCGAC CGCACAGATG
1201 CGAAGGAGAA AATACCGCAT CAGGAAATTG TAAGCGTTAA TATTTGTAA ATTCGCGTTA
1261 AATTTTTGTT AAATCAGCTC ATTTTTTAAC CAATAGGCCG AAATCGGCAA AATCCCTTAT
1321 AAATCAAAAG AATAGACCGA GATAGGGTTG AGTGTGTGTC CAGTTTGAA CAAGAGTCCA
1381 CTATTAAGA ACGTGGACTC CAACGTCAA GGGCGAAAA CCGTCTATCA GGGCGATGCG
1441 CCACTACGTG AACCATCACC CTAATCAAGT TTTTTGGGGT CGAGGTGCCG TAAAGCACTA
1501 AATCGGAACC CTAAAGGGAG CCCCCGATT AGAGCTTGAC GGGGAAAGCC GGCGAACGTG
1561 GCGAGAAAGG AAGGGAAGAA AGCGAAAGGA GCGGGCGCTA GGGCGCTGGC AAGTGTAGCG
1621 GTCACGCTGC GCGTAACCAC CACACCCGCC GCGCTTAAT

```

//

```

LOCUS          9      2157 bp      DNA      linear PLN 25-FEB-2004
ACCESSION     9
VERSION       GeneMark.hmm v3.0 self_training
ORGANISM      A.thaliana
FEATURES      CHR ---
               CDS      complement (500..1657)

```

```

/translacion="METLNQCINAGHEMTKAIAIAQFNDDSPARKITRRWRIGEEA
DLVGVSSQAIRDAEKAGRLPHPDMEIRGRVEQRVGYTIEQINHMRDVFGRRLRAED
VFPPVIGVAAHKGGVYKTSVSVHLAQDLALKGLRVLLVEGNDPQGTASMYHGWVPLD
HIHAEDTLLPFYLGEKDDVTYAIKPTCWPGLDIIP SCLALHRIETELMGKFDEGKLP
TDPHMLRLRLAIETVAHDYDVIVID SAPNLGIGTINVVCAADVLI VPTPAELFDY TSA
LQFFDMLRDLKKNVDLKGFE PDVRILLTKYSNSNGSQSPWMEEQIRD AWGSMVLKNV
VRETDEVGKGQIRMRTVFEQAIDQRSSTGAWRNALSIWEPVCNEIFDRLIKPWEIR
"

```

ORIGIN

```

1  TAACGCTGAC CACGTTTATA AGCACTTGTT GGGCGATAAT CGTTACCCAA TCTGGATAAT
61 GCAGCCATCT GCTCATCATC CAGCTCGCCA ACCAGAACAC GATAATCACT TTCGGTAAGT
121 GCAGCAGCTT TACGACGGCG ACTCCCATCG GCAATTTCTA TGACACCAGA TACTCTTCGA
181 CCGAACGCCG GTGTCTGTTG ACCAGTCAGT AGAAAAGAAG GGATGAGATC ATCCAGTGCG
241 TCCTCAGTAA GCAGCTCCTG GTCACGTTCA TTACCTGACC ATACCCGAGA GGTCTTCTCA
301 ACACTATCAC CCCGGAGCAC TTCAAGAGTA AACTTCACAT CCCGACCACA TACAGGCAAA
361 GTAATGGCAT TACCGCGAGC CATTACTCCT ACGCGCGCAA TTAACGAATC CACCATCGGG
421 GCAGCTGGTG TCGATAACGA AGTATCTTCA ACCGGTTGAG TATTGAGCGT ATGTTTTGGA
481 ATAACAGGCG CACGCTTCAT TATCTAATCT CCCAGCGTGG TTTAATCAGA CGATCGAAAA
541 TTTCAATTGCA GACAGGTTCC CAAATAGAAA GAGCATTCTT CCAGGCACCA GTTGAAGAGC
601 GTTGATCAAT GGCCTGTTCA AAAACAGTTC TCATCCGGAT CTGACCTTTA CCAACTTCAT
661 CCGTTTCACG TACAACATTT TTTAGAACCA TGCTTCCCCA GGCATCCCGA ATTTGCTCCT
721 CCATCCACGG GGACTGAGAG CCATTACTAT TGCTGTATTT GGTAAGCAAA ATACGTACAT
781 CAGGCTCGAA CCCTTTAAGA TCAACGTTCT TGAGCAGATC ACGAAGCATA TCGAAAAACT
841 GCAGTGCGGA GGTGTAGTCA ACAACTCAG CAGGCGTGGG AACAATCAGC ACATCAGCAG
901 CACATACGAC ATTAATCGTG CCGATACCCA GGTTAGGCGC GCTGTCAATA ACTATGACAT
961 CATAGTCATG AGCAACAGTT TCAATGGCCA GTCGGAGCAT CAGGTGTGGA TCGGTGGGCA
1021 GTTTACCTTC ATCAAATTTG CCCATTAACT CAGTTTCAAT ACGGTGCAGA GCCAGACAGG
1081 AAGGAATAAT GTCAAGCCCC GGCCAGCAAG TGGGCTTTAT TGCATAAGTG ACATCGTCCT
1141 TTTCCCCAAG ATAGAAAGGC AGGAGAGTGT CTTCTGCATG AATATGAAGA TCTGGTACCC
1201 ATCCGTGATA CATTGAGGCT GTTCCCTGGG GGTGCTTACC TTCCACGAGC AAAACACGTA
1261 GCCCCTTCAG AGCCAGATCC TGAGCAAGAT GAACAGAAAC TGAGGTTTTG TAAACGCCAC
1321 CTTTATGGGC AGCAACCCCG ATCACCAGTG GAAATACGTC TTCAGCACGT CGCAATCGCG
1381 TACCAAACAC ATCACGCATA TGATTAATTT GTTCAATTGT ATAACCAACA CGTTGCTCAA

```

```

1441 CCCGTCCTCG AATTTCCATA TCCGGGTGCG GTAGTCGCCC TGCTTTCTCG GCATCTCTGA
1501 TAGCCTGAGA AGAAACCCCA ACTAAATCCG CTGCTTCACC TATTCTCCAG CGCCGGGTTA
1561 TTTTCCTCGC TTCCGGGCTG TCATCATTAA ACTGTGCAAT GGCGATAGCC TTCGTCATTT
1621 CATGACCAGC GTTTATGCAC TGGTTAAGTG TTTCCATGAG TTTCAATTCTG AACATCCTTT
1681 AATCATTGCT TTGCGTTTTT TTATTAATC TTGCAATTTA CTGCAAAGCA ACAACAAAAT
1741 CGCAAAGTCA TCAAAAAACC GCAAAGTTGT TTAATAAAG AGCAACACTA CAAAAGGAGA
1801 TAAGAAGAGC ACATACCTCA GTCACCTATT ATCACTAGCG CTCGCCGCG CCGTGTAACC
1861 GAGCATAGCG AGCGAACTGG CGAGGAAGCA AAGAAGAACT GTTCTGTCTAG ATAGCTCTTA
1921 CGCTCAGCGC AAGAAGAAAT ATCCACCGTG GGAAAAACTC CAGGTAGAGG TACACACGCG
1981 GATAGCCAAT TCAGAGTAAT AAAGTGTGAT AATCAACCCT CATCAATGAT GACGAACTAA
2041 CCCCCGATAT CAGGTCACAT GACGAAGGGA AAGAGAAGGA AATCAACTGT GACAAACTGC
2101 CCTCAAATTT GGCTTCCTTA AAAATTACAG TTCAAAAAGT ATGAGAAAAT CCATGCA

```

//

```

LOCUS          10          4102 bp          DNA          linear PLN 25-FEB-2004
ACCESSION      10
VERSION        GeneMark.hmm v3.0 self_training
ORGANISM       A.thaliana
FEATURES              CHR ---

```

```

CDS
join(500..592,852..1119,1204..1343,1420..1555,1631..1879,1941..2026,2100..2196,2
276..2381,2463..2556,2640..2839,2923..3022,3111..3227,3323..3379,3495..3602)

```

```

/translation="MCGIAIVVCGVRIELSTLSSSLSETETPFERLQVSVEDVKAVL
SQRGPDSVGEKTIHLRPNCQESATLSVVETSEGTYKLEETTS LGELHFIGSTLQLR
GTSPIRQPLVDSSGNILAYNGEVFGGIELNSYDNDTEVLLKSLEKAKSLVDPVLSMI
KGPWAI IYWQESSRTLWFGKDPFGRRSLLVHSPTVEDPRFLLSSVSPASSVSQGAGL
DTENGNLHRYWEELPCGVYSISFGVSELCIHGEVTKHEWRNTIWKELIEWERKLVV
PRPEDLSTSSLSGVQEDKSVSTSLGLALGFAQTVLVVLKESVRRRTSLHSIYQGDKE
AVPVAVLFSGGLDSMILAALLHQCLDPKYEVDLLNVSFDGPNAPDRI SAKAGIKELK
KIAPFRRWKLVEIDADLSKLGFEFKRVMSLINPADTYMDLNIGTALWLAARGDGWIH
EDNGNPSVEENNQRVKYKSDARILLVGAGADEQCAGYGRHRTKYRNGSWVALDQEMK
LDMQRIWKRNLGRDDRCIADNGKEGRFPFLDEDVIKTLDDIPLWEIADLEQPSGTGD
KKILRQVASLLGVHEVAKMPKRAIQFGSRIARES NRKNFGSNRAANQASAGSVRFLA
PSH"

```

ORIGIN

```

1   TTTAGTTAAT GTATTTTATT TAATTTTAAA AATTTTAAGA ATTAATAAAA ATTACATTTT
61  GTTGTAATA TATACAAAGG CCAGGTTTTT AAGTTAATGT ATATATATAT AAAGAAATAT
121 TTTGTTTTCT TTGCTAAAAA TGTAATAATA TGTGTGTCTT TATTAGTTTC TAGCTTTTTT
181 TTATTTTAGT CGAATGTTTA ACATGTTTTT CGCTGTTATG GTATAGATTG GGCCAACTTG
241 AAAAAATAA AGTCCATAAA ATGCCAATTT GATAAGCCCA TATAAAAAAA TTGAATTTAA
301 AAAAAGCCTA CGGTGAGGAT CGAACTCACG ACCTTTTCGCT TACGAAGCGA ACGCAATACC
361 ACTATGCTAC GGAGGCAATT TGTTCAATTT ATAGAATCAT TTTAGAAGAA TGTTTATTAC
421 TTGTTAAACA GGCTTTAAGT AACTTTTCATG ACAACAACCT TGACGGAAAC GGAGACCAGA
481 AACAGACGCC GGCGGAGATA TGTGCGGAAT TGCAATTGTA GTGTGCGGCG TTCGTATCGA
541 ACTCTCGACA CTTTCGTCGT CTCTCTCTGA AACTGAGACT CCTTTCGAAC GAGTAAATCT
601 CTCTCTCCAA CGTCAGTTGT GATTTTAGTA TGAATTGCTT TTGGGTTTAG AAGTTTAGGG
661 TTTTTGTTCT GTCTGAAGTA ATTTAGCATC ATTGGTAAAG CTTGAATCTT TAATCGAGTT
721 TGTTCTTATA TAGAAAGAAA GACTTACACT TTTGAGTTTT TATCGATGGA TAATGGTAAT
781 GTATTGAGAT GAGAGTGAAT TTGGTTGTTT ATAGATGAGC TAATTTGGTG TGTTTTCTTG
841 GTTTAAACCA GTTACAAGTC TCTGTTGAAG ATGTTAAAGC TGTCTTAAAG CAAAGAGGTC
901 CTGATAGTGT AGGAGAAAAG ACTATTCATC TTCGACCAA TGTGTGTCAA GAATCTGCTA
961 CTCTCTCTGT TGTTGAGACT AGTGAAGGAA CTTATAAGCT TGAGGAGACT ACTTCTTTGG
1021 GTGAATTGCA TTTTATTGGT TCTACATTAC AGCTTAGAGG AACTAGTCCT ATAAGGCAAC
1081 CATTGGTGGA TTCTTCTGGG AACATTCTAG CTTACAATGG TGTGGTGTTA TTCTTAAGGT
1141 TTTTTGATTA TCATATGTTT TCTCTTACAC TATACGATAT TGATTTGTAT ATTTTCCGTA
1201 CAGGCGAAGT ATTTGGTGGA ATTGAACTCA ACAGCTATGA TAATGATACT GAAGTGCTTT

```

1261 TGAAGTCTTT AGAGAAAGCA AAATCTTTAG TTCCAGATGT TCTTTTCGATG ATTTAAAGGTC  
1321 CCTGGGCCAT TATATATTGG CAGGTAATTT GGTAACCTGC TGCTATTTGT TTATGTAGCA  
1381 TTTTTTTTTA CTTTCTCTAA GAGCATTFFF CTCTATCAGG AAAGCTCGAG AACGTTATGG  
1441 TTTGGTAAAG ATCCGTTTGG TCGGAGGAGC CTTCTTGTTT ACTCGCCAAC TGTGGAAGAC  
1501 CCTCGTTTTT TTCTATCGTC TGTTTTACCA GCTTCTTCAG TTTCTCAAGG TGCTGGTTTTG  
1561 TATTACTTAG TAGAGCAATT TTGTCTCTTT ATGTACACTC CAAGCTCAAG TAACATCTGT  
1621 TCTTTTGCAG GATTGGATAC TGAAAATGGT AATAGCCTTC ATAGATATTG GGAAGAGCTT  
1681 CCATGTGGCG TGTACAGTAT TTCTTTTGGG GTTTCAGAAT TATGTATTCA TGGTGAAGTT  
1741 AAAAAACACG AATGGAGAAA TACCATCTGG AAAGAATTGA TTGAATGGGA AAGGAAATTA  
1801 GTTGTACCTA GACCTGAAGA TCTATCAACG TCATCGCTTA GTGGAGTTCA GGAAGACAAA  
1861 TCTGTCTCAA CTTCTCTAGG TACTGCTTAA GAATCGTTTG ATTCTCCAG TCCTGTCCAA  
1921 ATCTCAACAT GTCTGACAAG GTTTAGCTTT AGGATTTGCG CAGACAGTTT TGGTCGTGTT  
1981 AAAGGAATCA GTGAGGCGGC GAACCTTCACT TCATAGCATT TATCAGGTAT GAGCTTAAAC  
2041 TTGTTTTTTC TCTGAAGCTA TGTGTTTTCT TCTGAACACC TTCGTATTGG CATAAACAGG  
2101 GAGATAAAGA AGCTGTCCCA GTAGCTGTTT TTTTCTCTGG TGGATTGGAT TCGATGATTC  
2161 TTGCTGCGCT GTTGCATCAG TGCCTTGATC CAAAATGTAA CCATTCCCCC AACTGTTTT  
2221 TGTCTCGGCC AACAATTCTG AAATAATCA AAAGAAGTAA TATCTATTTT TTCAGATGAA  
2281 GTTGTACTCC TTAATGTCAG TTTTGATGGT CCTAATGCTC CTGATAGGAT CTCCGCCAAG  
2341 GCTGGAATAA AGGAAC TAAAGATTGCA CCTTTTAGAA GGTTGAACTT CAAAAGCCTT  
2401 TTATGAAAAA TGCATATATC TGTTACTATC TATGTTGATA CAAATGTTTT TGGAATTTTC  
2461 AGGTGGAAC TTGTTGAGAT TGATGCTGAT CTGTCAAAC TAGGCTTTGA GACAAAACGT  
2521 GTTATGTCAC TCATAAATCC TGCAGACACT TACATGGTAA ACCTCAAAGT CTTGAGCATT  
2581 GTGATTACAT TCCTCCGAAC TTGATGTGAA TTATTCAATC TTTTTTGTCT ATGTTCTAGG  
2641 ACCTTAACAT AGGAACAGCA TTATGGTTAG CTGCTCGTGG TGATGGTTGG ATTCACGAAG  
2701 ATAATGGAAA TCCAAGTGTA GAGGAAAATA ACCAGCGGGT CAAGTATAAG TCCGATGCTA  
2761 GAATCCTGCT TGTTGGCGCT GGTGCTGATG AGCAATGTGC CGGTTACGGT AGGCACAGAA  
2821 CTAAATATCG AAATGGAAGG TATATGATTC ATTTATGTAT ACATTTCTTA TGGATGTA  
2881 CTAATGTTAA CCTCATCGCA CAAGTTTTAT TCATTTTCC AGTTGGGTTG CGTTGGATCA  
2941 AGAAATGAAA TTAGATATGC AGAGAATTTG GAAAAGAAAT TTGGGTCGAG ATGATCGATG  
3001 CATTGCAGAT AACGGTAAAG AGGTATATGT CATCACGCCA CAACCACAAA CTCAAAAAAA  
3061 AAGTTTATTC TTTGTGCTTT GTTCTTAAAT CTTAAACGTT ACTTGTTTCC GGGCGATTCC  
3121 CGTTCTTAGA TGAAGATGTG ATAAAGACTC TCCTTGACAT TCCCTTGTGG GAAATCGCTG  
3181 ATCTTGAGCA ACCAAGTGGA ACGGGAGACA AGAAGATTCT TAGACAGGTG AGTAATTA  
3241 AAGATACCAT TTTTACTGTA AGAATGCCTC AAGAACATTC CAGAACTTC ATAAACCTGA  
3301 ATTGTTGCGT AAAATCTTGA AGGTTGCAAG CCTGCTTGGT GTACATGAAG TTGCAAAGAT  
3361 GCCTAAGAGA GCAATTCAGG TAAGAAGAAG AGAACTTTCT GAGAGAACTC AGTTTCAAAC  
3421 GAGTAAAGTT GAAATCTTTT TGTTGTGAGC TCTCTCTCTC TCACTGTTGC TTTGGACTTT  
3481 GGTTGTGGTT TTAGTTTGGG TCAAGAATCG CTCGTGAATC AAACCGGAAG AATTTTGGAA  
3541 GTAACCGTGC CGCAAACCAG GCTTCTGCCG GGAGCGTGAG ATTCCTAGCA CCGTCACACT  
3601 AATTCCCTCT GATTCATGTT AGATCAATCA TTGTTATACA TTGTATCCTA TACAAAGAGA  
3661 CATTCTTTCA ATGATCTCAA AACTGGTTTG AACACTGAAC ACAAATGGAC TAATAAGAGG  
3721 ACATGTTAAG ACTTAAACCA CTTGGTTCGG TATTTTGTCT AATTTCAAGG GTAAAATTGG  
3781 AAAAATCACA AGAAAAACAA AAGCCCTAAC ATTATTGTCT AAAATCAATT TTCTCCTCCG  
3841 GTGGTGATCT CTGTGCTCCG GCGCATAAAC CCCTGTAAAG CCAATAACTT GTTGTTCCCC  
3901 AAAGTTTGGT TCTTCATGTT GGAAACCGAA AGCAGTGTCT GCGACAACAT CGCCGGCAAT  
3961 GAGAAATGGC GAGCGGAAGC TGAAATTGGT GGCAACGAGA GAGCTCTGCA AGCGCTTCGA  
4021 GAACTCATTA TCTTCCCTTT TCGTTACCCT CTCGAAGCTC GAACTCTTGG TCTCAAAGTA  
4081 CATATATCCA CACCTCTGTT GG

//

LOCUS 1 1295 bp DNA linear PLN 25-FEB-2004  
ACCESSION 1  
VERSION GeneMark.hmm v3.0 self\_training  
ORGANISM A.gambiae  
FEATURES CHR ---  
CDS join(500..534,609..795)



/translation="MVNVMKGVLECDPAMKQFLLHLDLDETQSLGKKFIIQDLDEKHL  
FISVEIVEVLQARVDDLMDRISFPLHEKEA"

ORIGIN

```
1 TTAATGTTAC CTAACCAACC CGCGAGAGAA TCGAATGAGA ATGGTTTTGA TGGCCCGTTT
61 TGCGCGGATG TCAGAAGCAG CAGCAGGGGC AGTCGTGAGC AGGCGGGTTG GGTTATGTCA
121 TGTCGTTTTGA CAGTTTTGCG TAGATCGCGC ATTTTCATGGG CATGGAAATC TTAGTTTTTT
181 ACCTTTCTTC AGAGCTTATC ATGCAAGACA TGGCTATTTA GTTAATTGAA AGTTTATTAA
241 CATCACTTAA ATTTAGATTT TTGTTGTAAT TCGTATAAAA ACATTTATGT CAAGGCTGGA
301 CATTCAACAT GGCGGTGAAG AAATTCAGAA ACCTAACCTG GCTTTCTGCA CTTTTCCCAT
361 TTGACGTTTC GTTCCGTCAA CAGCGGTGTG CGAGCGGTTT GTTTACATTG TCTGCGATGC
421 AATAAATTGG TGAAATAACA ATCTTTCGGC GATTAGTTTA TCGTGCAATC GTTGATAAAA
481 CAACCCACAC TACTCAGCAA TGGTGAATGT TATGAAAGGC GTACTCGTTG AATGGTAAGA
541 ATCATCACTT TTCCTCTTGA ATACCTTCTT TCCGTCGTAC TCAATAGCTT CTCACTCAAT
601 CTCCACAGTG ATCCGGCTAT GAAACAGTTC CTACTIONCATC TGGACGAAAC GCAATCACTG
661 GGGAAGAAGT TTATCATAACA AGATTTGGAC GAGAAGCACC TGTTCAATTC GGTCGAAATC
721 GTCGAAGTAC TGCAAGCCCG CGTGGACGAT TTGATGGACC GCATCAGCTT CCCGCTACAC
781 GAGAAAGAAG CTTAAAAACT ACCATCCTGC CGAAGCCGTA GCACTCACTA CCAACCTGTA
841 AACAACTCT CAAACTCAAC TCCAACAAGA TGGCCGGTCG CGAATCGGGA CGTATCCGGG
901 AGGCGGACAA AAAGCGAACC CTGGACGATG CCGCACGCCA ACGACGCGCG CGCAAAGCGC
961 TGGAAGCACT CGAGCAGGAC AACTTCCACG AAGACCCGCA CGCGGACCTG GTCATGTGCA
1021 AGAAGGTGCC CAAATTCAGC GACAATCTCG ATGGCAGCGG ACCGAGCAAG AAGAAACACC
1081 GCCGCACGAA AGGGGCCGAA TACTATCGCG CAAAGTATCG TAAAACGTTT CCGCAGCTGC
1141 TGGATGAGGA ACGGCAGCAG CGACCCGATC CGCCGAACTA TTTTCAGTGC GCTGCACCCG
1201 CTTCCCGGCT GCCCGAGCGA CACTTTTGTG CGGTGTGTGG ATTTCCCTCC AGCTACACGT
1261 GCACGGCTTG CGGGACGCGG TACTGCTGCG TACGG
```

//

LOCUS 2 1322 bp DNA linear PLN 25-FEB-2004

ACCESSION 2

VERSION GeneMark.hmm v3.0 self\_training

ORGANISM A.gambiae

FEATURES CHR ---

CDS join(500..666,753..822)

/translation="MSEVATRIPKPVLRLHNLATIKRNLIVSGVLCTIAVVAMKVMH  
NDPKVRDYAEFYKTYDANKAFQRMKDAGLLQSVKD"

ORIGIN

```
1 ATTAGTACGA AGCTTTAAAA TAGCAACATT TTTTTATTGA TTTTTATATA GACTTCGAGG
61 ACATAGCACC ATTGCGCACT TCTGTTATAC AAAGCAAACG GTCCAATCAA ATTTGGTTTC
121 ACATGTTGAG CGATCTTGCT TGATTGGGTT AATTTTCTTG CAAATAACAT ATTTTATCGT
181 TTTCAATTTCA TCGCTATCTT TGCGTTGACA TTACATCGAG TAGACTTCGA CTGTCATTCT
241 TGTCTTTCTT CACTCTTTG TGATTTTCGG AACCAGAATT CCGTGCTGTG AAAAAACAGA
301 ACACACGAGC CAAGGTAAAG AGCAATTATT TAACTCGATT CCAGTTCCAG TGCCTTAAA
361 ACACACGTGA TTTACGTGAA GATTTACGAA TTAATCATA TGGCAGTGGG TGGGCCAAAG
421 TGTTGGAAAA TGCGCCTCAC GAAGGATGAC CAAATTACGT AATGTAATTT CGGTTTGTTT
481 TTTTCTTTTC TTCTTGAAGA TGTCTGAAGT CGCTACCAGA ATCCCGAAGC CCGTGCTGCG
541 CGGCCTGCAC AATGCCACCA TCAAGCGCAA CCTGATCGTG TCGGGCGTCC TCTGCACCAT
601 TGCCGTCGTT CGGATGAAGG TGATGCACAA CGACCCCAAG GTGCGGGACT ACGCCGATTT
661 CTACAAGTGA GTGCAAAATG GTGCTGCGAG GATTGGTTGC GTGGGCCCGT CCGTTCCTGG
721 TCTAAGTTAA TGTGTTTACA TTGTTTTTGC AGGACCTATG ATGCAAACAA GCGGTTCCAG
781 CGCATGAAGG ATGCTGGTCT GCTGCAATCG GTCAAGGATT AGATACGGCT GCCGCAGCAT
841 ACTTTATTTA GTAACAGAGA GAGAGAGAGA AACAAAGAGA GAGATATGTA TGATTCCTTG
901 GAGACAGTTT GCAGTTGATT GCAATCCAGT ATCTGATGGT AATCGTGCGA TAAAAATAAA
961 TTCCGGTTAA ACCAAACGAA TGAGTAAGGG TTTCCGCTCT CGTGTAAGTG TAACCGGGAT
1021 AATGCTAGTT TGTGGTTGAT TTATCATCAT GTCATCATGG GTCAATCAGT TCAATCTCGT
1081 CTTCTCCACA TCGCTACGAC TATCCATGCA ATTAGGCAAA AGAATCCAGC ACAGCCAAAT
1141 TTGCTGGTGC GGTCTTTTAT TAATTTAGTA ACTGCTTCCC AGCATAGCAA GGGAGTGCTC
```

1201 TAGAATATGT CGTATCCGAC GAAAAACAGA CGTAAGCTCT TGCAAATCCT ATCAAATATG  
1261 TCAAACATTT TTTAGAACAT CTCAATAGAG TGCCATACGT TTGTCTTCCG CGCCTGCCCT  
1321 AT

//

LOCUS 3 1339 bp DNA linear PLN 25-FEB-2004  
ACCESSION 3  
VERSION GeneMark.hmm v3.0 self\_training  
ORGANISM A.gambiae  
FEATURES  
CDS CHR ---  
complement(join(500..630,731..839))  
/translation="MIKLLDRVLSFINYWFRYLMITELYMVESWERVTIHVFLFAI  
FLAQWYFNCKVILPFTGNLLGIQPVDQHIASLTPRS"

ORIGIN

1 ACAGTGACGT TGTCCGGCCA GTTTTCATGT TATCAATATT TCCCACCGTC TCGCAGGACA  
61 CGAGCAGTGG AAGATAGCGC GGAAGTGAAG CTCTCCTGTC ATAGATACAT TCAATACGGT  
121 TGGTATTGGT GGTGATAATG GTACGGCTTC TTGAGCAATT GGTCATCGAT AGCAGCCAAA  
181 TAGTACGGCC TTTTGGTTGG GCTGTTTTAT TCCATTGCTT TATATTTCCA TTCACATTCA  
241 CCAAGCACAC AATAAACACT GAGTGC GGTA GAAAACACAA ACACAAAATG GAATTTTCTC  
301 TTAAGCGAAT TCAGAATACA GAATACAAAA AGAACAGAAA AAGAACATCA GATCCTTGTA  
361 CAGTAGGATG AAAAGTCGAT GAGATTTAAC AGTGGTTTTT AGTTGTCCGT AAAATACTTC  
421 GTAGTGTGTT TCCCTGCGGG GCTACATTCG CTCCACCGCT TTGGGGCTTT CGGGAGGCAT  
481 CATCCTCTTC GCGCATTGTT CAGGAGCGTG GTAACGTGGA AGCTATATGC TGATCCACCG  
541 GTTGAATGCC CAGCAGGTTT CCGGTGAAGG GAAGTATCAC CTTGCAGTTG AAATACCACT  
601 GGGCGAGGAA TATGGCAAAC AGAAACACGT CTACGGGGAG GGAAAACAAA CATGGAAGCC  
661 GAACGTGAAT GTTAATGTTT TTGCTTTTGC ACGATGACCT AATTGGGTGC ACCCCGTGTG  
721 GCATACTCAC GTATCGTGAC TCGTTCACAG CTTTCCACCA TGTACAGCTC CGTTATCATC  
781 AAGTACCGAA ACCACCAATA GTTTATGAAG CTCAACACCC GGTCCAGCAG CTTAATCATG  
841 GTACAGCAGG GATGGGCGCT GAAGGTGTAT GTTTACCGGT GGGCACAGTT TCGTTCTCAC  
901 CGGACGGCTA TGCTGGGCGG TTTTATGCTT CTAGAGTTAT CTATGCACTG TCGAAAGCGG  
961 ACTTGATAAA TTGGGTGTTT ATGGAGAAAA AGGAAGGAGA AATGAATACA AACACATTGC  
1021 CCGCGTTTGA CAGCGGCTGA GGCGAGGTTT GTGCACTGTT GTAAGGTTCT GCGGGTTTCC  
1081 GTTTATAGCT GAGGGTTGAC GTAAAAATAG ATTTAAAATC TCTCAATTTT AACTAATCT  
1141 TCCCATAATA TTACAATCCA GTATTATTTT GTATGATAAA CCTATCTCCA AACAGTTAAA  
1201 ACATATTATG TTTAATTATT TCATTCGCTC CCTGCTCCGA GGCCATTTTT ATTGCAGTTC  
1261 AACC GGCGCA AGTTCATTTT CATTGTTGTT CTGTCCAGTG TGGCCAGATT ATTTTGGCGG  
1321 TTTTCGGCAG GAGCAATGT

//

LOCUS 4 11366 bp DNA linear PLN 25-FEB-2004  
ACCESSION 4  
VERSION GeneMark.hmm v3.0 self\_training  
ORGANISM A.gambiae  
FEATURES  
CDS CHR ---  
complement(join(500..591,9085..9205,10840..10866))  
/translation="MDPRKLYGPSHFNPWPELAYPSWFERARSMGEEHRALLSSPVPG  
SPCDTHLFKCAHFQGLPEHRSPMCLLSTSLSTACG"

ORIGIN

1 AAATCATATT GTTCCACTTT CCGAATTCGA CCAAACCGAA CCAAATGCCT TCCGGGGGGT  
61 GCGTTACTGC GTTCTGTGGC AGACAGCACA GCCACACCAT CACCACGCAA AGACAGCGCG  
121 AACGCCTGTG ACGCCCGTTT CGGGCACACA CCATTTGGCA AGGACCGGAA CAGTTTTTCC  
181 CTCTTAATTT GCACACCATC TGTCGTCGCC GATGTCGTGC AGAGGAGAAG GGCTCGTGCG  
241 TAGTCGTAGC AGGGAGTGGA AATTATAAAA CTGTTACAAG TTTGCTATTG TCCGTTAATC  
301 TTTTCGATTT TTCCCTCCCA TCCGTGTACG TGCGGGCTCA TCTACCGTCG GCTACAGTAC  
361 AGTGTTCGGA TGCAGTTCTT CACCGCCCC CAAGGGAGAG CGTGTCTTGG GGTGTGCTTA

421 CGGTACGCTG GGAGTTACGG TACACAAGTG TCGGGGCAAG TGGATGACAA ATTTGAGGAA  
481 AAATATAAAC GGATTCTCCT TAGCCGCACG CCGTCGATGA CAACGATGTG CTGAGCAAAC  
541 ACATGGGACT CCGGTGTTCC GGTAGTCCTT GGAAGTGAGC GCACTTGAAC ACTTGTTGAA  
601 GGACGGCGAA CAGTTGCAAA CATATTTTAT TACACGCAAT TGAAAGTGTG TGCTTCCCA  
661 TTTGCTCAAT AAAATATCCC ATGAATCTCC AGGAACGAGC GTTGGGCTGG GTGAATCGCG  
721 AATTGTGTTG AAAAACAGAA CTCACACAGA TGCTGTTCCG CTGTGCCCGA ATGCCATCG  
781 GAACACAGCG ACGTTGGATT TTATATTGTC ATTATTTTAC GATTATTTAT CAAACTGTTT  
841 GCCTTCCGAG GAGTGTCTCG CATACTCTCG AAGCACACCC TTTCCAAAAA ATGTGTCATC  
901 CGGCACACAG CAGGAACAGC GCGGCGAGGC GGGAAAGTCTT CTTTTGCATT CCCCAGGGGA  
961 ACGGGAAAAA GATTCCCTAT AGCGCCTTCC ACAACCAACG ACTCGTGTG TCATTGCGAA  
1021 ACCTGGACAG ACAACATAC ATACAAGGAG CTCTGTGATG TGCTCATAAA CGAGCGGTAT  
1081 GGTTATAAGA GTATTAGCAA TTATGATTAC CGATTGCGAT ACCCAACGGG ATTGACTTTT  
1141 CCATCCATCC AGTGTGACG TCGCCGGGGT CAGCAAAGCC GAGCTGAGGA CACACTGAGG  
1201 ACACAATGGG AGACCCCTTT TTGCTTTTTA TTTGGTGCCG GATTTTTATT GACACCTCGG  
1261 TAGCAAAATA TCCGTCACAA GGGAGCACAG TTGTCAGGTC GCTCGCTGGC TCTCTGTCTC  
1321 TCTCGGGAGG GAATTCCTC CTGCCGTGAT AGAAGGATGA TTTGGTGTG TGATGATGAG  
1381 ATTTTCAGCAT GTTCAGGTTT GTATGCAAAC ATTTGGGTCG ATTGGTTGTC AACATTTTAT  
1441 GACCATTATG ATTACGAGCA ATCGTCCACC GGGTGTTTAA AACGGTCATA TAGTGGCCCA  
1501 AGGGTGTGAG CGCTGATTTA AAGGGTTTGG TTGGAGGGAA AACTTTGGTG CATATACAGA  
1561 GACTCTGAGT TTACATGTGT TTCTTTCATA TTTACTAAAC GGTTGACCAT TGAAGAATCA  
1621 ACGTCCGTCT ATCTAGCTAT TTCTCAAATT CCTGTTTCGT TTAATAAAAT GCGCAGTTT  
1681 CAAAGCCTGG TATGTGGAAT TTGCATAGTA TAAAATAGAA AGGAACGAAA AAAAAGCAAA  
1741 GAGAAACAAT ACACAAGCAA TACAAACTCA TAATAAGATA ACAATAATAC AAAACACAGA  
1801 ACAACAACAA TAAAATACAG AAAAATCAAA AAAAGAAGAA CAATAATGCA TAACTCTAAA  
1861 GCATAAGCCG CTAACAAATA AACGAAAATA ATAGATACAT AAAGAAACAA TACAAAGCTA  
1921 AGTAAAATCA ACGCAAAAGT ATTTAGGAAA AAATAGTATA AAATAGCTAT ATAAAGGCTT  
1981 TGTA AAAAATA AGAAAGTAGT CAATAAGAAG ACATATACAA TATTGAAAGT ATCAAAATTT  
2041 TAATTTAGTA AAAGATCAAT CAACAAAAAA TTCAAAAGTG CAGAGAGAGT GTAAGAGCAG  
2101 AGAGAATAGA GTGTAAATCA CAAAAAACCC CAACAACATA ACAATAGCAG CTGGTAAAAA  
2161 GATTTAACAT TATAATCGCT TACAATTTGT TTACAACCTGA CATAAGCAGG CAAGCTAAAT  
2221 GACCACAACG AATAGCAAGG TGTGGAAGG ACCCGCTGTT GAACAGTCCA ATTTATCAAT  
2281 GTCCAGGAGG GATATGGCAA CAAAATTGCG AATGTACGAA AGGGTTAGTC TAAAGGGGTT  
2341 GGAATCACCG AATATCCGTG CTAATCTCAC TTGATCACTG TTATTGCTCG TGTGCCAATC  
2401 CCTATCGTTG GACCAACTGG TATTAATTTA AGTTTGGATT TTTGAACTAG GACTGTCT  
2461 CTTAAATCGC TAGGACCCTC AAATTTAGTG ACAAATGTTT CATTTTTATG TCTAGCTTAG  
2521 GTCTCAGAA ATACTCTT GCTCTGTTGC TGACATGGTC TCAATATCTC AGCACATCAG  
2581 TATCCTTTGT GTAAAGAAAT TGGATAAGAC GTCAATCGTA TGCTATATGG ACCACTTTAC  
2641 TTCCTCAA ACGCTAAAA ATACATTTTT TCTTGAAAGA ATATCTCATT AAAACCATTT  
2701 TGCCTTCAG CAAAACAAAA CAAACTACC TCATCAACGC TCAACATCTC TATCCACCTC  
2761 CATTACACT GCGAAGCTTA TTAGAAGCAA AAATGCTACA CATTCTTCG CCCTTCGGCT  
2821 TCAAATTGTT TTTCAAATGT GATTTTCGCC TGCCACACAT TCTACTTTTT TTCCAAGATC  
2881 TTGCTACTAA GTCCACCGCC ACCACTGGCT TCGAGCTACA GTGTGGTGTG TTTAATGATA  
2941 CTTTGTAAAG CTACCCTTGG ACGCGTCTAA CTGACATGCC AATCTACACA GCTCCCCAGC  
3001 AGCAGCAGCA GCATCAGCAG CATCGTCAGC CTCGCACTAT CCCACGCCAT ATCGTCCTAT  
3061 ACGGTGGTGG AAAAATAAAA ACCCCCAAAC CTATACAGCG CATCTGCGCT TCGGTGTCTA  
3121 CTTTCCCATG ATTTCTTCAT CAGCGGTGCA AAACGGTGTG TATGACAAGT CAAAGATGAC  
3181 ACGTGTGTGT GTATACACTT CGAGTGCGCC CTTTTGCTCC CCACGTTCAA CACAGGGGCA  
3241 GAGTAGTGAG CCGCATGAGC GAAAACAATC GTTCACCTGT CATCTATCGG AACACGACAG  
3301 GGAAATGGTA CTCCTCTGCT CTCCTCCAC CCGCCCCAC AGGAATGCAC ACAGAGTGGC  
3361 CCAAGGGGCA ATTGCTACAA ATGGTCGCTT TTCCGGACGC ACTCCAGGCG GTTGTGTTGT  
3421 GGAAAAGTCG TAAAATGTAG CAATGAAATA CACGAAGAAA CCTCAATAGC TCATTGGCTC  
3481 AGTAGGCTGT ACATTCCACA ACGAAACACC TTGGCAACAC TGTACACAGC CCGGGCTGAA  
3541 GGAGGCCCTA CCAAACGCC GCTTATTGTT TAATTTTCTC GCTCTCGATT GAATCGAAAC  
3601 GAATCGGTAT TCGACATCCT TCAAGCTTCA TTCACATCTC CGCCCGAGCA ACAGATCGTC  
3661 TTCTTCTATC GTGCCCCGAG TGAACCTCGG CCATACATAC ACACGCGCGA GCTTAGACAA  
3721 TGTGTTTCGC AACCCCTTGT ATTACGCTAC CGCCACGTGG ATTCGTTCCG GCGGAAGTTT  
3781 ATTAACACC AGAGCGCTCT AGTCAAACAC AGGCGAGCGT GGCAGCCGTC CGGAGTCCGG

3841 TGCTGGGTGA AGCGAAGGTC TGGCGAAAGG CCCAAAACCG GGGAGGCGCT TACCAAGTGG  
3901 TGTGTTTACA AATAAATTCA AATTAACACA CACGCACCCG GTCCCCTTTG GCAGAGCTGA  
3961 CTTTGCCACG TTCGAAACGG TCAGTCTCGA AGAGGCGTGA AAAACGGAAA ATGCTTCTCT  
4021 GGGGGGGTTT GGGATGCGCT GCTTTCGCTT TCCCATCGAG GGCGCACCGG TTGAAGGATG  
4081 CAGAATCGCA CTGTCCGTCG GGTCGTTGAG TAGGTTGCAC ATACCCAGGT GCAGGTTAGG  
4141 TAAATACATC TTCCCAGTAC CGTCGCTGAT TCCAGGATCT ATCCGACCTG GGCCACATTA  
4201 CACGCGTTGA AACATGGGCG TTGTTTTCTT TGCCTGCTTC TTCTCCATCT TCCACTGACT  
4261 CTGTTTCCCT CTTTTATTGC ACGTGTGCGT GTGTGTGGGT GTGGATTGTG TACAGTTCTC  
4321 CTGGAAATTC CCCCCCCCCC CCCCTCAAAA CCGGAACGGA ACCTAGAATT CGTGAATTTT  
4381 TACGGATGGT CATTGGAAT CGATTGCTC TGGCATCCGC ACTTCGATTC CACATCCCTG  
4441 CTTCCCGGGG GCGGGGCTGC GTACCGCTCC AATTGGTTCC GGTTTCGGTT TCGGCACCGG  
4501 AAAACTCAGC TCGGTCAGCA AAAAGTAGCT ATGAAGCCCT CCCTTCTAGC CCCTTAGACT  
4561 TCTCGTCCG AATTCTTGCC ACGGTTTTCG TTCTGGGTTG TAAGAACGCC AGCCAAGCAA  
4621 AAGTGCATTC GAGTTCGTGG ATTGAAATGC GTTACTTTTCG GGTGGAATTT AGTGGAAGCA  
4681 ATGATACGCA TTAGGAACAT CAGTATCATC GCGACGAATG GAAGGAAGAA GCGTAATAAA  
4741 GTTCCAAGAA AGTGTGAAGT GGAAATGTGT AAGGATTTCC ATCGTCGAGT ATTCACGTAA  
4801 AGATGTTTCT TGTCTTGTCT TGACCTCACC ATCGCTTGTA GATTGGCTTT AGTTTGGCTA  
4861 TAAGATACAC CGAAGGCCAC TATATGTATT ATAACATATT GAAGAATCTT TGTCTCGGTA  
4921 GCTCCATTGT AAATCGTAGC TGCCTTTGTA GAAATCTTAG ACTTTGAACG ATAAGACATC  
4981 ATTAGATTAC GAGATATGTC AACTCCAAGA TGCATCAATC AGCTTGTAAT CTTTAAGTTT  
5041 AAAAAAAGAG TAAAGATCAT AATCAGTAGA GCCTTTGGAC GAAGTTGTGA AGGTGTCACA  
5101 CACATATCCC AAATAACGAC TTGCTGTAAA CCACCTTCAT AACATTTTTT ATTACATAA  
5161 AATTACATTG AAATTACTCC ATTAACCCAA CGTGTACACG TCGGAACCTT TCGCAACGAG  
5221 CAACCTGGTC AGCAATGATT GCCTGTGATT CAAGTCAAAC CCCCTATTTT TAGTAAAACA  
5281 ACGACACAAA TCCTTTTTTT AATCGCTATA CAGTCCTGCA CCTGTCCATA CATAACCACG  
5341 TCCACCAAGT GCAACCATAC CGTGCCGTAT ATATTCCCTA TGCACCACCC GCACCATTGC  
5401 ATGATCCAAA CGCGTAACAA ACTATCGCAT CGAACCTTTC CATCGGGAAG AAAGAAAACA  
5461 GGGCCCGCGC GATGTCAGAG TGCACCTCGT GAGCACCTAT CAATCAACAA ATAATTACTT  
5521 ATCAATCATA GACGAGGCCG ACACAGACAC TCAAGAGAAA GAGAGATAGA GAGAGACACA  
5581 CCGAAACAGA GAGTTCGAAG GATCGCACCC GGAGTTGTTG TTTGTTGTTT GTTGCGATTG  
5641 CGTTTGTTTT TCCCCGTGCG TTGCGTAGCC CAAGGCACAA GCTAAGGGAA AGCTCATGGC  
5701 CCTCTGCGTG TGTTTTTTTT CCTAGTTTGC CTTTCCATTC TAGCCGAAAA CGTCTGGAA  
5761 AAAAACGCGAG AAACCCTTCA ACAGCAGCGG CGTAAGGTGG GCAAAGCAGG AAACHTAATTG  
5821 CGCACAATTA ACTTGTGCTC GGTGTCATTT CGGGAAAACA ATTCCGGAAG CGAGCTTGAA  
5881 TATAAAAATA CACACAAA CAACAGCAC AGAACGATAG TCGACAGTTT CTGTTCTAGA  
5941 CAGGCCAGCG TTTTACTTTT CAAGACAGTT CCGATTCCGG GCGAGACACA TACAAAGGGA  
6001 GGGGGAGGAG GTAGACAGGA AAGAAAAGG GAGCACAGTA TAGCACATAA AAGCCCATCG  
6061 GGGCTAACGT TCCGTTGACA TGCAGGTGGG CAACCGGATC GGTTACGCGG GCATATAGCA  
6121 CCACGCGCCG TGTGCTGGGA CATGATGGCT GCGCACACAT TGATGTTTTG GTCCCCACTC  
6181 GCCCGGGTTT TGCGGTTTGC TGTGTGTGTG TGTGGCTGTT CGATGATATA CGACGATGGA  
6241 TAACGGCCTG GTCGTCCGAT GATATGTTCC GGACGTGACG GCATCAACCT TTTACCACGA  
6301 GCCAGCACAC CCAGGCCAGG CCACCCAGGG AGGGTGGGTT TGGTTTGGTC AGCTGGCCGG  
6361 GGCGGTATTG CGGTATTGCT ACCGGGACCA GAGCCTGCGC CTGCGGGTCC CGGCCACAAA  
6421 CAGTGTGATG TCTGTCATAC TATTGTTGCT ACCGTTTTTTG TTGCTGTGGC ACAGTACAGT  
6481 GGTCGCCAGA ACAGTGGGCG CTACATTCTA GGGGTAGACA AAACGTGGTC GGTATATTA  
6541 AAGTGAACG GAACTTCTAG TTGCATCTT TTAACTACTT CCAGATGAAT GGAAGTTCTA  
6601 GATGCACTCT CTTTCTCTCA AAAGGTCAAT ACTAACACTC AACACATTGT TACAATTTCC  
6661 CAAGGATTTT TTTATACGCC ACAAATAACG CAAAAAATCC CGTCCCCTCC ATCAAAAACCT  
6721 CGAAAAGAAA TTAATCTTGG TCACAACACA CACACTCAAC GTACAATAGT ACCTCTGAAT  
6781 TACATGAACA CAACCACGCA CGCATCCTTC ACATGCCCTG CTGCCACTAT TGTGTCGCTC  
6841 AGTGTGTGGT GTCTCCAGTG TCTGCCCCC CCCCCCACC CCCCCTTTGC GTTCGGCTCT  
6901 ATCAGTCATT CCGTTCGAGC GCTCTTGCTT GGCAGGTGCC ATTGCCGCTT CCTTGCTGCC  
6961 AGTCCACGGG CTCGGGACGA ATGAGAAATG GCACCACCGC CTGAAGGGAA ACGCGTCGAT  
7021 CATTGAACAT CGATGAGCTT CTGGTCTTAT TTGTCCGCCC GTTGCCCCTG TTCCATGCAT  
7081 CGCGCACACG GTAAGAATGT GTTTTCTCTG CGGTCGTCGT TTGCGTTTAT TGCAAAACGT  
7141 CGAGGCGCAA CAACAACAAC AACAACAGAC CGCAACAGAC GCAGCCACAT ACGCAACGCC  
7201 AACGCCATCT GTCTTTCACA TATGTAGCGT CCAAGAAGGG GAAGAGTTTT GTTTTCCGCA

7261 AAAGAAGAAA ATGATTGATT TTCTTCAACA ATGAGTCGTT CTTTCTTTTT CATTGTCCTT  
7321 CAGCTTCTTC AAACAGAGCT CCGTGTGGT TGGCACGATG GTTGTGCCGT GTGAATTAGC  
7381 CATCGCCACG CCAAACCGGA GCAAGGAAGG ACATCTTTCT CTCGCTCCGC CGACACGCCG  
7441 CCGAAGGAGA CGGTCTCCGC CCGCCGCCAA AGTAGTCCAT GAATGATGGA CCTCTGTCAC  
7501 GCCACGCCGG ACAGCCGACA GAGAGTGGTG GGGAAAACCT CAAACAACCT ATCATGTAAG  
7561 CTCGTACAAT GTAGGAGAAA GGTGGTGGTC TCGGTAGGCG CTGCTGTGCA GGTAACCCCA  
7621 CCTCCCATT CGTGACATAG GCCAAGGTAG AGGTTTGTTA GCACGCAATC AACACCTTCG  
7681 CCACTGTCCT GAAGGATGTA GTGCGCGGGA CCAATACAA AGCGGGACAA TACAAAAGCA  
7741 GCCACGTTTG GACATCCGCG CTAAACACTG TTTTGATTGT CATCGAAAT GTTTGGACAA  
7801 GAACAGAAGG GAAGAACCAT CCCGGACACC AGTCGTAATC CATTCCAGTG GTTGTGTTAA  
7861 TGGGTTGTAG TTTGTACATG TTCCGATTCA TTTGGAATCG ACACCAATC AAACCTGGTT  
7921 AGATAGGGAT CAGCAGGAAA CTCCACAAAA AACACCTTAA TTA AAAATGT TTGTTTTTTA  
7981 CTCGTTTAAA ACGACATTCC GTGTTAAGCT GCAATAGCGA TTTATTTTCC TTACGAAGGA  
8041 TCATGTCGTG TACGCAATGT AAGTCCAGAT TAGATTGGAC TTA AAAATTC A TGTTTTATT  
8101 TATTCAACCT TTCTAAAACA ATCTCATACT CAAGTTAACA TTCTACAATG ATTTAAAACA  
8161 AACTCAACCC CTAATCGATT GAACCGTCCA ACGCAAAAAC CCACACTGAA GGCTAACTTT  
8221 TGCATTTTTT GCACAAAAAA CCGATTACTG CACCCGACCC CCACCGATTA AAGCGGAGAG  
8281 TTGTTCCGCA AAGAGTTGTA ATGCTCCAAA CTTCTCACAA CTTCTGTGCA CCAACAGCGT  
8341 GTGCAAACGC AACAGGTCAA CCGTTAGCGC TGACCTTTTC AACGGCAAAA CCATACGCGA  
8401 GCATATTA AAA CGAGGCAAAG AGGGAGCAA CTTCTTTATG GCCATCGCGC CCTCGTGTG  
8461 GGGGGTTTTG CTCTCCAATT AGGCCAACGG GCGCGCGCCA AGGGGTTTTT TTAGTGACAA  
8521 CCGGTTTTTC TGAAACCGGC ATGATACGAT TGCTGCTCGA ACAACTATCA TTAGAACGGC  
8581 ACACCACCAT TTTGCATCGG CAATTTGCTC GCGCTTATTA TGATGTTTAA CTTCAACACC  
8641 TAGAAGCTAA TTGACATCTT TACGTTAGAA CCACTTAATA TACAGGCGCT CCGGGGCGCTG  
8701 CCGGATTGTG ACCGTGGTTT TCTCACGGTA TAATTTTTCC ACCCCTCCCA ATCGTTTTATT  
8761 TTGTAGCTTT AACACACACA CATGCACCAG CGGGGAAGAT TAAAGGTAAA GCTTTATTAT  
8821 AATTA AATTT TCGCAAAAATA TCGAAAACGAA AGCGAACGCG GGCGGCACAT TTTAAAGCGC  
8881 GCATAAAGTG TGGCATCAAT CTTTACGAGC GGTACTAATT TTGCTTTACT ACACCAATTT  
8941 CCACCAACGT ACAACAGCCC GTCCGCGCAC ACTACTAAGG CCAGGTCGGG GACAGTGTTC  
9001 TTTATTAGTA TAACGATCAT CATCATCAGT TCATCGTGTT CGACATAAAT CGCGATAGTT  
9061 TTGCAGGGTA ATTAACCGCG TTACGATGCG TATCGCACGG CGAACCAGGG ACCGGCGAAG  
9121 ACAGCAGAGC CCTGTGTTCC TCGCCCATGC TGCGTGCCCG TTCGAACCAG CTCGGGTATG  
9181 CCAGCTCGGG CCAGTTGAAG TGTGACTGCA AAATTTGTAC CGACACTTGT GCCTCTTCCG  
9241 TGACGAAACG AAAGCGGCGA GAGTTTCTTA ATACAACCAG AAAGGGTGCA AAAGAATACC  
9301 CTTCAGTGCT TCAATCCACG GCCAGATTCA CAAGAATGCC ATAAAAAATG CCGCTCCGCT  
9361 TTACCGGTAC CCTGGGCCGT ACCGAAATTC TAACTCCCGA AGGAACCTTT CCCCCGGTAG  
9421 CATTCCCCAT GGGAGTCCTT GCTTTTGTG CTTTGTGGA AGGGATTTGG CCTTTGGCGC  
9481 ACAGATAACA TTCAAATACG ACGCATCTGT CATCATTTAA ACGACACTAA ACAAACACTG  
9541 CACCACCTTC TGGGGGAGGC GAATCTCGAC CACGCTCTGC GGGTCCGAGG AGTTTTGGGT  
9601 GTGGGTTGAA TGATTGATAC GCGATACAG GTGCGTGTCG GACGGGCGGT CGGTTGGTCC  
9661 TGTGTCCTGT CCTGTCCCGC GTTCTGTGCC CGTGATAAAG CTTTATCAGG GTACGGCCAC  
9721 CATGCCACCA AACGGCTGCG CTGTCTCCTA TCGACAAGTG GCCCCGACAG AATCGCTCGC  
9781 CTGCAACTGC TTTAATCGTT TTCGCTCGAC CCCCTCGGCC GATGAGAATG CGAACGATTT  
9841 CCACCCCTCT GTCCCTCACG CGTCACCACG CACCACGTCA GAGAGCGAGC AGAGTTTGGG  
9901 TTGCAGGGAA GGAGAATCGT AGTAACCGAT GCGTGGATAA CTTTTTACCG ACGTCAACAG  
9961 CAGTAATCGA AGGATGGGAG AGGATCGGCA GAGGAGGTAA CACAGTACCC AAAGGGGATG  
10021 ATGATTCGTG CGTGCAGGC AGTTTACCAT GGGTTGAGCA AAACATGTG TTGACTTGTT  
10081 GTTACAGTGC GTGCCGAAA AAGGGGAAAC GTATGATAGG CTGATGAACA AGGATATCAT  
10141 AGGTAAGGGA AGGGAAGGTA GTAGTAATTA TAAGGCTTTT ATAATTTAAT ATTAACCAA  
10201 AAATATCTTT TCAAGGATAT TTTATGAAAT GCATACCAA GTTAACA ACT TTCATGTGGA  
10261 ACTTTACGGA GCTACAGTGA TATTTCCCA AGATGTATCT TCAAGGGACC GTCAGCTTAG  
10321 AGAGATTTTT ATGTTAAAGA AAATAATGA AGCTGGTGCT ATGAAGTATT CAAGAAATCA  
10381 CGAAAAAAT CTGACATCCT TTTACCTATA TTTGTGTGAA CTATCTCTCA ATATTCTCT  
10441 AGGTTACTAT ACGCTGTCGA ATTACATGTG CAACTTAGAG TATATTACC TAAGGGGATA  
10501 TTCATCTAGA AGAGCCACAA AAAGAATGGA AGGTGATAGG ACCGTCAAAA TGTTAATCTT  
10561 AAAGAAACAA ATAATCTTGA TCATACTCCA TCTGAGAGAG ATTTCACTGT AATTAGTTTT  
10621 GACAAACTAC AGAACTAAGC AGAAAAAAT CCGTCTGTGT ATATTATAAC TCCAGGATGC

10681 TGAGTTACAG GATAAAAAAA TGAGTTCTCA GGCTTCTTTG CAATCCACAG GCCTGTTTTCC  
 10741 AAAGCATGAT CCGAAGCAAA ACTGTTCTTA AGCCCATATC GGTTTTGGCA CTGATCCTAA  
 10801 ACCCAAACCA ATACTGAAAC TGTTCTTTAA AACTAATACC GGGCCATACA ATTTTCTTGG  
 10861 ATCCATGTCG CTTCTTAAAC TGAACCTCAA TAAATATAAA TAAATAAATA AATAAATAAA  
 10921 TAAATCTGCA ACCCATACTC GCCCAAGAAC TGATCTTGTT ACCATTATGA CACTGATACT  
 10981 GAGCCCATAC CAGCCAAGGA ACTGATACCA AATAAATATA CCATTCTTGG ACCGGATCCT  
 11041 GAACTCCAAT ATTCCTTACT CCAATACCTG AATTCTGATT TTTGACAACG AAATTGAGAT  
 11101 TTTTCTAACT GGAAATTACG ACGAATTTTA TCTTTCATCA TATACAGTGA ACCCTCTCTT  
 11161 ATTTGACACC TCTCCAATTT GAAAAACCT CTCTTATTTG AACATTTTGC ACAGTCCTTG  
 11221 ATTTCCAGTA CATTTTTGTT CCTCTAATTT GGAAAACCTC TGAAATCTGT GTCCTCTTTA  
 11281 TTTGTGTATG GTGTTGGCAT GGTTATTGAA TGATGTATGC TCAAATTGGC AATCCTGTTC  
 11341 GCAGTTTCCT ATAGCAACAG TTAAGG

//

LOCUS 5 1349 bp DNA linear PLN 25-FEB-2004  
 ACCESSION 5  
 VERSION GeneMark.hmm v3.0 self\_training  
 ORGANISM A.gambiae  
 FEATURES CHR ---  
 CDS complement(join(500..709,808..849))  
 /translation="MSEQRRRVLDLYKRLQYMGREYPPGGPEKFRQRCYNAFKRQSTE  
 TDPEKIEKAIGLGEYVVKEIEALYSLRKYRAMKRRYYDEK"

ORIGIN

1 GCCTGTTTTT CGAATGATTA TTTTGTCAAT GAACAACAGG ATGTTAGAGA CACTATGCAG  
 61 GCGGGGATTA ATTAACGTTG TTACCTAATA ATGCCTTTAA AATTAACTAT ACTAAAACCA  
 121 TTAAGTTAAT TAGCGTTTTA AACCAATGGT TATAGGCATC CATTTAGATA GGAAAGTTAC  
 181 ATTTTGTGTG TTTTATTTGT AGTTTGTCTC TAAATTTTCT AAAAAACTG AATTAGTAC  
 241 TGCGGTAGAA AAAAGGGAAC CATAAACTTT TCTCGTAAAC TCGTTTGTG CGTTATTGTA  
 301 CCCCACTAAC GACTATTTAC ATCGCCTCCT GTTGTAAAGGA CTACGGTCAA GCTTCCACCT  
 361 TCGCAAAAAT TGCTGCCGCC CAAACCTCGG ACCCTGCCAT TCTAAGGTCA TACCAATAAT  
 421 CTCTCAATTT GTTATCAACA GCAGCAACAT CAGCGGCGAC GGCGGCACCA TCTCCAAGCG  
 481 TATGGTGTAC CGTCTGCCCT CACTTCTCGT CGTAATATCG TCGCTTCATC GCTCGATACT  
 541 TCCGCAGACT GTACAGTGCC TCTATCTCCT TCACCACGTA CTCGCCCAGC CCGATCGCTT  
 601 TCTCGATCTT TTCCGGATCG GTTTCGGTGC TCTGCCGCTT GAACGCGTTG TAGCACCCTG  
 661 GGCGAAACTT TTCCGGCCCA CCCGGATACT CGCGGCCCAT GTACTGCAGC TAAGGGATAG  
 721 GATTGGATGG GAAGAAAGAG AAGCGCTTAA TGTTACTCTA TTGTTGCCTC CCACAGCACT  
 781 GGGTCCTGCA CTCTAGAATG TTGTTACCCG CTTGTAAAGA TCCAAAACGC GTCGCCGTTG  
 841 TTCGCTCATC GTGTGCAAAA AAAAAACCTT TGGCACGGTT GTTGCGCAA ACTGAAACCA  
 901 CGTAAAACAA CAAACAAATA GCAGCCAGCC AGCCAGCTCT CGCGCTCTCT GTGTGTAGTC  
 961 AGCTGTCAAA AGTGTTTTGC TGATGCGCGA TGGCACGTAC ACTACCGTAC CCCAGGCGCA  
 1021 CCAGCTGATT GAAGGGGGCA TGTGTGCGTG TGTGTGTGTG TGTGCTGTGT AGTGTCCGCC  
 1081 GCTGGTACCA ATCGTAGAAG GCCGGGTTGT TGTTAAACAA AGCGCGCGCG TTGCCACAGC  
 1141 GAAAATGAGG GCGACAAGAG TGCGGTGCAG TGGCGGCAGC AAACCAGCGC AAGTTGTGAA  
 1201 ATACACAATT ACAAGTGCAC AGCAGCGGCT CTCGGTCGGG TTCTGGCAGC GCAGCGTCTC  
 1261 TTCAAAGATT TGCATTGTGT CGAAGGAGAA AGAGAAAACGT TCATCTTTTC ATCCAACATC  
 1321 CAACCATCAT GGAGCTGCTG ACGACGATG

//

LOCUS 6 1350 bp DNA linear PLN 25-FEB-2004  
 ACCESSION 6  
 VERSION GeneMark.hmm v3.0 self\_training  
 ORGANISM A.gambiae  
 FEATURES CHR ---  
 CDS join(500..629,714..850)  
 /translation="MWPLIMQFMRSNAAYITLPIATLVGVIGYNIESLLSDKYTPYS

PSIQEKRAERITDDERLKAATDVEKLVYKENVLGRNLSPSLEK GK"

ORIGIN

```
1 GTATGAGCAA GTGAGACGGC GGAGCGCAGA TGCTTATTTG TAGGATGTAG TACTCCGTGA
61 GGTCAATGAG GGGCGGGGAG GTAGTGGAGT GTATTAATTT TTTTGGCCAT TTAATTTTCGT
121 CCACCAACAC AATGGCACAC AAGCGCGAGC ATTTTTGGCT GCCATCTTAA ACCTTCAAAA
181 ATCCTCGCTC AAAACATCAA AAACCGTCAC AACTACTTAC AAAAAGCATC GCCAGCGAGG
241 GAAATTCGCA CCGAATTGGA GCGTTGGCGA GCTCATGACA ACCGGTTTTT GGCCTGCGGG
301 CCCACCAGCT GATTGTCAAC AAACAAACGT CAGCCACAAA CCGGATTGAA ATCAAAACAA
361 ACCAGAAAAC AAAAAAAGGC TATTTTCATCG TAGGTTCGTG TTCGCAAAAG TGTGCGAAAA
421 TATTTAATTA ACTATTCGAT GTGCTTCTTT TCAGTGCTTA ATTATTTCTA AACCATCAAG
481 CTAGCATTAG ACGCGCACCA TGTGGCCACT GATTATGCAA TTCATGCGGT CCAACGCTGC
541 CTACATCACG CTCCCGATAG CCACATTAGT TGGCGTGATA GGGTACAACA TCGAGAGTCT
601 CCTTTCGGAC AAATATACTC CATAACGCCG TAAGATAGAA ACGCTCCTGA ACACCTACAT
661 GAATTTTCAGT ATGATGCAAA TGTTTAGGCT AAATCTACAA ACCCCATTTT CAGCTTCCAT
721 CCAGGAGAAA CGAGCAGAAC GAATTACGGA CGACGAAAGG CTGAAAGCGG CGACCGATGT
781 GGAAAAGCTA GTCTACAAGG AGAACGTACT TGGGCGAAAC CTGTGCGCAT CGCTGGAGAA
841 AGGAAAGTAG AATTAGAAAG AGCTGCTTGT TAAGTTTGTA GTCGTACGAG GAAAATATGC
901 AATAAACCTG AGCGTCCATA ACAAGGCAAA GGTATGTATG TGTGCGTTGT ATATGTAATA
961 ATTATTTATG AAAATACAGG GTTTCCACG ATTTATTGGT TGGTTCCAC GATTTATTGG
1021 TCGGTTCCCA CGATTTTTTG GTCATTTCCC ATAATTTTTT GGTAGCAACC CACGATTTAT
1081 TGGTTCGGTT CCAAATATTA TTGGTCGGTT CCCAAATATT ATTGGTCGTT TCCCAAATAT
1141 TATTGGTCGG TATTATATTA TATNNNNNNN NNNNNNNNNN NNNNNNNNNN NNNNNNNNNN
1201 NNNNNNNNNN NNNNNNNNNN NNNNNNNNNN NNNNNNNNNN NNNNNNNGGG AGAATGAGAA
1261 ATTATCTCTT GAATATATGT TCTTCAATTT CACAATTTGC TGAGAAGATT TTAGAAACTG
1321 TCATAACAAC CGCTGTATGA CAGAGTGGCC
```

//

```
LOCUS 7 1350 bp DNA linear PLN 25-FEB-2004
ACCESSION 7
VERSION GeneMark.hmm v3.0 self_training
ORGANISM A.gambiae
FEATURES
  CHR ---
  CDS complement(join(500..604,686..850))
  /translation="MSATLVNIAEEDFFGTVIRYGLYVGAI FQMVCLAACIVLPDSS
  GGSGEPPGSWSPKNNDSESSSEHSSPQNTPRRPYHRSRKQDKKKRR"
```

ORIGIN

```
1 CTGTTTTGTT ATCTAACGTA CTTGCCCGTT CGTGGGGAGT ATGACGTTGA CCTGCCAGAA
61 AAGGGTGCAA TGTGTTATGT GTAAAGTTAA TGAAAGAAAC TGTTTTCTTT TGCAATATAA
121 AGTCTTGAC TGGTAGACGG TGGATTTGTA AATGCCTTTT AACATGTTTG ATTTTAAATT
181 TCGAATATTG AAAGAACTAA ACGCCTTTGG TTTGTGAAGT TAAATGTTTT ATAAGTTGAC
241 AATAAGTACA CTGTTACATT TAGTCTCGGT TGGCTAATGA GTATTTTGTT TCACTACGGG
301 ATGGTAGTAG ACGAAGATCT CGTTGAGCTT CCTATCGCTA AGTACGCAGT GGTATCGGTC
361 ATTGCCGAAG TCGCCCGATA AAATATCGAT TAAAAGCTAG AGAAGGGACA AAACATCTAA
421 CACATCTCAG ACTAGCGTTG GAATGCTATT AAAGTAGATT TTGCGTGGAA AGTGATCAGC
481 AAGAGTGAGT GCCAGCAGCT TAGCGGCGCT TCTTTTTGTC CTGCTTGCGG CTACGGTGGT
541 ACGGTCTTCT GGGAGTGTTT TGTGGCGAGG AGTGTTCCGA GCTAGAGTCT TCGCTGTCGT
601 TGTTCTGAAA GCAGAGGAAC GAACCAATT TGTTAAGAAT CAAACTGTCC ACTGTACTGC
661 AAAAACACAC ACACACACAG CTTACCTTCG GTGACCAACT TCCCGTTCA CCACTGCCAC
721 CGGACGAGTC GGGCAGGACG ATGCACGCTG CCAGGCACAC CATTGGGAAA ATCGCCCCAA
781 CGTACAAACC GTACCGAATG ACCGTGCCGA AGAAGTCTTC CTCGGCTATA TTCACGAGCG
841 TAGCGTCAT TTTGGTGTG ACAAAGTGG GCGGCCAAAG ATTTGCTTTT ACCCTTTGGT
901 GAAAGAATCG ATATCGATTT GTTTTGTGTT GCGCACTGTT TACGCCAAAT CGATTCCCAA
961 AGAGCAATGA TGTCAGCAGT GTCTGCTGGA TGGCAGCACT GCTCGAGGAA TGTGCGACAA
1021 AGTTGCCGTT TGAGCAGCTT ATCCGACACG CGACATCCGA CATTGAGCAA AGCCGCAACA
1081 TGCTTGTTGAA TTGATGATTT GTTTTTACAA TGTATAAATA GAGAAACGGA AAACAAAGCA
1141 CTGAAAAGTA TAATTTTACC GAATGAAACG GTCAAATTTT TGCTCGGCCA ATGTAAGCAA
```

1201 AACGCGAGAT TTTCTACAAG ACCACACATC CTAAGCGCCA CAGATTATCC AAGTGCCACA  
1261 AATCCGCTAA ATGAACACAA AATGGATTAT ACACGGCTCA AGCTCTCAAC CTAAACGGAA  
1321 TATAGAAAAA ACTTCGTTTA GCAGACGGCA

//

LOCUS 8 1477 bp DNA linear PLN 25-FEB-2004  
ACCESSION 8  
VERSION GeneMark.hmm v3.0 self\_training  
ORGANISM A.gambiae  
FEATURES CHR ---  
CDS join(500..545,618..706,816..977)  
/translation="MADEDKGLVAGHPPAVKAGGMRIVQHKTPNSERPAKDPVEVIG  
LSNPAPNVNTGEVAQSGTSTKHTDHSVEASQVAHAQKPPAPVHSKPVNHIQQPRK"

ORIGIN

1 ACATTAAATT CTGTGCTAAT CCTTTCTAAT TATACGATAC TGTAATTTAC TCCAATCGAA  
61 AGCAAAAAAA ACATCTACGC CTCCATTTTC TGTTCTCGGG TTCTGTTTTT CTTCCCCCTC  
121 CCACAAACAC ACACGCACAC ACGTATACAC ACACATACAG TGCGCTGTAT TTATTTTGAT  
181 TTCTATTCCG CGCTTCGCAC CGTTTCTTGC CTTTCGTGGAA CGGTGCTAGT TGTCAAAAAG  
241 AGCCCCCACC CCTCTCACAT CGCATCAACG CCATTAGCGC TCGTTCTAA TCTATACGCA  
301 GCAAAATTGT AGGCCCTGTG TTTGTGTGAT CGCTCATATA TTTTCGGAAC CACGACGATA  
361 GATAAGAGAT AAGCGCCCGT GATCGTGCCT TGGCAATTCG AATTCAGTTT TGTGGGGTGC  
421 ATTTGAGAAG CGCAGCAGCA TTCGCCGCAA GGTAAACGCG TAGTAGTAGT TGACGCAAAA  
481 GACGCGCAGC ACAGAAACGA TGGCCGATGA AGACAAAGGA CTGGTCGCTG GACACCCCCC  
541 GGCAGGTAAG GCGCTACATT TGCTACCTTT GCTGGGTGGG AAATCTAATG CACACGTTGC  
601 ATCTTTTTTT TCTACAGTGA AAGCGGGTGG AATGCGCATT GTGCAGCATA AGACTCCGAA  
661 CAGCGAACGG CCTGCCAAGG ATCCGGTCGA GGTCAATTGG CTGTCCGGTAA GTGGTGCAGC  
721 ATCATCCGTG TGGGGGGAGG GGACCGTGTC AGTAGGTTGG GAAACTGGTT TTGTGCAAAC  
781 AATTAATTCT AACTCACCTT CACTCCCTTC CGCAGAACC AGCGCCCAAC GTGAACACGG  
841 GTGAGGTTGC CCAGTCCGGG ACGAGACCA AGCATACCGA CCATTCCGTG GAGGCGTCGC  
901 AGGTGGCCCA TGCCAGAAG CCGCCGCGAC CGGTCCACAG CAAGCCCGTC AATCACATCC  
961 AGCAGCCTCG GAAGTGAATT ACTCGCGGTG CATGCTATTG AACCAGTGGG GCGGTGCGGA  
1021 GTGGAAGAGG GACGGAATG AACCAGCAGC AGCAAACGAC GACGCGGTGG GGGGTCAAGG  
1081 GGACAAGGGT GTCCGCCGGA TGCACGTGCA CATTGGCAGG TCCAATTCTT CTGCGCCCCC  
1141 TCAGCCGATC AATTTGCCCT GCTGGAACGT TTTCCGAGTC CGTGTTCGGC GAGTGATGAT  
1201 GGCCTTATCG ATAATCAGTA TCAGGGCAGA GTGTTTTTTC AAGTTTCTTC TTCTTTTTTT  
1261 CTTCTACCA TCATCGGTAG ATTGATAATT GTCTGAATTT AGAGCGTTGC TTAGCGCGCA  
1321 CACGTTGTTT TTCTTACCTT CAATTTACAC GGAATTTACA CGGGAGAGCG GTGTTGTGCC  
1381 TCATCGAATT GAAGGCGTTG TAACATTTAT AGTGGTCTTG GTTTAGTTTT CCTTTTCAA  
1441 TTTATAATTC TACTAATATT TTGTAATACT GTTTGTG

//

LOCUS 9 1532 bp DNA linear PLN 25-FEB-2004  
ACCESSION 9  
VERSION GeneMark.hmm v3.0 self\_training  
ORGANISM A.gambiae  
FEATURES CHR ---  
CDS complement(join(500..541,624..772,845..890,961..1032))  
/translation="MADEFDACECFWSHELAMRRLMSLLRQGQSYCNDNECTDLPSL  
PNVTGGANFFLIVMALIFVAVMYVLRPSSMRRSNDLNKSLPPPSNDGPNNDDGGAPPS  
IS"

ORIGIN

1 AGTAATCACA ATATGCATTA TCTGCTCGCG CACAGCCTCT AGGAGACCGG GGCGAAGCGA  
61 TGTGGGGTGT TGGGGTGGGT TGGAGAGAAG GAATTTACTT TGAATTGCTT AACACAGCTG  
121 TTGGCCGGTG GTTGAACAAA GAAGTGGGAA GGTGCAACCA AAACGTTACA TTTGAACTAT  
181 ATTAGTGATG TATTGGAAGA AAGAATACAG ATTGGATCAT TGAAACGCTT CCGGGAGGGG



```

241 TGTGTGTGCG CACGGGTTGT CGTTTGTGTT TTTTGC GGTA AAAAAGGAAC GTGCCCCCGA
301 ACGTGC GTTT TCCATGTGTT GTATAATTGT CTAGAAGAGA AGCGGAGAGC GGGAAATGCG
361 ATGCAACATT CGTCCGGAAC CGTACATACA CCTCCAGCCA CCACCGCGCA GTGTCATTTG
421 GGATGGGGGA GTGGAAACAG GCAGCAAATG CTCAGGTTTCG GGGTTGTGCT TTTCGTTGGC
481 CGCTGAACGT GCGCTCCCTT CAGGATATCG ACGGTGGTGC ACCACCATCA TTATTCCGGAC
541 CCTGGGGTGG GGGGAAAGGG CACGAGTAAT TAGAACAAGC ACGAGAGGGG GAACCAGCGC
601 CACCAGGAGC GCCAAATACT TACATCGTTC GATGGAGGCG GCAGCGACTT GTTCAGGTCG
661 TTCGATCGTC GCATGGACGA GGGTCTCAGG ACGTACATAA CGGCCACAAA AATCAGTGCC
721 ATGACGATTA GGAAAAAGTT TGCGCCACCG GTTACATTCG GGAGACTGGG AACTGGTTGA
781 AAGAGCGGGG TTTTAAATAG TTAATTATCA ATTTAAGAAG TTATCATTTT CTCACTATAC
841 TTACGATCGG TGCATTCGTT ATCGTTGCAG TACGACTGTC CTTGACGGAG GTGAAAATGA
901 TGCAACACAG GCTGTAGATA ATGCTTCACT AACGGCTAAA CTCTACAATT GTATACATAC
961 CAGCGACATC AACCGTCTCA TAGCGAGCTC ATGGCTCCAG AAGCATTTCG ACGCATCGAA
1021 CTCGTCTGCC ATTTTTGCTG CGCCTTTGCT TAGTTACTTT GAAATTCGTT CAACCGTTTG
1081 CAACTAACAA AACATCAACG TCAAAAACAC TTCCAGGCCA AACGCGTGTC TATTCTCCT
1141 CGTACACTGG ACTGTTTAGA ACTGGACAGA TTATAAAACG GCTTCTGGTT CCTTGCTAGT
1201 AGTATCCCTA CAATGACACG AATGAAACAA AACATATTTA ACATAAATCA TTTTCATCTC
1261 TTTTCGTTGC AGATCCGCGG CGCGATTACT TGGATTGGAG AAAACTGTTC TAACTAGCCA
1321 CAAACTACCA CTTGCGCGAG TACCCGAAAC AAAGCGCGTT AACGTGTGCC TCCCACAGCC
1381 ACTCGTATTG GGCCGTTGGG AAAATGCAAC ACAGCAGCCG CGGGTTTTTT CCACCCACTA
1441 TTCCCCCCTC AGAGACCACC TGTGTATACG ATTCCGTACC GAATTGTAAA CACTTACGTG
1501 GTCTTCTCAG ATTTGCGGCG GATGCGCTGT AC

```

//

```

LOCUS          10      26339 bp      DNA      linear PLN 25-FEB-2004
ACCESSION     10
VERSION       GeneMark.hmm v3.0 self_training
ORGANISM      A.gambiae
FEATURES      CHR ---
              CDS
complement (join(500..526,616..705,7922..7953,17779..17876,24276..24317,25802..25
839))

```

```

/translacion="MSLTPSPMRAPATYPVLDVKSLNLIIRHIPTNRS AHFDFVRQN
HQISPM PN IARKIHIDDVHHIVLSRDHLCPTETMLVHQSLPPTLLCYAHEDEQQYLK
TVASSPFG"

```

ORIGIN

```

1 CAACGTAACG AAAGCTACAA CCATCTTTTT GTCATACACC CTCATTCATT CTCATCCAAC
61 CTTTGGAGCT CTATCAACTT TTGAAATTTT CACCGGGATT TATTTTTTTG ACATCGCTTT
121 TGACAGAAGC TTTAGACTTC TTGAACATAA TTGTTTCAGGT TGGA AACCAG TGGTTTATAT
181 TAGTTCCTGT ATTTAGTTGT TTACCCGCCA TCAAAAATAA GCGACGCGTA GCTAACTCTT
241 GAGAAATAAG CGCTTATCGC ATTTACGATT ATACTGAAGA TGGAATAATC ATAGGCAGTG
301 AAATCGGATA GAGTATACAA AACTTAATTG CCTGCGTGTC GCATTT CAGA ATAGACCGGC
361 CTACACTACA AAAACTGTGC AGCCAAGGCT CGTGAATTGT CATGGACCAA ACGTCCATTG
421 TCCAGGGGAC CCTGATCGCT AGTACTCTGC TAACTGTTAT ACATACTAGA TACAATACAC
481 TACCGATTTA CGGGGCCCTC TAACCGAAGG GGCTCGAGG GACCGTCTAG AGCGGTTGTC
541 GTTGGATCCG CCACTGTTAG TAGGACTGCG AGTGAAA AAG GCTGCCGGAT GGACGCTACT
601 GATTGCAAGC ATTACCTTCA GATATTGCTG TTCATCCTCG TGCGCGTAGC AAAGTAGTGT
661 CGGAGGCAAC GACTGATGAA CTAGCATTGT TTCGGTTGGG CACAGCTGAA CGCAAAGGCA
721 GAAAGACACG CGTGCTGATT TGCTTCGAAT TCTGAAATAC TCCAAACGTT ATGTTGAAAG
781 AAGGTTGACA GAAGTCGAGC TCAAAAAGACC GGTTGGTAGA AATATTAGTG ATAAGAGTGG
841 CAGATGGAAA GGA ACTAATA AACCGCTGCT GGAAAAACAC ATCTAGAATG TACGGATCAA
901 CAATATCATC TAGTGGTTTT AGTGCCATTT ATCGAGGAAC ATCGGTGATT AGGATGCGCT
961 CTTTTTCGAG ATACATACGC AACTTGAATT CGAATGAGCA ATTAAGATAA ACCAATCACT
1021 GGGATCTAAA GTTGAATGAG AAACAAAGAT AATTAATAA CTGAGACAAT TTCTAGAACA
1081 AGATCAAGAA ATGGACTGAA CCAGAAGAAA GAAAGTCTTT TGGGCACACT CGGAAGTGAA
1141 CATAACACCC ACACAATTAT ACTGCGTAGG CTTATAATCG GACCAATCTA ACAATATGTA

```

1201 ACAAAGCATA TCAATGCAAA AACCACGAAG CGTTTGTTTA ATAGTTTAAAC ATGCCGCACT  
1261 GGTTTGCTGT ATTATCAGCT CTAAGATTAG CGAAACCACA AACCGCAATA TCCAGCACAA  
1321 AGTAGAAAGC CACCGTGAGA ATAACACATA AAAATATACT ACTTCAACTA GCGTATAAAT  
1381 AGAGAGCCGT TGGGTACACAT TTTAATCATT GTGCTACAGT GTTCGCGAAG TGTCACATCG  
1441 AGGAAAGTGT TTTTGCTTTA TCAAAAATCT TACAGATTGC ATATAGTTTT TTCATGTAAA  
1501 TTTGTTCCAC AAATAATCAA TTTTTCTGAG TGCTTCTGAT ACGTTTTATCA AAGTGTTTTAC  
1561 GGTGCTCGTT CCGTTCCGCG AGGAATCGGT GATTACGAAA AGGGTTCATC GTTTGGAAATC  
1621 TTGTTTGTCA TTTGCCCAAT AGAAAAGTTT GGTGGGTAC TGTTCTTAAAC ATCAGCAGAT  
1681 TTATCGTGAA ATTGCGGACA AGTTTGATAA GTTGACACGT AACGGTCTG TTTACTTTCT  
1741 TACCATTGTT CTAGCTTAGC GTTTCTGGCG AAGGTTGCTA TATTAGTGGT TTCGTTCCGGT  
1801 TGACTCAACA CAGCAAAAAA AACATTATCA TTATCATAA AGATCGTTTT TCAATTTTCTGA  
1861 GGCACGCATT AGTTGGAATA TTTCTTTTAC AAAACCTGTG TAGTCCCTTT TTATCATAAC  
1921 TGTAGTTTCG ACAGTCGTTA GAATTGAGCC TTGTGACAAA TGTGCATCAT TTTAAACAGC  
1981 TATTGTTGAA TGTGTAAGTGC TCATTCTGTC TAAGATATCA ACTGCGCAAA CTGGGTATTC  
2041 CCTTTTTTCT TATCAAAGCG CCAAGAATAT CAATGCTTGA TGCATAACGC ACAACAGTCA  
2101 GAATGATAAA AAGTGAATAA AACATAGCAC GAGAATAAAG CGCGAGATAA AAATACGTTA  
2161 AGCAACCGAC CTTACTGACT TGTGGGTTTT GCCTAACAGC TTCCCTGACA AACAAATCTA  
2221 TTTGTTGTGT TTGAATATTT TAAGGAGTTG ATATATTTGG GACCTATTAC ATAAACTAAT  
2281 TCTAGCACAA ACAATAGTGT TCTTATTACT ATTATTGGTT GTTATGTAGT TTGGGTATAA  
2341 TTTTATCGT ATATAAATTT ATCTACAGTT CGCGAAGCAT ATTGTTGATG ATTTGATTAT  
2401 TTTAAATATC ATCTATATTG CATGTTATAA ATTTTTAAAT AATCACATTT TACTTTTCTT  
2461 GTGTAACAAT CAGCCTTAGT GGCAATTGCT AACTGATTTA TTATTTTATA CTTTATGCTT  
2521 TAAAAACCGC CTCAACCCTA TAATACATAC TAACTGTCAT CATCGGTACA GTCTTTACTA  
2581 ATTTAATTAC TAATATTCAG TGCTATCGAA ATCCCTACGC GTCTCATAAC TTGAGTAGCA  
2641 AAACAATAGC TTTTGTGTAT ATTTCGTATCG TACCACAAA TCTCGTTGAT ATACCGCAAT  
2701 AGCGGGTTCT GTGGGTTTCC TTTATTTTGC GTGGTTATTA TTAACATTTT AACATTAACA  
2761 GCCCTTTTAT CGAGTATACA CTTAATCTAC TGATTTTGT TTTACCGCACG ACGATTTAGT  
2821 TTTTTCACC CGTTTTTGCT TTACCTTGCT GTGCAAGTGT TTGTCAGCGT CTGATAACAA  
2881 TTTTACTGAT GGTACATATT TACATCTGAT AGGATTTGCG AAGCAAGCGA CAAACAAACC  
2941 GGACAATTTG CTGATACATC TCCAGTCTT TCTTCTTCT TCTTTGTCGT TTGATCTAAT  
3001 ATAAGCCATA TTTACAGGTT ATACCATACG ACGGCGTTTG TTAGTAAATA GATTCATCTA  
3061 TTCATTCATT TTCTTCTGTA ACATCGTACC ACTTTTTCCAA AAACAGAACT GCTACAACAA  
3121 GTGTTGTTCA ATTGGGAATC CGATAATTGA ATAAAAGCCT AAAATTTCAA TACCATCATG  
3181 GAGCAGCCGG AAGATGTAGC GATACACGTG AAGAAAGAAG GTAGCCGAAC GGTATTCGAA  
3241 GTGAAAGGCA AGCACATCGT GCTTAGCGGA GTTAAGCCCC GCATAGAGCA GCTTTTATCT  
3301 AGCTCCACTG CCCAAGAGGT TCATATTCTT GCCGGCACAA GTCTTAGCAT TGATGCGGAT  
3361 CTTTCTCGCG ATGTATGGCA TGGACTTAAC TTGGTTGTTC TAGCAAACGA AATCACAGTG  
3421 CCCAGCACGA TTACCTGGGA TGTGTCTGGG AACGATAGCA ATCATAACTA CGCGCCAAC  
3481 GCTGGTACTA GTGAGGATGG GCACGAAAAA GATGGGAACG ATGGATATCC GGGCGAAAGT  
3541 GGAGGGAATG TTTTGCTACT GGCGAACGCT ATACAAAATC CGGAACAATT AACGATCATT  
3601 TCAAACGGCG GTAACGGTAC TTGCGGTCAG GACGGCGGAG ACGGAGAGGA TGGAGTCGAT  
3661 GGTAATGGTA TTTCCAGGGC AGATTTTGAT AGAAATTTCC AACACTGTTT GTTTTGGAAA  
3721 GATATTGAAC GAAGAGCACG TGTACATAAA ATTGTAAAAA ATATGATTGA TTTGGCCCAC  
3781 AGCGTAAAGA CACAGTGGGC AAAAGTAACG TATACGTTTG GTAATAGTGA TACTTACACA  
3841 AGCAATGTAC TGGAGCTACC AATAAAAAACG TTCCATGATT ATTTGGACAT GTACGTAGAA  
3901 GTTGTAACGC AAAATGGAAG TGAAATAATA TTTTCTTTGT ATGAAGCTGT AGGAAAAGCT  
3961 CACTCATTCT TTGTATACAA AGGATCACCA GGTGTAAAAG GCAAACCGGG CGGAATGCAC  
4021 GGATTAGGAG TTCAGGGAGG TTTTCCCGGA GAGATAATCG TGAAACATTT ACACAATGAA  
4081 CGTGCGTTTG AAATTA AACGTGCAAAAAG GGGGGCAAAT ATGGCGATAA TGGTAAGGGT  
4141 GGCCTGTGTG GAAAGCACGG CAAGAATGGT TGGGATATGG GCTATTTGGG CTGGTTACTC  
4201 TCCGAACCAA CAATATACGG ACGAGATGAA AATAGCAAAC TTCAGGTGTC TTATTACAAA  
4261 GAAGATAATC GAGCATCAAG CCGAATCAAG TGTCCGTATA AGGCAATTCA CAGCAGCTAC  
4321 TTGTACGTTG AGATTAACGA ATCGAAAATC GATCATCTAT CGCAGATTGA ATTTAGGGAA  
4381 AGGAACAACA TCCAGGCACG TGTCGAAAGA CAACATCATT CGCAAGTGGT AGGAAAGAAA  
4441 TCCATTCTGG AAGTGAAAAT TCGTGCTGAA TTTGCTGCAT ACTTGCAATT GATCGCAACA  
4501 CAAAAGCAGC GATTAGCACA ACAGCAAATA GAACAAGAGG AATCAGCAAA AGAAAACAGAA  
4561 AGCTCACAAAC TAGTGAATCT CTCAAAAAGT GAGCAGCAAT TGGCGCAAAA GTTAAAAGAA

4621 AATGGGGAAT ACGATGCCCT TCAGCAAACA GTCGAAGGCC AACACACAGA TCTTGAACGG  
4681 GCCACGGATC CATTCAATTA ACGCTTCGTC AATTTTACTC AGGACACATC TATCCACAAA  
4741 CAATTTTCTT TTGTTGAGCT TCATACCATG ACGAAAGATA CGGAACAAAA GAAAATGATT  
4801 GATATTCTGA GCAATAACTT GAATCTAGAC GACTGGCTAC AGCTACAGGC CCAAGTTATC  
4861 AGTGACCAGC ATGAGCTGGA GTCCTTAATC AATCTTTTGG TGACTTGTTT TCCTCATTTT  
4921 AATACGTTGG TGGATGCAAA TGACAAAGCA AAGGTACAAA TCATTGTGAA AACCTTAAAA  
4981 CTGAAGCATT TATTTGCAGC CTTAAACAAA AAAACACACG ATCTGGCGAC CTATCAAAACA  
5041 AATGTTACTA ATTTTCGAATT AACAGCAGAG AGTATAATTA GATATCTGGA AGAAACGGAG  
5101 GAAAAGAATG ATACTTTTCA TCATCCCATG CTTGGCAGTT TTAGGAAATA CATTTTGTAG  
5161 AACTCCCTAG CACAGCGAGA AAACATTGCC CAATTTGTAG TAAAACATC GAATAGTAGC  
5221 GACGAAGCGA TCAAACGTGC TGTTGAAACA TTCATCTTGG AAACAGGCAG CACAAAAACA  
5281 GAAAATGCAAG TGGTGAAACA GTTTTACAAT GAGTACCATG AATTTCCAAA GAAGCAGCAA  
5341 AACAAATATTG ACGCTTTAAC TGAATCATTG GCTACAGAAC TAAAGAAATC AATGCATCAG  
5401 GAAGCATTCC GTTTGTGGAA TGAAAGCGTT GGTGGCGATA CTTTGCCTGC AGATCTAGTA  
5461 AAGATGATCA GACAAGATGA AAAGTTAAGC TCACTGTACG ATAAACTATT ACTTGAGAAA  
5521 AATACTGAAT ATGACTGGGA AAGATGTAGC TCAGATAAAA AAATACAAGA AATATTCAAG  
5581 ATCAGCATAG AACAGGAAGG AATCACGGGT AAAAGTTACA GAGTACTACT GGCGTATACG  
5641 TATGATGTGA ACATTCCGGT GTATGCTAAA AATGAGGACA ATGAAATCGT TCTGATAGAA  
5701 GATCATAATC CAAAATCCGC AACAGTGATA CATATCTTAC AAAAAGAAAA CGAATTCATT  
5761 CAACTGAAAG ACAATGAAAG TTACCGCCAA CTAGAAGAAG AGCGTGTGCA CAAAGATAAG  
5821 ATTTATCGGC ATATGTTGAC GGAGATTGAT GCTATGCAGA ACATGAAGGA TTACTTTTAT  
5881 CAAAAAATAT CCTATCTATA CGGTAACAGT GATGATAATG CAATCGAGAA ATTAGATGAA  
5941 AATATAGCAA TTGAAAAGAT TGCAGCATT TTTTCAGATG AGGAAAAAGA CCAAATTGCT  
6001 CAACGTCTGA ATACCATTTT ATCTCAGTAT ACTAACCAGT ACAGAGTGTT CGATTACATG  
6061 TTCCAGCGTT TTTCTGTTGA AGGAAGACAT TTGTCATCAA ACGAACTGTG TTTCTTAATC  
6121 GACTCTATAC TTGCTCACAC TGTTGAAGCA AGGCAAGAAA GGTACACCTT TTCATGGATT  
6181 GTTGCAGCAT ACAATCAGTG CAATTGGACA GATGAGCTGG TGTTGCTGCA GCTGGAGAAC  
6241 TGCTACAAGA GACAGCTGCA GGAAAAGCCC AAATGGCGCA AGTACATGTC AAAAAACGAA  
6301 AATAAGGCAG TTTTTGTTAG TGTTTTCTGT TCAGTTTACT CGTAAGCCTT GCCTCCGCA  
6361 GTGTGTTGAA GATATCTTGC ACTTGCTGAG TAACATTCCA ATAGAATCGG TTTGTCTAGA  
6421 TGAAGTGGAG GTAACAGAGT GGCCTTATGT GCTTAAGGAG TGCTATTGGA CACATAAGTT  
6481 GAAATCCCTC CTAACATGGG ATAATGAGTC AGAAGGATTA ATTTCTGCTT CGTTCCTCGT  
6541 TCTGTCCATA GAGAACACGT ATGGAAACAA GTTGATGCAG AATTTATTTG AATCGTTGGT  
6601 GGAAAAGCGC AGTGAGCTTA CGCATTCTAT GTTATTA AAC GTGCTATCTT GCTTTCATAA  
6661 ACAAAGTGG AACTTGTGTG TTGATGATCT TAATGTTTTA AAACAGAGTA ACTTGTTTGA  
6721 ATGGATTCAA CACATGGAAA CAAAGTACAA GAAAGATTTA AAAGA ACTCA ATATTTCTCA  
6781 GATAGTAACA ATCATTAGAG GCAATGATAA TACGTCAAGT AATATAGTGA AGCATTGTGTC  
6841 AGAAATTGAA CAATCGGTAG CAAATATTCA ACACAATAGC AAAACCATTA ATGCGAGCTT  
6901 GATATCTAAC TTTTTATCCA ATGATGTTGA GAAATGGGCT GAAGAGTTCC AAAGCAGTCA  
6961 AAATATGCGA TGTTTGAAA AGTACGAGGA AATGCTCGCT GTAATTGATA GGGCAATTGA  
7021 GCTTAAGAGA GGCTTTCAGT TACGAAACAC TCAGCGACTA ACGGTGTTGG CATTGCTGAC  
7081 GAACCATAAC AGCACTTTGG CCCAAGTATC GACCGGTGAA GGGAAAACGG TTATTGTGGT  
7141 AGCGATCGCA ATTATAAAAG TACTCTTTGG GGAGAAGGTT GACATAATCA CCAGCTCGTC  
7201 GGTACTTGCC AAACGCGATG CAGACGACAA TAAGGACATC TACGGATTGT TTGGAATTAG  
7261 CGTGTGCGAT AACTGTAGCG AAAAAATACA AGTACGAAAAG GAAGCTTACT CTTCGAATCA  
7321 GATAGTTTAT GGAGATTTGG GTAACTTTCA ACGAGACTAT CTGTTGGACA GATTCTATGG  
7381 AAAACGTATA TTGGGAGATC GTAGCTTTGA AAATGTGATA GTCGATGAGG TGGACAGCAT  
7441 GTTGCTCGAT AAGGGAAAACA ATATATTATA TTTATCGCAT GACATTGCTG GTATGGATAA  
7501 GCTGGAATCG GTATACTTGT ATATTTGGCA AATGGTCAAT ACTCCGACCG ATCTTTGCGA  
7561 AGATGAACTC GTGAAAGAAA TCAAACAGTC GTTGTTGAGT GACATGTATA CACTCATCCA  
7621 GAAAGCGGAT ATCCAGAAGC TTAGCAAAAG TTTGGGAAAA TCAAATGTAT TGGAGCTATG  
7681 GGAGAGATTA ATCAAGTCTG GAATAATAAA TGATTACAGG AGATTACAGA CTCAAGCTAT  
7741 TGATTCCAAC AAAC TAGAAA AGCTACTTTC CCCAGATTTT ACACAATACA AAGATCGTCT  
7801 AAGCTTCTTC ATTTGGTCCAC GTATAGATCG TGAAACGAAT GTTAAGGTAC CCAATTTTCT  
7861 CAAAGAATTT GTGGAGAGAC ACTTGGACAG TTGGATATCC AGTGCCTTAA CAGCGCTGTA  
7921 CATGGTCCCG GGACAGTACT ATGTGGTGGG CGTCTACAGA TCGGGAACAA GTGCCGACCG  
7981 TATTGCAAA GTAAATTATC TCGACAGGGA TACGGGTACT GATCAAGTTA GCTCGCAGTG

8041 GGATGAAGCG TTGCACCAAT TTTTGCAGCT TAAGCACGGA TGTAAGCTGT CAACCCAAAG  
8101 CCTGAAGGCA GTTTTTCATTT CCAACGTTAC ATATTTGAAG AAATACAAAC TGCTGTATGG  
8161 ATTGACAGGC ACGTTAGGAT CACAAAGAGA AAGACATCTG CTTGAGGAGA TACACCAGGT  
8221 AGACTTTGTC ACTGTCCCCA CTTTCAAATC GAAACAATTT GAAGAATATG AACCCATCAT  
8281 TTGTTCTGGC AAAGATGACT GGTTAAAACA AATACACCAA GAGGTAAGTA AACTGACCAA  
8341 GACTGATAAA AGATCGGTCC TGATCATTTG TGAAACAATC CAAGATGTAG AAACATTGCA  
8401 AAAGAATATA GCTTCTAAGG GGCACACAAA AGTTCGCATT TATGTACGCG ATTATGAGAA  
8461 ATTAGATGTT ACAAAGGGTA AACTGATACC GGGAGAAGTT ATCATTGCCA CCAACTTGGC  
8521 AGGTCGAGGC ACAGATATAA AAATATCCGA CGCACTTGAA GAGGCCGGAG GATTACACGT  
8581 GATATTATCA TACCTTCCGG CGAACATTCC AATTGAAGAG CAAGGCTTTG GAAGAGCGGC  
8641 TAGAAAAGGC GAAAGGGGAT CGGGACAGTT GATAATAATG GCAGATGGTA GAAAAGCGAA  
8701 TCTTTCTATG ATATTTACCC TGAAACAATA ACGTAATGTC GATGAGCTTT TCCGCTTATC  
8761 AGCTATAAAA GCTTATTACA AAACAACGAT TAAAACAGAA GAGAATTGTT TTGAAGCATT  
8821 CAACGAGCTG TACGAGAAAA AAATGAAACT TTTAGCTAAT GCTGAAACGC CAGAGCCGGT  
8881 GAAGGATATT CTGCTCCAAA GTTGTTTGGA CAGATGGTCG TTTTGGTTAG ACGAAAACAA  
8941 TGTACAGATA GGAAAAGCAT CAGATGAGGC TTCCAAGCGG GAAGTAAAAC AGCGACTGAA  
9001 ACACTTTCTA TTGCAATTTG ATGATCTGAA AGCAACGAGC GCAAACAATT GGGCAGCTTG  
9061 GGTTGAAGAA AACCCAATGC AAATGATAAA ATTGGGAAAA TATATTTCTG AACACGAATC  
9121 AGAGCATCGC GATACAGCAT TGCAACTGTT TGGGAAAGTT ATCTCGAGTG AGCCGTGTTT  
9181 TTGCGAAGCC GCCTATTACT ATCGTGCATA TACACGATCA CTTGACAACA TGAACATAGG  
9241 CGACTTCAAA AAGGATTTGC GTTTGGCTGG TAAGCTCTTT GACGATCATA TACAGTGCAA  
9301 AGTTTATGCA TTAGGCATCG TAAGTAAACA AAAGGATACC GCTATATTGA AGAATACCAC  
9361 TACAGTAAGG AATACCATGA GTGAGGACTA TGAAAAGCAA AATAATAGCC TTATTAATCT  
9421 ATACTCACTG TTCATACGAT CAATAGACGA TATGTTGGGC CATTCTATAA GTCCCGAATC  
9481 ATTTGTAAAT TATGAAATAA AGGAGGATGT GGCTGGAATA ATCTTTGAGG ATCTTGTACG  
9541 AATCGGCTTG ATAAAAAGG CTGAAGTAGT CAGTAACGTA CCAAATGATC AGATGCACAG  
9601 AATTCACAAC GATTACGGGA TTTCTGTAGA TCAATTGAAT AAGTTCCTAG ACCAGCATAA  
9661 AGGACCTATT GATGAGATAG TATTCCTCAA AGCTATTCTG GAATCATTCT CATTTCCAAG  
9721 CAGAATCGAA TTTTGGAAAG AGCTCATCAA TCAAAAAGGTG CTACATATGT TTGAAAGGTA  
9781 TGTTGTAGTA AATGAAGAAC GGCTCAAAAT AATGGATCCT GCTCTAATGA ACGTTCTAAA  
9841 GAAAAAGATA GACAAAAGAG ATCTGTGCGAA AGAAGTTGTT AATGTAGGCA AGTGTGAGAT  
9901 ATTGTTGATT GCCGAAGCAC AGTCACAGTT ATACTTTGAA AAAGAGAAAT TCATTGATAT  
9961 GATCGGTAGA AAGAAGTATA ACTCTCTCCA AGAAAATGGT TTAAGTGCAT TCAATGAAAG  
10021 GGCTACCATC GAAAAAGGTA GAATTGATGG CTGTGTGTTT TCTGCATTTG ATTCTATAAC  
10081 AGTTCATGAT ATTACCACCA AGACACGAAT TACCACTCGT GAAGCTATGA TCATCATAGA  
10141 CGAGCTACTT GCGCAAAATG TTCTAGAAAA GAGAGCCGAG AGTTTTGCTC TAACAGTTAA  
10201 TAATGACGAC ACCCAGGATG TCTTACTTCC TTCTTTTCCA GTGTATGAGG ATGTCGTTAG  
10261 AAACGTCCTT GCTTCATGTT TTGCTTACAG ACTAGCTCTG AGAAACATTG CACGACAGCT  
10321 AGAAGAGGAG GAGAGTTCTG ACATTCGCAT TGAATTAATA CTTGATCCTT ATCGGATGTT  
10381 TTTCAACGAT CTATTACAGC AACAGATAAT CCAACCTCCT ATGCTTTCCC ACGAGGAGAT  
10441 TGATGGAAGC AAGTTGAAAG AGCTGTACGG TAAATCATTG TCGAAAGGGG CATGGAAAAG  
10501 CGTACTTTCT AAGGAGATTG GTTTGAGCGT GGAATATACC GAGAGTTTGT TTGGCGTGTT  
10561 GCTTGAGAAA CGATGGATTT TTTCGCTAAA AGATGATAAA ACATCAGTTT TATTCTATAA  
10621 ACCATGTTCT AAAAGCAATC GGGCAAGTAT TGCTGATCTA AATTCCGGCA TTGCTAAAAT  
10681 TCAGGAGGAA CATGGCCTCG ATGAGTCGTA CGACGTTGGT TTCGCAGTTG AAAAAATGGT  
10741 TAACAATCAA TTAAGTAAAG GTGAAAGTAC AACTGCTGAA CATATTGAGA ATGTGTTAAG  
10801 AAAGTCAAAA TCCTCCATTT TAGGATTAATA TGTTCCGCAA GGCACGCTGA AATCGATCAT  
10861 GGACTTTTAT GGTAAGGAA ACTTTGGAAG CATCGATGAG ATGCGCATCA TTATCAGAAA  
10921 TGGATTAGAG CATCTGTTAG AGCTAGGAGA GAGAAAATGG ACCATGGAAA TGATACTAAA  
10981 TACCTCACTG GTTTTAGCCA TTGGTGTAGC ACAGATAGCA ATTGGCGCTA TAATGGAAGT  
11041 GTACTCGGTT GGACTTATGA CTCACGCAGC TAGTTCATTG ATTAGTGAAG GAGTCAACGA  
11101 CATCATGTAC GCTGTGATG CTGCCGTATC TGTAATTTT AGTTGGCAAG ATTACGCAAA  
11161 TTATAAATGG AAAAGTGTAG CTTTTTCGAT TTGCACGGCA GGTGTGGGAA TGTATGTGTC  
11221 TAAAGGTGTT AAAGTGTAG GAATAGGATT GAAAATAGTT GGACCAAGTC TCGAGTACGT  
11281 TGGCAAACGG GTTGCCGGCA AGCAGCTTAT CAAAGAAATC GGCAGTCGAA CGGTGGTAAA  
11341 AGAGATCGCC AAACGTGTGG CGTTGAAAAC GGCAGAAAGG GTCTCGTTTG CTTTGGCAAA  
11401 TACTGCTAAA GATATGATTG TTGCCGACTA TCTGCAAACC AGACTAAACT CTGTAGCATC

11461 GGATATTTTG TCAGGAATCC GGAAAGCGGT GGAAAGTCAT ATAGTTGCTC AAACCTTACA  
11521 GAAAGCTTAT GATCAGTTAG GTGANNNNNN NNNNNNNNNN NNNNATGATC AGTTAGGTGA  
11581 GAACGACGCT AAAGGCCGGG CTACATTGAT CGTACTCGCA AGCGTAATTT TGATTTTCAC  
11641 TAGCGCATCT GGCGGCGACT GGTGGAAGCT AATTTTGGTC ATCCAGGGAA TGGTCATGCC  
11701 GGATCTCAAA ATTAAGTAGT TTTTCCATCG TTTTCCATTG CAAAAATGGA TGCAATGCGT  
11761 GCAAGACATG TGTATCTACG TTTTACAAAA CTTTTCTCCT CCGTTTTTATG TAAAAACAT  
11821 GGAAAAATAA CGTATTTTCT GCAGCGGCTC CAAATTGTTT GGCAAAATGC TTCGGTCAGC  
11881 CGCCGCCAGA TGCGCTAGTG AAAATCGAAA TTACGCTTGC GAGTACGATC AATGTAGCCC  
11941 GGCCTTAAAG CTCTTGTGGA CGACTTGACA AATGCATAACC TGGTGGAACA GACTATGACT  
12001 GATACATTTG AGCTCTCCGC TAAGGAAATA GCCAATAGTG TGATAAAAGG AATAAAAAAA  
12061 GGATTTAAAA AAAAACATAC AAATAGCAGC AATTTTCATT CCATGCTAGC TTTAGTACCG  
12121 GATGTATTTG ATAACTCTTT ACAAATTGTC GAAATACTTT CCCAAACTAA TAAACTGTTG  
12181 GATTACATTA ATGCGGAGAT GGTACTGAAG CTCTCAAAAA TTGAGCTTAA AACGCCAGCA  
12241 AAAGAAACAC AAGTAAATCT ACTAAACGGA AAAGATTTTG AGCGCTTTCA AACGGAAGTG  
12301 ATCGGTCAAT GGGAAAATAT ATTAATAAAG CACGTTGGAA AATTGATCGC ACAACATGTT  
12361 GTGCAGCCAG TGCTTAAATT CGGCGTGCAA TTGGCCTTGT CATATGTCGC CGAAGGTTTA  
12421 ATGCATATAA GAGACAGCCC AAACACTACC CTGGACAGAC ATGTTGACAA ACTAAAGAAC  
12481 AAGTATGAGA AGAAAATCAC TCGACCTGAT ATGACGGACG ATACGAAGCG TCAGCTTATA  
12541 GACCAGTATC ATGGGCGGTT GCTGAAAATG CTGCACAAAA CTCGTAGTCC ATCTCTGTTG  
12601 GGCATATCA TCCGGGAGAA CGTTCCAATG GATTTGAAGT GCGTCGGGGC CTGTACTAAC  
12661 ATAGTACATA GAATGTTACA GGAACAAAAT TCTAATATCA CGGGTCTTAC CATAACTGTG  
12721 CGTGGAAAAA AGGGAATAGA GCAATCGTTT ACTTCTGGTA AGAATGGTCG CAAAGTATAT  
12781 CTGGAAGTGT TAGAAAACCA TTTTACTGTA TCACAGGTGA AAGGTTCAAA CATTGACACG  
12841 ACTGAGAACA ATAGTCTGTA TGGAGCGCTA ACGATTGCTC TCCCGACTTT GCAATCGATA  
12901 GAGCCAACCG TATTCCGATC TAAGTTAAGC AAATACATTG AAAATAACAA AAGCCTCCAT  
12961 CATCTCATTG AGCAGAGCTT ACAACACGCT CCGTTAAAAA AAGGGGTGAT TGTAAGTGCT  
13021 AAAATTAAGA AGGTAGACTA AGAACGACCA AGCCACATTA CGACGACGTT CTCTTTTGTG  
13081 AGTAGGCGAA CGAGAGAGAG AGATGTAGAG AGAGATACAA AGAGAGAGAA AGAGAAAAAG  
13141 AGAGAGAGAT GGATACTAAG AGCATAAAGC ATTTTAAACGA CAAATCGATC ATAAACAAAG  
13201 TAGAGATCAT CATTTTTGTT GTATTAATAA GTTAAAACAG TTTATTAGTT TTGAAATTAA  
13261 AATGATGTAA AAAACCATGT ACTATTGTTT ATCAACTGCT TAGTCTGTTA TCATTGTAAT  
13321 GTAGAAAAAC GTTCAACACC TAATTCGTTA AACACATAAG TTAAACAAAA CTGGTCAACG  
13381 TTTAGATATC ATTACATTTA TTCGTTGGAT AGCAAAATCT AGAGAATCGA ATATCGTTTCG  
13441 GTTTTAAATT TCGCGGAACG TAAGGTCCGC AGCAAAAACT ACTGTAGAAT GTGTACAAAT  
13501 TGTAATTTAT AACGCATTTT GGTCCAGATG ATCGTATTGG AAGTCAGTTA TCTACAGGTA  
13561 GGTAAGATTT CACAACTAC AGTTTGTTC TTTGGAATTT AGTAGTAACA CTTGTTTTTA  
13621 CAATAATCAT ATTTTCTTCA ATGCAATATT ATGCCCTTGT CTCATCCTC CACATCAGAA  
13681 CGCAGCTAAG CGCACAAGGA TCGAGAGATT ATCCATTGAC ATTTGGAACCA GAATCTTGCA  
13741 GATAATCATA GTTGTTTCAGT CAGAACCATT ATTTGCACAAA TTCTACTTAC TTACGTACTG  
13801 ATACATATAG CCTGATATAT GATGTCAATC AGCCTTCGTT CTTCTATAT GACACGATGA  
13861 TACGCTTACT GTTCCTGTGT AGTTCCTGTG ATTTATAAAT TATTATTACG CTGATCATCA  
13921 CTTCTAAAGA TAATAACTGG ACGATGATTT TGTAATATT GAGATATAAG AAGCGGATTG  
13981 ATTAGAAATA ACTCATGATA TTATGTTTTT GTTTCAGTAT TTCCGCACCA TAACAACAAG  
14041 AAGTTTCTTT CTACGTCAAT AATAACGTTT TGATCAGTTA GCAACGCCTC GTTATCTCAC  
14101 TGTTTTTATA TATTATTATT ATTATTATTA TTATTATTAA ACAGGGACGA AGTAAAATTG  
14161 TATTTTGGC ATAAAAAAG TCATAGACTC AGTAAATGTT TAGAATTAAG ATTAGTATGG  
14221 GATTATATAA CACCGTTAAA ATGTAAACAT ATGTTGTCAT ATGAAGTCTC GTCACAAAAC  
14281 TCAAAAAAGT CATTGTCATA AAAATTCAAG ATTTTAAACG TATGCGTCAT TCGCCAAACA  
14341 TATGAATGGA TTATGGTTTT ATTTTTAAAT AATTTTAAAT ATCAAGAAAC CATCGAGCAT  
14401 GTTAAACGGT GTACCAAACT CAGATAAAAT ATTTGATCTA AATAAATAAT ATATAAAGTT  
14461 TTTTTTTATT TATGAAAAGA GAGGGTTTGC AAAAAACACA CTCATACAAT AGGACATTTT  
14521 GAAAAAGTGT AAAAAAGTCTA AACATCATAT AGGAAATGAT TACCTCTGGG TTCTACTTGT  
14581 ATGTAACAAG ATTATATTGT ATGCTCGTTT TAGTATTTTT GCTGTAAGAA ATATGATATT  
14641 TCACCAGAAA AACCTAAATA ATCAGTGAAA ATGTTTATGA GTAGATAAAA TAATTATGAA  
14701 GATCTAAGCA AACTTTAGGA TTTAAAGAGA TGTAATACCA TGTAATTTAA AAACATTCC  
14761 TTCAAACGCT CAGTGGGTGT TGGATTGCCC TTTTTGCATG GAGACTTCTA AGTGAGTAAG  
14821 TTACTTTTTCG TATTAATAAT TCTCAAAAT TATATAATTT TCTTAAGTTT TATTAATATT

14881 ATTTTATTAT TAGGCCTAAT GAAATTGATA AAGTGCCACA AACTGCCAT GTGAATGAAT  
14941 GTTCAATGAA TGAATCAGCA TATACCATAG CAATGTTTCA ATGAAACAGC TAGCACTCTC  
15001 TCTCTTTCTC TTGTTGGGCT GCTCACGATA GAGCACGACG GTGTGACATG GCCCGGTCCA  
15061 CAACAATTCT CCAGGATGCT CGGTCCATGG CTGCAGCCTC CAATCCATGT AGACACCCGA  
15121 TCTCCGACAG GTCTCGCTAG CAAGATAGCA ATTACCACAA CTGACTAGAA ACATAAAAAAC  
15181 TCTGTATGGA TAAATGTCTG CCATTCCATC TGCCCTAATA TGCATTGAGC TGATTTTGTT  
15241 AATTGTGATT GTGTTAAATT ATGTTAATAC ATAATGGGAT TGGAATCGGT ACTATCTATT  
15301 GGCAACGTGA ACGTGAGGTA ACATTATTAA TTTTTTTTAA TGCTGCACCT GGAGGAGGCT  
15361 TATCTAACGG TTATCAACAT ATTTGTCTCC TTTCCAGACC TTCGACCGGT TTCGTTCAGC  
15421 TCTGCATTAG GACAAATTGC CCAGATGGCA AAGAGCCATC TCAACACTAA ACTGCAACTA  
15481 TAGTGGGTCT AAGAACATGT TGTAAAATAG CCGTCTCATG GGGCAGCTG GTCATCTGAT  
15541 AGATAGGGGC ACGTTAGAGC TCCACAACGT CAGCTAATGG GAAAGTCTCA TCCAGCTCAT  
15601 CCACCACACC GATTATGTTG ATAAGGATAA GATAATGCAG ACCTTGTGCT GCAATCAAAA  
15661 TTAAAATGCA AAATGCAAAA TGCAATTACC TAAATGTGAA AATGTTATAA GTAAGATGAT  
15721 TACTATTCAG TTAGTAGTAT AGTAGTTGAA TAATAGATCA CTAGAAATTA GGACTAGAAG  
15781 AGCAGAGTTT GTAATGTCGT ATTTATAGTT TGATTGCAGT TTATATATTA AATACATCTT  
15841 CCGGAGTAAG TAGGTTGATT CAATTGATTC AATTTATGTA TTAATGTTTG TTTGTTGATT  
15901 TCATTTTCAA AAAACGCCTC CATATCAGTT TTATAAACGT ATTTGTGTAC TTGTATAGCG  
15961 GTCCCGTGGT GCAGTCGTCA GCTCGCACGA CTTAACAACA TGCCCGTCGT ACGTTCAAAC  
16021 TTAGAGGGGG CCGCCCGGCC CCCCAGTAGC AATATCTGGC TATCAAGCTG CATGGTACTA  
16081 AAGTCTCGAA ATCCTGTATA GGGCTGCATG TCCCATAGG AAGACAGAAG AAGAAGGCCA  
16141 AATAGAAGAA TAAGTACTTG TATCGTAAAC GTACGCTATT GCCTTTGTGC ACTGTTAATA  
16201 TAAATTCATG CCTGAACAAT TTTTTTTTTT TTGCTTATAC CACACTTACT TACATATCTG  
16261 GCGCTACAAC CGCTTTGCGG TCTTGACCTC AGGAATGTCG GAAACTGCTC AAGGTTTCGT  
16321 GCCTCCTCGT CTTTATACTA GCATTTTTAT TACAATACAT GCTACTAATT GGCAAAAAAG  
16381 AATTATTACA ATTTTTTAAC ATACATTTGT AGGTGAAATA CCGTTTTTGT AATACGTTAA  
16441 AATATTTATA TGGTATCATG TGTTGAAATA CAAAAGAATG TTAACCGTT GCTAGCAATA  
16501 TTTACATGGT AACCAGTAAC AAGTAGATGG TTTTTGCTAG TTCATTACCC CTTCCGGAAC  
16561 CCTCTAGATG TGCCCTGTCC ATGAGGAAAA AGATGGAAGT TTTTCAAGCA GAAAGCTGAT  
16621 CATCTGAGGG CACCTGAAAG GTATGCATCA ACCCCTTCT TATCTGGAT GGTGCTTTGA  
16681 ACATCGTGCA AAGCAAACGC CGTATCACTT CGTCGCCAGT GCTGTTAGCG GTAACACACG  
16741 GAGTGAGTTT GTGTGGCGTG TTCCGTATTG TGAATCGAGG CAAGCTTTTA TCAGCTATAA  
16801 TTTCTGTTTA AGAATACAAT TTATCACAGT TATCGTACCA GTGTTTTGAA AAAAGCAATA  
16861 TCAAACGAGT TAAACAGCTC GCAACAGATG AGTTAATGCC ACTACCCTTC TCTAATCGTG  
16921 TGCGTCGAGC TAAGCGTATC TTGCAAAGGA TGCGTCATCA CATGTTTCGTG TCAATACCGG  
16981 TAAGCACCGG CCGGCGTCAT GAAGTGCACA TGACCGAGTG CATATAAATT GAGAGTGAGA  
17041 ACGTAAAGTG TTTAAATTGG TTCATTAAGA AAGAAAGTAA CGTAGCAAAA ACGTTAAGTG  
17101 ATTTGTGCGA CTTCAAACGA AATGATAAAC ATGTGGTGAT GGAATTCCC CAATGTAAAG  
17161 CATTTTGCTT GTGTTTACTT GCCGATTCCG GCAGACGGAG ACGGTTTCAG TTATTCTGCA  
17221 GTTGTGTGAA CCAACGTGAC CTTGACTGTT TCGGAATTTT TACTCCATAG CAGTACAGTA  
17281 GTGTGATTGA CAATGTTGCA ATTAATTTGT GAAATTATAC AAATGTGGTT GAATGTAAGT  
17341 GAAGTCTGAT GGTATGTAGC GTCAAACGAA GCAAGACAGT GTAACGTGCT GATGCCCTGC  
17401 GTGAAGGATT GATTCTTCGA AACGGCTGTA ATCTATTAAG CAATTAACGT ATAAAACCAA  
17461 CAAGATACGG GATATATGGT CGTCGATAAG GAAAATGTAT AAAGTGATAA GCGGTTGTGG  
17521 CTGGTGCTTA CCATTAAAGT GAATCAGTGA ATAAAAACA ACGTGCAAA AAGCAATAAC  
17581 ATAGTCCAAT AACAATAACG AAAGACATCC GATCATGGAA TTGCCGGTGA CGATAACGGGA  
17641 GAGGAGTGTG GACAGCCGAA CCGTGATTGA AGTGAAAGGG AAATATATCG TGCTAAGTGA  
17701 AATTAATCA CGCATAGAAA CCCTCTTGGC CAACTCTACT GTTGAAGAGG TTCGTATCTT  
17761 TGCTGGCATC ATTCTTACCA TCGATGTGGA TCTTTCTCGC GATGTTTGGC ATGGGCGAAA  
17821 TCTGGTGGTT TTGGCGAACG AAATCAAAGT GTGCACTACG GTTCGTTGGA ATGTGTCTGG  
17881 GAAAGATAAC GACCATATCT ACACGTGCAA TGCCCGTACG GATGGGAACG GTGTTGGCAA  
17941 ACAAGGAGCC GATGGATATC CGGGCGAAAG TGGAGGTAAC GTTTTATTGC AGGCAAACAC  
18001 AATTCAACAC CCCGAACGAT TGACGATCAT TTCGAACGGT GCAAACGGAA GCAACGGTCA  
18061 GGATGGTGGC AATGGAAAGG CGGGCGTCGA CGGTAAAGGT ATCTCTAGGG CAGACTTTGA  
18121 GGACAAGTTT CCGCCGACTG CCAAGTTTTT GGAGGGCCT CGTGCTAGCC GCGTAGAAAC  
18181 CACTGTCAAA AACATTAATA ACTTAACTCG AAACATTAATA ACACAGTGGT TGTTTACAAC  
18241 AATGCCCTTA TTTCCCGTCA ATACCACTCA CAGAGAAAAA GTACTTTTAT ACACGGATTT

18301 TCGTATCGAT TACTTTAACA GTCTTTACAT CGAGGTGGAA ACGCACGATG GCTGCGAGAT  
18361 AACTTTTTTCT TTTCAGCAAG GCACAACGTT TTACAACCTGC CAATCGTTTT TGATGTACAA  
18421 GGGAACATCT GGCCAGCGTG GACAGGCTGG CGGAGGATAT GGGCTGGGAG GTCAAGGTGG  
18481 ATTTGCTGGC GAAGTGACAA TTAAACGTTT ATACGACGGT CGTACGTTTG ACATTAAGAC  
18541 ATACTGCAAC CGGGGCAATG ATGGAGATAA CGGAAATGGT GGATTGTATG GTGCGCACGG  
18601 TAAAAATGGT TGGGACATGG GTTATGTGGA TTACATAACG CACGAACCAA AATTGTATGG  
18661 ACAGGATGAA AAGAGCAAAC TTCAGCTGTC GTTCTATGAA GAAAATTCAT CCAGCAGAAT  
18721 GTATTGTCCA TATAAGGCTT ACATCGACAG CAGCTACAAA TATGCTGGAT TCCAGGTATC  
18781 AAGAATTGAC CATCAATCTA GTAACGAATT CAGGGAAAGG AACAAACACCC AGTCACGTAC  
18841 CGACAGACAG CATCATGCGA AAGCAATAGG GAAGAAATCC ATTCTTGGGC TGCGCATTGC  
18901 TGCTGCATTT TCCGAATACT TGCAAGAAAT TGAACAAGAA AGGCAGCAAT TGGAAAAACA  
18961 AAGAATCGAG AGAGAAAAGC AAGAATTAGA ACGGCTGCGA ATCGAGAAAAG AAAAAACAGGA  
19021 ATTAAAGAAA CAACGGGAAG AACTTGAAAA ACAAATTTTG GAAAAACAAC GGATCGAGAG  
19081 AGAAAGGAAG CAGGAATTGG AGAGACAACG GATTGAAAAA GAAAAGGCAC GATTGAAAAA  
19141 ACAACGGATT GAGCAAGAAA AGCAGGAATT GGAGAGGCAA CGAATCGAAA AAGAGAAGCA  
19201 AGAGCTGGAA AAACAGCGGA TCGCACAAGA AAGGAAAAAC ATTTTACAAC AACAAATCGA  
19261 ACAAGAAAAG CAACGTTTGT CACGACAGCA GATTGAAAAA GAAAGGCAAC AAGAAATGGC  
19321 TGAACAGGTG AAAGAATATT TGAATTGTGA TGCATTGCAG CAAGTTGTTG AAAGCCAATA  
19381 CGCAGATCTT GATCGAGTCA CGGATCTGGA CATAAAACGG TTTGTTAATT TTACACAAGA  
19441 TACTTCTGAT CAGGATCGAA ACGAGTTTGT TAACTTGGT GAAATGTATA AAGATCCTGG  
19501 TCGAGAGGAA ATATTTCAGCA AATTGTACAA TAACTTGAAT CTAGACGATT GGCTACAGCT  
19561 TCGAACACGT CCTGCTGATC GCCCTGAGCT GGTGTCTTTG GTGGAACATT TTAAATCATT  
19621 AAAATCACAG TTCGAACGTT TGCTTGGAAAG GGATTGCAGT GCTAAGATAA CGAATGTTAC  
19681 AGAAACGTTG AAAATCAAGT ATAAAATAGC AATTCTGAAA GAAATTACAC AGGAACTGCC  
19741 GACCTGTTTT ACAACAGTGA ATCGTTTTCGT ATTGACAGCA AAGACTGTAG GGAGATATCT  
19801 GGAAGAAAAC GATGAAAAGA ATGACACATT TTATCATCCC GATCTTGGCA CTTTGAAGCA  
19861 ATACATTTTT GAAAACAATC CAGCACAACG AGATAACATT AACAAATTCA TGGCAAAAGC  
19921 ATCAGAAAAG AACGACAATG CGATCAAACG TGCCGTAGAA ACATTCATTG TGGAAACAGA  
19981 TAGTCAAAA GATGAAAATA AACGTGTGAA ACTGTTTTAT GATGAGTATC AGAATTATTT  
20041 GGAGAAAACAG CAAAGAAATA TTGATGCTAT AACGCAATCA TTAGCAGCAG AACTAAAGAA  
20101 ATCTAAACAT CAAGAAGCAT TCCGTCTGTG GAATGAAAGC ATTGATGACG ATGGTTTGCT  
20161 GGAGGATTTT GAAGAATTGA TTAGAAAAGA TAAGGTGTTG AGCTCACTGT ATGATGAACT  
20221 GAAGCGTGCG GAAAATGCTG AATATGACTG GGAAAGGTGT TGTACCGATG AAAAAATACA  
20281 AGAAATACTC CAGATCAACT TAAAGCAGGA AGGAATCATG TGCAAAAGTT ACAGAGTACT  
20341 GCTGGCGTAT ACGTATGATG TGAACATTCG GGTGTATGCC AAGAATGAAG ACAATGAAAT  
20401 CGTTCTGATA GAAGATCATA ATCCAAAATC CATTAAAATT ACACACATTT TACACAAATC  
20461 GAACGAATTC ATTCAACTGA AAATCAATGA AAGCTTCCGC CAGTTAGAAG AAGAGCGTCT  
20521 GCACAAGGAT CGAATTTTCA GACGAATTCT GACGGAGATA AACGGAATGC AGGACATACA  
20581 GACCATCGAG AATTACTTCG AACGAGAAGT ATTCTATCGA AACAGTTCTA ATTTGCTTAA  
20641 AATGTTTGAA GATTTAGAAG ACGAGATAAC AGTTGAAAAG ATTGCAGCAT TTTTTTCAGC  
20701 CGATGAGAAG GACCAAATTG CTCATCGTCT GAAGAACATT TCTCCCAAT ACACCGGCCA  
20761 ACATGGAGTG TTCGAAAGCA TCTTACTGCG TTTTTCTTTC GAAGGCAGCC ATGTGTCATC  
20821 AAACGAACTG TGTTTCTTAA TCAACTCTAT ACTTGCTCAC ACTGTTGAAG CAAGGCAAGA  
20881 AAGGTACACC TTTTCATGGA TTGTTGCAGC ATACAATCAG TGCAGTTGGA CAGATGAGCT  
20941 GGTGTTGCTG CAGCTGGAGA ACTGCTACAA GAGACAGCTG CAGGAAAAAC CCAAATGGCG  
21001 CAAGTACATG TCAAAAATCG AAAATAAGGC AGTTTTGTTA GTATTTTCTG TTCAGTTTAC  
21061 TCGTAAGCCT TGTCCTGCGC AGTGTGTTGA AGATATCTTG CACTTGCTGA GTAACATTCC  
21121 AATAGAATCG ATTTGTCTAG ATGAACTGGA GCTAACAGAG TGGCCTTATG TGCTTAAGGA  
21181 ATGCTATTGG ACACATAAGT TGAAAGCTCT TATAACGTGG GGAAATGACT CGGAAGCCTT  
21241 AACTTCTGCT TCGTTCTTCG TTCTGTCCAT AGAGAACACG TATGGAAACA AGTTGGTGGA  
21301 GAATTTATTT GAATCGTTGG TGGAAAAGCG CAGTGAGCTT ACGCATTCTA TGTTATTA  
21361 CGTGCTATCT TGCTTTCATA AACAAAAGTG GAATTTATGT GTTGATGATA TTAACCTTTT  
21421 AAGTCGATGT AGTATCAAGA AATGGATTAA ACATATGGAA GAAAAGTTCA AGATAAACTT  
21481 AAAGGAATTA AATATTTTAC AGATAGCAAC TATCATTAGA GGCAATGCTA ACACATCAAA  
21541 TAATATAGTG AAACATTTAC CTCAAATTGA AAATTCAGTA ACAAGCATTT ATAATAACAA  
21601 GAGAACGATA CACACGAGTT TGATATCCTC TTTTTTGCTC AACGACGTAG AAAAAATGGT  
21661 TCAAGAGTTC CATGTTAAGA ACCAGAAAAC GAATACAAAC ATGTACGAAG AAATGCTTGC

21721 TGTAATAGGT AGGGCAATTG AGCTTAAGAG AGGGTTTAAG TTACGAGACA CCCAGCTATT  
21781 GACAATTTTG GCCTTACTAG TCAACGATAA CAGCACTTTG GCACAAGTAT CTACAGGCGA  
21841 AGGTAAATCA TTGATCGTAG TAGCGACCGC GATCATTAAA GCGCTCCTAG GGGAGAAGGT  
21901 AGATATTATC ACCAGCTCCT CAGTACTGGC TCAACGAGAT GCTGTCACCA ACAATGATAT  
21961 CTACGAATTG TTTGGTCTTA GTGCCTCCCA CAACTGTAGC GAACAGATAG AGGAGCGAAA  
22021 GGAAGCTTAC TCATGTAATC AAATAATTTA CGGAGATTTG GCAAACCTTC AACGTGACTA  
22081 TTTATTAGAC AGATTTTATG GAAAGCATGT ATTGGGTGAT CGTAGCTTTG AAAATGTGAT  
22141 CGTCGATGAG GTGGACAGCA TGTTGCTCGA TAAGGGAAAC AATATGATAT ACCTGTCGCA  
22201 TGACATTGCT GGTATGGATA AGCTGGAATC GGTATACTTG TTCATTTGGC AAATGGTCAA  
22261 CAGTCCAACC GATCTTCCGG AAGATGTACA TATGGAAGCG GTTAAAAGAT CAGTTTTAAG  
22321 TGACATGTAT GCAATCATCC AGAAAGAGGA TATCCAAAGT TTGGACAATG CTTTGGGAAA  
22381 ATCGAATGTA TTGGTGCTAT GGGAGAGATT AGTTAAGTCT GGAATAATAA ATGACGCAGG  
22441 AAGATTACAA ACGAAAGCTA TTGATTCCAA CAAACTAGAA AAAGTACTTA CACCAGATTT  
22501 CACACAATAC AAAGATCGTC TAAGCTTCTT ACTTACGTCT TGTGTCGAAC GCGAAACGTG  
22561 CATCAAATA CCAAATTATC TAAAAGCATT CGTGGAGAGA CACTTGGACA GTTGGATTTT  
22621 AAGCGCCATA ACAGCACTGT ACATGGTCCC GGGACAGTAC TACGTGGTGG ATGTCGACAG  
22681 ATCTGGAACA AGTGCCGACC TTAATGCGAA TGTAATTATT CTCGACAGGG ATACGGGTAC  
22741 TGATCAGGTG AGCTCACAGT GGGATGAGGC GTTGCACCAA TTTTTCAGC TTAAGCACGG  
22801 TTGTAAGCTG TCAACCCAAA GCCTGAAAGC AGTTTTTATT TCCAACGTTA CATATTTGAA  
22861 AATGTATGAA CTGCTTTATG GTTTAACAGG AACGTTAGGA TCACAGAGAG AAAGACATCT  
22921 GCTTGAGGAG ATACATCGGG TTGACTTTGT TACTGTTTCT ACCGCCAAGT CGAAGCAGTT  
22981 TGAAGAGTAT GAACCTATCA TTTGTTTCGAG CAGTGAGGAT TGGAAAAAC AAATAGGACA  
23041 AGAGGTGAAT AAACATAACA AAATTGATAA AAGATCGGTC CTGATCATT GTGAGACGAT  
23101 CAGGGATGTC GAATCATTCC AGATGGTGTG TGATTCTGAG GAGCACTCAA ACGTTTACAC  
23161 TTATGTACGT GATTATGAAA CGTTTACTGT TGCGGAAGGG GACAGAAAAGT TGGAAACCGGG  
23221 ACACGTTATC ATTGCTACCA ATTTGGCAGG TCGTGGCACA GATATAAAAA TATCCGACGA  
23281 CCTTCGGAAG GCCGGAGGGT TACACGTGAT ACTAACATAC CTTCCGGCGA ACATTCGAAT  
23341 TGAAGAGCAA GCATTCGGAA GAGCAGCTAG AAGCGGAGAT AAGGGATCGG GTCGGATGAT  
23401 AATAATGATA ACCGATGGAA AAATGCACAA TCGTTCTATG ATATTTACCC TCAAGCAAAA  
23461 ACGCAATGTC GATGAGCTTT TCCGCATATC TGCTATAAAA ACTTATTACG AAACCACTAT  
23521 TAAAACAGAA GAGAGTTGTT TTGAAGCATT CAACGAGTTG TATGAGAAAA AAATGAAACT  
23581 TTTAGCTAAT GCGAAAGAGC CAGTGAAGGA TATTCTGCTC CAATGTTGTT TGGACAGATG  
23641 GTCGTTTTGG TTAGACGAAA ACAATGTACA GATAGGAAAA GCATCAGATG AGGCTTCCAA  
23701 GCGGGAAGTA AAACAACACTG TGGAGCACTT TCTATCACAA TTTGATGATC TGAAAGCAAC  
23761 GAGCGCAAAC TATTGGCCAG CTTGGGTTGA AGAAAACCCA ATGCAAATGA TCAAATTGGG  
23821 AAAATATATT TCACAACACG ATTCGAAGCA TCGCGATACA GCAATGCAAC TGTTTGGGAA  
23881 AGTTATCTCG AATGAACCGT GGTTTTGC GAAGCCGCTTAT TACTATCGTG CATAACACG  
23941 ATCGCTTGAC AACATGAACG TTGGCGACTT CAAAAAGGAT TTGCGTATGG CAGAAAAACT  
24001 CTTAAACGAT CATATAAAAT ATGCAATGCA TGCATCAGGT ATGGTGTGTA AGCTAAAGAA  
24061 TAACACACCA CCGATCGAGG GCTATGAAGA GCAAAAAGAAG TGTCTCATT ATCTATACTC  
24121 ATTGTTTATT CAATCCATAG ACGACATGTT GGGTCATGCT GTAAGTCCTG AATCGTTTTGT  
24181 TAATTATGAA ATAAAGGAGG ATGTTGCTGG AATAATCTTT GACGATCTTG TACGAATCGG  
24241 CATGATAAAG AAGGCTCAAG TAATCGATAA CATACCTAAT GATCAGATTC AGAGACTTCA  
24301 CGTCGAGTAC GGGATACCTG TAGATCAGTT GAAGAAGTTC TTAGCTCAAC ATAGGGGCC  
24361 TATCGATGAC AAAGAATTCC TTAAGCTAT TCGAGAATCA TTTTCATTT CAAGCAGAAG  
24421 CGAATTTTGG GAAACACTTA TTAACCAAAA GGCTCTGCTC AGTGTTGAAA GGTATGTTGC  
24481 GATCAATGAA GAACGGCTCA AAATAATGAA TCCTGCTCTA ATGAACGTT TGAAGGAAAA  
24541 GGTAGACAAA GGACAGCTGG TGAAGCAGT TGTTAAGCTA GATAAGCACC AGATCTTGTT  
24601 GATCCACGAA CAACAGTCAC AGTTTTACTA TGAGAAAAGAG AAGCTCATTG ATATGATCGG  
24661 TAGAACGAAG TATACCTCTC TTGAAGAAAA TGGTCTACTA TCATGCAACG AAAAGGCAAC  
24721 CATAGACCCA AGTAGAATTA CTGGTTGTGT GTTCTCTGCC TTTGATTCTA TAACAGTTCA  
24781 GGATATTACA AACAAGACAA GAATTACAAC GAGTGAAGCG AAAAATATCA TCGCAGAACT  
24841 ACTTAAGCGT AATGTTCTAC AAAAAAGGGG TGAAACGTTT GTCCTACCAA TGAAGTATGA  
24901 CGATAGCCAG GATGTCTTGC TTCCCACCTA TCCAGTGTAT GAGAGTGTCTG TTAGAAACGT  
24961 CCTTGCTTCA TGTTTTGCCT ACAGATTAGC TCTGAGAAAC ATTGACAGAC AACTAGAAGA  
25021 GGAGAAGTGT TCTGACATTC GTATAGAATT GAAGCCCAAT CCCCATCAA TGTTTTTTAC  
25081 CGACTTACTG GAGCATAAGA TAATACTCCC TCCTATGGCC ACGCATGAGA TCGATGAAAG



25141 TAAAATCAAG GCAATGTATA AAACATCATG GTCGAAAGGG GCATGGATAA GCATACTTTC  
25201 TAAGGATATT GGTGGTCTC AAGAATACAC CAAGCTCCTG GTGGATGTGC TGCTTAAAAA  
25261 CCGTTTTTATT GTTCCAAACC CCTTAATGGA ATTGTTGTTA TTTTCTCCTT CAAATAACAT  
25321 GTCTGAAGAA ATAAAGAATG CATTGACAAG CTACAGGTTT AATTTCGAAAG ATGACCCGAC  
25381 TAGCGTAGCC TATTTAAAAT CATGCATTGC ATCAATCAAT CAAAAGCATG GACTTCTTGA  
25441 ATCCTGCGAC GTTGGAGTTG CGATTGAAAA GTGGTTTTAAC AATCAATTGC TGTTAATTGA  
25501 AAACGGAAC GCTAAACATA TTGAGAATGT CTTAAGTAAG TCGAAATCGT CTCTAGCAGC  
25561 ATTAATGTT CCGCATGGCG CGCTGAAATC GATCATGGAC TTTTATGGTA AAGGAACTT  
25621 TGGAAGCATC GATGAGATGC GGATCTTCAT CACAAATGGA TTAGAGCATC TGTTAGAGCT  
25681 AGGAGAGAGA AAATGGACCA TGGAAATGAT ATTGAAAACC TCACTGGTGT TAGCGTTTGG  
25741 TGTAGCACAG ATAACAATTG GCGCTATAAT GGAGGTGTAT TCGGGTGGAA TGATGACTCA  
25801 CGTTGCCGGA GCTCTCATGG GCGAAGGTGT CAGCGACATC ATGTTTGCTG TGGGTTCTTT  
25861 TAAGTCAGGT CACTTCAGCT GGAAAGATTA CGGAAAGCAT AAGTTACAAA GTCTGCTTTT  
25921 TACGATCGGT ACGGCCGGTG TGGGAATGTA TCTCTCCAG GCGCCAAGA TGTCTCGCAT  
25981 AGGTTATAAA GTTGCTGGAC CAAGTCTCGA GTACGGTGGC AAACGGGTTG CCGAATCATC  
26041 CGGAAAGCAG TTAATCAAAG CAGTTGGTGG ACGGACGGTC GTTAAGGAGA TAGCGAAGTG  
26101 TGTGGCGCTC AAAACAGCAG AAAGTGTGCG ATTTGCTGTG GCAAATACGG CCGTGGATAC  
26161 GGTTGTTGAA AATCATCTGC AATCCATGTT GAACTCCTTA GCATCGGATA TTTTATCTGG  
26221 AGTTAAGGGT GAAGTAGCAA ATCATAAGGT TGCTACAAT TTGCAGAAAG CGTACGATCG  
26281 TTTAGGTGAA AATGATGCTA GAGCCCTCGT GAACGACTTG ACAAATGCAT GCATGTTGG

//

LOCUS 11 3071 bp DNA linear PLN 25-FEB-2004  
ACCESSION 11  
VERSION GeneMark.hmm v3.0 self\_training  
ORGANISM A.gambiae  
FEATURES  
CDS join(500..536,2282..2571)  
/translacion="MMMATNSATKAHAPCTSTMTSMTFGQKFIPTAPEKGSFPLDH  
GGQCRKLMFLFYMRCLRENADDNSACREESKAYLQCRMDHDLMAREDFSKLGYSSSEKS  
SENKPEQS"

ORIGIN

1 ACACACTTTC CATACACTTG CGGATAGTCG TTTTATCATT CACACACAGT TCCCCTTATC  
61 GCAACCGAAA TTCCCGTAAC CGTGGTCACT GGTGTAAACA AAAGAACACA TACACACGCA  
121 CACAACCTCTA CTTGGGCTCT AATATGCGTA CGAAAGGCAC GATCGAACGG TACCGCCTCG  
181 CTTGCTCTCC GGTACGGCGG CCACCAAGAA ACAAGAACCA CATAACACA CACACAAACC  
241 CGCGCGCACA AGCAGCAACC GTGTCAATGC GTTTTCATCC CCCCCTTCAG ACTGTTCCGA  
301 TACAAAGCGG CCCCTCCGCA CACACACACA CAGCCACACA GATTCCGATC GTAACGGGAG  
361 GGTAATTAATA CCGGAAACGC ACCGAAAAAC GGATGTATAT ACGTTGCCCC AAAATAACAC  
421 TCTAAAAGCG CACACACCGC ACACTATTGC ATTCGCGCTC AATGCACTCT ACGATCGTGT  
481 ACCTCACCTT CTTGCCACGA TGATGATGGC CACGAACAGT GCCACAAAGG CTCACGGTAG  
541 CGGTAGTTCT CGACGTCTC CCTCTCTCGG GCGTTTTTGT ACAATTTCTA TCTCATGCAA  
601 CGTTGCATT CATACTCAC CGCCGAAAAG CGCAATAGAT GCCGGACAGT GTTTTAGCAC  
661 GCACGAAACT GAGACAGAAC AAAAAAAGG TCGAGAATAA ACACGCGCAC AACAAACGAC  
721 TCCGTTCCGT ACAGGCGGAA TAAAACATA GCACTGACAG CCAGAGTGGC CAGATTATTT  
781 TTGCGGTTTT CCGTTGGCGC ATCAAAATTT TATCGGTAGT TTTGCGTAGG AGTTTAAAAT  
841 TTTTCGGTAG TTTTCGGTAG GCTTTGAAGT GTTTAGCGGG GGGGGGGGGG GGGTTGTCGG  
901 AGATGGAAGC TAATCTGTCC CAGATGGAGC AGCACGAGAA AATAACATCT TTCATTTATT  
961 TAAAGGTGAT AGTTTAGATT TGGTTCATAG CGGTCACATG AGGCCTTTCT GAAGTGTCGA  
1021 TCTGAAAATT GTACTAGGGA ATTTAACCCA ACAAATGATT GGGACGCTCT GGCAGCAATC  
1081 GAACGCGACA TCAAACATGA AAAATATATG AGATTTTACA TGTCCGATGT GATAACCCAC  
1141 AAATCGAACA TGTGAAGTCC TATACATTTT TCATGTTTGA TGTCGTGTTT TATTGCTGCT  
1201 AGAGCGCCGG GTTATATTAT CTGTCAAATT GCATATAAAA TTTTATCAGC GCGTTCTACT  
1261 TCATGAAGTG CAGACACGGA CCTTAGTTGT CTCTGTTGAA CTTCTGGTTC TGTTGCCAG  
1321 TGTTTTCCAT ACATTAATG ATTTGGGAAA TGTTTATATG ACTTTTTGGT TAGTATTACG  
1381 AAAAAATCTG TAATTTTCGG TAGGATAAAT GAAAAATCGG TATTTTTAGG GGGCTCATCT

```

1441 GTGAATCGGT AGGCATATCA CAAATCGGTA GGAATACAGA TAAATCGGTA TTTCTGGTCA
1501 CTCTGCTGAC AGCTGACAGT TTTGGACGCG TTGACAGCGT CGCTCTGTCT CGCTCTCTTG
1561 GCCAGCCTTT CTCGCTCTTG GCTTTTATTT GGATTGAATT GCGTAGTTTT CGCAGAAATT
1621 CTACTATCGT GCTCAGTGAT GTTACAAAAT GCAAGGAACC ACACGATATT TCCATTTTTT
1681 CTTAAATTTT GATTCTCTTT TTCCGTTATT TTGCTTCCTT TCAAATCATT CCGCCCAACG
1741 GACCAAAGGG GATATTTTTG AGCTGTCAAA ACCTATCAAC AAAAAATATC CCAAATAGCT
1801 CCAGCTCGGA TGGAGGTGCG GCGAAACACG CACGATTAAT GGAAAAGTTT ACGAGTTTTT
1861 CTGCATAAAT TATTGTGTGC GAATGTTTTA CATACTGGTG GAAGTGTGTG CATTGTAGTT
1921 CAAGCCCTAT TTGCTGTAAT AAATTCGATT GAACCTCAAC GGAACAGAAG ACATGAGGTT
1981 TATGTAACGT CGGTAGCGGC AAAACAACGA GGTGAGTTAT CGTTTGTGTA AGCTGTCTAA
2041 TTAGTTTGTG TGACCAATTT TGTGTTAAAT TACATTAAT ACTCTCGTTT CAAATGGTTT
2101 CATCATATAG CTTATGCCAC ACTTGCTTTT AACAGCGTAA GGAAGGCTCT TCCTCCTCCC
2161 AAAAAATAAC CAAAACAAAC CATGCACAGG GTGTCTCGGA ACGCATCCCA AGAACCGTCC
2221 CTTTTTGCTC TGTTTGCTGC AATGTGCATT AAAATTTTCAT TTCCATAAAT TCCAATTCCA
2281 GCTCCCTGCA CCAGTACGAT GACGTCTATG ACATTTGGCC AGAAAAAGTT TATCCCCACC
2341 GCACCGGAAA AGGGTAGCTT CCCGCTGGAC CACGGCGGCC AGTGCCGAAA GCTGATGCTG
2401 TTCTATATGC GCTGCCTGCG AGAGAACGCC GACGATAATT CTGCCTGCCG GGAGGAATCG
2461 AAAGCCTACC TGCAGTGCCG CATGGATCAC GATCTGATGG CACGGGAAGA CTTCTCCAAG
2521 CTAGGCTACA GCAGTGAGAA AAGCAGTGAA AACAAACCGG AACAACTTTA ACATCCCTAA
2581 ACACCAAAAA CCAGAAATAG AGTTTAAAGC CCCCGGGTCT CGTGTAGTGC ATTTTGTTCAT
2641 TGAACGTTGT TAGAAGAAGC TCTGTGAAGA ATACCCTCGA TAATAGTAAA CCAATAGCAC
2701 CGAATCGAAA TGAAGGTGAA GAAAAACATC CTCGTCGGCT GTACCGGAAG TGTGGCCACG
2761 ATCAAGCTTC CCCTGCTGGT GGAAAAACTG CTCCAGCTGA CCGAGTTCGA GGTGGAAGTA
2821 CACGTGATCG TAACCGAGCA TGCCCAGCAT TTCTTCTCGC CGCAGGATCT GCCCGCCGCG
2881 GTCACACTCC ACACGGACGC GGAAGAGTGG ACGAGCTGGC AGAAGCGGGG CGACCCGGTC
2941 CTGCACATCG AGCTGGGCAA ATGGGCCGAC CTGCTCGTGA TTGCACCGCT CGATGCTAAC
3001 AGCCTCGCCA AGATGGCCAA CGGGCTGTGC GATAATTTGC TGCTCTGTAC GACACGCGCC
3061 TGGGATCCGA C

```

//

```

LOCUS          12      1347 bp      DNA      linear PLN 25-FEB-2004
ACCESSION     12
VERSION       GeneMark.hmm v3.0 self_training
ORGANISM      A.gambiae
FEATURES
  CDS          500..847
               /translation="MFRKAKQTIAPLPKPPEAQMLEDLQLFHETRSTVSPACKEN
               LPTLTEESTMDEWWKVYDASVQQHEQFFDQKTNALELKQSLQEMRSELQAVCDKLMA
               EIEQDLGRIAATMSE"

```

```

ORIGIN
1 CCCGGTTCAC ATTCCCCACT TTACCGATTG CACCAAGTTC TACAAGTGTT TCAACGGCAA
61 AAAGTACGAG ATGGACTGCC CGGCCGGTTT GCACTGGAAT ATCGAGAAAG ATTTTTGTGA
121 CTTTCCCAGG GAAGCTAGCT GCGAACGGCC GCTGCAAATC GACCCGTAAT GGTTTCGATCA
181 ATTAAGTGAA TAAAATCTTT TATTATCAAA ATTAAAATGT GGTTAAAATA GTTTTCTGTG
241 TGCGATATAT TTGACAGTCA CTGTATATAC AAATTTGAAA TTCAAATTTT AAACCATGTT
301 GGCATGGATT TGGCTAGGAA CAGCTATACG TGCTCAAATC TCAACTCAAC CCAACTGACG
361 CGTAAACGCG TTCGCGTTGA CAGCGCAAAG TAAACACAGG CCCAAAAGAG AAATCGTACA
421 AATCATAACA ACGTACCCAA GTTCTGTGAT AAATTTGTCC TGCCCTCGTG AAACGTGTAG
481 TGCGTGAATA GATAAACTA TGTTTCGTAA AGCCAAACAA ACCATTGCTC CTCTCCCGAA
541 ACCACCGACC GAAGCACAGA TGCTGGAAGA TTTGCAGCTG TTCCACGAAA CGAGATCAAC
601 AGTATCGCAA CCCGCCTGCA AAGAGAACCT ACCAACCCTC ACGGAAGAGT CGACCATGGA
661 CGAATGGTGG AAGGTGTACG ATGCCTCGGT GCAGCAACAC GAGCAGTTCT TTGACCAAAA
721 GACAAATGCA CTGGAGCTGA AACAGTCGCT GCAGGAAATG CGAAGTGAAT TGCAAGCAGT
781 GTGCGATAAA TTAATGGCCG AAATCGAGCA AGATCTGGGA CGGATTGCTG CCACGATGTC
841 GGAATAGATT GCTGCCTTTG GAATGGTTTG AATGGATGGC TAAAACGTTG AATTTAAAATA
901 TCTACTGTGA TGAGCCTAAC GGAATAAAAC TACTACGGGT TAACTGTAAT CCTGAATCCT

```

961 GTGGTTTTAT TGCTTTACTC TTTGTATGCC ACCAGTGCCG CGCTGGTAAG TACGTGATGT  
1021 GTGTATCCTG TCTCTGTGTA AGCGCGCATT CCGCGCAAGT CGTTCAGTTG TTCGGGTACA  
1081 CGTGGCCACA GACCGACGAC AGCCACTTCC ACGGGTAGCC TATGGTATGG AATGGGGGGA  
1141 TGGAAAATGG GGTTCAGGGT TGGAAGTCGC ATGTTTAAGG GTTGTCTTCG GTTCTTTGCC  
1201 AAAAAACACAG TCGGCAGTCG CCTATGCACT ACACACACCC ACCCAACTCC CCGTTACACA  
1261 GACACACATT CCATGCTAAA GCCCTTAGTC CTAGTTCCAT TAGTACGCGT TGCTGTGTCC  
1321 GCATTACAGT GCCAGTAATA TTCACAC

//

LOCUS 13 2598 bp DNA linear PLN 25-FEB-2004  
ACCESSION 13  
VERSION GeneMark.hmm v3.0 self\_training  
ORGANISM A.gambiae  
FEATURES  
CDS CHR ---  
join(500..538,1678..1851,1961..2098)  
/translation="MGEQGMVQEGEDVNVPKQRRTYCKKCKVHRVHKVTQYKKSKE  
RQAAQGRRRYDRKQKGFGGQTKPIFRKKAKTTKKIVLRMECVECKYRKQTPLKRCKH  
FELGGDKKRKGQMIQF"

ORIGIN

1 GAAGAAGAAG AAGAAGAAGA AGAAGAAGAA GAAGAAGAAG AAGAAGAAGA AGAAGAAGAA  
61 GAAGAATAAG AAGAGGAAAA GGTAATAATT AATGTAATCC AACATTCAAC GGAGCGTTTG  
121 GAGAGCTACC ACCACCACCA CTACACAGGG ACACCCAGGT TAATGGGGGA AAGAAGCCAG  
181 GGATGGGCAA CATGACACCA AGGGGGGAAA GAGAGTGAGC GTGAGATTGG AGAATGTCCA  
241 GCACAAACAA GCCAGGAAAA TATGGAAGGA ATTGAGGGGG CAATGGAGGG TTGTGATCTC  
301 ACACCGGGGT GGTGATTGCG GTGTGTTTGG AGTAAATAAA AAATTTCTAC TCCAATCAAA  
361 ACCATAAAAT GACAATTTAT GTGCGAAGAA GACGCTCTCC AGTTTTGCGT ACCGCAACCG  
421 ATCGGCCCCG AAGGAGTGCG CGCATGGTTG TCCTCCAAA AGGAAACGGA ATGGAAACGG  
481 ACGAACGGTA CAGCAAACGA TGGCGGAGCA GGGAAAGATG GTGCAAGAGG GAGAGGATGT  
541 AAGCGAGGCG CCAGCGACTT TATATTCAGG CCGAGATGTA AAGTGTGAGT ATATTTGTCT  
601 CCGTGTGTGT GTCGGTGTAT GTGTGGTTCA AATTATGGAA AGAAGTGGAC GATAAGAAGC  
661 GCAGGACACA CGGACCGATC CAAGCAGTGA TTGCTTACCG ACGGGTTGAC GATTACCACC  
721 AACGGAGGAC ATTACGGTAA TGAGTCGGCA GTAAAGGTGG TCTTATGGAT ATTTGATGCG  
781 GTGTCTCGCG GTGACATTCA CTCTCCTCCC GAGTGCTAAA TGGCCAAGTG TTCCCGTGTA  
841 CGGGTCGGGG TAAAATCGGA CAAATCGGGA AAGCAATTCC CGAGCTACAA GTGTTTCGCT  
901 TTAGCTGATG GGAACAGTAA ATTGGTGTCC AATTTCCACT ATTCAGCGCG CTGCGATTGT  
961 TGGTCTAGCA TGTTTCATTA CAAAGGACAA CACAGTGTGC GTTTGAAAGT TTTGTTGGGG  
1021 TGTTTTATCT ATTCATTTAA AATCATTTTT AAAATACGCT CCACAAACGC AACAGAATAT  
1081 TCTGTAAATA CATATTTGCC ATTATGTAGA AACAAAATTA AATTGCTTGT TTTATCGTTA  
1141 GATTGCGTAA AAGAAGCATA AAGTGAACAA TTTGAGGAAA ATCATAACAT ATTCCCCTAT  
1201 CACATCTCTC CGAACGTTCA TCTTGAATCA TGTTTGAATT CATGCTCGAA TTCATCTTCG  
1261 TACGCTTGCT TGAATGTTCA TCTCATATCT TGAATTTTCT TTCAAATTGT CAATCCCAGG  
1321 AACAGGCGTT CTGTCATCTG TCGTTGGACG ACTGACGTTT ACCGCTTGCT CTGTGCTTCC  
1381 TCTTTTCGTT TGTGACTGAA TCGACGAGAA CATCCAAAAT GGTACGTGAT GGCTAAATTT  
1441 CGCGATATTT TTGCCCTTT GCGCGTTATT GAAGGTGCAA TTGCTATGCA ATGGTCAAGC  
1501 CAATCATTCC GCAAGTGCCG GAAATGAAG CGTTCGGTGA AATGGACGTT CGAACGATGA  
1561 ATTAGAAACG ATGTTTACTG GCACCGATTT GTGTCTGTGC GGGATTCTAA GGTATGTTG  
1621 TGCGCCTATA CTAATCGGTT TGTGGTCCAC GTGCCTCTC TCCTCTGTTT TCTGCAGGTA  
1681 AACGTACCGA AGCAGCGCCG TACGTACTGC AAAAAAGTGA AGGTTACCG CGTGCACAAG  
1741 GTGACGCAGT ACAAGAAGTC CAAGGAACGA CAGGCTGCCC AGGGTCGTCG TCGTTACGAT  
1801 CGTAAACAGA AGGGTTTCGG TGGTCAAACC AAGCCCATCT TCAGGAAGAA GGTAAGCAGA  
1861 CCGGCGAACG GTTGTGGGGT GTTCCGCGC CGAGGACACG TTCGCTCTCT CACTCTCTCA  
1921 CACTCACCGT TCGTGCTTTT CCTCTTCCAA ACCCTTCCAG GCCAAGACCA CCAAGAAAAT  
1981 CGTGCTGCGT ATGGAATGTG TCGAGTGCAA GTACCGCAA CAGACCCAC TGAAGCGCTG  
2041 CAAACACTTC GAGCTCGGCG GTGACAAGAA GCGCAAGGGA CAGATGATCC AGTTCTAAGC  
2101 TGTTATCTAT CGCCTCCGGA ACGTGC GTTGGTGC GCGCATTCCG TTGTACTAAC GCATCTTTCT  
2161 GAAAAAAGAA GCATCGGGA TAAAAGATCA GCCCCTGTCC CCGGCGTCTT CGACGAGCAA

2221 GGGATGATGT GAGGACAAAA CAACTCAAAC GCCTGTACTG TAGTGATGTG TGCCTATTT  
2281 ATTTAAGATA TATCACCGGT TGGCTGTGCT TTGCTCGTCG GAACTACCGC TGCTGGTGGT  
2341 GCCGTTGTTG GTGGCCTCAT TTTCCAGCAA CGATTGCCGT ATCAGCTCCG CCATCAGGTT  
2401 GCATCGCATC GGTTTGTCAT TCTGGCAGCA GAACTCCTTG CCCGCCGAGA GGTTGCTGTT  
2461 CACCCAGCGG GGCACACAGT TTTGGTAGAA CAGGTAGGCT CGCTCCCGGA AGCAGTCCCG  
2521 ATCAATGGTG GCGCAGATGA CGTTCTGCGA GTTGTGCAGA TGCTTCACGA TCGAGTCCAA  
2581 ACATTTGTTT GCACACTG

//

LOCUS 14 1386 bp DNA linear PLN 25-FEB-2004  
ACCESSION 14  
VERSION GeneMark.hmm v3.0 self\_training  
ORGANISM A.gambiae  
FEATURES CHR ---  
CDS complement(500..886)  
/translation="MADDHSDSSLTSIDDERTDNTENLCENPTRDILTEGFFRLFKP  
VIDDLENNIRGASKTQSELRQOLEELSGEMKNLNFENDPVLHEYFKRMVRVKQKVVV  
IMNILQGAQERLVTLCQQQELQTPVPGT"

ORIGIN

1 CACTGAACTA CATCAAGGAA GAGAAGGAAA ACGAGAAGGA TGAGGATGAG AAGAGCACAC  
61 TGCATACGGC ACTCGGAATC GTGAGTGATT ATCTTTTCGCT CGAGTTTCGGA CGGAAACTTT  
121 CGGTGGCGCT GGGATTCCCC GAGGATGAAA ACATCTCCAA GAAGCGCAAA TCCGTGGTCG  
181 ATCTGGAATC GGCCGTGGTG AAGCGGATTA AAAAGGAGGA AAATCACGAT ACAACCCCCA  
241 TAAAGCTACC GGCGGCTGAA AAGAAGGTCT CTGCCAAGGC GAAAGCGCTA GCCAAGGCGG  
301 CGAGTGGGTC GAAGAGTATT TCTAGCTTCT TTAATAAATA AAATCCCCC TCCGTGTGTT  
361 AGGTGTGTTA CGTTAAAAGC ATTATTATTA TTATTACGTT ACATTAGTGC GGAAAGCAAT  
421 GGCCTCTTGG TGGATGGAGG AAAGCTGATG GCTACGAGGA ATAGTAAATA CATAATTCTT  
481 TGGTTCGACG TGTGCCTCTT TACGTGCCGG GTACGGGTGT CTGCAGTTC TGCTGTGGC  
541 ACAGCGTCAC TAGCCGCTCC TGCGCACCCCT GCAGGATGTT CATTATCACA ACGACCTTCT  
601 GCTTTACGCG CACCATACGC TTGAAGTATT CGTGCAGCAC GGGATCGTTC TCGAAGTTGA  
661 GATTCTTCAT CTCACCGGAC AGTTCTTCCA GCTGCTGGCG CAGTTCGCTC TGTGTTTTGC  
721 TTGCCCGCG GATGTTGTTT TCCAGATCGT CAATCACTGG TTTGAAGAGC CGGAAGAAGC  
781 CCTCCGTCAG GATGTCCCGG GTCGGATTTT CGCACAGATT CTCCGTGTTG TCCGTCCGCT  
841 CGTCGTCGAT CGATGTGAGC GAACTGTCCG AATGATCGTC GGCCATCGTG GGTGGGAATG  
901 TTTCTGCACA AGGAAGTTTA TTTGTAGATG AATAATAGAG CAAATAAGCA AGGATTCATT  
961 CGGCAACGGC GATCGAAATT CACCTTTTTG GAAAAAGGGG CGATTTTTTC CTCGGTTTTG  
1021 TGTTATTTGT TATCAGTTGT TTGACATTTT TGAACCATTA GCATAAGGTG TATAAATAA  
1081 GCTGTGTTGA AATGTGACAG CAACGCAGTT GACGTTACAG GTGTGCCCAA ATCGCCGTTT  
1141 GTTTTTACTT TTTTAAATGT TTAGCAACAT AATTATAATG TAACAAACAC TTTAATAAAT  
1201 ATTATTCCCC CAATAGTCCT CCTCCCATGA GAAATCTTTG GTTTTGGGCG TGACAGAACA  
1261 CGTGCGAAAG AGATAGAGGG CGCCACTGGC ACTCGCTGTG TCCCAATCTG CCAAACACC  
1321 GTGCTGAAAC CACGCGGTTT CCATTCGCTT GTTATTCATC TAGCGTTTGC GGCCAATGAA  
1381 GCTAGC

//

LOCUS 15 1407 bp DNA linear PLN 25-FEB-2004  
ACCESSION 15  
VERSION GeneMark.hmm v3.0 self\_training  
ORGANISM A.gambiae  
FEATURES CHR ---  
CDS 500..907  
/translation="MSLFTSSNSRPRSLMEALLAKKIEAASQQTGPGGSRRLIRTD  
DSTSSIGSHGSLILGDDVCRCDCLLGIVDRYTIGPKETASGIKKVGENVLATGSEV  
VVIDLRQNDFAKSCYFCSSSTNIVGKLCQSVILA"

ORIGIN

```

1   CCTTAGCGAT TGTTGTGTTA TCAAGGAGGG GACCCACACC GAGGGCCGAT CCCGACCGTT
61  AATACCCATT CGCATCCAAT CTTTTTCCCC CTCCCGTCGC TAGGTTTACG GTGTGCAATT
121 AGGTGTGATC ATCGATTAAC CTTTGTGTGA GAGTGAGCAG AGCCGGGACG TTAATTACAC
181 AACGACGGTT AACGATTACA ATTTAATTAA TTGCTTGTGT GATGTGTGTT TCGTGGAGTT
241 ACTGTTTAGC GTGCACGCAC TGGCTGTACA CTTCCGGTGC GTCGTAACGC CGCCCGGAGA
301 AAAGTGCACC ACGCTCCCGC CCAAGGTTTC CTCCGGCGGT GCCCCACCAG ATAAAGCATA
361 TCGAAATAAT TCAGCCATTG GGTGCATTTG TGCGAGTGTG CGTGTGTTTG TGTGCGTATG
421 CAAAGAGAAG ATAAAGGGAA GGAGTGCCGC CGTTGAGAGC AGAGTAGTGT GTTGAAACTG
481 TGATTGCCAC CGTCGCACAA TGTCGCTGTT TACGTCGAGC AACAGCAGGC CGCGATCCCT
541 GATGGAGGCG CTGCTGGCGA AGAAGATCGA GGCAGCGTCA CAGCAGACGG GCCCGGGCGG
601 ATCGCGGCTC ATCCGGACGC ATTCGATGGA TTCGACCAGC AGCATCGGCT CGCAGGGATC
661 GCTCATACTC GGTGACGATG TGTGCCGGTG CGACGACTGC CTGCTCGGGA TCGTCTGATC
721 CTATACCATC GGGCCGAAGG AAACGGCGAG CGGTATTAAA AAGGTAGGCG AAAACGTTTT
781 GGCAACCGGG AGCGAGGTGG TTGTGATTGA TCTGCGACAG AACGATGCGT TTGCGAAGTC
841 TTGTTACTTT TGCAGTAGTA GTACAAACAT TGTGGGCAAA TTGTGCCAGT CGGTAATACT
901 GGCATGATTG ATCATATCCA TTTGAGCAAC ATTAAGTAC  ACGATGTACG ATCGCAGTCA
961 GCATAATGTT TGGAACGATT TCGGTCAGAT CTTTTTACAAA TCTTTTTTCTC ATTTAGGCTA
1021 TATCCAGTAT GCCAAGGTTA CGACCGGTCG TTGTTGCTAA TTAATTATGG CGTTGATATG
1081 GGATCTATTC ATTTTGAGTG GCCATTTTTA TGAAATTGAA ACCTCTGCAT TTGGTAGCGT
1141 AAAAAATGTC AAAACATTGT TCAAACTAA TAACAACGAA AAAATATGCC TGCTTGAAA
1201 AGGTCAAGAT GGGGAAGAGC GAAAATAAAT TAACAGTTTT ATCTGGTGTG AGGTAGATAT
1261 TAACCTGTTG TTGTTTAAAG CATCAACTTG CATTGATGTT TCATTTTTAT ATTGACTCAA
1321 TTTATTTATT ATAATTAATA TAATCCAGAA ACAACGGAGT ATGGCATTCA TCATAAATTG
1381 AATTTGAGGA GCGTCTTAGT TTTGCCT

```

//

```

LOCUS           16           1506 bp           DNA           linear PLN 25-FEB-2004
ACCESSION      16
VERSION        GeneMark.hmm v3.0 self_training
ORGANISM       A.gambiae
FEATURES
  CDS           CHR    ---
                complement(join(500..883,965..1006))
                /translation="MKFLLLALSVMFMLVTASTAQSSKPAAVVQMOMTVGKLLMLVRD
                LSVANNAFAKDTEDQ TALNTLYTTSEDLYQLLPVFGSSSTSTLPLVTRERVRNVRVITN
                FKDALTKWESAMDERSAPNLVSTFKAVENAFSLGCVVFSL"

```

ORIGIN

```

1   AGGTTGCGCT TTTGGAAATT GCTTTAAAAG AGCCAATTGG ACGTACATTT CCAATTATTA
61  TTCGGAGTTA CTTGGAATTA CGTAGTAGCA GTACGATCCA TTTCATCTTG TGGGTTTGCA
121 CGTGTTTAAA CAATCTATTT GCAACAATTG TGTACACATT GCGAAAATGG ATGTATGAAT
181 TCCAAGACAT TGGTGTGCGT TTGCCAATTC TTTCCCGGAA CTCTTCTCAC TATTCCATTG
241 TGCACTGTGT AGCGATCTCC CTAGATCCCC TGGAAGATCT TCAGCTATAC GCCGACACTG
301 TATCACTGTG GTGGAACAGT CTGTTGACAC AGGTTGTTCC ACATGCTCTG TTTGCAGCAT
361 CGGTTGATGC TATGTACTAC ACGCACCGTT GTTCCAAAGA ATGTGTACCA ATATATGCCT
421 ATAACATAGT CTTTTTACAA CTGCACTAAA CTTAATCTAG TGCATTTATT ATAATTTTTA
481 CACATAGTCA TCTGTGATCT TACAGCGAGA AAACACTCC ACCCAAACTC AGGAACGCAT
541 TCTCGACCGC CTTGAACGTG CTCACTAGAT TCGGGGCTGA GCGCTCATCC ATGGCTGATT
601 CCCACTTAGT GAGAGCGTCC TTAAAGTTGG TTATCACTCT GTTCACCCTT TCCCGCGTGA
661 CCAGCGGCAG CGTGGAGGTG CTCGACGAGC CAAACACTGG CAGCAGTTGG TACAGATCTT
721 CCGAGGTGGT GTAGAGAGTG TTTAGCGCCG TCTGATCTTC GGTGTCCTTG GCGAAGGCAT
781 TGTTGGCGAC GGAAAGATCT CGCACCAGCA TCAGCAGCTT ACCGACCGTC ATCTGCATCT
841 GTACGACAGC GGCCGGTTTG GAGGACTGTG CCGTGCTGGC AGTCTAGATG GGATAGGAAG
901 AATAATCGAT TACAGTCACT GTGTTGCTAC TATAAAGGTT TGTTCAACGG TATCTGCAGC
961 TTACCACCAG CATGAACACG GACAGGGCAA GCAGCAGGAA CTTCATCACG GAGACACACG
1021 CGGCACAAAA CTGTGAGGTT GGATGATCGT TCGACAAAGC ACGGCACTGG TTTTATCAGA
1081 ATCGCCTAGA GGCCGTTTTA TTCATCCATT CCGCACCCCG GGTTCTGTTC GATCATGGCA
1141 TTGCGCACAG CACTGGTTGT AAAATACAGA TGTTTTTTGT TTGCACTTGA GAATTGTGTG

```

1201 AGATATTGAA CATGAGAGGG GGGTTTGTTA GAACTGTGCC TGAAGAGTAG AGGGGTGGTG  
1261 GTGATGTCTT TTTTGGGTT TATTTGGAGA TGTTTTTTTT TAAATATTGG GCGGTCCCGA  
1321 TCAATCACAC GCACGACACT TTAATTTTGT TGCAAAATGT TTTTTTGTTT CTAGTTACTT  
1381 AGTATAAAAAG GTGAAACCCA TTCGCCGTTG AAAAAACACA CTCTACACAC AGCTGAAGTT  
1441 GTTCAGTTAT GTCCTAAAAC TCCAAGCAA ATGGTCTGAA AACACGCAAC AATTCCATCG  
1501 GGAATG

//

LOCUS 17 2320 bp DNA linear PLN 25-FEB-2004

ACCESSION 17

VERSION GeneMark.hmm v3.0 self\_training

ORGANISM A.gambiae

FEATURES CHR ---

CDS complement(join(500..678,753..880,1675..1820))  
/translation="MSIKVGGAFRRSGGIVSAIGKQLKLVNLKGVQRITATFDPFDE  
SAVPTREFVHLSAPKISQTNPTCLLKTEVVCDRRPPSIVFQLIPSVQAEAKLKKIE  
LSSANLSTLELLKLCNKHVSALAPKEIATSVVKTSEKKAGGAGGGGKRR"

ORIGIN

1 ATTTAAACAA AAAAAAAGCA AAAACGACTG TTAAAAAAGT AGAAAACCTCT ACAAACCCCT  
61 TGTTTGGACA ATTTCTCAA GAAATCTACA CCCCTTTTTT AAAACAGGC ATTCGAGCGC  
121 TCGTTCGGTC CATTATTTTC CAGCTCTTTC GAACCGGGTG CCTTTATCAT TGCTACTATC  
181 TCTACTTACA TCGTTTCTTG CTTCCGCCGC TCCGCCTCTT CAGTCATCAC CTTACACCTT  
241 ATGTCTTCAT TAAAAAATAA AACCTTAGCA AACAATCGAC TAATCGACCG GCTTCAGCGT  
301 GATAAACCGG GACAGACCA ACACGACGGC AATGGTGGCC AGCACGAAGC AGACGGCAAA  
361 CATGTAGAAG CTCTCCTCGG TAAACACGTC GGTAAAGGCC GGTATCTGGT GGTACCAGTT  
421 CTCGATGATC GCCATGTGGC CGCCCTTTAG CTTCTTGTGC GGCATGGTTT GATGAGCTGG  
481 TTTGCTGACG TCCTTTTTTT TAGCGCGCTT TGCCACCACC ACCCGCTCCG CCCGCCTTCT  
541 TTTCCGACTT GGTCTTGACC ACGCTGGTGG CGATTTCTT CCGCGCCAGT CGGCTCACGT  
601 GTTTGTTGCA GAGCTTGAGC AGCTCGAGCG TGGACAGGTT GCGCTGCTC AGCTCAATCT  
661 TTTTCAGCTT TGCTTCAGCT AGGGATGGTA GTAGAGGAAA AGGGAGCATT AGGCTTGTTT  
721 TGAAAGGGTA GAACAGTACG CTTAACACTT ACCCTGCACC GATGGTATGA GCTGGAAGAC  
781 GATGGATGGG GGCCTTCGAT CGCACACGAC CTCTGTCTTG AGCAGGCAGG TTGGATTGGT  
841 CTGCGATATC TTCGGGGCGG AAAGATGGTG CACAAATTCT CTGCAAAAAG TAATGTGGAA  
901 AAGAATTCAG TTTAAGGAAA TGTTTTTGTT CGTCAACATC GTTCTGGGTC GCGCATTCTT  
961 CTCGAACGTT CTGGATTTCG TCTCACAAGC TGCAAAACCC TGCCGTTAAT GCTCTTTCTC  
1021 TCACACACGT GCTTGTTTTT TTTTCTCCC TCTGCCTTTA CAGACACGGC GCACGATTGA  
1081 GGCGAGGAGG CGGCAATGTC CACCGAACGG GAACTGACTC CCGGAACAAC GCAGCAGCTG  
1141 CACCCACTGT CCTACTCGGA TATGGCCACA CACATTCAAC TGAACGGAGT AATAATGGGC  
1201 AAATCATTCA ATGGTAAGCT GCCGTCCTTC CTTCTTATTA CCTCCGGCCG TGGCCTACTA  
1261 AATACTTTCC CGTCGTCCTG TCTCTTCCCC TGAGAATGGC TACAATTGTC CGAATCTACT  
1321 GTTGCGCCCG TTCTGCTCTT CCGATCGCGA TTCCTTACGT TGTGTAATGC TGCTGCTGCT  
1381 CACTTCTAAT CGGGGGTTTT TCACACTTTA ATCAGCCTCA AAAACGTACC CTAAAATTAT  
1441 ATGGAAAACCT CGGTGCCTCG GTCGTACCTT GTTCTCTGTC CTTAGCTGTT CGTTCTCAA  
1501 ATACACATCA CCCACCGACG ACGGCGTTTT GCGTTTCTCT CGCCCTGTGA CAGACGCGTG  
1561 CGCATTGGCC ACTTTCCGGG AGCGGGCCAT TTTGCATTTG GGGCGCGTTT GCGAGATGTA  
1621 GGATGGAACC GCGGGGGCGG GATGGGCAGC TGGATCACTG GTTACGGCTC TTACCTCGTT  
1681 GGAACGGCAC TCTCGTCGAA CGGGTCGAAG GTGGCCGTGA TGCGCTGCAC ACCCTTCAGG  
1741 TTGACCAACT TTAGCTGCTT GCCGATGGCC GATACGATGC CACCCGACCG CCCGAATGCT  
1801 CCACCGACCT TGATGGACAT CGTTACGCTG GAGGAAGTTT TATTGTTGCG CTTCTGCTG  
1861 AAATGGTTGT TGTTTGCCGA CTGCGTGTGC GGCAGCGGCA GGTTTCATAA CAATTCTCGT  
1921 TGTGCAAGGG TTGACGTTTT GGAGATCGGA CTCGTGTTTCG AAAATGATGT TCGAACTTGG  
1981 GTTAGGCAGT GCTCTGGCAA TTTGTGCGAT GAGACAAATG GTGCGTGACG AATGAATGTT  
2041 GCATAGGTTT TTTCTTGTTT TGTATAATAA AAAATCAAAA ATACTAAATT TTTTGAGGTG  
2101 GTCATTTAGA TACAGAAAAT TTATTTTAAAG AAAAGAGTTC AAATACAAAT AGTCTCGAAG  
2161 ATACGCCGTT CCACTTAAAT GCGGATTCGG AGATATGCGG CTTTCTAAAT TTGACAGGGT  
2221 TGAGCACATT GACTGATTT GACTCATCAA TTTTCAAATG TCAAATACTT TGCCTTTCGA

2281 TCGAACGTTA AAGACAGTTT TAAAAATGTG AAAACTGTTA

//

LOCUS 18 1556 bp DNA linear PLN 25-FEB-2004  
ACCESSION 18  
VERSION GeneMark.hmm v3.0 self\_training  
ORGANISM A.gambiae  
FEATURES  
CDS CHR ---  
complement(join(500..898,976..1056))  
/translation="MSTIYEAAATIKPKTPDEEEVLKLNLSIRPCYLYNEEYEDCTS  
VKARFHQYFIHGESIDCNQWKRDFDNCVRFKFNATDTKSALELIRSEQKRREERIRA  
HYGNNVWTKRTAPPQDWAKPLPEHMQKEYEGSFLASKAKELREGPQTPEVESSSSCA  
IM"

ORIGIN

1 GGGCGTTTAA ATTTAAGTAA GTTGGCCATG CTTTCAATCG CTTGGTGCAT CATTTCGTTT  
61 CCTTGCTTTC TCCTCCAGGG GCGATCTCAC GCTGCACATT CGCAAGCACA CGGGCGAAAA  
121 GCCGTTCAAG TGTGACATCT GTGGTAAAGC GTTCAACAAA AGCTACAACG TGGTGATACA  
181 CAAAAAGTCG CACCGCAATC TACCGCCGCC GGAACAGTCG ACGCTGCTGG CTGCGGAAAC  
241 AGCGATGCTA CCTCAAGGCG AGGTAAAACC GGAACATACG GCAATATAGC CGGCGCGGCA  
301 AACAGTGCAC TGTGACGATA TTACGCGACC GTTTTTTTGT GTTAGCTTTT AGTTCATCAT  
361 CCCAGATATA TATCATTTTT AATCTTATTA AACATAACTT TATTCACTCA CGATGTAAAT  
421 GACGGATGTT GGGGTTATTG CAACTGAAAA AAGTGATTTA AAAAATGCTA TTTAAACTTT  
481 CGTTCGCTGC GCCTTCTTGT CACATGATAG CGCACGACGA GCTGCTTTCC ACTTCGGGCG  
541 TTTGCGGTCC TTCCCGCAGC TCTTTGGCTT TCGACGCTAG GAACGACCCT TCGTACTCCT  
601 TCTGCATATG CTCCGGCAGT GGTTTGGCCC AATCCTGCGG CCGTGCCGTC CGCTTCGTCC  
661 ACACGTTGTT GCCGTAGTGG GCGCGTATCC GCTCTTCGCG CCGCTTCTGC TCGCTGCGTA  
721 TTAGTCCAG CGCGCTTTTC GTGTCCGTTG CGTTCTTCTC GAACCGCACG CAGTTGTGCGA  
781 AATCGCGCTT CCACTGGTTG CAGTCGATCG ATTCGCCGTG TATGAAGTAC TGGTGAACC  
841 GGGCCTTAAC GCTGGTGCAG TCCTCGTACT CTTTATTATA TAAGTAACAC GGCCGGATCT  
901 GGACGGGGGC GGAATGCCGG TGAGCCAAAA TTGGATTAAA TGCGGAACGA AAGCAAACCG  
961 CGCGGGTACA CTTACCGACC AAAGGTTTTT CAGCACTTCC TCTTCGTCGG GTGTTTTTGG  
1021 TTTAATTGTA GCGGCCGCTT CGTATATTGT GGACATGGTT GGTTATTTGT TGTTACAGTG  
1081 CGGCAGTGTG GGCTGGAAAC CCCGTTGCAA TCAATTTTGT TTATGTCCTT TGACAGTTGT  
1141 TGGACAAAAA CCAGGGCTAC ATTCACGCAC ATCGCTAGTT GGTTTACGGT GTAGGATTGA  
1201 GGTTAAAGGC TGAGAGGAAC GGGCAGCTTT TTGAACGCAA AATCAGTTGG CTGACTGAAG  
1261 GTTGAGGCCA CAGTTCGCTT TTCTTCGGTG GCAAATAACA ATAAGATATT AAATATGAAC  
1321 CAAAAATCAT GTTTTACAGC TTCATACTTG GTTACAATA TTATATTAGT TTTGTTTAAAC  
1381 TTTATTGACC TTTGCAAAAT GTTGCGTCTT GAAAAAATAT CTTAATACAA ATGAGTGACC  
1441 CAAAGCGTAA AACTGATCGA CGGATTAACT AAACCAAAAA GTAAACCATA CAATCTATGC  
1501 TTGTGCTTTC GCTTCCTTCA ACGCTTCCG CGCTTCTTCG TTTCCGGTGCG ATTTCT

//

LOCUS 19 1568 bp DNA linear PLN 25-FEB-2004  
ACCESSION 19  
VERSION GeneMark.hmm v3.0 self\_training  
ORGANISM A.gambiae  
FEATURES  
CDS CHR ---  
complement(join(500..670,745..1068))  
/translation="MFSNCQDVKLAYNEMPISLETVRFDRDSEGVCDTLHAEYEVRE  
SSDDVEWELIITTYQCEQQTAKICLDNPKEYIEPMHCDRFHSDNSGPWFFIASSMTN  
GDRCGRMTGRYNLDAAVLKIKYLEQYIAMGKGTYRVRMLFHIPGTNLDTLNVRCCE  
MDFDVID"

ORIGIN

1 CTTAATTGTA ACAGCCCAA ATGCGCTCAT TTGAATGTGT CTTTCGTTTT CGTCGTCCCC  
61 CCAGTGTGTT GTGTTGTTCA CCGAGACAAT AAAGCACACA CCACACGCAC CAGGCAGTTG

```

121 GTATTTGAAT CTTGAGCAAA ACAATTATTG TGATCGTACA GAATCGAAAA TTTTAGTTTA
181 AAGCAAAGCA CCACCACCAG TCAGTCAACC AGGCGTATGA AATATGTACT AGAAAATGCA
241 AGATACAGGA TACAAATACA ACAACCTATC GGAGCTTACT TCGGAATTGT ATCTCTTCTG
301 CGGCAAAGGA ATCTTATTCC AATCAGAAAC TCAACGCAAA GAAAACAGAT CAATGTGTGA
361 ACCAGGTGGA AGAATAACGA TCGGCGTTTT TGCAACCCCA TTTCCCGTTC TCGCTTAGCA
421 AGATGTGGCT TATTTAATGT TTATAGTTTG TACAGTTTCA GCATTTACGT GTTTGAGCAA
481 CTCGACCACG ATCGCACGTT CAATCGATCA CGTCAAAGTC CATCTCGCAG CAGCCGCGCA
541 CGTTCAGCGT GTCCAGATTG GTGCCAGGGA TGTGGAACAG CATCCGTACG CGATACGTGC
601 CCTTGCCCAT CGCGATGTAC TGCTCCAGGT ACTTGATCTT CAGCACCAGCA GCATCGAGAT
661 TGTAACGACC CTGTTCGATGA AAGAGAGAGA AAGATTGCAA TGACCATCCA AAACAGCTGC
721 TCTGTAACCG ACTTAATAAC ACACCGTCAT GCGGCCACAC CGATCACCCT TGGTCATTGA
781 TCTGGCAATG AAGAACCAGG GCCCACTGTT GTCGGAATGG AACCGATCGC AGTGCATCGG
841 CTCAATGTAC TCCTTCGGAT TGTCGAGACA AATTTTCGCC GTCTGCTGTT CACACTGGTA
901 GGTCGTGATG ATCAGTTCCC ACTCGACGTC GTCGGACGAT TCCCGCACCT CGTACTCCGC
961 GTGCAGCGTG TCGCAAACGC CCTCGGAATC GCGATCAAAG CGTACCGTTT CCAGCGAGAT
1021 GGGCATTTCG TTGTAGGCAA GCTTCACGTC TTGGCAGTTG GAAAACATGG TCATGTTGAC
1081 ACGCTGCAGG TTGGCGGGGA AGTTAGGCAA ACGTTTACAC TCTCCACACT TACTACTGATT
1141 TTCGCGCTAC TTACCAATCC ATGAGAAAGT TCAAAGGTAC CACAAATGAT AAGCACATAC
1201 AGCAAGATGC ACCTTTTGAT AGCCATTTTT CAAAGAAGGA AGTGAATTTA CCCTCCAGCT
1261 TCGTGGTGAG TAGTGAAATT GAGCTTCACT GCAGTTGTGC CGATCGCTTT ATAGTTATCA
1321 GAAGGTATCG GAAGGGCTTG GAATTCGTTT CAACAGCCGC TCCTCGGATA TAGTCATTAT
1381 TATGACGGTG CAAAATTTGC GTAAACGCTA TGGCTTACCG CATTTCGCGTA GAGCTGTAAT
1441 TTATGCGTAG ACTATCGAAT TAGGCGCACG TGCTCGCATT GTTGAAACGG GACAGAGCAG
1501 TTTGCGTTAC ATTGATTAAT ATATTAACCA ATAATTGATG AGTGTCTGTA TGGTTTACCT
1561 CAGGAGGG

```

//

```

LOCUS          20      1698 bp      DNA      linear PLN 25-FEB-2004
ACCESSION     20
VERSION       GeneMark.hmm v3.0 self_training
ORGANISM      A.gambiae
FEATURES
  CDS          CHR ---
              complement(join(500..643,715..1014,1106..1198))
              /translation="MGVNDAVNYVLFNNPVSSTVWSMAAQGARAAGLKPKAVTQTAA
              THTKAVVEQALPPMWKLLGHNHRHIVRLAGLSGAAAVILGAYGAHYHFTPKDEDIQR
              DPKQIFEMTNRYHFIHSLALLAAPFARRPYLTTALMASGMTLFCGTCYYVAFTNDRS
              VVRLTPMGGFLLIFGWLSFII"

```

ORIGIN

```

  1  GGATCAACTG CACCGGCTGG ATTGTGAGCG GCTGGCGTGG TGGCTTTGCG AGCGACAGCT
 61  GCCGAGCGGT GGCCTAAACG GACGGCCGGA GAAGCTGCC GACGTTTGCT ACTCCTGGTG
121  GGTGTTAGCG TCCCTCACCA TCATCGGCCG GTTGCACTGG ATCAGTTCGG AGAAGCTGGA
181  GAACTTTATC CTCTCGTGCC AGGACGCGGA GACGGGCGGA TTTGCGGACC GTACCGGCAA
241  CATGCCGGAC ATATTTACA CCCTGTTCGG GCTCGGCGCG CTGTCCCTGC TGGGCGACAA
301  GCGGCTGAAA CCGGTCAATC CAACCTTCTG CATGCCACAG TACGTGATCG AGCGGTGCAA
361  TTTGAAGCCG AAGGTAATCG TGCTGTAAGC GTCGCTTTAT TTTATCAATT CATAATCAA
421  ACGCGACTGT AACTAAAGT GGATCATGAA ACACGTTGAA AATGCTCTGC TCTTGCTTTC
481  CCCTCTGTTG TTAGTAAGCT TAGATAATAA AAGACAGCCA TCCAAAGATC AAAAGGAAGC
541  CACCCATCGG CGTGAGCCGG ACCACGCTGC GATCGTTGGT GAACGCCACG TAGTAGCATG
601  TGCCACAGAA AAGCGTCATT CCCGAAGCCA TTAGTGCCGT CGTCTGGTCG TCGGGGAAGA
661  GAGAAAGTAA GAGAGAATGT TCTGTGCATA GTCCTTCAAA TCGAAATGAC TTACCAGATA
721  CGGACGTCGT GCAAAGGGGG CAGCCAGAAG GGCCAACGAA TGGATGAAGT GATACCGGTT
781  GGTCATTTTC AATATCTGCT TCGGGTCCCG TTCCTGTATG TCCTCGTCCT TCGGCGTGAA
841  ATGGTAGTGA GCTCCATAGG CCCCAAGAAT GACTGCTGCC GCACCGCTCA GTCCAGCCAG
901  TCTCACGATG TGCCGGTTGT GGCCAGCAG CTTCCACATC GGTGGCAACG CTTGTTTCGAC
961  CACCGCTTTG GTGTGAGTTG CCGCCGTTTG CGTTACGGCT TTCGGTTTCA GGCCCTAGCG
1021 GGAAGGACG ACATCCAGGG ACAAAGTCAC AATGGTCGCA GGAAGCGATG GACAAACAGT

```



```

1081 TTGTTCAACT GCTGATTATA CTTACCGCAG CTCTGGCTCC TTGCGCTGCC ATGGACCATA
1141 CGGTGCTGGA GACGGGATTG TTGAAGAGGA CATAGTTTAC GGCATCATT ACACCCATTT
1201 TGCGGCAGAA TTATACGTTT GCTGTTGTGA AATGAGCTAT TTTTGCACCG TTTGTTGTGG
1261 ATAAACGAAT TGTCATTGTT GGTTGGGCGA GTTTAGAGGT TGTAGTTGAT TTCTTCGTGT
1321 GTGAATCTCC AGCAACGGAC CGAATCAAAG TGTCCTGGCG AAGTGGTTCC TGCTCTTGGA
1381 AATTGATAAA AACGGTACGA TATCATCTCG ATGCTCCTTT TTACATGCTG GCAACCACTT
1441 CTGCTAAAAT GTCTTCTAAT TTTTGTAGAG AATAGTGTGC GTTTCAGGAA CTACAGCTGA
1501 GCTTACTACT GGGTTGGAAG TACATCCCAC AGATCCTTTA TCGTGTAACC TTCCTTCAGC
1561 GATTCCATGG CGAAACCCAG CTCCTTGCG TAGACCGGTT TCCTTTTCGA ACCATCACCC
1621 GTAGCCGTAT CCGCCAGGTA AGCAGTAAAC TTGGAATTTA TGTCACCACC GGGCGTGGAA
1681 TCGAGCTCCT CAATGTCTG

```

//

```

LOCUS      21      5552 bp      DNA      linear PLN 25-FEB-2004
ACCESSION  21
VERSION    GeneMark.hmm v3.0 self_training
ORGANISM   A.gambiae
FEATURES   CHR ---
           CDS      join(500..521,3976..4250,4744..5052)
                /translation="MEKPINSDMLNLETGEIEYGTVGGYDRERIYLDKETGEVSSDP
                TEQAGSRRRRSKFHIPKQYLRNQCGLIIGRRPAAPAAPSVSCALMACKQKMIIPMMKEE
                ITVGYNSTAHLFLPLLFVTPKLFALVISFVEVMLHMWAHRKNSTNGNPDVYYRSP
                MHVVTRQFCEVCRHERLMGRVGLQDVRMKQMNYFRKVTRNIA"

```

ORIGIN

```

1 CTTTTCTGTG CCGTGTACAG AACCAAGAAG AAGACAAGTA CCTCTCTTCC ACGTCCCCAA
61 AAGCCCACGA TCGGGTTTTT TTGTGTGCTG CTAGCGATTG TTGGTGCGGT CCGTTGCGTG
121 TGCCATACAA TTGAAGGGTT GTGGCAGCAG CAGCAGCAGC AGCAGCAGCA ACAGCAAAAA
181 AGGCCTAACG TTTCAGCCAA CAATCAAGCA TCTTGTGCGT TCTCTTCTGT GGATAAAAAA
241 GAAGCAAAAC GAACCAGGTA AGTCGGTGCG CGAAGGCTTG AAAAGGTAAT AGATTAATAG
301 CCGCACACGG CCTGTGACTT CTGCGTGATG GCATCTAATT GCTGTGCAGC AACCAAATCT
361 TGTGGCTTTT GTCAATGAAG CATTTACATG TAGGTTTGAT AATTTGTGGT TTGAGTTTGC
421 TTAATGCATA TGAAGACGGG GGATACATAA ACAGTACATC ATTTGTCATT GGACGGTAGC
481 ACAAAGGACA GGACACCAA TGGAGAAACC CATTAAATAGT GGTATGTCCC TTGAACTTGA
541 CTTGGCAGAC CTTCAACCTT CAAAAGTGGT TGCTATCACA CGCTGATGGA ACAATTGTAG
601 GCTACAAATC TTCATCTCAA ACGTTGTGCG AAGGGGAAGG CGGCTCTTGT TTCTAAGGTG
661 CGCAAACGTA TGGCTCGGTA TCTTTGGCAT ACGAAGATAA GCATGCGTGG CATTTAATGT
721 TGCGCCCAGT ACCGCAACAC ATTGATTATG AGCGAAAACA GGGAAAAAAC ACAAATAGCA
781 GGTATCGCAC ACGAAGGGAT CACCAGGTCT CTTATCGTCT CGGTTCAAGT CCGTTGGTAC
841 GCTGGTGATA CTCTTCAGCA AAATGACCAC GATTATGGGG GCTTAGCCCG TTATAGCTAC
901 TGCTGCTGCT GCTGCTGCTG CTAGGCTGTT TGTGAATCGC ATTTTGATCG ATCGGAACAG
961 ATAATAATTG GGCTTCATTT TCACTTTCAT GCTGGTTTGG TTGGCAAACA GCGTTAGCGA
1021 TTAATTTGAG ATTCCCCATC AAGTGAGGTG TTGATAATAG GAGGATTATT AGCACTGCTC
1081 GCAACGGAAA TCCCTGCTCC AAGATGGTTT TAATTGGTTT CATTCTCTTT TAATGGTGAT
1141 CCAATGGCCA AGAAGCACAC ACCAACATAA GAAGAAATTC TACTTGGTAA AGAAACATGG
1201 AAAATATATA ATGTGTGCTT TTTTCTTTCC TTTCGCTTTG ATAAGTTCTT ATCACCTGTG
1261 TTAACACACC TGACCTAAAA ATGTATTGCC GTCTGGGTGC CTGGTGCTTG TACAGCAGCA
1321 TGTTGAGAAA TCATTTGGAA AAGGAAATCA TTATTAATTT CCTCATTATA CTAGAATGTT
1381 ATGTGCTAAT AACTATATTC CGATGGTTTA ATGGCTCAAT AGGATTTCTT AGAAACTTGA
1441 GCTCTCTAGA ATAAGCGGAG AATGTTTAAG TATCAATACT ATGAACTCTC CCGTCTCCCA
1501 CGCGGTGGTA CAGTCGTCAA CTCGAACGAC TCAATAACAT GCCCGTCATG GGTTC AAGGC
1561 TAGAATGGAC CGCGCCCCC TTAGCAAGGA TTGACTATCC GGCTGCTTGT TAATGAATAA
1621 AGTCTCGAAA GCCTGTATAG GCCGCGGCAT GTCCGCCTAG GACGTTACGT CAAACAGAAG
1681 GAGAACTATG AACTATGAAC TCTTAATAAA AAAAAAAAAA AAAAACCAA AAAAAAAAAA
1741 AACAAAAGAA GACTCTGACC AACATCGAGC TTGACACTGT CACTTGTTTT AAACCGTATT
1801 CCTCATTACA AGTATTTCAA ACTAATGTCC AAAATTGTCC AAACCTGTAA TTGATGAACA
1861 GATGTTCTCG ACATCAGTTT TTTTGGAGA ACTTTTAGCT TTTTGTTC TTTTTTTTAC

```

1921 ATAATAGTAA AGAAAATAAT GACAAAGTGA TGACGAATTT CTCTATTCTG AAATGCCACT  
1981 TTGCAACATT TGCAACAATA TTTGTACAAA CAAGATCCTA CAAAGATCTG AATGAATTCT  
2041 TCAATATAGT TCACTCTTTT CTCCAGTCAG ACTTCAATTT TAGCAGCATT AATCAACACT  
2101 CGCGAGATAT TTTTCAAAGG GTCCAGCTGA CAAAAACACA GCCTGACAGC TGTCGAAAAT  
2161 CATCTCGCGA GCGTTGAAAG AATGCTGTTT ATATTGAGAA CTGACTCGAA AATCAGTGTA  
2221 ACATTGTACA ATTTTTGTTT TCCAATAAAA TGGATTTTTT GACGGCGCTA AGAATATGCA  
2281 AACGTATGCA CTTTTGCGAC AGTTTGTTTT TTACCTATAT GTCATTTATT AATGAGAGTT  
2341 GACGAACGAT CGTTGAAGCG CCCACAAATC GTTAACATTT CACACAATGC TAATCATAAT  
2401 TAGAAAAGAAA CAAAAAACAT CGTTGCAAAC CCTCTTATAC AATCAGTATT GTGTTTTGTG  
2461 TGACAATTTT ATTCCCCGGA CACATTTGCG GTCGCTTATA TGGGCAAATA AAAAGCCCTA  
2521 CATTTAGCTT AATGTTCTGA CTTACCTCCA CTCGCTTGAC AAATGATGAT GAGCGCTGG  
2581 GATGGCTTAA AAAGTGGCAC TTTATACCCC CCATAGACGG TTCTCGGAGT AGTTTAGGCG  
2641 GCACGAGCTA CAACCAGCGT CCAGAGTTAA CTCATTTGCG TCTTCCCAT TCTGTAGTAA  
2701 CCGATTTAAC AGCTTCCATC GTTACCGCGC CAACGTGACA CTGGTAAATG AGCGTTAATC  
2761 GATGTTTACT AAGAGCGATT CCATTGCATG GGTGATGAGA TTTTGCTTCC TCGTATATCG  
2821 TAGTACGCGA ATGGAGCGTG GCGTGTGGGT TAATTGCTAC GATCGTTAGG GTAGGGGCAC  
2881 ACACATGATC GCTTCAAGTG AGCGTGCCTT ACAGCCCATT CCGGCTGATT CGAACTTACC  
2941 TAAAGGGAAA ATATTAATAA ATTTGGACAAA GTTGGACCAT GGTCAAATTG TACCGTACCA  
3001 GGTGAAAAAA AAATCTGGGG ACTCCAATAT CCCTTACCGA TCTAACAATA ATTGCCATT  
3061 TTCATTACGC ACCATTATTA GCGTAACGAA TTGTCCATCA GCAAGGCCAC CGGATCCAGC  
3121 GCGTCCGTGC GGACCTCGCG CTGCAGGGTT CAAGGGTCCA GCAAATGCTT GCCCATTGCT  
3181 TCATTCTTCT TCTACCTCCT CCTCAGTCTC CTCGCGTGCA AATGTCGCAT GCTGATTAGC  
3241 GGTCCCGAGG AGACTAAATG AAGACGAGCA GTTCGCATCG TTTCCGGTGAT TCTCTCTCCC  
3301 CCCCTCAAAA CACCATCGAT AGCGATCCAG ATGTCTCACC AAAAAACGTG AAAAAGACAT  
3361 CACACACACA CACACACACG CACAAACATA CAGGCAAGTT TGCACATAAA TGTATGCTTT  
3421 ACGGGTCAAT CACGACCGCG CGGGTTGCGA AGGTTTCTCC TAGCTTGCGC CGTAGGAGCG  
3481 CCTTTGCACC TCAGACTTGC TCGGGGGAAC GTGCACCCCC CCCCCCACA TTGACCCAC  
3541 GCCTCGTGGA GAGAATTGAT GGAATTTTAT TGGATTGTTT TTGCTTGCCA CCGGTCTGGT  
3601 TCTCTGTGTC TGGCCGAECT CTAGTTGACA CACTGCTGGT TGTGTCCACG TTTTACGGTC  
3661 GTCGATCGTC GCGTTGGTAA TTGACGCCAT TTGCATAATT TACTACCAAC TTAGAATTTT  
3721 GGCTGTGCAC ACACACACAC ATGCATTTGG GGAACAAAAA CCGGGAAGGG AGAATAAAAA  
3781 ATAATGTGTG AAAAGCGTTT TCGTCCAGCA GATTGGATTG TTCGTGCAAT CAATCATTTT  
3841 AAAGTTTGCA CCGCTTCTTC TCCGCGCGAA GACGCAATTT AGTGCATATT ACACACACAC  
3901 ACTCACACTA GCAGCTCAAT CAATCAAGAT CATCCAAATC ACACAATTTT TCGTCTTTCT  
3961 TCCGCTTCTT TGCAGACATG CTGAACCTCG AGACGGGCGA GATCGAGTAC GGCACGGTCG  
4021 GCGGGTACGA TCGTGAGCGT ATCTATCTGG ACAAGGAGAC GGGCGAGGTG AGCAGCGACC  
4081 CGACCGAGCA GGCCGGGTCG CGGCGGCGGC GCTCCAAGTT CCACATACCG AAGCAGTACC  
4141 TGCGCAATCA GTGCGGCATC ATCGGCCGGC GGCCCGCGGC ACCGGCCGCC CCGAGCGTCA  
4201 GCTGCGCGCT GATGGCGTGC AAGCAAAAGA TGATACCGAT GATGAAGGAG GTACCTGTCA  
4261 AATGACATCC ATACACTCTA GGTACTCTAG GCTATTACTC TAGGCTACGC TCTGCTACTA  
4321 CTACTGCTAC CGAACGCGAT GGACCAAGGC ACGCCTGAAG GGGCGCGTGC GCCCGCGGAC  
4381 GAGGTACAGA AGACGAACGT TTCGTGTGTT ATCCTATTTA ACCTTTGTTT TTTTGCCCCC  
4441 CCCCCCTGTA GTACTAGCCT TAGTAAGCTT AGTGATAAGA GCTACCGTGT AGTGTACGGG  
4501 AGTGAATGTT TGTGGGTGTG TGTGTGTGTG TGGGGATGGA TGTCTGTATG TGTGACTGCG  
4561 TGCGTCTGGT TAAGATCTTA ATTCGTAGGG CTCAGATAGT ATTAGTAGCA TCGTTTAACT  
4621 GCATCCAGAA ACAACAGCTA ACACTCAAA CTACTACTAT CTCTTCTCTC TCTCTCTCTC  
4681 TCTCTCTCTC TCTCTCTCTC TCTCTCTCTC TCTCTCTCTC TCTCTCTCTC TTTGGACCCA  
4741 CAGGAGATTA CGGTCGGCTA TAACAGTACC GCACATCTGC TCTTTCTGCT CCGGCTGCTG  
4801 TTCGTGACGC CGAAGCTGTT CGCGCTCGTC ATCTCGTTCG TCGAGGTGAT GCTGCACATG  
4861 TGGGCCACC GGAAGAACAG CACGAACGGC AACCCGGACG TCTACTACCG CAGCCCGATG  
4921 CACGTGGTGA CGCGCCAGTT CTGCGAGGTG TGTCGCCACG AGCGGCTGAT GGGCCGGGTC  
4981 GGGAAAGCTGC AGGACGTGCG GATGAAGCAG ATGCAGAACT ACTTCCGGAA GGTTACGCGG  
5041 AACATTGCTT AGCGAAAAAG AAGAAGAAAA AACAACGAAA ACAACCCCGG AGGCGCTTGC  
5101 TGTCTACTGC CCTTCTACC GCTACGTACT ACAACTACTG GTGTGCCCTG ACACTCTGTG  
5161 TTTTGAAGC TTACGCTCGC TCCGTCAGCC GTGGAGGTCT GGGGATGATG ACCGATAATG  
5221 CTGCTGCGCG CTGCCAATGT GTGCGTGCCT TTTTGTGGCT AGCCCCTCC CAGATTATAT  
5281 TGTTTTGTTA TTTTTTCTT TCTTCTTCT GTGCTACTTT CACAAAACAC TGCCTGTAA

5341 AGTGATAGCG ATTTACGGAT TTACACATAT TAATAAAGCA ATCGAAACGC GTATTTTGGC  
5401 ATTTTGGGGA GTCTTCTTTC TTCACCAATT ACAATTTATG GTGGACATCC CAGAGTTACC  
5461 CGAAATCAGT GGAACAAATT AACTCAAGA GTTCGAGTTC TCAGTCGAAC TGAGAACTTG  
5521 TACAGTCTGT TCCTGAGTTA CGCAATTATA GA

//

LOCUS 22 2689 bp DNA linear PLN 25-FEB-2004  
ACCESSION 22  
VERSION GeneMark.hmm v3.0 self\_training  
ORGANISM A.gambiae  
FEATURES  
CDS join(500..847,1588..1816,2158..2189)  
/translation="MGLPDLPGQPEDDSAFTMDENNTVHLEPLSEDES DNESMDANG  
YAGYQPLNMDL NHPNRRPSLMEDEAESGVGEGETVGLDVANSINADFLNVDVWNAP  
RPNELNIELDSSKAAEIVNVMAGIKLPPTTAVPEWARGVP EEEWKENLLQRIRQRQQT  
DVDDGCGTSFTV GSSCPTIPNSSSSSTSSSAGAGGGGGGTSYSVA"

ORIGIN

1 ACTGGGCTAT GTCGTCGCTC AGCATCTGCA GCTTGTGTGTT GAAGTGATAG TTTTCGAAGC  
61 GAAAATAGTT AACACCGAGC TTAACGTTT GCGCGCCGTT ATCGCCCACG ATGAACCCGA  
121 ACTCGATACC CTGGTCCAGT GCGCTAAAGA TTGCTCCGGA CCGGGAACAA TCGTCTTAG  
181 ACTTCCATTT TGCTGTGCCA AGCTCGTCCA GTCGGGTGCA AATATCCTGC AGGGAAACTG  
241 CAATGCGATT GGGTGGATCA TTTGCTGGGT TGTCTAACAA ATTAACCGTT GGCACACTTA  
301 CCGGGTCTGC CCACTTCTCTG TAGTATGTAC ATTATTTCCG GTAGCATTAT GTTCGGACAC  
361 AGCAATTGTG CTTTGCTTCC TGCTTTCTGA TCCGCCAACA GACAAATGAA CCTTGATGAA  
421 GGCAGCCTCA AAGCCAACTA GATGGTGCAA CTTACAGGAA AACGTTTTCA CTGCTTACTG  
481 TTGTTTTTCG T TGCAGAAAA TGGGACTTCC CGATTTACCG GGCCAGCCGG AAGACGATAG  
541 CGCCTTTACG ATGGACGAAA ACAATACCGT ACACCTGGAA CCCTTGAGCG AAGATGAAAG  
601 TGACAACGAA TCCATGGATG CGAACGGCTA TGCCGGCTAT CAACCATTGA ACATGGACGA  
661 ACTGAATCAC CCAAATCGGA GGCCGTCCCT AATGGAGGAT GAAGCGGAAT CCGGTGTCCG  
721 GGAGGGAGAA ACGGTCCGGT TGGATGTAGC AAACAGCATC AATGCAGATT TTCTCAACGT  
781 AGACGTCTGG AATGCACCAC GACCCAATGA GTTAAACATC GAGCTGGATT CTTCCAAAGC  
841 CGCTGAGGTG AGACACAGAA TTAATATGCG TTTGAATGAA TTCGAGAGGG ATTAATTTTCG  
901 TAAGAAAAAA ATGAATTTTG GACTATCAAA ATCAATCAAT AGTTATGCAT ATGGTGGATG  
961 ATTACATGAG CGACATTACA GACACGTCCT CCAAAGGTCT GTTACGTGCT CCCCAGAAAG  
1021 GAACGAAAGT GATTTGAAGC AAACCTAAAT GTATTACACA ACCCCGCGTT TCGGTTGACA  
1081 CCGGTTTTAAT TGTAATTAGA ATGGCCCCGG CCATTGAATA GGAACCTACC ACAGAACGTG  
1141 GGTTATTGAT CACATACATG TGTC AAGAAA GGACGTGCCT CGTGAAGGTT GCAGGTCACT  
1201 TACATTGTTG TTTTCGTTCTT TTGCTTTCAA ATGTGTATTT CAAGTCCAAC CCTCCCAGAG  
1261 GAAGCGAGCG TGTATTATTC ATTTTCATTT CCATCAACCC ATGGGACACT TGGTCGTCGT  
1321 CCCGTACGGA CCGGACCTGT GTTTTAGTTT CCTTTTCTTT TCTTTTTTCG GGACAAGAAT  
1381 TTATTGCATC CCACCCAAAA CAAAACATTA CCCTTCCGGT TCCGGCACAC AAGGCCAAAG  
1441 TGCTCCCGCA GGAATGGTCA TCAAATAGCT CGAAGTCGAC ACCGCCACCG TCTTTCATTA  
1501 CACTGTTTTT TGTATAGCGA TGAGCGTGTG TTTTAAATAC ATACCTGATT TGTACTTCTC  
1561 CACACACACA CCCCCGTCTC TTTGCAGATA GTGAACGTGA TGGCCGGCAT AAAACTGCCC  
1621 ACCACAGCCG TGCCGGAGTG GGCCCGCGGA GTGCCGGAAG AAGAATGGAA GGAAAATTTA  
1681 CTACAGCGAA TTCGCCAACG ACAGCAAACG GATGTTGACG ATGGATGTGG CACCTCCTTC  
1741 ACGGTGGGAA GCAGTTGCC GACGATACCC AATAGCAGTA GTAGTAGTAC TAGCAGTAGT  
1801 GCTGGTGCTG GTGGTGGTAG TTCAAGTACT AGGACGTGAT TTATACGCCA TACATACGAT  
1861 TCATGCCAAT AATAGCGTCA GCTTTCATTC CCACATTCCC CCCACTCCCC CAATTCCATG  
1921 CCACGGATCT CACACAGCAA CGGCATTGAT GCTTGATGGT AATATTTAAA AAAATGGTGA  
1981 ATTGAATTGG CTCAACCACT TTCTTCTAGT TCCACGTTGC ATCCTTGGA TCTTCTTTG  
2041 AATACAATAA AGCGCACAGC GGACTCACAT TGGCCCGGCA AGCCGGCAAA GGAGTTGTTG  
2101 TTCTATTTAA CGATTTATTT TATGCGAAAC ATGAATGCCA CAACTTCCAA TTCCAAGGGG  
2161 GTGGCGGGAC GTCGTACAGT GTAGCATAAT GGCACGCGGT TCACTGCGCG CTGGAACTCG  
2221 GCATATGCAC CCGTGCGATC CGGTT CAGGC CTTTGCCACA TTTGTACCGT TTAGCCGGCA  
2281 GGCATGCCGT GCATTTGCAT TTCCGTTGCA CTTCCGCTT GCGCGTGTCC GCTACTGGGA

2341 AGGGGGATAG AAACAAATTC CATTACACAG AATCCCAAAG GAAAAAGGTG AATGTCGTCTG  
2401 TACAGTGTGG GCACGTTTCA TAAAGTCTGA CCCGACCCGA GTGACCGGTA ACGGTAATGC  
2461 CAAATTTTCC CTAATGCTAA CCCTTTATCC GGCATGCATG CAGGGGAAAA TGAACTTTTA  
2521 AAATAACACA AAAATGTTCA CACGTAATTT AACATATCCG CGCGCGTGCC CGCCGTTGGA  
2581 ATTCGCCCGC CGCCGTATGC CGGCTCTATA TGTGCAAGTC ACTCGATAAG GGGGGGGGGG  
2641 GAGAGAGGAC TGGGATTAAG TGCGACCGCG CTGATTGCTA TGCTCGATA

//

LOCUS 23 1614 bp DNA linear PLN 25-FEB-2004  
ACCESSION 23  
VERSION GeneMark.hmm v3.0 self\_training  
ORGANISM A.gambiae  
FEATURES CHR ---  
CDS 500..1114  
/translation="MEPGALDYEYAPATEADRAEVRQALATYFYPEEPLTLAHRDGP  
FVTEDDMENALSFLAQGTTILARTAANGELVGVSIGGPSAHEITRKLADIVAFLEM  
LDVRAYGFARSSSAYHVYALAVHPAHRAHSIGRRLMEEQIALVRARWPAFAAVTVET  
TGPGSGRMLMGRIGMRETGRLSFADYRDAAGDQVFLGAGEVVAWEMKL"

ORIGIN

1 GAGTTCACGA TGACGATGAC TTCAAGGAGC ACACCTGAGC TATGAACAAC CTGCTCTGCT  
61 CTACGGCAAA ACACCAAATA AGTTTTGGAA GCACCCCAAT GGTTACTACG TCAGCTTTGT  
121 AACGGAGCCG AGCCTCGAAA TGCTGAGGTA GGTGACTTGA AATAGAAATT TCCCACAAC  
181 GAGACTGTCC AAGTAATGGA TTAGTTACAT TTCATCAACG AAAGTGCATA AGCATAACCG  
241 ATTGCCCTCA GATGCTGGCC AGCTTTAGCA AACATCGACA TCTGTTATCG AAAGTGCATA  
301 ACATCGCGAG ATACATATCT CCTCCACAAC GCATCTCGCG AGAATGGAAT TGTGATGCTA  
361 ATAATTGCGC CCAGATCCCA CGGTACAACA TTCCCGTGTG AATTTCTCAA AACCGATCGT  
421 AAACGATCAA GCAAAACGTA AGCAATCGT TACCACATAA TCGAGCCCAG TTGCCAGTTC  
481 AGTCCGTCTA CACATCAGCA TGGAACCAAG TGCTTTGGAT TACGAGTACG CTCGAGCAAC  
541 GGAAGCGGAC AGGGCAGAGG TTCGCCAAGC TTTAGCAACC TACTTCTACC CCGAGGAACC  
601 ACTGACACTC GCCCATCGGG ATGGTCCGTT CGTTACCGAG GACGACATGG AGAACGCACT  
661 GTCCTTCTTG GCGCAAGGCA CCACCATTCT AGCCCGTACC GCGGCCAACG GTGAACTGGT  
721 TGGTGTTTCC ATCGGTGGTC CTTACGCGCA CGAAATTACC ACCCGAAAGT TGGCCGATAT  
781 TGTAGCGTTT CTGGAGATGC TCGATGTTCT GGCCTACGGG TTTGCGCGTT CGAGTTCAGC  
841 GTACCACGTG TACGCACTAG CCGTCCATCC TGCTCACCGG GCCCACTCGA TCGGACGGCG  
901 TTTGATGGAG GAACAGATCG CGTTGGTTCTG TGCCCGGTGG CCAGCGTTTG CTGCCGTGAC  
961 GGTAGAAACA ACTGGTCCCG GTTCGGGTCG GCTTATGGGC CGTATCGGGA TCGGTGAAAC  
1021 CGGACGGCTT AGCTTCGCGG ACTACCGCGA TGCGGCGGGT GATCAAGTGT TCCTTGAGC  
1081 AGGGGAAGTG GTTGCCCTGGG AGATGAAACT TTGAAAATGA AAAACAAAAC CGTTACAAGC  
1141 ACGTGGTTTA GGATGTGTTT TGGAATAAAG GTTAGTGTGA TGAACATTTT AAAAAATCAA  
1201 TTGTTATATT AATTACTTTA ATTAGACAGT GAAGAAAATC GCGCAAGTTT TTGTTTTAAT  
1261 ACTCTTTATT ATTTCCACTT CTGTTTCACTA TTCACATTCT ACACCGTTCT CTTTTGCGCC  
1321 GTTGCGCCCT ATTTGCTGCT TACCCTTCGT CCCTTCGGCG CCTCTGTGTG TACTACTCAA  
1381 ACATGTATTA GTGTTTCGTA AATCTAAACA TATGACCAAC AGACCACGCA CCTCCAGCCT  
1441 AATCCCGTTG TTTTTGCTGT GTATTATCCC AAGAGAAAAG TATGTTAATG TTGAATGTTT  
1501 CTTTCCTCCC CCGTTTGCTT GGGTAGAGTG ACATCGAGGT GTGTTTATGC TGTAGATATC  
1561 TCGCGATTTT ACACATTCTT CTCCACGCAA CACGACGTTG CCTTCAAAGA TTAG

//

LOCUS 24 1779 bp DNA linear PLN 25-FEB-2004  
ACCESSION 24  
VERSION GeneMark.hmm v3.0 self\_training  
ORGANISM A.gambiae  
FEATURES CHR ---  
CDS complement(join(500..784,851..1044,1123..1279))  
/translation="MSDSDDSSDETNAQLLSAVDTSFLNDNLYNPTAKNEEDNKPNK

EVKSSPVPAESVPKSNRFLPEEESIFHSELNVPAAVQKFTA EKLSRFISTVIEFDET  
ERTPQSLVANGTTDEVGVKLLKVP IVRRAVEKEAKLPLADKIAASVCDPPTFPSEVQ  
QWKGPRKRSIEFKYKQKQNGTIVEKSDPFANEFTKARNANMWHESKIKKFKKRA"

ORIGIN

1 TTCCACCCTT GCTGGATGAG TGCATACTGT ACCTGCTGCA GCTCGGACGA ATAGTACAAT  
61 CGCAAACCGC GCTCGGCCGT TCAACATCGC TGCCCTCGCT GTTCGTTGGA CAGGAATGCA  
121 AGCGGCGATC GCAGAGCGGA CAACTGCAGC ACGCCGAAAG CTTGGTCGAT GAGGTGCGGG  
181 AAACGTTTCGT CAAGCTGCTC GATGCGGCCG TACTGAGCCC GAAGATCTAT TCACATTCCG  
241 AGACGTCCGG GAGTTAGAAG ATGTAGGTGA TCGCCATGAT AACTTTTCGC AAGTTGTAGA  
301 TTGCTGTAAG ATAAAAAGTG CTGCAACGAT ACGCTCCGGG CGATTGATGC TAGTGTCCGG  
361 ATTGATTCTA CGCCGGCAGC AGTGGCTACC ACTAGAGACC AGAGCAACTA ACTCAGCGAA  
421 CTACTTGTAA CGATAGTGTA CCAGAACAAA GTATAAACTA ACTTGGCCTT GATTTTTATC  
481 ACGATTTAAT GGTTTCGTGT TAAGCACGCT TTTTAAACTT TTTAATTTTA CTTTCGTGCC  
541 ACATGTTGGC ATTGCGGGCT TTAGTAAACT CATTTCGCAA CGGGTCCGAC TTCTCCACGA  
601 TGGTGCCATT CTGCTTCTGC TTGTACTTAA ACTCGATCGA TCGCTTCCGT GGACCCCTCC  
661 ACTGCTGCAC TTCGCTCGGA AATGTGCCCG GATCGCAAAC AGAGGCAGCG ATTTTATCGG  
721 CCAAGGGAAG TTTTCGTTCC TTCTCGACCG CTCTACGTAC TATTGGCACT TTTTTCAGCT  
781 TCACCTCAGC CGGGCAAGTG GGATCCAAAT TGATGTCAAT AATTTTCATCA CACCCTGGTA  
841 AAAGACGTAC TCCGACCTCG TCGGTTGTTT CGTTAGCCAC TAATGACTGC GGAGTGC GTT  
901 CGGTTTCATC AACTCTATG ACGGTGCTAA TAAATCTGGA CAACTTTTCA GCCGTAAATT  
961 TCTGCACGGC GGCCGGTACG TTTAGCTCGC TGTGGAAGAT GGATTCTCC TCGGGCAGAA  
1021 ACCGGTTTGA CTTGGGCACA GATTCTGTAA TGCAAGCAAT GATTAATGTT CTAATGTTTC  
1081 TTTGGTTTGA AAGGGGCTCT ACGTAAGCTT CTTATTACTC ACCAGCCGGG ACAGGCGAAG  
1141 ATTTAACCTC TTTATTTCGGT TTATTATCCT CTTTATTCTT GGCTGTTGGA TTGTATAGAT  
1201 TGTCGTTTCAG AAATGAGGTA TCTACCGCCG ACAATAATTG GGCATTTGTT TCATCGTCGC  
1261 TACTATCCGA ATCGGACATG GTTGAGCAGG AGCACTTGCG GACAAGCAAA GCCCGTAAAA  
1321 TGTGGTGAAT GGAAATGCC AAAACAATA CAATCTCCCC GCGGGGTAGG GAACGAATGA  
1381 CATTGTCTGC CGAGATGTAT ACAACAATTT TCAGATTTTC AACAGAAAT CCGAAAAAAA  
1441 ATATTATTGA GCGCATTATA AGGTTTAATT GAAATAAATG TGCAACAAAT TAATTATTT  
1501 AGGTAAAAAA AATGATTTAT GTTCTTTGTA CTTGAGCATT AAAACACAAG ATTTGCAGAT  
1561 ATTCTTGCAG CCTCTATTG GTCCACGTTT CCTCAAGCTA CCTCGGTTGA TGTTTAGTTG  
1621 GCAAAATTTG TTTGACTGAG GGAATGAAAA AAAAGTGTCT GCTCCGATAG CAGTTGTACG  
1681 GGATCGGGCT CATTATTTTG TAACCTATTT CGTGCTAAAG GCAGCTCGTT GGCCGTAGCT  
1741 GAACGCCAAA ATGCTTTCCT CTGGGTCCGG TGCAATCGG

//

LOCUS 25 7936 bp DNA linear PLN 25-FEB-2004  
ACCESSION 25  
VERSION GeneMark.hmm v3.0 self\_training  
ORGANISM A.gambiae  
FEATURES  
CDS join(500..517,4126..4385,5345..5472,7174..7436)  
/translation="MEETSKPFRATGRLVGLGLELALLLLVCGVTHAHTPELPA  
ASAQVSPGDATGLAADAGQHLPPAIDAKTDDSDAGKSVVNWKLACKQLCSAGLGGPS  
CGSTWLRTTTTSDSPTLPVDKDTLDGVCPSLCANGLVSKCNCTSFPRKQDFDQNLIC  
QAFCTVASVQLAGCSRCDGTGPSLGNFGALEIVETTTPNWDELCSMFCKMGDGGTLC  
NCDLPPFF"

ORIGIN

1 CGCTTGACACA AGCATCGAAA TCCATCCGAA ATTCCACCCG CCAACGTGTC AACAGGATCG  
61 ATTGCCCCGT GGTGCCCGTG GTGTACACA CCTTTCTGAC AATGTTACAC AATGCGCTTT  
121 GCGTGGTTGC AACGTGGTAT AAATAATAAA TAGTTTTACC TTGTTTTGTT CTTCTTTATT  
181 TAATGTTGTT CCCCAGGG TACGAAATTT ATGCAAAATG GTACCTTGCC CCCCCTGGT  
241 TGGTGCCATA AACTATGGGA AAGTGTCTTT TTTTGTGTTAC AAGTGAGCCT AGTGGGACAG  
301 CTGGTTTGTG CGCAAATGTA CCATTTCTGA GGTTAGCTGT TTTGGAGAAC CACAACCCAA  
361 ATGGCCGGAA ATCCTTTGCG GGTGTCGTGT CCAATTAGGT GTAGCTGATC CTAGCCAAGT  
421 GTCGTCCGAT GACGTCAGAC AAATGGGAAA AGTGTCTCTC GTTCCATTGG ATAACTTTTT

481 GCACATGTCG GTAAATGAAA TGGAAGAAAC GTCGAAAGTA CTTCTGATT C AGACAAGCAA  
541 CTGTTACTCT ATTTCTTTG GTTATGAAAT CGTTTAAAA CAGTTTAAGC TTTTTTACTT  
601 TCACCATCAA CCTTTAGGTA AAGTTTTCCA GATAATAAAT ATACAACCGT TCCCACACGG  
661 ATCTTTAAAA AGTATCCAAT AAAAAACAAA GCTCCAATGG GCAAAAACAA TACACTCGAA  
721 AATGCCATTT GCTGGTGCGG ACGATAACGG AGACCAAACG CAATGACCGC ATGTAAACGG  
781 ATTACCCATT TTACGATCCA CCGTCCCAGC GTCCTACGTC AAAGTACAGC CGTGTGTGAG  
841 TGTTCATTAG TGCCACGAGC ACCATATCCT TAATCCCGGC GACAAATTA CCCATTTTCC  
901 AGGCCCAGGC TTGTCACGCT TTAGTAGTAG TAGTAAGCGA CATGGAAAAC GTGTCCCATT  
961 AAATCTATCT CACAGGCAGC AGCTTACCAG AGTGTGCCAG ATGTTGGCGT GTTGGCGTCA  
1021 GTTGCCTTCC TTCGTCTACT CCTACACAAT TCCACTTGCC AATCTGACTA TACAACATGG  
1081 TGTTGAGGTA GACAAGTGTG GGCATACCT GAGTGGATCC GCTTACAGTG GCAAAGGACA  
1141 AACGCAAAGG TTGTAATAATC GATAAAAAAT CATCCATCCA CTTACTGTAA AACTATAAAC  
1201 TATGAAGTGC ATCGATATGG ATATCAGTGA CGCAAGTGGA ATAATGTGCA ACTATTTTCAT  
1261 AACGCTAGTA GAACACTCTC GCAGAAGAGA ATGTGAAAGG CAAATAGTGA TGAAAAATC  
1321 GATAAGTAAA GGTAAGTATG AGGATTGTAC AAATGGTTCC CGGAGCGAAG CAATTTAGGC  
1381 TATAAAATGA GCAAAATGTA GTAGGCAGGT GTGCCATTAG CATGAATCAA TATCTTAATG  
1441 ATATGATCGG GAACATAAAA TGGAAAATTG AAAAAAGTTA AACGAGTTCT AATTTTCATGT  
1501 AGAGCTATCA TGTAAGTAGG TTATGATGAA CAAGATGTAA TAAATATAAG ATGTTTTTCAT  
1561 TTAGATACAA CAATGATTTG TATAATAAAT GGCCTGTAAA TGGCGTAATA ACATATGCGC  
1621 GATGCGATAA GTTATATCTA AATAGATGAA TATGAAGTAA AAATAGTACT AGAGTATCAA  
1681 ATACTGGAAA TCTTTAGAAT CCAGTCAGAA TATTATACAA TTGTCTTTTC GAGATTGATA  
1741 CAATGTTCTG TTTAAATTA TGTGAAGAAC ACCAAACAGC CTGCACACTC TAATGAAATA  
1801 AACTTTACCA AATTCAACCT TTTCTGGTAA CACCCTAGAA ATATCAAACCT ATAAACCTTA  
1861 CTCCTCCTTT ACATCTCCAG ACTAAATCGT CGTTGTAAAT CGTCCTTTCC AGACTATTAA  
1921 ATCGGAATTA GGAGACCCTT TAGCGTGCCT TGAAGTGTCC AACCATAAGA CTAAACTGCT  
1981 ACTTACTATT CTTCTCCAAT AATCTTTTGG CTCTATAACT GTAAATGTTC AATTCAACCT  
2041 AAAAAATTGTG GTATAATTTG TAAGAAGTAT CTTAGATCCT CTGGCGTCTA GACTTATGAA  
2101 TGTTGCAATA ATCTGCTGAA CAATCGATTA TTTGTAAAT GATTTAATTG TTAACAACAA  
2161 ATCCGAAACA TATCTAAAT TCATATAACC CATATCCGTT GAGAACAAA ATGAAGCTT  
2221 TTCCCTTTAA CAATCCGTTT CCATTAGCTT TTCTATACAT AATTGTACAG AACTACAGTC  
2281 TACAGACATT TTCAAGGTTT AAGTTTCTAG CCCGGAACCA AGCCAGTTAC ATCATATTCT  
2341 TTCTACAAAC ACAGAGTCTT CAATTAAGT ACTTCAGAAT GAAGTCAAT TATACCCGCA  
2401 GGCAAACAGC GACGCGGTTT AGATTTATTG TGCCGCGACA AATATTGTGC TAGGTAAGTA  
2461 AACTAAAAGC TTACCGCCAG CCCCACAGCT CGATAAGAAA GCTCCACAC CGATGTTGTT  
2521 CTGTACATTG TTTTTCCCTA TTCCCTATGC CATATGCTCC GGCCTTGAC AGCAGCAGGG  
2581 CCCCCTCAGC GGACCCAGCG CCCGCGACCT TAGCAAGGAA GATAATCAAC AAACACCTAC  
2641 GACACGGTTT TCTGTATCGC AAACGCTTTA CACCGCCTTC GTCTCCCGCT CGCAGGGGCT  
2701 GATAATTGAT CCCGGAACGC GATAGATCGA TACCGGAACG CGGGATTTGG CGGGACGCAC  
2761 GGTGGCCAAT TATCGACGGT ATCGCTGTAA CACGCTGATA AAGCAATTTG AAGGAGCCAT  
2821 CGTAATCCGC AGAGGAGGTG TTCGATAGCG AATCGGGCTA CAAAAATCGG CTCGCTCGCA  
2881 AACGGTTCGT GCAGTGATAA TTGACGTGAC TGTTCCGGTTG CACGCAGCGA ACGGATTGAT  
2941 GCAAACCAAG CCCAATTTTA CACCATTGGA GTATACACAC AAACATATAT ATATAAAGA  
3001 AGACGAAACT GTAGCAAAT GCAAAGTGA GCCAATTCTG AACCAGCATT AGTGCTTTGT  
3061 GATACATTTT GCATTTAAAT AACATGAAAG TGAGTTGAAT ACCGTTTCTC ATTGCTTTGT  
3121 CTTCTACGAC GCAGTAGTAG TGTCTTAAGT GTATTCAATG TTTTTTATC TCTTAAACGT  
3181 CTGGTGCGGA AATGAAAAA AAAAAAGCTA AATTGCTCCT TTCTGCAATA CAAACACCGA  
3241 CCGAGATGAA AGCGCGACCA TAAAAGTGGT CAGCTCCATC CATGCCAGC CCGTGCAGCA  
3301 TTGACTGGAC ACAAAGTGGT CGCAGTACTT CAAAAGTGA CTTGTTGTTG AGTGAAACGG  
3361 CTTCAAAAAG ACTTTCTCAA GGAGGGATT TATAAATCA CTGCTTGACA AATCGTTGTT  
3421 AAATCGGATA AAGCTAACCT TAGCTCAAAC AGTAAAAACA TGTAGTATGT TTGTAAGA  
3481 GACTCGCTCT ATGAGATAAT ACAGAGCTAT CGGAATATTC TAGAACCTT CGACGAAAAA  
3541 CGGGCGCAGA TTGGAGCTTT TCCACTGGTG ACCGAACGGA ACAGTATATT TTCCATTTAT  
3601 TGGAGCATGT GATTTGCGGT AATGGAAAA CAAAGGCCCT TTCCCCCGG TCCTCAACAA  
3661 TAGTCATCTC ATTTAGTTCC GAATTCGATG GACCAAGAAG CACGAGAAAA GTTCTTCGCT  
3721 CCAAACAAAC ACAAAAAAGT GATGATTTCC AACAGTTTGA TGATTTTGTG TGTGGTGGC  
3781 AAATGAGAAT TGTTGCTTT CCCGTTCCGT TGTGTGTGTC GTTTTTGGGA AGTGAGAAGA  
3841 AAAAAATATCG ATCCTTGTTT TTATGGTGAA TTCATACAAA CTGTGCAAAA ACGTTGGACC

3901 AAAAATTTAG TTGGAAGAAA GTTGATCTTT CTCCTTTGCC GTTCACGGCG GACAACAAC  
3961 CCATTGCACG TTGAACCTTT ACCAAGTATA TAAGAAACGC ACCGACCATC AGCGACCACT  
4021 GCCGTGGTTG TCCTAGATAA TTGAGTTAAA TTATCCACGC CCAATCGTTG TTATGCGTTG  
4081 TGTGATTTTT CCCCCTTTTT TACGCCTCCC TTCCCTCGTT CTCAGCCTTT CCGTGCAACC  
4141 GGTCGCCTTG TGCTGGGATT GGAGCTGGCA CTACTCCTGC TGCTGGTGTG CGGTGTAAACG  
4201 CATGCCACACA CCGAACCGGA GCTCCCGGCG GCCGCGGCGA GTGCGCAGGT TTCACCCGGC  
4261 GATGCCACGG GACTCGCAGC GGATGCAGGG CAGCATCTTC CTCCGGCGAT AGACGCTAAA  
4321 ACGGACGACA GCGCTGGAAA AAGCGTAGTT GTGAACTGGA AGCTGGCCTG CAAACAGCTC  
4381 TGCAGGTGAG TGCAGCTCGT GTGGTTGGTA GTGTGCTGCC GTCCATCGTT TTCTCGAGCA  
4441 CCATGGGAGT GAAATAGTGA GCGGACATGG TGTCTCGAGT GCAGGCAAAC AGTCTGTGGC  
4501 ACGATTGCCG AAAC TAGATA ACGCAAAGTT CTGGGTGTTG ATGGGAAAAG TTGTATGCCG  
4561 GAGGGATGTG TGTGTGTGTG ATGTGTTTAT GTGTGTGAGT GTGTGGAAAA ATGAAAAATT  
4621 TTACATCTCA ACGCTCTCTC TCATCCGTTT TATGTGGCTC CTCAGGCAGC AACTGTGTCA  
4681 AGTGTGAAGG AAAAGCTGCA GATGATTGAT GGCTTCCAAT TTTACGGGCG AGGCTTTTTGT  
4741 GAAGTTTTAC AGAATGCGTG TCAAATAGCC AAAC TGATGT GATGGAAGAT TGA CTAGAT  
4801 CTATCATTTT GTCCCTTTTT TTTGCTTGGG CACAGATTTG CCGACGGGAT TAGACGTACT  
4861 GATGTGTAGA GTTATGCTTG CACGAGTGAG CTTTGTGAGA CGCTCCTCCA ATAATGTTTT  
4921 CAATTTTCTA CAGACATTTT TCCAATACTT GATATCCAAG AGCAGTTGAC ATATTTTACA  
4981 CTTCTAGACG CGTTTTTCTC TTCACCGTGT GTCACCTATT TTTTCGCTGC CCATGTTATC  
5041 AGCGGTCTAT TGCTTTTAAAC AGGCGCAATT AGGCGCAATT GCCATCAACC GGTAGCCACC  
5101 AAAACCATAA AGCACACACT ACTGCCACAC GATCGCAAAC ACATTCCGCC GATGGCGATA  
5161 AACCTAGGC ATCTGGACGG GAGTAGCAGA CGAACAGATA ATCTTGTGGT GTCCCAATGA  
5221 CGGGACACTT TTGGATACAG GGACCTCCCT AATAGTTCGC CGTAGAGATA CTTATTTTGA  
5281 GCGGATTTTA TATTTAATAT TTTCAAATAG TTATATATCT CTCTCTCTTC CCCTCTTTTC  
5341 ACAGTGCAGG GCTTGGCGGT CCCAGCTGCG GGTCAACATG GCTCCGCACT ACCACTTCCG  
5401 ACTCCCCAC ACTCCCGGTG GATAAGGACA CGCTGGATGG GGTGTGTCCA TCGCTGTGTG  
5461 CCAACGGGAG AGGTAAGCTT GGTTGCTTTT CTTTAAACATC CAAATGACTA TGCCTCAATA  
5521 GGGTATGAGA CCACGGGTCG AAAGGTCAT TCAACGACGT CAGTTAAGCG CCGTAAATCA  
5581 ATCATCGTCC GTATGCATCG ATCCGGCAGG TTCCGCTGAA CTTTAGAATG TAGATCGCCG  
5641 ATAGACAAGC GCAGCTGTGT GCCGATTGTA ATATCTAAAT CCCTTAATTT TTTGATAATT  
5701 AATCAACGCC CCTCCGACTC CGGTGTGAGT TAATTAGGTT GTTTCCCAAT ACGGGGATAA  
5761 AGCATGATAC TGCGGGGGTT TTACACTAAG CCGATATTGT TGGGGCTGAC ATCGCTTCGG  
5821 TCAAGCAGTA CGTCATAGAT AGGACGCATC TGGGGGGCTC GTCTCTGTGC GGTCAATTTGG  
5881 AATTTAGTTA TCGCCAGTGA TACCAGTGTG CTGGTTAACA GTATTTAGAA GATTAGAAAC  
5941 CGTTCATGGA TGAACACGTT TGAACGAGTT CCAAATAATG AATCACCTG TTGTGTTGGG  
6001 ATGTTACAGG TATAATAGCT TGGGGAGTTT GGTGTCTTCT AATGCGACTG ACAGCTTCAT  
6061 CTATGTACTA GCGTGAATCA GCATGCCACG TTTCAATTTG GTTTTCTTG CTGAACATTT  
6121 ACTGACGAGT CAAGAGGCTT TTAATGGGAA CGGTCTTAAA TGGAGCTTTG GTTGGACTTA  
6181 CATTAAATGAG AATAGCACAT CTTTAAAATC AGTATTAATA TTATGTTTTA AACAACATTT  
6241 GGTATAAGGT TATTGGTTGA AATATAGCGA AATAGTCATT TGCCGACGGC ACTTGATAGT  
6301 GCTGTGTTAC AAAGACTTTT GCTAAGGCTT ATCAATTGGT GAATGCTTAA CAACATGCCC  
6361 GTCATGGGTT CAAGCCCCGT ATGGACCGTG TCCCTCAAAC TTTGGACTGC CTATCATATG  
6421 GTACTATGGT ACAAGCAGGC CTTGACCGAC GACGGTAAAA TGACCTCTTT TTCAGATAAC  
6481 ACCTTCTTAC CTCCGTTTGG TTCGTCAACA TCTTGGCCCG CATTAGACAT GTTCGAAAAAT  
6541 GGCACATGGT TTTGGGCTTG CGTCTACTAA TTCGCTTATT TCGGTGTTTG TGATAGACTC  
6601 TGCGTACAAA AATTATGAAA TTTCAAGGTT GACCCATTAC TCTTCTCTCT TCCAATTGAC  
6661 AGGCTGTCCC TACAAAAGACA AAGGCTGTTT ATATCCATAT TCTAAGTCTT GCCTATGGGA  
6721 AGGTTATGTT TAACGACTGT TCCACTGGAC GGACCCATAT ACTTCGGCCA AAAACTCTTC  
6781 TGAGAACCTC TTCTCTCGAG CGTGATCATC AGAGTTTTGC CTTACCGGAT CAACTATGAA  
6841 TCACCGCTGT CGTCCTTGCT TCGGAGCTTT GCAAACACTA AGGCTACCAA ATTATGCTCC  
6901 GTGGTTTTTCG AAGTATTCAT TAATGGTAAT TCTGATGGCC GATACTAGAG AATTACCCTA  
6961 AAGCTTGTGA ACAAAGACA TCACTGAACT GACTGACGTA TCTTGTGTAG AACCGTTATG  
7021 TAACACTGAC ATTTTCATCAC TGGCTACTAA GATGAGGTTT TCACGTTGCA AGAATACCTT  
7081 CTCTTGGTTT CCATAGCAAT CGCGAAGCGT GAAATAAAAA ATCTGACCAA ATTTCTTTTC  
7141 CGTTCTCTCT CATTCTCTCT TCTCTCTCT TAGGTGTTTC CAAATGTAAC TGCACCAGTT  
7201 TCCGGCCGAA GGACCAGTTC GACCAGAACC TTATCTGCCA GCGGTTCTGT ACCGTCGCCA  
7261 GTGTGCAGCT GGCCGGATGC AGCCGTTGCG ACGGAACTGG CCCCAGCCTG GGCAACTTCG

```

7321 GTGCATTGGA AATCGTCGAA ACGACGACAC CGAACTGGGA CGAGCTGTGT TCGATGTTCT
7381 GCAAGATGGG CGACGGCGGA ACGTGTGCA ACTGTGATTT GCCGCCGTTT TTCTAATGTG
7441 CACACAACCG TGGACACACC ACACACACAC ACAAACCCAA CCCAATACAG AAGACATTAC
7501 GTTCACGCTT ACTTCAATTA ATTTACCGCG GGGTGCACCT ACCCCAATGC GGTACAAAAA
7561 ACAAAGACGG CGTTGGAATT CATTTCGTGA TTTTTTTCAT TCACAAAAGA CAACAGCACA
7621 ACATGTGAAA TACGTTTTTG GGAGGGATT CGTGAAGAAG ACCGGGTGCA AACGTTATCA
7681 TTACATATCC GCAGGGTTTG CATGACATGT GCGGCATTCC GCACCAATCT CAAGCTCGCA
7741 CCGTTTATGC CAGTTTGTTC GCGTTTCAGA CGTTTCAGTT CGATCCGTTT CTAAGGTCTT
7801 ACCTGAGTTT TGAATGACTA GGATAGTTGG AGGAGAAGCA GACGGTAGGA TAAGGCAGTC
7861 GTCGTTGCAC TTTGAACGAT CAATGACAAA TATCACTCAA AAGGGCTTCC AGGTTGAGGG
7921 TGAAACATAG CGGGAC

```

//

```

LOCUS           26       1668 bp       DNA       linear PLN 25-FEB-2004
ACCESSION      26
VERSION        GeneMark.hmm v3.0 self_training
ORGANISM       A.gambiae
FEATURES
  CDS           500..1168
                /translation="MNGGFSKILYRIAAPNECDRIRQALLAFYFPEELVTRSYLDES
                QPQIGPTEEHIQYALSFVHQMAAVAIEQDHGTIVGVTIARCVKPGTADELLAMVPA
                AGSRRWAETLRLFAHLEHTGDVCGFRSRRSYHVFLAVEPHFRRRAIGQKLMDFQL
                ARGKSLRFRVVSADVTCEVAARICERMDMRCVCAMSLNQYRNQSGEHPFVVTGPNHI
                VSTYARYV"

```

ORIGIN

```

1 TTGCTTGAAC ATTTTTTTGTG AATTGAAAAT GGAATAGATA ACATTATATA TATAGATATA
61 ATATTTCAAT ATTTTTAGAT TATTTAAAGA CATCTACACG TGCAGTAATA TAACGCGAAA
121 TTTCAATACC TTTCCCCACA CAGTGTTTAT GACCGAACCA CCCACTACGA CCATCTGGCG
181 ATAAGAGAAC CTACGCAAAA CACCGTACCG CGTTGTACA ATTCGATGCA ACAACCTTGC
241 GAATGAAAAC ATTGCCCTAG CAGCAAACGG TATGCAAGGG TGAAGAGATT AAGCGCCATG
301 CTATCGAACG AATTCGATTC CGTGCGAAGC TAATGCGACA GTCTCTCAAC CAACCTGCCC
361 CATA CGCCAA GAAAAACGA CCAGATTGCA TCGCCGATTC GCTCCTGGGA AATGATATTT
421 CGTTGACGTG GAAGGCGGTA AGACGGTAAG AGAAAACGTG GCCATCGCCT ATACTGTGGG
481 TGCATTTTCG TGCCGTGAAA TGAACGGAGG GTTCTCCAAA ATTCTGTACC GCATTGCGGC
541 ACCGAACGAG TCGGATCGCA TCCGGCAGGC ACTGCTGGCG TTCTACTTCC CGGAGGAGCT
601 GGTCACGCGA TCGTACCTCG ACGAGAGTCA ACCCCAGATC GGCCCCACGG AAGAGCACAT
661 CCAGTATGCA CTGTCCTTCG TGCACCAGGG CATGGCAGCG GTAGCGATCG AGCAAGATCA
721 CGGCACGATC GTTGGCGTTA CGATCGCACG GTGTGTGAAA CCGGGCACGG CTGACGAGCT
781 GCTGGCAATG GTACCGGCGG CCGGATCGCG ACGCTGGGCC GAAACGTTGC GACTGTTTGC
841 CCATCTCGAG CACACTGGGG ACGTTTGTGG ACGGTTCCGT TCGCGCCGCT CGTACCACGT
901 GTTCGTGCTG GCGGTGGAGC CTCACTTTAG GCGCCGCGCG ATTGACAGA AGCTGATGGA
961 CTTTCAGTTG GCAAGGGGGA AGTCGCTTCG CTTTCGGGTG GTAAGTGC GG ACGTTACGTG
1021 TGAGGTGGCC GCACGGATAT GCGAGCGGAT GGATATGCGG TGTGTGTGTG CGATGTCGCT
1081 GAACCAAGTAC CGGAACCAAGT CCGGCGAGCA TCCGTTTGTG GTAACGGGGC CGAATCACAT
1141 CGTAAGCACG TACGCGCGGT ACGTTTAAGG TGAATTTCC AAGAAGTAGT GCAAATTAGA
1201 AACTGATAAAA AGTAGTGTA ACGTATAGCA AAATTGGAAA AATAAATAAAA TGTTAATATT
1261 TTTATTAACA AATGTTGCTT AATATTCAAT GCTCAGTTGA AATCAATAAT TGTGTAATTT
1321 GCGTAGAAAA ATGCATAAAA GACAATAAAT TATATATCAC ACTGTAGGAT TCTAATTACA
1381 AATAAATTCAT CCAAAACTTC AATATTTAAT TAATTGTGAA GTAACACAAA AAAATACATA
1441 AATCATTGAC CGTAAAAATT ATACCTGATA ATTAAAATGT TTTTCCCTGC ATTCGGATTC
1501 TCCTTAACGT TGTTTACTAC CATCTATCTG CCATAAATCA TTACGTCTTT TCGACCGGCT
1561 GTGCCGAAGT GGCGTGAAGG ATACTTACTT CTAGTGCCAA AAATTAATG TCCAAGGCTG
1621 ACCGTGCCCC ATGGACAAAC TTTGAGTGAG TGTTGGGCGA TAGTAATT

```

//



LOCUS 27 1683 bp DNA linear PLN 25-FEB-2004  
 ACCESSION 27  
 VERSION GeneMark.hmm v3.0 self\_training  
 ORGANISM A.gambiae  
 FEATURES CHR ---  
 CDS complement(500..1183)  
 /translation="MSSLRVKCVFCGLIIDCQREDTAKLLAHLRNEHSEMGNHKPTA  
 FTTSNRSKAHPAQPAEKAELEEGSDASFAEGISESEELLHRERVTGTSSDTSKSS  
 SSEDAETIPPHRSTRPLHVSLESQRSVLYQTSLSWCWRPGRPVCCPDCGAHRVPIVR  
 SHATGVTWSSTVASCFLFCWPLCCLSWFFSEPVSEYLHCARCDQLLAKHDIKAERVS  
 PNYAMLD RVEDQL"

ORIGIN

```

1  GTCCGCCATT  CTGCTGTTTT  CATCTTTGTT  GCTGTAATTC  GTGTTTTGTG  TAAAGTGATT
61 TCTGTGCCAA  GTTTTGTAGA  ACGAGACACA  AACGACACCA  ATCTAGCTCG  GTACGCCCGC
121 GAGCAGTAGT  GTTCGGCATT  TAAAAAAGG  GTAGTGTTAT  TTTCGTA CTG  CCGCAGAACC
181 ACCGTGCGCT  TGTGAGGTGA  GGCGGTTGTT  TTACGCAAAG  CATCCAATTT  TCGTCTGCCG
241 CCCGGTGGGT  AGTGCTGCTG  GCCGTTTCGT  GAAAAGTGTG  TGTGTTTCGA  CCCATCATCC
301 ACCGTGAGGG  CACGCAAAGA  TGAGCACCGG  TGCACCGAAG  CTCAGCACCT  CGCTGGACGA
361 AAGTCAGCTC  AGCCAAGTGA  AGGAATGCTT  GGCCAGCTTC  GCCGAACAAA  CGTGAGTAAA
421 CCATTTACAA  AGGCACTGTT  TATTACAAGA  AGACGAATGT  TTCCCTGCC  CTCGCGCAGT
481 AGCCCTTCAT  TTCGCTCGAT  TACAATTGAT  CCTCAACGCG  GTCAAGCATT  GCATAGTTGG
541 GTGAGACACG  TTCCGCTTTG  ATGTCGTGCT  TCGCCAACAG  CTGATCGCAC  CGGGCACAGT
601 GCAGATATTC  GCTGACCGGT  TCGGAGAAAA  ACCACGACAA  ACAGCACAGC  GGCCAGCAGA
661 AGAGAAAGCA  GGAAGCGACC  GTCGACGACC  AGGTTACCCC  GGTTGCGTGC  GACCGAACGA
721 TCGGTACCCG  ATGTGCGCCA  CAATCCGGGC  AGCAGACGGG  TCTGCCTCCC  GGGCGCCAGC
781 AGCTGAGCGA  TGTTTGGTAC  AGCACCGAGC  GCTGTGACTC  GAGCGAAACA  TGCAAGGGTC
841 GTGTACTACG  GTGCGGTGGA  ATAGTTTCTG  CATCTTCCGA  GCTGCTACTC  TTGCTGGCAG
901 TATCGTTTGA  CGTTCCTGTT  CCAACTCGCT  CCCGGTGCAG  TAGCTCTTCC  GATTTCGGAAA
961 TGCCTTCAGC  AAACGACGCA  TCGCTGCCTT  CTTCCAGCTC  CGCCTTTTCT  CGCGGTGCG
1021 CTGGATGTGC  TTTTCGACGG  TTGGAAGTGG  TAAATGCCGT  CGGTTTATGA  TTACCCATCT
1081 CCGAATGTTT  GTTCCGACAG  TGTGCCAGCA  GCTTGGCCGT  GTCTTCACGC  TGGCAATCGA
1141 TTATCAATCC  GCAGAAGACA  CACTTTACTC  TCAAAGTCT  CATCTCTTCT  CCTAGCCGAC
1201 GATAGCATTG  ACAGGTGCAG  TGCGCGGCGC  CTGTGTAGCT  GTGTTTTGCT  TTTTAAACTG
1261 AGCAACTCCT  TTTTCGCTCA  GTAGGCCGTG  CTTGGCGATG  GGAATTGTTG  TTGAAAATTG
1321 GAAAAATCAG  TTTCTTTTTT  CATTATTCT  GTACATACAA  TTCAAGCTGG  TTACAAAATG
1381 TGAGTGATT  GACCTTGTGA  ATTC AATTAA  ACAATACAAC  GGCTGTTCAT  CACATGTCCG
1441 CCACATGCGT  AAAATGGTGT  ACAAATAGT  CTAATCAGCG  GCAAAGAAAC  TAGAAGAAGG
1501 AAAAATCTCT  GTTGTGCAAA  GGAAACGCAT  TTCTAAAGGC  GGCGAACTTC  CTGTTTCCTT
1561 CTGCTACCTG  GAACGGGGAC  CCAAACACAA  AGCCTCAATG  ATCCTTTTCC  TTCGCCGCAC
1621 TCGAGGCTTT  TCCGTTCCAT  CTCCGAGAGC  GCAGCAGCCC  TATCGCCCTG  AATCTCGCCC
1681 GGC
  
```

//

LOCUS 28 1807 bp DNA linear PLN 25-FEB-2004  
 ACCESSION 28  
 VERSION GeneMark.hmm v3.0 self\_training  
 ORGANISM A.gambiae  
 FEATURES CHR ---  
 CDS complement(join(500..1101,1220..1307))  
 /translation="MNVVFLVGLVLSAFATDLSANDCEINVEECSPYSSFLSRS  
 GKTVENDLKQYTSQLVDKSFHFLMSSAFNKHSLDRPGFEKLYRKISDKAWADAIEL  
 IKYQSRGSGFHLVQPSKGENYGVLDVQELSSLQFALDYEKQMAKEAHAIHRKISH  
 AHSKAGSNGSDDVYHYDPDAAHYLDENIIEYQSGVVRDLAGYVHNLKHFTSAKHAAN  
 DLGNHVFDEFLAKVE"

ORIGIN

```

1  AATCGACACT  TTGCTGCACC  GTGTGCTATG  GAGAGCAGAA  AAGCCGTCAC  CGTTGCAGCG
  
```

```

61 GCTCACGCAA AAGGGCAAAT GACTGATAAC AACGTGCACA TGCACAGCAC AAGTGCAGCG
121 GGGAAATCCAG CGTACAGGGT TCGGTAGTCC TCCAAAACCG ATCGTCGATT AGCAAACGGC
181 TTTACGTGGT GATAATTTCA ACGTAAACAA GTCACGCTCA GACGTTTGTGTA AGCGAGCGTG
241 TGAAAGTGCA TCCCAAGCTT TCAACCTAAA AAGGAAAGAC GCAATGACTA CAGATTCTGG
301 ATTATTATTT TCTTCCATTT TGTGGATCAC ATGTTGGAAT TTTAATGTTT ATTTCAAACCT
361 CTCTGCAAAAT ACATTGTTTG TTTTTTTTTT ATTTAGCCAA GGGAGTGGCG CTCTAAGCAA
421 CACGATCATG CGATCGCTTA CAACTGTTGC CAACCTTTCT CCCTGCAGCA AACCGCGCTGA
481 CCCGGCGGAC CTACCAGTCT TACTCCACCT TAGCCAGGAA CTCGTGCAAC ACATGGTTGC
541 CCAAATCGTT GGCCGCGTGC TTCGCCGAGG TGAAGTGCTT CAGGTTGTGC ACGTAGCCGG
601 CCAGATCGCG CACCACACCC GACTGGTACT CGATGATGTT CTCGTCCAGG TAGTGGGCCG
661 CGTCCGGATC GTAATGGTAG ACGTCGTCG AGCCGTTTCA GCCGGCCTTC GAGTGGCCGT
721 CGGAAATCTT GCGATGGATG GCGTGCGCCT CCTTCGCCAT CTGCTTCTCG TAGTCCAGCG
781 CGAAGTGCAG CGAGCTCAG TCCTGCACGT CCAGCACCTT GCCGTAGTTT TCGCCCTTGC
841 TCGGCTGCAC CAGATGGCCG AACGAGCCGC GCGGCTCTG GTACTTGATC AGCTCGATCG
901 CATCCGCCCA GGCCTTGTCG CTGATCTTGC GGTACAGCTT CTCGAACCCG GGGCGGTCCA
961 GGCTGTGCTT GTTGAACGCG GACGACATCA TCAGGAAGTG GAACGATTTG TCCACCAGCT
1021 GGCTAGTGTA CTGCTTCAGA TCGTTCTCCA CCGTCTTGCC GGAACGCGAC AGAAAGCTGG
1081 AGTAGGTCGG CGAACACTCC TCTGGTAAAG GGATAAAGGG TAATGCAGGG GAAAGGCGTT
1141 AGGGGGTAAC TGCGCATTGT ATATATGTGT GTGTGTGTTT TTGTTTATCA CTCGCCATGT
1201 TGAGCGAACG GCCACTTACC CACGTTGATT TCGCAGTCAT TTGACTAAG GTCCGTCGCA
1261 AAGGCGGAAG CCACCAGCAC AAAGCCCAAC ACAAACACAA CATTATCTT TGCCATCATT
1321 TTTTTCTTCT TTTTTCCTC GTTCACTCAC ACTGCCTGTC ACTCGGATCG ATCCTCAAGG
1381 GCGATGATGG CCGCGAACAA ACTTGCTTCC AACTACTGGG GCACGGGTAT CAAGAAGGGA
1441 CAGTATTTGT GAACCTTCTC GATTTCGACAA AACTGCTCAC GGTAATGCG ATTGTTCCGGT
1501 TATGCTTTAG CCAGCAAGCG AAAAGGATTT CGCTGCAAAA TTGACACAAT TTCGTACGGG
1561 AAAGCCACAC ACAGCACAGA AAGCGAACGC GATTTGCGTC TTACTIONCTC CAATAGTTGC
1621 CACTGTTATG AATGCTCTGT CCGACAGTCG AGTGACTTTT GTTCCCGTCC GCACGTCAGT
1681 GTAGTGGTGG TGTGTGCACG CCGTAACTCA CCTACACAGT TATATACGGT CGTTCGCGGC
1741 GCACCATGGA GACAACGAAA CGGAATGGTG CCTGCGCTGA TTACGAGCAG ACAGTGAAT
1801 AAAGATC

```

//

```

LOCUS           29           1704 bp           DNA           linear PLN 25-FEB-2004
ACCESSION       29
VERSION         GeneMark.hmm v3.0 self_training
ORGANISM        A.gambiae
FEATURES
  CDS            CHR ---
                500..1204
                /translation="MTIGVILAVACALFTWPVEGMYLQERANCRTEGCATQYGCVP
                RYSQYKTALYCPQRCMIERCRSVENEPQPRVCHKITSVATGQTLAAMDSYDRRGDQR
                YYGATSLQNPNNTGRGEQRYASLVNPNAGERDRWNLIVPGNYYYYIQNSDTREYLRAS
                ENNYLYLVSGRPTDESFLFKPDLVQGSWSSVLLQSVCYRGIYIFGEQYSGRSASYAMM
                THDLDRCYRESVWSISSVNC"

```

ORIGIN

```

1 CGATCTATGC TAACGAAGCG ACCCTGGCTG ATGGTTCCAG CACACGACGA TCAAACCCAT
61 CGATACCGTC GATTTTTGTG TGCAAGGCCA TGTGCATATC ACCGGAACCA TTTCTCCCGC
121 AACGTGCACT AACTCATCCA GTACGTTCTT ATCTATCGCT TTACATCTCG CTCGGTCTCT
181 GTTGTCCCA CGCCGGCGGG TTCGTTGTCT CTTGTTGCGC GTGTGCTAAA AGATAGCCAG
241 TGGCGGTCAT CTATTTGTAA AACGATCATC AACTCGATCA TTCATGGGTA TTTGCTGTGC
301 TACAAGCGCA TTCTTGCTGA TAGAGCGACC CACCTTCCGA TGACAGCATC TGTGTGTGCC
361 GCCCCTCGTG TCGCAATCGA ATGGAATCTC TATAAAAGTG TGCACAGCTG GAGCAGTGGC
421 CAGCAGTACT CAACCGTGTG TCTTCTCAGT AACCGTGCGT GACGTTTCAC TCATACTCAC
481 CATTCAACAC TGCCACATCA TGACGATCGG TGTGATCCTT GCCGTGCGGT GTGCTCTGAC
541 GTTTACCTGG CCAGTGGAGG GGATGTACCT GCAGGAGCGA GCAAACCTGTC GCACGGAGGG
601 CTGTGCCACC CAGTACGGTT GCGTGCCCGG GTACTCGCAG TACAAAACCG CACTCTACTG
661 TCCACAGCGT TGCATGATCG AACGGTGCCG TTCGGTGGAG AACGAACCTC AGCCCCGTGT

```

```

721 CTGTCACAAG ATTACCTCGG TAGCTACCGG CCAAACGTTG GCGGCGATGG ACTCGTACGA
781 TCGTCGTGGC GACCAACGGT ACTACGGTGC TACATCGCTT CAGAATCCTA ACACGGGCCG
841 TGGTGAGCAG CGGTACGCAT CGCTGGTGAA CCCCACGCG GGCGAACGAG ACCGCTGGAA
901 CCTGATCGTC GGTCCGGGCA ATTACTACTA CATCCAGAAC AGTGACACCA GGGAGTATCT
961 GCGTGCGAGT GAAAACAAC ATCTCTACCT TGTGTCCGGC CGTCCCCTG ACGAGAGCTT
1021 CCTGTTCAAG CCCGACCTTG TTCAGGGCAG CTGGTTCGAG GTGTTGCTGC AGTCGGTATG
1081 CTACCGTGGT TACATTTTCG GCGAGCAGTA CAGTGGCAGA TCCGCCAGCT ATGCAATGAT
1141 GACCCACGAT CTGGATCGTT GCTATCGTGA AAGTGTTTGG AGCATTAGCA GCGTAAACTG
1201 TTGAGCGTAG ACCTGCGAGG AGCACATAAA TTAACCTTTC CTGCCGTTTC AGCCGCTCGA
1261 ACGCTACTGC CATATTTGTT TGATCATGTA TCGAAACGAA ATAAATGAAA GATAAATACG
1321 ATATGAATTG CATTACCTTT TTGTTTTTGT TTCTGACCAG GAGTAATTAC AAAAATTAAG
1381 AGCATTGCGC TTCAATTATG GTTGCACTTC ACAAAGGAG AGCAAAGTCA TTAGGCTTCA
1441 TTCGCCGTCG ATTGGGTTGA GTGAAATCAC TTTTCATGTTG ACCCACATAG CCATTGATGT
1501 TGCAAATTGA CATTGAGCCG TGAGCAATGC AATCGATCGA TTAATAATTT CCCGGAACCA
1561 TTTGATTGTA ATAAAGAATA CATAATATGA TGCACCTACC ATAAAAATGA TTTGCCTAGT
1621 TCAGTGTTTT TAGATTTTTG GGCTATAATA ATTAGTTTTG TATAGGATTC TTATTGAAAA
1681 AACGCCTTGT ACTTAACTCT CTTC

```

//

```

LOCUS          30      1794 bp      DNA      linear PLN 25-FEB-2004
ACCESSION     30
VERSION       GeneMark.hmm v3.0 self_training
ORGANISM      A.gambiae
FEATURES
  CDS          complement(500..1294)
              /translation="MSTLRFARVFRQAWATFEHTGAGDAKFASNLNALRRLVDQLTLA
              DIGLEPSLVATETTFQOPTKAPCTYVGVFENDRFAMSVFVLRNYTMPLHDHPQMHGL
              LRVVSGAVQICSYSEIARRDTVEPRAEGGTLRRHVLVVAEPEKIISSAAGDCAVLTP
              TERNFHEITAIGGPAAFFDILSPPYNTASQPQYYFYRKVPVPRHLAEMEPLGFGGPD
              KPSAQEDERPRYVLETIPNPEHYCYCDTVHYATPEFMYQQAEGGGGGGGGV"

```

ORIGIN

```

1  CAATACTAGA ATAACCGGAA GTCGTTCCGG TAGGCGGAAG TCAGAGCGCT AGCAGTAGAG
61  TTAAATTTGG TTTTATTGAA CTTTCGTTAG GCTTTGCTTG CTTGCTTGCT TGTGTATTAA
121 GGGTGAAGTG CCCTTCTACT ATTCAGTAAC GGTACTACTA CGCGTGCAGT ATTGCATGGC
181 CGTTGCATCA ACGCAACGCC AGCGCCTCCT TCTCCATCTT CCAGGCGCTC CTGTAAAAAA
241 CGGGGTGAGA AACACACACA CTACGCTAGG CTCGAACGAT GCCTACTGCG GTTTCCTCTA
301 ATAGTGACGA AGAAGAACAA AAAAATATAA CATAACAAAA ACAAAAATAA CAATCCAACA
361 AATTA AAAAG AAACCACCAG CATCGAAGCG TTCGAGTGCA AAATGCTAAT TATAATTTGT
421 AGTTAGTAGT TGACCGACTT TCTTCCAGCC CCCGGGACTC TTTTCGGCTC GTTTCGCAAT
481 CCTTCCCCTG AAACGACCCT TAAACGCCTC CTCCACCTCC GCCTCCTCCT TCCGCTGTT
541 GATACATAAA CTCCGGCGTG GCGTAGTGCA CCGTATCACA GTAGTAGTGT TCCGGGTTGG
601 GAATCGTCTC CAGCACGTAC CGGGGCCGCT CGTCCTCCTG GGCAGACGGT TTGTCCGGGC
661 CGCCAAACCC GAGCGGTTCC ATCTCGGCCA GATGCCGCGG GACGGGCACC TTCCGGTAGA
721 AGTAGTACTG CGGCTGGCTG GCCGTGTTGT ACGGCGGGCT GAGGATGTCG AAGAAGGCGG
781 CCGGGCCCCG GATCGCCGTT ATCTCGTGAA AGTTCCGCTC GGTCGGCGTC AGCACGGCAC
841 AGTCGCGGCG CGCCGAGCTG ATAATCTTTT CCGGCTCGGC CACCACCAGC ACGTCCCGGC
901 GGAGGGTGCC GCCCTCGGCT CTCGGTTCCA CCGTGTGCGG ACGCGCGATC TCACTGTAGC
961 TGCAGATCTG TACCGCCCCC GACACGACCC GCAGCAGGCC GTGCATCTGG GGGTGGTCGT
1021 GCAGCGGCAT GGTGTAGTTT TCCCGCAGCA CAAACACCGA CATCGCGAAG CGGTCGTTCT
1081 CGAACACGCC GACGTACGTG CAGGGCGCCT TGGTCGGCTG CTGGAACGTT TCCGTCGCGA
1141 CGAGCGACGG TTCCAGCCCA ATGTCCGCCA GCGTAAGCTG GTCGACCAGG CGGCGCAGCG
1201 CGTTCAGATT GCTGGCGAAC TTTGCGTCCC CCGCTCCGGT GTGCTCGAAC GTGGCCCATG
1261 CCTGCCGGAA CACCCGGGCA AACAGGGTGC TCATGGTGGT GGTCACGCGC GGCTATTGCG
1321 CACTCGGTTT GGCAACACTA TTCCGGGCGC TACTGCAGGA CACGGACACA CGCACTACAC
1381 ATACCCGGCA CACACACACA CAGCAGCGAT CGATGTGGTT CCGATGCAAA CGTTGGCCGT
1441 GCTAGTTGTG CTGGATGATC TCCGCAATTA CAGAGTCCGG TTTTCCTTCC GCACCGTGCC

```

1501 CGCACAGGCG ATGTTGTGTT GTTCTGCGTG TGTATGATTT CCCCCAAACT GTTCGCACCT  
 1561 CACTGACAGC GTCGACTGAC AGTTGTAGAG CAGAGCGATA GAGAGAGCGA GGCGGACGTT  
 1621 TGTTCCCTTT TCTTTTGCAG TGTTGCAGTG CAGGCTGCCT CCTTCGGTAA GGATAATTCC  
 1681 ATTTGCAGCT GTTGTGGGAT TGCGTTAAAC TGCGCGCCGG GTGCACGAAA ACTTATTTAA  
 1741 TCCATGCTAC GAAAGGTGCG ATATGTAAC AATTTCAATG ATTGACACTA CCGC

//

LOCUS 31 2043 bp DNA linear PLN 25-FEB-2004

ACCESSION 31

VERSION GeneMark.hmm v3.0 self\_training

ORGANISM A.gambiae

FEATURES CHR ---

CDS join(500..533,613..1410,1503..1543)  
 /translation="MSANKFFVFKDSLIESDDASMSIVSLRNPATRNATKYLFRRRT  
 SKKACNLYEVNCFNEQHRSWFINESVCSNGKIFLPTPIDPLFLVLPYLVEHCSERAV  
 PLDQILIDDKFPCTSQLVEVLPADRSLIADEKRAGSILALKYNETKALEWLVSCH  
 RLSKVIIGTEEGPTARSLNYIKEEKENEKDEDEKSTLHTALGIVSDYLSLEFGRKLSV  
 ALGFPEDENISKRRKSVVDLESVAVVKRIKKEENHDTTP IKLPAAEKKVS AKAKALAK  
 AASGSKMRKAMASWWMEEES"

ORIGIN

1 CTTGAACTCT CTCATCGAGT GGGAAACCTC TAAAGAGAAA TAACAGCGAT TTTTTTAAAG  
 61 CTGATAAAGA AAAGTAAGCG TTAAGCAAGT TCTTGCAAAA CAAAGCAGCG ACGCTTGATC  
 121 GTCAACAATT TTGAATAGTA ACGGTTCTGC CTGTGCATCA TATACACCTT GGGCAGTAAC  
 181 AATGGATGGT AGGCAGTTTG ATTGTGTGAG ATCTTTGCAT CGATTAGAAA GTTTATATTA  
 241 AAATAAAGCA TGATTTGCTC GAAAAATTAA AGCAATTCAA ACGATTCAAT ACATTATGTT  
 301 GGTTTTTACA CATGGAAGAT CCCTGCAGGA CCAATCATAT ATACCTCACC TCAATCATAT  
 361 ATATACTCAC CTTGGTCTCG CCGGGCAGTG TATGTTGCTT GGGAAATGTT TACAAAACAA  
 421 ACCCGCTCCA TAGCATCACA ATTTCCCGCT CAAAAGTGTT TGTTCGCTG TTTCTTTTCT  
 481 TTTTCTGTCC GGCTGCACGA TGTCCGCGAA TAAATTCTTT TTTGTGTTTA AAGGTAGGCC  
 541 CAATTGGAAC CATTTTCGCC ACTACACTGT TGCTAAAACC CATTTTCTTG ATTTTCTTTC  
 601 ATTTTTTTGC AGATTCCCTG ATCGAAAGTG ATGACGCCAG CATGAGCATC GTGTCCCTGC  
 661 GCAATCCTGC GACAAGAAAC GCAACCAAGT ATCTATTCCG GCGTACCTCG AAGAAGGCGT  
 721 GCAACCTTTA CGAAGTGAAC TGCTTCAACG AGCAGCATCG CTCCTGGTTC ATCAACGAAT  
 781 CGGTTTGCTC GAACGGCAA ATCTTCTTAC CCACACCGAT CGATCCGCTG TTTCTCGTGC  
 841 TGCCCTATTT GGTGGAGCAC TGTAGCGAAC GGGCGGTGCC GTTGGATCAA ATCCTGATAG  
 901 ACGATAAGTT CCCGTGCACC TCACAGCTTG TCGAGGTGCT GCCAGCGGAT CGTTTGAGCT  
 961 TGATAGCGGA TGAAAAGCGT GCCGGTTCGA TACTGGCATT GAAGTACAAC GAAACGAAAG  
 1021 CACTGGAATG GCTTGTGAGT AAGTGCCATC GGTTGAGCAA AGTGATCGGT ACGGAGGAAG  
 1081 GTCCAACGGC ACGATCACTG AACTACATCA AGGAAGAGAA GGAAAACGAG AAGGATGAGG  
 1141 ATGAGAAGAG CACACTGCAT ACGGCACTCG GAATCGTGAG TGATTATCTT TCGCTCGAGT  
 1201 TCGGACGGAA ACTTTCGGTG GCGCTGGGAT TCCCCGAGGA TGAAAACATC TCCAAGAAGC  
 1261 GCAATCCGT GGTGATCTG GAATCGGCCG TGGTGAAGCG GATTAAAAAG GAGGAAAATC  
 1321 ACGATAACAAC CCCATAAAG CTACCGGCGG CTGAAAAGAA GGTCTCTGCC AAGGCGAAAG  
 1381 CGCTAGCCAA GGCGGCGAGT GGGTCAAGA GTATTTCTAG CTTCTTTAAA AAATAAAATC  
 1441 CCCCCTCCGT GTGTTAGGTG TGTTACGTTA AAAGCATTAT TATTATTAT ACGTTACATT  
 1501 AGTGCAGAAA GCAATGGCCT CTTGGTGGAT GGAGGAAAGC TGATGGCTAC GAGGAATAGT  
 1561 AAATACATAA TTCTTTGGTT CGACGTGTGC CTCTTTACGT GCCGGGTACG GGTGTCTGCA  
 1621 GTTCTGCTG CTGGCAGAGC GTCACTAGCC GCTCCTGCGC ACCCTGCAGG ATGTTTATTA  
 1681 TCACAACGAC CTTCTGCTTT ACGCGCACCA TACGCTTGAA GTATTCGTGC AGCACGGGAT  
 1741 CGTTCTCGAA GTTGAGATTC TTCATCTCAC CGGACAGTTC TTCCAGCTGC TGGCGCAGTT  
 1801 CGCTCTGTGT TTTGCTTGCC CCGCGGATGT TGTTTTCCAG ATCGTCAATC ACTGGTTTTGA  
 1861 AGAGCCGGAA GAAGCCCTCC GTCAGGATGT CCCGGGTCCG ATTTTTCGCAC AGATTCTCCG  
 1921 TGTTGTCCGT CCGCTCGTGC TCGATCGATG TGAGCGAACT GTCCGAATGA TCGTCCGCCA  
 1981 TCGTGGGTGG GAATGTTTCT GCACAAGGAA GTTTATTTGT AGATGAATAA TAGAGCAAAT  
 2041 AAG

//

LOCUS 32 2875 bp DNA linear PLN 25-FEB-2004

ACCESSION 32

VERSION GeneMark.hmm v3.0 self\_training

ORGANISM A.gambiae

FEATURES CHR ---

CDS complement(join(500..541,620..656,745..1580,2316..2375))  
/translation="MSEKEVVMASRSTWITSIRLKTAYEAHRLLVQTYGKHALGKTQ  
CAVWFGKFKRGDFDIQNKLRGRPPKKFDDGDLQALLDEDDCQTQQQLADRLRVTTRES  
ISVRLKAMRKVHRGGTWPVCELTDROQEKRTICEMLLARHQKPFLLRRLVNGGEKW  
IYFENPKRKKSSSEPTDPAALAAGPSRYAQKTRLCVWVWDRDGVICYELLGPGETVTP  
ERYQLQLIALEQALREKRSEGGDRQDGRITILLHDPVPSHSGKPVEETIAQFRWEAL  
PHVANSPLDFPSSYHLFPVLGFAISNQSRYRNGGKSAYKAMHNVRTMSHNTVQL"

ORIGIN

1 CCCCAGACGAC CAAAAAAGC TTCCACCAGC CGCCGCCAGA TGCGCTAGTG AAAATCGAAA  
61 TTACACTTGC GAGTACGATC AATGTAGCCC GGCCTTAACC TTTTAACTTG TACTGAAAAC  
121 GCAATTAGCA GTGGATACAA CATTTACAGC CAACTCACTG AACGCAAAC GATGCGCACC  
181 GCAAAACAAT GCCTTGATGT GATGATGTTG TTAGAGAAGG GAAGCAGTTA CAATGGTGGT  
241 GAACTCTCCT TTTGGGGGGG GAAATTAAGG CTGCTATGTA CGATGCTTTG TTAGAACATA  
301 GCAATACACA CACACACAGT AACACTCCAC TCCACTTTAC TAAATGCGCT AATATAGCTC  
361 TTTCTATGTA TGCATGGGTC AACAGGAGAA ATTACCGTAT TATAAGTATA CTAGGCACGT  
421 ACGCGCTGTA TAAATAGAAT AAAGATCGCA CCATAATGCA ATAAAGGATC CATAAAGCGC  
481 TGTAGCAATT CTTGCCTGTT CACAGCTGAA CCGTGTGTG CGACATTGTC CGAACATTAT  
541 GCTGGGATGT TTAGAAGACA AACACTTTTA ACACATAAGC ATTGCATAGT TTTTTTTAAT  
601 TATTTTTCAA AATAATTACC ATCGCTTTGT ATGCACTTTT CCCACCGTTC CGGTAGCTGT  
661 TGTA AACCGC GCCAAAAAAA CGACCCATCT TTGGTGCTAA ACCACCTGTC CAGCCACTGT  
721 TCGATATGTT CCAGCGAACC GAACCTCTGA TTGGACAGTG CAAAACCAAG CACGGGAAC  
781 AGATGGTAGC TCGAAGGGAA CAGTCTGGC GAGTTGGCCA CGTGCAGTAA TCGCTCCCAC  
841 CGGAACTGGG GCATCGTTTC CTCTACCGGT TTACCGCTAT GACTGGGCAC GGGCTCGTGC  
901 AGCAAAATGA TTGTCCTACC ATCTTGCCCTA TCGCCGCCCT CTGAACGTTT TTCCCGCAAT  
961 GCCTGTTCCA GTGCAATCAG CTGCAGCTGA TACCGTTCCG GCGTGACCGT TTCGCCCGGT  
1021 CCCAGCAGCT CGTAGCAGAT GACACCGTCC CGGTCCCACC AAACGCACAG CCTGGTCTTC  
1081 TGGGCGTAAC GGCTCGGTCC GGCCGCCAGT GCTGCCGGAT CGGTCCGGCTC GGAGCTGGAC  
1141 TTTTTACGTT TGGGATTTTC AAAGTAAATC CACTTCTCAC CCCCCTTCAC GAGCCGGCGC  
1201 AGAAAGGGCT TCCGCTGGTG GCGGGCGAGC AACATTTTCG ATATCGTTTT GCGCTTCTCC  
1261 TGCTGCCTGT CCGTCAGCTC GCACGGTACC CATGTGCCAC CGCGGTGAAC CTTGCGCATC  
1321 GCTTTACGCC GTACGGAAAT GCTTTTCGCGC GTCACACGGA GCCGGTCCGC GAGCTGCTGT  
1381 TGCGTCTGGC AGTCGTCTC GTCGAGCAGG GCCTGCAGAT CGCCGTCTGC GAACTTTTTT  
1441 GGCGGTCTGC CACGGAGCTT GTTCTGGATG TCGAAATCAC CGCGCTTGAA TTTGCCAAAC  
1501 CATACGGCGC ACTGCGTTTT GCCGAGCGCA TGTTTGCCGT AGGTTTGCAC CAGCAGCCGG  
1561 TGCGCTTCGT AGGCTGTTTT CTTTTGATGG TAGAAGAATA ATAGTGCTGC TCGCAGGTGG  
1621 TGTTTTTTCG GTACAAAGTT CGACATTTTC AGGCACAGGA GGCTAATTTT GTCGGGAGAA  
1681 AGAGATCACA TAACCGTTCA ATATGCGAGT AAACAAACGA AGTACCTAAT GAAACGTAAA  
1741 CAAACCGCAG CGTTTGTTTT GATTACGCTC GCCCAAGGTC TGTATCGTTT CATATAATCA  
1801 CCTTGGTATT TAAATGAAAA AAATAAATTG CAATTACAAC TTAAAAAAGA ATGTATTTTA  
1861 TGCACAACCT GCAGTCAGTC GGTCACTAAG CAAAATTATG ATAGTAAAAT TCCGAATAAA  
1921 GCAACCGCGT TGAATAATCG AACATTTATA TTCATCCACC TTTTTATTCA TCTTATCTTA  
1981 CTGTATCCTA CCCCCCGCG AAAGTCTGTC AACGACGACT ACATCGCAAC TCTATATACC  
2041 GTGTTCCGGAT GCGCTGTCA CGTTGCCATG TCTTCTTCGC CTTTTCTCCT ACTGATCTTT  
2101 GCTCCTAGAG ATGGTACATA TGATTTTGGC CGGATCATAA CGTTCCAGCG TCTTTTTATT  
2161 TATTTAATTT TAGCCCTTAT ACGCCATGAA AAATACACAA ATAATTATTA ATAAGTTTTT  
2221 CTCAATTATT GCAATGATAT TAATATCAGA AATAGTTAAA CGAGATTGAT TTTCTTAAA  
2281 AATGGTAAAA TTCATACCGG AACGGAATGA CTCACCAGCC GGATCGAGGT GATCCATGTT  
2341 GACCGACTGG CCATCACTAC TTCCTTTTCC GACATCTTGA ACTACGTGAA GCACGCGTTT  
2401 TTCGGGTGTA CGAGTATTTT GTTGTAAGTA GTGAAAAATT GTGCCGCTAT TGGCCCGAAA  
2461 AGCCCTCGAA ACGGTGCCGT ACCGATCGCT AACCAGGAAT CGATTCCGCT CCTCTCGTTG

2521 CAGCCTCGGA GAAAGATGAA ATTCAACAAA AATGTTTCGT CGTCCCGGCG CAAGAGCCGC  
2581 AAGCGCCACT TCCAGGCCCC CTCGCACATC CGCAGGAAGA TTATGTCGGC GCCGCTGTCTG  
2641 AAGGAGCTGA AACAGAAGTA CAACGTGCGC TCGATGCCGA TCCGCAAGGA CGACGAGGTG  
2701 CAGGTGGTGC GCGGCCACTA CAAGGGCAAC CAGGTCCGCA AGGTGGTGCA GGTGTACCGC  
2761 AAGAAGTACG TCGTGTACAT TGAGCGCATC CAGCGCGAGA AGGCGAACGG CACGAACGTG  
2821 TACGTCGGTG TGCACCCGTC CAAGTGTGTG ATCGTGAAGC TGAAGATGGA CAAGG

//

LOCUS 33 1980 bp DNA linear PLN 25-FEB-2004

ACCESSION 33

VERSION GeneMark.hmm v3.0 self\_training

ORGANISM A.gambiae

FEATURES CHR ---

CDS complement (500..1480)

/translation="MDSTLDRTYVSDYFANLNEISKKIALDIDEIRGAYEHIWEDLS  
REEQMEIVNETIIKPELALKYFDNFSTSTDSLQRILGTDDDDPTTGGGGEDRNNR  
YDGKRLQTFQYVRTGRKVIITDDSVGLYRDEHSAPFSHKTKSQINLTLFPPDRAEPDA  
KKPHDVSVKAAAGLLAKKLLLKSPKDDANGGPLAKGRDGAATKAKELPAYDSEQN  
IILTEEAYGTKATGAGFLSKFNLI FNQSTALEMTTAASAASINGSDELDDGGALEQD  
EFDADNDKVNLF TKS AKNECLHRAQSSSVEEDDKNYDELNSLLGNSKGFDFLNNW"

ORIGIN

1 ACGCACTACG CCACCGCTTC TACATGCCGT GAGGTTACAA ACGTTCTGTT ATGGAGCATG  
61 ATGTGAGATT ACAATCAGTC TGTTCTGGAA TTGTTTGATA TTTGTTTATT TCGTTCTCTC  
121 GTGTTTGAGT ATTTTCATAAG GTGAGTGGGT TGAGTACTAA GTAGAGAGGT CCTAATAGCG  
181 AGCAAACAGC TAATGCGTCC TCTGCTCCAG AGAAGCAGTG CTCTAGCTAA CTGCAGACTA  
241 AGAAAAAGGC TTTTAAACCG CCAGTGCTTT GGTGCGATTT GCAAGGAAAC AGGGGAAAGA  
301 ATAAGAATAT TTTACAGCCC TCCACTGTCC TGAAACCTAT CCTTTCACCA TGGGATGGGG  
361 CATTAGCGCG GCAGACAGAA CTAAAGCGAC TAGCAGAGGG CTCATGTGTC ATGAGACTTG  
421 GTGTGTTGTG CTTGTGCTAC CGTTACTGCT AAGGCAAGAG GGAAGCTTTC TTTTGTTCG  
481 TTTTGTTCG TCCCTTACTT TACCAGTTGT TGAGAAAATC AAACCCTTTA CTGTTGCCGA  
541 GCAGGCTGTT CAGCTCGTCG TAGTTCCTGT CGTCCTCCTC CACGGACGAG GACTGCGCAC  
601 GGTGAAGGCA CTCGTTTTTG GCGCTCTTGG TGAACAGGTT CACCTTGTCG TTGTCCGCAT  
661 CGAACTCGTC CTGCTCGAGC GCTCCGCCAT CGAGCTCGTC ACTGCCATTG ATCGAAGCAG  
721 CCGATGCGGC CGTCGTCATC TCCAGTGGCG TCGACTGGTT GAAGATGAGG TTGTTAAACT  
781 TGCTCAGGAA GCCGGCCCCG GTTGCTTTGG TACCGTACGC CTCCTCCGTC AGGATGATGT  
841 TCTGCTCGCT GTCGTACGCC GGCAGTTCCT TCGCCTTCGT CGCTGCCGCC CCGTCGCGTC  
901 CCTTCGCCAG CGGCCCTCCG TTCGCGTCGT CCGGTTTCGG TGATTTGAGC AGCAGCTTCT  
961 TGGCCAGCAG CCCGGCCGCC GCCTTCACGC TGACGTCGTG CGGCTTCTTC GCGTCCGGCT  
1021 CGGCCCGGTC CGGTGGGAAG AGGGTGAGAT TGATTTGGCT TTTGGTTTTG TGCGAGAACG  
1081 GCGCCGAATG TTCGTCCCGG TACAGGCCCA CACTGTCGTC CGTGATCACC TTGCGGCCGG  
1141 TGCGCACGTA CTGGAACGTT TGCAGCCGCT TGCCATCGTA CCGGTTGGCG TTGCGGTCTT  
1201 CCTCCCGGCC TCCCCCGGTG GTGGGATCGT CATCATCCGT GCCCAGGATT CGCTGCAGCG  
1261 AATCGGTCGA TGTGAAAAG TTGTCAAAGT ACTTCAGTGC CAGCTCCGGC TTGATGATGG  
1321 TTTTCGTTAC TATCTCCATC TGCTCCTCGC GGCTCAGATC CTCCCAGATG TGCTCGTACG  
1381 CCCC CGTAT TTCGTGATG TCGAGGCGA TCTTTTTCGA GATTTTCGTT AGATTCGCAA  
1441 AGTAATCCGA CACGTACGTG CCGTCCAGTG TGGAGTCCAT CGTGCGCCAA GGCTAACTAC  
1501 GGAATGGGCG GTGGCGAAAT TGTGTAGCGG GGCTGTGCCT TACATTAGCG CCCGAAAGAA  
1561 AGAGGGCCCT TTCGATGCGG TTTTCGCGAGC GATGGGCGCT CGCGTTCACC AGATGCCAAT  
1621 AGCCTCTTAC GCTTATATAG ATGGCAATCA GAGCGTGTCC GACACTGGGC TATGGTGCTG  
1681 CTGCTGCTGC TGGGGAGGAG AGCTGCCCTT TGGTATGTGA TCGGGTGCTC CGTGCATTAC  
1741 CCCC GCTTTA GCCGAACCGT GCGCGAGTGT TCTCGCTCAA TTAATTGACC GTTTCATCGC  
1801 AAATACCCAG CCCAGCCGAT ACAGTATCGA CCCAATCCCC CTACACTCAG GCACACACTA  
1861 CACTCTAGCC TAAATTAAG AACGCGTTTG AGAAGTGGAA CGCCTTTTTG TTGGGTGAAA  
1921 AACTATTTTG TTATGACACT GTTTGACGTC GCCGTCACGG TAGGGAAGAA AAGGTAAATA  
1981

//

LOCUS 34 2145 bp DNA linear PLN 25-FEB-2004  
ACCESSION 34  
VERSION GeneMark.hmm v3.0 self\_training  
ORGANISM A.gambiae  
FEATURES  
CDS join(500..656,731..1124,1204..1645)  
/translation="MKCRIFCAVLLGTLAPFVHSDLRITIGIDRFRVRHVSLSYHSR  
AFLTIESSNVSLVEASWPETVGYQWSRVLSTDGDERGSCRGLTNVLGTDIDRLARLW  
VLCGAGENACPPKLVIRSLSPGTGEIQHRFPTADAEQQRFHAIIVVDPVPASDGDTR  
AFITLFDQDYVLLYSLFKRSIGKLQFQKSDQTSLHPI SLSEVTVNLNRLYVADTVSD  
RLFALPIRNLRQLAFPEDGVRKIIMKTNVTYLGRLLLGRPAGLTLDFRNLLYVLQRD  
GAIVKWTPGRSLKAENHRVILQQGTNITQIILGIGGKAWAVSGEYISEASRRHCLKI  
VV"

ORIGIN

1 TTTGGTCACT CTGTTCAAAT AACTGAATGA GAGCATTGGG TCTCCAATAA TTCAA AATTA  
61 GGGTCTATCG CAGCCATTAG ATCACAACAC ACTGCCCTAC TAACCTGAGC TGTTTATTGA  
121 AGCTGATTGA TCTCCAAAAC ACTTCCAAA CAACGACCCA AACCATCTCA AAGCACGTAC  
181 TACACCACCG TGTTAACGCC TTTTATCACC TAACACCATC TCAAGTTACG TCCAGCGTGT  
241 ACCTCCTCCC ACTGTAAAAC TGCCCGCATT CCGACCTAGC TTCACCGCTG TACCGGCTGA  
301 ACCCGAACCT CTGCAACGAC CTTGCCATGT TCGCATGTTT GTTACCAACA GTCCACCCTT  
361 TGTCCCATCC AACCCCAAGC ATTTTGCCGA CGTCAGCGGA AACCCATTTT TCGAAAGAGA  
421 GGTATGCGCC ACTCAACGGC ACACGCCACA GGCCGCCCCA CTTCAACAAC AGTGGCTGGC  
481 GCTGACGCTT TAGTTCACGA TGAAGTGTG CATCTTTTGC GCGGTACTGC TAGGTACGCT  
541 CCTAGCACCT TTCGTCCACT CGTGGGACCT ACGCACGATT GGGATCGATC GGTTCGCGT  
601 GCGGCACGTT TCACTGTACC ACTCGAGGGC GTTCCTAACG ATTGAGTCAT CGAACGGTGA  
661 GTAGTGGATG AAGCGGCGTG TTACACAATC AAAAAGGGGG CTTAGGTCTA AAATACCTGT  
721 CGCGTTACAG TGTCGTGGT GGAAGCGAGC TGGCCCGAAA CCGTCGGCTA CCAGTGGTGC  
781 CGCGTGCTCT CAACCGACGG CGATGAACGA GGATCGTGCC GCGGGTTGAC GAACGTGCTG  
841 GGCCTGATA TCGATCGGTT AGCACGGCTG TGGGTGCTGT GTGGCGCTGG GGAGAACGCC  
901 TGCCCCCGA AGCTGGTCAT CCGTAGTTTG CTGAGTCCGG GCACGGGTGA GATTACGAC  
961 CGATTTCCCA CAGCTGACGC TGAGCAACAA CGGTTCCATG CGATCGTGGT CGACCCGGTA  
1021 CCGGCAAGCG ACGGTGACAC ACGTGC GTTC ATCACGCTGT TCGATCAGGA CTACGTGCTG  
1081 CTGTACTCGC TGTTCAAACG CTCCATCGGC AAGCTACAAT TTCAGTAAGA CTCGTGTGAC  
1141 CGTCCCTTCA TCTCCGGAAT TGCATTCCAT GCTTACCACT CTCACTCCAA TCATTTGCTC  
1201 CAGAAAAGC GACCAAACCT CACTGCATCC GATCTCACTG TCCGAGGTAA CGGTCAACCT  
1261 GAACCGGCTG TACGTGGCCG ACACGGTGAG CGATCGGCTG TTTGCCCTGC CCATCCGGAA  
1321 CCTGCGCCAG CTCGCCTTCC CGGAGGACGG TGTGCGGAAG ATTATCATGA AAACGAACGT  
1381 CACCTATCTC GGGCGGCTGC TCGGGCGGCC CGCCGGGCTG ACTCTGGATT TCCGCAACAA  
1441 TTTGCTGTAT GTGCTGCAAC GTGACGGTGC GATCGTGAAG TGGACGCCGG GCCGCTCGCT  
1501 GAAGGCCGAG AACCATCGCG TCATTCTCCA GCAGGGCAG AACATTACGC AGATCATTCT  
1561 TGGAATTGGT GGCAAAGCGT GGGCCGTATC CGGGGAGTAC ATATCCGAGG CTTCCAGGCG  
1621 GCACTGTCTG AAGATCGTTG TTTAGGAAGA CTGCTGTCTGA AAAAAGGGAA AGAAA ACTGT  
1681 GATAAAGCGT AAATAAAGTG TGTTTGTAGA TTAACAGAT GTGCCAGAAG AAATTGGAAC  
1741 CTTCTGGAG CAACCTGATA TAGAGCAAAA CAAACAAAAC ATTCCATACA CGTGCCCGAC  
1801 CGGGTTCGAT GACGTCTTTT TGGTGGTGAG ACAAGTTTTT TGTTGTTGTT GTTTTCTGG  
1861 CGAGGCAAAC ATCCTTCCAC AATGATTCCC TGAACCTTGAC CATGGCTCGA CGAGGGTAAA  
1921 CACGCAACCA ACGATGTCCG TGATGTCCGT TACGGTGACA TTGAAATTCG CTAACCGTAC  
1981 TCTAAATCCT TACGATTGCC CAGTGAGAAA CGGCAATGGA GAACCGAAGG AGGGGTTGTG  
2041 AAGGTACACG CCGGGTTCGT TCGTGCAGAA AACTTGTTTT AATGCCTTTT CATTACCAG  
2101 CCGAGGCAAT GCGTCTGGCA CTAGCGGCTC TATCGTATAG AGATG

//

LOCUS 35 2159 bp DNA linear PLN 25-FEB-2004  
ACCESSION 35

VERSION GeneMark.hmm v3.0 self\_training  
 ORGANISM A.gambiae  
 FEATURES CHR ---  
 CDS complement(join(500..1319,1412..1659))  
 /translation="MASQKSTASTSTTTPALAVTNRILRSPSHESFSTDLSLISISV  
 SSMNSEATSVLNRSSCSLLNRTMEEKLGSLLNPKDSKRNRSSTLTERWNESNDLIRN  
 CATLSAALGIHKFSFTTDIYQLPSDQHQLGRLSSSELALTPFQKVGYLFDHSRLEHA  
 SRSYSTWVAVGELASTSQLPSPHGGQSAGQVPTLTTTNPAPSFVTVDLISSVNKKI  
 RQNYIRRLFTTYRALERLSQSEFNLDRLLEAAFAATNPGPTELIVPSTLSNASAS  
 PVGGKSTSSPAPPGGGGGGEALADHPGKKTSGGVARGVHHGPKKHLTFHDIENERGK  
 PLSKYERHMLIFNWLHTIDDTALEIEN"

ORIGIN  
 1 GAGAGAAACA GGAGTTCTCT TGGAACCGAT CAACTAAAAT CCTAAGAGAC ACAGCAAATA  
 61 TAACCTAATA CGTTACGTAG AAGACATCAC ATATCGTATA GAAGTAGTTT TTCCTACATT  
 121 GGAGGTATTC CCTTGATTGC ACACTGATTA GTAGAAAATA ACACAGTTAA TAAGAAGTAC  
 181 TCCAAAAGAG AAGAAGCTTT CCCCTTACAG AAGTGAAGAG TACACGTAAC GACCATTCCA  
 241 CCAAACATCA GCTAAACCTC AAGTAAACTA CAACACACGC ACGAACTCCG AATGCACTTT  
 301 GTGACACTTT GTAAAAGCAG GACGAGACAA ACTTGCTGGG GACGAGGACT TATTCTGGGC  
 361 TCATTTACTT CCTCCTCTCT CTCCCTCTCT TTGTGTGAGT ATGGGTAAAT AAATCTTACT  
 421 CTTTTGTGCA GAAGAGACTT GGGTCGCGTC CTCCTCTTCC TCCTCCTCCT CCTCCTCCTC  
 481 CCGGGAGCTC CTGCGGCGAT CAGTTCTCGA TCTCGAGCGC CGTATCGTCG ATGGTGTGCA  
 541 GCCAGTTGAA GATCAGCATG TGCCGCTCGT ACTTGGACAG CGGTTTGCCG CGCTCGTTCT  
 601 CAATGTCGTG GAAGGTGAGA TGCTTCTTCG GACCGTGATG TACACCGCGA GCAACACCTC  
 661 CGCTTGTCTT TTTACCGGGA TGGTCCGCGA GTGCCTCACC ACCACCACCA CCACCCGGTG  
 721 GTGCCGGTGA GCTGGTCGAT TTTCCACCCA CGGGCGAGGC GGACGCATTG GACAGGCTGG  
 781 TCGAGGGTAC GATCAGCTCG GTTGGCCCCG GATTGGTGGC GGCAAAGGCT GCCCGCTCCA  
 841 GCCGGTCGAG GTTGAATTCG CTCTGGGAGA GCCGCTCCAG CGCACGGTAG GTCGTGAACA  
 901 GCCGGCGGCG GATGTAGTTC TGCCGTATCT TCTTGTGAC CGAGTGATC AGGTCCGTTA  
 961 CGGTGAAGCT CGGTGCGGGC GGGTGGTTCG TGGTCAGTGT CGGTACCTGG CCGGCCGATT  
 1021 GGCCACCGTG CGGGGAGGGA AGTTGCGAGG TGGACGCTAG CTCACCGACC GCTACCCAGG  
 1081 TCGAGTAGGA GCGGGACGCA TGCTCCAGCC GGGAGTGATC GAAAAGGTAC CCGACCTTCT  
 1141 GGAAGGGCGT GAGCGCGAGC TCCGACGAGG ACAGACGGCC AAGTTGGTGC TGATCGGAGG  
 1201 GCAGCTGATA GATGTCGGTC GTGCTGAAGC TCTTGTGGAT GCCCAGTGCG GCCGACAGTG  
 1261 TGGCACAGTT CCGGATGAGA TCGTTACTTT CGTTCCAGCG CTCGGTCAGG GTGGAGGACC  
 1321 TACTTTTACA ATTTGAAAGA AAACCTTAGA AATCACAAC CCCAGATATA TGTAGTGCCC  
 1381 AAAGCCTCCC CCCCCTCAGT TCCTTTCATA CCGATTCTTT TTGCTATCCT TTGGATTGAG  
 1441 CAGACTGCCG AGCTTTTCCT CCATCGTGCG GTTGAGCAGG CTGCAGCTGG ATCGGTTTCCG  
 1501 TACGCTGGTC GCCTCCGAGT TCATGGACGA TACGGAAATC GATATCAGGG ACAGGTCGGT  
 1561 GGAGAAGCTT TCGTGCGACG GCGAGCGCAG GATACGGTTC GTTACCGCTA GCGCCGGTGT  
 1621 GGTGGTGGAG GTGGAGGCGG TACTTTTCTG TGACGCCATT CGTGTTCCGGG ACGCACCGGG  
 1681 GTGGAGTTGT CTGGAATAAA CGCAGAGCGG ATGCCTGATG CTTTATGATC ATTGGAAGTA  
 1741 GTTGGTAGGT GTAGGCTCCA TGCTGTTTGT CTAGTAATAT ACCAGCCCTT CCCTAACCTA  
 1801 CAACTTCCAA CCAGCAGCGG GTGAATACAA ATGAGCTAGC AACCAGGGCTA CCTGAGCCTG  
 1861 GGAGTTTAAA TTTAGAATAG CTGCGACAAC GGATTAATGC CAATCAATTT CCCCCGAATG  
 1921 ATGCGACACC GGGCACCGGG CTCAATAGTT ATAATCGCTT TCACTGCTAA TCGCGATGTA  
 1981 TGGATTATTA AGTAGAGCCA CTGTGTGTCC TTTTTTTCAT CGACACGGTA ATAATCGGAA  
 2041 GGTTTCAGTA TTTTGTTCCT GTTCCTATGA AAGGATGTAG TGAGCGGTTG CAGAGCTCTA  
 2101 GAGATGGACG GTACGCGATA CCGGTTGATA TGCATGAAAG CCGTGGCAGG CGTTCGTGTC

//

LOCUS 36 2259 bp DNA linear PLN 25-FEB-2004  
 ACCESSION 36  
 VERSION GeneMark.hmm v3.0 self\_training  
 ORGANISM A.gambiae  
 FEATURES CHR ---  
 CDS complement(join(500..1259,1325..1533,1634..1759))



/translation="MSEATNEIPLDRKLEIFDEGYSAMNRLDENAAALPSNAPEFQV  
 AVKKTIGHFEDATRLVSLVGMFSTNESYEEVPTENLRYFLLPFFLGKMTLRLCNTNR  
 EEVVEVAEVYFKDFLARCENYKLYETPDRDTGELAIVPGGQSDKIRELQRMGAQRNE  
 KIRKFQEKELDEKVKQLRYVVEQPEAKIDDETKREFFLSLLKSAVLEAQEELESVA  
 REKQMLQYRAAAKLRGEEEELEEASHGAFGGGTNKRPPVQPLKPIIITRDAVQKAVYG  
 RGYPSLPTMTVAEFYEQRVAEGIFPDPERMKEVNKNSLMNRVHMDNAAEQDREDEQQ  
 EQLIERDDEEYLARQRAKDEFKDEHRRGEGNRYNRS"

ORIGIN

1 CAGGGTAAGG GAGGCGCCGG CGGTGGTACG AAGAAGGTGA AGGAGGAAAT TTCCGACGCG  
 61 AGCAGCGCCA CCATCCTGCC CGCGGACAAC ACGACGGAGC TGATCAGTGC GGACGAATCG  
 121 CTGCTGGAAA CGAAGCTGGA GGAGGAGGAG GAGATACAGC CGGACGATGA CGGCTGGGTC  
 181 AAGATGAAGG ACGGCATAAT ACGCACCGAG TGGAACGCGG GTGACCTGAA CGTGGTGCGC  
 241 GAGTACGTCG TCGAGTTTGT GGAGGATTGC AAGGAGATTG AAATATAATA ATACGTACGT  
 301 TGTGTAAGCT TAACAATTTA TCCAAAATCA CGAAATACAT TCATATTGCC GCAGCGCATT  
 361 CCGCGAACGC ACTTCTCTAT TTTTTTTATG AAGCTACCGC AACATGCCGA GTGAGTTGTT  
 421 GTGATCGTGT GTGGTAAAAG AGAAAAGGAA AAATACAAAC TAATTTTCGAA CGAACCGCAC  
 481 AGTAGGCGTC AAAGCCCCCT TAGCTACGGT TGTACCGGTT GCCCTCGCCA CGGCGATGCT  
 541 CATCCTTAAA CTCGTCCTTT GCCCGCTGCC GGGCCAGGTA CTCCTCGTCG TCCCCTCGA  
 601 TCAGCTGCTC CTGCTGCTCG TCCTCGCGAT CCTGCTCGGC CGCATTGTCC ATGTGCACCC  
 661 GGTTTCATGAG CGAGTTTTTG TTCACCTCCT TCATCCGTTT CGGGTCGGGG AAGATGCCCT  
 721 CCGTACCCG CTGCTCGTAA AACTCAGCCA CCGTCATGGT GGGCAGGCTG GGGTAGCCCC  
 781 GCCCGTACAC GGCCTTCTGT ACCGCGTCCC GCGTAATGAT GATCGGCTTC AGCGGTTGCA  
 841 CCGGCGGTCG CTTGTTGGTG CCGCCCCGA ACGCACCGTG GCTTGCTTCC TCCAGCTCTT  
 901 CCTCGCCCCG CAGTTTGGCG GCCGCCGGT ACTGCAGCAT CTGTTTTTCG CGCGCCACAC  
 961 TTTCCAGCTC CTCCTGCGCC TCCAGGACGG CCGATTTGAG CAGGGAGAGG AAAAAGTTCG  
 1021 GCTTCGTCTC GTCGTCGATT TTCGCCTCCG GCTGCTCGAC CACGTACCGC AGCTGCTTGA  
 1081 CCTTTTCGTC CAGCTCCTTC TTCTCCTGGA ATTTGCGGAT CTTTTCGTTG CGCTGTGCGC  
 1141 CCATTGCTG CAGCTCGCGT ATCTTGTCG TCTGCCACC GGGCACAATG GCCAGTTCG  
 1201 CCGTGTCCCG GTCGGGCGTT TCGTACAGCT TGTAGTTTTT ACAGCGCGCT AGGAAATCCC  
 1261 TACAAAAAAA GGAAGCGAAA TGAGAATTGT TTACTTTTTA GCGATGTTCA CGCATCAAAC  
 1321 TCACTTAAAG TAAACCTCGG CCACCTCCAC CACCTCCTCG CGGTTTGTGT TGCACAGCCG  
 1381 GAGCGTCATT TTGCCGAGGA AAAAGGGCAG CAGAAAGTAG CGCAGGTTTT CCGTTGGCAC  
 1441 CTCCTCGTAC GATTCGTTTC TGCTGAACAT CCCGACCAGG CTGACGAGCC GGGTAGCATC  
 1501 CTCGAAATGG CCGATCGTTT TCTTTACCGC TACCTGCGGC AGTGGAACAG TTTTCATAAA  
 1561 CGTACAGGGT CAGAGACAAA AAATGGGGGA AAACGTGAAC AAATGCGTTA AAGCCACAAA  
 1621 TCATTAAGT CACCTGAAAT TCGGGTGCAT TCGAAGGCAG TGCCGCATTT TCATCCAAGC  
 1681 GGTTTCATGG GCTGTACCCT TCGTCGAAAA TTTTCGTTT CTTGCGGTCA AGCGGTATTT  
 1741 CGTTGCTCGC CTCGACATT TCGCTCGATC GCACACTGGT TTTCTTTGCA AGCTAGAAAC  
 1801 TATTTGCGAC GTCGTTTGT AATTTTACCA ATTTAACTAC GGAGGGCGAA CGTAATGAGC  
 1861 TGCGGATTGT GTTTTGCTAG CTGCTACCAA AACGTTCCA GGGTTGTTAC GTGCGTTCAG  
 1921 GTGCTCTGAC CTTGTTCTCT ACACACCTTG CACACCTTTG ACAGCTGCAC TGTTTCGGCA  
 1981 ATGTTTGTGTT ACAAACAAT GGAGCAGCTG CAGGGCGAAG GTAATTAGTC AAATTAGCGC  
 2041 GCATTTATTA CATAGTTTAT CATTCTTTAT TGTTTTATTA CACTTTTTTA CATTTTAAGA  
 2101 TGCTGCTACA ACGTCCTGTC CAATGGAGTC GTRACTGACC GCACCGCAA CAGCCGTCCT  
 2161 GCAGCGATTG TGCCGACTGT GCATGCGAGA GTTCCCCTTT CTGCTGCCGT TCAATGCTAC  
 2221 ACTCAAAGAA ATCGCGCTAG CCGACATGCT GGAACGACT

//

LOCUS 37 2097 bp DNA linear PLN 25-FEB-2004  
 ACCESSION 37  
 VERSION GeneMark.hmm v3.0 self\_training  
 ORGANISM A.gambiae  
 FEATURES  
 CDS CHR ---  
 complement (500..1597)  
 /translation="MDCTHSGNGSGVSGTSTGCHKNDLNLVKNIVKILLTTSKYL  
 HCPFCAD EYLF EFTLKHLLKNHERDLEKIVRSPDASIRFCESNICPYCGALFYIIS

ALPKHIMNSHSRECLMKWQAI EQENSLVRKLANDPSIQCVPCSPGLSDFFDELTTTT  
TAAATGGDAGRPTAASRNIMQLTKPSPLLKTALRNVNRI TVAANGNGGIDPTGTSA  
WSSFQFDGAQTRRSSNLTNQSVRRELNFGDDRSSGRREDGCSVPVSGSPSLCNLIAGS  
CSPSPSSESISSARKPKFQRKRFNLRSIKPKLNFRKYVLSKFSKKYHCKIVTSTPNN  
FLDDGLSSGGGCGGGSSRDTRFLHNQERWNRIHFE "

ORIGIN

1 CCTACTACGG CTACGATTGC ATTGGCAGCT CATCGTACCC GATCACAGAT GACGATCGTT  
61 TTCGTTTTTCG ATCAAAATCT TCCAATCGCC GAAGAATGGA CCCTCCTGGT GGAAGTATAG  
121 CGGCAATGTG ATACAACGCC TATTTTAAAC GCTCTCTGCC ACATTCTGGA ACTGTTGGAA  
181 AGTTAACAAA CTGCTTCTTT TGCTGCAAAG CAAACTACAC AACTTTCCAC CAGTTCACCA  
241 ATTTGCTCTC TATGGGTTCT CTCTCTCTCT CTCTCTAGGA AAGAAATGAT TGCACAGCCA  
301 AGTTTTGGTA CATCTCGTTG CACGCTATCC GCTTAACGGT TGGTTTGTGT TGGCCATTGG  
361 CAGGGTTGGC CAACGGGTAA AAAAAATGGAA TTAGTTGAAA CGAACGAGAG GCAAACGAAC  
421 GGGCTTCGCC TTACACGCAG CAAAACAGCA GCCCGCACAG ATACTCGACG ACGCACGAAA  
481 ACGGCGACCC ATACCTTCGT CATTGCAAGT GAATCCGGTT CCAGCGCTCC TGGTTGTGCA  
541 GGAAGCGGGT CGTGTGCGGG CTGCTGCCGC CGCCGCCGCA GCCGCCACCA CTGCTCAGCC  
601 CATCGTCCAG GAAGTTGTTC GCGCTGCTGG TAACGATCTT GCAGTGGTAC TTTTTCGAAA  
661 ACTTCGACAG CACGTA CTG CCGAAGTTAA GCTTCGGCTT GATGGAGCGC AGATTGAAGC  
721 GCTTGCCTG GAACTTGGGC TTGCGGGCGG ACGAGATCGA TTCGCTGCTC GCGGAGGGGG  
781 AGCAGCTGCC CGCGATCAGG TTGCAGAGCG ACGGCGAGCC ACTGACGGGC GAGCAACCGT  
841 CCTCCCGCCG GCCGGACGAC CGATCGTCGC CGAAGTTTAG CTCGCGTCGG ACGGATTGGT  
901 TGGTGAGGTT GCTGCTGCGG CGCGTTTGC CACCGTCGAA CCCGAAGCTC GACCAGGCGG  
961 ACGTGCCGGT TGGATCGATG CCACCGTTGC CACCGTTCGC GGCCACCGTA ATCCTGTTCA  
1021 CGTTGCGCAG GGCCGTCTTG AGCAGGGGCG ACGGTTTGGT AAGCTGCATG ATGTTTCTGC  
1081 TAGCGGCGGT CGGGCGACCT GCGTCGCCAC CCGTAGCCGC CGCCGTCGTC GTCGTCGTAA  
1141 GCTCGTCGAA AAAGTCGCTC AGCCC GGCG AACAGGGCAC GCACTGGATG CTCGGATCGT  
1201 TCGCCAGCTT GCGCACCAGG CTGTTCTCCT GCTCGATCGC TTGCCACTTC ATCAGACACT  
1261 CGCAGCTGTG GCTGTTCATG ATATGCTTGG GCAGGGCGGA GATGTAGTAG AACAGGGCGC  
1321 CACAGTACGG GCAGATGTTG CTCTCGCAGA ACCGGATGCT GCGTCCGGC GCGGGACAA  
1381 TCTTCTCCAG GTCGCGCTCG TGTTTCTTCA CAGATGGTG CTTGAGCGTG AACTCGAACA  
1441 GATACTCGTC GGCACAGAAC GGGCAGTGCA GGTACTTCGA GGTGGTCAGC AGTATCTTGA  
1501 CGATATTCTT TACCAGCAGG TTCAGGTCGT TCTTGTGGCA TCCGGTGCTG GTGCCGCTTA  
1561 CGCCACTGCC ACCATTACCG CTGTGGGTGC AATCCATCAT CCTATTGGCA GCGGAAGTGT  
1621 GTGTGTGTGA TTTCTCCTT CCGGAAAGT GGCACGTTTA TTACACACAG CACAGCAGTT  
1681 CACTGTAACG ACGGTTGGGG CGTACTGTTT CTTTGTATCC CGCTATTACT CGCATGGGAG  
1741 CTGCCGGGCA CGGGTTGATC CAGGGAAGGA GTAATGGCAC AAAAGAAAAT CCCCAGAAA  
1801 AAGAAACGGA TATCGGTCAA CTCCAAGCAC TGCCTACTTT ACACGCCCGA CGAAACAGTA  
1861 GAAAGTGGTG CAACGAAAGC AGCAGCGCTC GCACGGCGAC CCTCACACGT TAGTGTCCGT  
1921 TGGCCGTCCG CCGATCGATG CGAATGATGT ATGATGCGCT GGTGGTGCTG CTGCGGTGGT  
1981 GCACCGATGC AGGTAAGCGA AGTGCAACGG CATGGAACGG GCACAGCGCG CGCGTCCGGA  
2041 GCAGCCAGAG CGGGATGGAA TGAGCGACAC AGAGAGAGAA AGAGGGGAGA GAAAGAA

//

LOCUS 38 2347 bp DNA linear PLN 25-FEB-2004  
ACCESSION 38  
VERSION GeneMark.hmm v3.0 self\_training  
ORGANISM A.gambiae  
FEATURES  
CDS join(500..544,613..898,978..1500,1580..1847)  
/translation="MDALSTVRTYEQFQQDFPHWLLNVRNPAELFNAQPSYVVSQAL  
CIIGLLSLAHALHRGGRWPFLLMAGALTGVLVEGSMYFSPYGETIWFSPPTVIDLFH  
QRIPLFIFFVYPFFYYQACWAASKLQKCRWSEHIAAGLLVVLADLPDMVSIKFLH  
WTLHDTEQLLSERVYSAPWTLFFFVAVASFAYSYLFHNLRSWMDRSVGTPOPTDRRW  
VVGITGAELVAMVGAASVLSVGTGLFLAFSYPLHTVLGIPHRIIVIGVFLCVATVF  
WKFDRKSNRRMPMSQSLLDHALNVIIVGHFVLYFVLAFLVLPEDTVSSGRHQPIGDC  
HHTTGTNAPPLCLDTFSRTDYDFHCISKPPNVGTYWYTVCGTPYE "

ORIGIN

```

1   GTGATACAAA ACAGCCTGCT AGAAAATCGA GTTGTGCATT CTCTTTTGGCA CATATGACCC
61  GATTTGGGAC GTCGAACCTT TTGTTAATTA ATTTTAATTA AAACAAAAAA GCTTACCGAA
121 CAAATATTTT ACCAATCGGA CCTGAACCTA CGTGTAGCAA TTTACGAACA ATTAATAAAAA
181 AACGAACAAA GAAACTAATA AAACATTATT TAAATCGCTT TACTTTACCT TTACGGTTGT
241 TTTTTTTTAA AATATTTTTT GAATCATTTT TCCCTCCTGC CGTGTGTCCT TCAAAAAGGC
301 TATCGGCAAG GTTACATGGT ACGGGTACGT GTGTGTGTGC GTGTGCTCAG TCCAAATTTT
361 TTCAAAGAT  TGCAGATTAC AATTACAAAG TCCCTCCCCT GCCTGCTGCC ACACCATGAG
421 CGATAAATGA ACGAGCGCTG ACGTTCTCAG TTGTGTTTTA ATCTTTAAAC GTCGAATGAC
481 GGACACAAAA ACACTGAACA TGGATGCCCT TTCGACCGTA CGTACTTACG AGCAGTTCCA
541 GCAGGTAATT TCATAGTTTA AAAACATAAT AAATAAATTTC TAATTCATAG TAACATACCT
601 TTCTGGCTGT AGGATTTCCC ACACTGGCTG CTGAACGTGC GCAATCCGGC GGAACGTTC
661 AACGCGCAAC CGAGCTACGT CGTTAGTCAA GCTCTCTGCA TCATTGGTGG ATTGCTGAGC
721 CTAGCACACG CCTTACACCG GGGCGGCAGA TGGCCCTTCC TGTGGATGGC CGGTGCGCTA
781 ACCGGGGTGC TGGTCGAAGG TTCCATGTAC TTTTCGCCGT ACGGTGAAAC GATCTGGTTC
841 AGCCCCACCG TGATCGATCT GTTTCATCAG CGTATACCGT TGTTCATATT TTTTCGTCTGT
901 AAGTAATGGA TCGGATCGGA AGTTCATAGT CCATGAAGTA CATACTTTAA TTGTATTTCT
961 ACTTCTTTTT CTACCAGATC CTTTTTTCTA CTATCAAGCT TGTTGGGCTG CTTCGAAGCT
1021 GCAGCTCAAG TGTCGCTGGT CGGAACATAT CGCCGCCGGG CTGTTGGTAG TGCTGGCCGA
1081 TTTGCCCTTC GACATGGTTA GCATTA AATT TCTCCACTGG ACGCTGCACG ACACCGAGCA
1141 GCTGCTGAGC GAGCGCGTCT ACTCCGCCCC GTGGACGCTG TTGCTGTTCT TTGCCGTGGC
1201 CAGCTTCGCC TTTTCCTATC TGTTTTCAAA CTTGCGCAGC TGGATGGATC GGTCAGTGGG
1261 GACCCCCCAA CCGACGGATC GTCGCTGGGT GGTGGGGACA ATCGGAGCGG AGCTAGTGGC
1321 AATGGTCGGG GCTGCCAGTG TTTCCCTTTC CGTTGGAACG GGTCTGTTCC TTGCGTTCAG
1381 CTATCCCCTG CACACCGTGC TTGGCATTCC CCATCGGATC ATCGTGATCG GTGTGTTCTT
1441 GTGTGTGGCG ACCGTTTTTCT GGAAGTTTGA TCGTAAAAGC AATCGCCGGA TGCCAATGAG
1501 GTAAGTGC GA CAAGGA AACTT GTCCTTGC GT TCGACCTATT TAAAGATGAA GTTGCTTGCT
1561 TTTTCGGGTG GGTTTTTTAG CAATCTCTGC TGGATCACGC ATTGAATGTC ATCACAGTGG
1621 GACCTTTTGT GCTGTACTTT GTGCTTG CAT TCGTCCTAAA CCCAGAAGAT ACTGTTTCGA
1681 GCGGTAGACA TCAACCGATT GGCGATTGTC ACCATACGAC TGGTACCAAC GTCCTCCAC
1741 TCTGTCTCGA TACGTT CAGC AGGACCGATT ATGATTTCCA CTGCATTT CG AAGCCACCGA
1801 ACGTTGGCAC TTATTGGTAC ACGGTCTGTG GCACGCCGTA CGAGTAAGTG GAAACATTTG
1861 CCTTGATTTT TCAGCACCTT TCTATTTAAA TTGTCTTTTA TACCAGGAAT CGAGCGGAAT
1921 TTTTGTTTCGC AATGGCAGTT ATAACATTTA TTGCCGCGCT CGTACATTGG ACAATTCACT
1981 ATGACTTTGA TGTGCGGTTT AAAATCTACG ACTTTGTCAA GCGAACTTCA TCGGTCAAGG
2041 GTGGAAACAA TAAGAAGGTT TTGTAATATG TTTAACTGGT GTAATAATAC AAAAAACAT
2101 GTTTAAAATA TTTGGTGCAT TTTCACTGCA AACACACACG TGGGCTTTGT TTATTGTATA
2161 TTTGCTTTAT CCGTATCAGC TGACTGGATT TGGGCGACAA AAAGAGGGGG TGGGGAAACA
2221 AAAGTAAAC TTATAATTTA TTGCACAAAC AGAAAGTACA ATGCTACACC TATCAACACA
2281 GCCACTACTG GCGCTACGTA AACCGCCCAA TGCGTTCCT TTTCTCCTG CTGCACCTGG
2341 TGCCGCT

```

//

```

LOCUS      39      2203 bp      DNA      linear PLN 25-FEB-2004
ACCESSION  39
VERSION    GeneMark.hmm v3.0 self_training
ORGANISM   A.gambiae
FEATURES   CHR ---
           CDS      complement(join(500..1488,1565..1703))
           /translation="MWKLFKDLRLIGGLARRSSTVPHTNPTLCRSLSSSTAKSNSEPF
           LSYEKDPAPAFLRDDVQQLLKSITRLELDKVFVRKRSVKDNTVEYRFMTDEQLRRELL
           HSIEQAQQLMQMPVQEQDSCRVISKDGALKSLSTSKFVFTDITYGLKNSQRSIV
           VRHPDGTLQEAPYEMRKRLNQIYFPLTGRSIHQPPMFEDEHLQRLLEEGKYEFVLDL
           ACVQFEPYEKDYHHITAKVYQHINESRSFDALRSTRHFGPFVFFLAWHKLIDDL
           MIKQDYLRNGIELIVLYSTLHGMPIDEGVKQIALQTQMPSLFDAAEKSVDELKQDEQ
           YLSIEQFVNGQATKKVQLNLAVQAYREMAAEKLRRLAQGIRRMHGES"

```

ORIGIN

```

1   GTAAGCCCCC TAAAATTACC GATTTTTTCAT TTAGGGCGGT GGCAACGCTG CTCCGATGCG
61  ATTTTATAAA AGGTTTCCTGC AAGGTTTTGT TCCACGGAAG GACCTTTGTT TACATTTTTTC
121 CGAAAAATTG CCAAGCTTTA TCGATCGGCG AAGGACGTTG GTTCTAGCGA CCTTGGCTAG
181 AATGTCAGCG GCCAGGGCTT TTGCCTTCGG TCGGTGTGTC TCTGCAAATT GAGACGGAAT
241 AATTCAACCG TTGGCGAATC TTCACGCTAA ATTAAGGGAT TATTTTCAAC AAAATATTTG
301 CATTCTATT TTCTATCGAT TTTCGATGCA TTCACAGCCG CTAATTTTCA TTCTTTCGTT
361 TCTCCTGCAG CAATACCACC GTTCGGTACA GGAAGTCGCA CTTCGCGGAA CGTTATGTAT
421 TTTTCGTTTTA TTTTCTCGTT CTCAACCTAC ACACTACACA TTTAACCTCG ACGTCCCATT
481 ACGTCGACGT CCCACCCATT CAGCTTTCCC CATGCATCCT CCTGATGCCC TGCCTAGCC
541 GAAGTCTCTC CGCTGCCATC TCACGGTACG CCTGTACGGC CAGGTTTCAG TGCACCTTCT
601 TTGTGGCCTG CCCGTTACA AACTGCTCTA TGATCGACAG GACTGTTCG TCCCTGCTTCA
661 ACTCGTCGAC CGACTTTTCG GCCGCATCAA ACAAGCTGGG CATTGCGTT TGGAGTGCAA
721 TCTGTTTCAC GCCCTCGTCG ATCGGCATAC CGTGCAGCGT GGAGTAGAGC ACGATCAGCT
781 CAATCCGTT GCGCAGATAG TCCTGTTTGA TCATGTCCAG CAGCAGATCG TCGATCAGCT
841 TGTGCCAGGC AAGGAAGAAC ACAAACGGAC CAAAGTGGCG CGTCGACCGC AGTGCCTCGA
901 ACGATCGGCT TTCGTTGATG TGCTGGTACA CTTTGGCCGT GATGTGGTGG TAGTCTTCT
961 CGTACGGCTC GAACTGTACG CAGGCCCGAT CCAGCACGAA CTCGTAATTG CCCTCCTCGA
1021 GCAGACGCTG CAGATGCTCG TCCTCGAACA TCGGTGGCTG GTGGATGGAG CGGCCGGTGA
1081 GCGGGAAGTA GATCTGGTTC AGACGTTGC GCATCTCGTA CGGCGTTCC TGCAGCGTGC
1141 CGTCCGGATG GCGCACCACG ATCGAGCGCT GACTGTTCTT CAACCCGTAC GTGATGTCGG
1201 TAAAGACGAA CTTTCGAGGTG GAAAGTGACT TGAGCGCGCC GTCCTTCGAT ATGACACGGC
1261 AGCTGTCCTG CTGTTCCCTG ACGACCGGTG GCATCTGCAG CATCTGTTGG GCCTGCTCGA
1321 TCGAATGCAG CAGCTCGCGT CGCAGCTGCT CGTCGGTCAT GAACCGATAC TCGACCGTGT
1381 TATCTTTGAC CGAGCGCTTC CGGAACACCT TGTCCAGCTC CAGCCGCGTA ATGGACTTGA
1441 GCAGCTGCTG CACATCGTCG CGCAGGAATG CAGGTGCCGG ATCCTTCTCT GCAAAGGTAG
1501 CGAGGAATGG GTTGGATAGA TTTCGTGGCA AAGCACACAC ACGACGGCCG GGACCAACAC
1561 TCACCGTAGC TAAGGAAAGG TTCACTGTTG GACTTGGCTG TGGAGCTTAG CGAGCGACAC
1621 AAGGTCGGAT TGGTATGAGG AACTGTACTA CTTTCGCTTG CCAAACCACC GATCAGGCGG
1681 AGATCTTTAA ACAGCTTCCA CATCCTTTTA GTTGGAGCAG ACTCTGTGGA AAGTATTGTA
1741 TAATTTGTAG CACGTTTGTT TGGAGTCGGC AAATTTACAC TGCGAAGAAA AACATCACCG
1801 AACGAAACGT CAAACAAAAC ATGGGTGAGC TGCTGACCAC ACGAAGCCAA ATTGGTTTTGT
1861 TTTTTCGTTG TGCATTTTTT ATAACGAATC GGTTGATATT TTGCCTATAA AAAATACGCA
1921 AAATTATTTT CTCAAATAAT TCTACATTCC GGATAAAATT GTAAAGAGCA AAAATTAAT
1981 TACGCTGCAC TGTGGGACGC TGCACCAGGC TGACAGCAGA ACGCGCTGAC AGTTGAAAGA
2041 CCGTTCCTTC AACCGGTTTC GAACCCCTTC CCCCCTCCTC CAGTAGGCAG CAGCACTGCC
2101 CCGATAGTTG CCCGATTCTC GCTGGTGCTA ATCCGCGCTT CATTGGACGA TTCGAGTGCA
2161 GAAAACGCTC AAGAGGTGAA CACACACATT TTTTGCCTCA ATT

```

//

```

LOCUS           40      2172 bp      DNA      linear PLN 25-FEB-2004
ACCESSION      40
VERSION        GeneMark.hmm v3.0 self_training
ORGANISM       A.gambiae
FEATURES
  CDS           500..1672
                /translation="MVGPSQVSKILLSLLFLLIAFFAWMDVNLYIRIQDYPIRDTD
                PFLLAANSTLLKPAPAGSHPSTVTSPLLAASSMPLQLNRHIVRYEDVAWVNCDLNP
                LCDVTVKAMMLDHTNHYLFAP IATIVDNVAGFSQGD LVTPNMI SFFHFVFAIAAGRM
                IASDSLGYRRIGVVLQFR TFLDDLDGHVARAKKHIRGERSDIGSAGYYIDGICDGL
                GCIALMIGVFVFLKNNPPRRGYTQLQSIIPVSESKSGSESGVIYKVKVTTTKVARKV
                LCYTGMLVLSSTGWNRYIAIYQDMLERENVTPAQYLHQESVFRSTGFFVIAWLWRIF
                NVHALLHFLLSVFCDKLWEYLRMIQYAGYVALLV IISFAEMHLLGVQTFIYKSLTV
                NNTSL"

```

ORIGIN

```

1   TTGTTGTGAG GCACATCGTG GGTGTGCCCC GATCGCGAAG GAAAGGACGC TAGCGCGCAG

```

```

61 TGACCGAACG AACAAACGGA CGGGAGCAAA ACGAACGGTT CTTAGTAGTA GTTGGTGTCTG
121 TTGTCTGTTGT GTTGGTCTGTG GTAGTAGTGG TGTTTTAGTC ATTGTCCACC TGTCAGTCAG
181 GGACCACAGG GGGACCGTGT CAGAGTCGCG CTGGTCAGTT AGTCTTTTGT GGTTCGATTGT
241 CACACACACA ATCCTTGAAG TCTGGGAAGT GTACCCAATA GTTGTTAAGT TAAGTTGTTG
301 TTATCACCTC CATAGGGAAG TGGGAATATA GTTGTAGGTT AACTACAGAG AGAGAGAGAG
361 ATAAATAGGG AACGATAAGG TTAACATAG TGAATACAT CTAGGAAAGG TTTTTTTTTT
421 TATTTTAACG TATTGTTTGA AGGACCAAAA AGTAATCCTA TTTATAGCAG AACGGTACAC
481 AACACGAGTA AAAACAACCA TGGTGGGTCC GAGTTCGCAG GTCAGCAAAA TACTGCTGTC
541 GCTGCTGTTT CTGCTCATCG CGTTCCTCGC CTGGATGGAC GTGAACCTGT ACATTTCGCAT
601 CCAGGACTAT CCGATCCGGG ACACCGATCC GTTCCTGCTG GCCGCCAACA GCACGCTGCT
661 GAAGCCCGCC CCAGCCGGTA GCCACCCGAG CACGGTCACC TCACCCCTGC TTGCCGCTGC
721 CTCCTCGATG CCGCTGCAAC TGAACCGACA CATCGTCCGG TACGAAGACG TTGCCCTGGGT
781 CAACTGTGAC CTGAACCCGC TCTGTGACGT CACCGTCAAA GCGATGATGC TGGACCACAC
841 GAACCACTAC CTGTTTCGCAC CGATCGCAAC GATCGTCGAC AATGTGGCCG GCTTTTCCCA
901 GGGCGATCTG GTCACCCCGA ACATGATCTC CTTTTTCCAC GTGTTTCGTCG CGATCGCGGC
961 CGGCCGGATG ATTGCGTCCG ATTCGCTCGG CTACCGGCGG ATCGGGGTGG TGCTGTTCCA
1021 GTTCCGCACC TTTCTGGACG ATCTGGACGG GCATGTGGCG CGGGCGAAGA AACACATCCG
1081 CGGCGAACGA TCGGACATTG GTTCGGCGGG CTAATACATC GACGGGATCT GCGACGGGCT
1141 CGGGTGCATT GCGCTGATGA TTGGGGTGTG TGTGTTTTTG AAAACAATC CACCCCGACG
1201 GGGATACACC CAGCTGCAGT CGATCATAAC GGTGTCGGAG TCAAAGTCCG GGTCCGAGTC
1261 GGGCGTCATT TACAAGGTCA AGGTAACGAC GAAGAAGGTC GCCCGGAAGG TGCTGTGCTA
1321 CACCGGCATG CTGGTGCTCA GCTCGACCGG CTGGAACCGG TACATCGCGA TCTACCAGGA
1381 TATGCTCGAG CGGGAGAATG TGACGCCGGC CCAGTACCTG CACCAGGAGT CGGTGTTCGG
1441 GTCGACCGGG TTCTTCGTGA TCGCCTGGCT GTGGCGCATC TTTAACGTGC ACGCGCTGCT
1501 CCACTTTCTG CTGCTGAGCG TGTTCTGTGA TAAGCTGTGG GAGTACCTGC GCATGATCCA
1561 GTACGCCGGG TACGTGGCGC TGCTCGTGAT CATCAGCTTC GCCGAGATGC ATCTGCTCGG
1621 CGTGCAGACG TTCATCTACA AGTCGCTCAC GGTCAACAAT ACCTCGTTGT GATTGCGCTA
1681 AACATTGCGC AAAAAAGCGC CTTGCGGGCT TGTCAACGAT TGTGTTTTTA TTGACTCTTT
1741 TTATTTTCAGT TTCATCATT ATTGTATTTT GTGTTTTGTG TCCCCATACA CGTGTGTGCC
1801 CACGTGTATA TGTGTGTTTA TGATTATATT ATACAGGCGT GCGGTGTGTA AGTGTAGAC
1861 ATTTTCACCG CAAACCCCT CCACCCTTTT CCGTCACTGA AACATTACGA AAACCACGAA
1921 ATTATTATCA ACAAATGCTA AAACAATAAG CAGCCCTCCC TTCCTTATTA AGCCTAAGAA
1981 GAAGCGTTTTA AAGCAGGTGT GAATGGATTA AGTTGCGCGC TCGAACCTAG TAAGAGTATT
2041 GCAATTGCAT TCGGACGGTT AGGACGTCCG TTATGTATGT GTGTGTGTGT TTTTGTTTTT
2101 TGTTTTAGAT GAGATCATTG TATATCTACA TATTATGTAT GTGTTGTATA GTGTGATACA
2161 AGCGCGAACC GG

```

//

```

LOCUS          41      2326 bp      DNA      linear PLN 25-FEB-2004
ACCESSION     41
VERSION       GeneMark.hmm v3.0 self_training
ORGANISM      A.gambiae
FEATURES
  CDS          CHR      ---
              complement(join(500..1650,1727..1826))
              /translation="MITIDRRLAAGVLLLVLCLLPFLCHGKEAETQKDLMFLEPGRLV
              SYTYDEWSITRPLIVYCYPGQESLLNAFCTVSI RMHCDHDNYNQYLGSSPAEVKK
              HYKAEQSLFSFNVFASRKRQVELEPFNQSCLGVVSSGKYDIEVLLNRFDLWRVGLL
              VLGVLLFFIALPMSQNPLFYTTGGILIGLTSFALALVYMF SKMMPYRPLMLGVMVSG
              WTLGFYGMQMMYENLRLIFVLYQHYVFWYLAIVGSI SFFVCYRLGPPKDRRSKRVIQ
              WTLQLIALTMVFFSSYQRQLSTGFVLIVIGAYYHATPLNALHWVRNFRSRYPGKRR
              LLTVEEFEEQGRIETDRALKDLREYCRSPECKQWTTMMRLRDPVRFASFVEGSPHVM
              EEECFEYDTHSSISNDDSDEVVELTEGEED"

```

ORIGIN

```

1 TTCTTACGTT TATTTACATA TTTTATGCTC ACAAGACACG CGGCAGGCC C TTCGCGGCAC
61 AAAAGCTGCT GGCACAAGTA GTTACTTTTA ACCTTTTTTA CCGAATCTAC CATCATCTCC
121 GCTACGATCA AGTCTTATTG TCTCAACTAG AGGCATTTAG TATGGCCGGT TACAACAACA

```

```

181 AACATTAATT AGGTTTATCA CCACACACGC CTGGATAAGT TTCACTATCA GTATGAACAT
241 TTGCCATAAT TTTTCGAGGCA GCTGCTGATG TATCTACAAT AATGATTACC TAAGCATCGA
301 AGTAAAGCAT TTGACAATAT TGGTGCTGCC GATATCAGAA ACGATAGGTA AAGTTAAAAT
361 GTAAGCCGAA AGTTCTATGA ATATTACCTC CAATTTCTAT AGAGTGTTCC GCTTTGCTTT
421 GAGTGATGAT GTGTATCTCT ATTTGTTCGA GATAGAACCC CTAAACTGGC AAACATTATC
481 AGCGCCAACC GCCCCCCGAT CAGTCCTCTT CGCCTTCGGT CAATTCCACC ACCTCGTCCG
541 AGTCGTCGTT GCTGATGCTC GAGTGTAACG TATCGTACTC GAAGCACTCC TCCTCCATCA
601 CGTGCGGCGA TCCCTCGACG AACGACGCGA ACCGTACCGG ATCCCTCAAC CTCATCATCG
661 TCGTCCACTG CTTGCACTCC GGGCTGCGGC AGTACTCGCG CAGATCCTTC AGCGCACGGT
721 CCGTCTCGAT CCGGCCCTGC TCCTCGAACT CTTCCACCGT CAGCAACCGT CGCTTGCCCG
781 GATACCCGCT GCGGAACCGG TTGCGTACCC AGTGCAGCGC GTTCAACGGT GTCGCGTGAT
841 AGTACGCCCC AATCACGATC AGCACAAAGC CGGTCGAAAG CTGGCGCTGG TAGCTGCTGA
901 AGAACACCAT CGTCAGTGCG ATCAGCTGCA GCGTCCACTG GATGACGCGC TTGCTACGGC
961 GATCCTTCGG TGGGCCAAGC CGATAGCACA CGAAGAAACT GATCGAACCA ACGATCGCCA
1021 AATACCAAAA CACGTAGTGC TGGTACAGCA CGAAGATTAG GCGCAAATTT TCGTACATCA
1081 TCTGCATGCC GTAGAAACCG AGCGTCCAAC CACTGACCAT AACGCCGAGC ATAAGGGGCC
1141 GATACGGCAT CATCTTGCTG AACATGTACA CCAGCGCAAG GGCGAACGAG GTTAATCCAA
1201 TAAGAATACC GCCGGTGTAG TAGAACAGTG GGTTTTGGCT CATGGGCAGG GCGATAAAGA
1261 ACAGCAGCAC GCCCAGCACG AGCAGTCCAA CGCGCCACAG ATCGAACCGG TTCAGCAGCA
1321 CCTCGATGTC GACTTTGCCG GACGAAACCA CGCCGAGACA GCTCTGGTTG AACGGTTCCA
1381 GTTCCACCTG CCGGCGCTTG CGGGACGCAA ACACATTGAA GCTGAACAGG CTCTGTTCCG
1441 CTTGTAGTG CTTTTTCACC TCCGCCGGTG AGCTACCGAG GTACTGGTTG TAGTTGTCAT
1501 GATCGCAGTG CATCCGTATC GAGACGGTGC AGAACGCGTT CAGCAAGCTT TCCTGCTGCC
1561 CCGGGTAGCA GTAAACGATC AGCCCAGGCC GGGTAATGCT CCACTCATCG TACGTGTACG
1621 ATACGAGGCG TCCCAGTTCG AGGAACATTA CTTTGGGAAG AAAGAAGAGA AGGATTTAAT
1681 AAAATTGAAA ACAAACCTGT AACATGACTC CTTCACTGCC ACTTACAATC TTTCTGCGTT
1741 TCCGCTTCCT TGCCATGGCA GAGGAATGGT AACAGACAGA CCAACAGCAG CACACCCGCC
1801 GCCACGGTGC GGTCAATCGT GATCATCGT GGGTATGCGC TTTGCTACCT GCGATTTTCT
1861 CCTCCTTGC ACCACCAAAC ACAACCAAG AAAAGTCCAC GAAATGGTTT ACTAAACAAT
1921 CCTCAGGACA AGCCAATTCT GGGTTTCACT TTCACCTACT GCAGTGCAAT TTAAACTAAC
1981 AAAACCGACT AAAAACCAAG TTTGGCCATC GTCGCGCTGA AAATGATGCC GACCGGTGAG
2041 GTAAGCGACA CAAACATGTT CTGGCGAGTG CAGCGCCACC GGTAACAAC GGAAAATAGC
2101 GGCTTTTTGT TGTGACAGCT GGCAGGGCGA CCAGAAAAAG GGGGTTATTT GTCATTAGAC
2161 CAGTCGCACA AGGTGTGTAG AGGGTTATTT TGACAGGTGG CTGAGTAAAA TTTGAATCTT
2221 TTGCCAATCA ACGGAATTTT GTTCTGTGAG ATGCTTTTTA TTCTAAAATG TAGCGAATTT
2281 TCATAATCGT ATTCAATTGT GTCTGCTTTT AGAAGGTAAG ACTTCT

```

//

```

LOCUS           42       2364 bp       DNA       linear PLN 25-FEB-2004
ACCESSION      42
VERSION        GeneMark.hmm v3.0 self_training
ORGANISM       A.gambiae
FEATURES
    CDS         CHR ---
                complement(500..1864)
                /translation="MFWGFCEALNFIQQYQKKLSADESLPELNLILFGSGDPRHIL
                ATASQLFLHPDLKVNIVYLAEGCIELLARHMVLLAVAFEDPELLSLKGKTHLFMDLFG
                NNLIRPFSSAYLSSKAKELTDIITDAEYAQRQAPMFNYETLRYKERDQLENVFRFWT
                NAPEHVFNIARYWEDRLRVQLGERYDHRNGAFDWDLQMRLRENGAKQVCPQEYKHW
                ETGIAFTFPEYEQSDPNKTFVAVGLVRNGKGF LHRG SVGDNMTGPYIAFGHKCAEERL
                SRSKHGVNDFRSTDVTERNVLQIVYEIQNRKPYCFDPKDIHQYGAHQLDTGKNLNKH
                EARTESAETHYNKPLLRNENLTIHFLSVEDVLRMHEMERFAGKFDVVVFVSNYLGL
                VKDGF SRAWKDNCLVCFETRQLTVFSKEEIKEHTDKIKAFQKESLAAVTNFSINKN
                HSVLLYKRAAGNK"

```

```

ORIGIN
1  CCCAAAGTTC TAACTTCCGT TCTGAGCCAG GCGAATACGG GAGGCGTCGA AAACACTATG
61 TACTTTACAC ACGACCACGC ACAATATGGA AAAGGTTCTG CTTGACTTTC CTCTACTTTT

```

```

121 CCCTCCCTTT TTCTAGCCTG CTCACACACG AAGGAGCACT GCTGGCGTTT TCCGGATTTCG
181 GCGACAAGGA CGCCACGGTC ACAGCGGCGA TCGCGAGCAA CATCTGGTCC GTTTACGAAA
241 AGAATGGCCG CAACGCATTC CGAGAAGATC GACTCCAGTA CGTGTCTCTG CAGTGTGAGA
301 ACGGTAACGT CGTCATTACG CAGGTGGCCA ACCTGCTGCT CTGTCTGTAC GCCCGGGACA
361 GTGTGGGGCT TGGCATACTG AAGGAAAAAG CGCAAGCCCT TGCCACCTAC CTGGAGGGAC
421 CGCTGAAAGA GATCGCTACA TCGTAGGAGG GCCAAACTTT TGTTATATTC ATATTTATTA
481 GAGCTTAATA CATTTGCGTT CACTTATTGC CGGCACGCTT GTATAAAAGG ACGGAATGAT
541 TTTTGTGGAT GGAAAAGTTT GTCACCGCTG CGAGGGATTG TTTCTGCGCG AAGGCCTTAA
601 TCTTGTGGT ATGTTCTTTA ATTTCTCTT TGCTGAATAC GGTCAGCTGA CGCGTTTCGA
661 AACACACGAG GCAGTTATCC TTCCAGGCGC GGCTAAAACC GTCCTTAACC AAGCCCAGAT
721 AGTTGCTTGC CACAAATACG ACATCGAACT TGCCAGCAAA CCGTCCATC TCGTATCATC
781 GCAAAACGTC CTCCACAGAA AGGAAGTGAA TGGTTAAATT TTCGCACCTC AATGAGAGTT
841 TGTTGTAATG TATGGCTTCC GCTGATTCGG TGCGTGCCCTC GTGTTTGTG AGATTTTTCC
901 CCGTATCGAG CTGGTGCACA CCGTACTGAT GGATGTCCTT CGGATCGAAG CAGTACGGCT
961 TCCGGTTTTG AATTTTCGTAC ACTATCTGCA GCACATTGCG CTCCGTCACA TCGGTGAGC
1021 GGAAATCGTT CACACCATGC TTGGAGCGGG AAAGCCTCTC CTCGGCACAC TTGTGCCCGA
1081 ACGCGATGTA CGGACCGGTC ATGTTATCAC CAACCGAACC ACGGTGCAGA AACCTTTTCC
1141 CGTTGCGCAC CAACCCGACG GCAAACGTTT TGTTGCGATC GCTCTGCTCG TACTCGGGAA
1201 AGGTGAAGGC GATTCCCGTC TCCCGCCAGT GCTTGTACTC CTGGGGACAC ACCTGCTTCG
1261 CACCGTTTTT CCGCAGTCGC ATCTGCAAT CCAATCGAA TGCACCGTTG CGATGATCGT
1321 ACCGCTCACC GAGCTGCACG CGCAACCGAT CCTCCAGTA GCGTGCATA TTGAACACGT
1381 GTTCCGGCGC ATTCGTCCAG AAGCGAAACA CGTTCTCGAG CTGGTCGCGC TCCTTGATC
1441 GTAGCGTTTC GTAATTGAAC ATCGGAGCTT GCGCGTGCAG GTACTCCGCG TCGGTGATGA
1501 TGTCGGTCAG CTCCTTCGCC TTGCTGCTCA AGTAGGCACT GCTGAACGGG CGGATGAGAT
1561 TGTTTCCAAA GAGGTCCATA AAGAGATGCG TTTTGCCTTT GAGTGAGAGC AGTTCGGAT
1621 CTTGAAAGC GACCGCAAGC AGCACCATAT GCCGTGCCAG CAGTTCGATG CATCCTTCCG
1681 CCAGATACAC GTTACTTTC AGGTGCGGAT GAAGGAACAG CTGCGATGCG GTCGCCAGGA
1741 TGTGTCGCGG GTCACCGCTT CCGAAAAGTA AAATGTTCAA GCTTTCCGGT AAAGACTCAT
1801 CGCTGATAA TTTCTTCTGG TATTGCTGGA TAAAATTAAG AGCTTCACAG AATCCCAAAA
1861 ACATCGTGAT GCACGTGAA ATGCACCGGT TGTACTGTGA GAGAGTACTG CTGCGCTAGT
1921 GTTGTGCAA ATAACAAGTC ACTCGCCGT TGCCATCGGA GACCCCGTTT CCATGGTAAC
1981 CGTCGAGCGC TTCTATGATT GGGTTTCGGT AGCATTGTG CTGTTTACA AAAAAAGAA
2041 AATGTTTCAA ATTTAAAAGA ATATATTTTT CTTCGCATTC TGCATAATA TAGTTGTGAA
2101 ATCAGATTCT GCATTGATCG TATAATATTT GCCCTAATTT TTAATTTTCA CGTGATGTTA
2161 AACAAAAAAA TAATCTCTCA TCGCTTCGAT TGCGTAGTTC TTACAAGCTA TTCAAACAAC
2221 GCGTCAGCAG TAAAAGTCG CAGTTAACGG TGCGCAGTAA ACATGTCTTG TGTGGTGGTG
2281 GTGGCAGTTG AAGGTAGCAC AGCTTTTGTAT TCGATATCGA TTGATTGTGA AGCGCGGAGC
2341 TTCGTTTTTA GCCTTCCATC TTGA

```

//

```

LOCUS          43      2400 bp      DNA      linear PLN 25-FEB-2004
ACCESSION     43
VERSION       GeneMark.hmm v3.0 self_training
ORGANISM      A.gambiae
FEATURES
    CDS                CHR ---
                    complement (500..1900)
                    /translation="MEAPPSVDDSIERKSTECGDGEKVEETQTKAASAATSQMPTES
                    GAGEKSDTPQPSGSEESKDSANGKATADHATSSSSSSSSSSSSSSKGVPPTSRTFDK
                    VPIFVVEDHHEVLTFLYRCLGSKHLPLQGNRIVHFDSDPDMCIPKHPANYVFNKDD
                    LLDSISIENWLMPTVFGHVERIVWIKPPWSEQIPKGKYAFHVGEFEGSIRTDSTLE
                    YFVSEGCYQPEDKLENRKRQLLEVCSVEEYPVAEDTDLAQGYILDIDLDFSTHNP
                    LKIYDRVQLYEKLKDFVSPELADDAENDLAKLQRVARDREKLEFLESIFLYLEEV
                    GNLKHFLVDYQQEISEEYAGLLEKVTVLVRTLKREYKEEIDWSMIYDAGCTCDVTD
                    LPHHESSREEIETMVQQLERFLEKVPVPPVITVSRSEDDYTPAGQVEMIQEMVLA
                    ALTKCLRAELDTPILYYKDQELNL"

```

ORIGIN

```

1   CGGGTCGGGA ATTGGGGGAA GCACTCTGAA ATGTCCCTTC TGTCCGAGTG TCCGGAAGAT
61  GCTTCGTGAT TGTTTTTTTA TTACTTTTAT TCCTATACAT TATCGAATAT TTAGCGAGCC
121 TTAAATGAAG GGATTTGTAT CCAATAATTA ACGAAAAATC GGTTATTTCT TCTCCCAGAA
181 AATGTATCAC ATGATTGTAG AAGGGTTGAC ACGTAGCTAC TGCTACAAAT GTATTTCATGC
241 TGCAAAGAAA ATGCTTTCCT TTTATCCTTA GAGACAATA GGCAGCTCTC TATGGGCTTC
301 TTTTACTGTA ATCTGACTAA GTCCGGTCTT GCACGAGTTA CCCTTTATCT ACATCCACAA
361 AATACGTCAT CATTATCCTC CCGTGAAATG AAAAAAAAAAC ACAACAAAAG TTTTCGTTTGT
421 TAACTTAAAT AGGGAGAAGG GGGCATTGGT GTGTATGGTG GTGGTGTTTT TTTGTTGTCTG
481 TTTTCTTTTA TTATTGTCCT TACAAATTA GTTCCTGATC CTTATAGTAC AGTATCGGGG
541 TGTCGAGCTC CGCCCGCAGG CACTTTGTAA GCGCTGCCAG CACCATCTCC TGTATCATCT
601 CCACCTGCCG GCGCGGTGTG TAGTCGTCTT CGCTCGATCG CGACACCGTG ATGACAGCCG
661 CCGGGCACGG CACCTTCTCC AGGAAGCGCT CAGCTGGCC GACCATCGTT TCGATCTCCT
721 CCCGGCTCGA CTCGTGGTGC GGCAGATCGG TCACGTCGCA CGTGCACCCG GCATCGTATA
781 TCATCGACCA GTCGATCTCC TCCTCCTTGT ACTCGCGCTT CAGCGTCCGC ACCAGGACCG
841 TCACTTTCTC CAGCAGCCCG GCGTACTCCT CGCTGATCTC CTGCTGGTAG TCCACCAGGA
901 AGTGTTCAGG GTTGCCACC TCCTCCAGGT ACAGGAAGAT CGACTCGAGA AACTCCAGCT
961 TCTCCTCCCG GTCGCGCGCC ACGCGCTGCA GCTTGGCGAG ATCGTTCTCC GCGTCGTCGG
1021 CCAGCTCGGG CGAGACGAAG ATGTCCTTCA GCTTCTCGTA CAGCTGCACC CGGTCGTAGA
1081 TCTTCAGGAA GGGATTGTGT GTGCTGAAGT AGTCCAGATC GATATCGAGG ATGTAGCCCT
1141 GGGCCAGGTC CGTGTCTCCT GCCACCGGGT ACTCTTCGAC CGAGCACACC TCCAGCTGGA
1201 GCGCCTTGCG GTTCTCCAGC TTGTCTCCCG GCTGGTAGCA ACCCTCCGAC ACGAAGTACT
1261 CCAGCGTCGA GTCCGTCCGG ATCGAGCCCT CGAACTCGCC CACATGGAAC GCGTACTTGC
1321 CTTTCGGGAT CTGCTCCGAC CACGGCGGCT TAATCCACAC GATGCGCTCC ACGTGCCCAG
1381 CGAACACGGT CGGCATCAGC CAGTTCTCGA TGCTGATGCT GTCCAGCAGG TCGTCTTGT
1441 TGAACACGTA GTTGGCGGGC ATGTGCTTCG GGATGCACAT GTCCGGGTGC GAGTCAAAGT
1501 GCACGATCCG GTTGCCCTGC AGGGGTAAAT GCTTCGAGCC GAGGCAGCGG TAAAGGAACG
1561 TGAGCACTTC GTGATGGTCC TCCACCACAA AGATCGGTAC TTTGTCGAAC GTTCTGCTCG
1621 TCGGCGGAAC ACCTTTGGAA GATGACGATG ATGATGATGA TGATGATGAG GAAGAGGATG
1681 TCGCGTGATC TGCGGTGCTT TTGCCGTTGG CGCTGTCTCT CGATTCTCC GACCCGCTCG
1741 GCTGCGGTGT GTCACTCTTT TCCCCCGCGC CGGATTCGGT TGGCATTGGT TGGTCTGCTG
1801 CGGAGGCTGC TTTTGTTTGT GTTTCTTCCA CTTTCTCCCC GTCGCATTCC GTCGACTTCC
1861 CCCGCTCGAT AGAGTCATCC ACACTCGGGG GAGCTTCCAT CGTGGTTGGT TGTGTATTCA
1921 ATCGTACAGA GTATAATCCG TAAAGAAAAT AATTCCACTT CACAACACCG CCACTGCGCC
1981 GCACACTCCG GGATCAAGGT AACCCTTAC CAGCAGCCAG ACATACAGAC GCACACACAC
2041 ACGCACGTAC ACACACACTC GGGGAAGGAG GGCCCACT GCTGCGGCTG CCAATCAATT
2101 TTCACTCATT AGCCCCTGCT AGAGCGAGCG CGAGCGGATA CTGCTACTAC CCGGGGACAA
2161 TCGCGCCGTC CACCAGGGCG TCCTGTATCG GTGCGCGTCC GTCCGCTGGC CCACGATTCC
2221 TTTCCGGGTG GCGTACCCTG AGTCCGGGGT GCGATGTGTG CGTGTGTGTA GAAAATAGTC
2281 ACGAACTTA TACGCGCTGG AGCTGCTCCA CACAATTGC GCTTGCTTCT TTTCCGGGGC
2341 CTACGCACGA TGACGGTTCA TTACGACACC CTTCTCAAAA TATACGCGCT CTCAACAAT
2401

```

//

```

LOCUS           44           2412 bp           DNA           linear PLN 25-FEB-2004
ACCESSION      44
VERSION        GeneMark.hmm v3.0 self_training
ORGANISM       A.gambiae
FEATURES
  CDS           CHR ---
                complement(500..1912)
                /translation="MDPADYRALHESQMENNNGTTAVNVFMHIAPPVFSVFHTVQLI
                AVASITHVPLRFLVEFCLIVLFPVLLVTVLHRLALNIALTLFVLSAISAVHQIRNRL
                HLMPFVQVPKSPQFLTCVRALVNLTTAVCILAVDFHCFPRELAKTETFYGLMDIG
                VGLYVFSNGIVYKVRPAEERLNTARVWKVLISTAPLLLLGFRFFLTNELDYQLHV
                SEYGVHWNFFITLACVKFAGTLTMDLVHDPEVIKFWAITLLCCHEMMLHLGVSRYVL
                SADTQRTTFFAANREGIVSLPGYLALFLASIIYIGWVVRPTEEITVAKKFLRRAGKVA
                IMAAVCWKMIYVCEDMFGISRRLANMGYCFWILAIGASVTALFMFFELFVYFVRFEE

```



PKSPDQIMKTDDFCIPYVPLVLQAINANGLFFFLIANLLTGLVNLVVFQTFLGNGAA  
LTIIGYYMFMLCVAVCFLYVNNVCLKIWI"

ORIGIN

1 GCTTCAGCTC GTTCTATTGA CGAAGCGAAA CGGTTTTTATC GTACTTAAAT GCCTTAAGCT  
61 TTACACAAAT GATGAGATTG GGTTGGATGG AGGTGGATCT GATGGCTTTA CGATTAATTA  
121 TACGCTCACG CAGTCTTAAC TTAACGACAA AAGGGGAATG TGAACAGTAT TTTTATGTC  
181 CAAAAAACC GCAGAATGTA ATATCAATTT ACCAATAACG AATGTGAGAT TAAGCTTAAC  
241 TTTAATACTA GATTGTTTTA TTTCTCATT GTTTTCAAGG CTTTTGATGA CGAGATGATG  
301 AGTTTTGTTTT CTTGCTGTCT CCCTTCCCCC GAATAGTGTT CAATATTATG TCCTAATGTA  
361 ATTTTTGCTT TAATTTTAGC TTGGTAAACC ACCCATCCTT TTTGCTTAAT TTACAACGAT  
421 GGCTTTTCGAT GACTAGAGAT CGATTTTGGG AACGGATCGG AGTGCCTGTT TGCACCTGGA  
481 ATTCAACGCC TTAGTGC GTT TACCATATCT TAAGCTTTAC ATTGTTAACG TACAGAAAGC  
541 AGACGGCCAC ACACAGCATA AACATGTAAT ACCCGATGAT CGTGAGGGCG GCTCCATTCC  
601 CTAGCAGAAA CGTTTGAAAC ACCAAATTCA CCAGCCCCGT AAGCAGATTG GCGATCAGAA  
661 AGAAGAACAG CCCATTGCGG TTGATTGCTT GCAGCACGAG CGGAACGTAC GGGATGCAGA  
721 AATCGTCCGT CTTTCATGATC TGGTCGGGCG ATTTTCGGCTC CTCGAACCGG ACGAAGTACA  
781 CGAACAGCTC GAAAAACATA AACAGCGCGG TGACGCTAGC CCCGATCGCC AGTATCCAGA  
841 AGCAGTAGCC CATGTTGGCG AGCCGGCGCG AAATCCCAA CATGTCCTCG CACACGTAGA  
901 TCATCTTCCA GCAGACCGCT GCCATGATGG CCACCTTGCC CGCCCGTCGG AGGAACTTTT  
961 TCGCAACCGT GATCTCCTCC GTCGGCCGCA CAACCCAGCC GATGTAGATG GAGGCGAGGA  
1021 AGAGGGCGAG ATAGCCGGGC AGGGACACAA TTCCTTCCCG ATTGGCGGGC AAGAAGGTAG  
1081 TTCGCTGGGT GTCCGCACTC AGCACGTACC GGGACACGCC CAGATGGAGC ATCATTTCGT  
1141 GGCAGCAGAG CAGCGTAATG GCGACGAACT TGATCACTTC CGGATCGTGC ACCAGATCCA  
1201 TGGTGAGCGT GCCGGCAAAC TTGACACAGG CGAGTGTGAT GAAGAAGTTC CAGTGCACCC  
1261 CGTACTCGGA CACGTGCAGC TGATAGTCCA GCTCGTTGGT GAGGAAGAAG CGGCCAAAGC  
1321 CGAGCAGTAG TAGGGGAGCC GTGCTGATTA GAACCTTCCA CACTCGTGCC GTATTAGTC  
1381 GTCGCTCCTC TGCAGGTCGC ACCTTGTAAG CGATCCCATT GCTGAACACG TACAGCCCCA  
1441 CTCCGATGTC CATCAGCCCG TAGCCGAAGG TTTCCGTTTT GGCAAGCTCG CGAGGGAAGC  
1501 AGTGGAATC GACCCAGT ATGCAGACGG CCGTTGTTAG GTTTACGAGC GCTCGCACAC  
1561 ACGTCAGGAA CTGCGGTGAC TTCCCGGGCA CCTGCACGAA CGGCATCAGG TGCAACCGGT  
1621 TCCGGATCTG ATGGACGGCC GATATCGCCG ACAGGACGAA CAGGGTGAGC GCGATGTTCA  
1681 GTGCAAGCCG GTGCAGTACG GTCACCAGCA GCACGAACGG CAGCACGATG AGACAAAATT  
1741 CCACCAGAAA TCGGAGCGGA ACGTGCGTAA TACTGGCCAC CGCAATGAGC TGAACCGTGT  
1801 GAAACACACT GAACACGGG GGTGCGATGT GCATGAACAC GTTCACGGCC GTCGTCCCCT  
1861 TGTTGTTTTT CATCTGGCTT TCGTGCAGGG CACGATAATC GGCTGGATCC ATCGTGTGTTG  
1921 GTGCCTTTTT TTTGTTTGA ATGATGTGAA GTATCCGTGC CGGAAAAGA GAGGAAGGAA  
1981 AAAAACCGAA TCGCGTACGC GTAATTTTGC AAACGACGAC GCGGATTAAG ACGTAAATAA  
2041 ATAACAAACA TCTGACAAAC GTCAAACCGC TTTCCGATTT GACGTTTGTA GATTGTGGCG  
2101 GGTTTTTGCT GCATGGGCAC CGCTTTTGCT TCGAAAGCTA CGAAACACGT GCGCAATGCG  
2161 TTGTTTACCT TTTTAAAATT CATTCTCTC ATTTATTATG AAATAAATTT CATTAGAGTA  
2221 TTCTTCTTAA ATTATTTATT TCCTTACACA CTACCAGTTC AGCTTAACCT AACAGAATCA  
2281 CGATGATGAT AAATGAGCAG TTATCAAGTC GCGCACATTT CGACATCGTT GCGCCCGAAA  
2341 AAATGCTTCT CCACCTACTC AAGGGCTCAA CCCTTGACCA CGGTTTTGTA CACGCCCTTG  
2401 CTGACCTTGA CC

//

LOCUS 45 2548 bp DNA linear PLN 25-FEB-2004  
ACCESSION 45  
VERSION GeneMark.hmm v3.0 self\_training  
ORGANISM A.gambiae  
FEATURES  
CDS join(500..1933,2013..2048)  
/translation="MAEEKFVLPSPRFQDEVKKGLDSFSRHLNPHFSTPNGMLLPSS  
KQPPPMFGPRGSTVPAQFLNNPRKRPASGPHRYPGPGTYRQNPQGGINQNRNNQGA  
GFKNKAGGPNHRSPRPPNNGLEKDVKPELLVLDWKLWCEGCDVNCRSEEEFEQHKAN  
HAPCTVPGCTFVGHMIMKRHRGRQVHSDGGCTKDTIGPSAEEIEQWKEERRKRYPTK

QNVILRQQAQEARFNRRGERIEEKKDRFPKRNAPVDDSSMNGPNTTPNGRNANRSKR  
 KRRAKKPAFVAPVEEKTLDRIPFKGTSSLKDYKDPPKNALSMLGDYGTDTTESSCDEE  
 EQASPVVAQKKSPEKSSVKEPTQKPERKLSEGEIEDDGDDAPSTSSAPAAQPVLAPN  
 ESQSKDAVMQSTTTASKSVDCAVPGSSSTVVKRPPKQONKPPRQNNFKDKRARNPN  
 RPLLDYSKLRNSQNTMLEKLLDADIRHERNVLLQCKKQMYQLYKSP "

ORIGIN

1 CTTTTCTTC GCCGGTTCGT CCGCTGGTTT CGTCGCGGGG TTTTCTTCGA TATCGGGCAT  
 61 TGCAAGATTA ATCACTTTTA TCACTCGTAC AGCTTAAAA CTGTGAAAA TACAGAAATT  
 121 TTCACCTTTT CACAGTAAAT TCACGCGTAA ACAAACCGAT TGCCGTCCTT TTCCTCGCGC  
 181 TTCTTCTTCC TCCAGTCACA AGTGCTGTCA GATAACTTTG ACAGAAAAATG TCATGATTTT  
 241 ACTCGATTTT ATCGGGAAAT TACCAGTAAA TTAGATGAAT AATTTGATTT CTGTGTGTTT  
 301 TTTAGGTCGA GTAATATTTT ACCGAAATGT GTATTACGCT AATTAATCA AAATGTAATT  
 361 TGTCTTATTT GCAAAAAAAA AGCAAAGGAA AGGATATTCG TTATCGCTAC TGGCAACACT  
 421 GCACGGCACG ACAGAACGCA GTTAATTTGT AAACAACCTT CGGTGCATGC AAGCAAAACG  
 481 TGCTCCGCCG TACATTGCGA TGGCTGAGGA AAAGTTTGTT TTACCATCGC CCAGGTTTCA  
 541 GGACGAGGTG AAAAAGGGTC TGGACAGCTT CAGTCGGCAT TTGAATCCAC ATTTCTCTAC  
 601 GCCCAATGGA ATGTTGCTAC CGAGTAGCAA ACAACCGCCT CCAATGTTTCG GACCACGTGG  
 661 TTCCACCGTT CCGGCCAGT TTCTGAACAA TCCGCGAAAA CGGCCAGCGT CCGGTCCGCA  
 721 CAGGTATCCC GGTCCGGGTA CCTATCGCCA GAACCAACCA GGGGGAATCA ACCAGAACCA  
 781 ACGAAACAAT CAGGGGGCAG GGTTCAAAA CAAAGCCGGA GGGCCAAACC ATCGATCACC  
 841 TCGACCACCG AACAATGGAC TGGAGAAGGA CGTGAAACCC GAAGTGTAG TTTTAGATTG  
 901 GAAGTTGTGG TGTGAAGGGT GCGACGTGAA CTGCCGATCA GAGGAAGAGT TCGAGCAACA  
 961 CAAGGCCAAC CATGCACCGT GCACCGTGCC CGGGTGTACG TTTGTCCGCC ATCCGATGAT  
 1021 CATGAAGCGA CACGGTCGAC AAGTGCACAG CGATGGCGGT TGTACGAAGG ACACCATCGG  
 1081 ACCGTCAGCG GAGGAGATAG AGCAGTGGA GGAGGAGCGC CGGAAACGGT ATCCCACGAA  
 1141 GCAGAACGTG ATCTTACGCC AGCAGGCACA GGAAGCTCGG TTTAATCGGG GTGAACGTAT  
 1201 CGAGGAAAAG AAGGACCGTT TTCCCAAGCG CAATGCGCCG GTGGATGACG ACTCTAGCAT  
 1261 GAATGCTCCA AACACGACAC CGAACGGACG GAATGCGAAT CGTTCAAAGC GCAAAAACG  
 1321 CGCAAAGAAA CCTGCCTTCG TCGCACCGGT AGAAGAAAA ACATTAGACA GAATACCATT  
 1381 CAAGGGCACT TCGTCGTTGA AGGATTATAA AGACCCACCC AAAAACGCAC TGTCATGCT  
 1441 GGGAGACTAT GGCACAGATA CAGAATCTTC CTGCGACGAA GAAGAGCAAG CAAGTCCGGT  
 1501 AGTTGCGCAA AAGAAGTCGC CAGAAAAATC GTCCGTCAAG GAACCCACTC AGAAGCCGGA  
 1561 ACGTAAACTC AGTGAGGGGG AAATTGAAGA CGATGGTGAC GATGCACCCA GCACAAGTTC  
 1621 GGCCCCAGCC GCTCAACCAG TGCTTGCTCC TAATGAATCA CAAAGCAAAG ATGCAGTAAT  
 1681 GCAGTCGACT ACCACAGCTT CAAAAAGTGT CGACTGCGCC GTTCCGGGTG GGAGCTCTTC  
 1741 AACCGTTGTG AAGCGTCCGC CCAAACAGCA GAACAAACCG CCACGACAAA ACAACTTCAA  
 1801 AGACAAACGG GCTAGGAACC CGAACAGACC ATTGTTAGAC TATTGGAAGC TCCGACGGTC  
 1861 CAATCAGAAT ACCATGTTGG AGAAGCTGCT CGATGCCGAC ATACGCCACG AGCGGAATGT  
 1921 GCTGCTGCAG TGCGTGAGGT ACGTTCTGGT GAACAAATTT TTCGGCATTG GACAGCCAAA  
 1981 AGAGGTGAAG GAATCCGTTG CAATTGTGAC AGAAGAAGCA AATGTACCAG TTGTACAAGT  
 2041 CACCGTAGAA ACAACTGCTC CAGTTGTAGC ATTGAACGAA GAAGCAAATC CTCCAGTTGT  
 2101 GACAATTACC GAAGAAGTAA ATGTACCAGT TGTTGCAGTA ACCGACGAAG CAAATGTTCT  
 2161 AGTTGTAGGA TTGAACGAAG AAACAAATTC TGCAGTTGAG GCAATCACCC AAAACGCGAA  
 2221 TACTCCAGCT GTAGCAGTGA CCTTAGAACC AATTGATCCA GTTGTAACAA TGACCGAAGA  
 2281 AGCAAATCCT TCAGTTGCAA CAATGACCGA AGAAAACGACT GCTCCAGTTG CAACAATGAC  
 2341 TGAAGAAACG ACTGCTCTTG TTTGCACAGT GACCGAAGAA ACGAATGATC CTGTTTCTAC  
 2401 AGTGACCGAA GAAGCAAAGG AATGAAATAA AAGTGTTTTA ATGCACACGA TTTATTGAGA  
 2461 AAATGTCTTA ATCTCTAGCA TCTATAGCAT AACTCCCGCC GTGCTCGATG ACGTGTCTG  
 2521 TCCGACACGA TTAATTTGCA TCCGGTTC

//

LOCUS 46 3316 bp DNA linear PLN 25-FEB-2004  
 ACCESSION 46  
 VERSION GeneMark.hmm v3.0 self\_training  
 ORGANISM A.gambiae  
 FEATURES CHR ---

CDS join(500..1826,1938..2086,2802..2816)  
 /translation="MQTSQQLSSGHRTANEDEDEDGESELLDLAIVGAGISGLMAA  
 KTISEKRADIRFRLFEEKSTHPGGTLDGLKTRWITPHHYHAMNLCRELQIPLGTVWRQ  
 SEVSEARRSLVSI GPFRKRPSGSQGANFSMSSLRDLLVRLESTRFMAELDCLCTVKY  
 IESNAQNMECFLQRKLLFEASRRFFRFLIKIGTGFYPSSELTVAACLRLFRSMSSVRD  
 LYDMLTLQNGHLQPASSPNWDVLIERLVARVGPPEHVTYSTNIVQVEITSEQRSDIVS  
 LTDGTGRRWRARFVILAVSCLDLVQISILPEGPLYFHQPDIQLGLWSMANFTVRYPA  
 PYWRDHGYTGSIFCPAQCLICYESGRNQLSGTYFSPLRGVLDNTERHLIRDITILRLL  
 RTNFACRTMQKPLEFGLELHPIPFYFDVFPFTFERCIIFSSTNVSCWYRGFINGSIQG  
 GVRAAILALLEIRPQTITFREVTDMQCMHFYFRQRSSYERVWYSLNLASLKV"

ORIGIN

|      |             |             |            |             |             |             |
|------|-------------|-------------|------------|-------------|-------------|-------------|
| 1    | TGAGAATGAA  | GTCAATAAAA  | CATGCACATA | CAATAATTCT  | TGTAAGACCT  | TGACGCCCAA  |
| 61   | AGTAGCTTAC  | ACAGGGTCTC  | TATACAACGC | CACTAGATAC  | TTAGTCCTTG  | CCACGGGAGA  |
| 121  | ACAATCCTAG  | TGGGAATAGC  | ACCCTGTACA | GCTTTCAAGA  | ATATGGGTGCG | TCATGCAACA  |
| 181  | TCCAAGGAT   | AGAACACATT  | TCAGCATAAA | TTGAATTCAA  | TTGAATTTGA  | AGAACTTCTA  |
| 241  | CCAATTATTC  | TGTCACACTT  | CCCTGAAGAA | TACCACATCA  | AACCAAGAAC  | AGACGCCACA  |
| 301  | TCAACGTCAA  | CGAACAGCTT  | GGCAACAGTT | TCAAACACGT  | GCCCAATCAA  | AGTAACCATA  |
| 361  | GACAACAGTG  | ACATTTTTGT  | TCTGCTTCCT | CCCCGCTGTC  | AGCTACATTA  | AATTCTTTCT  |
| 421  | GTACACAAAG  | TTTAGTTTCG  | CCGTTTTTTT | TTGTTATTGT  | TTTGCTATTG  | GTTCCGTTTCG |
| 481  | GTACAACAAA  | AGAAAAACA   | TGCAAACTTC | ACAGCAGCTA  | TCGTCCGGGC  | ACAGGACCGC  |
| 541  | GAACGAAGAC  | GAGGACGACG  | AGGACGGCGA | GTCCGAGCTG  | CTCGATCTGG  | CCATCGTCGG  |
| 601  | TGCGGGCATC  | TCGGGCCTGA  | TGGCGGCCAA | AACGATCAGC  | GAGAAGCGGG  | CGGACATACG  |
| 661  | CTTCCGATTG  | TTCGAAAAGT  | CCACCCATCC | GGGCGGCACG  | CTGGACGGGC  | TGAAAACGCG  |
| 721  | CTGGATAACA  | CCGCACCACT  | ACCACGCGAT | GAACCTCTGC  | CGGGAGCTGC  | AGATCCCGCT  |
| 781  | CGGCACGGTT  | TGGCGCCAGT  | CGGAAGTTAG | TGAAGCGCGA  | CGCTCCCTCG  | TTTCGATCGG  |
| 841  | TCCGTTTTCG  | AAGCGTCCCA  | GCGGCTCGCA | GGGAGCGAAC  | AGCTTCATGT  | CCTCCCTTCG  |
| 901  | CGACCTGCTG  | GTACGGCTGG  | AAAGTACCCG | GTTTTATGGCG | GAGCTGGACT  | GTCTCTGCAC  |
| 961  | GGTAAAGTAC  | ATCGAAAAGCA | ACGCCAGAA  | CATGGAATGC  | TTTCTGCAGA  | GAAAGTTGCT  |
| 1021 | CTTCGAAGCG  | TCGAGGCGAT  | TTTTTCGTTT | TCTCATCAAA  | ATCGGCACGG  | GCTTCTACCC  |
| 1081 | TCCCGAGCTG  | ACCGTGGCCG  | CCTGCCTGCG | GCTGTTCCGT  | TCGATGTCTG  | CGCTGCGCGA  |
| 1141 | TCTGTACGAC  | ATGCTTACGT  | TGCAGAACGG | CCACCTTCAG  | CCGGCCAGTT  | CGCCCAACTG  |
| 1201 | GGACGTACTG  | ATCGAACGGC  | TCGTGGCACG | CGTCGGCCCG  | GAGCATGTCA  | CCTACTCGAC  |
| 1261 | CAACATTGTA  | CAGGTGGAAA  | TTACCAGCGA | ACAGCGGTTCG | GACATCGTCT  | CGCTAACCGA  |
| 1321 | CGGGACCGGC  | CGGCGGTGGC  | GTGCGCGGTT | CGTCATTTTG  | GCCGTCTCCT  | GTCTCGATCT  |
| 1381 | GGTCCAGATT  | AGCATCCTGC  | CCGAGGGACC | GCTCTACTTC  | CACCAGCCCG  | ACATACAGCT  |
| 1441 | GGGCCTTTGG  | TCGATGGCCA  | ACTTTACCGT | GCGCTATCCG  | GCTCCGTAAT  | GGCGCGATCA  |
| 1501 | CGGCTACACC  | GGCAGCATAT  | TCTGCCCCGC | CCAGTGCCTA  | ATATGCTACG  | AATCGGGGCG  |
| 1561 | CAATCAATTA  | TCCGGCACCT  | ACTTTTCGCC | GCTCCGGGGC  | GTCCTGAACG  | ATACCGAGCG  |
| 1621 | GCATCTCATC  | CGCGACACGA  | TACTGCGCCT | GCTGCGCACG  | AACTTCGCTT  | GCCGCACGAT  |
| 1681 | GCAGAAGCCG  | CTGGAATTCG  | GCCTCGAACT | TCACCCGATA  | CCGTTCTACT  | TCGACGTGTT  |
| 1741 | TCCGACGTTT  | GAGCGGTGCA  | TCATCTTCTC | CTCGACCAAT  | GTTAGCTGCT  | GGTACCGGGG  |
| 1801 | GTTCATCAAC  | GGGTCGATCC  | AGGGCGGTAA | GTTTCGGGGA  | GTGTGTGGGT  | TTCGAGCATC  |
| 1861 | TACCCAACCT  | CCCATCAAAC  | GGGAGGGCAG | GAAGTTGTAA  | AGCTTTGGCT  | CATCATTACC  |
| 1921 | TACCCTTTGC  | TTTGCAGGCG  | TGCGGGCCGC | AATTTTGGCG  | CTGCTCGAGA  | TTCGACCGCA  |
| 1981 | AACCATCACC  | TTCCGGGAGG  | TGACCGATAT | GCAGTGTATG  | CACTTCAAGT  | ATTTCCGCCA  |
| 2041 | ACGGTCATCT  | TATGAGCGCG  | TCTGGTACTC | GTTGAACCTT  | GCGAGCGTGA  | GCCGGTTTTT  |
| 2101 | GCTGGGAGTC  | GGTGTGTCC   | TACTGACTTA | CGGCGTTTAT  | CGCGTGTGCT  | TGAAGGCTGA  |
| 2161 | CATTTGTTCC  | TGGTGGTCAA  | ATCGTTGACT | GTTTGTCTGT  | AATACAAAAT  | TAACTCCGTA  |
| 2221 | TCTGATTTTC  | GTATGATTTT  | GTGCTTTAAT | ACTTGTGTTT  | TTCGCTTTAA  | CACAAGACTA  |
| 2281 | GTACCGTATT  | TCTCAAGCAA  | TTATGTCATC | AGCATCTCAC  | TCCCCAACAG  | CAATTGTCAC  |
| 2341 | ATGTACACACA | ATCCCTCTCA  | CAAACAGCCT | TTCTGAGTGC  | CAAACAAAAA  | TGGGTCTGCT  |
| 2401 | CGCGGGCACT  | TTCAAACAAA  | TCGATTTCAA | CCGGTAAACG  | TTCAAACGAC  | AAAATTGAAA  |
| 2461 | CACTCGCTGC  | AAATTGAGCG  | AACGTTACAA | AGATACGGGG  | GGACCGTACC  | CTGTCAATCG  |
| 2521 | TAGCTGACAT  | ATTGGCAGCG  | TCAACCAGCG | TGGAAGACAG  | GAGAAGATGA  | AATGGAGTTT  |
| 2581 | TCCAGTTCCT  | GTTGCTTTCT  | TGCCCACCCC | GTAGCGTTAG  | TTGAGCACTC  | GCAATATTGT  |
| 2641 | TCTGCTCATC  | GATGAGGTTA  | GGTTAGGTGC | TGCACTAACT  | ATGGGAACAT  | GGCGGCTGGA  |
| 2701 | AAGCAAAGGG  | GTGTGCTAGG  | AAGCCTGCAA | AACGATTGGG  | TAATAGTTGC  | ACCGATTGCA  |

```

2761 GGGTGTCCATA GCGTTCCCGG GTCGCTCTGA TCACGGCGCA GCTGAAGGTG CCCTAATGAT
2821 AGCTTGATTG CGACTCCGTA GCAGGTCGGC CATAACCTCC GGTGCAAACG ATGCGCGTCA
2881 ATTGATGGGC GGTACCTGTA TGATGACTTT GCAGCCAATT TCACCTAATT ATGTCGTATC
2941 GGTTGGGCTG GATTTAAAGC TTCGGCGAGG AAGCGTTTTT GCACGGGGTC TTTAAAATCG
3001 ATTGAAAGCG ATTGATGCAT CAGTTGGGAG CATGTTAGGC ATTTTCAGATC ATGTTTGTGA
3061 TCGGTAAATA GGGTCTGTGC AAACATTTTC TGGCAATAGA ATTTTAAAGT CTAAGCGTTG
3121 ATACAATTCA AGTAAATTGA GTTTTTTTGT TGCTTAATTA GACATTCTCC GGAGGAACATA
3181 TCAAACAAAG TTACATTATT TTATACCGTT GTTACATCTA AAATCTTTAT TTTGTTCTGT
3241 TGAATTTAGT AAACATCTGA ACATACCTTT AATGTTAAAC CATAAACCAA ATTCACCAGT
3301 TATTTCTTGA AACTTA

```

//

```

LOCUS          47      2583 bp      DNA      linear PLN 25-FEB-2004
ACCESSION     47
VERSION       GeneMark.hmm v3.0 self_training
ORGANISM      A.gambiae
FEATURES
  CDS          CHR    ---
               complement (500..2083)
               /translation="MDNSSDITDKPAEAMEHKESPNAEENHPEGEQAKQPESSEGA
               ATSEQTNTPQEETKQPASNEPEEEDEAKLQEKLQTLKGDRIGETMYSERFVLSTILK
               LSKQGNRLLEDEEDEFQDLCNLWDMTIEPDVVRFLLEQEVIELFLALAADSEDFRLI
               EILFGIIGNMCCVEEMHELFFYRQSALLVTFCDFLSISDAPVLVQLMRTLTTLFDSD
               DERFHWFVGMKRVDNLTEKLALILATSTNRVLEHTAETVNAMINRFTEAEVDYAQL
               NEFYRLFASKLLEGLFEAFKQLYPLTGRETGTSAGFDEETLTLKDIKTMRRFLEI
               HEHFIVNANELYEAYVSEVDQCVHRVLCSEVSVLFPVTKNHICIFVSIISNIYSGI
               MYHFRAESFIYMKIYDQLAEALKNPPQQEEP SNAENNGTAMDEEDAADDGGFEFDV
               ETACAEVREAIFFLVGPIDEQIIRAAIRMGQLKESTFEQMCRELRETMDGEPPLLYQT
               CAKLMNAVRSTGAEESDIPMQQSNNEEQ"

```

```

ORIGIN
1  GTGCGTTTTT CCACCAGACC TGGGCGGCTC TGCTGCAGGC ACTGGAGCAG TCGGACAATT
61 TGGTAGATTA CAACGAGTAC AAGCGAAGGG ACTCGCTGCA GGAACAGTTG TGCCTTTCGC
121 TGGCGCATCT ATTGCGCCTG GCGACGAGGG AAGATGTGGT ATCGATGGCA ACGGTGCTAT
181 TACCGCTGTA CGATGCCGTA CGGGGGAACT GGGTGCCTGT GATAAGTCGC ATACTGCCGG
241 AAAAGAGTGC CGTGCTGTTG GAGTCCTACC GTGTGCTGAC GGAGTTGCGC AAGGGCAATG
301 CTGAAGGTGA ACCGGTGCCC GCATCGTCGT GGGATTTGCT GCTAAAATGT TTCAAAGATT
361 CGGACGTTTG TTAAGGGGAG AAGAGATCAA CTTTTTGAGA TGTTTTTCCA AATGGCAGTC
421 ATTACATTAT CGTTTTTTTA TAATCATTCT AAATGCGGCT TAAACATGTG TATTGATGTT
481 AGTTGCTTAA ATGTATCCTC TACTGTTCTT CATTGTTGGA TTGCTGCATT GGAATGTCGC
541 TTTCTCCGC GCCCGTCGAT CGGACCGCAT TCATCAGCTT GGCACAGGTT TGGTACAGCA
601 ACGGCTCCCC ATCCATCGTT TCTCGCAACT CCCGGCACAT CTGCTCAAAG GTGGACTCCT
661 TCAACTGCCC CATCCGTATG GCCGCCCGTA TGATTTGCTC GTCGATTGGA CCGACGAGGA
721 AAAAGATTGC CTCCCGTACC TCCGCGCAGG CCGTTTCCAC ATCAAACCTCT CCGCCATCGT
781 CTGCGGCGTC TTCCTCGTCC ATCGCCGTAC CGTTGTTCTC CGCCGCATTA GACGGCTCTT
841 CCTGTTGTGG TGGATTTTTT AGTGCCTCCG CCAGTTGGTC ATAGATTTTC ACCATGTAAA
901 TGAACGATTC CGCCCGAAG TGGTACATAA TGCCGCTGTA AATATTGCTG ATCGATACAA
961 AGATGCAGAT GTGATTCTTC GTAACCGGAA ACAGTACGCT TTCCTTCACG AACGAGCACA
1021 GCACCCGATG CACGCACTGG TCAACCTCGC TAACGTACGC TTCGTACAGT TCGTTCGCAT
1081 TCACGATAAA GTGCTCGTGA ATCTCGAGAA AGCGACGCAT CGTTTTAATA TCCTTCAGTG
1141 TTAATGTTTT CTCATCAAAC CCTGCCGAGG TGCCCTCGGT TTCGCGTCCA GTCAAGGGGT
1201 ACAACTGTTT GAACGCTTCG AACAGTCCCT CCAGCAGGCA GCTCTTTGCA AACAAACGAT
1261 AAAACTCGTT CAGTTGCGCA TAATCTACTT CCGCCTCGGT GAAACGGTTT ATCATTGCGT
1321 TCACCGTCTC GGCCGTATGC TCCAGCAGCA CTCGGTTCGT GCTGGTGGCC AGGATGAGGG
1381 CGAGCTTTTT CGTCAGATTG TCGACCCTTT TCATCACACC GAACAGTGG AACCGTTCAT
1441 CGTCCGACCG GTCGAAGAGG GTCGTTAGGG TGCGCATCAG CTGAACTAGC ACGGGCGCAT
1501 CGGATATGGA GAGAAAGTCA CAGAAGGTTA CCAGCAGGGC GGACTGGCGA TAGAACAGTT
1561 CGTGCATCTC CTCCACGCAA CACATGTTGC CGATGATGCC AAACAGGATC TCGATCAACC

```

```

1621 GGAAGTCCTC GGAATCGGCG GCAAGCGCAA GAAACAGTTC AATCACCTCC TGCTCCAGTA
1681 GAAAACGTAC CACGTCCGGT TCGATCGTCA TGTCCCACAG ATTGCACAGA TCCTGTTCAC
1741 ACTCTTCGTC CTCTTCCAGC AGACGGTTGC CCTGCTTCGA GAGCTTCAGG ATGGTGCACA
1801 GGACGAACCG TTCCGAGTAC ATCGTCTCAC CGATCCGATC GCCTTTGAGG GTTTGCAGTT
1861 TTTCTGCAG CTTTCGTTCA TCCTCCTCTT CGGGCTCATT GCTGGCAGGT TGTTCGGTTT
1921 CCTCTTGAGG AGTATTTGTT TGTTTCGGAAG TGGCTGCACC TTCTGAGCTA CTTTCTGGTT
1981 GTTTTGCTTG TTCGCCTTCG GGGTGGTTCT CTTCTGCATT AGGAGATTCC TTATGCTCCA
2041 TGGCTTCTGC GGGTTTGTCC GTAATATCAC TGCTATTGTC CATTGCACTT ATAAATACTG
2101 TTATCTATGA AATATTCAAC TATTGGGGTG AAAATGAAGC AAAATTCGTT TGTATTATATT
2161 TTACCGGTAG AAGCTATTTT GGGACAATTG TTTACAGCGG TAAAAGAGCG TCGATCGAAG
2221 CACCGCCAGC TGGAGCTAAC ATGCTTTTCT CTTTTGACCA ACATACCGCG GTACCTCGCG
2281 TGAGAGCGAG AAGGCACGAG CCTTCTGCTG GCTGGGAGCT GTCAACGAAA TGGATTTTTTA
2341 GTACAACACA CACGCTGTCA CTTTGACAGC AGCCAGAAAA AAACGCGTGC AGACGTAAAC
2401 ACCACCGCAC AACAAAACCT CGTGTTCCTG TGTGGCCGGA CAAAAATCGT TTCCAGCTT
2461 TGTAGGTGAA TTTGTGGTTC AAAATGAGTG CGTTGGCACT GGACGAGGTG CCCGCTTTT
2521 CGCTGCACAA AGCCGAAGTA GATTACGACG ATGAGGGGAA CGGATTTCGT GGCAAGAAGG
2581 GCA

```

//

```

LOCUS          48      2667 bp      DNA      linear PLN 25-FEB-2004
ACCESSION     48
VERSION       GeneMark.hmm v3.0 self_training
ORGANISM      A.gambiae

```

```

FEATURES              CHR ---
CDS                   500..2167
                       /translation="MFDVRTVEAGACCEQERDSADGAMSMTARRRRRAFQRQACLLSV
                       LAAFSLGLALGVFVPLIGISQAASKGSIVADGSPEQEPQQPALQALHHPAHQMPHFP
                       TIDDIRSADDGPRGRYASVSFIAEEKLTGEGEDVLFHPKLEVDGFVERKLPSPAASI
                       VQQLAGSSKMAQAAVPERRESRASKFDDAEREDGEGVIRDGIYWGPSVERALPDGF
                       DQRQSESWARYLHEAEVERLEIGCGRMQNRLLVFRDGTRACARYRQNTDQIQGELFS
                       FYLGQLLNLTNLAPSAASIIDPEARLWAAATEELAGAQWKPTKPVVITKWIGNLEPA
                       GIPQPFRLERHLNRFDVRNITEGLDRPRDGVRRLLLDRLGPARDGPAATPATPSSS
                       TSTLPAQPPTPEVLERLVELAQWSDLIVFDYLIANLDRVNNLYNFQWNADIMAAPA
                       HNLARQTDSSLLVFLDNESGLLHG YRLLKKYEAYHGLLLDNLCV FRLSTVRALEALR
                       DASVGQRLNALFERTTTTAQIRDVLPPLPEKSVKILVDRIDRVLGQVQKRETFADR"

```

```

ORIGIN
1   CGTGTTCCTC AAGGAGGGTT CGTCGCTTGG TGATGTGGTT GTTGTGTCAG TGCCGTTTTT
61  TTTCCGTGCG CTGTTTCGCT  GCCCAGATT TGTGAGGGAG GAAGAAAGAG AGTTTATCGC
121 ACACAAATAA ATCAATTATT ATAAGCTCCA AACCGCAGT  GGAACGCGCA GTGAAAACAA
181 CGCAAAGAAG ATCGGCTGAA GCGAGCAAGT GAGTGTGTGT GTATGATGCG ATCGTGTGGG
241 TGAAAAATCG TGAACAAACC GAAAATTGCT GTTGCTGCAA GTGTTTTTAA AATGTTTACG
301 CCGTGTTAGC GATACGAAAA AGCATTAAAG TGTCCCGCAG TGTCTAGTAC ATAAACTCC
361 TAACGTGTGT GTACGAGTGT CTCTTGTGTA TGTGCCCTCT CGATCAACAG CGGAAAATCA
421 ATCACAAAAC TTAACCGAGC AGCAGCCAGA AAAACGTCCT CCCCCCGCA  ATCTGGTGTG
481 GTGTTGTGTC ACGTGGAAAA TGTTTGACGT GCGTACCGTC GAAGCGGGTG CCTGTTGTGA
541 ACAAGAGCGT GATAGTTCGG ACGGCACAAT GTCAATGACC GCGCGGCGAC GCGCGCCTT
601 CCAGCGGCAG GCCTGTCTGC TGAGCGTGTG GGCCGCGTTT TCGCTCGGCC TGGCGCTCGG
661 CGTGTTCGTC CCGCTGATCG GCATCTCGCA GGCCGCTCG  AAGGGTTCGA TCGTGGCGGA
721 CGGCAGTCCG GAGCAGGAGC CACAGCAGCC GCGCTTCATC ATCCCGCACA
781 CCAGATGCCA CACTTTCGCA CGATCGACGA CATTGCTCG  GCGGACGATG GACCGAGGGG
841 TCGGTACGCG TCCGTGTCGT TCATTGCGGA GGAGAAGCTG ACCGGCGAGG GCGAGGATGT
901 GCTCTTCCAC CCGAAGCTGG AGGTGGACGG GTTCGTGGAG CGAAAGCTTC CGTCGCCGGC
961 CGCCTCGATA GTGCAGCAAA TGTTGGCCGG CAGTTCGAAG ATGGCCCAGG CAGCGGTTCC
1021 GGAGCGGCGT GAGTCGCGGG CGAGTAAGTT TGACGATGCG GAGCGTGAAG ATGGCGAGGG
1081 CGTGATACGG GATGGCATCT ACTGGGGCCC GAGCGTGGAA CGAGCCCTGC CCGATGGCTT
1141 CGATCAGCGG CAGAGCGAAT CTTGGGCGCG ATATCTGCAC GAAGCGGAGG TGGAGCGGCT

```

```

1201 CGAGATCGGC TGTGGCCGTA TGCAGAACCG TTTGCTGGTG TTCCGGGACG GTACGAGGGC
1261 CTGCGCACGG TATCGGCAGA ACACGGACCA GATCCAGGGC GAGCTGTTCT CGTTCTATCT
1321 CGGCCAGCTG CTTAACCTGA CCAATCTTGC GCCGAGTGCG GCGTCCATCA TCGATCCCGA
1381 GGC CGCGACTA TGGGCTGCGG CAACGGAAGA GCTGGCCGGC GCCCAGTGGA AACCCACCAA
1441 ACCCGTCGTC ATCACCAAGT GGATCGGGAA CCTGGAGCCT GCCGGCATCC CGCAACCGTT
1501 CCGGCCGCTC GAGCGACATC TGAACCGATT CGACGTGCGC AACATCACCG AAGGGCTCGA
1561 TCGACCGCGG GATGGCGTGC GAAGGCTGCT GCTCGACCGG CTCGGCCCGG CCCGAGACGG
1621 CCCAGCGGCC ACTCCGGCCA CGCCATCGTC GAGCACGAGT ACGTCCCCG CGCAGCCTCC
1681 CACGCCCGAG GTGCTCGAGC GGCTGGTCGA GCTGGCCCAG TGGTCCGATC TGATCGTGTT
1741 CGACTACCTG ATCGCCAACC TGGACCGGGT CGTCAACAAC CTGTACAAC TCCAGTGGAA
1801 CGCGGACATG ATGGCGGCGC CGGCGCACAA CCTGGCCCGC CAGACCGACT CCTCGCTGCT
1861 CGTCTTTCTC GACAACGAGT CGGGCCTGCT GCACGGCTAC CGGTTGCTGA AGAAGTACGA
1921 AGCCTACCAC GGCCTGCTGC TCGACAACCT GTGCGTGTTT CGGCTGTCGA CCGTGCGGGC
1981 GCTCGAGGCG CTGCGCGACG CCAGCGTCGG CCAGCGACTG AACGCGCTGT TCGAGCGCAC
2041 GACGACGGCG CAGATACGGG ACGTGCTGCC GCCGCTGCCG GAAAAGTCCG TCAAGATTCT
2101 AGTCGACCGC ATCGACCGGG TGCTCGGGCA GGTGCAGAAG TGTCGGGAAA CGTTCGCCGA
2161 CCGATAGCCG CCGGGCCCGC CTGGTGCTGG AGGTGGAGTG GAAGCGGCCA GTCGGAGACA
2221 GGTGGGTGGG TGGGTGAGCG GCGCACGCGC CATAAGACTG TGAGTCCTTT GTGTGAGCGA
2281 TGGGAATTTA TTATTATTAT TATATTATTG CTAGTTTGCT AGTTGGTTGT TTTTTTTTTT
2341 ATTTTGCATT TCCATTTACG GACTGTAAAG GTAGTGGTAA GGTTAGCCCG TACAGTTAGG
2401 CTAGGGATGC AAGACTAATC GAGGAATGAT GATAGTAGAC AGCGAGATTG CGTGAGAGCG
2461 AGAATGAATG ATAATGCGTA TAGCTTAACA AAACAGGTAA AAGAAAAGAG TGA AAAACAG
2521 CAGGAAAGTA ACACAAACAG AACAATTCCA CTTACACAGA CCTACCACTA GTTTGAGGGT
2581 AACGCCAGAC CACAGTTTTG CTGCTCTTAA GGGGTTGATG CATAAAACAG AGCGATACAA
2641 GTAAACTATT TCCTCAAAA CTTCTTT

```

//

```

LOCUS          49      3354 bp      DNA      linear PLN 25-FEB-2004
ACCESSION     49
VERSION       GeneMark.hmm v3.0 self_training
ORGANISM      A.gambiae
FEATURES
  CDS          CHR ---
              complement(join(500..2100,2704..2854))
              /translation="MSAKTPSEETKAQTKASSGDMATDKRRVQDDDDASGEQCEAGS
              SSAAREDDTSKPPASKRTRKRCDDRNTELVSINGCFFDDEFRRERFKAAWQRRETSAGC
              NYELKQTPFQLAVLQNFLOEDAKRADATKRLEAEFSTVDWKRKQMDLYEFYQTDLLC
              SLERDYLQAFYTVLKEQMMPLVEELTG IKLTHVSASCSMYNAGDYLLVHDDLLSDRR
              IAYVFYLSPWDCHRRWQAKDGGALELFRADGNQLPVFPVTDKIYPQNNQLVLFVCE
              QSFHQVGEVTTFEYPRLTINGWFGPAAPLPAGGKGAHAGPQAPSI IIDTHYMSPRK
              IDAELGEWINDVYLVDEVKQNVQKKVEMFSEVSLEQFLLGPRFTALLESRLRTGANLE
              WRKGPAPHLRKYEVLNFKALPEANPLRALYDLFTSRTMFRLLYDYTEL DLYGRKAKT
              PKCAIELQRWERGCTVVLGDSSTYADSTLDITFYLNAQENVGVITYLVPPEGEGKEQE
              RQGSANQSDAPQASSSTTSPYTECYEDDPVLLTLLPKDNVLNVVYRAEGTTKFTKY
              VSHNTHLEKADGDGHAYTYILVCSYKE"

```

```

ORIGIN
1  AGAAAAAAAA CCGACTGTTT ACGTACAATT TTGTTTGAAT TTTTTCGCA ACTCGAATGA
61 TAGAATTTTCG CGCCGTTTCGG CCGACTGGCA GTACAGGCCC AACCGAAACG TCGCCTTTAT
121 TGGATCCTCA TTCAGGGCAC GAATTTTACA GTAGGGTAGG GAAACGCTGT AAAGAGCATT
181 GGTTAGTTAA GGGAAAATCA AGCGGTCCCG TTCAAACAGC CTGCTTACCG GTAGACTTCG
241 GTCGTTTTCC ACCACATTGG CACACCAATC ACGATGATTA TGACTATGAA AGCAATCGTG
301 GCGTAGATGT GGATGGCAGC TGCAAATAGA GTAGAAAACG GTAAATGGTT AGCATACATG
361 AACATAGTTT TAAAAATAAG TTTAAATTCA ATAAACAGTT CAATAAAAAA AACACATCAT
421 TGTTTCATCA TGTGCCATCG TTGTGCAATG TTTTTATTTG TAATTATTAT CTTTACGCAC
481 GATACGCTTG TCCCTTTTTT TACTCCTTGT AGCTGCACAC CAGTATGTAG GTGTACGCGT
541 GACCATCACC GTCCGCCTTT TCGAGATGCG TATTGTGCGA AACGTATTTG GTAAACTTGG
601 TCGTTCCTTC CGCCCGGTAC ACCACGTTCA GTACATTGTC CTTCGGCAGC AACGTTAGCA

```

```

661  GCACTGGATC ATCCTCATAG CATTCCGTGT ACGGCGAGGT GGTCGACGAT GACGACGCTT
721  GCGGCGCATC GCTTTGATTG GCCGATCCTT GCCGCTCCTG CTCCTTTCCC TCGCCCTCCG
781  GCACGAGATA CGTAATGACG CCGACATTTT CCTGCGCGTT CAGATAGAAG GTTATGTCCA
841  GCGTGCTGTC GCGGTACGTG GACGAATCGC CCAGCACCGT GTAGCAGCCC CGCTCCCAGC
901  GCTGCAGCTC GATGGCACAT TTGGGCGTTT TCGCCTTCCG CCCGTACAGG TCCAGCTCGG
961  TGTAGTCGTA CAGCAGCCGG AACATCGTTC TGCTCGTGAA CAGATCGTAC AACGCTCGCA
1021 ACGGATTGGC CTCGGGCAGT GCTTTAAAGT TCAGCACCTC GTACTTCCGC AAATGGGCCG
1081 GTCCCTTGAT TCTCCACTCA AGGTTCGCCC CGGTACGGAG ACTTTCCAGC AGTGCCGTAA
1141 ACCGGGGCCC GAGCAGAAAC TGTTCCAGCG ACACTTCCGA AAACATTTCC ACCTTCTTCT
1201 GCACGTTCTG CTTACCTCG TCCACGAGGT ACACGTCGTT GATCCACTCG CCCAGCTCGG
1261 CGTCGATTTT GCGCGGGCTC ATGTAGTGCG TATCGATAAT GATCGACGGA GCCTGCGGAC
1321 CCGCGTGCCT ACCCTTCCCG CCAGCCGGCA GTGGTGCTGC CGGCCCATGA AACCACCCGT
1381 TGATGGTTAA CCGCGGATAC TCGAAGGTGG TCACTTCGCC CACCTGATGG AACGATTGCT
1441 CACACACCCG GAACAGTACC AGCTGATTGT TCTGGGGGTA GATCTTGTCG GTCACCGGAA
1501 AAACGGGCAG CTGATTGCCG TCCGCCCGGA ACAGCTCCAG TGCGCCGCCA TCCTTCGCCT
1561 GCCACCGTCT GTGGCAGTCC CAGGGGCTAA GATAGAACAC GTACGCTATC CGCCGATCGG
1621 ACAGCAGGTC GTCGTGCACG AGCAGATAGT CGCCCGCGTT GTACATCGAG CAGGAGGCGG
1681 ACACATGCGT CAGCTTAATA CCGGTCAGCT CCTCCACCAG CGGCATCATC TGCTCCTTCA
1741 GCACCGTGTA GAACGCTTGC AGGTAGTCCC GCTCGAGGCT GCACAGATCG TCCGTCTGGT
1801 AGAACTCGTA CAGATCCATC TGCTTTCGCT TCCAGTCGAC GGTGCTGAAC TCCGCTCGA
1861 GCCGCTTCGT GCGTCCGCC CGCTTCGCAT CCTCCTGGAG GAAGTTTTGC AACACGGCCA
1921 GCTGAAACGG GGTCTGCTTG AGCTCGTAAT TGCAACCGGC GCTGGTTTCG CGCCGCTGCC
1981 ACGCCGCCTT GAACCGTTCG CGGAATTCGT CGTCGAAAAA GCATCCATTG ATTGAGACTA
2041 GCTCGGTGTT GCGGTGCTCG CATCGTTTGG TACGTTTGGG GCGGGGTGGC TTCGATGTGT
2101 CTGTAAAAAG CGGGGGAACA GAGAGAAAAA CGCGGAACGT CTACGTTAGA TCTCATACAA
2161 GCGCACTCTA TTTGTGATGG GAAGATGGAA TCGGAACGGG TTTTGTACAG TGTTTTGTGT
2221 AGGAGTCCAC ATAACAAAAC CAAAAAGGAA ACGAAAGAAA ATCACACTCA CCCATCATTT
2281 TTTATCCAGA GTCTGGCCCT CCCGACACGG CTTACGATTT TAAAAGCAAA ACCTGACTGT
2341 ACTGAAAATA TAAAACACTT TCCGGGACGC GCATCGCGTT TCGCGGGTTC GGTTCGTTAG
2401 AGCGCGGGTG GTTTCGGGAT TACTTGACAG AAAGTTAAAC CAAAAACCGA TCGTTTTCAAG
2461 TGCCTTCATC CGGGTAAAAA TGTTGGATAA ACGTGTGAGC ATGAAGCGAA AAGCGCATGG
2521 CATTTGGTTG TTCCCTCCGT TTGAGTGGAA AATCGCGCGC GCGTGTTCCT GTGTGTGTAC
2581 ATGTGCGCCG GGCACGCACA CACACCCTTT CGGATGCTTT TGGCCAATGG AACAGGGGAT
2641 AAAACACACA GCGCACGGAG GGAAATTGTA AGGTGAAAAT GTAATGAAAA AGTGGTGCTT
2701 TACCATCCTC GCGCGCTGCT GAAGAAGAAC CGGCTTCGCA TTGTTCTCCG GAGGCATCGT
2761 CGTCCTGCTG CACCCGCCGC TTGTCTGTGG CCATATCGCC GCTGCTCGCT TTGGTTTGTG
2821 CTTTTGTTTC TTCACTCGGC GTCTTCGCAC TCATGCTTAC AGTTTACTTG CAATCGTGCT
2881 GCAACTTGCA CATGCAGCTA CACTTTCCAA ACGGGACTAG AACTGCACCG CAGAGTTATC
2941 GGTAGACCAG CAACTCCACC TTGTTTTCTT GCGTGTGCGA AGCAAAGCAA AGCAAAAAAA
3001 AAATACAATG CATTAGCAGG CGTCAAACCG TCAAACCGAT GACAGTTCGT TTTAGTGATG
3061 GGCAAAACGG GCCTGCAACC GGATTTGGGT TGATCCGAAT CTAGCTGCTT TCGGATTCTGA
3121 ATCCGGATTA ACTCCGGAGT TAACGGGGGA GGAGCTAGTT GACCTAGTAT AATGTTTAGC
3181 CATTTTTTAA TTTCTTGGGT AAATTTAATT TAATACTAAT TATCCTTAGT AATTGCATAA
3241 CAAGTAACTT ATAACTACAT TTCCTAATCT GAATTCCTTT GTCTGCACTA TACAGTCTGC
3301 GAGCGTTTCT ACATACACCG AGAATGCAGC TGAGAAAATA ACTGACAGCA TGCT

```

//

```

LOCUS          50      3096 bp      DNA      linear PLN 25-FEB-2004
ACCESSION      50
VERSION        GeneMark.hmm v3.0 self_training
ORGANISM       A.gambiae
FEATURES
  CDS           CHR ---
                complement (50..2596)
                /translation="MEVYEFNKSFLTRLLETTNVLNNGGGSNIPASAIRSEWINFVEV
                AVEPTGWQALWKASRPVCEQLGVKYPLVVLGTVEQVLFDELKAVFLIEAILDDDDVHL
                PEEQCTVQLEELWPLREQNNPALNVNITADCIDKLRFFYQHLWMPWDTDTEDEQNWI

```

EKHLESRIRFCHDLKNKMTMSRQLSSHALALLAEARYVQRKREFIEQELSEEDGQEEE  
 EEDNDTSILKDSRSGELLQLNLRLNTIKNEINVLENPVWRSVFQKRVFGAGKSKGNS  
 AMAYIVTQAVPMDEQLTYLQSAKEMMDPKIAVKMCDLQHALDHCSPDSAIYLPPT  
 RQDIKFLEYLNSGGSFGRVSSASFVDDFEQACKLNPTIVSKNDDSVLLTIDGDFTL  
 NVRLDCSNVRTGVVIKKNIVFRNCCFTGDPTSSTKQGIVIFGNCTITFDRCLIKF  
 SSGIYSNHDCTINLIGSTISHCMTGLETLDQCQIVFRSASITHCSQYGVLLDFNED  
 VQDQKAAGDRSTSGSQVYADYNTIEREEFTFEGACEFRDQAKGNFVIRKGFSEFN  
 SSCFVDEDESQLHDAEDGLDESICNATNVSFNANYLEASKLSSTKHIEPVSSEERE  
 DRASDTGVSGSLSQSEEDLSTGYCEDSTQIVKDSEYSVREVKRSEQTSESDPEDGS  
 EYDDDDDDDEGDDQVIEIEDTIIID"

ORIGIN

1 ATGTTCCGGAG GATCAATACA CTTTCCAAAT ATCGAATAGT TCGAAGCGTT GCTGTAAAAA  
 61 TGGAATCTCT TTATTTATAA TTCTAGTGAA CCGATAAAAA GCAAATCGCA AAGATTATTT  
 121 TGTTTGTTC TTTGACAGCT AGCTTCCGTT GCATGTTTTG ACAGCGGCGG AAGAATTGGC  
 181 TGCGTGCGTA AAAATATAAT TTTGAACTGG CTGCGGTTAA CGGATTAATC CTCCATCGGT  
 241 TGAATGCCT GAAATGAAA AATAATAAAT AATTTAAAT AACGCATAAT TTCTAGAAAA  
 301 AAAAATGAAT CACACGAAAC AATCTAAAGA ATCGAAAAAA AAAAACAAAT ACAAACATA  
 361 ACCTAACAAAC AAACACTAGC TAAAATACAA TCCCAATCTC CAAGAGACTA CATTTTAACA  
 421 CTTGGTACAA GACAACGAGA CAAGCACAAG CAGCTTTATC TACATCAATT TCATAAACTA  
 481 ACCAGTCCTC GGTACTGCAT CAATCGATCT CAATGATCGT ATCCTCGATT TCTATAACCT  
 541 GATCATCCCC CTCATCGTCA TCATCATCAT CATCATCATA CTCCTCCGAT CCATCTCCG  
 601 GGTCGGATT ACTCGTTTGT TCCGACCGTT TCACTTCGCG CACAGAATAT TCGCTGTCTT  
 661 TCACTATCTG CGTGCTGTCT TCGCAGTAAC CCGTACTTAA ATCTTCCTCC GACTGGCTCA  
 721 ACGACCCAGA CACGCCCATA TCGCTGGCCG ATCGGTCCTC CCGCTCGCTC GACTCAACCG  
 781 ACGGTTTCGAT ATGCTTGGTA GAGGATAGCT TTGATGCTTC CAGATAATTG GCATTGAAAC  
 841 TTACATTCGT AGCATTGCAG ATCGATTCTG CCAGACCATC CTCCGCGTCA TGCAGCTGGC  
 901 TCTCATCCTC ATCGACAAAG CAGGAGCTGT TAAACCGTTC GCTGAACCCT TTCCGGATGA  
 961 CAAAATTGCC CTTGGCATT TCCCGAACT CGCACGCACC CTCGAACGTA AACTCTCCC  
 1021 GACTCGATCGT GTTGTAACTG GCGTACACT GTGACCCGCT CGTGCTTCGA TCACCCCTG  
 1081 CCTTCTGATC CTGCTGGACG TCTTCGTTAA AGTCTCGAG CAGCACGCCG TACTGTGAGC  
 1141 AGTGCGTTAT GCTCGCCGAT CGGAACACTA TTTGACACTG ATCGAGCGTC TCCAGCCCG  
 1201 TCATACAGTG GCTAATGGTG CTGCCGATCA GATTGATCGT ACAATCGTGA TTGCTGTAGA  
 1261 TGCCGGAAGA AAACCTCTTG ATCAGACACC GATCGAACGT GATCGTGCAG TTGCCGAAGA  
 1321 TGACGATGCC CTGCTTGGTG CTGGAGGTTG GGTGCCCCGT GAAGCAACAG TTGCCGAAGA  
 1381 CGATGTTGCC TTTCTTGATA ACCACCCCGG TGCGCACGTT CGAACAGTCG AGGCGGACGT  
 1441 TTTCCAGCGT AAAGTCCCG TCGATGGTCA GCAGCACACT GTCGTCGTTT TTCGACACGA  
 1501 TGGTAGGATT CAGCTTGAC GCTTGCTCAA AATCGTCAAC AAAGGAGGCG CTGCTAACAC  
 1561 CCCGGAACGA TCCGCCACTG TTCAGGACT CCAGGAACTT AATGTCCTGT CTGGTCCCG  
 1621 GTGGAAGATA GATCGCACTA TCCGGACTGC AGTGATCGAG CGCGTGCTGA AGAGAGTCG  
 1681 ACATTTTCAC CGCAATCTT GGATCCATCA TCTCTTAGC GCTCTGGAGG TAGGTCAGCT  
 1741 GTTCATCCAT CGGTACTGCC TGCGTTACGA TATACGCCAT TGCGGAGTTG CCCTTGCTCT  
 1801 TTCCCGCACC GAAGCGTACC TTCTCGAAGA CGCTGCGCCA GACGGGATT TCCAGCACGT  
 1861 TGATTTTATT CTTGATCGTA TTTAAGCGTA AGTTCAGCTG CAACAGCTCT CCCGACCGG  
 1921 TATCCTTCAG GATGGACGTA TCATTGTCTT CCTCTTCTC CTCCTGCCCA TCCTCTCGC  
 1981 TAAGCTCCTG CTCGATAAAC TCCCGCTTGC GCTGCACGTA CCGCGCTTCC GCGAGCAAGG  
 2041 CCAGCGCGTG GGAGGAAAGC TGCCGCGACA TGGTCTTGTT CTTAGATCG TGACAGAACC  
 2101 GGATGCGCGA TTCCAGATG TTTCTGATCC AGTTCTGCTC ATCCTCCGTA TCGGTGTCCC  
 2161 ACGGCATCCA GAGATGCTGG TAGAAAAACC GCAGCTTATC GATACAGTCG CCCGTAATGT  
 2221 TGACGTTTCA GCGGGGTTG TTCTGCTCGC GCAGCGCCA CAGCTCCTC AGCTGCACCG  
 2281 TACTGCTC CTCCGGCAGA TGCACATCAT CGTCCAGGAT GGCTTCGATG AGGAAGACGG  
 2341 CCTTACGCTC GTCGAACAGT ACCTGTTCCA CCGTGCCCAG CACGACGAGC GGGTACTTTA  
 2401 CGCCGAGCTG CTCGCATACC GGACGCGATG CTTTCCACAG CGCCTGCCAG CCGGTGCGCT  
 2461 CTACGGCCAC CTCCACGAAA TTGATCCATT CCGAGCGGAT GGCGGATGCG GGAATGTTGG  
 2521 AACC GCCACC GTTCAGCACG TTGGTCTGCT CGAGCAGACG GGTGAGGAAA CTTTTGTTAA  
 2581 ACTCGTACAC TTCCATCTTT GTGTTGTGAT CGAATGGGGC GGTGAAAAAT CGTTGGACGG  
 2641 TTGCAGAGAA TCGAAATTTT TGAAGCGTTC CAGCTGTCTA GTGAACGTGG GGATGTAAC  
 2701 GGACACAGGT TCGAATGACA GTGCGGTCAT TTTTGTGCTC GCCATGTTTT AACAGAAATG



```

2761 CTGTTTTGCT TGCTTATAAA TTAAATTTTT ATGGTTATTT TAACATTTTT AAAATATCAA
2821 AATCACTAGA TATGCAATTA ATTTGTTTTA TGTGGCATGA AAGAACAACA GGCATTGGGT
2881 TAGGAAGGTT TTTTGCAATC TTGATCAAGT CGATTGCTAG AATGAGCCAA ACTGGTTCAC
2941 TAAATGATAA ACCGACTCCA CACGACGCAC TATGGGCTTT CGGTGCTGGA CAAAATATGA
3001 ACAGTTGATT GCGTTTGTCA TGATAGTTGT CACTTTTTAT AAGAATCCCG GAGAGGCAGG
3061 ACCGCAGTCG GTGTCGTCGT AGTCGGTTCC TTGAAA

```

//

LOCUS 51 3358 bp DNA linear PLN 25-FEB-2004

ACCESSION 51

VERSION GeneMark.hmm v3.0 self\_training

ORGANISM A.gambiae

FEATURES CHR ---

CDS complement(join(500..2475,2568..2757,2841..2858))  
/translacion="MIIPKEVFCCAACRQKHEDGSHQEDAMLRKICYICNDRPFPPLR  
KDTKITPNLLIVHILKEHLPLECNRSDFQQINKCFTLCSSDAGKEGECYLESSGTI  
GHHALPTIEADNKENIAVEQPADDRAMP SRERRKSSLVPGDFQPFGEVDNKIDEVDE  
ALLTPLTKINLRWKRKSRQSFESMLSMTNNTSEVNASGLLRVDGGSGPRKLVRTTST  
PMYQWQLMPTGPKQPNEYSATMGQMSIHCSSGSDTDSRAEDLGASPPVPNELDKV  
RAIIRNRKAVATPLRQVMSKSIQRAIAQHTAGVGGVYSKMLQPGTQRKMSFNSTMS  
SGMNSMLASPTKDPLDLRTPTLKRLGSGRGGGGSATSAQSIQAQRMVRPGDPAQES  
VQLAQADAIPNANTTDGSEYYETHRDMESLHGSSALGVSRGVDSLRLKLSAESYPVT  
PKPGGGGTALKKVSSFQALQDLQLKGEQQSNSAQNDTLEDVWGTPCGGGIPGRSYSC  
SAAPRLGDTFKAYDASVEDAENDSGTDDVFYPVKGRPNIRQGKSDRDAFADSTSHES  
KVGKLDGMNATRSGGGGGKLWSIVSNVIRLASRSDVTQEEHSM DAPRATTGAVAGGG  
GILHRAASFADYLNRYTTTRSDGGISRTSSSGSDEYRIAHE SNGKKRRRVASTYARP  
YAPALTN DGPCAA AKVQQHSPVAKRKRIQSRQP IHLRHTSSES GSGSASGPGRYN  
"

ORIGIN

```

1 AAATGTCTAT TTTACGTTAC AGATTTAACG GCACGACTGT CCTGGATCAA TTGGGAAAAC
61 TTGGGCGTAC ATCCGGGCAG ACGTACCATC CTGACGTCGC TGGCACTCGG ATCGTCAGAG
121 AGTATGGGTG CGTGTGGACC GCCGCCACAT TTGATCTAGA TTGCAACCAC CGCACTCCTT
181 TAACGCGGCA CCATTTTTAA GTCTTCCGTT TTGTTTATTC TTTAAATATA AATACTAAAA
241 CTGCATCTAA TAACTATTTA TCAGCACTAG GCTTACACCT CCCTATTCAA ATAGGAATCA
301 GCTAGTTCTC TGTCGTACCC CATTTTAAAT GAGAATAAAA ATGAAAAACG CACTCTCGTC
361 GCCTATTATT GCTTAAAACA ATTCAAAAAT AATGTATTTT TTCGTTCCGG TTCCATTTAA
421 TGGCACAAAT GTTTGACAAT CTTCCCTAAA TATAAAGCAT ACAAAGAAA AAAATAATAT
481 CCAATCACAC TCCCGCACGC TAATTGTACC TTCCGGGGCC ACTAGCGCTT CCGCTGCCAC
541 CGCTTTCGCT GCTCGTATGG CGCAACCGAT GGATAGGCTG GCGGCTCTGG ATGCGCTTCC
601 GCTTTGCGAC CGGACTGTGC TGCTGTACCT TTGCGGCCGC ACACGGACCA TCATTCGTTA
661 GGGCCGGAGC GTACGGCCGC GCGTAGGTTG ACGCTACGCG ACGCCTCTTT TTGCCGTTCC
721 ATTCGTGCGC GATACGATAC TCGTCCGAGC CGGAGGAAGA CGTGCGCGAA ATTCCACCGT
781 CCGACCGGTT GGTGTACCGG TTTTAAAGAT AGTCCGCAA CGATGCGGCT CCGGTGTAGGA
841 TTCCACCACC GCCAGCCACC GCGCCAGTGG TGGCTCTTGG CGCATCCATC GAGTGTTCCT
901 CCTGCGTGAC GTCGCTGCGC GATGCCAAGC GAATGACGTT GGAAACGATC GACCAGAGTT
961 TTCCACCACC ACCACCGCTG CGAGTAGCAT TCATTCCATC CAGCTTTCCT ACTTTGCTCT
1021 CGTGTGATGT ACTGTCGGCG AACCGGTCAC GGTGCGTTTT GCCCTGTCTT ATGTTTGGTC
1081 GCCCTTTGAC CGGATAAAAC ACATCATCCG TGCCGGAATC GTTTTCCGCA TCCTCCACCG
1141 ACGCATCGTA CGCCTTAAAC GTGTGCGCGA GCCTAGGAGC GGCCGAACAG CTGTAACTAC
1201 GGCCAGGTAT ACCACCTCCG CACGGCGTTC CCCAGACGTC TTCCAGCGTG TCGTTCTGGG
1261 CACTGTTGCT CTGTTGCTCC CTTTTCAGCT GCAGATCCTG CAGCGCTTGG AATGAGCTCA
1321 CTTTCTTCAG TGCCGTTCCG CCGCCGCCCG GTTTCGGTGT CACCGGGTAG CTTTCTGCCG
1381 AGTGTAGCTT CCGCAGACTG TCTACCCCTC TCGACACTCC TAACGCGCTA CTCCCATGCA
1441 GTGATTCCAT ATCGCGATGT GTTTCGTAAT ACTCTGAACC GTCTGTGCTG TTCGCATTCCG
1501 GTATGGCATC GGCCTGTGCT AGCTGTACCG ACTCTTGAGC CGGATCACCT GGCCGTACCA
1561 TACGTTGCGC TTGAATGGAT TGAGCCGAAG TTGCGGAGCC GCCACCGCCA CGCCCACTAC

```

```

1621 CGAGGGCGCTT CAGTGTCCGGT GTGGTACGCA GATCCAGCGG ATCCTTCGTC GGTGACGCCA
1681 GCATACTGTT CATGCCGCTG CTCATCGTAG AGTTGAAGCT CATCTTACGT TGCGTGCCCG
1741 GCTGCAGCAT CTTTCGAGTAC ACGCCGCCCA CACCGGCCGT ATGCTGGGCG ATGGCACGCT
1801 GAATGCTTTT GGACATTACC TGCCGCAGCG GCGTGGCGAC CGCCTTCGAC CGGTTGCGTA
1861 TGATTGCCCC CACCTTGTCC AGCTCGTTCG GCACCGGGGG CGACGCGCCA AGATCTTCCG
1921 CCCGGCTGTC CGTGTCACTG CCGCTGCTGC AGTGTATGCT CGACATCTGC CCCATCGTCG
1981 CGGAGTACGA CTCGTTCGGT TGCTTCGGCC CCGTCGGCAT CAGCTGCCAC TGGTACATGG
2041 GCGTTGAGGT GGTGCGCACT AGCTTGCGCG GCCCGGACCC CCCATCCACG CGCAGCAACC
2101 CGGATGCGTT CACCTCCGAC GTGTTGTTCC TCATCGAGAG CATGCTTTCG AAGCTTTGAC
2161 GGCTCTTGCG CTTCCAGCGC AGATTAATCT TTGTCAGCGG CGTCAGCAGC GCTTCGTCCA
2221 CTTCTCTAT CTTGTTGTCC ACCTCGCCGA ACGGTTGAAA ATCGCCCGGC ACGAGACTGC
2281 TCTTTCTCCG TTCACGGGAC GGCATCGCCC GATCGTCTGC AGGTTGCTCA ACCGCAATGT
2341 TTTCCTTATT GTCTGCTTCA ATGGTGGGCA GCGCATGGTG ACCTATTGTG CCGCTGCTTT
2401 CGAGATAGCA TTCACCTTCC TTTCCCGCGT CACTCGAGCA GAGCGTGAAG CATTGTGTTAA
2461 TCTGCTGAAA GTCGGCTAAT GAATAGAAAA CCTGTCGCGC ACGGTTTGTG GTTAGTTTTG
2521 TTGCTAAGAT CAAATAGGAA TCTAATTAAA TGTTTTTACC TTCCTACATC GGTTGCATTC
2581 CAGGGGCAGA TGTTCTTTCA GTATGTGTAC GATGAGCAAA TTGTTTGGCG TGATTTTAGT
2641 GTCTTTCCGC AACGGGAATG GTCTGTGCTT GCAGATGTAG CAAATTTTGC GTAACATGGC
2701 GTCTTCCTGA TGGCTTCCAT CTTCATGCTT TTGCCGGCAC TTGGCACAGC AGAACACCTG
2761 CAGGCAGGTT CTACACTGCA CCTGATAACG AACATATTAT TGAATAATAG TGCAAACCTG
2821 CGCGCATCTC ACCAACTTAC CTCCTTAGGT ATAATCATCC TGTAGTTCAC TGTTTTCTCT
2881 ACTTCACTTC ATGTACTTTC GACTCGCTGG CGATGATGGC CGTACGCTTC CAAAAAGGAT
2941 GATGGTTGTC CTAGAAGATC AACACCACTA CTGTTACCCG ACCGCAGTGT CTCATCGACC
3001 CGCATCCGCA CGATTAGGTG TCTTAGTGCT ATTATTGTCC ACCGCCGGCA CAACAGCCAA
3061 CTGTGCGAGT CCGGCAGCAC CAACACCAGG AAGATTTGAC GTTCGCTGTT TTGAATTGGA
3121 CGATCGCCGC CCACCGGCGA GTTTCGCACG GAATCGAACC TCCGATCGAC GCTGGTTCAG
3181 CTTTGCCCGA ACCTCCTCCA CACTTTCGAG CTCCGGTGCG TACGAGAGGT GCAGTATACC
3241 GCCGTA AAAAG TTGCGTGC GT CCAGCAGCTT TTTTCGTTGT CGGGCCTTTT CTAGTTTGAC
3301 GAAACACGCA TGA AATACGT CCGTAAACGG TTCGGGCAGC AGCTCGTCCG AGCCTTCA

```

//

```

LOCUS          52      3201 bp      DNA      linear PLN 25-FEB-2004
ACCESSION     52
VERSION       GeneMark.hmm v3.0 self_training
ORGANISM      A.gambiae
FEATURES
  CDS          CHR ---
              500..2701
              /translation="MSGEVSEPIKKCSLILKNAKSDTEKFAALFMVTKLIK GKDCNQ
AGKRLLFESIGFDFLRKLLTSKDV PDDCPASVYQSVALSILSCFCDDQLATHQDML
DSIPVFMGIVSTCDDDEYDDNLI IINEAYHCLQSI SLYESGRLALRQHVDVITKMAQI
YTQRSFQIDEALTLIVTLVARFGANSWDNDPKLFHALLQRVSLDFETDHAERKFELA
EMISSLLFHCRRLVARTVQGEIWPECLYKGISDILKSKIGKAQRDPALKLANAVD
VLGIEWTLHDVENPKKFFLLLLQLAAIEVRMQMDNKSFNQCVQQADLITACFI ILEL
SINFMSTDQLDLQKDKQVYTGLKGAFSAVLGVLVKLANDTKKDRLOKTEKAFAYA
MVRVLTAWLAQETSAMKNQVSKVLPFLFKLANESFYESRDYRIAHKADNVDDHEQQP
PADILRVMLPAICHLVVEEEARQIFLKEKEEQVLYDCLLFHWSIAHYKKPPVPRER
LKRMEPDPEMTPQQLDDMKDSRTAIVSLCNILMNITVLEAKLVEESTLFAQLLRFI
FENLPELKDIPDNLVMHGH LAVLGLLLKQASKIKKNDFSICRYIQTTIRFLWDAY
NIDESNDPQALVSMQYKEHWFEIMELWFLGMQ TMSGI IKLIPWISFAIESGWAEG
IVETLRKVKIGTLPPNVK LAYEDFLSQLVDANPAVAPVLKKADALKVCRNHRMMDLG
KKLFGD"

```

```

ORIGIN
  1  CCGTGAGGGT TTCGTGAAGG TCTTCCTAGC AGCTGCACAG CGTGTGTTGC GTTATTGAAC
  61  AGCGGCCACC AGACAGAGCG CAGGTTGGGT GCCGGTGGTA GCACGAAAAG GGAGAGACAT
 121  TTTCCATCAG GATCGTGAGC AAATCTATTT TAACGATTTT CCGACTCTCT CGCAGAGAAC
 181  ACGGAGCACG CGGAGCGTAG AAATGAGCTG CACCACATTG CCGGTGCGAC TAGGAAAATA

```

241 GAGAATGGGT TTCCACCGGT CGTCATCCGA ATCAGTCGAG AAAACGTCTT GGGACGGTAC  
301 GGTTCCGATG GTGAACAGAA GTGCTACTAT TTGAGACACA TCTGTAACTA GCTGATTGTT  
361 GCTAGGCAAC CTATCATCTG CTTTGTGGTG CACGTGTGCT TGTACGTGAA ACAATTGTGT  
421 GCTGCGGCAG AAAACTGAAA ACAGTTCAAT TAAGTAACGC AAAGAAACCA CACGAAAAGT  
481 ATCCCAAGTC GCAACAAAAA TGTCAGGCGA AGTGAGTGAA CCCATTAAAA AATGCTCGTT  
541 GATATTGAAA AATGCCAAGA GTGACACGGA AAAGTTTGCC GCCCTGTTCA TGGTGACGAA  
601 ACTGATCAAG GGAAGGACT GCAACCAGGC CGGCAAACGG TTGCTGTTTCG AGTCGATCGG  
661 GTTCGACTTC TTGCGCAAGC TGCTCACTAG CAAAGACGTG CCGGATGATT GTCCCGCCTC  
721 GGTTTATCAG AGTGTGGCTC TTTTCGATTCT GAGCTGCTTC TGCGATGACG AGCAGCTCGC  
781 CACGCACCAG GACATGCTAG ACAGCATAAC CGTGTTTCATG GGGATCGTAT CGAGCTGCGA  
841 CGACGACGAG TACGACGACA ATCTGATCAT TATCAACGAG GCGTACCAT GTCTGCAGAG  
901 CATTTCGCTG TACGAAAGTG GCCGGTTGGC GCTGCGCCAG CATGATGTCA TCACGAAAAT  
961 GGCGCAGATC TACACGCAGC GCAGCTTCCA GATCGATGAA GCACTCACGC TAATCGTAAC  
1021 ACTGGTGCCT CGCTTTGGAG CGAACTCGTG GGACAACGAT CCGAAGTTGT TCCATGCGCT  
1081 GTTGCAGCGC GTTTCGCTCG ACTTTGAAAC CGACCACGCG GAGCGCAAGT TCGAGCTGGC  
1141 GGAGATGATC AGCTCGCTGC TGTTCCACTG TCGCCGAGAT CTGGTGGCCC GCACGGTGCA  
1201 GGGCGAAATC TGGCCCGAAT GCTTGTACAA GGGTATTAGC GATATTTTGA AAAGCAAAT  
1261 CGGCAAGGCA CAGCGCGATC CGGCCCTAAA GCTGGCAGCG AATGCGGTCG ACGTGCTCGG  
1321 CATCGAATGG ACGTTGCACG ATGTGGAGAA TCCGAAGAAG TTTTTCCTGC TGCTGCTACA  
1381 GCTGGCCGCA ATCGAGGTGC GCATGCAGAT GGACAACAAG AGCTTCAACC AGTGCGTACA  
1441 GCAAGCCGAT CTAATCACGG CCTGCTTCAT CATCCTAGAG CTGTGATCA ATTTTCATGTC  
1501 GACGGACCAG CTAGATCTCG ACCAAAAGGA TAAGCAGCAG GTATACACGG GCCTAAAGGG  
1561 TGCCTTTTCC GCGGTGCTTG GTGTGTTGGT AAAGTTGGCC AACGACACCA AGAAAGACCG  
1621 ACTGCAGAAG ACGGAAAAGG CGTTTGCCTA CGCGATGGTT CGCGTGCTTA CAGCCTGGTT  
1681 GGCGCAGGAA ACAAGTGCCA TGAAGAATCA GGTTCCTAAA GTGTTGCCTT TCCTGTTCAA  
1741 GCTGGCCAAC GAATCGTTTT ACGAGTCACG CGACTACCGC ATTGCTCACA AGGCCGACAA  
1801 TGTGGATGAT CACGAGCAGC AGCCACCGGC AGACATCTTG CGGGTGATGT TGCCCGCCAT  
1861 ATGCCATCTG GTGGTGGAGG AGGAAGCGCG CCAGATTTTC CTGAAGGAGA AGGAAGACGA  
1921 GGTGTTGTAC GATTGCCTGC TGTTCCTACTG GTCAATTGCG CACTACAAGA AACCCCGGT  
1981 GCCACGCGCC GAACGACTCA AGCGCATGAA GCAACCCGAC CCAGAGATGA CCCTCAACA  
2041 GCTGGACGAC ATGAAGGACT CGCGCACTGC GATCGTAAGC TTGTGCAACA TCCTGATGAA  
2101 CATCACCGTG CTGGAGGCCA AGCTGGTCTGA GGAGAGTACG CTGTTGCTC AGTTGCTGCG  
2161 GTTCATCTTT GAAAACCTTAC CGGAGCTGAA GGACATACCA GACAATCTGG TGATGCACGG  
2221 TCACCTGGCT GTGCTGGGAC TGCTCTTGCT GAAGCAGCAA GCGTCAAAGA TTAAGAAAAA  
2281 CGACTTCTCC ATCTGTCGGT ACATCCAGAC GACGATCCGG TTCCTGTGGG ATGCGTACAA  
2341 CATTGACGAG TCGAACGATC CGCAGGCGCT GGTGGTGTCTG ATGCAATACA AAGAACACTG  
2401 GTTCGAGATC ATGGAGCTGT GGTTCTTGGG CATGCAGACG ATGAGCGGCA TCATCAAGCT  
2461 GATTCCCTGG ATCTCTGAGT TTGCAATCGA GAGTGGCTGG GCCGAGGGAA TTGTAGAAAC  
2521 GTTGCGCAAG GTGAAGATTG GCACGCTGCC CCCGAACGTG AAGCTGGCGT ACGAAGACTT  
2581 CCTGTCCAG CTCGTCGATG CTAATCCGGC CGTAGCGCCC GTGCTCAAGA AGGCCGATGC  
2641 GCTGAAGGTG TGCCGTAATC ATCGGATGAT GGACCTGGGC AAGAAACTGT TCGGAGATTA  
2701 AAGCTAACGT GCGCAGTTTT TCTTTAATTT TACTCTTAA ATTCACCTGT TTCTTTGTCC  
2761 ATGCGTCATG TTGCCGGGCG GCATAGCTCC ATTTCTTATT ACATGTAATA CAATTTGCTG  
2821 CATTTTTGTG TCATCATACT CCATTTACTT AATCTCATCG CATGTTGGTT GTCGCGTTTCG  
2881 CTTATTGCGC CGTATGTTTC GTAATATTGA AAAAGAAAAA TACGAAAAAG TAAAAATGTA  
2941 ATGTACACGC TATATGTGCA GAATAAACGT GTTTTCTACG TATATGTATA ACTACACATC  
3001 GGGCTTTTAT AATTCATAAA TCTTCAAGCT AAAATCTTCT ATATGGAATA AACGTAGTTT  
3061 CACGCTCCAG AGTACAAGCT CGAAAAGAAA GGACCCCAA ATGAATGCC TACTTTTATT  
3121 TGCCCAATGT CTTGGACAAG AAAAACTTTA GCTAGAAACA CGGAGGAGAC GCGAATAGCA  
3181 GTTTTAGTAG CCGTGTTTAA C

//

LOCUS 53 3482 bp DNA linear PLN 25-FEB-2004  
ACCESSION 53  
VERSION GeneMark.hmm v3.0 self\_training  
ORGANISM A.gambiae

FEATURES

CDS

CHR ---  
 join(500..527,598..2259,2373..2830,2905..2982)  
 /translation="MWFLTNNKTQHVVYLVSHTPCHTVGRTGTDLIITGDDSI SRNH  
 ASLQPHKDV LKLDIGSRYGSYVNDNINKTVPI SKEHPTELKAGDVIRFGRCGSVWT  
 VGKASFRCLTSTLVMDDRLKAVLEKIGAEMLPLYTPGLTHLIMPTITVTTKFLQCMV  
 GQVPIVKPDYFHAIERDCIGKGKALPAVKEFVPSCTETYIRNEELIFHPNPARSTLF  
 RGKEFIFLNTAQYNQFEHIVKLAGGVCVSAQREKIAKSRFLKPNVVTVKLKSSGSSQ  
 SQSQSFDTLTSQYIASRGRMPDLEIGLAIMFCSTEKYCNP EYSFAFNVEECYSSAQ  
 GGETLANSTEQQTESTEAGKSASGPEINTIPETEPLTEQKSRAAAATKTPPVGKAVN  
 GSTRS IASFLVPAPVP IAAAPEERRKSKRMQEA EKSQQTNDDEHSSNP SKRPRRT  
 GSLVESVSYSPVDSKLTESERNEIHVPETQPTPDSAMSQALQARGFRAVNRDSMES  
 DSRAAAKDSAKTRRAANLHQKLDDEDMFNFD E IAPRKKPRMDKANEKPI TSTNTAEV  
 RQTVAVGDECFNNSNNSHKTNP SLATSDASITRALAGAQRNSKGSNDSRMDGYKEF  
 IKPVQP SAMGWLSS TMCGLKLTGGGGEDHSLDEINIKSEPLDETD DDPYGMQRDCKKW  
 IKSMENAFPVREVSMKLV AHRPMDVSGQEVSCVTADGGKNFKAFVKKRNYPVQQLVL  
 GTKSV CVRDDNQCA"

ORIGIN

|      |            |            |            |            |            |            |
|------|------------|------------|------------|------------|------------|------------|
| 1    | TCAGCTGGCC | GGAAATTGGT | AAAATGTTCA | CGAATATTTT | GCACTGCTGC | CTTCCAGCTT |
| 61   | GTTACTCCTT | TCGCCACCTC | ATGAAAAACA | CTGGCTTTTG | ACAGTTGTGA | ATTGCTCAAT |
| 121  | AGCAGATGCA | GGGTTTCGTG | CATCAAGTCC | ATCGGGAAAA | GAGAATAAGG | TGTTGCTTTG |
| 181  | TAATCATTAT | CTCAATTTAT | TTGTATTTTG | AGAAATTTCA | AGCTTATAAA | AATAAATTTT |
| 241  | TAATAAACCT | CACTCCAAAT | TGTCAAATTC | ATTTTTATTT | ATGATATTTT | TTATAGAAAC |
| 301  | TTATTCCACA | ACAAAGAGGC | GAAGACCCCT | GTGAATCGAT | TTTGAGCAAC | TTCCCGAAC  |
| 361  | TGTCATTTTA | AAGCGCAAAA | CAACAATATT | CATTTATTTT | CAGTTTTTTT | CCACGCTACA |
| 421  | GATAGCCTCA | ACCACGGCGA | GGTGGTTTTT | TTGTGCATCG | TCTGATTATA | TACAGTGTTT |
| 481  | TCCGTGGTAG | AAAGTGAAAA | TGTGGTTCCT | AACAAATAAT | AAAACACGTA | AGTGTACTTG |
| 541  | TACCCGTGCG | TGATCAAACG | TAAATGTATT | GATCGATCGC | TTGGTTTTCT | CTTCCAGAGC |
| 601  | ACGTATACTA | TCTTGTATCA | CATACCCCTT | GCCATACGGT | GGGCCGAACC | GGTACCGATC |
| 661  | TCATTATAAC | CGGCACGAT  | TCAATCAGCC | GCAACCATGC | CTCGTACAG  | CCCCACAAGG |
| 721  | ACGTCTGAA  | GCTCACCGAT | ATAGGATCCC | GGTATGGATC | GTACGTTAAC | GACAACATTA |
| 781  | ACAAAACAGT | CCCCATCTCC | AAGGAGCATC | CGACCGAGCT | GAAGGCTGGC | GATGTGATAC |
| 841  | GCTTTGGCCG | CTGTGGCAGT | GTCTGGACGG | TCGGCAAAGC | TAGCTTTCGG | TGTCTCACAT |
| 901  | CCACACTCGT | CATGGACGAT | CGGTTGAAAG | CGGTGCTGGA | GAAGATAGGC | GCCGAGATGC |
| 961  | TGCCCTGTGA | CACACCCGGT | CTGACGCATC | TCATAATGCC | GACCATCACC | GTCACCACCA |
| 1021 | AATTCCTGCA | GTGCATGGTC | GGCCAGGTGC | CGATCGTAAA | GCCTGACTAT | TTCCACGCAA |
| 1081 | TCGAGCGCGA | TTGCATCGGT | AAAGGGAAAG | CACTGCCGGC | GGTGAAAGAA | TTCGTTCCTT |
| 1141 | CCTGCACGGA | AACCTATATC | CGGAACGAAG | AGCTGATCTT | TCACCCTAAC | CCGGCCCGGA |
| 1201 | GCACACTTTT | CCGTGGGAAG | GAGTTTATCT | TTCTCAACAC | CGCACAGTAC | AATCAGTTTG |
| 1261 | AGCACATTGT | CAAGCTGGCC | GGTGGTGTGT | GCGTGAGTGC | GCAGCGGGAA | AAAATAGCCA |
| 1321 | AATCAGCCTT | TCTCAAACCG | AACGTGGTAA | CGGTGAAGCT | GAAATCATCC | GGCTCATCCC |
| 1381 | AATCGCAGTC | CCAGTCGTTT | GACACGCTGT | CCCAGTACAT | TGCGTCACGG | GGACGCCGCA |
| 1441 | TGGTGCCGGA | TCTGGAAATT | GGGCTAGCGA | TCATGTTCTG | CTCGACGGAA | AAGTACTGCA |
| 1501 | ATCCGGAGTA | CAGCTTCGCG | TTCAACGTCG | AGGAGTGCTA | CAGTTCGGCG | CAGGGCGGAG |
| 1561 | AAACGCTTGC | CAACAGCACG | GAGCAGCAAA | CGGAAAGCAC | AGAAGCGGGA | AAGAGTGCGA |
| 1621 | GCGGGCCCGA | AATAAACACC | ATCCCGGAAA | CGGAACCGCT | AACCGAACAG | AAGTCAAGAG |
| 1681 | CAGCTGCGGC | AACCAAAACG | CCCCCGTGG  | GTAAAGCTGT | TAACGGTTCT | ACACGTTCTA |
| 1741 | TCGCGTCCTT | TCTCGTTCGG | GCGCCGGTGC | CGATCGCTGC | TGCTCCCGAA | GAACGACGCA |
| 1801 | AATCGAAACG | AATGCAGGAG | GCAGAGAAAA | GCAAGCAGCA | AACGAATGAC | GACGATGAGC |
| 1861 | ACAGCAGCAA | TCCGTCCAAG | CGTCCCCGGC | GTAAGGTTTC | TCTAGTGGAA | AGCGTGAGCT |
| 1921 | ACTCGCCGCC | TGTGGATTTC | AAGCTTACAG | AATCGGAGCG | AAATGAGATA | CATGTGCCCG |
| 1981 | AAACGCAACC | GACACCCGAC | TCCGCGATGT | CGCAAGCTCT | GCAAGCACGT | GGCTTCCGTG |
| 2041 | CGGTAAACCG | AGATTCCATG | GAGTCGGATT | CGCGGGCGGC | CGCTAAGGAC | TCCGCCAAAA |
| 2101 | CTCGCCGTGC | CGCCAACCTT | CACCAGAAGC | TGGACGATGA | GGATATGTTT | AACTTCGATG |
| 2161 | AGATTGCTCC | AAGAAAGAAA | CCTCGCATGG | ACAAGGCAAA | CGAAAAGCCG | ATCACCAGCA |
| 2221 | CGAACACAGC | GGAAGTAAGG | CAGACGGTTG | CGGTTGGAGG | TAGTCGTAGC | CGACGGAACG |
| 2281 | CTCCGGCAAC | AGATCAAGAG | GATCTGTTTT | GCTTCGAAGA | AACTCCAAGC | ACCCAGCAGC |
| 2341 | GTCGTGCTGC | CGCTGCTGCT | AACCAACGCA | AGACGAATGC | TTCAACAACA | GTAATAATAG |

2401 CCATTCGAAA ACCAACCCAT CGTTGGCCAC ATCCGATGCG TCCATAACCC GCGCGCTGGC  
2461 CGGGGCACAG AATCGAAGCA AGGGAAGCAA CGATTTCGAGG ATGGATGGGT ACAAGGAATT  
2521 TATTAAACCA GTTCAACCAT CGGCGATGGG CTGGCTGTCTG TCGACGATGT GCGGCTTAAA  
2581 GCTGACCGGT GCGGGTGGTG AGGACCATTG GCTCGACGAA ATCAACATTA AATCGGAACC  
2641 GCTGGACGAA ACCGACGATC CGTACGGTAT GCAGCGGGAT TGCAAAAAGT GGATCAAAAAG  
2701 CATGGAGAAT GCGTTTTCCGG TGCGGGAGGT AAGCATGAAG CTGGTGGCAC ACCGTCCAAT  
2761 GGATGTCAGC GGCCAGGAGG TGTCGTGCGT TACGGCCGAT GGAGGCAAGA ATTTTAAAGC  
2821 ATTCGTAAAG GTAAGGATTG ATCGGGGTAC AGTGC GTTGC TTTAAAGCTA ACGTGTGTAA  
2881 TGCCTTCTTT TCTTTTACTT TCAGAAACGC AACTATCCGG TACAGCAGCT CGTTCTCGGC  
2941 ACGAAATCTG TTTGCGTGCG GGACGACAAC CAGTGTGCAT GAAATGTGCG AATGTTAATC  
3001 CCTTCTTTTA CATTTTATT CCAACTTTGT GGCCCTATTA AGACAGCAGG CCCTTTTCTT  
3061 CATTCTATTTA ATTACCAGTA ACGACTATA AATACCCAAA AAGATACAAA TTAACACAGT  
3121 GAAATGAAAT GAAATGAGTA GACCAAATGA ATATAGACCA GCAGACGGAT GCTGTAAGTT  
3181 TCTGCTTTAT TGAAAGCGAT ACACGATTCA CTCACGTGCC CTCTGTAACC AGCTGTAGAA  
3241 ACTGTTCTTT GAAGAACTTT ACAAACCTCCA CAGATGAAAG TCGGTTGAAT TCCTTCATCA  
3301 AGCGTACATT GAAATCACCA AACTGCTGCT CCGAAAGCCC TTTTGTGAGC GCTTTCGCCG  
3361 GGCTGTGCGT GCGATTGCTT CGCTCCTGCT TCAGGAACTG CTGCACGTGG AACTTGGAGC  
3421 GTATGTGGTC GAGCTGTTTG GCATCGAATT GCGTCGCAGG TGCATTCCGT CCCTTCTCTT  
3481 CC

//

LOCUS 54 3627 bp DNA linear PLN 25-FEB-2004  
ACCESSION 54  
VERSION GeneMark.hmm v3.0 self\_training  
ORGANISM A.gambiae  
FEATURES  
CDS CHR ---  
complement (500..3127)

/translation="MNKLERLTQLLDESTVQSPSGLLRKSDSVRYLQQQAREEQRQL  
GASGLGESMMLDSVQDVGLYRTVGELEPAGGGLSGSQLSLVAGSTVSYTNANVREAS  
KQLCEEFLQVLQRYSNASDVFEATEELVKSLDDTLVQLNNAKQLLPTGRERRLHAE  
EMWLN AERDTWRLMICLYRDRLITQKQDSEMDDLPLVNSEQTIIISHLYGGNANLREY  
QIIIVDWLEQMALRQQQTELGHYMNRTVAWENTLHQLLEVGQTAFGSGRALVKGLDPD  
APIREKLPLHDLDMEDQTQLAKQVFRAIRQGRLEAQIKCENYQAWKAALLEGWRL  
HHDPNYDRENVSLAREPIEGNPRRDLWKKFAWQMAESRMLDPYTKATIGSLCGHLDS  
MVEVLSEHSWNDMLWAYLKAQIDIRVESEIRSHCVKSYLPMPDRYWNKGMSLEQIFD  
ALEAHKNARISLAAKDVKVIQKYIMLDDIPELMRTVDGWLEGTEVVLIPQMLRFLT  
HFVMFLRQIGKTFQEDIGDRVVKRYVEYLSLTLGSAHMVAFYTAALPPAMQLLLYSQF  
LQTI SDSQQRKQALEQAYNFGLDVPTITVYTVWEYRALEATEDELTPIASGRLELD  
EQKISSLEWLTFYDPDQRGELLWQSNTLIRYFLARRSIEAARKTFVAVIPADTMELIFT  
HYGSKDDIPCREEVSIREYLCYQTYLAAIQGYNDWCQLFYNGKPKPPAVKLSNFTE  
RVTSEHREATYRKELSNWELRVAELTNVTRDLLYNVLLFPEAGWLVDTDTTKPPDD  
DEDWLHRAVQ MENLRKLCIPEIVLLLHQLHTLTERYSENLLLADVLSSETRKLYSVF  
PKHKLAE TLIKIAESSLTLMNARKDPFVGDAAKK"

ORIGIN

1 CGCACACACT TTACCAATGG CTTACTTTAG CGGCACACGA TGAGAACACG ATAGAATAGC  
61 GCGGTGGACA ATTGTACTGA AGACGGCAGG CAGCAGCAGC AGCAGCAGAA GCAGAACCGA  
121 CACTGTTTTT CTTACCCGCA ATGTTTACGA ACTGGAGAAA TCCGGGTGGA GCGCGAGAGC  
181 TTCAACCCAA CTGTCAAAAT GATAAGCTCG CCCCAAGCAG GCCGCTTGCA CGCACACACT  
241 CGCAGCTGCT CCAGCCCTTG CTGAGCGTGT AGCCCATCTC GCTTTATCTT GCTCTTTCTT  
301 TCTCTTTCTT TCTCCCTTCG CTCGTTTTGG TTTCTTTCAC CGCAAGTGTG TTAGCCTTTT  
361 TGAATTTTGA ATTAATAAAA TCGCATTTTT ATCTTACACA TACTTTATCA CTTACGATTT  
421 TATTTAGAAC ACGGTAGGAA AATTAAGAAA TTAAGAAGT TAGTAAATGC AGAGCTAGCG  
481 TGGGAAAGAA TGTATGCCTC TACTTCTTCG CTGCATCGCC CACGAACGGG TCTTTCGGG  
541 CATTATGAG CGTGAGGGAC GATTCCGCTA TCTTGATCAG CGTTTCCGCC AGCTTGTGCT  
601 TGGGGAAGAC GCTGTACAGC TTGCGCGTTT CCGAGCTGAG CACATCAGCC AGCAGCAGAT  
661 TTTGCTGTGA CCGCTCGGTC AGCGTGTGGA GCTGGTGCAG CAGCAGCAGC ATTTCCGGTA

```

721 TGCACAGCTT GCGCAGGTTTCCATCTGTA CCGCCCAGGTCAGCCAGTCC TCGTCATCGT
781 CCGGCGGCGG TTTCGTCGTG TCCGTATCGA CCAGCCAGCC AGCCTCCGGG AAGAGCAGCA
841 CATTGTACAG CAGGTCGCGC GTCACGTTGG TCAGCTCGGC GACACGCAGC TCCCAGTTGC
901 TCAGCTCCTT CCGGTACGTT GCCTCCCAGG GCTCCGAGGT GACGCGCTCG GTAAAGTTCCG
961 ACAGCTTGAC TGCGGGCGGT GGCTTCGGCT TGCCGTTGTA AAACAGCTGA CACCAGTCGT
1021 TGTAGCCCTG GATCGCGGCC AGGTACGTCT GGTAGCAGAG GTACTCGCGT ATCGACACCT
1081 CCTCCCGGCA CGGGATATCA TCCTTCGAGC CGTAGTGCCT GAATATCAGC TCCATCGTGT
1141 CGGCCGGTAT GACGGCGAAC GTTTTGCGGG CCGCCTCGAT GCTGCGCCGG GCCAGGAAGT
1201 AGCGGATCAG TGTGTTTCGAC TGCCACAGCA GCTCGCCGCG CTGGTCCGGA TAGAAGGTGA
1261 GCCACTCGAG CGAGGAAATC TTCTGCTCGT CCAGCTCGGT CAACCTGCCC GAAGCGATCG
1321 GTGTCAAGTT GTCCTCGGTC GCTTCCAGCG CACGGTACCA CTCCACGGTG TACACGTAA
1381 TGGTCGGCAC GTCCAGCCCG AAGTTGTACG CCTGCTCCAG GGCCTGCTTG CGCTGTGGC
1441 TGTCGCTGAT CGTCTGAAGG AACTGCGAGT ACAGCAGCAG CTGCATGGCC GGTGGCAGGG
1501 CGGCCGTGTA GAACGCGACC ATGTGCGCGG AACCGAGCGT GCTCAGGTAC TCCACGTACC
1561 GCTTGACCAC CCGATCGCCT ATGTCCTCCT GGAAGGTTTT GCCAATCTGT CGAAAAACA
1621 TGACGAAATG CGTGAGGAAG CGTAGCATCT GCGGTATCAG CACCACCTCC GTGCCCTCCA
1681 GCCAACCGTC CACGGTGCAG ATCAGCTCGG GAATGTCATC CAGCATAATG TACTTCTGGA
1741 TCACCTTGTC CACATCCTTG GCGGCCAGAC TGATGCGCGC GTTCTTGTC GCCTCCAGTG
1801 CGTCGAAGAT TTGCTCCAGC GACATCTTGC CGTTCAGTA CCGGTCCGGC ATGGGCAGAT
1861 AGCTCTTGAC GCAGTGCAGC CGTATCTCGC TCTCCACGCG TATGTCTATC TGCGCCTTCA
1921 GGTACGCCCA CAGCATATCG TTCCACGAGT GCTCGGACAG CACCTCCACC ATCGAGTCCA
1981 GATGCCCGCA CAGCGATCCT ATCGTGGCCT TCGTGTACGG ATCCAGCATG CGGCTTCCG
2041 CCATCTGCCA CGCGAACTTT TTCCACAGAT CGCGCCTCGG ATTGCCCTCG ATCGGCTCGC
2101 GGGCCAGTGA CACGTTCTCG CGGTGCTAGT TCGGATCGTG ATGCAGCCGC CATCCCTCGA
2161 GCAGGGCCGC CTTCCACGCC TGCCCAGTAG TTTGCACTT GATCTGTGCC TCCTTCAACC
2221 GGCCCTGGCG AATGGCGCGA AACACCTGCT TGGCCAGCTG CGTCTGATCC TCCATGTCCA
2281 GATCGTGCAG GGGCAGCTTC TCGCGGATCG GTGCGTCCGG ATCGAGCCCC TTCACCAGTG
2341 CCCGCCACT GCCGAACGCC GTCTGGCCTA CCTCTAGCAG CTGGTGGAGC GTGTTTTCCC
2401 ACGCCACCT CCGGTTTCATG TAGTGGCCCA GCTCGGTCTG TTGCTCCGC AGCCCATCT
2461 GCTCCAGCCA GTCCACAATG ATCTGGTACT CGCGCAGATT CGCATTGCCA CCGTACAGAT
2521 GGGAGATGAT GGTCTGCTCA CTGTTACCA GCGGCAAATC GTCCATCTCG CTGTCCTGCT
2581 TCTGCGTTAT CAACCGATCG CCGTACAGGC AGATCATCAG CCGCCACGTA TCCCCTCCG
2641 CGTTCAGCCA CATCTCTTCC GCGTGCAGCC GCGGCTCCCG ACCAGTAGGT AGCAGCTGCT
2701 TGGACGCATT GTTCAGCTGT ACCAGCGTGT CGTCCAACGA TTTACCAGC TCCTCGGTG
2761 CCTCGAACAC GTCCGAGGCG TTGCTGTAGC GTTGAGCAC CTGCAGGAAC TCTTCGCACA
2821 ACTGCTTGCT CGCTTCCCGG ACGTTTGCAT TCGTGTAGCT TACCGTGCTG CCAGCGACCA
2881 AGCTAAGCTG ACTGCCGAC AGTCCGCCTC CGGCCGGTTC CAGTTCGCCC ACCGTTTCGAT
2941 ACAGGCCAC ATCCTGCACG GAATCCAGCA TCATACTTTC GCCCAGCCCG GACGCTCCCA
3001 GCTGTGCTG CTCCTCGCGG GCCTGCTGCT GCAAGTAGCG CACCGAATCC TTCGACCGCA
3061 GCAATCCGCT GGGCGATTGG ACAGTGGATT CGTCCAACAG CTGCAATGTG CGCTCGAGCT
3121 TGTTTCATCT GATGATGTGA CACCAGCGCC AAAATCCGCA ATCGTTTTTC TTTATCGCAT
3181 TCAATTCCTT CGCCTTGCCG CAACAACACC GAGCACCATA ACCTAAAACA CAGTCGAGCC
3241 ATTAATTCAT CATCGTTTTG CTGCACTTCC ACTCGTGTTA TATCTTTACT TACAGGAAA
3301 CTTCTCACGT AGAACGAGTA AAGTGTCTTT TATTTCAAAC TATTACAAA ATAAGCCTAA
3361 ATGGCTTAAT TTAGTGCAGC CAATGCAAAC GAAACCGGGA GATCGCCAAG CTAGCGCGCA
3421 AACCAATTGT CAACAAATCA AAACGAGCAT CTGTTTGACA GTTCTGCATG CTGGTCCGG
3481 CCCATTCAAC ATTTTTGGAA CAACAGATAT TTTGAACAAA AAAAAAACA AACCGATGCT
3541 AAAATATACA AAATTGCTGT TAAGCTTATA CAAAATTGT CATAATTATA TTTAACTTAC
3601 TTACTTTTAT CGAAAAACGC AACAATA

```

//

```

LOCUS      55      28648 bp      DNA      linear PLN 25-FEB-2004
ACCESSION      55
VERSION      GeneMark.hmm v3.0 self_training
ORGANISM      A.gambiae
FEATURES      CHR ---

```

CDS

join(500..512,1080..1219,8388..8506,9744..9819,17559..17789,24830..26933,27027..27519,28136..28148)

/translation="MVVVERVLENSYHGLIKENETFVEITPLIKVDETKICGFHIIK
KNKEIPFQIELVNELGILKAKKTLNCEKRKNYKFDITAVFCDGSHSKSASVHISVID
INEYSPTFLQPSYVTECACDRFRPSSSKGRSSIQMALTRFEREAEGAWNPOIFVIVT
ERQSASKSIGTAFPPQTPPHGQFSPNASKPPLRRRSQVDEGRLYQEIIIRVEATDKDCT
PLFGDVCKYEILTNDQPFTIDNEGSIRNTEPLSHKISHNHILSVVAYDCAMKQSAPV
MVNIRVRRVCEAHVMGVAERIDYVANSMESVSLFPKIHLELCDMQCKGEDMVIQSSV
SLKTKHISFGCDRDASQCLRRLSESGSGERERDGDGLVDLLQKNTDWTKDLTYDEGAE
AIFHFDGSSGAIVPKNVVQPQDFAAHQFSIVTMFRHNSIVSTDKHTKEHIVCSADDH
KMNRRHMHMFLFVRNCRLLILLRKFDFNDGDLNIFSPAEWWRWKIPQVCDNEWHHYTINVD
LPKVDLYIDGIRFESNVEDRHSNPEVIDDWWPLHAAHGINTTLAIGACYQGSENRLKH
GFSGDIAEIKLSTRKVLTAQIRCGTDCAEKLPPADHYLEPEQQIQSNTQMNKII I
EGSNTNIEQLLQQIQYINSKESPTIGRRNIQVMTTVSCPKNKAIRLPTIDTYIMVS
SAGSSLTGGSMLASATSSSSSSGLYNKILVDKPLATDQKPQIVISGNSNHLVSYDPI
KEGVKILAQINISVYTGKDIRPELQKLDSCNVNVFVPSLNPDEHEITIDDKDGADESL
FKFDIKTQISKEGVEMIGYDTIENYQHVLKSLVYINKKPAYYLNRFVFLKTCVQDDH
FRSAEYTLTLTVLHPKQOPTSSIASASAPSSNVLLAISTAPSEQHPAVAVDSDHNDAN
QYAHVMLHSHDVQESQSKVRSSGGAALLGHEKCLASSHSTMLIVVICGSFVLLICGVG
IARLRNSNAALAGGSSGHGAAGGAAGGSFAFARNLTDKHLPCPKVAPDQQLDWDSDSAL
TITINPMQHDALSDESSSDNSDSEDEEVLNGRYKNVSQLEWDNSTIASA"

ORIGIN

1 CTATTAGAAA ACTATTTCGA AATAGAATTG GAAATATTAC AACATTCCCG ATGTTTGTCC
61 ACAGGAACAT GACGCTTTGC GGATGAGTTT TGCCTCATTAAAGCTCTGC CCCTTTTCCG
121 TCCAGGAAC TCTTGACCAT GAACCGGTAT GGAATGAAGT CTGACGCCAA AATTAACGCT
181 CCTCCACACA CGCCACCCCA AAATGTTTGC CGCTTCCAAT TACATTGGGA AAATATTTGT
241 GTGGTGCCT AATGAATATC GATAGCCACC GCCGCCGAAC AGTGTGCCAA CATGCCAAC
301 TGTGTGCTACT TACTACAGCC GTGTTCCCG TGGGACAGTT TCCTGGGAAA AATGTAATAC
361 CCGTGATAAC AGCGCATTTG AAAATGCATG GTAGTTATCG AGAAAATTAT TCACTTCCAG
421 TGTACTTCCA GTGTGTTGGA ATGGCGGAAC TATCGCGCAG GAAATGAAAC CAATATCGAT
481 TGTACAGTAC CGAGCAAAAA TGGTGGTAGT CGGTCTGGGA GTCTAATGTT CTCAATTCCT
541 GGAGTTGCAA TGTGTGCAA ACTGCACCGG GCGCCTGTG CCGGAACGCG GGGCTTGGAG
601 CGCTTGTTCC GGCCGGAATG TAATACGCAC GGCAAAAGGA AACATCGTGC TTTCTCTGAT
661 GCGTGTCAAA CGATATTGAT GGAAAGCTCT GGCCTGGAA ATCAGAGCAA TGGGAAATGG
721 CGAACAGCAA ACATCCGTGT GCGCAGTAAT TTCGTGTTCC AAGGGCTTTA CTAATTGCAA
781 ACAGTACAAA TTATTAACAC GCCGATGCCG CATCATTACA GGTTGATGTT GGATTTGGGA
841 AATTAATAG TGTGTGTGTG TGTGTATATA TTGTATTTAT GTGGTTTTTG TGTACTCCTA
901 AACCTTGTC GGTATCTTTT CTGCTGCAA ATCATTTTAG GAGTTGGTAT CTACATCAAT
961 TTGTATCATT AAATTCCTTT ACTTTTAAAA CTCAAGCATA TCCCTGCTGA AATAATAATA
1021 AATACTCAAC TCTCTTGAC ATTTAACTTA TCTTTCCAAT CCCGTCTTTC TCTTTGCAGA
1081 ACGCGTCCTG GAAAATTCGT ACCACGGCTT GATAAAGGAA AATGAAACGT TCGTCGAGAT
1141 AACGCCACTG ATTAAGGTGG ACGAGACGAA AATCTGCGGC TTTCACATA TCAAAAAGAA
1201 CAAGGAAATT CCCTTTCAGG TAAGCTTCCA TTCGTTACTT CCATTTTGCT CCGTTGAATA
1261 ATGCATCGCA TAAGGAAGAA AACCAATTGT AGCTTGATTT GCTGGAAAA TCAATAATCT
1321 TCTGCTCGTA ACGCTACGAA ACGGCGTCAG ACGAGGCAA CCTCCCCCG TTTGTAAGAA
1381 GACTCAAGCG CGATTTCTTA TCGATAACGA AGTGGAAACA CTTGGGCTAT CGAGCATTAT
1441 TGGCAAAAGT GGCACGATTT GCAGAAAAAG TCGAGCGCGC CAGCGCGCAC GTGTCACCAT
1501 CTTGTGCATT TTTCGTCGCC AATTCCTACG TGCCCCAATG GGGGGCGGAC GGGGTGAAGC
1561 GCGACCGGGT TGCCATTTTC GCACATTGCG AAACGTCTCT TGTCCATGAA ATTGACTAA
1621 CTTCACTTTT AGCACGGTCA TATATCAACC CGGCGGTGGC GCGGGTTCGT CGTCTCGTGC
1681 CATCTCCGCG CGCCGAAATA GCCAATGTCC GTCCACGGCA CGGTGACAGA AATTGTTTCG
1741 CTAAAGTAAG GTGGAATCTG TCGGACATTT TTTCTTCTC CCACTGTACA CCTCCGTTGT
1801 CTGGGATGGG TTTTTTTTTA TAAACATAAC CACTTCTTTC TTGCGAGCGC TTCTAACAGA
1861 GAAGGTGGTC CACAGACCAT CGTCATTTTC AGCGCATTTT TTATGCCGTC AGCATCGTAA
1921 TCTGTTTTTA CTTTCTCTGT CGAGCGCTCT CTCTTTCTCT CTCCCTCTCT GTCTCTCTCT
1981 CTTTTTCGAG GAGTTCGAGG ATAACCTCTT GGGGACACGA GATAAGAAAC TTCATCCTTT

2041 TCATCTGCTC GAGAGCAGCC ACCGGTACCA TGCTGAGTTT CGGGTCTTTG GCGTCGCTTC  
2101 TTTGCCAACG TCCATCAAGG TCCATCAAGT ACGAAAAAAT CCTCCACCCC CGCTCCCCCA  
2161 CTGGTTTCGG CACACCAGCT TACCGTGCTC TTCTTTAAAC GGTATCGCAT TTACTIONGACAA  
2221 AATCCACTTG AAATTGCTGC TAAGCGCCCC GGAGGGATAA GGGCTGGCGA GCTTCCTTCC  
2281 TTCTGTTCCA CCGGTTTAGG GTGGGACTAA GGAGGAGGGG GATCTGTTTT ACTTTCATCA  
2341 CACTGTAGCC AAAATGTATG CAAACTTTCC CCCCTTAGCC TAAAGCACCG ATCCACCCGG  
2401 CACGAACGAA CCAAATTTGT CCACCACTAA CGATGGCCCC GGAAATGGGT GCGGAACTGG  
2461 GACGAAAAGG CGCTTTTTTT GCTGTATTTT TGGGAAGCGG TCGCTTTTTT TGTTAGGATC  
2521 TTCAAAATTG GATTCCCTGGT ACCGTACCTC GGGTGAGAGC ACCTCCCCCG GCGGTGACAT  
2581 TGCGTCGGCC GGTAAATTAGC GCAAATGATT ATTCCTTGAT GTCCACCATA ATGAGGAGCT  
2641 CCCACCGGAA TTTGTGTGTC TGTCTTTTCT TTTTTTTACA TTCTGCGTGT TTTACAACGC  
2701 ACAACATCTG TACGCCCTCA CCAAGAAGCG TAACCTGTGA AGGTCGCGCC ATTTTTTTTC  
2761 GTCGTTGTGT CGGTGTGAAA GCGTGTCCGA TGCTCTTAGG CAAAGGTGTG CACAGACTTC  
2821 CTTGCGCGCT TGTTTCCTGT ACCCAAGCAA GATATGGTAA GGGGAAAATA CTATACAACA  
2881 AGCGACGACT GTGCTGACAG CTAAGCCTCC ACGGCCTTCC CTGATCATA GCATAAGTGT  
2941 TGCTAGGCAT CCACGTGGCA CTGGCAGGGG GGATGTATTG TGGGCCGGCG AAGAAAGTCT  
3001 CTAGGGAGGT GTGAAGCTTT TCCCGGCAGC TTCCCGGTG ACGAATGGGA ACATCATGGG  
3061 TGGCTGCTAA GTTTGTATGAC GCAAAGGGAG GCAGCCGAAC GTCTCAAGTT TGCAACTTCG  
3121 GCTCTCTCAT TCTTCGCTCT TCCAGTGGGT AATTGTACCC CACACCCTCT GTGGTGTGGA  
3181 GTTTTCTCGT TTAAGAATTT TCACATTTCC AATTTCTAGA AGGTACAAGT TTAAGTCTGG  
3241 AGAGAGAAAT TTCGGTATAC AGGCGATTCT GTAACGTCAA CCATTAGCAT GGGAAACCTC  
3301 TTGAGATGAA ACGGACCTCT GTATGTGTGC TTCCGAAGCA AATCAATAAC GGAAAGCTGT  
3361 AAAGGGGAAG GGAAAAATAT TAAATTCATT CGTAAACAAG TGAAACTTTC TGCAGCGGAA  
3421 AGCAACTTTG CGGGGCACCA CTGGGGGCTG CGCTGTGCCA TTTAAATGTC AGCCCAAGTG  
3481 TGTTGTGTTG TGGGTGCTTT TATTAAAAGT TTAATTGGAA AACGAGGAAT GTTCAATTA  
3541 TTGACATTTT TTAGCTAACT CCCCTTGTC GGTGCGTGTG TGATGTAAGG AATTTGATAC  
3601 GCAACATTTT GGGGAAAAGG GCTGAAAGGC GAAGATGCC CAAGATGACG CTACGGTTCT  
3661 CAATCATTTA TGCCCTTTTC TCCGGTGAAG CTAACAGCAA AAAAAACAAG CGAACACGAT  
3721 CCACTTGTCC GTTCCATTGT CCTTTTCTCT CTCTCTCATT GCCCCGAAAC GTTCCGTCAC  
3781 GGGTCACGGC GAAGGATCGA AGTGTCCGAG CGTTTCTGAG GACTCATCAT CTCGACATT  
3841 TGCTTAGGCT GCATGAAAAA TTATCACCCA GCGCCCCGGG GTCGCAATTT GTATGTGTGT  
3901 CCGAGCGCGC GCGCGTTCTG CGTGCATAAG AACCCCCCCC CCCTCCCCCT TTTCTCCCCT  
3961 CGGACGATGC CGCAGTTGGC AGATAATTTA TTATCCATA CACAAAACGC CGGTTTGATG  
4021 GTTTGATGGT GAGCTGGTCC TCCGTGTGTC GTCAGTGGGT GCACGCAATG GGTGGCGGAG  
4081 AGAATCGGTG CCAAACCGAT TATGCACACT CCGGCAATAC CGCACACAAA CCGTTGCTAT  
4141 GCTATCAAGG GTAGTACGGT ATGCTGGATG TGCGCGATGC CTGGTGACGT CCTGTGGTCT  
4201 GCGGTGTGCC AAGCGCGATA TTGTGGGCGA TCTCGCAGCA ACCCTGGGAG CTCGCTGTGG  
4261 AGAATGGCGT GTTGGTGAAA CGTTATTGTG TGGTCTACCG ACAGGTTCCG CGTCAGGCTC  
4321 TGTGAGAATC TCTCCTTTCA TCTCATCCCA TTTCTCTCTC TCTCTCTCTC TCTCTCTCTC  
4381 TTCGCTCCCT TGAGCAGCCC ACAGGATCGT TAATTTAATG TCCGAAAAG GAGGCTCAGG  
4441 TTGATAGTAC AGGTGCTGCT GCACACGGTA GCGTCGGTAG CTCGCTGGTT GCTTGCTTTT  
4501 TCCCCCCCGG CAATAGAAAA TGGCATTGCG ACCCGACGTT CCTGGCACTC GAGCCCGGGT  
4561 ACACACAGTA GCAGATGTAT TATTGCATTT AAATGAACAA TTAACAAACC GCCCAAGCAC  
4621 GGAGCGTAGC GCTAGCAGTG CCTGTGCTGT TATTCAGTGC ACTTTCTTCA AGAGCACTCC  
4681 TTACCCGCAG CCGGTTGGCG GCGGCAAACG GTTTTGCCGC TTTGGCGACA CACGACAAAC  
4741 GATTATTGGG TGGCTCGCTT TCCACTGTTC ACGGCTCGCC GTTGTACACT TTGGCGAAAC  
4801 ACTTTAGCCT GCAAAACCCG TTTCTATCT TGCCCATTAG TGTTTTAAG GTTGCAATTC  
4861 GCTCGAACCT CAATTGTTTT TGTGGTGTTC TTAAGAAGAA CCCAAGCACA CGAGTGCCAT  
4921 TCTGCGTGGC GACGATAGCG ATGGGACGGA CACACACGTG TTATTCTAAA TTAGATTTTA  
4981 ATTTATTTTCG ATGGCATTTA CTTTCGCAAA GCCAAACAAC AGGGACACCC AGGGACAAAA  
5041 TGGAGTGGAG CTAAATTAAT ATCCATCACC TTTTTCAGGC TGCCAAGTCC AGGACAGGGG  
5101 TGGGTTTTTA AACCAGGGTC TCACACTAAA AGTGATGGGC TTATAGCATA TGGGTTTTTA  
5161 ACCTCCGGTG GCTGTTCCGC TGACACGTGT TCGCGCAAAT GTTTGATGAA AGTGGCAAAT  
5221 TATGCAAGCA ACAATTAATT AATTATACAT TCTGCTTGAC TTCTCGGACA ACGTGAAGGG  
5281 GCCGCGAGTT GTGAGGAGAT CTTGCGTGG AGAGAGAGAG CAAAATAAAA GCAAATATT  
5341 AATGCAACAT GTTCTGGAGC TGGAGTTCAT ATGCTGAATA TGTGTTGGAA TTGAATTTTT  
5401 GATACTCATG CTCCAAATAG CAAACAATC TCATGTTTGA GCCCAAAT ATCGTTTAA



5461 ACCTTTCCAA GTATTTTAAG CCACTCAATT TCATGTTTTC TAAAGTTTAG TTTCCCTCTT  
5521 GCTGTATGAG GGCATATCGC AAAGGGCGTT TGAATTAGTG TAAACGCCCT TGTTCCCTAT  
5581 CCTCCCTTCT ATTCTAGCAA TTTTAATTAC CTCCACACCA ATCCTTTGCT TTGCCCTTTG  
5641 CTATAACCGC CGCTTTGAGT CTATTTCCGT TTAGTTGTTT CAAAATTAATA TGAGGGCGTC  
5701 CCCCACCCC ATTTCGAGTCA AAACATTGGT GTGATTTGTT CCCTGCGCAA ATGCTCTTAC  
5761 TACGCTATGG ATCTATTGCT AGCAATGCTC AATCTGCCGG AGAAAGCCAT CGAACCCGCT  
5821 TTGATGACGT TTGACACAAG CAGCACATTG TGTTACAACG TGAAACACTC ATCTGCAGCA  
5881 TCCAGCAGCA CAAGGAAGGT GAACAACACG GAGCAGCTCC TCCACCCCTT GTACCTTTTC  
5941 CTAAGAAAAC ATTAAGCGT AACACAACAC GGGCTTCAGA CCCTCCGAGC AGAAGTTTTT  
6001 AATCTTCCC GAGTCCCCG TGTGCTTGC TGTAGAAGAT AGAATATCAA TTTATTTTTA  
6061 ATCGCCTTCG AATCACCGGT GCACCACCTG TCGTGACGTG AATCAAATAA CTAATAATGGA  
6121 TTTGTTTTCGA TGGCACCTTA GCGTTGGGAT GGGTGAAGGG AAGGAGGGGG GCTTTTGTG  
6181 TTGCGGGGGT CCCGATTTGG AAACATGCGT CGTTGGGGGG AAGAAAATCA AACCTGCAG  
6241 CGAGAAAACA ACTGCAACAT GGAGCATGGC AAGCGGCGTG CGGGGGGGGG GATAGAGAGG  
6301 TACACAGTAC GGTGCCGTGA CCAGGATTGC GTTCGGATTA GCATTTTGAT GAAGGAACGT  
6361 GAAATTCCCG TGAACGTTCT TGGGCGAGCG CGCGCGCGCG CGCCTTCGTG TCGTCAGCG  
6421 AGCGATACGT GTACGGTGAG TGGCCCCGGG ACGCCCATTT CTAAGCGCAT TCCATTCTTA  
6481 CACACACACG CCGGCAGCGC ACGGTGTTTT GAGATGACAG TTGAACGTTG GTGTTACAGT  
6541 TTTCCGGGACG ATATTACGGG GTTGCTGGCT GCGCTTTTCT GCAGAGAGTA AGAGAGAGAA  
6601 AGAGAGTGCG ATGGATGCAA TCGTGCCTTG AGGTTAAATT GGTGAAAGAT TGGAACGGGA  
6661 TTTACTGTGA GTCTATTTTC TCGCACAGAA CGTTGAAGAA TGCAGTTTTT AAAGCTAGCA  
6721 GTTAAGATTA GGATAGCAAT CTAGGGATAT TAATGATAGC AAATTATTTG ATTGTTATTC  
6781 AACTTCATAT TTCCATATCG CTTTTCTTTC GTCTTGTTCA ATCGAGCCAA CATGCAGTTT  
6841 GCGTAATTAT TGGTATACTT TATCCCATCT AGTAAAGCTA TTTAATTTAA TTGCATCTTT  
6901 TCCAGCCCGG TGGTTTTCGG TTGAATTACA TCCCTTCGCC AAATGCTCAC AGTTGCTACA  
6961 ATTCGAGAAG CAATTTTACT GAGCTTAATT AATTTATCAA ATTGCTCCCA GACCGTTACC  
7021 ATTTCCGGGG GAGCGAGTTA GTTAACCTCA CACAATATTT AGCATCGCCA CGCTTTCACG  
7081 GTCTGATCTA TACGCCCCAG GGCTTCGCAT TCCAATCCAG TTGGTGTCTGA TTGCAAGTTT  
7141 CAAAAGCTGA GTTTTTGTCAA CTTTTCGCAT AAATAAATGT CGAGACAACA TATCCCGCAC  
7201 ATGCTTTCGG GAGTTTTGTG CTGCCAGCAT AAAAAAGAGTA GTGCATAATT CTCTGTTGGC  
7261 AGTAGCTGTG AGCTATCGAA AATTCATTTT GTTTTTTTTT TATGTAACTC CGATCGCTTC  
7321 ATTTGCTTTC GCAGATTCGG TTGCCGGTGC CGAATTTTCGC AATTATGCAA AATTGTATCC  
7381 ACGCCACGCG TGTGCACTCT CTGCCACTGC TCAACAACGA TATCAGGCGT TATTTAAACG  
7441 ACTGTGCGCT TTATGCTCGC GCTGATGATT GGTTGGGTTA AGTTTTTTTT TTTGTTTTTT  
7501 TTGTCCTTCA CTCTTCGTTT GTTTTTGTAA TTCTTTCGCG CGTACTCTTC GCCCGCAAAC  
7561 GCTCACACAT TGGAGTGGAC TTTTGTGTTGA GCGGTAAAAT AAGCGTGGCC CATCCCCCT  
7621 TACGATAGTG GTGGAATTGG CCATCGAGCA TCGACTGAAC ATCCAACCAA ACTGAGCTGT  
7681 CCTTTTATGC TGCAGCCGTT CAGCGATTTT GATGGCCCGC GTGTACTAAC AAAAAATAAAA  
7741 CATTAAATAAC TGGGAGACGA CCGTGGCAGC ACAACACACT GCGGCTCATC GAGGAACAAA  
7801 AAAAAACGCA TATCTGCAAT TAACAGATGC AAGTCCGTTT GTGTTTTCCA CCCCACACTA  
7861 TCCCTGATGG GGCGAATGGG TCAGTAAAAA AAAGCGATGA AATGAATTTA TGATTGCCCG  
7921 TGGGTATTAC TTTTGTTCG CTCATCTGTT TTCCTTTCAC ATCGTAATGC CACCGATAAA  
7981 CACGTGGGAA AACAGGCGAT GCATCAATTT TACAATTACG CAAAGATGCA TGAGTGTTTG  
8041 CACAGCAGGA AAGGGTGTAT GTATGTGTGT GTGGGTGCTT TTTCCACTTA CTATTTAAAT  
8101 TTCAAACAAT CGAACGATGC CATTACAGCAG CGGCATCTAT CATTGTTTGT GTGCTGTTTT  
8161 GTTTGGTGT TCTGTGCAAT AATCAATATT TTTTGCAGAA CATAAATTTG TGATTCCACC  
8221 CATGGGGATA GGGAGGGAGG GAGGGAAGGT GACATAAGTA TTTCTCTGT TGCTGCGTTT  
8281 GTTAGCTATT ATTTATTGTT GGGTTGATTA TTTTCGATCG GTACGGTAGA AATTAATGTA  
8341 CGCGTGATTT AATGCTGTT ATTTGCTGTA TTGTATTCTC TTTTCAGATT GAGCTTGTGA  
8401 ACGAGCTTGG CATTCTGAAA GCGAAAAAGA CACTGAACTG CGAAAAGCGG AAAAACTACA  
8461 AATTTGACAT TACCGCCGTT TTCTGTGATG GATCACATTC GAAGAGGTAA GAGACAACAA  
8521 TTGTTCTATA ATTTATGGAA AAATAATGTT TTGATGTTTT ACGTAAACTA TCTCAATATA  
8581 ATGACGTTTT TAATTTTCAT TTTTCTCGAC ATGAAATAAT TTAATTGCCG TTGTTGCACT  
8641 TGTTGTTTTAT TCATTTTTGA AGCTATTTTG AAGCTGCTTG GCTAGATTTG CTTCTAAATT  
8701 CACTAGATAA TCTATTATGT TACAAGTACA TCATATTGCA TACCTTCTGG CGTTCAGCAG  
8761 GCACAGTGAA ACGGAGTAAA ATTAATAATC AAATTTTGCC TATTTTCGATT ACATTTTAAT  
8821 CTATTTTTTA CATTTTAATA TTTGCTCGAC CAAATCGCGT TTGATTAATA TAATATATAT

8881 AGGATAACAA GTCTTATTTT ATTACGAATC CAGCAACTCA ATTGATATGC CCCTATTAAT  
8941 CCCAAAAGCC CTACGAATTC CATAACTTTA GGCGCCAAA CTTGAAACTT GTTTTGTTTT  
9001 TATACATTCA ACCAAAATTG TTCAATTATT TCCGCCTAAC TTAAACATCT ATTTCGCCCG  
9061 TAACTAACGT GCCTTCAAGC CGAGCAACAA ACGTCGGCCT TAAATTGCTC AGCAGTTGTG  
9121 AAAAAATGTGT TCCATTAATA TGTTGCTAGC GCCTACTTTT CATGTCAGCA ATCACGGCAA  
9181 TAAATGCGCC GCAGAACGTA CCACCCGCC CCAAAAACAA GCGAGCGACA TACAAGCAAT  
9241 CGCGCATGTA GAGCTTGTTT TGTGCTGGTC CGTCCACCTT TTTGCTTCTT CTATTTACGT  
9301 TCGTACCAT CGTTCCACTT CGCACATTGC CAAGGCTTCT TCACTTCAAT CACTCCGCGG  
9361 AGACACCGAA CCGAAAGTTT ATCTGACAGG CGAAATATCG AAGCACTTTC TCCCCTCGCA  
9421 ATGTTTCGCG CTCGCAGATT CCTCGTCCAT TGCCTGAAC TTCCCAGGAA GCTTTGTAG  
9481 AAATTAATTG ATGCGTACGT CTGTGCTTAT CCTTCCACC AGCGAACAC ACGAAATTAT  
9541 TCGGCACTTT GGTATCTTTG GAGAAATTTT TCTCCTTGTT TCGAGTTAAA TCCACGGCAA  
9601 CCCATGCTGT CTTTTTTTGT TTTGTGTTG TTTTTTTGTT TTTTTTTTTT GGTTGGCAGG  
9661 ACTGATTACG ATTACGAATT TCTTATCCCA AAAACTTTTT TTTATCTCAC TCGCTTCTC  
9721 TCCAATTCTT CCTTCCGTTT CAGTGCAGC GTACATATCT CCGTGATTGA CATTAAATGAA  
9781 TATTGCCCA CATTCTGCA GCCCTCATA GTACAGAGG TAAGTTTTGC AAGTAATGAA  
9841 CTTTCCGTCC GGCTTCTCAC TTAGCAGCCC GAGTGCCTG GGCTCTGCCT TAGACTACTT  
9901 AGCAGCAGTG TTCGGCTGCA GTTATCAAAC ACATTATCC CGACCTTTGG GTGGTGTGTA  
9961 CTTTTGTCAA CCGGTGCGTC AATATCGGTG GCTCTGACAC GGCCCTACTG CACCCGGGCA  
10021 TCTCCAGCAT GTGCCAGTAA TTAGTGAATG CTTCTTTGCC GTCCCGTAG CCCGCGTTAT  
10081 GCGTCTTTGC CCTGCGAAAA CTCCAAAAGT CAGCAAACCT CCAATCCAAG CACATCGGTA  
10141 ATTTATTGCT CGCCAGCCC ATCCCGGAG AAAATGGTTT CGGACCGTAT GAGATTGGTT  
10201 TCGGTATGCG AAAGTGAAT AAGAGAGAGA GACCGACCGA CCGCCGAAA TAGAGCGCCA  
10261 GAAGAAGTTT CTTAATATTC ATCATCCATC TTCTGGTTT CGAATTAGTT CCACCTCAAC  
10321 CACCAGGCGT CTCCATGGGG GCGTTCACAT TTCCATCACT TTCACCGTTC GCACTCCGTT  
10381 GTAAGTTACC GATGGGGATG TCACAGTTAC TTTTGCCTT GAAGCAAATG AACATACACA  
10441 CACACAAAAG AAACAAATAA AAAGTGAAT GGAATGCCAC CCGAACCGGA CACGATCGTG  
10501 AATAGATGGC CCACACGATT CATGAATGTC TTTTTCATT TCTCTCTCTC TCGCTTTTCT  
10561 CGACCTCAC CGACGCCTCA TCAAATCAA TTTTCGGCAC CTTTAGTCCG GTTCGTTTTG  
10621 TGGTATTTGC TGCTCATCAC CCGGAAAGGT CTGCCCGTTG AGTATTTTGT TTCTCGTTTT  
10681 TTTTTGTGTC CTCTCGATTC TACCGAGGCG TAACTATACA CCAAAGCAAT TCTGCAAGCC  
10741 CCGCTGGCCG ATTTTACAG ACTCGTAATT AATTCAATGT ACTGGTATTG ATTTTTGCTC  
10801 CGTTACAAA AAACCGGACC CTACATTGAG CGACGTCGCC CACAAAGCAA AGCAAAGGTC  
10861 TTCTGACATC GCTTTTTTTG AAATAAAAAAT GCTCCTCCGA AACACTTCAA TTATTATTGA  
10921 ACACAGTGAC ACACACACAG ACACATTGAA CGCACGACTG CTTGCTTGTG TCGCATTGGG  
10981 GGACTGAATT ACGAATTTGA TGAACGCCCC GAACCGTGAC AACCTGGACT TGGAGGGTTT  
11041 CTGGGAAGAA AATAGCAACG ACAAAGAAG CAGAAATTAT GACCGGTACG AATTCCAGTG  
11101 CTTTTCTGGG TGTGCGAGAG AAAATCGATA CATTTTCAA GAAAGTTGAT AACACACTGA  
11161 AATGTCACAG CGAACAAAA CACATTCTTA GCTTCAGATG ATGCTTCGGA AGTGGTTGAT  
11221 CAAGATTGAT TTTTCGATCC CACTTTGTTT CGGCTTCACT TGCGCTTTCG CGTCGCATGA  
11281 AACGGCTGCG ATAATGAAGC GCGATTTTCC ACAATTAATA GCAACATTTA GCAAAAGAAA  
11341 AACATAACCA TGGAGGGAGT TAACCTCCAC CCCCCTTGA TAAACGCCAC GAGTGGTGAA  
11401 CCAAATTGAT AGCATTTAAT GTTTGATGAG CGTTAATGGT GAGGTTCCGT TTGCCACTTT  
11461 CACGCTATTC TATCCATTTG CGCGCTGTAT GCGATTCCGA ACCCGTGGGA GGAAGGAAGA  
11521 AAAAAACGTT CACTTTTAAAC CACTTTGAAA GGGTCATTAA CGGGGCGGCA GCGGCAGGAG  
11581 AAGATGGAGG TCAATATGAT GCAGCGGTAA AAAGCAATTA AAAAAGCACA AAAGCGTTTC  
11641 CATCCATCCA TCCATCGGGG GCGAAACCGC GCATTCTGCT AGGGACTGGT GCGCGTAGGC  
11701 GTTTACCAA CTTGCTTCACT CTCTCTCCGT TTGCTGCAAC ACTTTGACGA AGGATTTCAA  
11761 GTTGCTTAAT TCACGTCAGG ATGAGCTATG AAGTTTGACC AAAACAAAAA AGGCAGTTTG  
11821 GACACGGCAA AAGTTTCCCC GTTTAGCGAG TCATTATCCA TAAACAGTAA GTGAACTGAA  
11881 ACATCTGAAG TCGATGTCGA AGTCGCGCTG TCAGTTAAAT TGGATTGAAT GTCATTTAAT  
11941 CCCTCCAAA TGGCGGAAA AGTATTGCAA ACTTCCTGAA AACTAAGTTA CAAAATAATA  
12001 AAGGCCAGAT TTGATTGAAC CACCACAAA TGGGCTTTCC TAACAAGAAT AATGTCCAAA  
12061 CGAGCCACAG TAAATCACAA GGCATCAGCA TACTTGATC GCGTTTAGCC CAACCGCAGG  
12121 AGCTTAAATT ATCAACCAAG CACTTTTGTT ATCAATATCG CCCCTCTCTC TCTCTCTCTC  
12181 TGCTATGTAC AAACCAAAAG GCTCATCCGC GTGCAAACCTG CATCCTGCAA TATTTAACAC  
12241 ATACATGCAC ACATACTGCG GATGGATTGC GTGTGAATAG CGCTTCGGAA CAAAACAAA

12301 AAGGCTCGGA GTTTGAAAAC AACGGCACAG CAATCTAGCG ATCGGCCCCG ATAATCGATA  
12361 AGACAAATAC GTGCATCCAG GCATACGCAT ACAGACGACC GACCGCCTGT AGTTAAAAGA  
12421 GATGCACCAG CAAATGGCGT TGGCAGGGAA ATGGGACGGA CCCTCTGCTC TTTCCCTCTT  
12481 TCTGTGCCCC GCCCGTTCAT ACGCTGGCTT CCGTTTTGTG TGGCTAAGCT CCGGCTATTG  
12541 TTTCCGGCTT CCGGTCCCGA TATCATTCCG GTTTTGAATG CGCTTGCCTA TGTGTGTGTG  
12601 TGTGTGTGTG TGTGTGTGTT TGCAGGATGA GTGCATCCGC TTTTCGAATC GAAACTTTGC  
12661 CTGCAAAACC GTAGTGCACC GTAGTGCTTA CAACAAAAGT AATATTAATT TCGAAACAAC  
12721 ACCAACTCTG CTGCAGGTGA GTTAAGATAA AGTATGTGCG CCCGCGCCCT CATTTACGCG  
12781 ATACGTGTGG TGGAAAGCCT TCCTTTGTGT GTGCTTTTGC GTTTTGCACC GGCATAGCG  
12841 ATGGGGCGTG TGTGTATTAA AATAACGTTT GCTTGCAACG TAGTGTGAAC GTACACGGGG  
12901 CGCGCACTGA ACGTTCTGCA TCCCGTTTTT TTTGCAAAAT GAGGGAAAAG GTAGCAGAAA  
12961 ATACAGCGCC ACCTAGGCAA GGCTGGCAGG GAAAACAGCA GGAGCTAGTG CAGCAACTAA  
13021 CAACCAACGG CAGTAGCCCT GCTGCCCATG CATCATCGGT GGAAAGTTTC GCGCTTTTCC  
13081 GTATTCACGC TGGCGTGCAG ACACTGCCCT TCCTTCCCGA CGGTGTGCAC ACACAAACTT  
13141 TGCACGCGTT TGAGGTATTA ACGATTTCCCT GCCGTGTGCC GGTTGGTGTG TACGGTAGTA  
13201 GGGGTTTTTT TGTATCATTT ACGTGAGTAG TTTATGGAGC TTTTCCGATG TTTGGCCCCT  
13261 TTTATGCTAT AGGTAGATGC GGCAAAAAGT TTTTCGTAAG GTAAAAAATA AGAGACATGA  
13321 TATCTTTAGG CTCAAGTTTT TAAAGTAACA ACGGAAGTTT AGCAAAAAGCG GGTAACCTCGA  
13381 TCATTAGTAG ATGCATTGAA TAGGAAAAAC TGTTTTCTCA GAATAGGAAA GAAATCTCAG  
13441 AACTAGCAAT GAGAATACTT ACTTTTTTCT TAATTTGAAT CAGAATAGAA GATTGAGATC  
13501 AGAATTTTAA ACTCACTGTT TGAAGATTGA TAACTAGTAA TGCCTACAC AAAGCATCTT  
13561 TACATTTGCG CATTACTTCT TTTCTATCCA ACTCACTCAT CTACTTTCTG TGCCGATTAG  
13621 AGACTCACTC ATTGTGGATT CATATCACGC ACTCTTTTCC TGGCTGAATA GAGACCTCAT  
13681 TCCTCGGGAT TCAACTCACT CTCTCACTGC ACGGATTAAG CAGTAAGCGG TCGCGTGGAG  
13741 CCTCAAGGTC TCAAGGGGAG CCCGAGAAAA AGAATCTTCC TCAACTCACT AGTAAATTTG  
13801 CTTCTCAATC CTTCTCTGAT TTAGAATTCT TCATACAAC TTTTCGGTCTA CTCTTCAGAA  
13861 AAGCCTTCTC TCGTGTGACC GCTTAAAGCC TCCACTTGTG TTAATCCGCC AGAGCTCAGT  
13921 GTCGACCAGT AACGCGTTCT TTTGGGATAC TTTCTACTTG CTTATACAGA GTGAATAAAA  
13981 TAGGAATTGA TTTATTCTA AAAATGACTA AGCATTTTTT TAGTCTCTCT TAGTCTCAGT  
14041 TGTGCCATAC ATTCACTTAC AGGATTAAT TCCCTCATTG ATTCTCACTC TCAATGAGCT  
14101 TTTTGTCTCA ATTCAATGCG ATGTTTACTG GTCGGTTCGG TAGTACAGTC GTCGAAGTTG  
14161 ACGACCCAAC AGAACATGCC CGTCATGCGT TCAAATCTTG CACAAGCTTT ACCGTGCAAG  
14221 AGTGGGTGCC TTATCTAGAA ATCAATAACA GATCATTGCT TAGTTGCTGC TATTATTACG  
14281 CAACTATCGA AAATAACCAT TAATGATTTG AAGATAAATG TAGCTATTTT GAAGAGCCTC  
14341 AATATTTCAA CCCAAAAGTT GTATTTTGAT ATTGAACGAA CGTTATGAAA ATTATTGTGA  
14401 CTTTTTTAGG CGATGAAATA AGCAGCAAAC GACAGCTTTG AAATGGCTGT GTGTACATGT  
14461 ATTCTATTTT ATTTCCAAGT ATAAATTAATA ACGTAACAGT CTTACATTAA CATGCCCTA  
14521 GCAACTACAC TTAAGCTTAC TTCATTTACT CAAATCCCTA CAAAAACAAA CTCCGAGCAG  
14581 TCGACGTGCT CGCACGGACC TTTTGTTTTA TTTTLAGCCC GAAAAAAGGC GCATGGTCCG  
14641 TACTTTCCTG GTACGTTTTA CCATAACTTA ATTACGATGG ACCAATTTTC GTAACCTTAT  
14701 GGTGATTTTG TTTTCGTTTC CCGATCTGCG GAACCCTTCC TGGAAGTATC ATCCTAAGCC  
14761 CGGGCTGCTG ATGCGTGTGT ACACTGTAGC TACCCTAGGC TCGTGATGGT GTGCTTCCCT  
14821 TTTTCTATTC ACTTCTATCT TTATCTGAAA ACCTGAAGAA GAAGAATCAC CTGTCAAAGC  
14881 CCAGCTCCAC CAAGCCTTCG ATTTTTTCGAG GAGGGGTACA CCAGGAAAAA AAAAAACAAAC  
14941 ATTTGGAGAAT GATTTTGATG GTGATGACCG TGACGCCGGA ACGAAAAGGGA CACGATGCCG  
15001 GGGACCGCAT CCGTACCTTT TTTGTGTGTT TTTTCTTCC TAAGCCAACA AATCCCCTGT GCGCGCCAAC  
15061 TTGTTTCCCG AAATGTGTGC TTTTCTTCC TAAAGCCAACA AATCCCCTGT GCGCGCCAAC  
15121 CCGCAGTTTC AATTTGGTTC CCGTGTTCCT GAAATTCGAG GACAATCCGA TCATTTCCAC  
15181 TTGGGTGGGT GTTTTTTTTT TGTGTGTGTC GTACCTAACC TTTCTGTCGC ATCGATTTTC  
15241 GTTCGATGAG GGTTCGCGG GGTCTAGAT AGACGGAGAG AATCCGTCCG TCCGACGAAA  
15301 CAAATGAGGT ACGAAAAGCG GTCGGTAGCA CTTCTTCAAA CAGCGTTCAA GAGATGGTTG  
15361 GGAGATTTTT TGGAAGAAAG TGTAAGAAGC AAAGGCTCAT CGTTAGATGG TTGAGCGTCT  
15421 GAAGATATTC TCCCAGCTTC CCATCTCATG CAATCAGCCA ACAGGCAGGA CGTGCCCAT  
15481 ATCTGCGCAA TATCCAGTGT CGTGTCTCGA ATGTCCCCGT CCGGAGAGAG AGCTGAACGG  
15541 ACTGAATTTT GAAGGCGAAG CGAACCTTCG GAATGACTCC AAAGCGAAAA GATATCGGTA  
15601 ATCCTTTTGA TGATGTTCTT AATCATCCAC TCAATTGCGC TGTATAAATT TCACTGTTTC  
15661 CTTCACTTTG CTCCCGGGCT TCTTTGCCCT GTTTCCAGTA AACTTCGAAA CAAAACACGG

15721 TCCACCAAAT CCAATCCCAA ACTCTTTTGG GATCGTCCAC AACAGCATCG TCCCTTCTTT  
15781 AAAGTCTGGT TTTTGGTCAT TCCTTTAGTA CGATTTACTT TACTACTCCA CCTGTTACAC  
15841 ACCGCCACAA TCGTCATCAT CGTCTCGGAA CCGATAATCC TGATCATCCA AAGGTTCCGG  
15901 ATCACCACCG CCGAAGGTCC TTCCTCGGTT TGGTGGATGA CGTTTTGACA GCAAAAAGAT  
15961 GCGGAGCTTT TGCCATTTT TCCGCAAATT CCACACATCC ACCAAAGATA TGGACCPCAA  
16021 TAGAGGTGTG TGTGTGTCCT TTTTCTGGAA TAGGATGGCC CCGCTGCTGG CGCACGGCAG  
16081 ATGAAATGCA ACGGTTTCAA CCGTAGCTTC TTGCTTCCCA ATGTTGGTTA TCGTTGGATT  
16141 ATATATTCTT TACCTTTCGC TCTACAATCG CCTCGTCCTT TATTCGAATT CGGATGCGCT  
16201 CTAGGTATAA ACGTCAGTGT GTTTTCCTAT TTCCTTTCTT TTTCACGTTG TCGTCACGAT  
16261 AGCAAAAATA GTGGCTTCCT TTCGCAGAAG CTTTCGACGA AGGAAACGAA ATAGATGACG  
16321 ACGCTGGGAA AGGTAAATGG TAAAATCTT CCCCAGCAG CATCCGGTAC GCGTGGCGAG  
16381 GCGCACAAAT AAAACGCTTT CCTCCCATCT GTGTGTGTGT GTGTGTGTGT GTGTGGCTGT  
16441 GGCTGGTTGT GTATTTCTTG GTTTGACTGT TCAAATGCAA GACAGTGGAA ACGATATTGC  
16501 AATGCCTGAG CTGCCAAGAA AATGCCACAC AGACACGCCG AAGTATATGG GGAAATGGTG  
16561 GTAGGCGCGC GTGGAGCGCA ACGGCGGAAT TGAAAACGAG AAAACTTCGA AGCTACTATT  
16621 TCCTGCGTCA GGAACTCGTG ACTTTTTCTT CGCACCAACT CCCCCCAAC TCTCATCCGT  
16681 TTTTCCGTCC TTATCTGCCG TTTTTTCTT CCTTCTACTT TGTTTTGTTT TCACTTTTCC  
16741 GAGCTTCACT GACAGGTTTT GGAATGGGTT GGAACTGAGT GGAACGAGTG GGAATAAAAG  
16801 AGAAAGAAAA AGTGGTGCCA AGTGGTGCCA AGTCTTCATG TTCTCCTCCG GTCCTATTCA  
16861 GCGCCGCCGT CCCGGTGTTC GTTCATGTGG CCTTGGTGTT CCACTTGTGC AATTTTCCCG  
16921 CTTCCCGACC AGCGCACAAAC AATCATGCTC TCGCTCTGTC TCTTGGTGCC CGCTAAGAAA  
16981 GCAAACGGCA AAGATCTTTT ACCGTGTCCT GCCCCGCTTC CTGCCATCCC GCTTGCCTTC  
17041 TTCGAACACT TGTCCCTTCG TTCGAAAACC ACTAAACCCC AAAGGCTTGA CTTACGTTT  
17101 CGATTATGCT TCGGTGCGGT GTGCTGTACT CTTTTCCGCG CTTTTCGGGC AAATGCTTAC  
17161 GGCTTACAGA GCAGAGCGAC CATCTTCGCG ATCCTTCCCC GGGTCGGTGC TTCTTCGCTT  
17221 TGCAGGAAAT GATGGAATTA CATTTCCTTG CGCAAAAGCG GGGCAGGGTT TTGCCGTCGA  
17281 GCACCAAATC GAGTTCGGAG AAAACGGTCG AGGACTACGC GCTCGCGCTC CCCCTTTGTG  
17341 CGTCTCTTTG CAGTGGCCAT CCGCTCGCTA GAAGATAGCA GTTGTAGAGT TCACAGTTTG  
17401 TCTTGTGGCC GTGTTGGCT CCCTCGCAAC AAACGCAAGG ATTTTACCTC ACGTTTACGT  
17461 GGAGAAGGCG GAAAGGATCC CACGCCGCAC GCTCTTGAGA CGTGCACAAT GACTTTCCGG  
17521 TACTTGGGTA GGATCTCTCT GCACGATATC CTTCAAGTG TGCGTGTGAC CGGTTCCGTC  
17581 CGTCGTGCGAG CAAGGGTCTG TCGTGCATCC AGATGGCGCT GACACGCTTC GAAAGAGAAG  
17641 CGGAGGGCGC TTGGAATCCA CAGATATTTG TCATCGTTAC CGAGCGCCAG TCCGCCAGCA  
17701 AGTCGATCGG AACGGCATT CCTCAAACCA CACCGCATGG ACAGTTTTCT CCGAACGCAT  
17761 CGAAACCCCC CCTCCGCCGC CGGTACAGG TGTGTACGCG CGGGTGTGCG CGGAGATTCC  
17821 TCAATAAAAG GGCCCAAACC ACAGGCACAA ACAGCATTGT GGGCGATGGT GGTGGTTTAG  
17881 CCTCCCTCCG ATGGCGGCGA CGGCGGCGG ACTGGGGCGA TTTTGCAGG AAATATTGAT  
17941 CCCCTTAAAC TACATGACAA TAAAATACCA TCGGCTACGC TCCATCAGAC ATTCGGAATT  
18001 TGGCTCCCGG TTTTATGGAA AAGCGTTATT GGAGCGCTTC TCAATTTTCT CCTGCCACTT  
18061 TGCTCTTCTT TCGCTTGAC TCGGCCTGTA TTAAGCGCCA CTCGGAGCTT GCGACACATC  
18121 CCCGGAGTGT ATCTTTAATC ACGTTTGACA AATAAATTA TATTCTCCCT CAATTGGATA  
18181 ACTTTTCCGG GCCGACGCGT TTGTGTCCCG CGCTATGACA GCCGAGGATT AGAAGGGCGC  
18241 TGTTTCTGCG TGTGTCTGCC ACCTTTAGTA GCTCCTCGAC GCCAAACCGA CGCCTCAATA  
18301 AATCCGTTTT TTTAGAACCG AACCATCGCA CGCACCATCT TGCAGTCTTG AAGCGCGCCA  
18361 CGGTGTAGAA GTTTTCGCACA TCGGCTTCAT TACACGTCCC GGGCGTGTGT CTTTCGCAATC  
18421 CTTTGGGATG TTGGGTATCG TGTCGTACCG TTGCCCGAGC GAAACGAGAG CTTCTGCCCC  
18481 ATCCTCCTCC TTTCCCGGTT GACGATGTGA AGCAAACGAT AAGAGGCCGC TGATACACGG  
18541 TTTTGTGTAA CGATGAGGCC GCAACCGCCA GCCAGCGCTG CGGGCTATTT CTTTTGTGTC  
18601 CGTGCCTGCC TACCTTTAGC CGCTCTCGGG TCCTTGTTTG TCTAAGCGAG AACCAAGGAT  
18661 GGCAGGAGGT ATTTATGAAC TCCGGTGCCT GCCACTCCTG CGAAACGGGG TGTAAGAAGT  
18721 GTACTGGGTC GACCAGCATA TTTCTTAGCG GCTTCGTTTG TGTAAGAGGT TACGAACAGC  
18781 GCCGTCCAAT TTTTGGACGA GCGAAGTAGA CGGAAGGTGT AGGAAAGGGT AAGCGCATA  
18841 TTAATTGAAT GTTAATCCAT GCAGGATCCT TTATCTCTCT CTCTCTCTCC CGGCACAATT  
18901 TGGCCTCGCT TTTTGCAAAA GGCATTATAC TATAACAAAC ACATGAAGCA CTGGAAATGT  
18961 TTGCTGATCT TGCCTCTCTC AGCACGGCGT TGTATGTGGC TGCTCATCAA AAGATAATGG  
19021 ATATTGAATC ATGCCAAGCG AACGATAGAA AAATAGCATC GAACTCGGGG AGTGAGTGGG  
19081 TGCAGAGAAC GAGACTGGAG ACGGCCTGTA TGGCCGCTC GTGTATGTAG GAAGGCATGT

19141 GTCCAATGCA TGGGCAATAT GAAATGTTTT AGTTTACAAT GTTACTACAC AACCACGGTG  
19201 GTGGTGGTAG CTTGCCCCGC TGCACGTGTT TTTCTGCTCG ACTCGAGGAT TGGTTTTTAT  
19261 ATAGCGCGCC CGCCCCACTG ATGATAAGGA ACTTTATTGT TGATGTTTTT CTTACCCCCA  
19321 TTGGGGAAAAG ACAAGAGAAT TCACCGAGAG AGGAAGTGGT AATTTGATAC AGAAGACTGG  
19381 AGAGGCTTTT CTTTTTGTAT AATTGAGGCT ACAGGCTTGT AGAAAAAGCC GAAGGGAGAG  
19441 CTACTTCATG GGGATTTATG TTCCATTGTA GATTATTGAT AAACAGATTA TTTGAGTTGG  
19501 ATTGTTTTTT TATGAATTAT TTAATAAGGT AATACAATAA TGATGGTACA AATAATGTTC  
19561 ATGTAATGGA AAGATAGTCA TATAAGCGTT TGGATAGAGT ATCGGAAAAA TGCCAGCGTC  
19621 TAAAAC TAGA ATGTCAGTTT GAATGAGAGA ATTGAACTTA CGACGTCCAG AGCGTAAGAC  
19681 CGCTTGTCTT GCCACTGCAC CACGGCTCAG ATGCTCATGC CTATCGATTG GAGACCCATT  
19741 TAAATCTCAC TTTTCAGTAAC TGCTCTCACT GCTTCAGTTA CTTTAAACATG TATAAATGAG  
19801 AGCATGTAA TACTTAGAAC TTACTTTAAA CCATTTTCTT TCGAATATTC ATCTTGTAAT  
19861 GCTGAAATTT GTCACGAGCT CTCTTCTTTT CTCTCTTTCC ATCTCTTACC CTCCATTCTT  
19921 CGCAGTTGTG AAATTGTTTG CCCAAAGAAA TTGAATTTTC CAACCCCACA GATCTCTTCG  
19981 TGTGCGTGTC AAAAGAGGGG GCCAGTCAGG CATGCTTTGA TGTCGTCCTG ACCTGACCCG  
20041 AAAGTTTGCT AGCAGGCTGG GGTGACTGCC TTATTTTTTT TTCTTCTTCT TAAGATGCCT  
20101 CGTTGCACTA ACCAACCATA CCCTACCGCA GGGTGAAACT TTGCAGACGG GGAAGGCTCA  
20161 CCGACCCGAC CCCTCCGACA CGGTGAAGCT CGTGGCACCT TTGAATCGTA TATCGCGTAT  
20221 TCTACCCGTG GTCCGCGAGT TCGTACTTTG CAAAAGCTAG CCTGGCAGGC CTGGTGGTAC  
20281 CAATTGGGCT AATCTACTTT GCATTTCACT CTGCATAATG TACGTTTATT TAGTCGGTTT  
20341 TGTGTGAGTG GGTATTTTTT TGTTGGAGAC TGTTTCGATT GGAAGGTTTC CAATGTTTCC  
20401 CAAAGA ACTG AATGACACTT TAATATTTAG ACTTTTTTTT GTCTAAATAG AGCTGGTTCG  
20461 ATAACATGTT TCGTACCACA CAGACACACA ACACAGGTTA CTTTGGCAAT AAATTGTA  
20521 ACAACGACCT CGTCTTGGTG CCATTCGGTT TATTTCTTCC AATTGAAATT GCTTTTAATT  
20581 CCGGCCGGCG CGCTCTACCA CCGGTGCTGC CCATTAACAC TTGATGCAAT AAATAATCCG  
20641 CAACTTTTGG CGCATTTTCA TTTTCGCACT TTTCCATCGC GTGTGTGTGC CCTATAGGTG  
20701 TATAGGTTGC CGTCTCAGAA CTTTGTGTTT TCTTCTCTCT CTCTATGCTT GCTACCTTCA  
20761 ACATCTGATG ACTCACTTTT CACCTGTGAA GGCTGCCACC GTTCACACAA GGCACCTCG  
20821 TGGACTCGT GCTTTCAGGT TGGGAATTTA TGAGCTTCCC ATCCAGACGG ACGGCTATAA  
20881 TCGATGGCGG TGGTGCAAAG AATTTCGATT TTCGTTTCATC AATAGGGTGT ATGCTTAGCG  
20941 TTGTGCTTGG TAACGGAAGC GTTCGTATAG GTCGGTGAAA CCTCGGCAGC TTGTTAAATA  
21001 GCACACGGGA AGTTTGTGAT ACGGCCGCGA CGAAGGTGAT GGTA ACTAAT AGCCAAAACA  
21061 ACCCCCAACC CCTGTGCGGG TAGTGTAGTA CATGGAGCCA CTTAACTGCT TGCTAGGTGT  
21121 TATTTCCCAT AGAGGAAATT AGTAGGGAAC ACGTGAAAGA GGCACATGCT TGGGAGAAAC  
21181 GGTT CAGAGC TTTATTCCCA CTTTCCGATA AAAGCTTCAA CCCTCTCAA GGGCTGAGAA  
21241 GGGACACGCT TCCAGCAATC GATCGAAAAG GTTCACCCAG GTCGTCTTGC GTA ACTTCTA  
21301 CTGCCCTGTT CCCCCTAGG TTTGGAGCAT TCCTTCCCCC CTTTCTCCCA TCCTTCAATC  
21361 AGCGCAATCG CTTTCGGGGA CTAGTTTTTT AGTTTGAAC TGTTGTACAT ACGCAAACAT  
21421 CAATCATGTC AACAAAACGG CAGTTTTGTG CTAGCAAAG CAAGGTGTGG TACCATCAA  
21481 CAGCGGACGG ATGATGCCGC CCGTTCCTGT ACCGTATCGT CATGCCCCGC GCGGTCATG  
21541 CAGCGGTCGC GTTTCGTTTC CGTTCCTGTT GTTCACTGGT TTAGCTCATC GATCACATCA  
21601 CGGTTGCGCC TACTGCGGGT CTTCGTTAGC TAGTTTTTCC TTCCCTTCCAC ATTTGCCAAC  
21661 CCAGCATTGA TCGTTAGAAA TCTTTCGGG TCCATTCGGG TGCGAGGGAA AACGGGGGTC  
21721 AACGTTTGCA TTTCAAATCG TCGACGGCGT TTGTGGTGGA CATGGTGC GC TTACGGTATA  
21781 AGGGTCCGGT GTCCAAGGCG CCCTTGGAGC CAAAAATTTG TCACCCATCT ACCACTGTGT  
21841 GACTGACAAC AACTCTGTGT GTATGTGTGC GTCGGTGTGC TTGTGGGTTT CTGCCTTTTC  
21901 AAGTGTGTTG TTCTCGTTTT GATCGTTTCA TTAGTTCCGC CGCCCAAACG CCGGGGTGCA  
21961 AATGGGCACA ACGAAAGTGA AATGTTTATG ACATGCTGAG CGTCAAATGG ACGAACTGTG  
22021 GCGGAGATCG TTTTCGATATG ATTTGTAGAA TAATAAATGT GAGGCTTTAT ATACTTTTGT  
22081 TATGGAGTAG TACGCCAGCT ATGGCTTACA GGATTTTTCA GA ACTTCTCA TAGTTGTGGG  
22141 ACACTTTTTC GTCTCTTTCT TACAGGAAAT GAACTTTATA TGCTGAGAGA TGGACCCTTT  
22201 TTGGACAAAA CTAATAGGAA ATTTGCATTG AATTTGACCT AAAAGGGTGT CATAGAGTCC  
22261 AATATCCATC ATATAAAGCT TCTTTCAGAT AAGATACAGT GAAGAAAGTG TCCCACA ACT  
22321 TTGAGAACCC CTGAAAACCT CTTGAATATG TTTCAATTATG TGGCTGATTCT GTAGCAAAG  
22381 TCCTTTCAAT CTCGGAAGGT AGATGTCTTT TTCTCGTTTT TTTATGTTCA CTACCAATCA  
22441 TCTATATATA GGTAATAGAA ACTTTTCTCT TTCTAAGATA ATAGAATCTA CATATAGGTA  
22501 ATAGATATAG GTAATAGAAA CTTTTGTAAC TATTTGTATC TCGAAATGAT CCAACTTCTT

22561 GAAGAATTTG AAATTTTCTT TTAAAATTCA TAAAATTCGT TTCTGCTAGC AAAATTGAAG  
22621 CACAACCTCCA ATTTTTTCATC GTGTTTCGTTG AACTAAATTG ACCGCTAAAA CCGCATCCCA  
22681 TATTTTTTATA CCTTTTTTTA TTCACTAAAA ATAACCTTTG GTGCAACGAG AAAAACAGTT  
22741 CCAAAACACA CCACCACCCA CTTACCACCC CAATCCTCTC TTTCTTTTCAT CCTGATCGAA  
22801 TTACGTGTTA CAGTTGTTCC AGCCCAGGTC GCTCTATTTT ATTCGTTTTT CCCTTACATT  
22861 TTGCGCTTCT ATCTCTCCCT CGATCACGCG CACCTCAACG GAGAATAAAT TTTCCGGTAA  
22921 GATTAGCATG GGAAAACTA ATTTCCACGC TGGTTACAT CCCTCCTCT GTCCGAAATA  
22981 AGTGTGTGTT TTTTTCCTT TTTACTGGAA GCTTTTCGTC ATCGTTCTCG TTTTGCTTTT  
23041 TTTTATAGTC GCTTGTTTGG TACTGACTGG CGTCTGAAAG TTGTTATTTG CCCAGCCCAA  
23101 TGCGGAGATT GAATCGTTCC CCTGGTGGTA GTGGTAGTGG TGGTAGGTGT GATGGTCAAA  
23161 TCCTGACTAA AAACCTTTTC GGAAGCTTGT CGGTAAAAAT CGATATTACA GCAGACTACT  
23221 TGCTACTCAC ACTCTTCCCT CGTCAATGAG CCCTGTCGTT ACGACGAGGC TGTGAAATGA  
23281 AGTAACTCTA ACAAATGGCA GGCCTTAGCA GGCAGGAAAA CTACCTCCGT AGGCACAGTG  
23341 CGAGGTAAAT AGAGAGAGAG AGAGCGAGAG AAGAGCTTTA TTACATCGGA ATTGGAAATG  
23401 GTCTGCGTTT GAAGCGCTCT GGAGCGAAAC TTAATCTTAC CTTTTTAATC TGCCTGACCC  
23461 CACCTTTACC CCACAATTCC CTCCTACACA CACAGCGCGT GACGCATTCC GATTGCCACG  
23521 ATAGTAGTGG GCTTAGCCAT ACCGTAAATC GGGTTTCGCCA TGGGGGGGTA ACGATCACAT  
23581 TTCGGCCATA GTCATGCCTC CCTCCACAGC TCATTGATTG CTAAATGTCG TTGTATTTCA  
23641 TGCCGTTGCC GAGGACTCTA TTTTGGACA GGGGTCCAGC TCCTGTCCTG AGTTCAGAGT  
23701 TTCCATCGGT GTTAAAGTCT AATCTCATT CAGTTCTCCT CTTTCTGGCG GGGTCCCGT  
23761 GATGGAAAGC AAATCGAAGG ATATTTACCC GTTTTATTTA TCGCAGGATG AGGAATCAGA  
23821 GGGAGAGGTT GGTGAAAATG TTCGACGCTT CGTTATCGGC AAACCCGACG AACCACAACT  
23881 AGTGGTTATG TTTTACTGTG GCATATTGAA CGTCTGCGCT CTTTCTCTCT CCCAGCAGTC  
23941 TCGGTTGTGT AAAGTTTCGG TTTTATTACA CGGTTTTTACA TCGGCATATT ACTGTTTACG  
24001 GGTCCCTTCA ATGGTGGTGG TTTTGTGGGG CATTTATTTA CGCTTCGTTG CGTGTACAAT  
24061 TCATCTGCTG GGAGATGTTG CGTCATTCTG ACACGTGCTG GGCTGAACTC GTAATCCTTT  
24121 CGGGAGGTTT AATTATCGCA AAGAGTTCTT AAAATAATCT AATCAGATTA ATGTAGGCTA  
24181 AAGTTTATAA TTACAAGAAA TCTATTTCAA TCAGAGGAAA GCCAATGGGT CCAGTGGGTT  
24241 CAGTTTAGTG ATTTGAGGAG CGCACCCACG ATTCCGATCC GATTATGGGA AAATGAGAGT  
24301 CGGCGTTTTT TTGTCTTTCA CTTTGCAGCT GCACTTCGTA TCTTAGTTTC GAAGCCAAT  
24361 TCCGGACGTC TCCGACTCTG GACGACTCAA GACGACTCAG GACTAGTCCG CACGACTACG  
24421 GAAGAGTTCT GACGACTCCG GACGACTCCG GACGACTCCG GACGACTCCA GATGACTCCA  
24481 GATGACTCCA GATGACTCCA GATGACTTCG AACGACTCCG GACGACTCCG GGAGATTTTCG  
24541 GACGGTCCCA GACGATTCCG AACAACTCTG GATGACTTTG AACAACTCCG GATGACTTCA  
24601 GGCAACTACG AATGACTCAG GACGCCTCCG GATAATACTA GGCGGATAAT ACTACCTACC  
24661 GGAGTTCCGG GGAGTCGACT CCGGATTTTC GCCAACTTCA TCCATCACTA GTTCGATTGC  
24721 TGCTTCAATT CTTAGTTCTA AGAAATTAAT CCATGAAACG ACGACTTGGC CATAATTGAT  
24781 CCTCTTCAA TCCTGAGATC TAATTACATC TTCTTACTC CTCTTCCAGG TTGACGAGGG  
24841 CCGCCTCTAT CAGGAGATAA TCCGCGTCGA AGCAACGGAC AAGGACTGTA CGCCCCTGTT  
24901 CGGCGATGTG TGCAAGTACG AGATCCTCAC CAACGACCAG CCGTTCACGA TCGACAACGA  
24961 GGGCTCGATA CGCAACACGG AACCGCTCTC GCACAAGATC TCGCACAACC ACATCCTCTC  
25021 GGTGGTGGCG TACGACTGTG CGATGAAGCA GTCCGCCCGG GTCATGGTGA ACATTGCGGT  
25081 GCGGCGCGTC TGCGAGGCGC ACGTGATGGG TGTGGCCGAG CGCATCGACT ACGTCGCTAA  
25141 CTCCATGGAG AGTGTATCGC TGTTCCCGAA GATTCACCTC GAGCTGTGCG ATATGCAGTG  
25201 CAAGGGCGAG GACATGGTCA TCCAGTCGTC GGTGTGCTC AAAACCAAGC ACATCTCGTT  
25261 CGGTTGCGAT CGGGACGCGA GCCAGTGTTT GCGCCGGCTG AGCGAAAGCG GCAGTGGCCG  
25321 GGAGCGGGAC GCGGATGGGC TGGTCGATTT CTTGCAGAAG AACCAGGACT GGACGAAGGA  
25381 TCTGACGTAC GACGAGGGGG CGGAAGCGAT CTTCCACTTT GACGGTAGCT GGGGCGGAT  
25441 CGTGCCGAAG AATGTGGTAC AGCCGAGGA CTTTGCCGCG CACCAGTTCA GCATCGTGAC  
25501 GATGTTCCGG CACAACAGCA TCGTGAGCAC GGACAAGCAC ACGAAGGAGC ACATCGTGTG  
25561 CAGCGCGGAC GACCACAAGA TGAACCGCCA CCATATGGCG CTGTTTGTGC GCAACTGCCG  
25621 GCTGATACTG CTGCTGCGCA AGGACTTTAA CGACGGCGAT TTGAACATCT TCAGCCCGGC  
25681 CGAGTGGCGC TGGAAGATAC CGCAGGTGTG CGACAACGAG TGGCACCCT ACACGATCAA  
25741 CGTGGACCTG CCGAAGGTGG ACCTGTACAT CGATGGCATT CGGTTCGAGA GCAACGTGGA  
25801 GGACCGGCAC AGCAATCCGG AAGTGATCGA TGAAGTGGCG CTGCATGCGG CGCACGGCAT  
25861 TAACACGACG CTAGCGATCG GCGCCTGCTA CCAGGGGTCG GAGAACCAGG TGAAGCACGG  
25921 GTTCAGTGGG GATATTGCGG AGATTAAGCT GTCCACGCGC AAGGTGCTGA CGGCGAGCCA

25981 GATCCGGTGC GGTACGGACT GTGCGGAGAA GTTGCTGCCA CCGGCCGACC ACTACCTGGA  
26041 GCCGGAGCAA CAGATCCAGT CGAACACGCA GATGAACAAG ATCATCATCG AGGGCAGCAA  
26101 CAAGACGAAC ATCGAGCAGC TGCTGCAGCA GATCCAATAC ATCAACTCGA AGGAAAGCCC  
26161 CACGATCGGG CGCCGCAACA TCCAGGTGAT GACGACGGTC AGCTGCCCGA ACAAGAAGGC  
26221 GATTTCGACTG CCGACGATCG ACACGTACAT TATGGTCAGC TCGGCGGGCA GCAGCCTGAC  
26281 CGGGGGCAGC ATGCTTGCGT CGGCCACCTC CTCGTCTCTC TCGTCCGGGT TGTACAACAA  
26341 GATACTGGTG GATAAGCCGC TCGCCACCGA CCAGAAGCCG CAGATCGTGA TCAGCGGCAA  
26401 CTCGAACCAT CTCGTCTCGT ACCCGGACAT TAAGGAGGGC GTCAAGATAC TGGCCCAGAT  
26461 CAACATCAGC GTCTACACTG GGAAGGATAT TCGGCCCGAG CTGCAGAAGC TCGATTCTGTG  
26521 CAATGTGAAC GTGTTCCCGA GCCTGAACCC GGACCACGAG GAGATTACGA TCGACGATAA  
26581 GGACGGTGCG GATGAGTCGC TGTTCAAGTT CGACATCAA ACGCAGATCA CGAAGGAGGG  
26641 CGTCGAGATG ATCGGGTACG ACACGATCGA GAACTACCAG CACGTGCTGA AGTCGTCTGT  
26701 GTACATCAAC AAGAAGCCGG CCTACTATCT GAATCGGGTG TTCAAGCTGA CCTGCTCCCA  
26761 GGTGGACGAC CACTTCCGCA GCGCGGAGTA CACGCTCACC CTGACCGTGC TGCATCCGAA  
26821 GCAGCAGCCG ACCTCGTCGA TTGCTTCCGC CTCCGCACCA TCCTCCAATG TGTGCTGGC  
26881 CATCTCGACC GCCCATCGG AGCAGCATCC AGCCGTAGCG GTCGATTTCG ATGGTAAGAG  
26941 TCTACTGGAC GTTAATGTCT CCTGGGTACT TGGGTTACAT GTTTCTAACG TTTCTCACAA  
27001 CTTCTTTTTT TCTCCCACCG CCACAGACAA TGCAAACCAG TACGCGCACG TAATGCTCCA  
27061 CTCGCACGAC GTCCAGGAGT CGCAGTCGAA GGTGCGCAGC AGTGGCGGGC CCGCCCTGCT  
27121 CGGCCACGAG AAGCTCGCCT CGTCCCCTC GACCATGTTG ATCGTGGTCA TCTGCGGCTC  
27181 GTTCGTGCTG CTCATCTGCG GCGTCGGCAT TGCCCGTCTG CGCAACAGCA ACGCGGCACT  
27241 GGCGGGCGGC AGTAGCGGCC ATGGTGCAGC GGGCGGGCGG GCCGGCGGCA GTGCGTTTCG  
27301 GCGCAACCTC ACCGACAAGC ATCTGCCGTG CCCGAAGGTT GCGCCGGACC AGCAGCTCGA  
27361 CTGGGACGAT TCGGCGCTCA CCATCACCAT CAACCCGATG CAGCACGACG CCCTGTGCGA  
27421 CGAAAGCTCC GAGTCGGACA ACTCCGACTC CGAGGACGAG GAGGTGCTGA ACGGGCGCTA  
27481 CAAAAACGTC AGCCAGCTCG AGTGGGACAA CTCCACAATG TAAGTGCAGT GCGCCGGCGG  
27541 CGAGCAATCG GAAATCCCTT TCCTCGTGGG ATGATTGAAG AATCTACCGA ATGTGTCTCTG  
27601 CTTTTTTGCG CGCTTGTGGG TGTGTGTGTG GGTTCGCACA AGGATGGACA GCTTTCCAG  
27661 CAAATCCCCA TTGTTATTAC TATTCAAATG GGTTCGCTT TTCCGTTCCG GGACGGACCC  
27721 CATGGATGGG GAGGGGTTTT GACAACGTA ATCAACGCAA CCACTCCACT TTTCGTCTGG  
27781 TTTGCTGTCT GTCTTCGTTG CGGGACAACG TGACACACTC GCTTTCAGGC AATCGTTTGC  
27841 TTACGGAATC GTTGCGGAAC CGTCTTTTTT CTATGTGTGG TTGTGTCCGG GGTGTTTTTT  
27901 TTTTTGTTCT GTTCGTCCAT TCCATTGCGA ACGGTAACAT TTCAAAGCA ACTCCACAGA  
27961 ACCCTTCCGC CTCAGAGCAC TCTCGCCGCA ATTGGATCCC TTTTGCGACT TTAAACCATT  
28021 CCGTGGGGCC AATTGGAAGT GACGCTTCCT CTTTTCTGTG AATCAACCAG GATTACAGT  
28081 CGTTTGGACA TCGCTTTTTT CTCGAAGTAA TAATGAACTC CCAATCACGT TCAAGTGCCT  
28141 CCGCGTGAGC GTACACGTAC ACCCGCGGGT GTTGAGGTTT TGGGAAATAA TGGATAATGG  
28201 ATGGAAGTTT CGGACGTAAC CGACCGCACT ACAGAGTGGT AGTAGTAATA GTACCAACAA  
28261 GAAATGTCCG GAAATGTGT GTGTCCTTTC GTTCGCTGAA TTGCATGTGA TGGATGAAAT  
28321 GGAATACCGC ATTGCCCTCG GCAAACAGAA ACCTGGTTGG TTTTGCAAT TTTTCCAATG  
28381 AATTTACAC CGGGCAATAT TTCACCGCGG CCTGTGGAGT GTTTCTTGT ATATTGTCCT  
28441 GGGTTGCGCT CTGACAATGG TATAGTGTGG CAGATATTTT CCAATAATTG TACTGTGCTT  
28501 TCGCGCAGGA AACGATGTTA TTGTAGTAAA CTGGACTGTG TAATGCAGTG TGTTACATAC  
28561 GTTCAATGAG ATAATCATAA ATTTAATGCC TAATTCCAGC AATAGGAGCA GTCTAAAGGG  
28621 CTTTTGATTA TTGTGCAAAA TATCAACT

//

LOCUS 1 1555 bp DNA linear PLN 25-FEB-2004  
ACCESSION 1  
VERSION GeneMark.hmm v3.0 self\_training  
ORGANISM C.elegans  
FEATURES  
CDS CHR ---  
join(500..554,838..1055)  
/translation="MKYFLLVLICTTISAVFAYPPYQAYNPYYQSSSDPYYPFRL  
WNSPTTYQIGTGVVPTYSAQSSYNPLYPYYQYNWDFNTDFYNPYKN"  
ORIGIN

```

1 AAGTTTTTCGT TTAATTTTCA ACTTCTTTTA TGCTGGTGTG AGATCGTTAA TTTCAACACT
61 AATCTGATAT TTGCATATTA GAAAGTGTCA ATACTCCAGT TAATCGGAAT CGTGTCTGGA
121 ATTAATCTGG ATTCTGAAAA TAACAGAAAA CCCTTTTGTG TTCTCGTTAG TCTTGAACCTC
181 AAAGTTTTTTA ACATATATCG TATTACATAT TCAATGTACC AATATGTTTT CAAACAATGA
241 CATCACATTA TCTTATTTTG GTGAAACTCG TCACTTCCTT TTTCTGTCCG AATCAATGAA
301 TCAGGACTAA TATTATTTCA CGAAAGAGTC TTCAAGTGGT TGAAACCTAT GTGCATCATG
361 CATTTTATCC CTTCTGTAAA CAATTGGCTC TGTAATAATA ACAGGAAAAA AACGATTTTA
421 GTGTTTGATC AAAGTGCCAT ATAAAGAAAA TGGACCGCTC ACAAATAAAC GAAATTTAGA
481 CGTATTCCGA AACACTAACA TGAAGTATTT TCTATTAGTT CTCATTTGCA CCACAATTAG
541 TGCTGTATTC GCATGTAAGT TTGATCCAAA ATATGTTACA AAAAGTAACA TTTTGTTTTA
601 AACAGCTGAA TTATAAAAAA AATCCCAGAT TTAACAAGTT AGGATAAAAC GCTCACGGAA
661 CGGTTAAATT TTTTGTGATA AAGACTTGGC CTTATTAGTC GTCTCGAATT AAGTTAATAA
721 TCACTGTAAC TTAAGCTAGG TCCTCCTAAA GACATATTAC GCCAACTTTC AAGTATTCCA
781 TTTTGTGAC TGAGTGGGAA TTTTCTGTGTA ATATGGAAAA AAATTAACA TTTTCAGATC
841 CATACTACCA AGGCGCGTAT AATCCATACT ACCAAAGTTC TTCTGATCCC TACTATCAAC
901 CATTCCGTCT CTGGAATAGT CCAACAACAT ATCAGATTGG CACCGGAGTT GTCCCAACCT
961 ATTCGGCTCA AAGTTCGTAC AATCCATTGT ACCCATATTA CCAATACAAC TGGGACAATT
1021 TCAACACCGA CTTTTACAAT CCATATAAAA ATTGATTATC GAAATAAACT ATTGACAGCT
1081 TTTAACTTTT AAAAAGATTA TTGCCACTAC TACAAGACTA CAATGTTCAT CTCGCTTCCG
1141 AAATAGTTTA TGTTCTCAA TATTTACTTC ACATCTCTGA ACCCATGTCA CAGAAGCAAG
1201 CTCATTGAAA CAGAAACATT ATAAATTAGA AATTTTTTAA TTAATTGCGA AATTGAGGAA
1261 GTCAATTTTT TATAACAACC CAATCAAAAC TTCATCATCA TTATTTTGTG ATCAAGTGGC
1321 AAAGTGTAC TCTTTTCTTT TTTCTAGTAA ACACCGAGTG TAGATTGTTT GGATTTTCAA
1381 ATCTTCTTCT CCACAGTAGT TAGTTGAAAA GTAAGAAAGT TAAATAGAAA GAGGCGGAGT
1441 GTCCACGAGT CTATTTGCGT TGATTCATTT TGGCAACCGA TCATTGAGTA TATAAGTGAA
1501 AAGGTCGTGC AAAAAGAACA GAAGTTTCAC GAATCATGCA GTTTTTAACG ATTTT

```

//

```

LOCUS          2      2217 bp      DNA      linear PLN 25-FEB-2004
ACCESSION      2
VERSION        GeneMark.hmm v3.0 self_training
ORGANISM       C.elegans
FEATURES
  CDS           CHR    ---
                join(500..580,1523..1717)
                /translation="MTFFSILLLLFCAMVVMMSKVSIAIGRREENGMPFETRTRLRPFPO
                MTDSEDDSTKTQVMVLLVGFVSLAITVIRFLRKYSERQRLYSSFN"

```

ORIGIN

```

1 ATTA AAAAATA AAAATCATCA AAAAGAAAAA TCACCGTCAA AGCTACAAGT GTGCAGTGAT
61 TCTCATTGCT AGGCATTTCC AATCATCTAA ATAGCATTGC CTGCCATAA AAGAATAGAA
121 GGAAGCACCA AAGTGTCAAT TTTGTTGCGTA AAAACTGGGT GTACATTCAA AAAGTCTTGT
181 ATAGCTTAGC TAAGCTCTTC ATCTAAAAGC ATTGGCTTCA TCTTTTCACT CGTCATTCTC
241 CTCAACAACCT CCACAACAGT AAAGTCATGC CCTTCGTTCA TTAGTCAATT CGTTGAAGTC
301 TATTAGTCTT TCGAAAGAAA CGAAATCATT CCATTTCACT AAATTTGACG TCACCAACTG
361 TCTTCATACT CCTCAAACT CCGCCCCGTG TGTTGTGCTG AACC GTTGCC ACGGGTTACT
421 CTGGATACAG AAACATCTGC TCTTAACTAA TCTACCTTTT GCGTTTCTCT GTGCCAATTT
481 TAGATTGAAA ACTGCTCACA TGACATTTTT CTCCATTTTG CTTTTATTCT GTGCAATGGT
541 GGTTATGATG AGCAAAGTTT CCGCTATCGG ACGACGAGAG GTGAGAATTT GTATTTGAAA
601 CATCTCATCG GGTTTTGGCC GAAACTTCTT GACCAAGTTT TTCCAAAAAT AACTTGGTTC
661 AGAAATGCCA ATTGGCCAAC CTTTGTCTAG GTCTACTGTT ATTCAAATCT GAAACAAGTA
721 TTGTCAATTT TTACCCAAGT TTTTACGGCC AGTAGAAACG TTTTGATGAA AATTGGATGA
781 ACCTTAGCGC TGCCTAAACA ATGTGCTACC AACTTCGGAA CCACGTTAAC ACTTTTGGAC
841 CGTACGAGAA GGCCAAATTC CAAAACTTT GAATTTTTTA AAATTTTACA CTTACTTTAC
901 CCCTATTTAT TGTAAGATT GATATATTGA TGGGGGTGAG GGGTCCTATA TTTTAAATTT
961 TAATTTTCAT ACTACAACAA GCTTTATTGA TAAAGCTCTC GTAAATAGTA GTATGTCATG
1021 CCTTAGATCT ACAGTAATAA ATGAAATATC AAATTAATGT CGAGGTA CTG TAGGAGTTTT
1081 TCTATCCAAA AAAAACCTA ACAGTTCAAT TCTTTAAAT CGATTTTGTG ATAATTTGAG

```



```

1141 AATTCGTGAA CTTAATTCAA CTTAACTTAT TCAACTGTAT AACTTTTTAAC TTTCCACTTT
1201 TAAACTTATT TCAGTGAGAA TGCACAGTTA ATTTTTTTTAT AGGTGGGGCA TTTTCAGCCTT
1261 GACCGCGTGG ATTGTCCAAA CTTATAAAAA ACTTTAAAAA TAACAGCAAC TATTTATTTT
1321 TGAGAAGGTG ATATAATCGA TAATAACTGA AATTAGTTAA TAAAAAGTTT CCTGGGGATT
1381 TATTCGATGA ACCAAATGAG TATTGAATTT TTGCATTTCT TTTATACCTG CGTTTCTTTC
1441 TTGCAAAATC AAGTTGTTCT GATTGATATA ATTTCCTTAA GGATAATTAT AATTATTTCA
1501 AAATTATTTA TTAAAATTCC AGGAAAACGG CATGCCATTC GAAACTCGAA CTCTTCGCC
1561 ATTTCCCAA ATGACAGACT CGGAAGATGA CAGCACTAAA ACTCAAGTAA TGGTTGTTCT
1621 GCTGGTTGGA TTCTGTGTTA GTCTTGCCAT TACTGTCATC ATCCGATTCC TTCGAAAGTA
1681 TTCTGAACGA CAACGTCTCT ATTCGAGCTT CAACTGATAC CATTATTCTG ACAAATACTC
1741 TTTTGCACA TCTCTCTTTC TCTCTTTAAT TCGCAGTCTC TCATACTTTA TATCCAATTA
1801 CTTTTACTT TTATTATGTG CAATAAAGAA AATTTGATTA ACAATTTGGA ATATGTGGAA
1861 ATAAGGTTAA GCTTTCATTT TGGCCTGGA AAAACTGAAG ATTTGCTTAA AAAGCTGAAT
1921 ACCTGGTACT GATAAAGCAC GGGCATGTTG AATTTTTCAA AATTTAAAGC GTAGGAAACT
1981 TTTAGTTTTT TGCAAATTTT GGTATACGTA CAACTAGTAC TGTTCCAATT ATGTTTTGAG
2041 TTAGTGAAAT TGTATTTTCT CTTCTTCGAA CACCGAATAG TTCAGACTGA AAGGCGGTAT
2101 TTAGACAGGC AGGCACGTAT CCAGGCCGGT TTGTTAAGGC AGGTTTGAGG TAGGCACGTA
2161 GGAACGTAGG CAGAATTTAG GTACCTATAG GTAAGAGATA AGCGTGACAT AGGCCTA

```

//

```

LOCUS          3      1429 bp      DNA      linear PLN 25-FEB-2004
ACCESSION     3
VERSION       GeneMark.hmm v3.0 self_training
ORGANISM      C.elegans
FEATURES
  CDS          join(500..764,916..929)
              /translation="MESNLDVGSCLLDECSSAGSHRKLALSAASSLHAPSESSMSR
              KRSIRERMAEMADSRNRNPKPTPPSIFEEAQLIGKFSGQRIDLLSVTFV"

```

ORIGIN

```

1  TGTTCTCTCT CAAATTTTCC CCCAAAAATA GGCGTTCCTC ACTTTTCTTA CGCGTTTTTT
61 TCTCAAAAAA GGCCACCCAC CTCGCGTCTC AAACGACAAA ATAGTGAGAG ATGCGTCGCC
121 GCCGAAAAAT TCAACAAATT AATTAATTGG TCCGGGAGAG ATGAGGAGGC TCAAGTCAGT
181 CAACGGCGCG CGCCCCGAAA AACAGCTTCC TATACATCCG TTCTTGTCTT TGCGGCAATG
241 CACCAATTGC TCTCGGGGTG CGAATTGAGC CATTAGCCGA TTCGGCTCCA CCCCTCAGCG
301 CTAAGAAACG TGTGCTCGGG CGCGCGAGAG TGTGACACAG CGCAGGCGGA GCCTCAATAA
361 CTCATCTTTG GACACCTTCT GTCCTACAAC TCCCCTAAC TACCATCTCC GTAGTTGTGC
421 AATTTCCAAT CCCAGTTATC TATATTTATC TATTATTCGC ATCTTCCCTC ATTTTATCTT
481 GAATTAACTT TGTATAATTA TGGAGTCGAA TCTTGACGTG GGCAGTTGCC TACTGGACGA
541 GTGCTCGAGC GCCGGATCGC ATCGCAAAC ATCAGCATA TCAGCAGCGT CCAGTCTCCA
601 CGCCCCATCA GAATCCTCGA TGAGCCGGAA GCGAAGCATT CGGGAGCGAA TGGCCGAAAT
661 GGCAGATAGC AGGAGGAATC CGAAAAAGCC AACTCCACCT AGTATTTTCG AAGCTGCACA
721 GTTGATCGGC AAATTTTCCG GGCAACGCAT TGATTTGTTA TCAGGTAAGT GATATTTCTG
781 TATCTTGTTT TTCGCATTTT ACTCTGTTAT TTAATTTAAA CTAATCTAAA TAATATTATA
841 AATGTAATGT GGTTTGATAC TATGATCAGA CCCTATAATC AAATTTCCAA ATTATATACG
901 AATTCGATC TGCAGTAACA TTTGTTTGAA CAGTCAAAAG AAAACAAAAT GTTTAGTTCA
961 TATAATGTTG ATTAAGCCAA TTTTGAAGA CATCCCTTCC CTTTCGTAAT GCTTATTTTG
1021 AGAACTTTTG GGAAAACAAA ATCTAACCAG TCATTACCCA TCCAAATTGG CAGCTCGTTA
1081 ACCAAATCTT TTCTTAGCCA CTCCTTCCGT CTCTAAAATC CCATGAATCA TATTCTATGG
1141 AATTTGGAAG TGGGTTCTGA GTAACTTTGG CTGCAAAGCT CCGTGTTCCG TGATGGGAAA
1201 CACATAAGAG AAAGGGGAAG AAAAGTTTAA AAGAAAGCCC CTCTTTGAGA ATTCTGATTA
1261 TAAATTCGGC ATATCCACTT ATTCTTCTTA TCCTTTCCGC CGCGAACATT TTCGAAAAAA
1321 ATGCGAGCAG AACATAAAAA ACGAGTAAAG TTAGGCTGTC AAGAAGAAAG TCTGTTTTAT
1381 TCATCAAATC CTCGCTCGAC ATTCACCTAC ACTCTTACTT TTAATGCAG

```

//

LOCUS 4 1335 bp DNA linear PLN 25-FEB-2004  
 ACCESSION 4  
 VERSION GeneMark.hmm v3.0 self\_training  
 ORGANISM C.elegans  
 FEATURES CHR ---  
 CDS complement(join(500..671,723..835))  
 /translation="MNVTLVFLLLFVCFISIHAAQQQWSPQQLAAYRQQYYNWWYNQQ  
 RMQQQIQSVQAIQQAQTPSPFFGNSQSDSKGNYWHGDDNAKLLLIARSSWP"

ORIGIN

|      |            |            |             |            |            |            |
|------|------------|------------|-------------|------------|------------|------------|
| 1    | GATCAACTTC | AAATAAATCT | GTAAGCTTT   | GGATAAAATT | TCTTGAACAA | CGTTTCTGTT |
| 61   | TCCTCTTTCT | TGAACATACA | ATATATGTTA  | CCCTGGAGAT | CATAAGTTAA | AGTGAGCCAC |
| 121  | AAGGTTTCAA | AAGGAGGGTG | TAAGGTTTTG  | TTCACGAAGA | GAAATTGACC | ACACCGCTTG |
| 181  | TTGACTTAAA | TGTGGAACAC | GGCAAGTGGA  | AAATTAATTT | AAAACCATTT | CTGTAATGCT |
| 241  | AAAAGGGCTA | ATTATAATTT | GCCATTTGGT  | TTGGTAATTT | CAGCACTATA | GGAATTGTGT |
| 301  | TTAATCATT  | TTCCACGTAC | GCATTCTTGA  | AACAAGCAAA | CAACCTTTTC | AACTATTTTA |
| 361  | TTTGTGTAAG | AAATTATTCT | AATCATTTCA  | ATAAAATTTG | TTGTCATTAC | TTTTAAATTG |
| 421  | TAAAACATAA | TTCATTGAAT | ATATTTGTAA  | ACTAATTTCA | TCGACTTAAA | AGAATAAATT |
| 481  | ACAACACGAA | AAGCAACATT | CATGGCCAAG  | AGGATCTTGC | TATCAATAGA | AGTTTGGCAT |
| 541  | TATCATCACC | ATGCCAATAA | TTTCCTTTGC  | TATCGGATTG | TGAATTCCCG | AAAAATGGAC |
| 601  | TTGGAGTCTG | TGCTTGTTGA | ATAGCTTGAA  | CTGACTGAAT | TTGCTGTTGC | ATACGTTGTT |
| 661  | GATTGTACCA | CCTGGAAACA | ATTTCTTGAA  | ACAAAATGAA | ACAATTAGCA | GTCATATTGT |
| 721  | ACCAATTATA | ATATTGCTGC | CGATAGGCTG  | CCAGTTGCTG | TGGACTCCAC | TGTTGCTGGG |
| 781  | CATGTATAGA | AATAAAGCAG | ACAAATAATA  | AGAGGAAAAC | TAAAGTCACA | TTCATAGTTT |
| 841  | TTTTTTGGAT | GAAAAATGGT | TACAAATGAT  | GTATTTTTAT | ACTGATCAAA | AAGAGGCGTA |
| 901  | CCTGTAAACT | ACAGGTGAAG | TTAAAAAAGT  | TTCACCAAAC | AACAATGCAA | ACCAAATGTA |
| 961  | ACGATTAGGG | AATGAATACT | TTATTCTAAT  | ACTCAATACT | CAAATGGTCA | GTTGTTTTGA |
| 1021 | TTGTGCACCG | TCATATACCG | CATGGAAATT  | AAAATCTCGA | AAATGAATTT | GAAAAGTACT |
| 1081 | GCATTTTGCA | CAAATTAGCT | GAAAAGAACC  | TTCACATTAA | CTTTTAAAAA | AACTTCTAAA |
| 1141 | GATTCTTGAA | TTTCAAAACT | TTCAGTTAGG  | TGAATGTTGT | GCACTACGTT | CAAGTTGAAA |
| 1201 | ATGTTTGT   | TTAGACTTTT | ATTA AAAACG | ATAAGTTTAA | CGGAAATGTT | TTTTTTTCAA |
| 1261 | AATTATCATT | TGTTTCGGAA | CATGTTTCGT  | TGAAAGCGAC | TTGTTCTTAT | TATACAATTT |
| 1321 | TTTAGTATCC | TACCA      |             |            |            |            |

//

LOCUS 5 2164 bp DNA linear PLN 25-FEB-2004  
 ACCESSION 5  
 VERSION GeneMark.hmm v3.0 self\_training  
 ORGANISM C.elegans  
 FEATURES CHR ---  
 CDS join(500..548,1215..1327,1533..1664)  
 /translation="MVVSLTIKRLLSSTVDGSAHLVCVYDANHNGDDLTVTISCPLAS  
 GCCEKGCKLPIQHIRHKEHEPDFVYHAYRPPQPKVSKNPPTVILTDIRNMTLE"

ORIGIN

|     |             |             |              |             |             |            |
|-----|-------------|-------------|--------------|-------------|-------------|------------|
| 1   | CCATGATTAT  | CCTTGTGGCA  | TTTTCGGAGA   | TTTCCCAAAA  | ATTTTCATAGC | CGGCAATTTA |
| 61  | GGAAATTTTCG | GATTGTTGCG  | CACGTTAGAA   | GTGTTAGAAA  | TTGTAACTGT  | ATAATTCCTG |
| 121 | AATAGATAAT  | TGATGCGCTT  | GTTCTCGAAA   | AGCATGCAAA  | AGTAAATAAA  | TTATCAGTAA |
| 181 | GGTCAGTTTT  | TTTGGTTTTT  | AAAGTATCAT   | GTCGCATTAA  | AAAAAACTTT  | TAAATAGACA |
| 241 | AAGTCCGTTT  | TTTTTAAACA  | ATTTCTGTTT   | CATAGATTTA  | CCAAAATACG  | ACGAAAAAAG |
| 301 | TCAACAGTTT  | TGTTTCCAAA  | TGTACATAAA   | TTCATTCGTG  | CGATCAAATG  | ACACATGTGC |
| 361 | GAAACGCAAT  | GTGAACAGAT  | CGTGA AAAACG | GTCGACAAAAC | AGGAGGAGGA  | TTCGGATATC |
| 421 | TTTTAGGTCA  | TTGTTACACAC | CTCTGCTCAA   | TCCCCCTCGA  | AATCTACCAA  | TCTACTTCAT |
| 481 | TTTCTTCGTG  | TTCTGACATA  | TGGTCGTTTT   | TTTGACCATC  | AAGAGATTGC  | TGTCTTCGAC |
| 541 | TGTGGATGGT  | TAGTTTTTTT  | AATGGATGAA   | AACTGGAAAA  | AATTGTAAAA  | TCAGCAAAAA |
| 601 | CGACTGAAAT  | TAATTGTTTT  | TTGAATTGCC   | GCGCAAATGA  | CTTTACGCGG  | GAGCTCTGCT |
| 661 | GAAACTTCGT  | TATAATTTGC  | GAGCAATTCA   | CTTATAAATT  | TTCAAGATTT  | TTCCAACACG |
| 721 | GTATACGCAA  | TTTTCCGATT  | TGTTATACCA   | CTGTAAGTAC  | ATAAATATGT  | ACTATAGTTT |

```

781 TCAGTAATAT CCCAACACCC AGAGCTCCTT CTTTAAACAT TTCAAACCAT CATTCTAAAA
841 CTGTTTCTAA TTTGGCACAA CTTCTACAAA ACCTAATTCC AATAATATCG CATTTCCTCCG
901 TCTTTTTTTC AAGTTTTTTC TTTGTCAAATT TTTAAATATA TATTTCCGAA AATTGATCGC
961 TTCAATGGTT ACGGCCAGCA AGTTTAGAGA TTAAAGTGTA ATGCAATGGT AACTATATCA
1021 TTCTAGTTTG TTATTTTCTA AATTTTCATT CTAAACTTTC CCAATGACAA AAATCATGTT
1081 TTTTGATTTG TCTTGTGAGA AAAGTATTTT CAAATTATGC TGCATGTTCC TGGGAAAATT
1141 AAAACTTTAA ATTCCCACGA AAAGCATTTA AAAAGTATCA AAAACAATT TTTAAAAAGT
1201 TTCCCACCTT CCAGGCTCAG CACATCTTTG TGTCTACGAC GCAAATCACA ACGGAGACGA
1261 TCTAACAGTC ACAATCTCAT GTCCTCTGGC TTCTGGTTGT TGTGAGAAAG GTTGCTGTAA
1321 ACTTCCAGTC AGCTTTTATCA CAAATAGTCA CATGAATACT TCATCATTGT CCGAGGAACC
1381 AATATCAAAC ACCAGCCAAT TCAATGAGAC TATCTTGTTA ATCACATTGA CTCTTATGAT
1441 ATTTTTCTTT GGATGCATTT CCATTTTGTT CATTTTTCAGA AAGGCAAGAT ATTTTTTATA
1501 GACTCAACGT TCAACATTAT GTCTTTTTTC AGATTCAGCA CATCCGTCAT AAAGAGCAGC
1561 AGCCAGATTT TGTGTACCAC GCGTACCGTC CACCACAACC AAAAGTAAGT AAGAATCCGC
1621 CGACAGTAAT TCTAACCGAC TACCGAAATA TGACCCTTGA ATGACATGTT CCCTTCACAC
1681 ACACACACAC ACACATTTTG TTGCCTCACT TTCCAATTCA GATTCTAATA AATTTTTTGT
1741 TTAAATTTAA AAAAGAAATC AACAAGGGTA GTATTCCAGA TGATGATTCC CCATAATCTG
1801 TATGGATCGC CTTGCTGAAT TCGAAAAGAT ATTGAAAGCT ATTGTAATAA AATAAATAAA
1861 TAATTATTGA ATGTTCTTCT AAAGTTTAAAT GAACTATTTT TGGTTGATCA ATACACACAC
1921 AGACATATTA AAATAAATAA GTTTATTCAT CGATCAGAAT TCAGGGTGAT AACTGATATC
1981 AGCGTGTATT GATAAGAAAG TCATGTGAAA TCAAATTGC TTCCAAAAGT TTTTAGTTGT
2041 CAACGTGGTA TTGCTCGTAG AACATGAGCC ACTCGTCGTT TTCTTTCTTC CAAATGTGCA
2101 TCACTTCTCC ACGAAGGATC ACCTCTTTTC CTTCAACTTT CACCAATTCC ATTTTTGCCT
2161 CGAC

```

//

```

LOCUS           6       1900 bp       DNA       linear PLN 25-FEB-2004
ACCESSION      6
VERSION        GeneMark.hmm v3.0 self_training
ORGANISM       C.elegans
FEATURES
  CDS           CHR ---
                complement(join(500..724,1326..1400))
                /translation="MGFFSHAAMLGVGWIGKSYCFRYKIHQLPTDPPDASEISFRIE
                RKEGAGPFFGHPWWNHHHQCWYHHRTEENTVNSQNAPSQVIPKKNVELLEVETNQ"
ORIGIN
  1 TAATTAATTT GAAGCATTGA AATATTTAAA TAGTCGTGTG AATGAATAAA TTATTATGGT
  61 TTAAGATACT TGTTGATGTA GATAAGTTTT TATAAATTTT TGATTGTGAG GTGTCCGAAG
  121 GCAGAAAATT TGGGTCCTGA AACGAACGAG GCTTTTCAGC AACAGTACCC CTTCATAAAT
  181 TGGGTCTAGT TAGCAAAGTT TTTAGTAGAT TTCAGGCAGT CATTCTCAC TATTTTTCTA
  241 TTGTTTTTAT TTATTTTCAT GTCAAAATTT ACATTTTACG CGTTGTTAAG AATTTTCCAA
  301 TAAGAAGTTT TCATATGTAT TGAAAATTAT GAAAAATCAA GAGTACGGTG GGAAACGGTA
  361 TCTGAAAAAT TTCGCTTAAT TCTAAAATTG TTCAGAAACA ATTTGTTCTC TGATACGTGA
  421 GAGAAACAGA ATATTCAAAC CAAATTTATT TCAATTTTCG GGAAAAAATA TTATTTACAA
  481 AATCTTAATC TTCTTCGTTT TATTGATTGG TTTCCACTTC CAAAAGTTCC ACATTCTTCT
  541 TCGGAATCAC TTGAGATGGC GCATTCTGAC TATTTACAGT ATTCTCAGTC CTATGATGAT
  601 ATTGATGCCA AACTGATGA TGATGATTCC ACCATGGATG TCCGAAAAAT GGACCAGCAC
  661 CTTCTTTTCG TTCAATGCGG AATGAAATTT CAGATGCATC CGGGTCGGTG GGAAGTTGGT
  721 GAATCTGGAA ATATTTGGAT GTTTTATTAT CTAAATGTGA TATTATGTGA CTGTTTCCTT
  781 GCTGGGTCTC AACACGACAG AGATTTCTGC AATTTATAAA AGATGTGCGC TTTTAAGGAG
  841 TACTGTAATA TTAAACTTTC GTTGCTGCGG AATTTTCATC GATTTATCAT ATTTTTTCT
  901 CACGATTTGG TGAAAAATAT GTTTTTTTTT TAATTTTTTAA TTGTAGTGTT TCAAAAAATA
  961 AATATTTTTG AAAAATGCTG GCAACAAAAA AAGTTTGAAG CTACAGTACT CTTTAAAGGC
  1021 GCAGGCCTGT TTGTATTTAA CAAAAGTTGT CGTGTCTGTT CCAGGTACTG TATTTTAGCG
  1081 CAAAATTCAT AAATTTTCGC GACTGTGCAA TAAATAGTGT CTTTCCGAAA CTCAGTTTGG
  1141 CCCAAATTTT GGCCTTTAAA GGTACAGTAG TTTATCTTTT CATTAATTTT TTTGTGAAAA
  1201 AAATACAGCA AAATAAGAAA ATCAAAGAAA ATTCCAAAAA AGAAAAGTAC TGTGTTTTTT

```

```

1261 AAAGGCACAC TCTCCTTTTC TCAACTCCCT AGAAATTTTG GGTCGTGCCG AGACCTAAAA
1321 CTGACCTTAT ACCGGAAACA ATACGATTTT CCAATCCAAT AGCCAACACC AAGCATTGCA
1381 GCATGAGAGA AGAAGCCCAT TGTTTTTCAA AATTTGAATA GTATCAAGAA TAAATATTAA
1441 TAATTCCTAA TTTTCCATTC CGATTCTCTC TGTTTTTATA GTGTGTACAA AAGGGGTGGG
1501 GCGTCCTGGC CGCGATTGCG AAATATTTTG CATCACGAAA AGTGTGTGAG AGTGGAGTTT
1561 GTGTTGCTGG GATCAAAATG TGACGTTTAT TGAAACGAAT AAGTTACAGG ATTTTAATAA
1621 ACAAAGTCA AAAGTAGAAA ATTGACAATT AATAAAATAT TTTTTTTTAA TGAAAATCGG
1681 GAAAATTCAG GAAACGATGA TTTTAGTCGT TGTACTGGCG GCGGCGATCT GAAAATTGAT
1741 TTTTATTGGT TTAATATTGG AGTTTCATGA CTAAAAATAT CAGTTTTTGA AAAATTTTTG
1801 ATTTTTCGCC TACTACTTTG AGTCCTGGCA CGAGAGAAAAG TTTTCAGCTA CCGTACTCGT
1861 AAAACCACGG TACCTGGTCT CGACACAAAA ATATTATGTT

```

//

```

LOCUS          7      1305 bp      DNA      linear PLN 25-FEB-2004
ACCESSION     7
VERSION       GeneMark.hmm v3.0 self_training
ORGANISM      C.elegans
FEATURES      CHR ---
              CDS      500..805
              /translation="MLSAVASTSSLIQFTTTNSSSSPLVSRRKISEISNPTETLYRK
              WSHLGTPPRSSTMIAGSQHHGLMQRGGPLQSTLSMSAKDRARKFSEKIASWVSMISIC
              E"

```

ORIGIN

```

  1 TTTAAAAATC TAAAAATCTC GCCGTCCATC GACTTTATAA TACCTAAATC GAGTTGAAAA
 61 CGCAAGATAA TTACTACTGTA TACTCAAAAT TAGACGGTAA TTTCAAAAAA AAAATTGTTT
121 CCAGCCGCTT GACGAGTCGG TAAAATTTCC AGTTTTAGCT AATTTTAGGT CATTTTTTGA
181 GCCGTCAATA CTTTTTTTTG AGAAGTTTTT AATAAGTTTC GTTATGAAAT TCGGCGTTTT
241 CAGACAATTT TGAGTCTAAT CAAGCAATAA AAAGAAATTC GACTACACCA CCTTTAATCC
301 GAAAGTGATG TTTCTCGATT AGTTTTTCCA TGGCTTCCCA CCTCGATGAC GTCAGTCGAA
361 TATAGTAGTT GTTTTGTGTG TTATCGCATA ACATTGCATT TTTTCTTGCT GAACATTTAT
421 TTTTTCGGCA ACTATTCCTC TTAACHTTCT CGTTTCCCTC TTCAACAATT CCACTTCCAG
481 ACGACTTCAT TTAAAAAATA TGCTATCGGC GGTCGCATCA ACCTCGTCTC TTATCCAATT
541 TACCACCACA AACTCTTCCT CTTCGCCGCT AGTCTCGCGA CGAAAAATCA GTGAAATATC
601 AAATCCGACG GAGACGCTCT ATCGAAAATG GTCGCATCTT GGAACACCGC CACGGAGCTC
661 CACAATGATT GCCGGGAGCC AACATCATGG ATTGATGCAA CGTGGTGGAC CACTTCAATC
721 GACGTTATCA ATGTCGGCGA AGGATCGGGC GCGAAAGTTC TCCGAGAAAA TCGCCTCGTG
781 GGTTAGCATG AGCATTGTG AGTGATTATT ATCTATCACA ATATGCATAT ATGTAGATGC
841 CGAAAATATA CGGTAAAACG TAATTATTAT TTGAAAATGG TATAATACAA CATATCAGTT
901 TTAACGCCCC ATTTATCCCA GAACTCACGT GGTGTCAGGC TGTCCAATA CAGTCTGATC
961 TACAAAAAAT GCGGGATTTT TTTCCCAAAA AAATTGTGAC GTCAGCACAC TCTTAACCAT
1021 GCGAAATCAG TTGAGATGTC TGCGTCTCAC CTCCCGCGTT TTTCGAAGAT CAAAGCGGAA
1081 TGTGGGACTT TCTGACTCCA CGTGAGAACT GGAATGTTAA GTCGACCTAC AAATAATGTA
1141 CCATTGGCAA ATGTTATTAA TTGGGTATCT AGTGATATCT AGTATTGCAT ATACTACATT
1201 ATGCACCCAA ATACACTATT GAAAATACCT ACAA AAAATG TATCATTGGA AAACGGCATC
1261 GAATTGGTAT ATACCGTATA TTCTCGATT TTATTCCGAA TCTAT

```

//

```

LOCUS          8      1887 bp      DNA      linear PLN 25-FEB-2004
ACCESSION     8
VERSION       GeneMark.hmm v3.0 self_training
ORGANISM      C.elegans
FEATURES      CHR ---
              CDS      complement(join(500..750,1330..1387))
              /translation="MVCPSVALSVLFTILVANSLRCEATSVVTCMLCTVVSESLER
              EMTPTATVNSMFKKCDKMGLMEPVCVQFVSENVKEMFQVRVQGIPTSVQCQLRFCD

```

LQ"

ORIGIN

```

1 AATGGAAAGA GTGGAGAAGC AAAGATCAAC AAGAAGGATC CATTGGAAGA TTTGGAGCTG
61 GAAGATTTGG AAAAACTATC AAAATCTGAT GACACAAAAT CTGGAACTTC TGAGGCAGTC
121 ACTTCTGATG ATGTTGATGT TGAACCAACT GAGATTAATAA AATCAAAGTT AGGAGATGAT
181 GAGGACCTGA TTGACGATCG AAAAAAAAAA GCAAAAAGAA ACTTCCTCGT CAAGTGGGCT
241 TAATTAACTA AGAATTTTAC TATTTTTGTT AAAATTATTA TTTATTTTTT GTTATTGAGG
301 ATCTCAGGGA TAATTGACAA TTTGCTGCAA TTCGAATTCT CTGCAATATT GTAAATAAAT
361 ATTTTTTCAC TTTTAAAAAC GGCCGACAAC AATGAAAACG TATGTTTCCA CTTCATATAA
421 CCACAGAAAC GATATGCACG ACATCAAATA AACATTTCAA ATGACTTTAT TACAAAATGC
481 ATTTCTTCCA CTCAAAGGAT TACTGTAGGT CACAGAATCG CAACGCCTGA CAGACACTTG
541 TTGATGGAAT ACCTTGTCGA ACACGTTGAA ACATTTCTTT CACATTCTCG GACACGAATT
601 GCACACAAAC AGGCTCCATG AGTCCCATTT TATCGCACTT TTTGAACATT GAATTAAC TG
661 TTGCAGTAGG TGTCATCTCT CTTTCAAGAG ACTCACTGAC AACTGTGCAC AACATGCATG
721 TCACCACGGA AGTTGCTTCA CAACGAAGTG CTGAACAGAG TATTGTTATT AATTGGTACT
781 GATCAAGCTT AAGCCTTTTC TAAAACGAC TGGGAAACAT CTAAAACCTA GTGAATCATA
841 AATTATCATC ACCTTCCGTT CCAGGTGCCG ACCTACTTTC GGTTTCAATC GTTATCTCCG
901 ATTATCTTTT GCCATCCGAA AGATAAATGC CAGTTGCATA TACACAAAGA AAAGTGAAAG
961 AACGTTTATA AAGACGATAG CTTCTCATAT TTCTGGTAGG CGAGGAGAGG AAGTTTTTGA
1021 AATTGACTCT TTTGGCTTTT TTGTAGTCAA ACAGAGCGTG CTGCAGCTTG TGAATCATCA
1081 CAATACTTGA GCCATTTGGT TTGACACCAC ACTTCACAAA ACCAAAGTCA CAAATCATAG
1141 AAGTTGAGGG AAATCTTTCT ATTCGATGGC TTTCAGATCT AGTCTTAAAT AGCGACAATA
1201 TTTGTTCAAA AAGAAACAGA ATCGTTTCGAA ATTCTGATAT TTATCTTAAA TCAAAGCGTT
1261 ATTTGGCTTT TTTTTTTAAA GATCTCTATT AACAGAAACA CCACGATGAC GCGTGAGTTT
1321 ATAACCTACA ATTGGCAACA AGAATAGTGA ATAAAACGTA CAAGGCTACA CTTGACGGGC
1381 AGACCATCTC GGAAGACGAC GAAACGGACA GAATGATCTA GAAGAGTCTC GTCTGCGGGA
1441 TTTGACTTCA GCGTCGTCAT CCCTTCCGGA ACCTCCATAT CAAATAGCAC CGTTTCTCGC
1501 TTCTCCGCCT CCCCAGGCAC TATTATGAGC TGTTGTGTGT GTGCAAGCTC ACATCATAA
1561 AGAAATCTCG AATTCCCACT AATAATAGAC AATGAGACTG ATGTTTTGAT TGAGTTGAGA
1621 TCGTTTGATT AGTCAGAATA GACGGAAATT GGATGGACCA ACAGAAAAAG AGAGGAACGC
1681 GAATCGAAAA ATATAACTGT GGAAATCGGC AAAAAAAAAA AATGATAACA AAAGGGAAAA
1741 GCGCGTGGCA TATTCTTCCA ACAAATATG TGTTTTTTTG GCGACCGACT GTGCAACTCT
1801 CTCATCATTT ATATTCTACA CAAAATAAT TCGGAATATC CAAAACATG CATAAAGTCG
1861 CGGAAATGTT ACGAATGTCA ATCCGAA

```

//

```

LOCUS          9      2327 bp      DNA      linear PLN 25-FEB-2004
ACCESSION      9
VERSION        GeneMark.hmm v3.0 self_training
ORGANISM       C.elegans
FEATURES
  CDS           CHR ---
                complement(join(500..638,794..876,1711..1827))
                /translation="MQYICLVSAFLVFLVLSRGIPTIPQPRIDVWSGPNCHMCEVILN
                NVRYEYRNNFTNVTPDQLRQSLYQQCDLNLNGFTDQECHKIAEDSADILQQLQEGT
                SSYRICQRELLC"

```

ORIGIN

```

1 ACATAATTTA ATTAAAAC TA AAAAGTAAGT TTGAAAATCG AGAACAAAAA AATAATCAAA
61 ACGTCATTTG AAATCGTTTG ACAAGAGGAA ACAAATGATT TTTTGTCTTT TTTGTGTAAC
121 ATTTACAGAG GAAAGATGTC TTGGCAAACA TCGGCGGGAG ATTCAAAGAA ACACATGGCA
181 GGGAAGAAAA ATACTTTTTG GAACTTTTTT TCTTGAAAAA ATCTGAAAAT TTTCTTCATC
241 GAGTTGGGTG AAATAGTATT CAGAAATAAT ATAACCTTAA TAAAATGTTC TTCAAAAAGC
301 TTCTAGATTG TTTGCCTACC TCTAAACAGT CTGAAAATCA TCAAAAAGTAC TTAGAACTT
361 TTTTCTGAAA ATAAAATGTT TCAACAACCC TGTCATCAG TAAACAAGCA GTGTTTCAAG
421 AAGAACAACA CCATGAAAAT TATATTTGAA TATTTAAATT CAATGAGTAT AAAGACATTA
481 GATAACAAG ATAAAATTT CAGCATAAAA GTTCTCTTTG ACAAATTCGA TATGAAGATG
541 TTCCTTCTTG AAGTTGTTGA AGTATATCAG CAGAATCTTC ATCCGCAATT TTGTGACATT

```

```

601 CTTGATCAGT GAAGCCGTTT AAATTTAAAT CACATTGTCT GAAAATTGTT TGTGTTGGGA
661 AGGCAGTTGT GGTTCGGAAGG TAATGAGCCG GAACTTTGAT AAAATATCGG GTACATATGA
721 CTGTTCAAGA AATGATAAAA TAATTAAGT GACGAAGAAA TATGAGAATA GACCAAAATG
781 TGTTAGTACT TACTGGTAAA GAGATTGCCG AAGTTGGTCA GGAGTTACAT TTGTGAAATT
841 GTTACGATAC TCATATCGGA CATTATTAAG GATTACCTGA AATCGGAAGA AAATTTAGAT
901 TCCTATTAGG TTTTTTGTG GAATTATTAT AATAATCGCA TTCAATTTCT AAAAAACAG
961 GTGTTGAAAT GTTGAAATGT TGAAAATTTG CAACAAAAAA TATTCCAAAA GTTGTCTTA
1021 GAAACTTGCA AATTATTGAA AAACCTTACAT CAGCTTCTGT AACTGACGGA AGAACTCAAT
1081 TTTGAAGCAA AAGTTGGGTT CTTTTTTTGA GATTTTTTCT AAACCTTTGA ACTTGTGCT
1141 ATTAGGACGT ACAGAACCCC GTCTTTGTTT ATTTCTAAAA ATCTGATTTT TTCGGCATAT
1201 ATTTCAAAA CGAGCATTAT TGGAAATGTC TCCAAACGTT TTTCTAAGT TATTATATGT
1261 TTAGGATGTT TTGTGAACCT GCGAACAAC TGGAGTGTTT TCAAGAACCT TTATACAAAA
1321 AAAAGAAAAA TTCCACAAGT CTTCCAGATT GTTTGGGTAC CTCAAGACAT TTCAAAAAAT
1381 TATAAGTCTG CATTGTCGGC ATTTGTAGAT TTTGCAAAAA TCCACCTTCT CGAACAACTT
1441 TACTGGCCGC GAAAATAGCA AAAAAGTTGT TTTAAAAAAT AAATACAGAT CAAGCTGTTT
1501 TCTAATTTAA AATGCCCGTC TGTAGTTAAT TTTTTTTTGT AAAAACCTAT ATACGTTATT
1561 TTTTTCAAAT GGCATAAATG TTATTTGGAA GTACAAAAGT GAGCTTAACA CTTTCTTCAA
1621 AAAAAGCTGA ACAAATTATT TTTTAACTTA TCAACTTCCC ATATTTTCTT TAAAAAAAC
1681 AACCGAGACC GAAATATAAA ATTTGCTCAC CTCACACATA TGACAATTAG GTCCTGACCA
1741 TACATCAATT CTTGGTTGTG GAATTGTAGG AATACCTCGA CTCAAACAA GAACAAAAG
1801 AGCCGAAACA AGACAAATGT ACTGCATGAC ACTGCCCAA AAAGTATTG GTTTTCTTCA
1861 TTTTGTTCCT TCTTCAGTAG CTGCTGCCCC TTGTCAATTT GTTGACGTCA TCATTTTATC
1921 AGTGGTCGTG AGCTGTAAT TTACTAGACA TTTTCGTGCA CAGCCACATG CTTTTTCAGG
1981 TTTTTCGAGT GGAACGATCT AAATGGTTTT TGATATGTAT TTTTATGTAC CTGGTTATTG
2041 CTCTTTGTTT TCAAAAATAA ACTCCTTATT CTAAAATTTT AAATGTTTAT CTTGTTTATT
2101 CAAAAGAACC CTGATAGAGC CTACAATGCA TTGACTGAAT ATATTTTAAAT CATTATGGGT
2161 AATTGGAGTT TGCAGCCGAA TGTTTTGCAC AAAAATCAGT TTGTTTCGGC GGAGCCATGT
2221 AAGCCCCTCT ACTGCTCTTG AACATTTGTA AAATATTCAG AAATTTCAGA AAAGCGATT
2281 AAAACGAGGT GGAGTCATCC ATAACATCCT TAGTTCTGAA TGTATCA

```

//

```

LOCUS      10      1867 bp      DNA      linear PLN 25-FEB-2004
ACCESSION  10
VERSION    GeneMark.hmm v3.0 self_training
ORGANISM   C.elegans
FEATURES   CHR ---
           CDS      join(500..551,1081..1367)
           /translation="MFKIIIVLLATILIVTVYGGCPGISSIIYLPRRVNCP LCDFAPFS
           QAVTGSNQYSIKCPAGSDVWYYNEQGREFVTPMSKVGSKGSIKCDGSKWKISVPGQ
           SQTLSAFACGSS"

```

```

ORIGIN
1 ACTAGTAAAA TCGGCAAAAA ACCATAAAAA TTCCCGGTTG TCTCGCCAAT ACCTGACGAG
61 ACCCAACGTT TGGGGGCGGA TCCTTTTCAG TTGTCCGTGT CAGTCTGGAA ACCTATATTG
121 GCTACTATCT CGAAAACCAT CACAAAATCG ATTTTTCGAT GCATATAAGA AATGACCGCA
181 ATGAATATAC CTATCTTTAT TTGTGATGAA TTTTTCGATT TGTGCTTCTT GCCCAAGTTA
241 TGCACGTTTG TTCGGTGGAG TCGTTTTGCA CCCATCTAGC AACTGAACCA CCGTGAAGAAG
301 TGCATTTTTT TACGTCTCAA TAATATTTCC CTTTGTTCAG TCTTTTTTTC CCGTTTCAAT
361 TCAAAAATAA ATCAATCATG ATGAAGGAAG TTTTGTGTGT GGGGCGGGGT GAGCGTTTCGT
421 CGCCGAAAAA AAAACAGCAG TAACGATATT TAAGGCTGAG AATTAGGGTT TGAGTACTGA
481 TAGATAGGTC AGCGGCGAAA TGTTCAAGAT CATTGTTCTA CTGGCTACGA TTCTGATCGT
541 CACTGTCTAT GGTGGGTTTT TTGAGATTAT TGATTTTTCA ACAAAAAAAA ATTTCGAATAA
601 TGTTTAAATCA CCCAATTCAT TAAAAAAAG AAGTGTAAAT GGATTAATGA AAAAATAGGA
661 TTTTTTATAA ATAGTTTTTA AAATTTGACG AATTTTTCTG CTTTTCGCCA GATTATTTGA
721 AAAGTGAATT TTCGTAAGGG GAGTCAGAAT GTCCTATTTG GGTTTTGATC TTCAAAAAAT
781 GCGGGAGAAG AGACGCAGAC TTCTCATCTT ATTTTCGCTG GTTAAGAGCC TACTGACGTC
841 ACAATTTTTT CGGAAAAATA TTCCGCATT TTTTGTTTAT CAAACCGCAA TGAGACAGCC

```

```

901 TGACACCACG TGTTTTCAAA AATATCAATT TTGTACAGGG AATTTGTTTA TTTCCCAAAA
961 AATTAAATTT TTTTTCGAAT TTGCGCGTCA AACATGGTGC ACTGTCGTAG TTCACTGACC
1021 CAATGCATCA AATTTTACGC GCAAATGCGG CCCTAAATGA ATAATTTGAA TAATTTCCAG
1081 GTGGCTGCCG CGGCATTTCC AGCATCTACC TCCCCCGCCG AGTCAATTGT CCCCTCTGCG
1141 ATTTGCTCC ATTTTCTCAA GCTGTAACCG GCTCCGGCAA TCAATATTCG ATAAAATGCC
1201 CCGCTGGCTC TGATGTTTGG TACTACAATG AACAGGGACG TGAATTCGTG ACCCCAATGA
1261 GTAAAGTTGG ATCAAAAGGA AGCATCAAGT GTGATGGATC GAAATGGAAG ATCAGTGTGC
1321 CCGGACAAAG TCAGACACTT TCTGCGTTTG CGTGTGGATC CTCGTAATAA GATATAAATA
1381 ATCCAAAAAT TGTTAGGAAA CTTATCAAAT GAAACTAATA AATACTAGTA CAAATGAATT
1441 ATTATTCACA GAAAAAATA AATAAAAAATA GACAAATCAC AGAAGCTCAT TGGAAATTAT
1501 TTGGTACATT TAAATATTTG TGGAAGCAGA AATTGGAGGA AAAAAATAAA TAATTAATAA
1561 AAACCGTAAA TCAGGCAATA GAAAAATTA AGAAGCTGCT GGCCAATAAT TGTGACTAG
1621 AAAATTAGAA AATACATGAG AAAAAAAAAA TCAATTAATT GTGTTTCGGT CTAAACGAGG
1681 CGTCGGAAAT ATCTGTAATA ATATCGGGAA TATCGATTGA AACGGAACT TCTTCGCTCG
1741 AACGACGGCT GTCTCGTCGT TTTGGTGTCT GTGCCATCGA GTCCGTTCTGA CTCTGAAAAT
1801 TTTGGTTTTT TGTTGAAATT TGGAGGCAGA TACTGTTTTA CTACTTGATC TTTTACTACG
1861 TATCTCT

```

//

```

LOCUS          11      2491 bp      DNA      linear PLN 25-FEB-2004
ACCESSION     11
VERSION       GeneMark.hmm v3.0 self_training
ORGANISM      C.elegans
FEATURES
  CDS          join(500..544,1126..1182,1243..1371,1884..1991)
              /translation="MSIDRARAGTIERRQLHDLVDLREELRDLQANLEHEELRFAD
              AVKERSSIMNKNDQEDSEDEDHFLESLRLTEENIHSRQKILEIQGKIIDKKESILS
              LEILVKLHENDK"

```

```

ORIGIN
1  TTGCCAAAAG TTGCAAATTT AACATTTGTT TCAAGTAAAA TTCCTGTGAC TTTTGAAATT
61  ATTCAGACCG CGACGCGACC GCAACGCAAC TCCTTTTTTT CAGATTTGTA AGTCGGCTCT
121  CGGTGTTTTT TTTGCAATTT TAAAATTTTA AACAAAATA TTTTAAAGTA ATTTTTTCAA
181  AAATTTTTGT ACTAAGAAAA CCACAAAGAT ATATCGAACC TGAAAATTCA AAGAATTTTT
241  TGAACTCTGC CACTTCCCCA TGGTTCCTTG ACATAAAACC CTAACAGAAA AAGGCTTATC
301  CAATATTCAC ATTCACTTTT ATTCGATTCC TCTTCTTTTC TTCCCCTTC TTTTGTCTCC
361  TTTTCGCCTT CCACCTTTCT GCTCCAAGTG TGCTCTTTT TGTGCATTTT CTTGTGCGAA
421  TCAACAACAG CTTAGCTTTT ATGACTAGTC CCACATTGAA AAACAAAACG AAAAACGATT
481  TCCAGATTCA CACGCAGAAA TGTCTATTGA TCGTGCACGT GCTGGAATA TCGAGAGGAG
541  ACAGGTAAAT TTTTGATTTA TTCGATAAAT TGAAATGTTA TTTGAAAAAT ACAATGTCCG
601  TTAACTTTTG GGTAAGCTGG AAAATTTCTGA TGAATTTGGA GCATTTTGAA CTAAATTACA
661  GCCGTTCAA TGTGAGGGG CGCGGCGCGG TCGCGTCGCG GTCAGCTCAA AAATTTGAG
721  CGACTGTAGG TTTGCCCCCA AAATTCGTAT TCGGTTGAAA ATTTTGGGG ATTCTTAAAA
781  TACGATTTTC CATCAAAAAC TGAGTGGCTT GGAATTATTG AAAATCAAAG TTACCTTCGG
841  AATTTTCGGA ATTTTCGGAT TTTTAAAAAA AATTTATTAA CAAGTTATAT GAATTTTAAA
901  TTTTGAATA AAATCATGCT TTGGGTCAGC TGAAAAAATT TCAAAGAATA ATAAGCATT
961  TAAGCAGAAC TACAAGCACC CAAAGTTTGT AGGACGCGGC GCGGTCGCGT CGCGGTCAGC
1021  ACTCAAACCT TTGCGAGATA TAACATTACT CAATGTTGTC GTAGATGTCT GAAAATTTTG
1081  GAGCTAGTGA GCAACTGGTT AAATAACAAA ACTTTTAATT TTCAGCGTCT CCATGACCTT
1141  GTCGACTTGC GGGAGGAGCT GAGAGATCTT CAAGCTAACT TGGTGGGTGC TTCTAGTTTT
1201  CAGTGCTTTT TATAGTATTT CAGTATTTAT TTTATAATTT AGGAACACGA AGAACTACGG
1261  TTTGCGGATG CCGTAAAAGA AAGATCCTCC ATTATGAACA AAAACGACCA GGAAGATTCA
1321  GAGGACGAGG ATCATTTTTT GGAAAGCTTG CGGCTAACTG AAGAAAATAT TGTAAGTTTG
1381  GAAGATGCAC AAAAAAATG CAGAGTTCTA GGATAATTTT GAACAAAGCT ATAAGCTTCC
1441  AAAGTTTTGA CCGTGCACG CGGTGCGGTC GCGGCTAATC TCTCATTTTC AATTACATAT
1501  ATCTCAGCTC TCAGTTGTTC AATTGACTTC TAAATTGATA GGCGGTCTAA TCAAGTTGTG
1561  CTCTAGTGGA TTATCAAAA AAAAGCAAAA ATTCGAAGAT TAAAAAATT TCTGTTTAAA

```

```

1621 ATTTAAAAAA AAAGTTGACT CTGCTTATTA AAACCTAGCC GTTTAGAAAG CATTCTAAT
1681 TTCCGGTAAA ATCATCAAAT TTTAAAATTC TAAAATTTTT TGAGCAAAGT TAAAGGCTCC
1741 TAATGTTCAA AGCGTGCCTC GCGGTGCGCT CGCGGCGGCA GTCAAATCTT GGCTCCTATT
1801 GAAGCTAGCA CGCTAAATAT TTTTTTGGCG ACTGGGAGCT TAATTTCTT TTAATATCG
1861 ATATTAATAT CTAAATATTA CAGCACTCCC ATCGTCAGAA GATTCTGGAA ATCCAAGGGA
1921 AGATAATCGA CAAAAAGGAG AGCATTTTAA GCCTTGAGAT TCTAGTGAAG CTTCACGAAA
1981 ATGATAAATA ATTATCGGGT TTTTTTTCGT TCTTGATTTT TCGCACCTAA AATTAATTTG
2041 TTGGTTTTTT GTCCTCGCTA GAAATAAAAC AAAAAATCCA AAACACCAAT TTACCCGGTT
2101 CCAAAGGGAA AATACTAGTG CAATCTCTAG AGAAAACTGG TATATTTACA GAAAAAATTC
2161 AGTTCTTCTT TTTCTGTTAGT TTTTGCTCTT AAAATGTAAC GGTTTTGTCT AGAAGCTTTA
2221 AAACTTAAT ATCTTAAAC CAATAACTTT TGTCAAAATT TGCTAACTAT CAAATTAATC
2281 TACGCAACAT TTCCTATATT TTGTTAGTTG ACAACTTTTT TCTAGCTATT TTCCCGGAGG
2341 AGTTACGGGG ATTCAACGGT GGCAAGGTAA GAGAGTGTGG GAGAGAGAGA GAGAGAGAGA
2401 CTCAGACAGC GTGCGCACTC TCCCCACCTG CGTCTCTCTC CTCTCGCCGT GATACTTTTA
2461 AACGCATATA ACTTAGTGTA GGAGAACGCT G

```

//

```

LOCUS      12      4431 bp      DNA      linear PLN 25-FEB-2004
ACCESSION  12
VERSION    GeneMark.hmm v3.0 self_training
ORGANISM   C.elegans
FEATURES   CHR ---
           CDS      join(500..622,3660..3720,3771..3931)
                    /translation="MKLLILQLTLFQLNSIFAQDNAADLEFSPYVFKHVDIPFKNNN
                    YAKDWFSGSDVALVQHPLLPAPAKSVKPGNPVSLPTIAPLIVKWSDLNNAVKVNQIGQN
                    FEKRIDSHVWVWPNK"

```

ORIGIN

```

1  AAAAAATTATT TTCAATAACT ATTA AAAAATT TGAAACATTA ATCTATGTCT TTAAATGTTA
61  GCCAACAAATT TTTTGAAAAA CGGCTAAAAA TTAAAAAATA ACTGTTTCAG ATTATTAGTA
121 AGTTCATTAT GTTAAGAAAA CTTTTCATTG TGTTAAGAAA ACCCTCGACT TTTCTATTTA
181 CTTTCTCAA TCTTCATTTT TGAAAATTCA TTTTGTGAAA AGTTTTTTAA ATAGCACTTT
241 TCAGTTTTCT TCAACGTATT TTAACAACT CGCTGTGCAC TACTAATAGG GGATGACCAA
301 ATCTTCAAAA TAATTCCAAT TTCCCATAGC ATGTTGCCCA ATGATAAATG TATACCTAAA
361 CAGGTTTCCT GTTTCACATT TATCTTATTA CACTGTTTAC TTCTGTTTCT GCCCCTGTGA
421 TCAACATCAC ACAAAAAAGT TATTTCTCAG AAAAATATTA TTTTCTGTG TCATAATCTT
481 CATATATTTG TGTCTAAATA TGAAATTACT GATTCTCCAG TTGACTCTAT TTCAACTCAA
541 TTCAATTTTT GCACAAGACA ATGCGGCGGA CTTGGAATTC TCCCCGTATG TGTTCAAACA
601 CGTGGATATT CCATTTAAAA ATGTTAGTTT GCATCGGTTT CGTTACCGAT TTAAATAGTA
661 AAAGTCGAGG GCCCCGAAA ATGTCGGGCA TTGTGAAATA TTATTTTTTA GTCTTCAATG
721 GCCAATTGAG ACCAATTGAG TAATTTTTCT TAACATAATG AACTTACTAA TAATCTGAAA
781 CAGTTTTTTT TTTTAATTTT TAGCCGTTTT TCAAAAAATT GTTGCTATC ATTTAAAGAC
841 ATAGATTAAT GTTTCAAATT TTTAATAGTT ATTGAAAATA ATTTTTTCCA AATATTTTGA
901 AGTGCGAATA TGTGTAGTAC AACACTGAAT GCACCAAAAA ATTGCAGTAT TTCAAATTTT
961 GAATTTTGAA AAAATTTTGA AATTATAACA TTCTCAATAC ATTTTATCTG TTTTCAAGTAAG
1021 TTTTAAACCA CGCACTAATT TTTTTCGATA TAGTTTTCTG TTCATGGAGA CAATTTTGAA
1081 AATCAAAAAA ATCGTTGACA AAAAGTTATT GTAAGCTTCG ATGGAAAAGT ATTTTCTATT
1141 TTTTTTCTA AAAATAAATT TTTTCAAGTTG AAAAAATTAG TATGAATTTT ATGGACATAT
1201 TGATTGAATT CAGACAAAAT TAAAATTAAT AACTAATTTT CATGAAACAG TAATTTTTTTT
1261 TAATTGAAAA ATGAATTTTT AACAATACGA AGCTGTTTGA TTTAGTTTAT TTTTGAATA
1321 GTTTGATGTC CTGATAGTTA ATTTTATTTT CGGAGGGAAA TCTATTTGCA TTCACAAAAT
1381 TTGACTATTT CAAACCATTT TTAATTGAC AGCAAAATTT CTAAAGATAG TGATTGTTTG
1441 GCCACAACAT TTCATATAAA AAAATTAAT TTTAAATTA TGACAGGAAA ATATATATGT
1501 TTCCAGAAAT TTGAAAATTG ATTTTTTAAA GAAAAAATT AATTTGAAAT AAAATTTGTA
1561 TTTTCTTATT TTAACCACAA GAAATAAAAA AACCGCTTGT TCAGACATAT TTCATGTACA
1621 TGTGAAGCTA CAAATTGCTA ATTTTTTTT GGTTCGTCC GTTCTATAAT AATAAATAAA
1681 AAATAGAAAT CCTTCTTCAA CTAATGGAAA TAGTGAAACT GAATTTTTTTT TTTGCAAAAA

```



```

1741 AAAGTTGATC TCACCACACA TAACTTTTTA CGGAGATTTT AAAATGCAAG TTCCACACAA
1801 ATTTAAACAC TGAAAATTCC TGCAACAACA ATAAATATTA TAATGACTAC AGTACTCTTT
1861 AAAGGCACAC GTATTTTTGG ACCTGAAGAA ACGCGAATCG TAGTGTTTTT TTTTCAAAC
1921 CTTGAGAATT AATCACAGTT TTGAAACAGT AATTTTTTGA TTTAAAAAAT CCGAAAAAAT
1981 TTCCTGTTTT AAACAGCTGC CAAAATCAAA AAACTTTCAA ATAATTATTA TCATCTAGTC
2041 ATTGATTCAT CGATTTTGTT AATAAGCTTT CCATTGTTTT CTTTTCAAA TTTTGGCGTT
2101 CGAAAGTGAA AAATCTTTTT TCTTAAAAAA TGTCTTTGTG ATTTTTATTT TATCATTTTC
2161 GGGTGAGAAA TAATGTTTTT TTAAGCAATG AAACATCTTC CAAAACCTAT TAAAAATGTT
2221 TGAATTCACT GGTTTACCGC CAAATACATA CACATCGAGA CCCGACTGTT GATAACGGGG
2281 GCGTTTTTAA TTGGCCGTGG AGCACATTTG CAATTTTTAA ATTGCAATA TAGCAAGTTT
2341 TTGGGGAACC TAATGTTTTT TCTTTTGAAA TTGGGTAAT TATAAAGAAA TGCATTTCGA
2401 AATGTTAAAA CTATATGTAG TTTCTTTTCG ATTTTTGAAA AAAAAACATC CTGTTTCAAA
2461 AATTTTCAGAA ATTAGTACTC AAAAAAATTT CTATGAGGAT TAATTGTATT TTAGGGCAAA
2521 AATCAGAAAC AATATATTCA ACAAGTTAAA AAGTCCATAA TACTGTTTTT TTTTACAAAC
2581 TTTGAAAATT AATCACAATG TTGAAACAGT GGATTTTTTT TTCAATGAAA AAAATCCAAA
2641 AAAAAATTC TGTTCAAAA AGTTGTCAAA ATCAAAAAAC TTTTCTCTCT CTATTATCTC
2701 ACATCTATTA TCATCAATTC TTGATTTGGT TAATACAGTG CATATTTTCC AACTTCTACG
2761 AAAGGCGCGC GCATTTTCGC GCAATGGTCT CGCCACGCGC ATCCCATTGA TTTGACGGGA
2821 CCATTTTGTA TAAATGCGCG CGCCTTTAAA GTCGTAGAAG TGGAAAAAAA TGCCTGTAA
2881 GTTTTCCATT GTATTTTTTT CAAATTTTGG ACGTTCGAAA GTGAATAATG TTTGTTTAAA
2941 TAATTTGTTT ATTTTATCGA TTTCGAGTGA GAAATAATGT TTATTTTAGC AATGAAACAT
3001 CTTACAAAAT TAATTGAAAA TGTTTGAATT TACTGTAGTA CCTACAAATA CCCATCGAGA
3061 CCCAACTGTT GGGGGCGGGG GCGTTCTCAA ATGGCTGTGG AGCACATTTG CAATTTTTTTA
3121 ATTGCAACAA TAGCATGTTT TTAGGGAACC TAACTGTTTT CTTTTTGAAA TTTGGTTAAT
3181 TATAAAGAAA TGCATTTCGA AATGTTAAAA CAACATGTAG TTTCTTTTCG ATTTTTGAAA
3241 AAAAAATTC TGTTCAAAA ATTTTCAGAAA TTAGTACTCA ATATAAAAAA GACAACAAAT
3301 CGGCAAAAACA AATTGAAAAG TGTTTAAATTT ACTGTTCTGC CGATAGATAC CTAACGAGAC
3361 CCAACTATTG GGAGGCGGAA CGCTTTCAAT TGACCGTGGG GCGCATTTGC ACGTTGAAAA
3421 ATAAAAGAAA AATTCCTCGA ACATGGGAAA TTAATGCCTA CAGTACTTAT TAAAGGCGCA
3481 CACTTTTCCG GAATAAATAT CAAAGGAACT GTTTTCTTTT TAAAATAGGG GAAATTAATA
3541 AGATAGTTGA AACAGTAATT TTTTCTTTT TTTGAAAAAA AAATCCTGTT TCAAACAGAT
3601 CTCAAATTA TATTAATAAT TCTATTACGA TTTTCTTATC AAATTATGTG CCTATTCAGA
3661 ACAACTACGC AAAAGACTGG TTCGGCTCCG ACGTGGCTCT CGTACAACAT CCATTACTAG
3721 GTGAGAAGCT TCATCTCCAG CTTAAAATCC AAATTTCAAA AAATTTCCAG CTCCTGCAAA
3781 ATCAGTAAAG CCAGGAAATC CGGTGTCACT GCCAACAATT GCTCCATTAA TTGTGAAATG
3841 GTCAGATTTG AACAATGTCA AAGTTAATGA ACAAATCGGA CAGAATTTTCG AAAAGAGAAT
3901 TGATTCACAT GTTTGGTGGC CGAATAAGTA GTTGAAATTT CCAATAAAAA TCTTTTGTTT
3961 TAAAATGAAT AGGCAATCAA AGGCAAATAC AAAGAAAAGC ACCTGATCTG TGGGGGAAAT
4021 GTATAAGAAC AGAGCGAGAA ATTTGTACAAG AATGGGTGAG GAGAAGTGTA TTATGTTATA
4081 AGTACACCGG AAACCTGTAG GGAAAAAAAC GGAAAAAAAA GGAAAAAAT AAAATAATTT
4141 AGAAAATAAG GCATCATCAA ACACGATCAT AACACACACA AAACGTCGCG AGATAATAAT
4201 TTTTGTGCAT AATACAATGC GGAGTGTGCG CAACTTGTT CACGTGGCTC ATTGATCCAA
4261 AATCCAGCTT CACCTCATCT CGTACAATAT CGTAGAACAG GGTAACTTCG TAGATCGCTT
4321 CTCCGGGAGT TGTCTGCAGC TTCAGTTGAT AATGAGCGAA TGCGGCTTTC GTGGAACCTG
4381 AGAGGTCAGG CACAAAACCA TCGGCATCTT TCACGTTTTT GTAGGCGAGT A

```

//

```

LOCUS      13      1489 bp      DNA      linear PLN 25-FEB-2004
ACCESSION 13
VERSION    GeneMark.hmm v3.0 self_training
ORGANISM   C.elegans
FEATURES   CHR      ---
            CDS      join(500..576,707..989)
            /translation="MSKHLKQYVRIAGKWPKDAFRAPERDFSNFLVKEIERQFQPG
            VVASQAICEKRLQALEQLLNNEVLKHPNSYSSGVFGMRLADLQAASSESRKQMG
            LQPKVSIFKRLYRSVVPEKK"

```

ORIGIN

```

1 GAATTTTCAT CGAATCCGGA GAATTTTCGCT ACATTTTGAA CGATTTAATG ATTGCCGACT
61 ACATTTTCTG GATTCAAAC TGTGCCGACG AGATTCTGAC GCGAATTCAG ACGGATTTGA
121 CGGAAATTTT GGGAAAAATC GATAAATACG ATATTGGATG GGATTTGGAG GTGTTGGAAG
181 CCGAGGCGAA ACTGGCGAAT ACTCAACTTG ACAGCGATGA TGAGCCCGAT AATTGATATG
241 ATTTTTAGAA AAATCGATAA TTTATCGATT TTTTTTTTCA ATTTTTTTGT TATTTTCTAT
301 TATTACCCAC ATTAATTGAT TTTTCCGCTA AAAAATCGAT AATTTTCAAA TTTTTTCTGT
361 TGTTGCACAC TTTGTTGAAT TCTAAAATAA TTAATCAATT TTTTCTCAA ATATCGATTT
421 TTCGGGTTTC AAGCTCCTCA CTCTACCTTT TTTTCCGAT TCATTGATTT TTCAGCTAGA
481 AAATCCGATA TTCTTACAGA TGTCAAAGCA TCTCTACAAG CAGTACGTCA GAATCGCCGG
541 AAAATGGCCG AAAGACGCAT TTCGGGCGCC GGAAAGGTAG GGTTATACGC GACGCGACCG
601 CAACGCGCGC TTCACTAAAA AATAATCAAT AAAGTATCGA TTTTCCGCT AAATCTTCGC
661 TAAAATCTAC AAATTATCGA TTATTTCCAA AATTGCCCTT TTTTCCGCT AAATCTTCGC
721 TCCTCGTCAA AGAAATCGAA CGGCAATTCC AGCCGGGAGT CGTCGCCTCT CAAGCGATTT
781 GCGAGAAACG TCTTCAGGCG CTCGAGCAGC TGCTCAACAA CGAAGTGCTC AAAAAACACC
841 CGAATTCGTA CTCCTCCGGC GTATTTGGAA TGCGATTAGC CGATCTACAG GCGGCCTCGA
901 GTGAAGAAAG CCGAAAACAG ATGGGTCTAC AGCCGAAAGT ATCGATTTTC AAGCGATTAT
961 ATCGATCCGT CGTGCCCGAG AAGAAATAAT CGATTTTTAT TGGATTTTTT TAGCTTTTTG
1021 AACGATAAAA TTGCTTTATT TTCTGATTTT CCGTATTTTT CGATCGAAAA CTTAAAAAAA
1081 AAATGTAAAA AACAGTCCGC TAAACAGGGC GCGCAAGCGG AATATCGGAG TGTCGTTTGT
1141 GTTTTGAATT TTAAAAATTT AAATTTTTGT TTAGAATTAA TTTTTTTTGA TTGAAATTTT
1201 GGTTTTTCCG CGGTTTCATC AGTTTTGTAG TGAAAAACA TTAAAAATAG CGGTTATTCA
1261 TTAAAAAAA TCTAAAAATG ATCGGCTGTT TCGATGATTT TTACGAATTA CGCGCGTGAA
1321 ATTTTAATTT TGTAGCGAAA TTTGAAACTT TTCCAACCGA ATCGCTTATT TTTAAGCGTT
1381 TTTTTTGTTA ACTGTTTCGCT ATAAAAATA AAAAATTCGA CAGAATATCG GAACATCGTT
1441 TTTTCCGAA ATTTTATTT TTAAAGCCAA ATAGTTTATG AAAAATCAA

```

//

```

LOCUS          14      1782 bp      DNA      linear PLN 25-FEB-2004
ACCESSION     14
VERSION       GeneMark.hmm v3.0 self_training
ORGANISM      C.elegans
FEATURES
  CDS          CHR    ---
              complement(join(500..624,982..1123,1169..1282))
              /translation="MRSSFLLVLLGIAFCQKASWNKATANERLDDAITNEFNVTDM
GNGLVTIEEIREYYENHLNKLNSNEGIDFIDRNFHNEKSVDIDTYRKLVKEWLTKKS
VEKILVGLFGNRREQLQESSSTVSS"

```

ORIGIN

```

1 ACTTCCCACG TAACTACAAT AACAATGCAT TCTGCACGTA CCAATTGTCT AACTAGGAT
61 CATATAACAT ATTGCTGAGA TTTGCACCAT TTTCCCTTGG TACTTCTGAT TATGTGATAG
121 TTTACGATGG AGAATCGGCA AGTAGTCCGG TTATTGGAAA TTATAGTGGG ACCTTGGTGC
181 CGTTTAGCTT AATTTCAAGT TCGAACAATT TGCTAGTGGT ATTTAATGGA AATACCGGTG
241 GCCAGGGATT CAGTGCTAGA TATACATCAT ATGCTCCTTT AATCTAGTTA TTTACACTTG
301 TTGGCATAGA TTTCAAGTTT CTTTTTTGTT TTGTTCTTAT TATGCATCGC GTAAATACAA
361 ACTTGCGAAT TTTTATCAA ACAAATCATA TTAATCATGT ATTTTTTCTG TATAAAAATA
421 CTTGCAAATA TTTGTTGCAT TAAATTTCAA TGGATAAACA GTTTAAACA CGTTTGAATC
481 AAGAATTGAT AAAAAAATT CAAGAAGACA CCGTCGACGA TGAGCTCTCT TGTAATTGCT
541 CTCTTCTGTT TCCAACAGG CCGACAAGAA TTTTCTCAAC GCTTTTCTTC TCGGTCAACC
601 ATTCCTTAC CAGTTTTCGG TACGCTGAAA AATATTTCAA AACTGTTACA ATTTATATAT
661 TCTGTTTTTC CTACCCTACC CCTACTCGTA TTGCACCAAT TGAAATGTTA AACCTAAAAA
721 ACAGTTTTGT AGTCACTGAT AGAATTGCGT CTATAATTTT CTGGCAAGGC TCAGTGATGA
781 AATATCAATA AATTTTTCGA AAATAATAAT TTTTTAAAAT AATAAATTTT TTGAAGAATT
841 ATATTTTTGT GCATCGCAAT TTAAATAAAA ATTCTAAAAA TTGATAAACT TCAATGTGGG
901 GATGCATTTG AAAATTGTAC AAATAAAAA TTTTAATTCG AAATGCTTGC CAAAATATCC
961 ACATTTTAGA GTAAAATTTA CTGTCAATAT CAACTGATTT TTCATTGTGG AAGTTTCGAT
1021 CAATGAAGTC AATTCCTTCA TTGCTCAATT TGTTCAAATG ATTCTCATAG TATTCGCGAA

```

```

1081 TTTCTTCGAT TGTTACAAGC CCATTACCAT CCATATCGGT TACCTATATT CAAAAAAGTA
1141 CTTGATTTAT TCTCAAAAGA AAACCTTACAT TGAACCTCATT TGTGATGGCA TCATCGAGCC
1201 TCTCATTTGC AGTTGCTTTA TTCCAAGATG CCTTTTGGCA AAATGCAATT CCAAGTAAAA
1261 CCAATAGGAA TGATGAACGC ATGATATTTA TAGAAAGGGA ATACAAAAAA GCGGACTAAG
1321 ACTTACAAGG TATCAAAAAT CTGAAAACAA AAAATAAAAA AATGTTTTAA TTTTTTGCTC
1381 ATTTTTTGTC TGCGTTTCTG CTCATTTCGAT CTCTGAAAAA GTGGCCTCAT TTTTCTTTTT
1441 ATAAAATGTT GTCACAAATG TTTTCCTGAA GATGTTTTAC TGAAACTTCT TTAATTTTTT
1501 TACTTCTCAC CCGCGTTATC CCGCCCGTGA CCGATGTTTT TTCCTACTCA CCAAGGAATT
1561 GTTTCAATAC ATTCATTTTT CTACTCTCCC GATAAACATG TATCTCTATC TATTACTCGA
1621 ATGGGTGGAG TTTGACCACA CACGAACATA ACTCTTCGAT TTCTTCTCGT TGCTGGTCAG
1681 GGCTCATTGA CAATCGAATC AAACCTTGGG ATGTCTTCCA AGTCGTTTCT GATTCTAACA
1741 CTCTTTATTG CTATTTCTAA ATTGGAAGCA CTCATTTGCT AC

```

//

```

LOCUS      15      2191 bp      DNA      linear PLN 25-FEB-2004
ACCESSION  15
VERSION    GeneMark.hmm v3.0 self_training
ORGANISM   C.elegans
FEATURES   CHR ---
           CDS      join(500..616,1071..1212,1558..1691)
           /translation="MRQSILLILFGVAFQCQKNQWNSETADQRLDDVITNEFKARDM
           DHNGLVTTKEIREYYESHPNKMSKEGIEFIDRNFHSGGAVDVDGYRKLKLNWLTEKG
           SVEKILVGVFGNKTTPASTNNVGRATTVST"

```

ORIGIN

```

1  ATCCCAACG TTATAGTCTC GAAATTTGGA AATTCGAAGC CAACTTTAGT AGTGATTACT
61 GATAGTAATG ATAATGATAG CGAGATATTT CTGTGATTTG TGTATGTATT CGTTATATTT
121 TGTTTTTACA ATTAATCTAT TCTCCTTATT TGATTTACTA TTTCTGAACA CAAATATTTA
181 TGTTTTCTTT TCTTTTCATT TTTTCGTTGC CACCTCCCTT CCAATCACCT CATCTGATCT
241 CCATTTGTGAT TACTTTTTTAC TGATTACTGA GTAATTGTTT ATTTTGACCA TCTCTCGTTG
301 CCACCGGGTT ACCCTATTAC TTGCCATATC ACGTGTGAGG CTACTTCAGT CTTTTTGTAT
361 CTTTTTTTCA GTTTTTCACG CAATAAATGA ATTCAATTTT AGTGTGTAAA GTGTAGTAGG
421 AAACAAGAAT ACGGAGAGAG AGAAATAGAA GACAAGTCAC TTGCCATTTT TCAATTATTG
481 AGAATCGATT CTTTAAATCA TGAGGCAATC TATTTTACTT ATTCTATTTG GAGTCGCATT
541 TTGCCAGAAA AAGAATCAAT GGAATAGTGA AACTGCAGAT CAGCGACTAG ATGACGTCAT
601 AACGAACGAG TTTAAGGTAT ATTTATAATA ATAATAGTTA ATAGTTAACA GTGTCTCCAG
661 AATGTACCAT GACCTCCAGG AGTTTTGTGA ATTTTGCGCC AATCCGGTCT CGGCACGATA
721 AATGTTTGTT AAATGTGAAA AAAGTGTGTG CCTTTAAAAC TACTGTAATT TCCAAAATTT
781 GGTGCAGCGG AATTTTTATC AATTTTCATA GTTTTTTCTA ACGATTTGTT AAAGTTTATG
841 AGTTTTTATT TTTTTGTTCT CATCGAAAAA GTCTGCAAAA ATTGAGCAGC GATACTATTT
901 TGAAATTACA TTTAACAAAA TTAACAAAAA AACTTCGCGT CGAGACCAGG TACCGTACTT
961 TTAGCGCAAA AATGCCAAAC TTTCGCGTCT GTGTAATACA CCAAACGGCT TGTACATTTG
1021 AAATCACTCT TTGGCTTTTC TAAAATTACT GTATAGCATT TCAAATTCAG GCCAGAGATA
1081 TGGATCACAA TGGCTTGGTG ACGACAAAAG AAATACGAGA ATATTATGAA AGTCATCCGA
1141 ATAAAATGAG CAAAGAAGGC ATTGAATTTA TCGATAGAAA CTTTCACAGT GGAGGGGCTG
1201 TTGATGTGGA TGGTGAGATT TTTAACTTTT TTCGATCAGT TTTGTGTCTT AGCACGAGCG
1261 AAAGTTTATG AATGGCATGT GTCTTGA AACATACGGTA TTTTAAATTTG GATTTTATTG
1321 AAAAAACAAA TTCAACGTTT ATAGCGAAAT CCTACAGGAC ACGAAACGAA TTTAGTAAAA
1381 ATTCATAAGA ACTAAATTTA ACGTACCGTA TCCCTTTTAA GACTGCTTCA ACACCCATAA
1441 TGTTGAAAAA CCATAGTGAT AAATTATATA TTTCTAGAAA ATGGGCAATC TTAATTTTAA
1501 AATTTAAAAA AAACCTCAAT GTACAACATA ACATCAAAAT TTTTTTTCAA TTTCCAGGAT
1561 ACCGCAAGCT GATAAAGAAC TGGTAACTG AAAAAAGGAA TGTCGAGAAA ATTCTCGTGG
1621 GTGTTTTTCG TAATAAAACA AAACCTGCTT CAACAAATAA CGTTGGACGT GCGACAACAG
1681 TGTCTACATG AATGCACTAA ATTTATTGAC TTTCTTTGAT TATGAAACAA GACCAGACTG
1741 AACATGTTGT AGACCACAGA ATAAATGTAA TAAATACGAA TTATCTCCAA AAAATTATTA
1801 GGGGTTATAC CAGTCAATGA AGAGAAGTGC GAACGAAAGT ACAACAATTG AAAATAGAAG
1861 GAATGCTCGC TGTTTTCCAG AGTTTGTGAT AGCTTTTCGA ATCCATTCAT TTCCGTCGGT

```

1921 AATGTTTTTCG GTTGTATGTA AAGCATGATC GTGTATTAAT TCAACATCAC GGTCTTGTTCC  
1981 CAAAACCTGA AATAAATTGG TTTTGAAAAT TTTGAAAATA AATTTGCGAA TACCTTTTCT  
2041 GAAAACACCG TGTGTAAAGA TGCGATCTCC GTTAAATGCT GCTGAAGCTT GAGAATCTCG  
2101 TCATCCTGAT CCTCCTTTAC AAACCTCTTC TTTCGAAGCT CAGCTTGTTG TTGGAATTCC  
2161 ACGGCCAAACT GCTCTCCTTG CTCATCTCGC C

//

LOCUS 16 2276 bp DNA linear PLN 25-FEB-2004  
ACCESSION 16  
VERSION GeneMark.hmm v3.0 self\_training  
ORGANISM C.elegans  
FEATURES  
CDS join(500..518,750..841,1015..1104,1524..1698,1754..1776)  
/translation="MGNILCCKKNENEESMLTTAEKRPPKKKVRHSRKKQLVIYDPE  
GISVHDLALLGQKNVADGLVKPDLKPKKMGRVTLMPDIQPHLTLKAGTTTISSQKPS  
PASKSTDDFEISEVEDYVDDLQMLMPDRDL"

ORIGIN

1 ACGCTGAATT CAGAAAAACT AGGTTTACCT GGAAAAATACT CTTTTTTTAC CACATTTTCC  
61 AATTCCGATT TTTACTACGT TCCATATCTT TTACTACGGT AGCTTGTTTT ACTACAATGG  
121 CTGGTTGGAT TTATTACTAC GTTTTGTATT TTTTACTAC AAATAACGAT TTTTTTACTA  
181 CCTATTGGAA AAAAGAGTAT CAAAAGTTGG AATTTGAAAG TTACCTTGTA GCAGATTTCA  
241 GGTATAACAA CAACAAAAAT TTTACAAAAA TTTTATGTGT TGGGGACGGA CGTAAGAGGT  
301 GCCACCCACA AAATGGTTAA ACTTTTTTAGC TGGAAAAAGT TGGTAAATTT TCAAAAAAGT  
361 TAAAATAAAA ATATATATAA AATATTTTCTC ACGTTATTTT TTGTTCGAAA TTCGAAAATT  
421 TCAATCGACC AAATGTATTA ATTTATTTCT CAATTTTCAA AAGTTAAAC AAAGTGTTCAT  
481 TCTTTCAATC GGTAACATAA TGGGAAACAT CCTCTGTTGT AAGTTTTGAG CGCCTACCTC  
541 ATACCTGCCT ACCTAGGCAG GTATTTAGGC TAAGGCTGCT TCAAATGCAG GTAGGCAGGC  
601 GTAGGTTTCC TTGACTGTAG TTAGGCGAAC GTTTCGACGCC TATAAGGCAG CTTGGCAGGC  
661 GTAGGTAGGC TTGAAGGCGT ATAGGCAGGC ATTTGTTGCC TAAGGCAGCT TGCCAGATTT  
721 TCGTATCTAT TTGAAACCCT AATTTGCAGG CAAAAAGAAT GAAAATGAGG AAAGTATGCT  
781 GACAACGGCG GAGAAGCGTC CGCCGAAGAA AAAGGTCCGG CACTCGAGAA AAAAGCAGTT  
841 GGTACTTGAT AAAGATCGAA AAATCATTCA GAAGGAGAAG GAGTTGTATC AGGCAAGTGC  
901 GCTCCATTGA TAAGCAACGC GTGTACTCCA CTTGGAAAAA TTGGAAAATT GCGAAATATC  
961 GATTTTTTCAA AACCATTTTC CACGGGGAGT ACACAGTTAG ACAACAGGTT TTAGGTGATC  
1021 TACGATCCGG AAGGAATTAG TGTTACAGAT TTGGCTCTCC TGGGACAGAA GAACGTGGCG  
1081 GATGGGCTGG TGAAGCCGGA TTTGGTGAGG AGTTGGGATT CTAGGCCACG AGTGACGTTA  
1141 TAACCTAGCT TGTCTTAGCT GTGGGAGCAC GGATTTCTGG CTTCTCTCAT GAATTGAAAT  
1201 GGAAGAGTTT TTGCCGAACT AGGCCATTTT GGCTCGGCCA TATCTTGGGT AGATTTACTG  
1261 CGCGTTGCGT GTCGCGTCGC GGCTCGATTT TAGTTGTAAA ACTAAATGTA TTTGTCCGTG  
1321 TGGAGTACAC AACTTTCCCA CGCGTTGTCC GTCAGGCAAT TGTCAATGGA GCGCGAAAAA  
1381 TTCAATGAGG AAGGCCAGAA CCCAGTGTAG GAGTTTCTAG ACTAAGGGTG ACGTCATCAA  
1441 TGTCTCCAGA CCACTGATGA CGTCATAACT TGGCGAGTGG GAGTTTGGCG ATGTCACTAG  
1501 AGTAATTCCG GCCTTAATTT CAGAAGCCGA AAAAAATGGG CCGAGTAACA CTGATGCCCG  
1561 ACATCCAGCC GCACCTCACA CTGAAAGCCG GCACGACGAC GATCTCATCA CAAAAGCCAA  
1621 GCCCCGCCTC CAAATCGACT GATGATTTTG AAATTTCCGA AGTTGAGGAT TATGTCGATG  
1681 ATTTGTACCT GCAGCTGAGT AAGTTTTGCA AAACAAAAA TTCAATATTT ATCGATTTTT  
1741 CTGATTTCTT CAGTGGATCC CGATCGAGAC CTATAGACCC GCCTAATTTT TTGAATGAAG  
1801 TTTCGAATAA AGTTTATTGA TAAAATAAAT GTGTACTTTG TGTGGACAAG CAATGACCTT  
1861 AAAAAAATTG CTATTGTTGG GGACTAGTTT TTGAACTGGT GGCCTAGAAA ACTCAGAAGT  
1921 TTGGTCACAT TTATGAAGAG GTTTCGGTGG AGGGCCACTA TTGGACAAAA AACGCTAGGG  
1981 ACTAGTTTTT CACCAGGCCG CCTAGGAATT CCAAAGTTA AGCCACTCTT AAGACTAACT  
2041 TCGGGGTACT GTAGAAGTAC TGTAGTTTTA GAAAAATTGA CTTTTCGTCT TTTGAATGGA  
2101 TATTGGTTTT GGGTTATTGG AGGGATATGG TCGGGGTACT GTAGTAGTAC TGTAGGGGTA  
2161 CTGTAGGATT ACTGTAGTTT CAGAAAAATG TACTTTTTGT TTTTTTGAAG GGATATTGGT  
2221 ATTGGGTTAG TGGAGGGAGA TGGTCGGGT ACTGTAGTAG TACTGTAGTT TCAGAA

//

LOCUS 17 5257 bp DNA linear PLN 25-FEB-2004  
ACCESSION 17  
VERSION GeneMark.hmm v3.0 self\_training  
ORGANISM C.elegans  
FEATURES  
CDS complement(join(500..669,2113..2320,4728..4757))  
/translation="MYPNLKRRKPPMIPTMSAPPEYCETVDETIASHSKDEMPPPIYV  
MDVSNLTWHRAFPPPTYDDEERQIDEEPMSIEAEIDREQTRMYRCGPVLSSETKSFL  
LCFFTVFLGLLILLPTLFFVSVLSKDQDPNISPSI"

ORIGIN

1 TTGTTCTTTT ATCTTTCAAA TAAATCTTTT AAAAAATTTAG GACATTGAAA CAGAAAAGAA  
61 GATAGAAAAA GCGATGTTTC ATTTTTTTTCA AAGGAAAAAAA TTACAATTAA ATTTTAAATT  
121 TGGTTGTGAG ATCAAATAAA AATACCGTAT TCTTTTCAAT TGGTACCATA AAAAGGGGTG  
181 TTACAAAAAC ACGCCAGGGC CTTACATTGT AGGCAGGCGC AGTTTCAGGG CGCAGTGCCT  
241 GCAGGAAACT TTACGAGCTG CTGGTCTCTA AACAGGAGCT TTGACATCTA TGTACATGAA  
301 TCCCCACGCT ATTGATTAAT TGATTTTGGT CCTTGCCAAA AATAATAGTT TAAGCAAAAA  
361 TGCTGAAAAT CGGAAGTTTA ATTTTAAATG CATAGAAAAA CTTCTCTCAC TTGAATCAAT  
421 TTTAGGCAAT CACACTTTAC TGCTGCTAAT CAAAAAGAAT ACGGTTTATA CAAGAATTGT  
481 TGCTAGAATA AGTTTGTAT CAAATACTGG GCGATATGTT TGGATCCTGA TCTTTCGAGA  
541 GAACGCTGAC GAAGAACAGT GTTGGCAAGA GGATTAGAAG ACCAAGAAAC ACGGTGAAGA  
601 AGCAGAGAAG GAACGACTTT GTCTCTGAGA GAACGCACGG ACCACAGCGG TACATTCGCG  
661 TTTGTTCTCC TGAAAAATCA TTGTGAATGA GAATACTGGT ACCTGGGTGT ATACAACTTT  
721 AAATGTCCAT ATTGTGAATG CCCAACCAAT TTTGATAATT TTTCACCGTT TTAATAAATT  
781 ATATTTTCAA AATGAAAATT TATATTGAAA CTTTTTCGATC TAATAGTAAG ATGTTAGGTA  
841 AAAACCAAGA ACAATAAATA CCGTATATCT TCTATTAATA TGGCCTCCCT ATTAGACTTG  
901 CACTCCCTAT TAGTCTTGCA CTCCATAATA GCCTTGCCTT TACTCTTTT TATTGCAGGC  
961 CCGTCTTGTT AACTTCAGGA TTTCAACAAA AAAAATTTGCC TATTTTGCAA CAGTTTTTCA  
1021 CAACATTTCT ACGAGATTGA AGTTTTTGAA CTTATATGTT ACAATTAATA TCAAATTTTC  
1081 TGAATTTTTA CATAAGATTC GAGCTTTTTT AGAAAAAAC TAGTAAGCTC AAAGTCAGAA  
1141 AAATGTTCTG AAAATTAGTA TTGCACTCCC TAATAGTCTT GCACTCCCTA TTAGTATTGC  
1201 AAGCGGGAAG GTCATCGAAA AATAGTATTG CAGCTATATT AATAGAAGAA ATACGGTAGT  
1261 TAGCTTCCTT GAAACAATCT TCAACACTGT TACACTTAAT CTATTATTTA CAAATCATTT  
1321 CCCGCTAAGC TCTAGTCTTA TCTTTTTTTT TCTAAATTGC CTATTTAAAA AATGTTTTTG  
1381 AGTGTACTCA GACGAATTTT AGCGATGCTT TTTTCTTTT CAGTTCGGGC GGTGTTGAAG  
1441 TATTATAATA GTCAAACTAT AGACTAGAGT TTCGTACATT CGTCAATGGA AAAGAGTTAC  
1501 AAAACGTGAT CTTCGAAAAT GTTGGGAGAT TTGAATATTA TTATGTCCGA ACGCGTAATG  
1561 TGTGAACATT AACTTTTTTT AAAAAATTGAA TTTTAAGTTT TCTCATGTGA CTTTTTTTTT  
1621 AATTTTAAAA CTGATATGTC GCGGAACAAA TGCAATAGAA AAAACTGTTT CGTTTACAAA  
1681 TAGGCACAAA AATATCTGCC TGTCTGCCTA CTTTCATCAG TACATTTTTT TCGGTACATA  
1741 TTTGCAAAAC CTCCATTTTC TTACTGTAAT GATAACGTTT TTATTTGGAA ATTTCAATAG  
1801 AACTATTGAA AAATAATTCA ACTTTTTGAG AATTAATTTA TTTTATCAA AGTTTTGAGG  
1861 AGTTGCTCTA AATCAAAATA AAAGTTTGGAG GCAATGATGA GAAAATGGAT GTTTTGTAAG  
1921 TGTTCCCCGT TTTTAGTATT GCTACATATT TACTGCAAAA TTTTGTGGAT AGACTGTTG  
1981 TAGGCACGTA GGCACAATTC AGGCACGTAG GTAAAATACG TGCCTACCTA CATAGCATGG  
2041 AAGTCTCAGA TCAAACCTGT TTAGGAAAAG TCAATAGAAA ATGGTCGAAA AATAAACTAA  
2101 AAAGAAACTC ACGATCAATT TCAGCTTCTA TACTTCTCAT TGGCTCCTCA TCAATTTGCC  
2161 GTTCTTCATC ATCATAAGTC GGCGGAAATG CTCTGTGCCA CGTCAAATTG CTCACATCCA  
2221 TCACATAAAT CGGAGGCATT TCATCTTTTG AGTGTGACGC AATTGTCTCA TCAACAGTCT  
2281 CACAGTACTC TGGAGGAGCG CTCATTGTCG GAATCATTGG CTGCAATCAA GGGGGAAAAG  
2341 TGAAAAAGAT GATGATGATA TGAGTTTGTA AATAAATTAT GCATGTACAT CAGGGTTAAT  
2401 ATCGGTGCAG TGATATTTAT AGGTTTTTTC GTATGATTGC AACTGATAAG AGAAAAGTTG  
2461 GGCGGAGGGT CAAATGATTG AGAATCGGGT GGAAAAACGT ATGGAATTCG AATGGGAGTC  
2521 GATCAGAAAT CTACAATTTT AAATTGAACC TTTCAAAATC TGGGGTGTCT AGACCATTGG  
2581 TGACGTCATT TTTCCGTCAA GAGCACAATA CTTATGAAAA TACAAAATTG ATCTAAATAA  
2641 TAGTTCAATT TAAAATTCTT TAGACCTTGT AACAATTTCA GTCATAATAT CGGCAAACCTG

```

2701 CCAAAGTTTT GAAAAATTTA GAGCATTCTT ATGCGTTTTA AACCTACAA TAATCTTTTT
2761 TTTTGGTTTT TGAAAAATTT TGTTACAATT TTTGGTATTT TGAGCATCAT AAGTAATTCT
2821 AAACATGTTT CACCATTAGC AAACAGTTTT GAAAATTGTT TAAATTGTTT AAAAAATAAAA
2881 AATAAACTGG GAAAAACTCT CAATTTAGTG TCCACATCAC TCCTAAATAC CTCACTATTA
2941 ATAGAAATTT CACATCAAAA TTTAGATAAG AACGAGAGCT GTAAGAGGGT CAAATAGTTA
3001 AAAATAGAGA AGCATGTCAA CGAAATTAGC TCAAAAATAA ACTATTTTACA ATTTCAAGAA
3061 TTATTTTTGT AGAAAACTGG TAAGTGAAAA ATTTTTGCAA AAATATTACA AAAAAATAAT
3121 ATAAGAAGAC ATAAAAATTG AAGGAAAACC TAAAAGTTTG ATTGATAATT CAGTAGCCAG
3181 CTTCCCTTCAT CATAACACGT ATGAATCTTC CATATTTTTA TGTTTTTCTT CGGCTACTCA
3241 TTTCCCTCATT TCTCTTTCAA AAAAACGAAC ATCTGTCTGG TTGTAATGAC TTGTAATGAG
3301 TTTAGAACCA CATATCTTTC CTCTAAAAGT TTTTTTCCGG CAGAAAAATG TAAAAATATG
3361 TCTGAGAGTT GGTGGAGTA GGGAAATAGT CTGGCTGAAA ATTATGATTC GAAAAGGACA
3421 TGGGAAGTTT TTTTTGAGAC GGTAGACAAC GCAATGTCAT TTAICTAAAA GCTTAAAAAT
3481 TTAAACTTTA AAGGTTCTAC TTAAATTTCA AAACAACCTT CACCTGCCTC GCGACTGATG
3541 CAAAAGTATG GGTGAAAATC GACAATTTTG GCTGAATCTA GGCAATTCTT CAGATAGTAA
3601 TTGTTCCGGG ATTTTCGTTT ATAAAAACGG AAAGAAATAA CGTAGTTTCC TATTTTTTGT
3661 CTAATTTCTA AATCAAGTAA AACACAAGTA AAATTTTCAG ACATTTTCTT CCGCAAGCAA
3721 AACAAAAATT AAAATAATAT AAAATAATCG GTTTTGATTC CAATTTAATA ATGATTCAAC
3781 CTTTTTTGTT ACAAATTGA ACAAATTTT TTTTTAAAT AGAGTTGAGT GAAAAAAGTT
3841 ACCTTCGGAT ATCTCAGGGT GAGTTTAATT AATTTTTTTT GTTCGGGAAA AACCCCGCAG
3901 GTGTAECTCC GACTTAAAAA TTACAGCTGT TTCTAAAATT GATATCTGAA TTTTTATAAC
3961 AAACATCCTG TAGAATTGCG CTACAAAATC TGAAAACAAA GACTGAAATA CATAGTCAAG
4021 TGTCCTTATT TCTTCCCAT GCCATCCTCT ACTCTACTCC ATTTACATT CTGCGCTCCA
4081 ATTTCCGGAC CTCGTGCCGT TTTCTAATAG AAGAAGAATA CAGAGGTTAA CCAAAAATTT
4141 AAAAAAGGCG AAAAAATATG ATAAATTTTT ATTACAAATT TACGACGTGA ATCACACGGG
4201 GAGCATGAAA AAAGTACGA AAAAGTACGA AAAAGCAAAA AAAAAAATG AGAAGAGCAT
4261 CCGGGAGAGT AAGAAAAAGG TCCTAATTGC CAACTCGATG AACTTTTGAC GGACGAGAAG
4321 AGGACAGATG AAGTGACTTT TTTTGCATGA TGGAATGACT TGGCAGGGAG GAAAAATAAA
4381 ATAAATGTGT TGGTTTTGTC GGCTTGACCT TTTAATGGGT GTTAGTTATT GAACTCGTAA
4441 CTTTTTGAAA TGGAGCAATT TTCAAATTAA ACTTTAAATA TGGAAATACC CTTCAATAAG
4501 GCAAATTTTG CCTATTATGC GCCTATCAAC TCCTAAAAAA ACTATGACCA TGTTTTTTTT
4561 TAAATTTTAA CTTTGGAAAG ATAACTTTCA TGTTCCGGAG AGCTGAACTA AACTAAAGAA
4621 TGACTAAACT TGAATAAACT TAAAACATTG GAAATTCCAC CAGAATTCGA AAGTTGACAA
4681 TTTAATTTAA TTTTAGCCAC CTCTTTTCAC TTTTTTTTGG CACAACTGG TCGTTTTCTT
4741 TTCAAATTTG GGTACATTTT TAGCTGAAGT AGTAAAGCTA TAACAGATTG CGTTACTTCA
4801 ACTTCAAAGG TTTTAAAACG TTCTTTTTAT ATATTTTTTG CTTTGATTTT CAAAAAAGG
4861 TTTTACCAC CATAAATCTT TTTCTGAAAA AATATATTCA AAAGTGTTC AATTTAAAAA
4921 TGCGTAACAA TATACGTATT ATGTAAATGT TTTAGAACT GATTGCTATC CAAAGTTTTT
4981 CTAAAAGATG GGATCTGACA AATGAGTGTT TCTCATTTTC TTCTACTTGA AAAACACTTC
5041 TTAICTGCTA GGAAATTGGA TTAGGAGTGT TCAAATTAGG TTGTAGATT TTTAACTTG
5101 AGAGGTTAGC TGAACTTTTT TTGGCGATCA TTTATTCAGA ACTAGGGGAC ACCAAACAGA
5161 GCATAAATTG AGCCCAAATT TGGGAAGTTT CATTGATGTC GTTAAGTACC TTCAATGTTT
5221 AAATGTGAGC TGATTTAATT AAAGTAAGCC TTGAAAT

```

//

```

LOCUS      18      1693 bp      DNA      linear PLN 25-FEB-2004
ACCESSION      18
VERSION      GeneMark.hmm v3.0 self_training
ORGANISM      C.elegans
FEATURES
    CDS      CHR ---
              complement(join(500..718,765..920,1155..1193))
              /translation="MLGVVGGFFIYAKENSRLFDSVNPARYAQLLEIEMFTFCSLDIV
              DEKSTKASEMFLGQLYNDQKRSFGYITNTGVRMILVLDATSAASLKDQEIRLIFKR
              FHGHYCNITISNPFYEIGTPMQSKWLDEGINDLYSISE"
ORIGIN
1 TTTTAAACAT TCAAATCGC TGGATTATCT TTAATATAAC TTGTTTTGGA TTTATTTTTA

```

```

61  TTAAAATTTA CCAGAAATTT CAGAATTTCA AAAAAAAAAC AATTCCTGAC AATACAAAAT
121 TGTA AACCGA AATTTAATTT CGAAAAAAT CAGAACATTT TCTGAAACGT TTTTAAAAAA
181 TTCGAATTAA AAACAAGAAT ATAAACTTCT CACAAAGTAG TTATACTTTA ACTTTTTAAC
241 TTTTGAAACT GGAGAATTAA CAGACGTCAT TTTTAAAAAA AACTCACCAA ATTCGGAGCA
301 ATAAAATCCG AAACATTTGA AAGTCGAACG ACACCACTGA ATCCAGAATC TTCCATAAAA
361 CTTCTGGAAA TATTTTTAAT ATTATCTGAA TAAGACAATT AAAGATACAG TGACGTCAAA
421 GACGATTGAA AATCATCCAT ATTCGTAGAT TCACAAGAAA AAAACAAAAA TTATTTTATT
481 TACAAAATCC GTTTCATTAT TATTCACTAA TCGAATATAG ATCATTGATT CCTTCGTCAA
541 GCCATTTTGA TTGCATTGGG GTTCCGATTT CATAAAATGG ATTTGAGATA GTATTACAAT
601 AATGTCCATG GAATCGTTTG AATATCAATC GAATCTCCTG ATCTTTTAAT GAAGCTGCTG
661 AAGTTGCGTC AAGAACCAGA ATCATACGGA CTCCTGTGTT GGTAATGTAG CCGAATGACT
721 GAAAAATGAA GATATAAAGT AGTTTTCAGT CAAATATTCT TTACCCTCCA CTTTTGATCA
781 TTATAAAGTT GTCCCAAAAA CATTTCCGAT GCTTTTGTG ATTTCTCATC TACAATATCC
841 AATGAGCAGA ATGTGAACAT CTCGATTTCA AGCAATTGCT GTGCGTAACG TGGATTACC
901 GAATCGAATA GACGGGAATT CTGAATTTTT CTTTTACGAG GAGGCAGGAC AGGCCGAAAT
961 GATCGTCAAA ACGCGCTCCA CGGTCAATTG AAGACGCTCC GCCCCAAAC GATGGGTCTC
1021 GTTAGGTATA TGGTGGTAGA ACCGTA AAAAT CAAAAAACA GGGGCGGAGC ATTTCCAATT
1081 GGTCGTGGGG CGTATATTCA CATCGACCCG TCTTCTTGCT GCAACCGGTT TCGAATTTAA
1141 AAAAAACGC ATACCTCTTT AGCATAAATG AAGAATCCGA CGACGCCAAG CATACTGAAT
1201 TTAAAATTT ATTTTTTGTA ATACTATTTT TTCTCTATTG AGAATATTAA TCATATTCAA
1261 GTATTTTTCA GCGATGTTTG ATGTACCACA CACGTATTCT ATGACGGACA GCGTTATAAA
1321 ATA ACTCTCA ATTCATTGGT AACCATAAAG AAAACAAAAA AAGCACTCGA AAAGTTGAAA
1381 CCAGAATAAA TAAACGAAAA GAACAATGAT TATACTTTGC TGGAAATGTA AAAAGGCAAT
1441 AAAAAATTT AGATAAACAT TCAATTATTC AGTTGCGCTC GCTTCGAATT TTGGATATTT
1501 GGCCTGAGCA TCGGACCATT GTTGACGGCC AGCGACAAGA TCAGAAATGA GTCTTCCGAG
1561 TTCTGAGACT TCTAATCGAA TCTGTGACAT TGTTTCAGCG TGGCGGATGG TGACAGTGAA
1621 TGGAGTGGTC TTCAATGAAT CAAAGTCAAC AGTGATTCCG AATGGAATAC CAATCTCATC
1681 AGTACGTGCG TAA

```

//

```

LOCUS      19      1461 bp      DNA      linear PLN 25-FEB-2004
ACCESSION  19
VERSION    GeneMark.hmm v3.0 self_training
ORGANISM   C.elegans
FEATURES   CHR    ---
           CDS      join(500..653,696..961)
           /translation="MKTL L L L L L F L F T A S V A A I P F R S T T V V A R V I L R C K H P K D P S A K V F
           L M E K D F G D H E I D E D D T M D F A E F K F G Q I P E K P L Q L K G E E F E F S G L E P Y I Y I S H A C T E N
           R V E A W D S F N V T L E T S M Y L S A T F D V I I D L D T K K S T V I K N I "

```

ORIGIN

```

1  AAAAGATTCA AGATTTTCAGC TAAAATAAGC TCTTTTTTCG AAAC TTTGAA CCGCGCTAAA
61 AAAAAATAAA AAAATAGGAC ATATTTTTGA GCAGTTTCAT AACGAAGTTT GTTCATTTGA
121 ACAAATTCAG GCCCTGTATG TTTAAAACAG TCAGAACCGT TACTCCTCCT TTGATAGGAG
181 AGTGAAAACA CAAGTGCCTG AAAGTTCTGA ACATTTGGGT AGAAA ACTAC TAGAAACCAA
241 GTAGCCAGAC CTAATTTAAG TTTTGAATAA TCACAGTAAA ATTAGTTTTT AAAAAAGACGA
301 AACTTTTAGA AAATCAAAGA TCAA AATTGC ATTATTGAAT TTTGTTTGTA TATTCGTAAA
361 TCCATGGTTA TTCCTTTTTG ATATATTGCT CATATCAAAT ATATGTTTGC TAAATAAAAT
421 AGAAGGCGGG CCGGGCCAAA AACAAAATAT TCAAATGCAT ATAAAACACC ACGTTTGAGT
481 TTTTCTCAC AAAGTTACCA TGAAA ACTTT GTTATTGCTA TTTCTTTTCA CAGCCTCTGT
541 GGCAGCAATT CCTTTCAGAT CAACA ACTGT TGTTGCGAGG GTGATACTTC GTTGTAAGCA
601 TCCAAAAGAT CCATCTGCAA AAGTGTTCCT GATGGAAAAG GATTTTGGAG ATCGTTAGTA
661 AATTGATCAA TACACATGTA TAAAATAGT TTCAGATGAG ATTGATGAAG ACGACACAAT
721 GGATTTTGCA GAATTTAAAT TTGGGCAAAT CCCAGAAAAA CCACTTCAAC TCAAAGGTGA
781 AGAATTCGAA TTTTCCGGTC TTGAGCCATA CATTTATATT AGTCATGCAT GCACCGAAAA
841 TCGCGTGGAA GCGTGGGATT CGTTCAACGT AACTCTGGAG ACATCCATGT ACTTGTCCGGC
901 TACGTTTCGAT GTAATCATTG ATTTAGACAC GAAAAAGTCT ACTGTCATTA AGAATATTTG

```

```

961 ATGTTAATTA ATTTTCATTT GGAATAAAAC TAACAGTTAA CGGATTATGA CAAACGATGG
1021 TATGAATTAA AACAATGAGA TGTTCAACAT TTTCATGAGG ATGAATTGAA GGTAGTTCAA
1081 AGTCAATTAA ACAATAAAAT GAGAAGAAGA AAACAGGAGT TCAGATGAAA AAGAGTAAAT
1141 CAAAAATGAT TGGTTTTGAA AATCTAAAAA AAATAAAGAA GGAGTAACGG TCTCTTTCTT
1201 TTCCTTCAAG GTATTCATAA CGTTCGTCAA TTTCTCTTTA CTTTTGATGG ATTGCGACGA
1261 GTTTTTCTTT TTTTCGGTCC ATCTAAAAAA TGGCATTTAA AATAATTAAC AGTCTTGAAA
1321 AAAGAAATGC ACAAACCTTC TTCTTCATCG TCGATAAATG GAATTTTGGAG CATACTGATC
1381 GGCGGATTGG GTAGACCATT TTGGAAAGGC GAATCTCTTG GCAACCCGAC ACATTGAATT
1441 GTCTCGGCGA ACGCTTCAAT G

```

//

```

LOCUS          20      1849 bp      DNA      linear PLN 25-FEB-2004
ACCESSION      20
VERSION        GeneMark.hmm v3.0 self_training
ORGANISM       C.elegans
FEATURES
  CDS           CHR ---
                complement(join(500..829,1257..1349))
                /translation="MDISLPDNNERSIRTAFFHKKKEELINEKRMFMDCPKCLMIFFFDM
                IMYRMHMAMHIPLPSTDKMSLESSDTWKCSLCKREFSDRREFYIHTVKYSHSLIPRG
                FFVPPALPHYHGLPDLASLQPSDLLKELAEVLKANATDK"

```

ORIGIN

```

1   GAGACAAGAA GTTGCTCCTA AAAAATAACG AATTAGATTT TAAAACCTGG AAATTATTTT
61  ACCTCGGTTG GAGTTTCAAA GCTTGATAGC GCCGTCGTGT AATCGAAAAG AAGAGTCTCG
121 TTTATTTTAC GGGCTTGTGG GTCTTTCACA ACCATTGGGT AAACGTCAAT TTTTACCTTT
181 TTGCGTTCAG GGGATGCTCC TGGAGACTTG ACCATTTTTA ACGCTGAAAT TAATTTATTA
241 AAAACATTCA ATGACTTGTA AATAAAGCGA GGAGCACGAA AAGGAAATCG TAAAAACAAA
301 AGAAACAAAA AGAGTACCTA GTCGATTCTC TGCTGCCTCC TCGCTCTCTT CGCGTATCAA
361 TGGGGCGAAG TTGCCTTGCA TTTTAGCGGG TATTCAAATC ATATTTTCCA TTTTGTAAAT
421 TTTTGAATTT AAAAACGTTT ATCACATATA TCCGATGAAA AAATTATAGT TAGAAAATAT
481 TACAATTCGC AAAAACACAT TATTTATCTG TGGCATTAGC TTTCACCAAC TCAGCGAGTT
541 CTTTCAATAA ATCACTTGGT TGACAGAGTG ACGCCAAATC GGAAGACCA AAATGGTAAG
601 GAAGGGCTGG AGGGACGAAA AATCCACGTG GAATCAAAGA ATGTGAGTAT TTAAGTGTGT
661 GAATATAAAA CTCTCGTCGA TCCGAGAACT CTCTCTTGCA CAACGAGCAT TTCCACGTGT
721 CAGATGACTC AAGGGACATT TTGTCACTAG ATGGTAGAGG TATGTGCATT GCCATATGCA
781 TACGGTACAT GATCATATCA AAGAAGATCA TGAGACATTT CGGACAGTCC TAAATCATAA
841 TTATGATTGT TTAAATTCAA AATCTTCATC TTGGTAGTCA GTTGCAACTT TTTGGCAACA
901 AAAGTAATAC TTTTCAAAG GTGGAGTTCC ACAGTCAGTT TTTGAAACTC TAATTTTGG
961 TGTAGACCAA AACAATTTTT TAAAATTGGT TTTAGACCAA TAATAACTTT AACTTTGCAA
1021 GAATGCTCTA AATTACTCTA ATTTACCAAT TTACCAATTT ACCAATTTAC CAAAATTTTG
1081 ACTGCAAGAA GTTTGAAAAA TCTAAACATC TATAAACTGA ATACCTACGA TATTTGACCA
1141 TGCTAGATTA TTATGAGCGC ATTTATACAA GAAACATGAC TTGTTGGCAC TTGAACCTTA
1201 GAACACCGTA GTCTCCGGGT AGGATTTCGAT ATGATCTCTA CGAAAACCTG ACTCACCATG
1261 AACATTCTTT TTTCATTAAT CAATTCTTCC TTTTCTTGT GAAATGCTGT TCTTATACTT
1321 CTCTCATTGT CCGGTAATGA GATATCCATT CTGTAAGTTG ATTTTAATTT TGAGCCAAGT
1381 AAGAAATATA ACGTTAATAG TTTAAGAAAC AAATAACACC TGCACAAAAT CCAACTAACT
1441 GGCCTGAAGT GATTGACATA TAAACACTGA AGTTAAAAGT AATTAATGT TCACTAACTT
1501 AGAATTACAA CTAATCATT CACAGCTGCA CCTAAACTGA ATTTGGAAAG ACATGCTATG
1561 AAATGCTGCT TAAATTTCAA TTATTCAGCA AACCAGTCTC TAAATTTAAG AGTGAAACCA
1621 GTTCTCGTAA ACTCATCAGA CCATAGCATA AAATTTCTGA TTCAGTTTTT CGGTGAATTC
1681 AGTTTTGAAA AATAATTTGG GAGGTAAAGA GCATTCATAG TTTAAGATGT GAGGAACTTG
1741 GTCTGACAAT TTATTGATTA ATTTTCCGAA AAAAAACGTA ATACTGTAGC GCGACTGACA
1801 CCCTCCCTTC TCCATCGCCT TCTCGCCTAG GAAAATGCCC CCGAAAAAG

```

//

```

LOCUS          21      1674 bp      DNA      linear PLN 25-FEB-2004

```



ACCESSION 21  
 VERSION GeneMark.hmm v3.0 self\_training  
 ORGANISM C.elegans  
 FEATURES CHR ---  
 CDS complement(join(500..581,831..1174))  
 /translation="MSALIQVFLLLAVFAGISEMCGSVQHTETTTTTVAPATGGARK  
 RRSVEGSLVHIEFQTTLLTSAGDAEFSKIDEYVREEFGELLNKAHQVATGVEGGSV  
 LKYNAMINADCGAAQLFAQAVKDLTSFVTSATVRCDTQTSTI"

ORIGIN

|      |            |            |             |             |             |             |
|------|------------|------------|-------------|-------------|-------------|-------------|
| 1    | GATAGAACAC | TGAAAATGAG | AATTTTTTCGT | CTAAATTTCA  | AGTTTCGGCG  | TTTTTATGAG  |
| 61   | TGAAACTGAT | TTTTTTTTGA | AAAATGGCCT  | GTAACCTGGC  | TCAACATGAA  | AATATCAACA  |
| 121  | CACTTGAAAT | TGAAAAAAA  | AATGTGTCAA  | AATATTTTTA  | GTTACTACTC  | AACGAAATGT  |
| 181  | TTCTTCTGAA | ATTCAATGAA | TCAAAATTAA  | GAACAAATGA  | ATCAAAATTA  | AGAACAAAAA  |
| 241  | TTGAGTATTT | GTTGCAACTT | GAGAGAATCT  | GATGTCTCAG  | CTCTTTTTTT  | TTTTGAATTG  |
| 301  | GCAGTAGATC | ATTCCGTGTT | TGTGTTGGAT  | TGTGTTAGTT  | TTAAAATGCA  | AATGTGATTA  |
| 361  | TGAGATTTGT | CTATTGTCTT | CAAACATAAA  | CTTGTCTAGT  | TGCGAACAAAT | TGTTGATCGG  |
| 421  | AAATGTTTAT | TGATTAATTT | AAAACAAGAC  | TTTGAATCAC  | CATAACCCCA  | AATAATAAAA  |
| 481  | AATGACAGTT | TGAATAACTT | TAGATTGTAG  | AAGTTTGGGT  | ATCGCATCGA  | ACAGTTGCAC  |
| 541  | TTGTGACGAA | AGAAGTCAGA | TCCTTGACGG  | CTTGTGCAAA  | ACTGAAATAT  | ATCAATTAGT  |
| 601  | GTGGTTAAAA | TGAGAAAGGT | AAAATTTCCG  | AATTAATTAA  | TTTATTTTAT  | TATTTATTTA  |
| 661  | CGCTCGCGAG | ACGTGGAAAA | AGTTGAAGAA  | AAAAGAAAAA  | TGTACACATA  | CAATAGATCA  |
| 721  | ATACAATACA | CTGAATAAGA | GGGATAGAAA  | CAAGAAGAAT  | AAATAGAATA  | AATACTATTT  |
| 781  | CATGCATTTT | CAAGTCAGAA | CTAATCTGTT  | TCATTAACTT  | TTTCACCTAC  | AGTTGAGCAG  |
| 841  | CTCCGCAATC | AGCATTGATG | GCCATATACT  | TCAGAACACT  | TCCACCTTCA  | ACTCCAGTAG  |
| 901  | CAACTTGCTG | ATGAGCCTTG | TTCAAAAGCT  | CTCCGAACTC  | CTCTCGGACA  | TATTCATCGA  |
| 961  | TTTTTGAGAA | TTCAGCGTCT | CCAGCAGACG  | TCAATGTTGT  | TTGGAATTCG  | ATGTGAACAA  |
| 1021 | GACCGGATCC | TTCGACTGAT | CTACGTTTTT  | TTGCACCACC  | TGTAGCTGGA  | GCAACGGTTG  |
| 1081 | TGGTTGTTGT | TTCAGTATGT | TGCACGCTTC  | CACACATCTC  | AGAGATTCCA  | GCAAAGACAG  |
| 1141 | CGAGAAGCAG | GAAGACTTGA | ATTTAAAGCAG | ACATTTTTTTT | AGAGACGGAT  | GATATTTCTGC |
| 1201 | ACAAATACTC | TGCTTTTTAT | AGGATTCATG  | TATAGACACA  | TTATTTTTCAC | TTTTATAAAT  |
| 1261 | TTTATGGCAT | ACCGTGAATA | GAAAATTTTT  | TAATGGAATG  | TTGAGAAACT  | GACCAGTACA  |
| 1321 | ACGACAATA  | CTGTTCAAAT | AAGGAAAAAT  | AATAATTTTC  | AGTCTGTGTA  | CATGTTTGTA  |
| 1381 | GGGAAACGGA | ACAAAGTCCA | GTGTTGATCA  | AGTTCAAAAA  | GCTCGACAAC  | TTTTTCCTTT  |
| 1441 | TTCTTAAAAA | AAAATTTTCA | GCGTATTTTT  | AAGTGAGAAA  | AAGAAGGGCG  | TAGGGCGATC  |
| 1501 | AAGAGACTAG | AGGAGAGCAA | AACAGTACAA  | TTTCGAGATA  | ATCCAAGTTT  | TGTGCCTGAC  |
| 1561 | AACCGCACGA | TTTACACACT | TTTCGAAATT  | TTTAGCAATC  | TCGAATATAG  | CCTGTGCTTT  |
| 1621 | TTAAAAATGA | ACATCTTAAT | TTTGTCTACT  | TCTGAATTTG  | TTTTCCGTCC  | ACAT        |

//

LOCUS 22 1567 bp DNA linear PLN 25-FEB-2004  
 ACCESSION 22  
 VERSION GeneMark.hmm v3.0 self\_training  
 ORGANISM C.elegans  
 FEATURES CHR ---  
 CDS join(500..538,678..1067)  
 /translation="MSYMLPHLENGWQVDQAILAEEDRVVVVRFVGHWDPTCMQMDE  
 TLFKFIAPKVKNFAVVYLVLDITKVPDFNKMVELYDPCTAMFFFRNKHIMVDLGTGNNN  
 KINWAVTDGQELIDIIETVYRGARKGRGLVISPKDYSTKYKY"

ORIGIN

|     |             |            |            |            |            |            |
|-----|-------------|------------|------------|------------|------------|------------|
| 1   | GGGTGGTTGG  | CGGCGCGGAA | ATCTGAAAAA | GACACAATTT | TTCTATGTTT | TTTTTTCGGT |
| 61  | TTTTGAGGAA  | GGAAATTCTG | AGAGAATTTT | AAAGCGATAA | ATAATTGCGA | AACGTCCATG |
| 121 | GGGAGAGATT  | TGCATCATTG | TTGCTCTTTT | TCAAGTTGTT | TTGTCAATTT | GCACCTAACC |
| 181 | GAGGTTTTTTA | GCTTAAAATC | TTCGAATTTT | ATCTATTTCA | TCGCCATTTT | TATCAAATTT |
| 241 | CATTTGAAAT  | TCCCTCCAAA | ACGATGCGAA | ACGGGAGAAA | TTGAAAGAAA | TGAGAAGAAA |
| 301 | AAAGAAAAAA  | ACAAAAATAA | ATGTGTAACG | ATGCTCCGAA | ATGCCGCATC | GCGTGTGTTT |
| 361 | TAGCCAGCGG  | GAATTTTGTT | TCGAAAATCA | ATTTTCCACT | GGTTTTTCTG | TTACTTTTCT |

```

421 ATGTTTTTCAG CCATTTTTTCC ATTAAATTTA TCAATTTTTT AGATTTGTTG GCTCAAAAAC
481 TCACTAATTC AACGCAACCA TGTCGTATAT GCTCCCTCAT TTGGAGAATG GTTGGCAGGT
541 AAGGGAAATT GACAGTTTGA TTTTAAAACG GCAAAAAAAC CTGCAAATTT AATGTTTGCT
601 GTTCAGAAAA ACAGAATTCT GTGATGAAAA TTTGTTTTAA ATGCTCAAAA CTGACAAAAA
661 ATAACGATTT ATTGCAGGTG GACCAGGCGA TTCTCGCCGA AGAAGATCGC GTAGTCGTCTG
721 TGCGATTCCG ACACGATTGG GACCCAACCT GCATGCAAAT GGACGAAACG CTCTTCAAAA
781 TCGCGCCAAA AGTCAAGAAT TTCGCCGTCG TCTACCTCGT CGACATCACG AAGGTGCCGG
841 ATTTCAACAA AATGTACGAG CTGTACGATC CGTGCACCGC CATGTTCTTC TTCCGTAACA
901 AGCATATTAT GGTGGATCTG GGAACCGGTA ACAACAACAA AATCAACTGG GCAGTGACCG
961 ACGGGCAGGA GCTGATCGAC ATCATCGAGA CGGTCTATCG TGGAGCTCGT AAAGGACGTG
1021 GTCTTGTCAT CTCGCCGAAA GACTACTCGA CCAAGTACAA GTECTAATTA TTTTAATTAT
1081 TTTCTCTGTT CTCTGTGTTT TGTAAATTCT TAAACTGTAT CTAAAAATGT TTCAAAAATA
1141 TTTACATTTT ATTCACTCGA AAACCTGAGC ATTCTATACA AAAACAAAAA TATATAGGCG
1201 GCTTGAGAAA ATTGTGATTT TGATAATAGA AAAAACAAAA CGCGAAATGA GAATCGATTA
1261 GTCCTTCTTC TTGTCACCCT TGGATTCCGC AGAATCTCTG AGAAGATCGG AGACGCGGTC
1321 GAACTCGCGC TGGAGCCCTT CGGATTGCTT CTTGAGAGTG TCACGGTCAG TGTTGGCGGA
1381 CTTGAGCTCT CCCTTGAGCT TCTCGATTTG CTTTGCCAAT CCGGCGGCTT CTTCGTTGGT
1441 GTCAGCCTGA AAATTTGGAA ATTTACACGG TTTTAAAGGA ATTTGAGCCT ATTTTCTCAC
1501 CGAGTTCATC AAAGTCCTGG CGGTCTTGGT AGCAGATTCT GCTTGACGCA TTGCGGCCTC
1561 GCTGGCG

```

//

```

LOCUS      23      1484 bp      DNA      linear PLN 25-FEB-2004
ACCESSION  23
VERSION    GeneMark.hmm v3.0 self_training
ORGANISM   C.elegans
FEATURES   CHR ---
CDS        complement(join(500..848,902..984))
           /translation="MSQDPTISNFLNGKPIIAPVGPSSLLTRLQSFPLQMEEANRNM
           PENASADAFHIENVEDDSSDDSDSNSESISEEVPVTTDEKSTASSTQRIEIDLDFVK
           EMNSAVDDRVDVGIQNVEALPEAFQSKGEDSKPEITKKPLIEEL"

```

ORIGIN

```

1 GACGTCATCA GATACCGATC CGTAACTTCC GGTCTTTTTT TTCCAATCAA GCTGACACGT
61 TGCTGACGAG TCAACTTATT CAGCTGCATG GCACGGTTAT CCCAAGTCGT GGTGACTTTG
121 ATGAACTCAT CTCCTGACTT CTTCTCGATT CGTCCTTGAG TTGGAATCGG AATTTGTGCC
181 AGATCGCCAT AAAGATCCTT GAGCTTTTCC AACGCTCTCA CATCATACTC AGCTGCACTT
241 GTCACCACAG CAGACGACAT TTTACGAAGG AGAAGACGCT GCATTTCCGA AAAGTTTTCG
301 GAGAATTTTA GAAAAGGCAG AGATAAATAA AAATGGGAAG GTAATTCAA AATGGATAGA
361 AACCAATGAG ATAAATGAAT AAAAATCTAA AATCGAAATT TTATTGATT ATTTTCGAAT
421 GTGAGAAAAA GTTTTCGAGGG GTAGGTCAA AAGTAACAAA TTCAACAAAA AATTCACAAC
481 AATAGAAAAA ACATAAATTT CATAATTCTT CAATCAACGG TTTCTTTGTA ATTTCCGGTT
541 TCGAATCCTC TCCTTTTGAC TGAAATGCTT CTGGAAGAGC TTCGACATTC TGAATCCGA
601 CATCTCTGTC ATCAACTGCG CTGTTTCTCT CTTGAAACAC GTCTAAATCA ATTTCAATCC
661 TCTGTGTACT ACTCGCTGTG CTCTTTTCGT CAGTTGTGAC AGGTACCTCT TCCGAAATCG
721 ATTCTGAATT CGAATCGCTG TCGTCCGAGC TGTCATCCTC GACATTTTCA ATATGAAAAG
781 CGTCAGCTGA CGCGTTTTCC GGCATATTTT GATTGGCTTC TTCCATTTGA GGCAGGAACG
841 ATTGTAATCT TAAATTTTCA ATTAATTTTT CTAAAAAATT AAATAATTGC TTCAAAGTAA
901 CCTGGTTAAT AAAGAAGATG GCCCGACAGG TGCGATGATG GGTTTTCCAT TAAAAAATT
961 GGAGATCGTG GGATCCTGTG ACATCTGAAA ATGGTTTTTG GAGAAGCACA ACTGAAAAAA
1021 GATGCAGTGG GCGGAATTTT GGCTTCTTCT TGATAGAGTG AATAATTTTC AAAATAAAAA
1081 TCGATATACA ACGAATAGAG AAACAGTTAA AGTGCGGTTT TGTACAAAAT CTTTAATATG
1141 CTGCTCGAAT CTTTTTGCAT CTTATAAGTT AAATACAACG AAAGCGATTA GCGGAAATAA
1201 AACATCAGCA GTACCGGAAA AAAATAATGA CAAACATATC AACTAATAG CCGGGAATTA
1261 TATTTTTAAA TTATACAAAA ATTAGTCGGA AGCTTCAAGC TCCTGGATAA TTTTCGATATG
1321 CTCATCGGCA ACGATTTGTC CATAATCAGA CAGGTTTTCA GCGAAGACGA CATGAAGAAG
1381 AGCAGCTGGA GCAAGACTGA GTTGAGCCAA CGATGCAGAT TCATCCTCCA CGAGTTGACT

```

1441 GGCAGCGTCA CGAAGAGTGA ATTCGGATGT CGAAAGAGCA TCGG

//

LOCUS 24 1872 bp DNA linear PLN 25-FEB-2004  
ACCESSION 24  
VERSION GeneMark.hmm v3.0 self\_training  
ORGANISM C.elegans  
FEATURES  
CDS join(500..643,1079..1372)  
/translation="MAEKKESSASSKKSESSGNSSSGREDLEGSNTGVVIKPRKSK  
KKQKKVPKVSPASRKEDIPGCATVEKVSIRSGSEISQSEWLDNLVPGTLAKPQSRWE  
SITGFIDNYKYPPIISSVVLAVGLTYFIVKKGKAGAKCPFTGKKAN"

ORIGIN

1 CGATGAGGAT TCATTTGTAG AGTCAGACGA GCTTATGGTA GTTTCTGGAG TAGTTGGAGA  
61 AGCTCCTGAT GAATTGAATC CAATGAATCT TTTTGCAGGA TCTTTGGAGT TATTCGGAGA  
121 AGTTGGTGCA TGTTTCTGAA AGTTTTATAT TTTTGAATA ATCTCTCAA AGTTCTTGAT  
181 GGCTTTCAA TTTCTAGCGT AAGGCGTCTA ATATGCACTG AAAATATGCA ACTGAAACTA  
241 ACCTTCAAAT CCACAACGCA CACGGTCACA AAGAAGATTG ATAACAAAA ACAAGAAAAC  
301 TGCTTTGAAA ACATGGCGGG AAATTTAAAT TTAAAAATTC TTCCGCATAA AATTCGTAAT  
361 AATATTTTTT AAATTATTTA TTTATAAATT GTTCTAATTA TACAAAAAAA ACCACGTCGC  
421 CTTTTCGTGG TTTTTTAAAA TCAAAAGTTG AACAATCAGT TTCAAATAA TTCATTTCCG  
481 TACAATTTCA TCGTCAAGAA TGGCTGAAAA AAAGGAATCA TCAGCTTCAT CGAAGAAAAG  
541 TGAGAGCAGT GGAAATTCGA GTAGTGGAAG AGAAGATTTG GAAGGATCAG GCAATACTGG  
601 AGTTGTCATC AAACCGAGAA AGTCGAAGAA GAAGCAGAAA AAGGTATAGC ACTTGGTTGA  
661 GTAGACACTA AATTGTTACT CCCATAGTGG GCAAACCGGG TAAAACCGAC CTTCCGTTTT  
721 TGACCGGATT CTGGGGTTTT CGTATTCGGA GCCGTTTTTG GGTAGGCCAT CCGGTTTCTC  
781 AAATATTTT GCATATGATG CACAGGAGAA CAGGAACTCG TAAAGCATT AGGCACTGGG  
841 GTAGCCATGT AGGCTGTCAT GCTTCAATTA GACACATATG TACACAGTAA AGACATATGT  
901 ACACAGTAAG AGCATCTGGA TTTTCCATTT TCAATTTCTC TCCTTGACTT TGCTCTTTTT  
961 ACAACCTTAA GAATTATCAT CACGATTAAT TAATATCTAA GATCTTGGA TTGGAAAATG  
1021 AGATTTTTCA TCTTAAAGAC CAAAATAAT TTTTAAAAAT ACATACATCA TCTTTCAGGT  
1081 TCCGAAAGTA TCACCTGCAT CACGAAAAGA AGACATTCCT GGATGTGCAA CAGTCGAGAA  
1141 AGTATCCATC AGATCAGGAA GCGAGATTTT TCAATCGGAA TGGCTTGACA ATCTGGTTCC  
1201 AGGAACTTTA GCCAAGCCAC AATCTCGATG GGAATCAATT ACTGGATTTA TTGATAACTA  
1261 CAAATATCCG ATTATTTCCA GTGTTGTACT TGCTGGTGTT TTAACCTATT TTATTGTTAA  
1321 AAAGGGAAAA GCTGGAGCAA AATGCCCAT CACTGGAAAG AAAGCTAATT GAAGAAGTAG  
1381 ACGATTTTGA AATGCTATGA AGAGAATAAA ATGTTTTATT TGATACTGAA ACCAATTTTT  
1441 GAGTTTTTTA ACATTACTAA CTAAATGAGA AATGTGAAGG AACATCAAAA GTTCGAAAAT  
1501 TATTTTGAGA TAGATATTTT AAGAACAGTT ATAATTGAGG AATTAGAAAA ATGAGTAAAT  
1561 TCATTAATAAC CATACAATGA AGTCCAAATA TCTGTTTTCT CTTATTTCAA TAGATGCAAT  
1621 TTGGCAATCT CCCTCTATGT CCATATAACT GGTACAGTCA ATGTTTTAAAT CTTCTTTTTG  
1681 ATAATTGGAT GGTCTTCTTC TGGGATTCCA TGTTTTGCA TTCATTCTT CTAGAACCAA  
1741 ATCAAAGTTC CAGTCTTCCAG AAGCCAATAT TTCCAGATGT TCCAGACGAG TTTTATTACC  
1801 CTTCCAGTTG CTAATTAATG ATCTTACAGC GTTAATAGCT GAATTCTCTT TCCAATATAA  
1861 TTTTATTGTT TC

//

LOCUS 25 2172 bp DNA linear PLN 25-FEB-2004  
ACCESSION 25  
VERSION GeneMark.hmm v3.0 self\_training  
ORGANISM C.elegans  
FEATURES  
CDS complement(join(500..856,1571..1672))  
/translation="MTELISMNTLFSCIFTHFIIGATLIAFCTKQKAKSTIKEEPSQ  
AENRPQGGNETFHFTPPHIKTAVPTRSLLRQKHQQCPVHYEFSEDATTTTTTFVDSAH

SSDIQFDSTQASADSSISFLKRCTCFCAQKRVRVFCPPTTTTTTTTTTSFGFI"

ORIGIN

```

1 GCTGTTAAAT CTACAAAAAG TATCAAAATG TATATTTCCG GCAGTTCTGA TTTCCGGCAA
61 TTCCGGCAAT TGCCGGTTTT GGGAATTTTC GGCAATTTTC GCAATTTTGC GAATTGCCAG
121 TTTTCAAAAT TTCCAGCAAT TCCGGAAATT GCCGGTTTTA GGAATTTTTC GCAATCCCGA
181 CAATTGCTGG TTTTATGAAT TTTCCGGCAAT TTCGGAAATT GCCGATTTCA GTAAAACCTCA
241 TGTTCAGGCT CTTCAATCTA CAAAAAAGCC TCTCAAAATT TATATTTCCG GCAATCTGCC
301 AGTTTGCCGA TTTGCCGATT CGCCGGAAAA AATCGTTTGC CTACCCCTGA TTTTATTTTC
361 CCGTTTTCAA ATCTTCCGGC TGCTTACTAC ATTTTAGTGC AAACAAAAAC CTCTTTCCTC
421 ATCTTAATAT TTCTACATTT ACAATTTAAA ATCCAAATTA ATTTATTTCA AAACATAAAA
481 AAAAGAAGAA ATCGTTCGTT CAAATAAATC CAAAACACTAGT AGTCGTCGTA GTCGTCGTCG
541 TCGTCGGTGG GCACTGAAAT CTAACACGTT TCTGAGCACA AAAACACGTG CAACGCTTCA
601 AAAACGAGAT GCTAGAGTCT GAAGCCGATT GTGTTGAGTC GAATTGAATG TCGGATGAGT
661 GTGCAGAATC GACAAATGTC GTCGTCGTCG TCGCGTCTTC ACTAAACTCG TAATGAACGG
721 GACACTGCTG ATGTTTTTGA CGAAGAAGTG AACGTGTTGG GACGGCAGTT TTAATGTGTG
781 GAGGTGTGAA ATGAAAAGTC TCATTTCTCT CTTGTGGACG ATTTTCGGCT TGAGACGGTT
841 CTTCTTTGAT TGTTGACTGA AACAATTAGA ATTGGAAATT TGAAGTAGAA TTGCACAAAA
901 ATATGCATTT TTAACCGAAA AAAACTCGAA AAAATTGAGT TTTCCAGCGGT TTTTGCACA
961 ATTTTGGTGT GAAACCAGGG GTAGAAAATT TCCGGCAAAC CGGCAAATTG CCGAAACTCA
1021 ACATTTAGAG CAAATCGACA AACC GGCAAAT TTGCCGGAAT TGAACGTTTC CGATAAACCG
1081 GCATATTGCC GGAATTGAAA ATTTCCGACA AACC GGCAATA TTGCCAAAAA TGGAAAATTT
1141 CCGGCATACC GGCAAATTGC CGGAATTGAA AATTTCCGAC AAACCGGCAA ATTGCCGGAA
1201 TTGAAAATTT CCGACAAACC GGCATATTGC CAAAAATGGA AAATTTCCGG CATACCGGCA
1261 AATTGCCGGA ATTGAAAATT TCCTGCAAC CGGCAAATCG CCGGAATTGA AAATTTCCGA
1321 AAAACCGGCA ATTTGCCAAA AATGGGCAAT TTCCGGCAA TTGCCGGAAT TGAACACTTC
1381 CGACAAACCG GCAAATTGCC AAAAATGGAA AATTTCCGGC AAATTGCCGT AATTGAAATT
1441 TTCCGGCAAA CCGGCAAAAT ACCGAAATTG AAAGTTTCCG ACAAACCAGA AAATTCGGC
1501 AATTGCCGGT TTTCAAAATC TGCCTGAAAC TCAGTTTTTC TGGCTAAAT TCCCATAAAA
1561 ACTCCCAAC CTTTGCCTTT TGTTTCGTGC AGAACGCAAT TAGTGTTGCA CCGATGATAA
1621 AATGCGTGAA AATGCATGAG AACAGTGAT TCATTGAAAT GAGCTCCGTC ATATTTGAAT
1681 CTGAAAAGTG TCTTTCAAAA TTGTTCTTCG ATTTTGTCTT TCCAATAGCC AAAATAATCT
1741 GATCTCTCTG TTTGAATTCC CTCTAAAATG AGAACTACAC AAAACCAATC AGCAATTTCG
1801 TCCGCCACT TCCAACCAAT CAGGCGGCGT GGGCGGAGCT GGAAGGCGCT GATTGGTTTT
1861 GTAGTTCTCA TTTT TAGAGG GAAATAGGCA GTTTAAAGCA AAATCATTG AAATAAAGAA
1921 ACTACAATT GTCGATCATC GTTAAAGTTT GAAATGAATG GATTTCTATT TTTTGGGCTT
1981 TTGAATTTAA AATAAATTTA AAAAAAACG AATTTTAATA TTTACACGTG ATAATTTTGG
2041 ATTTTAAGAT TTGTTCTTTT ATAATTAATA TTAATAAATA AAAACAGCGT AAAAATCAGT
2101 TAAAAATTTA ATTTAATTAT TTGAATCGAA AATTACCAAT TTTGCTTCT CATTACAAAC
2161 TTCGGGAGTT TT

```

//

```

LOCUS          26      4089 bp      DNA      linear PLN 25-FEB-2004
ACCESSION     26
VERSION       GeneMark.hmm v3.0 self_training
ORGANISM      C.elegans
FEATURES
    CDS                join(500..565,2579..2785,3101..3172,3470..3589)
                        /translation="MIDWEVKKKKRWGSREIRSNSNMRLQLLIFVLFANLVISRK
                        HYKGRKYDLTLFVRNHNVS DATFFRLVGV DNTADFNVSAGNTFEHTFEVRRKGYWTL
                        FVEFPGDRYAKSPRKIISRDSYRKWVMEVYYPGAVGFSEWHKLSRRGEMHIHG"

```

ORIGIN

```

1 ACAGAATAAA TTCGTTTATC GAGAAGTTTC ATACCTTTTT TGGCGTAAAT TTTAATTACA
61 CTTCTTTTGA TTTGCTGAGT CATATTTCTC ATAACTCAGA AAAAATTGGT GAGTCATTTG
121 TAATTGTTTT AATTCAACAA TAAACTACTT TTAAGGACGA TCGAAAATTT CACAATATTC
181 ACCAAAAAAC TGTCATTTCT GGGTCAATAT GGGCTGGGTC TATGATAACT TTTTCGTGTT
241 CTAGAATATT TCTCACCCT GTTAGGCACG ACAAATAATG TATATAGAAT CAGAAAAATG

```

301 GATTTTTCAA TTTTATTTTT TTGATTGCTT AATTTTTAGGT TCCATTTTTG ATCTAATATT  
361 ATCTTAACTT TCTGAAAGTT TAATGATATG CTGGTCCCTT TCTCAAGTTT TACTTAATTT  
421 TAGAAGACTT TCCAGGCATT ATTTAGACTT CTTTGTCTCC TTTTTTAGAC TTTTACTGCT  
481 TTTTCCAAAA AAAAAAGGAA TGATAGACTG GGAAGTGAAA AAGAAGAAAA AGAGGTGGGG  
541 TTCCCGTGAA ATTAGAAGTA ATTCGGTTAG TAAAACCACA AACTTTTTCC CACTTTTGCC  
601 ATCCCATTCA ATTGTTTTTG TTTTATTTTT TGTTGTCTTG TTTCTTTTTT TTTTTTTTTT  
661 CTTACTCCAC CTCTTTCACC AACAACCTTC GGGTCTTCTG ATGTCTGAGT TTCGGCTTCT  
721 TTGGCTTCCT CGACGAAGCA AGACAAACCA TAAAATTATT CAAATTTCTG TCATTTTACA  
781 CACCCTTTTG CCAATTTATA CAACTGTCAA ATGGTTTGCG CATGAGGAAA CGTGAACGGT  
841 GAAACCTCCC ACCAGCTGCC ACGTCATTTG CAAGAGACTG ATGGATGTTT TTGTTGCAAG  
901 TTTCATGGGA ATTGTATTTT ATTCAATGAC ATTTGCCAAT ATGATTTCTT TCTTGATTTG  
961 TCACTTTTTG AGATTTTCCA CTTTTACTTT TATAGAATTT CTATGAACA AATTGTATCCA  
1021 ATTGCTAAAT TTGGTATTTT TGTACTCCGA AGTACGGTAC CCGGTCTCGA AACGACTGAA  
1081 ACTATAGAGT TAGCTGGGCC GCGAAAAGCT TGTCACAAC TGTAGCTCCA AGTTTGGGTC  
1141 GAGCAGAGGA ATGTTTTTTTT TAATATCAAA TACAAACTAC CCTAAAGCTC TTCTCTAGAA  
1201 ATTTCTATTT TCCTTTCCTG TGCCAACAAT AAACGTTTAA ATTTAAACTG TACTATAAAC  
1261 ATTTTGAAT ACCCTATAAG TTTTCTGATT CCTGATCCTT CTATCTATAT TTCCATGACT  
1321 CATACTCATT TTCCCGTGAA TCAAAAACCC CCGAAAAACA TACGAATTAG TTCAACTCAT  
1381 TAGGTTCTTC GTTTCCAATA ATTCACGTA TCTCCAATCT AAGTTTCAAT CTCTTTTTAC  
1441 CAATCTCACC CCAATAATTT CACCAAATTT TTGCCTCCTC CTCCATTTTC TTCTCCCAG  
1501 TCCTCGAATA GTCACTTCAA ATCAAACCTCA GTCGCAGTTT CAATTCTCTT CAAAAATGAT  
1561 TTCTTTGTGT CTCTTCGTCT TCAATGCTAT TTCATCAAAT AATTCCAAAT TGGTTTAGTT  
1621 CAGCTATGAG ATACGCATCA GTAGTATTTG AATTGACTCG AGATTAATTT GTCACCTCCT  
1681 CCGTTTAATT TGTAATCGTG ACCGCCCTTT CACTGGGTGG TCTTGAATGT TCTTTTTTCC  
1741 AATGTTTTCT GAGTTTTCTG GCATTCTTGA CCTAATTAAC CAATTTTCAG ATTAATTTCT  
1801 CTCTGGGAGA GAGAGAATCG AACGACTGGC ACATAGGTAC TAGAAAAACA AAAAAACCG  
1861 AAAAAAAGT AGGAAAGGAG GAATGATCCG ACAGCTAAAA ATTGGTAAGT CGTTGCCACG  
1921 ACAACCTGGA CAAAAATTTT AATTTCTCTGA ATTTTACTGA AATCTCTCAA AATAAAATGT  
1981 GCAATTTTTA GTTTCTCTAT CCTGTTTCCG GTTTCTTTTT GTTTGTGGA ATATTGGAAA  
2041 TCATACTTAT TTTTGTGTC TTTATTTTTT ATGTTTCTAC TCTTGTTACA TCCATTTTCG  
2101 TTGAGAGCTT TTCCCGTTTC TTTTCGATGA TAAGTTGACA GCTACATAGA CAAAGAAAACA  
2161 ACTAAGAAAC GAATAGAAAA CAAAGACGTT CATTTCTTTG ATTCCTTTTG GCTTTGGAGC  
2221 TTCGACAACT GTTGGGCTCC AGATTTAGAG TCGTATCAAG AATCTGATTT TCGGACGACA  
2281 ATAGTTGAAT TTTACATGTC CGAGAATTGT GTTCAATTTA ATGTTACTAA AATTTTTGAT  
2341 TTCTGTTCAA AAACCTGTAA CTTTTGAAAT TAAAATACTT TCAAACCTCT ACTAGACTTG  
2401 ACAGTTGGGT AGATTTTATG CCTACAGCCC AGAGGGATCA CCACCAGGCA GTGTACCTGA  
2461 CTCCCAGATC CGCAGTGCAT AGCACTTGAA GAACGGATCG TTCTTTAATC CTTTTTTTTA  
2521 AATTGAAAAC CAAAGTTAAT ATTCTCAATT TCTAAATTCC CACAAAAAAA TTTTTCAGAA  
2581 TAACATGAGG TTACAATTGC TAATCTTCGT GTTGTGTTGCC AATCTTGTA TTTACAGTAA  
2641 AACTACAAG GGACGAAAAT ACGATTTAAC GCTGTTTCGT CGAAATCACA ATGTCTCCGA  
2701 TGCGACATTC TTCCGGCTCG TTGGCGTTGA TAACACTGCA GACTTTAATG TATCAGCTGG  
2761 AAATACTTTT GAGCACACTT TTGAGGTAAG TCACGAGAAT TGGATAGGAA ATGGGATTTT  
2821 AGAATTTTAT TTCATACAAT AAAAGGTTAT ATGTAGAGTT CTTTCTTTTT TGCATTCTTT  
2881 AAATTTTAAAT GACTATATAA TAATATGAAT AAGCTTTTTG ATTAAAAAAG TGAATCTTTC  
2941 AATCTAGTAC ATGACATTCT GCAATAGTAT ACAGGACTAC GATAGGGAAA AATCACTGAA  
3001 AAATCAGGTA CTTTTCTGGA AATTTTGTGC TCTTCTATGC TCATGTTTCA ATATAATATT  
3061 CTGAACCAAA TATTGTTTTA ATTTCAATTTA TGTATTGCAG GTGAGAAGGA AAGGCTATTG  
3121 GACGTTATTC GTTGAGTTCC CCGGAGATCG GTACGCAAAG TCACCAAGAA AAGTAAGATT  
3181 TAAAAACAT AAAATCCAAG TAAAACCTCT TTACAATTTT TGGGTTACTG TACCTCCACT  
3241 GTACCTCGCG AGATTTATAG CCTAGCAAAA ATTTGACGTT CCAGTTTAAA GGCACACGAT  
3301 GTTCTTCTGA TTATGATCTC ATATGATCTC ATTTATAACG GTCGCTTGAC AAATTTTACA  
3361 AATTTGATTA TTTGGGATAG AAAATGAAGC TTTATCTTGA AAAATTTAGG TTGTTGGCAT  
3421 TTCGAATTTG ATAATAAATT TATTGAAACA AAATCAATCA AATTTTTCAGA TAATATCTCG  
3481 TGATTCGTAT CGCAAATGGG TGATGGAAGT GACTACTAT CCGGGTGCCG TTGGTTTTTC  
3541 TGAATGGCAC AAATTATCTC GACGAGGTGA AATGCACATT CATGGATAAT TTAATGCTCC  
3601 GTTCATCACA CTTTTGTCCA TTTTCCCATC TCTTCCGTGG ATCTCAATGT CCTCCATCCG  
3661 GTGGACCACC TTTTCGATCA AATAATTGTT TTATTTCTCT AATTCTTCCC CACAGTTTCT

```

3721 TTCATATAGA ATTTTTATAT TTTCTATTAT ATATGAACAT TTGTAAACGG TGATCTTAAG
3781 TAATTTTCAA AGAATTTGAA ATTTGAAAAA TTTAGCTCTA TTTCAAATC GCTGTAGCAG
3841 TTTTATTCAA ACTTACTAAT TGTGTATTTT TGTATGTACA AATAGTTTTT TTTTCGTGTA
3901 GAGCTTTATC CTGTTTCAGT TCTTCCGTTT AACTACTGCC ACTGTTTTTC TGTCAAAATT
3961 GTCGATGACT CTCTCACCCG ATAAAACTTT CTCAAGTTGA ATTGATTTCA GGTTGACTGG
4021 ATTTTATATA GTTCACCGGT GTATCAAAAT TAAAACATGC AGTAAAAAAGG TACAAAATAT
4081 ACAAATATA

```

//

```

LOCUS          27      4244 bp      DNA      linear PLN 25-FEB-2004
ACCESSION     27
VERSION       GeneMark.hmm v3.0 self_training
ORGANISM      C.elegans
FEATURES
  CDS          CHR   ---
              join(500..533,582..739,3415..3591,3640..3744)
              /translation="MFAVFLAVSVFVLSTAIPQLKDTNPVTIPACPAGSRPLLRPD
              GQPRKCLPHQNSLCINALPDKPNADTVCCYHNQVDYYCCLDTTEQQCPDYHQVTVVI
              HNSFPQNPFFALKSFFFKDGIEDDIIDATFGRGDEGLQENGLLVRHQQPQGNEILKQ
              "

```

ORIGIN

```

  1  TTTTAAATTA TAAATTATAA ATTTTATATT TAAAAATGTT ATTAAACAAA AAATGTAAGG
 61  ATATTGGCGG AACCAAGGCAT TTGGAAAAAA AATTGAAAAA AAAATTGAAT ACTTACTTCT
121  GGATTTTAAA TTCAAAATTT TTTTAAACCG GATTTACAAA AGTGGAGGTT TTTGACATTT
181  TTTTTCAAAC CTTGAGATTT TTTAAAAATT TTGGAAATTT TTTAAAGAGA AATTTCAAGA
241  AACAAATCAA AATTTTTGGA AAATTTTTAG GGTTTCATCCA AAATTTTCTA TATATTCTCA
301  TTTTCCCGCA CGCTTTTCCC GCTAGCCTTC TTCTTCAAAG ATTTGATAAG ACGATTGATG
361  AGATCTCAGA TCTCCGCTGC GTAAAAATGT AAAGAAAAGT AAAAAAGGT CAAATTTGAA
421  GAATCGTCGT CGGAAAAGTG AAAATGACG GAAAATCATC CGAAAAGGCT TGTAGATTTT
481  TTCCCGTGG AAAATGAGAA TGTTTGCAGT TTTTCTAGCG GTTTCTGTTT TCGGTAATGT
541  TATTTTAGTA ATACTTATTA ATTTAATAGT CTGAATTTCA GTCCTTTCCA CAGCAATCCC
601  AACCCAACTA AAAGACACAA ATCCAGTAAC AATTCCTGCA TGTCCTGCAG GATCCCAGCC
661  TCTCTTAAGA CCCGATGGTC AGCCAAGAAA ATGCCTACCA CATCAGAACT CATTGTGTAT
721  TAATGCGTTG CCGGATAAGG TAAGAAAATC ATTTTGTGTA ATAAACTTTC GATTATGAAT
781  TCATATTGAA TTCATATTAG GTCTCCAAAT AAGTTCCGGG TCAAAAATCA TAACTTTGTT
841  CGCTGTGTAT CGATTTTTAT GAAACTGTGG GATTTTACGT TATCAACCAT GATCTTTCAT
901  TTTACAATAG TCACAAAATT TTTTGCCGT CCGAAGTGCC CTAAGTCCGA GCCAATTTTT
961  TCAGACATTT TTTAGATCTC GCTTCTTATC AGGTTTCAAT TGAGGTTTGT GTGCGGATTT
1021 CGCTAAGTTT AGTACACAAT GTAAGAAAAC AAAAAAGTTT GGAAAAAAT CCGTCAAAAA
1081 AAAATTTTTT TCGTCGGTGC TCAAAAATC TTCAAAAAAA AATTTTGTCT AACAGAAAAC
1141 ATAGCTTTTT CGAAATATTT TTGAGTTTTT GGAGTATTTT TCGAGATCCA AATGTTAAAT
1201 TGAAATGTTT TGTACGTGTA AAAATAGTTT GCACATGGTT ACATCATTTT TGTATGAAAA
1261 ATCAAGAATT TTTGACAAAA AATTTTTTGA AGATTTTTTTG ACGACAAACC AAAAAAAAAA
1321 TGTTTTGGAC GAATTTTTTT CCAAATTTTT GTTGTTTTCT AATAATGTAT TTTAAACATA
1381 GCAAAATCCG CACACAAGCC TTAAGTCAA GCTGAAAAGA ACCGAGATCA GAAAAATGCC
1441 TGAAAAAATT GGCTCCGAGT TAGGACACTT GGGGTGGTCA AAAAATTTTG TGAATTTTGT
1501 CAAATGAAAG ATCATGGTTG ATAACATAAA TTCCCAAAGT TTCATAAAAA TCGATACACA
1561 GCGAACAAAG TTATGATTTT TGACCCGGAA CTTATTTGGA GACCTAATAA TAAACCTTCA
1621 ATTATGAATT CCTATTGAAT TTATATTAAT CTCATGCTTT ATTTAGACAG TACAAATTAC
1681 CCATTGTTAG TATGGCGTAT TTCACCAGAT CACTTTTTTT GGAAGTTAGT CTTGCAGTCT
1741 TCAATAATAT TGCATTTACT GTGCTTGTTG AATTAGAAAA TAATTTTATT AGTTAGTCAT
1801 TATTAATTGT TAGTTATAAT AGAAATTCGC AATGTTGTCT GTAAAAAATC CTTTGAGCTA
1861 TTCATTTTAA CAGGCTAATA AAAAAAAGT ATACTTTAAT TATATTAATA CTTCAACTTT
1921 CTTTTGGCCC CAACATCTCC TTCTAAATAT CGTTGAAACA AACTATTTAC ATAATAATGA
1981 CATAATTTT TATTTTATTA CTTGATTACT TAGGCTATAA AAGTATCATT AAAGGTGGGG
2041 TACCGAAATT TGAGACTTTG CTTTTTTAGA CCCAAAATGG TACAAAATAA CCAAATTCG
2101 TAGTGAGACG TTCTGAAAAT GTTCCAAAAA AAAGTTGTGG CCCCTCAAAG TTTTGAAAAA

```

2161 TGGCCAATTT TTAGCTAAAA TCTCATCAAT TTTGGCAACT TCTCGGTGTC GCAGTGATGC  
2221 TAAAAATAGA CCATTTTTTC CAAAACCTTG AGCGGCCATA ACTTTTTTTT TTGAAAAATT  
2281 TCCAGAACGT CACATTACAA AATTTGGTAG TTTTGGACCA TTTTGGCCTT AAAAAAGCAA  
2341 ACTCTCAAAAT TTCTTTAATA TTTTAAATGA CTCCAAACTT GCTCCCTGAT TCCGAATATC  
2401 TAAGTGAAAA AATTTAAAAA ACTTTCCCTG ATTTTATATT TGAGCTTGAA ATAGTGAATT  
2461 TCATTTGTGC CCCGGTTTTCT TTTTTCAAAT ACGCGCCGAA ATAAATTTTC CTTGGAGCGC  
2521 GTTTGCTTCA TTTAATTTTC TCCATATATT TCCACTTCTT TCAGCTATTT TCATTCAATTT  
2581 TTACACGGGG TTCTGGCCTT TCTCATTGAA TTTTCGCAA TACATCAATT TACAATAAA  
2641 ACGAGCCGCG ACGCGACACG CAACGCGACA CGCAACGCGC CGTAAATCTA CACAAAATCT  
2701 CTCCGGCCCC AAATGACCTA GTTCGGCAA CTCTGCCATT TCAATTTATG AGGGAAGCCA  
2761 GAAGCCCGTG TAAAAATGAA TGAAAAATG TGAAAAACTG AAAGAATGG AAATATATGG  
2821 AGAAAAATTA ATGAGGCAA CGCGCTCAA GGAGAATTTA TTTTCGGCGC TATTTGAAAA  
2881 AAGAAACCGG GGCACAAATG AAATTCGCGA TTTGAAGCTC AAATATAAAA TCAGGGAAAT  
2941 TTTTTTGAAT TTTTTCACAT CGATATTCGG AATCAGGGGT AAATTTGGAG TCATATGAAA  
3001 ATATTTCCCA AATTTTCAGTA CCCAACCTTT AATATACAAT AGCTTTGTTA ATGATGGTTA  
3061 TTAAAATGTG AAAGGAAATG TGAATTGACA AAACCTTTTG CTCATTCCTT GTGATATTGG  
3121 TATTTACAT ATCCTTTTCT ATAAACTGTG TGTATAACAA CACATTTTCA AATAAACACA  
3181 CGTGGTAGGC TAGATTTTGA TAGAAAAAAT TGTTAAAAAT TAGACCCATA GGCATAGTTC  
3241 ATAGGTTTAG GCCCAATGTC TTAAGTCTTT AAGATTAGGT ACAATAAGAT GTGGATATTC  
3301 GGAAAAAAC TGTCTGTAGA CTATAACTTT TCTACAATA TAGTTACT GAAAAAATAT  
3361 AGGGTTTTCA AACGGAATTT TAATTTATTT TTGTTTCATCC TATAAAATTT CCAGCCAAAC  
3421 GCTGACACCG TCTGCTGCTA CCACAACCAG GTCGACTATT ACTGCTGCCT GGACACTACC  
3481 GAACAACAAT GCCCAGACTA CCATCAGGTT ACTGTAGTCA TTCATAACAG TTTCCCTCAG  
3541 AACCCGTTTG CGTTGAAGAG CTTCTTCTTC AAGGATGGTA TTGAGGATGA TGTGAGTTTG  
3601 TTTGACTAAG AACTTTAGTC CTAACAACCA AAATTGCAGA TAATTGATGC AACATTTGGC  
3661 CGTGGAGATG AGGGACTTCA GAATGAAAAC GGGCTTCTTG TACGTCATCA GCAACCTCAG  
3721 GGAAATGAGA TTTTGAAGCA ATAAGAATTA ATCACGACAT GTGTAATTTA CATTGGTGT  
3781 GACTATTTTG AACATATTAA TAATTTATTT TTTAATAAGA ATGTTAAAAA ATAAAGTAAT  
3841 AACGAAATGC TCAAAAATGC TCAATTTGCC TTAGAGCACC CTTTGTTC ATATCCATCC  
3901 AAATCGGTAT TATACTAATG GGTATGTTCA TTCCAGCTCA AGTCAGCATG CAGGTTGGAG  
3961 CAATAGAAAT GATCGGCTTC CTGGCACACG TTTCAAACGG TTTAACGCCT CTGAGAAGTT  
4021 TTTGTGTCGA ATTTCAATTT CAACAGGTAC TTCAAAGGT ACAACAGGTA CTAGCCTTGC  
4081 GAAAAAAGGG TGGCACAAAC ATTTTGAAT TTTGGTAGAA TTTTCATAGA TTTGGATTCT  
4141 AAATTTTTTA AAAATATTAT TGGTACGTTT TTGGACCAAG ATGTCAATTT TCAGACGCGC  
4201 TAGAGTTTTG GATTAATATA CGCACTGAAA GCCACAAAAA ATCA

//

LOCUS 28 2446 bp DNA linear PLN 25-FEB-2004  
ACCESSION 28  
VERSION GeneMark.hmm v3.0 self\_training  
ORGANISM C.elegans  
FEATURES  
CHR ---  
CDS join(500..589,747..941,1749..1946)  
/translation="MNGNFGQYINNCDNLDEQISVTDIFIKTLKKVESDTLNGRESV  
SSSSSTDKLSKLPEDGRRVDDKNSANDLLQTMKRKFVHRATEP IFHALPEAQERRLV  
SGRDCGTSSSSISLGRKPKVFEGGCGANDDLLKMP SFESTLDRKTDSDPTLSKTHKY  
HVS"

ORIGIN  
1 TCAACAGTTA AAATAACGGA CGAATTTTCAG AAATCTGGAA AACGTTATCA TCGTAAACTT  
61 ACAAGTCTAA TAATACAATA GATTTTTTAT CGTAACTTTT ATTTTATATT CTTTGTGACC  
121 TGGCATCAAT AAATCCAATA AACCTCTACT CTCTCAGAAA TTTATTACCA ATCATTGTGA  
181 TCTACAAATC AACATCATTT TATTCACACG CTCTTTTCGT GGGATTTGCG TCAATCTGAG  
241 TTGTTATTTG AAGAAAGTTT ATGAGAAATT TTTGTAATTT TATTAGATTC AAGGCACGCC  
301 AAAAAAAGC GGTTGAGTGA AATACCAATG TTTCCAACCT CACCTGTTTC GTTTTTGCTC  
361 GCCCTCGTTT TAAAATTCAT TCCGCTATAA TTGATTTTCA ATTTTTGATT TCTATTTGTT  
421 TATTACTTTA TGATATTATT CAGTTATATT TCGCCCAATT CATCAAACAG AAAACAAAGT

```

481  GCGGGGGAAT  CAAGGAGAAA  TGAATGGCAA  TTTTGGCCAA  TATATTAACA  ACTGTGACAA
541  TTTGGATGAG  CAAATCAGTG  TTACAGATTT  CATTAAAAC  CTGAAGAAAG  TTAGTTTTAA
601  ATTA AAAAATG  CAAATTACCG  TATTTCTCT  ATCATTCTTT  TTTACAAGAC  TAATCGTCTC
661  GTATGGGCGC  AAGACTATTA  AAACCTGAAT  TATTAATAGA  GATAACGAAA  CTTTTTTACT
721  TTTACATACA  TTTTTCGTGG  CTTTAGGTTG  AATCGTCCGA  CACCCTGAAT  GGTCGAGAAA
781  GTGTTTCATC  AAGTTCATCA  ACCGACAAAC  TTTCAAAAT  GCCGGAAGAT  GGTCGTAGAG
841  TTGATAAAAA  GAACAGTGCA  AACGATTTGC  TTCAAAACAT  GCGCAAACGA  TTTGTTCACC
901  GAGCGACGGA  GCCAATATTC  CACGCCTTAC  CAGAGGCGCA  GGTAAGCAGG  TGTGTGCCTC
961  CTCTAACTGC  CTTCTATTTG  TCGCATGTTT  TTGATGTTGT  TGTCTTTTTT  AAATGGAATT
1021  TGAAACTTGA  ATCTAAAAC  TATTTTTGTC  TATTCAAAAC  CACACACCAA  TAGGAAAAC  T
1081  GGGATATTTG  CCAATTTTTT  GCCAATTTTC  GTGAAACTCA  ATGTAGAACA  ACTTTTGCAT
1141  TCAAACCGTA  AAGTTTAATG  TTTTCCGATT  AAGAAACTTC  AGATTATTGT  CTCTAATTTT
1201  TATATTTTAT  TCCTGTTATG  AATATATTTA  AGACTCAAAA  TTTTCGAATA  ATTTTTTTTT
1261  CAAATTTAGT  ACCAACTTGA  GCAAAAACAC  ATCATAGTCT  CATTGTATT  TCAGCAATGA
1321  CTTCAATAAA  AAGTGATATT  CAATTGAATT  CGGTTTCTTC  AACCAAAAC  GTGAAGTAAA
1381  AACAGTTTGC  TTTATGATTT  TTGATACATA  TTTGTTCTAG  ATAGTATTAA  TTTTCAAAAA
1441  CATTCCAGAG  CTTACCATTA  GATGTTAGTT  ATTTAGTGTG  CCTATAGTAA  AACACTTAGT
1501  TCATTTACCA  AACAAAAC  CACCTTTAAG  TACCAAAATC  TCAATCAGTA  CAAATTTCT
1561  GATAAAGTTT  GAAAATATAT  TCATAATTTT  ACTTACCATC  GGTCATTTTT  TAATTGGAAA
1621  CTCTTAAAT  TACTGTACTG  AAGCTTGTA  TGAAAAACCT  GTTTCCAATT  TCCCTCATTT
1681  CCTGGTCCAC  GAGTGAAATT  CCGATTAATA  CTATCAAAAC  ATCTCAATA  ACTTGTTTTT
1741  TGTTTCAGGA  ACGTCGACTC  GTCAGCGGAA  GGGACTGCGG  CACTTCCTCC  TCGAGTATCA
1801  GCCTCGGCAG  GAAGCCGAAA  GTTTTCGAAG  GAGGATGCGG  TGCCAACGAC  GACCTCCTAA
1861  AAATGCCAAG  TTTTGAGTCG  ACGTTAGACC  GGAAAAC  TTCTGATCCA  AACTTTCTA
1921  AAATCATAA  ATACCACGTC  TCGTAATCTT  TCCTATTCTT  AGACAATCAT  CTAGTCTACG
1981  ATTTCCATAT  TTCTCGAACA  AACAGGCTAA  TATACAATA  ATGCATATGT  TCATGAATAT
2041  TTAATATAAA  TTTTCGTTTT  TATTATGTTT  TCTCCATTTT  CTCTCCGGCT  CCACATGCTT
2101  CTAATAACCA  CTTTTATTCT  CAATTGTACT  TAAAAATACT  ACGTTCTTTT  CATAAACGTA
2161  CTTTGTCTGT  TACATTACAA  TTGGTTCTT  TTGCATTTGC  ATCTGACTCT  GCCATTCTGT
2221  TTTTCTCTCT  TTTTTCGAAT  GTTAGATCGT  TGCTGTCGGA  AAGGAAAATG  AGATATGAGT
2281  GACAGAAGAG  GGATGTAGTG  GACACAAGAG  GGTGAGAGAA  ACCAGTTTGT  GGCCGGTACT
2341  CTAACGCAC  CGGACATCTT  CTTCGAATTC  TACAAAGAGA  CGTCATCTTT  TTCAGCGGCT
2401  GGCTACAAAA  TCGACTGACA  TGATTGTTCT  TTCCAATTCT  CATTTT

```

//

```

LOCUS      29      3449 bp      DNA      linear PLN 25-FEB-2004
ACCESSION  29
VERSION    GeneMark.hmm v3.0 self_training
ORGANISM   C.elegans
FEATURES   CHR ---
CDS
join(500..586,1706..1750,2155..2285,2330..2407,2714..2800,2859..2949)
      /translation="MKPHLCDQPMNLTRRACCQLVLFNDTERVPPCSTSMPLPSTTS
      HKPPIYLVPEVEESEDHLTFVVGIFMLMVIALAFSIGLSKMTKPKVSI SRYNTSNSS
      YDILMWLSSNPTNRSSMLLLLLRSMCRPTPTPDSSVSVVSSNIPLLP SYQCASQSTTA
      NTPPPYSATSHLVA"

```

```

ORIGIN
1  GGAAATCAGA  AGAAAAATA  ATGCAATTTA  AAGTTGAAA  GTGCAAAAAT  TTCAGTGTCA
61  AAATAACCG  AATCAAAAAT  GACTTTTTCG  TGCCAAGACC  AGAACTTTCC  AAAATACCAA
121  TAATTGAATA  AAACGTTTAG  TTTCTCGTGT  CCACCCCGGC  GGGCGGGTGT  CACTAATTGT
181  CAGTGGCCTG  GTGTGACATC  AAAAAGTTTG  ATTTCAATTGT  GGCCGTCGTG  GGGTCTCCC
241  ATTTCTCTTC  CTCTCTTTC  CAACACCACA  AACGGCGTTT  TTTTTCATTT  TCTGCGACCG
301  CTTCTTCTT  TTTTTATCC  CACCGAACGT  TATTTTTTTT  TGCATAACTT  CTTCCAGTTT
361  TTTTAGTAGT  ATGAAGACAA  ATTGTTGTGT  CTTCTTGTCC  CCCCATCCTT  CCCGCCGAAA
421  AACATAATA  AATAATTCAA  TTACCGTCTA  GCCGCCGCTT  CTTGTCTTAT  TTTGAAGAAA
481  ATGAGCCAG  TTTTACAGAA  TGAAGCCTCA  TTTATGTGAT  CAACCAATGA  ATCTTACTCG

```



541 GCGAGCATGC TGTCAACTTG TACTATTTTT GAATGATACT GAACGGGTGA GTATATTATA  
601 ATTGGTATTT GTAAAACGAT TTTTAAGTAA TAGAATGTAA TAGAAAAACT GATTCTTACA  
661 TTTTTTTTTT CTTTTTTGAA GGAAAAACGT TTTAGATAGG CACAAAAATG CATATTTGCT  
721 CAAAAATACG GTACCTAGGG TCTCGACGCG ACACATTTTA AAAAGAATAC TGTAATGTTT  
781 TTAATCGAGT TTTCATATTT TTTTACGAAA AAATTTATTT AATTATTTAA AAACATATAA  
841 ATCGCTATAA AAAGCTGCGA AAAATCCTTG AAATTCCGAA AAAACAAAAG TTTGAAATTA  
901 CAGTAATTTT TAATGACGTT TGGTTTTTTG CACAAATCTC AAAACTTAGC GTCTGGATAA  
961 TACAAATCTG CGTTTACTGG GTCAACATCT GGTTTTACGA AAAAATGCGG AAAATATGTG  
1021 GTAGGCAGGC ATAGGAACGC CTGGAGATTT AATTTCTTGT CTATCAGTGT TGTTTTATTT  
1081 GTCTGAATAT GTTTTTTTTT CAAAAACTTT CGCGTAAAGT ATGGTGCATT GTCATTACTG  
1141 TACACACCAA TGTGATGCAA CATATCCATA TTTTACGCGA AAGTTATCTA GAAAACAATG  
1201 GTTACAGCCA CAGTAATAGG CATTTAAGTT TACAGGTGTG TCAATGTCTG CCGCCCTGCC  
1261 AACCGCCTAT TTTCTGCATT TTGGCGTAAA ATCTGGTTTT TTATGGTGTT ATTTTTTCTT  
1321 AAAAAATGCC AACAAAGTAC AAATTGGACA TTCAAATGCG GAACTTTCTC CAGATTTATA  
1381 TGTTTACTAT AAACACAATA AACTTTTCAA TCCACCGAGA CTACTGTAAT TATCATGTTT  
1441 TGGTGCACAC AAAACAAATG CCTGTAGTCA TATCGCGCTG ACCCTTCTCT GAGCCCCCGT  
1501 CGAGCTTCTC TACTCTCTTC TCCACATACA CACTCTCTCT ATCCCAACGA ATAAGGAGAG  
1561 TATTTATCAT TTGTGAGATT TCCCTGTCAG GGGAAATCCCC GTGGGATCAT CCCCACATCT  
1621 TCTCAAATCT CCCCCGATTT TTTGCTTTTT TGTGTTGGAA CAATCATAAT TGATGGGTGG  
1681 TTTTTTGACG TGTATTTGGT TTCAGGTGCC GCCTTGCTCC ACATCAATGC TCCCATCAAC  
1741 TACGAGTCAT GTAAGTTTGG CCCCCATCTT TTGCTAGGTG GCCTAGAAAA AATGAAATCT  
1801 CGGGCACCTT TTGAAGCTGA CCCAAAAAAT TATCTCAAAA GGTGGTTTTT ATAGTCTCGT  
1861 CAAACCGATT TTAAGGGT AGCCGATTTT TTTAACAGTT TTTTTTTAAT TCTTGATTTT  
1921 GTATTATTTT TTGCCGACTA TTTTGAAATT AAACATTTTA AAAAGTGAAA CAACTTGAAT  
1981 TTTTAGTTTT CTACAGAATA TACATCGAGG TTTTATGTAT TTGAAAAATG AAAAATAACA  
2041 GTTCAATTTA AATTTTGAGT TTAAGAGCT TTAAGCATG CATTTTGGCT GGAAAAATGG  
2101 TTGAAAAATG AAAAGAGCCC TTTCCCTCGT GGAGTACAAT TCAAATTTTT CCAGAAACCA  
2161 CCGATATATT TAGTGGAACC TGTTGAAGAA TCCGAGGATC ATTTGACATT TTTCTTGGC  
2221 ATTTTTATGC TTATGGTTAT TGCATTAGCA TTCTCAATTG GGTTGAGCAA AATGCAAAAG  
2281 CCAAAGTAAG ATTTTTTGAA GATTCTGAAA ATCAAATACT TTTTTTCAGA GTATCAATAA  
2341 GTCGATATAA TACTTCAAAC TCTTCGTATG ACATATTAAT GTGGCTTTCG AGTAATCCAA  
2401 CAAATAGGTG AGTTTAGAAC AATAAAGCCA AAAATGTCTA TGAGGCCTAA AAGGCCTATA  
2461 AGGCTTATAA GGCCTATCAA GCCTAAAAGA TCTATGAGGC CTATGAGGTC TACAAAACCG  
2521 GTAAAGTCTA TATGGTCTAA AAGGTCTATT AGGCCTAGAA TCTTCAGATG GTTTATTGGG  
2581 TCTGGGGCTA TGAGGTCTAT GATATCCATA AAGCCTATAA GGCTAAAAGG TCTATAAGGC  
2641 CTATAAGTAT ATATGGTCTA TAAGATCTAA ATGGTCTATA CGGTCATCTT GAACTAGAAA  
2701 ACTTTTAATT CAGATCCTCC ATGCTCCTTC TGCTCCGATC CATGTGCCGA ACTCCAACGA  
2761 CACCGGACAG CAGTGTCTCA GTGGTATCCT CAAATATCCC GTATGTTTTT TATTTTCTTC  
2821 TCTTCTATTT TCCTGTTTAA TCTGATTAAG AACTTCAGAC TGCTCCCATC TTACCAATGT  
2881 GCCAGTCAAT CCACCACAGC CAACACACCA CCTCCTCCCT ATTCAGCCAC GTCACATCTG  
2941 GTCGCTTGAT GCCTTTGATT TTTGAAATTT TGTTTTCTAC GGGTTCCCCC TGCTGTGTTT  
3001 GCTTTGAATT ACCAAGTCCT TATTAAAGTT ATAAAACAAT TTCCAATTGC CCTGTAGTTT  
3061 GATCTTTAAA AAATGGGCGG GAAAGAAACA CAAACCACAT CGGATTGAAA TCCGATATTT  
3121 GAGGATACTC TTCATCTGCG CACCATCACC ACCGATTGGT TTAGCTCTTT GAGGTTTTTT  
3181 GTGTTCTAAT GTGGGAAAAA ACGAGTGGAA TTGAATGACA ATGACGTTGA AAATCAAACA  
3241 ACTGAATACT CCGAACATGT TTTGTTTTCT ACCAGTAGAG CTGAGAGAAG TGCCGAAAAA  
3301 TTCTCACTTT TTCGTCGTTT TTTTTTTGAA AAATTATATT AAACATATCG AGAAATATTG  
3361 TTAATTCTTG AAAATAACAT TATTTTCCCT TAATTGCCGG TTTGTCGATT TTCTGGAAT  
3421 TTTAATTTTC CGCAAATTGC CGATTTGCG

//

LOCUS 30 1789 bp DNA linear PLN 25-FEB-2004  
ACCESSION 30  
VERSION GeneMark.hmm v3.0 self\_training  
ORGANISM C.elegans  
FEATURES CHR ---

CDS complement(join(500..627,675..860,1016..1136,1182..1289))  
 /translation="MGDGANVFNTFSFNKWADGKREEEIDKESRRRRRAEQIKRLKER  
 LRKERALREAQGDGDLDLALIEALQRGEVINIPQQTDTVIVTEPIEETS KRKRGPV  
 NLSDDYIFNEINLYANRSIGLNNIAEPVDIAPVPLQKLDPLSFRYNRRNQNNEMIAN  
 EEQIVQHRPNNFKFNRMIQDIQK"

ORIGIN

1 TAAATATGAA CTCGCGGGCG CGGTAATCTT TTTTAGGTTG GCGCGAGTTT TTGCAATGCA  
 61 AACGCGCTCC ACCGCAAATC TGAATTTTTC AACATTTTTC GCCAATTTTT ATCCTTATTT  
 121 TTTTATTTTT TGCAATATTT CGCTATTTTT ATTTGTTTCT CCCACCAAAA GCGCACATTT  
 181 TTAAATCAAA ATACGATTAA ATAAAAGTAA TATAACTTTT TAAATAAGTC CAAATAACCT  
 241 TTAAGCAAAG TAAGGGTCGA ATCTGAAACT ATTTCTTGAA AACAACCTTT TTGTCTCATT  
 301 CATCGAAGAT TGGTTGTATT CGGAAGTGAG AGGTTGACAA GTTTTTTAAA ATCCATTTTA  
 361 TTAATTATTC CGAAATACAC ATTTAGTTCC AATAGTTTCG AAATTTAAAA CGTTTGAGTC  
 421 ATCCTTCATT TTTTCTGCCT AGTTGCTGTG ATCATTGGGA GAGAGTATAA GAATTTATTA  
 481 ATCATTTCGA AAAAAAAAAAT CTTTTTGGAA TATCCTGTAT CATTCTATTA AACTTGAAGT  
 541 TATTCGGCCG GTGTTGAACA ATTTGCTCCT CATTGGCGAT CATTTCGTTA TTCTGATTTT  
 601 TTCGATTATA ACGGAAGGAG AGTGGATCTG AATTTACAGT AGATTTTAAA TTGGTTTTTC  
 661 TTGAATTTCC TCACCTAATT TTTGTAGTGG AACAGGCGCT ATGTCCACCG GCTCTGCAAT  
 721 ATTGTTCAAG CCGATCGAGC GATTTGCGTA GAGATTTATT TCATTAAGA TATAATCATC  
 781 TGACAAATTA TCTGGCACCC CTCGTTTTCT TTTAGAAGTT TCCTCGATAG GTTCGGTTAC  
 841 AATTACATCG GTTTGTGAG CTGAAATAGG ATCCAAATTA TCAAATATCC TTCTCTATTC  
 901 ATGTTATAAA TCTTGGTTGT AAGAACAGTT AACATAATTA GTAACAATTA GAAACCTGAT  
 961 GTGATTAAGA TTCTATCACT GTTTTTAAAT AGTAAAATAA ATAATTTTGA CATACGTATA  
 1021 TTGATAACTT CTCCTCTTTG TAACGCCTCA ATCAATGCAT CCAAATCAAG ATCTCCATCA  
 1081 CTTGAGCCT CACGCAGTGC TCTCTCCTTT CGAAGCCTTT CTTTCAGTCG TTTAATCTGT  
 1141 CATTAAAGCCA CTAGTATACA CTTGGGAGAG CCACCACAAA CCTGCTCGGC TCGTCGCCGT  
 1201 CTACTTTCT TATCTATCT CTCTTCACGC TTGCCGCTG CCCATTTGTT GAAGCTGAAT  
 1261 GTGTTGAACA CATTGCGACC GTCTCCCAT GTACTGTTCT GTAAATATAT AAATGAGCT  
 1321 AATGAGAAGA ATACGTACTA GAGCACACG CTTTTGCGAA AAATGATAAC CAAAAGCTCG  
 1381 ATGTGCACT CACTTTTGA TATTTTATTA AAGCTTTTGA CGTCCTTTTC TCTTTTGTTC  
 1441 GCCTGTTTGA AATTTTTGAA AACCAGGAAA CCATGATGAT TTTAAATGTT TAATGATGTT  
 1501 CTTCTAACAG CATGCCACG CGTTTTGCCT GAAAATTCGA ATCAAATTA TTTTCAGCCT  
 1561 TTTTATTGTT TAAATATCAG AAAAAACTG GCTGTTCACT AATCACGTGA TGCCTGTGTT  
 1621 TTCATCTCC CTTCTACACT GAAAATATTC TATTTTAAGG ACATTTTCAG TCATTTTCCG  
 1681 GCGCTGTTCC CTCTGTCGTC GCCACGTCCA GTACACCGAA ACCGACGACA AATCGATGAG  
 1741 AGCTCTACGA CCGCAGGCGC GATGGATTGT GCTATTGCAG TGAGAGAGA

//

LOCUS 31 1668 bp DNA linear PLN 25-FEB-2004  
 ACCESSION 31  
 VERSION GeneMark.hmm v3.0 self\_training  
 ORGANISM C.elegans  
 FEATURES  
 CDS join(500..553,611..702,760..1168)  
 /translation="MFLRLSRPHHDTINILTSTYQSLVNSARILFVEKGYQAVSID  
 EISGKAACYKQLIMIDAYITTKTDLTNGWSALESIFEHYLDYIIDNNKNLPIQEV  
 MPIIGWNELEKISLEYITGKVNIVSKLIQENQLKAYDDDVLKNNLNGWFMHIAIHA  
 KNLKELADKKGQFIAIYRGFLLSLKDK"

ORIGIN

1 GGCTGCAACC CTACTAGCTC AAAATTTTATT CACACATGGT TACGCTTTGG GGAAATTATG  
 61 AGGGGATCTC TCAGTGCATT GCCTCCAATT CCCATAATTT ATTACGCCGA TAATAACTTG  
 121 GTGTAACCTT AAAAATGTAC TTAAATCGAC GTGTAAGA TTTGTTGGGAA TCAAATTGAT  
 181 ATTTTAAATGC GATCTCAAGG ATAGTTTTTT TCGTCAACCT CAACTCAACA GCCGCTTTTCG  
 241 TCAAACGACG AGCACGAATA TAGCTAGCCA GTGTGACCCC TGTTACTTTT TTGAACAGCC  
 301 GCTGAAAATA CCACTTGGTA TAACCCGCTT TATTCGCCAC ATCATCAAGC AGTAAAGACT  
 361 GATCTAAATT ATGTTCAATC CATAATAGAA CATCTTTGAT AACCGTTGTA TGAAACTGCT

```

421 TATCATCATA TCTTAATTGG ATGTTATTAG CTTTATTTTG ATAGCGAGAA TGCTGTTCAA
481 TATACATAAA ATAACCTAAA TGTTCTTAAG ATTGTCACGA CCACATCATC ATGATACCAT
541 AAACATACTG ACGGTATGTT ATTTTAAATC TATCATGGAA AATAAAAATC ATCAACAAGA
601 AAATTTTAAAG AGTACCTATC AATCACTGGT TAACTCAGCA CGAATATTGT TTGTTGAAAA
661 AGGCTATCAA GCTGTTTCAA TAGATGAGAT CTCGGGAAAA GCGTTGGTGA CCAAAGGTGC
721 CTTTTATCAT CACTTTAAAA ATAAAAACA ATTACTCAGT GCCTGTTATA AGCAGCAATT
781 AATTATGATT GATGCCTACA TCACAACAAA AACTGATTTA ACAAATGGTT GGTCTGCCTT
841 AGAAAGTATA TTTGAACATT ATCTTGATTA TATTATTGAT AATAATAAAA ACCTTATCCC
901 TATCCAAGAA GTGATGCCTA TCATTGGTTG GAATGAACTT GAAAAAATTA GCCTTGAATA
961 CATTACTGGT AAGGTAAACG CCATTGTCAG CAAATTGATC CAAGAGAACC AACTTAAAGC
1021 TTATGATGAT GATGTGCTTA AAAACTTACT CAATGGCTGG TTTATGCATA TCGCAATACA
1081 TGCGAAAAAC CTAAAAGAGC TTGCCGATAA AAAAGGCCAA TTTATTGCTA TTTACCGCGG
1141 CTTTTTATTG AGCTTGAAAG ATAAATAAAA TAGATAGGTT TTATTTGAAG CTAAATCTTC
1201 TTTATCGTAA AAAATGCCCT CTTGGGTTAT CAAGAGGGTC ATTATATTTT GCGGAATAAC
1261 ATCATTGGT GACGAAATAA CTAAGCACTT GTCTCCTGTT TACTCCCCTG AGCTTGAGGG
1321 GTTAACATGA AGGTCATCGA TAGCAGGATA ATAATACAGT AAAACGCTAA ACCAATAATC
1381 CAAATCCAGC CATCCCAAAT TGGTAGTGAA TGATTATAAA TAACAGCAA CAGTAATGGG
1441 CCAATAACAC CGGTTGCATT GGTAAGGCTC ACCAATAATC CCTGTAAAGC ACCTTGCTGA
1501 TGACTCTTTG TTTGGATAGA CATCACTCCC TGTAATGCAG GTAAAGCGAT CCCACCACCA
1561 GCCAATAAAA TTAAAACAGG GAAAATAAC CAACCTTCAG ATATAAACGC TAAAAGGCA
1621 AATGCACTAC TATCTGCAAT AAATCCGAGC AGTACTGCCG TTTTTTCG

```

//

```

LOCUS          32      2375 bp      DNA      linear PLN 25-FEB-2004
ACCESSION     32
VERSION       GeneMark.hmm v3.0 self_training
ORGANISM      C.elegans
FEATURES
  CDS          join(500..590,640..724,1287..1344,1397..1522,1678..1875)
              /translation="MIYSIVFGILIMMESTVLGCPPQPNGNCYYGQYMLSNSQGGFQ
              NQQCGSAINRDWCAVSYQPATQQANFGCASNFPINVGGSVCGEAGFVNQQGCSMVN
              TPNGPCYFCCCKGGSCNNPQIFAREASKLPINQQMQTYNPNGYNPYSRQNYYPPIPW
              YNTASQPSNPFFLIVIIILIIIFLILSYSA"

```

ORIGIN

```

  1 AAAACACAAG TTATCTTCTA TGCGTCTAAA TTTACAAAAC TCGTCCAACC TAGTAATAGG
 61 TTTTTTTCCA AAATTTTGAA TCTCCATAAC TTTTTTGAAA AATTTTCAA ACGTCGAAAA
121 AGTCTTCAAT TTCTGCTACT CCTCCTTTTA AAAAATTGGA AAACCTTCCG ATTTTTTCTG
181 TAGATGCTTT AAAATATATC AACTCTTGGA GCCTACTTGA ATATTGAAAC TACTGTAATC
241 GTATCAAAAT GTACTACATT TGCAAAATGC ATTTGATCAA TTTAATTTTT TTCGTTCAAT
301 TTTCTCCAAA AAAATGGAAT AGTAAAAACG TCATAGAGTA CATATACAAA CATTCCATTC
361 ATTCTATACA AAACCAATTG AGGGCCGAGA AATTGAAAAA GCATACAAA AAGATGCAGG
421 CACTCCTTGA TTTACCATT TACATATCAC CTTGACAAT ATTCATATTT TCTGAACTT
481 TTTTATTGGA AAGAGGATAA TGATTTATTC AATTGTTTTT GGTATTCTTA TTATGATGGA
541 GTCAACCGTT TTAGGATGTC CACCACAGCC AAATGGAAT TGTTATTACG GTAATTGATT
601 AGGTTATTAC TGAATAGCA TGAATTAAGC TAATTTTAGG TCAGTACATG CTTTCAAATA
661 GTC AAGGAGG TTTTCAGAAT CAGCAGTGC GGTCCGCGAT CAATAGGGAT TGGTGTGCAG
721 TATCGTATGT TTTTTTTTGT TAGAAAAAAT TGAAAAATGT ATAATTGTGT TGTGTTAAGA
781 AAAACTAATT TTTGGTCATT TTTTGGTCGG GTGTACCTGT CTGCTTACCG AATATTGTAG
841 ATCTAAGTCA GAAAATTCAA ATATATACTT TTA AAAACAT GTTTTATTGA ATACCCTTT
901 TCCATAAAC TTTGAGCTCT TCACCCTTTT GAAGACTAAT TTTGGATACC CCCTCTCACT
961 TGTATGAACT GGTATTCATT ATTTGCACAC AAACATACAA CTCCAGAATG AGGTACTTGA
1021 TGTCGTTGAC TCTACAATTC ACTTTCAATT ATTCTCATCA TTCATTTCAA TATGTTTACT
1081 CTTTCTTCAT ACTACAATCA ACCATCATT AATTCGTTTT CTTCAGCCTA TCCGAGGTGA
1141 TTTGGATCAT CTTTTTTGAT GATAAAACCC AACATTGGGT CAAAAGAGAA TTTAATATTT
1201 TAGTGA AAC TGAACCAAAC TTATATATTC AATAAATATA AAACATTTGG TAGATCACTT
1261 TAAAATCCAA ATTTATTTTT CTACAGCTAC CAACCAGCAA CTCAGCAAGC AAACCTTGGG

```

```

1321 TGTGCATCCA ATTTTCCCAT AAATGTGAGC ACTAAGCTTT TAGTCGGAAA AGTGAGCTAC
1381 CGTAAACTA TTTTAGGTCG GTGGATCAGT TTGTGGTGAA GGTGCTGGAT TTGTGAATCA
1441 ACAAGGTTGT AGTATGGTCA ATACACCAA TGGACCATGT TACTTTTGTGTT GTTGTAAAGG
1501 GGAAGTTGT AATAATCCTC AGGTACGTTA TTTTTTCAGT ATGAGAATGG TTATGTATGT
1561 AGTGTCTTAA ATGGAATTCG AAAAATGTAC TGTTAAAAAC TACTGAAAAT AAGAATTTGA
1621 TTTTCACTTG CTATAACCCC AAGTTTGAAT TTTTCAATTT CCTTATTTTTA ATTACAGATA
1681 TTTGCTCGAG AAGCTTCGAA ACTTCCAATA AATCAGCAAC AAATGCAAAC ATACAATCCA
1741 AATGGATATA ATCCATATTC AAGACAAAAT TATTATCCAA TTCCTTGGTA TAATACAGCT
1801 TCTCAACCTT CCAATCCATT TTTCTTATT GTCATTATTC TTATTATATT TTTAATTCTC
1861 TCGTATTCTG CTTAAAATCA TCGTTTTTTT TTTCTAAAGA TCTCTTTTTT TTATTTTATC
1921 CCCAAATCTT GATGAGATT TCCCATTAT TGGAATTA TTTTCAATTC AATTGTTTTA
1981 AAAACCATTC ATTATGTACT AAATTTTCGAT AATGCTACAG TACAGAATGA AGATGAACAG
2041 AAAAATTGCA GTTTCAATTG ATATAACTCG GAAACAAAAC AAATGCCATG CAAATGAGAA
2101 AAAAATTTCA CAGACAAGTC TCACAGTGAG AGGAGGAAAAG AATCAACAAG GGATGATGAT
2161 GATGATGAAA AATTGAATTT CTCAAGTGAG AAAAATCTATT GAAACCGGTG GGTTTTTGTA
2221 ACTTTTCGAGG AATTTTGTGC TTAACGATGG GCGTAAAAAG AATACATTGA AATGCTAGGG
2281 AATCGGGGTT TCATAAGCTA AATCTTTTCA AAAACATATT TTAGAAAGTA AACAAACAAA
2341 GGAAATAAAA ATGAACAGAT CAAATAAATT AGCAA

```

//

```

LOCUS           33           2204 bp           DNA           linear PLN 25-FEB-2004
ACCESSION      33
VERSION       GeneMark.hmm v3.0 self_training
ORGANISM      C.elegans
FEATURES             CHR   ---
CDS                complement(join(500..724,940..1078,1346..1611,1666..1704))
                  /translation="MSSNTQNYEAFETTSIVYSSIMSAISLLIIVLNWKLSRLLISR
RHPNIIQKLRKTLIKGREAVKNGKLTPIETVILALEAGMNLEDVRLFAHVATREEI
LESVFGKLNPKFLARLTASGRFMETGYANEKIFLDLWKSESYRELVNLAQRSLCPTQ
SFHPSYIADLIDPLAPPATTVCDTKPSDPAPAAKSKRKTIIIDKMANAILNEERPLLC
SGNNDDAH"

```

ORIGIN

```

1   CTTTCATGAG AAGAGTGTCT CGAATTGAAG ATATTCCAGT GAAAGAGGTT CTAACAGATC
61  TTCTCCATCT TCATGTCAAC TATGAACTAT TGGATGTTGC CACGTATGCA CTGGAATTCA
121 TGTCATCCAC TCAGTTGGAT TATATCAGAG ATCAACTATA TTTATATCTG GAGAAGATTC
181 GACCAAGTGC AGTATCTCTA GTTGACTCTT TCCAGATTAG TGATATGCAA TTGAGATCTG
241 TAAGTTTTTG GAATAATTTT TCTATGAAA ACATGTTTTA GGTTCTTGGC CGCCGGGATG
301 GTAATGTCTA CGAGAATCTC TTCAAGTGGG CAAAGTCGAG TCCCTTGAAC AAATCTGATG
361 TTCTACCGTC AGTCGATAAG TACTTGATGC CTATGATGGA AAAGGCGAAA CTTTAAGTTT
421 CTGTTCTCAT CTGGAATTCT TTATCACATT CTTTATACAT CCATTTCTCT ATTAATAAAA
481 CAATAAAAAC AGTTCACAAC TAATGAGCAT CATCATTATT TCCCGAACAG AGCAGTGGTC
541 TTTCTCATT CAAAATCGCG TTGGCCATCT TGTCGATTAT CGTCTTTCTC TTTGACTTTG
601 CAGCTGGTGC TGGATCCGAT GGTTTAGTAT CACAAACAGT TGTTGCTGGA GGTGCAAGTG
661 GATCTATTAG ATCAGCAATA TACGATGGAT GGAAGGACTG AGTTGGGCAC AGGGATCGTT
721 GAGCCTGTAA ATGTGGAATT TAACTTCTTT ATAGTGTAGT TTATGGAAAA CCCTGGAAGG
781 TCTAATAGTA AGTCTATGAA GGTTTTTTATT TTGAAAAGTG AGAGCTTGCA TATCTCCAAA
841 AATTGTAGTT ATCAAAAAGT TGCCAACAT CAAATTCTAG ATTTTTTTCA ACTAACAAAT
901 TTTCTAAAA ACCTTCTTGT ACTTAAATCG TCAACTCACC AAGTTAACAA GTTCCCGATA
961 GCTCTCACTT TTCCACAAAT CAAAAAAGAT CTTCTCGTTT GCGTAACCAG TTTCCATGAA
1021 TCTTCCACTT GCGGTTAGAC GGGCAAGGAA TTTTCGATTC AGCTTTCCAA ATACACTTCT
1081 GGAAAATGGA ATGTGTTACT TGGAAATATT AAAACCTACA AAAATTTTAC TACGTAAAAA
1141 TACGCGCCAG GCAGCATAAC ACTGACGCAA TTCTAGTGCC TTGACGCGTT TCCAGTGCTT
1201 TGGAGCAAAT CTAGTGCCTT GGGGCATTTT CTAGTGCCTT GACGAACTTC TAGTGCCTTG
1261 ACGCAATTCC AGTGCCTTGA CGAATTTTTA GTGCACTGGC GCATTTCTAG TGCCCTGGCG
1321 CATTTCTTGT GCATCAAAAC TCAACTCTAA AATCTCCTCT CGTGTTGCCA CGTGAGCAAA
1381 CTCGAGCCGA ACATCTTCCA AATTCATTCC CGCTTCCAAT GCCAAAATAA CTGTCTCAAT

```

```

1441 CGGCGTCAAC TTTCCATTCT TAACCGCTTC CCGTCCTTTT ATCAGTGTCT TACGAAGCTT
1501 CTGTATATTC GGATGATGTC GTCGAGAAAT CAGAAGTCGA GATAGCTTCC AGTTTAAAAC
1561 TATTATCAAG AGAGATATAG CAGACATTAT CGACGAGTAA ACTATTGAGG TCTGCAAGAA
1621 AAATCGATAA ATTATCAGAA ACTCAAGAAA AATCAATAAA CTCACCGTTT CGAACGCCTC
1681 ATAATTTTGT GTGTTTGAGC TCATTTGTTT TGTGAAAAAT TACCGGAAAA CTATGGTAAT
1741 TTCATAGAAA TGATTGAAAT TTAAACGTTT GAACTGATAA ATAATTTTTT TAAAACAATT
1801 ATTGCGAAAT ATAAGTTTAC ACGTGAATAT TTTTATTTAT TTTTCCCAA CATGAATTTT
1861 TAATTAAGAG ACCCGTGAAG AAAATCAATA ATTCCTGAA AAATCAATAT TTGCTGATCT
1921 TTCCGTTTAG ATCCGTTTTT AGCTTTATCC ATTCCGGCGG GTAGAAGTCT TCCGGGTGCA
1981 TTTACCAGC AACCTGAGAG GATTACTGTA GTTTTTGGTT GCTGGCGCTT TTCTCGTGCC
2041 TACCGTACCC CATCTTTTGA CTCCAAAATA TCCCTATAAT ATGTAGTTGC AGTTTCGTTTT
2101 GCCAAGTACG ACAACCACCA TCCGAATGTA GAAGATGGCG CTGGAAAATT GTGTAGTTTG
2161 TAGTCATCCA GTTGTAGTTT GTAGCTTACC AGTTATTAGT GTGA

```

//

```

LOCUS      34      2270 bp      DNA      linear PLN 25-FEB-2004
ACCESSION  34
VERSION    GeneMark.hmm v3.0 self_training
ORGANISM   C.elegans
FEATURES   CHR ---
CDS        complement(join(500..718,767..857,914..1187,1680..1770))
           /translation="MHIYTYSFIFGLLTITCTGCIPTIPPEDVGFVERIIDQLEAL
           PDPPQSINNVLPAIQDFRNELVKANSFLISKTSEVAESPYQPFKETAAVFAGCQINQ
           IKFTSPETGKKLGRITIPPDLKCVKSLFGCDVAHLSCKVPADSKYPLISGFAKIDK
           ADWATTDLTATRADFKLDCDIFNRWTYISDIPGLEGRVYPTNEVSLCLVPIITEMNQ
           VDFQEIHYDV"

```

ORIGIN

```

1 AAAATCTTTA TAAAGAGACG AAACATGAGA GGACAACCTGA AGATCAAGAT CATTGAGAGC
61 ACCAGCTTCA AAATCATATG AAGTGATTAT ATTTAACAAT TTAAAGGAGG AGCAACGGAT
121 TGAAATAAAT GTTTGGAAAG ACTTAGCCCC GACAACCTGAA TTTCTAACG AAACCTCATA
181 AAAGTCTCAA AAATTAATAT GTTTACACGG TACATCGAAA TTTTGGTAAA AAGGAGGAAA
241 ATGCATGTGA ATTTTATACT TTTTCGTCATG TATTTGACAT AAATAGTGAA ATAAAACCTG
301 AGTTAATCCA AGCTACAACA CTTAAAAGTT AAGAAAAATA CAAGTGTTAG CTTAATTCAA
361 AATCTTTTTT ATAAAATTA ATTACATTTT CAATTTTGTA CGTTTATTGG AATGCCTTTT
421 GGAAATCGAA TTTTGGGAG CTAAAGCTAA ATAATTTGAA TCCGTCCTA CTCGTTTAAAT
481 TCTTTTAAAC AGTACTTTTC TAAACATCAT AATGTATTTT TTGAAAATCG ACTTGATTCA
541 TTTCTGTGAT AATTGGCACC AAAAGACACG AAACCTCATT CGTTGGATAA ACTCTTCCTT
601 CAAGTCCAGG AATGTCTGAT ATGTAGGTCC ATCGATTAAT AATATCACAG TCTAGCTTGA
661 AATCTGCTCT TGTTGCAGTC AAATCTGTTG TTGCCCAATC AGCTTTATCG ATTTTTCCTT
721 GAACATGTTG TTGTTTCACG TTAACGTCTA TTTGTTTGTA TCTTACAAAT CCAGAAATGA
781 GTGGATACTT GGAATCAGCT GGAACCTTAC ATGATAAGTG GGCAACGTCA CACCCGAATA
841 ATGACTTTTT GACGCACCTA TCAAGAAATT TTAAATAAAC GCAACATTTA CAGAAAAGAA
901 AATAAAAAC AACTTGAGAT CTGGTGGAA TATCGTCCTT CCCAACTTTT TCCCCGTTT
961 CGGAGATGTG AATTTAATTT GATTTATTTG ACATCCGGCA AATACTGCAG CGGTTTCTTT
1021 GAATGGTTGA TAAGGTGATT CGGCTACTTC GGAGGTTTTA GAGATCAAAA AACTGTTAGC
1081 TTTTACCAGT TCGTTTCTAA AATCTTGGAT GGCTGGTAGT ACATTGTTTA TTGACTGTGG
1141 AGGGCTTGGC AGGGCTTCAA GTTGATCAAT AATTCGTTCA ACAAACCTG AAAATATGAA
1201 ACATGTGAAC AAATAATTTC ACATTTTATC AATATTTTTT TGTGTTGTTG AAAACTAAAA
1261 ATGACAGTAA TAACCGAGCA TAACAAAGTT AAAAAAATTG TTGCATTTTT AAATAATTTT
1321 AACAGTTTTT GAAATTTTCC AAAAAAAGT GATACAACTG GTAATTGAAT TGCCGAAAAT
1381 AATTTATTTT GTTGTACAAA CTAAACTTAA AAACCTTATAG GGTTTTTTCT CATTTTTGTC
1441 CACAGATAAA CGCATTGCTA GCAAAAGTAG AGTAATCCTT TGCGCGGAAA TTCAAATATA
1501 ATTTGACCAC TTTTTTTATT TTTGCAAAAT ATAAAAAAA TATTTTATCT AAAAGTTAGG
1561 AAACCTGTAT TAACTTTTTA ATAAACAAAG TCATCAAACG AGGATACTTT TTCAAAATCT
1621 GAGTTCAAAT AACGAATTTT CTTTTATCAC TATGTATACG TTTCTAGTT TTTACCTACC
1681 AACGTCCTCT GGTGGTATAG TAGGTATACA TCCGGTACAT GTGATAGTTA ATAATCCAAA

```

```

1741 GATAAAAAAC GAATACGTGT AGATATGCAT AGACGGTCAA AATTTGAAAT CCGCCATGAG
1801 GCAAGACCAC TACGATTTGG CGGCAACGCT TGAGTGATCT AAATTTGATT GACGACAAAC
1861 GCCCTCATAA TTAAAAATAT AAGCGTTGTG ATTAATTATA ATCCTGAAGA TGATGAGAAA
1921 TCGTTTCTTG CTTTTTCACA ATGAAATAGT TTTGAGTTTT GAATAGGTTT TTCAATAACA
1981 AAACAATATC CTATAAAAAAC AATTATTCAT TTTTTCAATA ATGAATGAAA GAAAGAAGAC
2041 AAAAAGACAA AAAGACAAAA AAGCAATAAA CCAAGAAAAT AGTTGATATT AGAATTTCGA
2101 ACAATATTAA ACATCAGAAA AGATCAGTTT GAAGTGAACA CTTTGAAGA TGACAGTTCTT
2161 TTTCAAGTAG ATTTAATTTT TAACAGGAAG GCAAATGAAA TGCAGAAGCG AAAAGTAGAG
2221 GAAACATGGA CCGGAAATAT AAGTTGACAA TTGAAAAAAG CATAGGTTTC

```

//

```

LOCUS           35           3710 bp           DNA           linear PLN 25-FEB-2004
ACCESSION      35
VERSION        GeneMark.hmm v3.0 self_training
ORGANISM       C.elegans
FEATURES       CHR ---
                CDS
complement(join(500..733,1416..1534,1626..1723,1786..1853,2597..2739,3183..3210)
)

```

```

        /translation="MLTFQDLSLNVSGYAPMLFWSAISPLIRLVFLFFTFATWHTAH
        AIKCYSCANDFIVQWRHFLLKRNVDISTSDPECTSRDYISDLTQSCHSTCFVYFLN
        GTNKETGHTKVLGVGRGCSASFLTDDQHLHLGLGAHSRPSHVGEYLPDFDQFDITE
        HWCFCATEKCNSEDCFSSPFGSREYASSYIAKRLQYSSSYSHNQWRYRNTGSLCTL
        S FVFMALLLVLYTICL"

```

ORIGIN

```

1 GGC GTGGTTG ACGATGCAAC TCGACAAAAA GTTCAAGATG CTCTCCTAGA AGCATTGGCT
61 AAAATCAGCT CTGTAACAGA ACCATCAGTT CCAGAAGGAT CCATAATCTC ATCGCAGAAT
121 GCAAATGAAG ACTCCAAGAA GTTGCAGTTC AACTCTGAAG TTTTAGAGTT AGCAAGTCAA
181 ATTCTTGTGG AAAAGTATGG AGTTGAAATA CTAGATGCAG CAAACGTAGT GCTCCAGGAG
241 CTTCAATCAG AAACTACCAC CGCTGAAAGC AAGTGACAAA GATTCAACTT TTTTGAATTA
301 AAGTAGTTTG TCTGATGCTG TTAATGAATA GATTCACGAT TGTAAACTGT ATGTTGAATT
361 TTTAAAAAAA GTAAAATTTT TAAATCGGCA GTTTGCAGTT TGCCAATTTG CCAGAACTTT
421 TTGAAATCCT TTTTAACCTC AAAAAGTTAA AAGAAAAGCC ATTTGAAAAG TTTTAAATTC
481 CGATTTATTT CAGTCAATAT TACAGACAAA TTGTGTACAA GACAAGTAAC AATGCCATAA
541 ATACAAATGA CAAAGTACAT AAGGAACCCG TATTTTGATA TCTCCATTGA TTATGTGAAT
601 AAGAAGAAGA GTACTGTAGT CGTTTGGCAA TGTACGAAGA CGCGTATTCT CGTGAGCCAA
661 ATGGTGATGA AAAACAGTCT TCTGAGTTAC ATTTCTCCGT GGCACAAAAA CACCAATGTT
721 CCGTTATGTC GAACTATAAT TATTGTTAAT TGAGTTTTCA TTTTCAAATT CAACTTTTAA
781 ATATTTTTGA CAAAGTTTAC CTCTTTTTCA ACTTGAAAAA CTTAAAATTA AACAAAAGAT
841 TTATGGAAGA ATACAGATAT TTATAGAAGT TTATAGGAGT TTTTTCATGT AGAAAATTTA
901 CAGATAGACA TGTATAGAAA AGGTATAGGC ATTTATAAAA TTTTATAGAA AATTTATAGA
961 CTTTTTTCAG AAGTTTACAG TTTTTTTTTA AATTTTCTTG AAAATTCTTA AAATTTATAG
1021 AAAATGTATA GAAATTTATT GAAGTTTATA GAATTTTTTT CATATAGAAA TGTAGTAGAT
1081 AATTATAGAA ATGTATAGAA AAGGTATAGA CATTTATAGA AATTTATAGA ATTTTTTAGA
1141 AGTTGACAGA TTTTTTCTG AAACATGTTT CAGAAAAGTT TTGCAGAAAA TTTATACAAT
1201 TTTTGAAG TTTACAGAAT TTTTATTTAT TTTTAAAGCT ATTAATTTAA GTTACAGTAT
1261 TGACCAATAT TTAATTCAGT TTTGAGTATG CGATAATCTT TCGAGTCTCT CAAATGAGTT
1321 TTACAGCAGA ACATCAAAGA AAAACCAAGC ACGAATAGTC TATTGTGTAC TTCTTTTGCT
1381 ACAAATTTT CTGAATAATA AAAAAGTTGT GTTACCTGAT CGAAATCATG CGGTAGGTAT
1441 TCTCCAACAT GAGACGGCCG GGAATGAGCG CCTAGCCCCA AATGAAGATG CTGATCATCT
1501 GTTAGAAAAAC TTGCAGAACA TCCTCGGCCA ACACCTGGAA TATTAATAAAA TTGTTTTTAC
1561 AGCTCATGGA AAATGGAAAT TTCAAGAATT GTTTCGCAA AAAATCGCAT AACAAATAAA
1621 CGCACCGAGA ACTTTTGTGT GTCCAGTTTC CTTATTGGTA CCATTCAGGT AAAATACAAA
1681 ACACGTTGAA TGGCAACTTT GTGTGAGATC GGAGATATAG TCTCTGAAAC CAGTGAAACT
1741 TCTGATTAAC ATGATTAGAA AGAGGGTGGT CGCCACGTGA AATACCTGCT TGTACATTCA
1801 GGATCACTCG TTGATATGTC GTAGTTTCGT TTTAGGAAGA AGTGACGCCA TTGCTGAATT

```

```

1861 ATTCACITTTT TTTGAAACAT CTTACTAAGT TTTGTAGCAA AACCTATGTA TGAGTAATTT
1921 TAAAAAATTA TCCCCTTTTC CAAAATTTTT TTTTTCAACA TAAATTTTCC TTTCAGTTTT
1981 CGGTATTTAT GTTTTTTTTT TGAATCCTCG AATTTTCTTT TTTTTTCTCT TGCTCTCCTC
2041 GGCCTAAGAC TAAGCCCGAG CCTAAGCCTA AGACTAAGCA TAAGCCTAAA AACAGGAAAA
2101 TCCTAAGCCT AAATAGCTAA CGCTCGCCAC TGACGCCACG CTGACGCCTA ATCCTAACCC
2161 TGAGCCAAAA CCTAACCTA AGCCTAATCC TAAGACTATG ACCAAGCCTA AGCCTAATAA
2221 CCCTAAATAG CGTCAGTGCT AACGCTCCCC CACTGACGCC AAGCCTATGC CTATGCCTAA
2281 GCTTAGACCT AGAGCTAAGC CAAAGCTGAA GTCTAAGCCA AAGCCTATCC GCACTCCAAA
2341 ACATGTTCAA TCGTGTTTAA AAATTACAGT GAATTTTTTT AAAAACAATT TTAGGCAATG
2401 ATGGTTTTTG AGCAAAAAAA AAATTTGACA ATGAAAAAGT AAATGAGTAT TTAAAAAATG
2461 ATAATGGCTT TTAATTTTCT TAAGTTGAAA TATTACAGTT TGGGCCTGAC AAAATATGCT
2521 TTGATCTATT CAGGTTTACG ACAAACATTA ATATTGCAGA AAATGTAATA TTTTATAAAA
2581 TTTTTCAGAA ACTTACCCAG ACAATAAAAT CATTTCGACA TGAGTAACAT TTTATTGCGT
2641 GAGCCGTATG CCACGTGGCA AACGTGAAAA ATAAAAAGAC AAGCCGGATC AGCGGAGATA
2701 TTGCGCTCCA AAAGAGCATT GGAGCATAGC CAGAGACGTC TGAAAAAGAA AAAAAAGAGAA
2761 ATGCACTTTT TGTGAATTCG AGTGTTAATT TTGCAAAAAG TTTAGAGTGT TCGAACTTGA
2821 TGTAGAATAA TACAATATTT TGGAAAAGCC TGAATAAAAAG AAGGATGGAT AAGGCTAAGA
2881 GAAATAAAAA CCTAGCGATT AAGTAAGGCG AGTAGTAGGA GTAGGAAGCA CTGGGAGAGA
2941 GGGGGGGGGG CGGCTGAGAG AAGAGTATAA TTGCATTTTG GGCTCTTCTC ATCAACGCCT
3001 TTTTGTGCGC TGCCTGTGAT ATGGATTCAG CGAAAATAAA AGAAACACGG ATTTTCGTTTT
3061 TGTAATATTT GAAAACCTAG ATAAATAACT TAAAATCACG ACTGTAGAGC ACCTGATACG
3121 CGGAAATCGA AAAAAGGTAC GCCGTTTTTA GTAAGAGATT ATTCAGTGTT CAAATGATAG
3181 ACTTAAGCTT AGATCTTGAA AAGTTAACAT TTTGCAGCAT TATATGTACA TTTCAAGCGT
3241 TCATTATTAG TTTTTTTAAA ATTTTTATTT CTTTTTTTCA CTATTTGTGT GTGTGTGTGT
3301 TTGTGTGTTT TTTTGTGAA TTGTTGAATT ATCTGAAACT TTTTTTCTCT CTCTTTCTCC
3361 AACTGCCCAG CCTATGCCTA AGCCTAAACC AAAGCCTGAG CCTACGCCTA AGCCTAAGCC
3421 AAAACCAAAG CCAAAGCCAA AGCCAAAGCC AAAGCTTCAG CCTGAGTCTA AGCCTCAGCC
3481 AAAGCCTAAG CCTAAGCCTA AGCCTAAGCC TAAAACTAAT ACTAAGACTA AGCCTGAGCC
3541 TAAGCCTTGG CCTAATCGCG TTGATCGGCC AACAGGAACC CCCTTAAAAA TTTAAAAAAA
3601 AAACCGGAAA ATCCTAAGCC TAAATAGCGT CAGTGGCGAG TGTAAGGCTA CGCCCAAGCC
3661 AAGCTTGAGG CAACGCCTAA GCCTAAGCTT GAGCCTACGC CTAAGCCTAA

```

//

```

LOCUS      36      2290 bp      DNA      linear PLN 25-FEB-2004
ACCESSION  36
VERSION    GeneMark.hmm v3.0 self_training
ORGANISM   C.elegans
FEATURES   CHR ---
CDS        join(500..595,668..910,1368..1601,1647..1790)
           /translation="MPTCMKTNQKVIPTKNGAVATRKIEDPTSFTMSYNCVNNYLA
           DASCDPQRMTVTCCQSENGRNFVFSFAISEVSRRTATELVDSKYFEAAFNSADNRKSL
           RNACEKAKRFYMEHILYHNPFPKQRFSCVIEKSKKTKKEVSNKRSDEFVLRTRRTT
           SSISVLEGTMSLTSMSHSQLSTTTPSTP INLKQASPHPSHPVNDQSMVIQKAPTPA
           PAKTPKKGASDEQRLMNTFNTSEY"

```

```

ORIGIN
1 AGACAAGTTA TTAGAAGTTA TTACTACTACA AAAACTATCA TAAAATACAT TCGTGTAGTT
61 TGAGGGGAAA GGAAGTATAT CAAAACATGG TAAGTTAGTT ATGGATTGAA CCCCCGACA
121 ACCTAAATAT TCATGACTTT TACACAACCTG TTTTGTGTC CTCAGCTCCT GCTTAAGTTT
181 TAAAAAACT TGGATTGAAC TGATTATGAG CATTGTAGTC ACCAACGAAG ATCTCATTAG
241 ATGTTGCAGT CTCTACTGAA GCTGCTGAAA AATTTAGATT TATTTAGTTT TAGGATATTT
301 TAGGACATAT TTTAGGAAAT TGACAAAAAC ATATTTTCTA CGAGCTTTAT ACTTCAATTG
361 CGTTTTTTTT TTTGGAAAAT TTGGCAATTT ACCAAAAATT TGAAAAATAT TAAATTATCC
421 TATTTAAATT TTCACGTTTT GCTCAACCGC TTCTGGTTCG TTTTTTAAAA ATTTATTTCT
481 GTACTTACGA TTTCTAAAAA TGCCAACCTG TATGAAGACT AATTCACAAA AAGTGATTTT
541 TACAAAAAAT GGAGCTGTGG CAACTCGAAA AATTGAAGAT CCTACTTCTT TCACTGTGAG
601 TTAGACGGAT TTTGAAACGT TTATTTTGCA AACTGAAAAT TCAAAAATCA AATGATTCT

```

```

661 TGTTTCAGATG TCGTATAAATT GTGTGAACAA TTATCTTGCT GATGCATCTT GTGATCCTCA
721 AAGAATGACT GTAACATGTT GCCAATCGGA AAATGGAAGG AATTTTGTTC CATTGCAAT
781 CAGTGAAGTT TCTCGTCGAA CTGCTACAGA ATTAGTCGAT TCAAAATATT TTGAAGCTGC
841 GTTCAATTCG GCTGATAATC GGAAATCGCT TCGTAATGCT TGTGAAAAAG CAAAACGATT
901 TTATATGGAG GACTTTCGAT CTTTTCAAGA TTCAAAGAAC AAAGATCAAA GAAAACAATT
961 TTGTAATAAT TATCGTATGT CTAATAATTA AAATTGGCAA AAAAGGTCAT CTAGATTATA
1021 CCTGCACGGT GTAGTCAGTT TGGAATTTTA TGTGAGTACA GTAAATAGGT TCGGTGCGAG
1081 ATATCTTACA TGTGTACATA CTCATATAGT TCCCCAGCTG ATAGACCAGA AATTGCGAGA
1141 ACTTTATATC TTAAAGATGT GCCATGCTTT TCTATTGGTG GTCATAATA AAGTCGCTCC
1201 TTTCTAAAAA AAAATACCCG TGCCTCCTGG AAGTCAATTC TTCTGAATAC TTAAGCAACG
1261 TGCTACTTTG ATGTGAATAT CTTTTGTAAA AAATAATATT GAGAATGAAT AATAGTCTAC
1321 AGTACTCTT CCAATTCATG CACGTATCTC TAAATTCTAA TTTCCAGCAC ATTCTCTACC
1381 ACAATCCATT TCCCCGAAA CAACGTTTCT CGTGTGTTAT TGAAAAATCA AAGAAGACAA
1441 AGAAAGAGGT ATCAAATAAA AGATCTGATG AATTCTTGGT CAGAACCAGA AGAACTACAT
1501 CAAGTATATC AGTATTGGAA GGTACAATGT CTTTGACTTC AATGTCTTCA CATAGTCAAC
1561 TCTCGACGAC AACGCCATCG ACTCCGATTA ACTTGAAACA GGTGGGTCAC TGTAGTATCA
1621 AATGAAGTTC CTATATTTGA ATTCAGGCAA GCCCTCATCC TAGTCACGTT CCGAACGATT
1681 CTCAAATGGT TATTCAAAAA GCTCCAACCT CAGCTCCAGC AAAAACACCA AAGAAAGGAG
1741 CATCAGATGA GCAACGACTT ATGAACACAT TTAACACTTC TGAATACTAG GACCATTTTT
1801 ATTAGAAGAA AAATAAATTA TGAAGAGATG GAATGAATGA CATTGCACAA GCAGACTAAT
1861 CACAGAGTTA ACAGGGGGAA ATGGTATAAA AATCTTTGGA AATTTGATAG AAAAGTTTAT
1921 TAGATGCACT AAAAATTTCT AGCAATGCAG ATTTGATCCC AAGTTGTTGA AAATAAATTA
1981 CACTATGAGT ATCCCGTACA GTTCGAAAAG AAAATAGAAA ATGACTAATG TTTGGAAAAA
2041 AAATATTCTA GAAGCTACAA TTCTGAAATA GTTCGATCTT TTTCGTTTTT TTTTTGCTCT
2101 TCTGTAAAGA AATGACGTTT TCTTCGTTTT GCTGGTAACT CCATCGCGGC TACTTGTAGA
2161 GGCCATCCAC CACCGATGAC ACCAGCTTGA ACAGAAGCTC CTGTTACGAC GGCAAGTTCT
2221 GGGTCGACAC CGTAATTGGC AGACTTTCTG AAAAAGTTAA TCTAATTGTT ATCCAGATGC
2281 GAAATTTTCA

```

//

```

LOCUS          37      4237 bp      DNA      linear PLN 25-FEB-2004
ACCESSION     37
VERSION       GeneMark.hmm v3.0 self_training
ORGANISM      C.elegans
FEATURES
  CDS          join(500..635,1036..1118,1398..1625,2417..2703,3674..3737)
              /translation="MASQPELIMVDEQVVAYEVEIDSFDVKYDEEEHDGQGTQDEPF
              SHDEPSTSGYHHHYQFPNDVDPNDVYLFDEETDQIHQLDPNQLKNNEEIDDVEYIDQ
              SVPSTSSMMSLPSTVAPVQPNTYYRRKSGGPTATGNEKPNYRPLAFQTTYVNSVTQ
              YGRRVVTKRIHESIDPTSNSINEESEILQKIQMEIEILTKENDLLKKDYEAVTKRVD
              SVNMFNEAKARQKMAMEEKRLQDLTRAKCERTKLSKQLGHTQHRYQYQ"

```

```

ORIGIN
  1 CTATGGCATC CACATGAAAA AAGCCGAATG ATTACTGCTG GATGGGATGG TCTCATTAAA
  61 ATGTGGAATT AATTGTTGAT TTTTCCCTTT TTTCCCAAAA AAAAATTATT ATTTTCCCAA
 121 ATTTTGGCTC TTTTCTCAC  GAGTTTTTGT CCCATCTCTC ACATTTCCCT GTTCATTAAA
 181 AAAATTTTTT TTTTCGTAAT AATGTTTTAC TTTCTCCTGT TTCAATTATT TATTTTGAT
 241 CTTTGTTTAT TTATTTGTTT TTTCTTCCAA TTTTAAACCC TATTCTTACA GAACATTTCC
 301 GACACACGGA AATTGATAAA ATTATTTTAA TTTTTTAGCC TGAAATTTCA GTTTACCCAA
 361 TTAATGGTTA TCGACCAGAT TTTATTTTAA TTTTTTAAAG GAAAATTAGT TTTTTTTTCT
 421 ATGAAAAAAA GTTATATATT TTTTGGAAA TTTATAACTC TTAATAAAT TCAATTTTTT
 481 CAAATAAATA AAATTTTCTA TGGCTTCTCA ACCGGAGCTC ATAATGGTTG ACGAGCAAGT
 541 CGTCGCTTAT GAAGTAGAAA TTGATAGTTT TGATGTAAAA TATGATGAAG AGGAACATGA
 601 TGGTCAAGGG ACACAAGATG AACCATTTTC TCATGGTACG GAACAGTTTT ACGCTGAAAA
 661 ATTCCAGAAT TCCAAAAAAT GAAACCTAAA ATAGTGATAA AAAGGCGTTT TGAATATTAA
 721 ATTGAAGAAA AAAATCAGCA AAAATTGTTT AAAATCAAGA ATTTTAAACGG AAAAGTGATA
 781 AATCTTCTCC ACGGGGAGTA CACATGCTTC GTAAATCGAC ATATGGTCAA TTTTAAAGTT

```



841 TTGAAAATTG AAATGCCGGC AAAAAATCTT TTCTTGTTTT TTTTTCGCAA AAAATTCAAT  
901 TTTTCGAAAA ATAATTATAG AAAATTGCAT TTTTGGACCG AAAAGTCAAT AAAAATAACA  
961 GAAAAAATCG ATAAACCGTT GAAAAATTTT TTTTAAATTC AAAAATTCAG AAATTCTTAA  
1021 AATTCAAATT TCCAGATGAG CCAAGCACCA GCGGTTATCA CCATCACTAC CAATTTCCCA  
1081 ATGACGTGGA TCCAAATGAT GTTTATTTAT TCGATGAGGT ATCAATTATC CGAAATTTGG  
1141 CGATTTTTGA GCCAAAATA CGGTACCCGG TCTCGACACG ACAATTTTTG TTAAATTTAA  
1201 AAAGGTGTGC GCCTTTGAAG GTTACTGTAG TTTTCGAATT TTGCTGATTT TTCATATTTT  
1261 TTCGTTGAAA ACAAAGTAT TTATTTGTTG AAAATCAGAA AATATTATCT TCGCGTCGAG  
1321 ACCTATTACC ATTCTATTTT TGCCGCAAAA AACAAAATTT CCTTTAAAAA AAAGCTAATT  
1381 TTTCCAAGTT TTTCCAGGAA ACTGATCAAA TTCATCAGCT CGACCCGAAT CAACTCAAAA  
1441 ATAATGAAGA AATTGACGAT GTCGAATATA TTGATCAATC TGTGCCTTCC ACGTCATCAA  
1501 TGATGACGTC ACTGCCGTCA ACGGTGGCTC CAGTTCAGCC AAATACGTAT TACAGACGGA  
1561 AATCTGGAGG CCAACTGCA ACTGGAAATG AAAAACCGAA TTATAGGCCG TTGGCGTTCC  
1621 AAACGGTTCG TAAAATAAAA AAAATGTCCA TGTGTCGATT TACGCAGCTT CTCGTGTAAT  
1681 CCTCGAGGAA GAAATTCGCC AGTTTTCTGA ATTTTATCAT TAAAATTTCA TGATCTCCTC  
1741 GGGGAGTACA CGAGAAGCTG CGTAAATCGA CATGGAGACC AAATATTCGA TTTATCGAGG  
1801 TTTTTTCCTG AGAAAATCGA AGTAAAAATG TTTTAAAAAA TGAGAGAAAA CTATAAATTT  
1861 ATCGTAAAAG TATATATTTT AATGAGAAAA AGTTGTATTT TCCAAAAAAA TAAAAATTAT  
1921 AGGAAATTAT GAAAAAATT TCGTTTTTCC AAAAAAATTT TTAAAAGGAG AAAACTAAT  
1981 AGTAAGTTTA TCAAAAAAAG TTTATTTTCG TTAAAAAAA TTATAAAGA CAATTTTTAA  
2041 AAAATAAATA AATTATTGGA AAATACAAAA AATTTTGGAT TTTTCAAAA AAAAAGCCGA  
2101 AAAATTGAAA AAAAAATTGA AGAAAATAGG AAAAATATA AATGTATCAG AAATAATGAG  
2161 GATTTTTATT TACAAATAAG GAAATTATAG AAAATTATGA AAAAAAATCG ATTTTCAATT  
2221 AAAAAATAAA GTCTAGAAAA CTATAAATTC ATAAAAAAA GAAATATATT TCACAATCAG  
2281 TGAGAGAATG TTTTTTTTTT AAATTTTAA TTAAAAAAAG TTTTGAAT TATAAAAAA  
2341 TTTGAATTTT ATCTTAAAA TAGTTTTAGA AAAATTGAAA AAAATCGGTG TTAATAAATT  
2401 TAAAAAATAA TTGCAGACAT ATGTGAATTC TGTGACCCAA TATGGCCGCC GAGTAGTGAC  
2461 AAAACGAATT CACGAGTCAA TTGATCCAAC ATCAAATTC AATTAATGAAG AATCGGAAAT  
2521 TCTGCAAAAA ATTCAAATGG AAATGAAAT TTTGACGAAA GAGAATGATT TGTGAAAAA  
2581 GGATTATGAG GAGTACAAA AACGAGTTGA TTCAGTGAAT ATGGTATTTA ATGAGGCAAA  
2641 AGCACGTCAG AAAATGGCAA TGGAAGAGAA ACCGCAATTA CAGAGAGATT TGACTAGAGC  
2701 AAAGTATGAA AGATTGTAGA ACTTATTGAG AAAATTGCGA GAAAAACGAG CTATTTGGTC  
2761 CAGAAAAGTG TTGAAAAAAT GTTTAAAAAT GACTTGAAA TCCGAGAATT CATGGAAATT  
2821 GCGATGAAGA TATGCAGTTT TTTGTTGAAA ATTGAACCTA AATTTAAAAA AAAATTAATG  
2881 ATTTTTTCAC TTTTGGACA AATTTTTGAT GACAGATTTT CCTCACTTTG AACAAAAAAA  
2941 CAACTTTTTT CAAAATGATT TTTCTTCAAT TTTCTGAAA ATTGGGGCAA AACGAGAAAT  
3001 TTCTTTAGAA AATTTTAAAC ATAGATTTTT TTCAAATTTG AATTTGTATT TATTTTTTAA  
3061 TTGACTTTTG AAAGAAATTT CAAATTATTT TGCTAAAAAT TTGAACAAAT TTCTTTCTTT  
3121 TGTCTTCAAT TTTTGGTGTT TTTTCTAAAT AATTATAGGA TTTCTCAATT TTGAAAAAAA  
3181 AAATTGTGTT TAAAAATTAA ATTAATTGTT TTAATTTTGG AAAAAAATAA TTTAAATCT  
3241 GAAAAAATAA GATTTTCCAA CAAGAAAATT TGAACAAAA ATTGATAATT TTTTCATTTA  
3301 AAATAATTTA AAAACTTGTT TCGTGCTTTT TCCTTAAAAA TTTATTTTTT TCAATTTTAA  
3361 GAAAAAAACT TTATTATTTT TCTCCAAATT TTACATATAT ATGTTTCAAT CTAATTTTTT  
3421 TTTTCAAATA ATATTAATTT ATTCAAAATT ATTCAATCAA TTGGAATTTT TTTTGCAAA  
3481 TTTTLAGAAA AATCAAAAAA AAAATCTAGA AAAGCATATA ATATTTTTTT AATCAGCATA  
3541 TGTGATTAAT AAAATTTTTT TTTGGTTTTT AAGCAAAAAA TCTGGAAAAA AACCTTCTT  
3601 GGCTTTTTGT AATCTGAATT TTTGTGTTTT TTTTTCATTT TTTTTTTTAA ATCCTAATA  
3661 AATGTATTTT CAGATGTGAA CGAACGAAAC TATCGAAGCA ACTGGGACAT ACACAGCATC  
3721 GTTATCAATA TCAATGATTC TGATTTTGGG TTTAATTTTCG ATTTTTTTCT TTTTCTTCA  
3781 AAAACTGCTA ATTTTTTTT CATTGATCT CAAATTATCA TATCCATCTA ATCATTCTA  
3841 TGGGTTATTT TGTTAATTTT CTCATCGTTT TCTTGAAGTT TCTGTTTATT AACAAAATGT  
3901 TTTCTAAAAT CTTTTTTATA TAATTTGTTT TGAAAATTTA CCAGTTTCTT TGAAGTAA  
3961 TTATTTCTTA TTTTGTGAAA ATTGGTTTTT TTTAAAGATT TTATAAAAC TGCCCAAAGT  
4021 TCAGATGCTC TCTGCAGTCA GATTTCCATT TCTTGAATCT TCTCTTCGAT TCTCAGCTGC  
4081 CGCTTTCTCA ACAGTACCTG ATTTTAGTAA GGATTTGGTG CTTTCTGGCT GAAAAGCTGG  
4141 ATTTTGTGTC ATTCGTTTTG AATTTACCAT TCAATTTGAC AATTTAATTA TTTTTTTCTA  
4201 ATTTTLAGTT AAAAACTGA AAATCGGTAA AATATAT

//

LOCUS 38 2187 bp DNA linear PLN 25-FEB-2004  
ACCESSION 38  
VERSION GeneMark.hmm v3.0 self\_training  
ORGANISM C.elegans  
FEATURES  
CDS join(500..574,623..859,963..1241,1289..1401,1570..1687)  
/translation="METITAFSSTRCAVTNAVYIVNSDWIIMKLPKEFKEITGLQVW  
RERFSRLLPPQDICTEQESLNWIQDCINHCIADFKKAAHCLRIANQHIFESSESFAF  
RKVENSATRTLQFQNVENPEWLFVPTAQCKIMLPVSFLVEGDAIEVFVAQVRNQYEPR  
PLYGTHYHYEPEDHSEDFEAFRSIVFMWIRKWNPVDDDDQMRKVANKLKKFCNDSPLP  
KLFNQYTSNQNDTDGTLNSPDQIDRNFISIQLEMLRNKLFVDHVIRFDILGHNPFNTV  
TV"

ORIGIN

1 TATCTCAAGT GAACTTGAAC TGAGAGAAAG GGAGAGGGAT GGGGGTTAAT TACTGCAAAG  
61 ACTTTTTTCT GCTTATCAAT CACTAGGAGT GAGTAAACAC TGAAATTGAT CTACAGCTCA  
121 CAAGAACAGA GCAAAAAATA GGACAACACC TTCTTACCAA CCTAATATTT CCAAGTATAA  
181 ATTATCCTAT TTCATTCTGT CGAGAAAAAT AGTTAAAAAG TAGAAAATTT GTGGAAAATA  
241 TTCATAACAT CAAGTAAACA GAGTTGTAAA AACCTCAATA TACGCACGTG TTGTGCCTTT  
301 GTCGTACATT CCTCGTAGGT TCCTGGGAAT ATACGACTAA CGCCCAATAT TTGGCTTGAG  
361 AGGCGCACCA TGCGGGGAAT GTACGAGGAA AATGCGAGGA ATGTACGATG CGAATTGCCG  
421 AGCTAAACGT GCTTTTTAAC AATAACCTCA CTGGCGCTGA TCTACCTTTA ATTTAGCATA  
481 ACGTAGGGTT TGCAGGTAAG TGGAACGAT TACGGCTTTT TCAAGCACTA GATGTGCCGT  
541 CACTAATGCT GTTTACATCG TTAACAGCGA TTGGGTATTT TGCTTTGAAA ACGTTGTTGA  
601 TTTAATCTTG TTAATTTTTT AGATAATCAT GAAATTACCA AAAGAGTTTA AGGAGATTAC  
661 GGAATTGCAA GTTTGGAGAG AACGGTTTTT CCGATTATTG CCACCACAAG ATATTTGTAC  
721 TGAACAAGAG TCTTTGAACT GGATTCAGGA TTGTATAAAT CATTGCATTG CCGATTTTAA  
781 AAAAGTGCAG CATTGCTTAA GAATTGCAA TCAACATATA CCTTTTGAAT CAAGTGAAAG  
841 CGCATTACAG AAAGTTGAGG TTTGTCTAAA AGTTTTTGTC CAAATTTTTA ATTAAGAATT  
901 TGGCTTTAAT TTGAACTTAA TTTTGTCAAG ACCGGTACT ACAAATCAGT TTTTAATTAC  
961 AGAATTCTGC AACGAGAACC TTGTTTCAA ATGTAGAAAA TCCAGAATGG CTCTTTGTTC  
1021 CCACTGCGCA ATGTAAAATC ATGCTACCAG TATCTTTTCT TGTGGAAGGT GATGCAATAG  
1081 AGGTTTTTGT TGCTCAAGTC CGGAACCAAT ATGAGCCACG CCCGTTGTAC GGAACTCACT  
1141 ATCATTATGA GCCCGAAGAC CATTCTGAAG ATTTTGAGGC GTTCAGATCG ATTGTTTTTA  
1201 TGTGGATCAG AAAGTGGAAC CCAGTCGATG ATGATCAAAT GGTAGGTGA TAAGTTCATA  
1261 TTTCAAAGTA TGCTTTTCAT TGTTTCAGCG TAAAGTTGCC AATAAACTCA AGAAATTCTG  
1321 CAATGATTCG CCATTGCCAA AACTGTTCAA TCAGACGTAT AGCAATCAA ACGACACAGA  
1381 TGGAACATTA AATTCTCCAG AGTTTGTATA TTTGAATTTA GAGCATATTT TGTTTGTTAA  
1441 ACTGTATTTA TTTAAAAGTT CTAAAATTGA TAAGTGGTAA ATAAAATAAT CAGAGGGTAA  
1501 AAAATGTTAA GAAACGAGTG GTTTTTAAGC TACTCTTAAA ACAAACGGT TAAGCTTACA  
1561 TTTTACAGC CAAATTGATC GCAACTTCTC AATACAACCTG GAAATGCTGC GAAACAAGCT  
1621 GTTCGTCGAT CATGTGATAA GATTTGACAT TCTCGGGCAC AATCCATTTA ATACTGTGAC  
1681 TGTTTTAATTT TTCTCATCGA AATTTCTAAG TGGCTCCACG ATGAGCGAGA AGAAGACACT  
1741 AATTGTACAC CATCACTTTT CTATCTTTCT TTTTTACACT TAAACACTTG ATTCTTTCTT  
1801 AAAAATTATA TGTTTTTCTC ACTTCTTAAT ATCAAAATTT CATGATTGGT CGGCAATCGA  
1861 CAGCTTTCTT TAAAAAAAAG AAATTAGCAA TCTTTCAGTT TTTTTTTTTA AAGAAACCCC  
1921 TTTAAAACAT TTACTCTACA TAAATTGTTA GCAACCCCTT CCCTGACAAT TGGCGATCCC  
1981 GTCCAAAAGT TCAAGGTTCC TGTTTTTATT TTTTTTTTTA AGAATATATT CATTACCAGA  
2041 TTTTACTATA TAACTTGCAG ATTGATTTAT AAAATAGAAT TATTAAACAA CTTCAATCTT  
2101 TGAGAGAATT CAGTAATACG CAAATGTTTG GTTTGATTTT TTTATTACAA ATACATTGTG  
2161 GAACTGAACT AGTTCATTGG TTTCAA

//

LOCUS 39 3092 bp DNA linear PLN 25-FEB-2004

ACCESSION 39  
 VERSION GeneMark.hmm v3.0 self\_training  
 ORGANISM C.elegans  
 FEATURES CHR ---  
 CDS complement(join(500..715,1063..1540,1817..1917,2479..2592))  
 /translation="MLVVIFCFLNILFSVTSFDLEDDDDSWKELTFSIRTDGNGTIE  
 SAHIQWTDRFDDSFAYAYTNENRTDLKFLYDKPRPELFFVSKNFIVDAFTQFMDFQ  
 RTKISRISVTLPSLTDDLKKITKRKNSVKTTPAIDNFRFNSYDSLLYNELLRLSTGI  
 PKQLKISFFYYPERTEKVLDTILNHPKVREITELDLRTVESDINDAQLHQLECESI  
 SLRSSTVTNAGINRILKEWQDGLRPTRYLKLVNDDLQKAEIMDGVSKRTLQRGVWEI  
 KNRFNASATVTVSRVPTNLYSKPTFEFAVS"

ORIGIN

|      |            |             |             |             |            |             |
|------|------------|-------------|-------------|-------------|------------|-------------|
| 1    | TCATTGAAAA | ACTCCTTCTC  | ACTCATTTC   | CGCGCATTTC  | CCGCCTTCTA | TTTTCCCGTA  |
| 61   | AGACTGCCGA | AGAGAGACCC  | CCGCGTTTC   | CACCGTCAA   | TGACAGCCTC | AAATGACCAT  |
| 121  | CATCACAGCC | GAGTAATGAG  | TTCTCTTCTC  | GTGTGTTTCG  | TCTTTACCAA | TCGATCACAT  |
| 181  | TTGACCATAT | GTATGTGTGC  | AACTACGATA  | GTTTAGGTGA  | AGGTGCCACC | GGTATTTCGA  |
| 241  | ATGAGACATG | TCTTTTTTTA  | AGTAAAATGT  | TCTGAAATAA  | TTTAATATGG | GGTTTAAGCA  |
| 301  | ACAAAGTTTC | AAAATTGAGA  | TTTTTGAGCT  | CCAACGGATG  | CTCAGAGCAA | AACAAGCGGC  |
| 361  | GTGCTATCGG | TGCTCTCGGA  | ACATGTGTTA  | TGACAGGCTA  | CTTATCAAGT | TTATTTTCATT |
| 421  | AGACAAGCTA | TATGCATTTA  | ATGGTTCAAT  | AGATAAATAA  | AAAAATATAA | CATTGATATT  |
| 481  | TATTTTTTAC | CATGATTTTT  | TAAGAAACCG  | CAAACCTCAA  | CGTCGGCTTT | GAATCATATA  |
| 541  | GATTAGTCGG | CACACGGCTT  | ACGGTTACAG  | TAGCCGAGGC  | GTTGAATCGA | TTCTTAATTT  |
| 601  | CCCAAACGCC | ACGTTGCAAT  | GTTTCGTTTCG | AGACTCCATC  | CATAATTTCA | GCCTTTTGTA  |
| 661  | AATCATCATT | CACTAGTTTC  | AAATAACGAG  | TCGGTCGTAA  | TCCATCTTGC | CATTCTTAA   |
| 721  | AATAGAAAAA | GTTTCGTATGA | TTGCATGTTT  | TAACAGGGGC  | AACGATCGCA | TGAAGATGTT  |
| 781  | ATCGTGATAC | TTTTTAAAAA  | GTCACAGAAA  | TTTTGATGAT  | TTATTGATAT | TACATCAAAA  |
| 841  | AGAATGACAC | AATTTGCAGA  | AATTCAGAAA  | TATCACAGTA  | CATTAGAGAA | ATTGGGAAAT  |
| 901  | AAAGAAAAAT | GGTAGCCTAC  | ATGATAACAT  | CTCTAATTAC  | ATTTTTTCAT | TCATATTCGC  |
| 961  | AAATGTTTCA | AAAGATTCAA  | TTCATGAAGT  | GGTGAAGAAA  | AATCATGTGA | TTGAAATCAA  |
| 1021 | AATACAACAT | TTTTATTTGA  | CAGAGTCTAG  | ATACATGTTT  | ACCTTTAAAA | TTTCGGTTAAT |
| 1081 | TCCTGCATTG | GTTACCGTGG  | AAGATCTCAG  | AGAAATAGAT  | TCACATTCCA | ATTGATGAAG  |
| 1141 | TTGAGCATCA | TTAATATCAC  | TTTCAACAGT  | ACGAAGATCC  | AGTTCAGTGA | TTTCTCGAAC  |
| 1201 | CTTGGGATGA | TTCAAAATTG  | TACCGTCCAG  | AACCTTCTCA  | GTCCGCTCAG | GATAGTAGAA  |
| 1261 | AAATGAAATT | TTCAACTGTT  | TCGGGATTCC  | GGTAGATAAC  | CTCAAAAGTT | CGTTGTACAA  |
| 1321 | CAATGAATCA | TACGAGTTGA  | AACGAAAATT  | ATCAATTGCT  | GGTTTTGTTT | TAACGGAATT  |
| 1381 | TTTTCGTTTT | GTGATCTTCT  | TGAGATCATC  | TGTCATGAT   | GGAAGCGTCA | CACTAATTCT  |
| 1441 | GGAAATTTTT | GTTTCGATTCT | GGAAAAATC   | CATGAATTGA  | GTGAATGCGT | CCACGATGAA  |
| 1501 | GTTTTTGCTG | ACGAATAGTT  | CAGGGCGTGG  | CTTGTCATAT  | CTGAAATTAT | ATTAATTTTC  |
| 1561 | CAACTTGAAA | TTTTGGCGAC  | CACTGCAGTA  | GCAGTTGGTG  | TTTTTGACTT | CATGCAAATA  |
| 1621 | TCATGCCATT | AGAAAATATC  | TAGAATTTCC  | ACAATTTACC  | AACAACGCCT | AGAATTATAA  |
| 1681 | TTTTTGACTC | ATACTTCTCA  | CAATCAGAAC  | AATTTTCTTT  | TCGAGTCTAG | GAAAATTGTA  |
| 1741 | GGTGTTTGGA | TAATACAATC  | TCTGCTCATT  | TATGACTAAC  | ACGTCGTTGC | TCAAATTCTT  |
| 1801 | ACAAAAACAT | TCTTACAAAA  | ACTTCAAATC  | TGTCCGATTT  | TCGTTTCGTT | AGGCATAGGC  |
| 1861 | AAATGAGTCA | TCAAAACGAT  | CAGTCCATTG  | GATATGAGCA  | CTTTCGATAG | TACCATTCTG  |
| 1921 | AATAATATAA | CAAGTAAGAA  | TAAACACTTA  | TTTATTTAAAT | ACAAATATTT | TAAGAAATCT  |
| 1981 | TGCTGATTAG | CGATTCCGTT  | TGTAGTATGT  | TTAAGAATTC  | AACAGATCAA | AAACAAAATT  |
| 2041 | AGCGCGAAGT | GTTAGGAAAG  | TAGCCTCGCA  | AATAAATATG  | TAGATTGTCA | TCTACGTTTG  |
| 2101 | ATGGAAAAAC | GTGAAAATGG  | CACGAAACGAT | TGTAAGATTA  | TTAAACCGCT | TTTTGAGGAT  |
| 2161 | GAAATCAACT | TTCTGAAAAC  | AGAAGGTTTT  | TGGTCGAATA  | CTAAAATAAC | TTCATGAGCC  |
| 2221 | TAAATGTGCA | CCTACTGCCG  | AAACCCAAGT  | TAGGCAAAAA  | CTCTTTTGGC | AAAAACTGGG  |
| 2281 | TAAGAAGCTG | GAAAGATCTA  | AACTATGCTT  | ATTAGTTGTG  | TCGGAATTCA | GAATAGGTTT  |
| 2341 | ACGCATAAAT | TTAATAAAAA  | GGTTGTAGGT  | AAGCACGCCG  | TCAACACCGG | AAAGAAAAAC  |
| 2401 | TAGTTCCGAT | TTTTTTTCATT | TAGTGTGAGC  | ATAAAAGTTC  | TAAGGATCTA | GGTGAAGGAA  |
| 2461 | ATGGTTTTTC | ACACTTACAC  | CATCTGTTCT  | TATTGAGAAA  | GTCAGTTCTT | TCCATGAATC  |
| 2521 | ATCGTCGTCC | TCAAGATCAA  | AAGATGTCAC  | CGAAAATAGA  | ATATTCAAGA | AACAAAATAT  |
| 2581 | GACCACCAAC | ATTTTCCTTT  | CTTTGTTGCA  | AATGTTTCGTT | TCCTTTTATT | CCTGTTTTTT  |
| 2641 | TGAAGCATGC | TCATGACCTC  | TAGAGCACTA  | GAAATGAAAT  | ATGATATTCT | ACTTTAAAAAT |

```

2701 TTTTATTTTT AAATTTTCAG ATATCAATTT GGGACTTTTG AAACAAATGA AGGATACTTG
2761 AGAAGTGGCA TGTACATATG ATTTGAAAAA AGGGAAATGT TTTAGAAGAT TTTGATGTAC
2821 TCTATTAAAT TCTTCCTTTC TAGGTACCTG ACAAACCTGGC GTCGCCAGTT TTGTAGGCAC
2881 GAAGGTTGAC ATTTTCTTAC CTCCATGGAA AACTTAGTTT ATATTTTCCC ATTCAAAAAGA
2941 AAATAATAGA ATATATCAAA ATCCATTACC AATACGATGC GAATATAGGA AACAATTGGA
3001 AGTAGAAATG GAAAAAATAG GAAATGTTGA ATGGGATCAC AATGTAATGA AATCACAAAA
3061 ACATAGTAAA AATGGAAGAA AATTGATTAT CT

```

//

```

LOCUS          40      2236 bp      DNA      linear PLN 25-FEB-2004
ACCESSION     40
VERSION       GeneMark.hmm v3.0 self_training
ORGANISM      C.elegans
FEATURES
  CDS          CHR ---
              join(500..802,878..1072,1260..1490,1539..1736)
              /translation="MLETALESVSTCCQLTGLGVFYTYILSFVLAFDLSLTAALYIA
              SLGAVLVFLSANYQFDNKKFEPKTFIVYGLFAQSFCASLATCFFAESGDESKSDKS
              LMTQIIPKISIIILFFLAFYLTHASSMFYIKILCRSGNCTDSASTLSWVVTIILIGFK
              VVDYEDFSKSLSTITMIAFGFLYLSLAFVINDRLPPAKSLFEQEIAQSFQSVKNIL
              KYEDHRTSETDGILTFYIKNLTSDKIAIDISFSNPGDQLDGHFSRKYIRGKGHVKLN
              VKRGTIMEKGRDMFIFYARSIKDLESINDSGFLTIYF"

```

ORIGIN

```

  1 CAATTCTCGC GTTCGGAATT CTCTTCCTAA ATCTGAACAT TTGTGCCATA ATAATTTTCT
  61 GATCGGGTTC CGAAATACTG TGTTTATCAA TAACTTGGAA TCGAGTACTA CTGCTTGTAG
 121 AACGGCGGCC ACCTGATTCA AGATCCTAAA AATAAAATTT TCCATCAGTT TTCAAAAGGT
 181 TTCTCTCACT TTATTCACAG CCATCGACAT TTTTCTGAAT GTGTTCAGCA GTTTTCCACG
 241 TGGCAGTCA AATTAATTGC TTTTTTTTAA AGAGGAGGCT TTAAATGAAC AAACCATCTT
 301 TCTTCTGACT CCCCTGGTCG GCTAGTTTTG GAGTGGCACT GAAATTGTAT CAAATTGAGG
 361 TTTTTTGTAG TTTTCAGAAG CATGGATAAT CCTTTCGAAA AATTGAATAA TACTAAGAAA
 421 TCATATAAAT ACAATTTTAG TCTCATAAAG TCAGAATCTA GATATTTTAT TTATTTTATT
 481 TTTTCAATTC TCCATAAAAA TGCTAGAAAC TGCTTTGGAA AGTGTCTCAA CATGTTGTCA
 541 ATTAACTGGT CTTGGTGTAT TTTACTACTA TATTTTGTCA TTTGTATTGG CATTTGATCT
 601 TTCTTTGACC GCAGCTTTAT ATATTGCTTC ACTTGGTGCT GTTCTTGTTT TTCTTTCGGC
 661 GAATTATCAA TTTGATAATA AAAAATTCGA GCCTAAACT TTCATAGTTT ATGGATTATT
 721 TGCGCAGAGC TTTTGTTCAG CTTCTTTGGC TACATGCTTT TTTGCAGAA CAGGAGATGA
 781 ATCGAAAAGT GATAAATCAT TGGTAGGTGT AAATTGGAAG ACGAAATTTA AAATTGTCCT
 841 GTTGTGAAGT ACAGGAACCT TCACTAATTT TTTCCAGATG ACACAAATAA TTCCAAAAT
 901 CTCAATCATA TTATTCTTCC TTGCTTTTTA TTTAACTCAT GCTTCATCAA TGTTTTACAT
 961 CAAAATTCTG TGCCGTTCTG GAAACTGTAC TGATAGTGCT TCAACTCTCA GTTGGGTTGT
1021 TACAATTATT TTAATTGGTT TTAAGTTGT CGACTATGAA GATTTTTCAA AGGTTTGTGT
1081 TTTTTTTTGG AAAGTGAAGT GTGTGAAATG TTGCTTTGAA TCGATCAATA CTACACAAAG
1141 AAAATGCTGA AACATTTGGT TTTTAGAAAA TATATTTTAA AAGCAAATTT CCCTTTATTC
1201 CTTCTCTGGG TGGATTTTAA CTTTTCTGGA TTTTCTGGAT TAACTTTCTG GTTTTGTAGA
1261 GTCTTAGCAT CACAATGATT GCTTTTGGAT TCTTGTATTT AAGTCTAGCA TTTGTCATAA
1321 ACGATCGATT ACCTCCAGCG AAAAGCCTTT TTGAGCAAGA AATTGCACAA AGTTTGGAT
1381 TTCAATCAGT TAAAAATATT CTCAAATATG AAGACCATCG CACATCGGAA ACAGATGGAA
1441 TTTTAACTTT TTATATCAAG AATCTTACAA GCGATAAAAT AGCGATTGAT GTGAGTTTTT
1501 TTTAATGTAA AAAGAGTTTG ATATTACAAA TATTATAGAT AAGCTTCTCA AATCCAGGAG
1561 ATCAGTTAGA TGGACATTTT TCAAGGAAGT ATATTCTGGG AAAAGGTCAT GTGAAACTTA
1621 ATGTAAAGCG AGGAACTATA ATGGAAAAAG GAGATCGAAT GTTCATTTTT TATGCAAGAT
1681 CTATAAAAGA TTTGGAAAGT ATCAATGATT CGGGATTTCT AACTATTTAT TTTTGATTTA
1741 TTGGGTTTAT ATGATCTGAA TGTTGATATA AAAAATTTTA AAACCTCGAT TTAATAAATT
1801 GTCTCAATAA AAAAATTTCA AATGAGAATC TATATCTCAC CTATCAACAT ATTCTGCCAA
1861 ATCCTCATCA TCATTGATCG GGGCTCCATT TTTCTGATA GATGACGTCA CATCGAAACC
1921 AGAAGCCTCA TTTCTAAAGA TTATCACTCC AACTTGTTTA TCAAATGCAT TTGATAGCAT
1981 TCCATAATAT TCTGATATTG ATTCTTTACT CAGCTTCTCC CATCCAGTTT TGTATCCCAA

```

2041 CATTAAAATA TTCGGACGGA GACGGCCAAG CTGCGGTCTG AAAATTTTGG TTGTGTTGGT  
2101 TAATCTATTC ATATTTATAG CACGAGATAA TTCGCACCGT GACCTTTTTT GGAAAACCCA  
2161 CAATAAAACT ATCATTTTGG AAATTTTATA GTTAATCTAG CACTTGGCAC ATTCGAATAT  
2221 TTTACCTGCA ACAAAA

//

LOCUS 41 14183 bp DNA linear PLN 25-FEB-2004

ACCESSION 41

VERSION GeneMark.hmm v3.0 self\_training

ORGANISM C.elegans

FEATURES CHR ---

CDS

complement(join(500..691,1197..1328,1565..1720,2195..2521,3016..3094,4878..4964,  
13634..13683))

/translation="MKRRGPEIPPSFSRGGKLPITRIPHFVVIKQGWVILTRGSS  
IEEMSSDTKYKYAVVRIPETSVDVDFSLIVAKGYSDVSFVASLSQCNLRDDPNDDQP  
TTSSNSVKESINDDESNSENNKLSPRRQSNPHSSLPATSSSTVKNEPTDSWTPSAL  
SNDPTPDLLSATVPAELLTNLFAKTKSTEPKPQQLFGFQASGVDFDLNNEWHENLR  
LPNGNGTEKYHPYGGNSKNDSPLOTRMKGWQREYIKEVIKDSHYPTTEELRDIEQKC  
DLSRKQILRFIAKRLTNPNRKPRVNHHDKEKRKEQEERDSLADPDDDMINDNEAVTNL  
HHILNSLQETTA"

ORIGIN

1 TTATAGAAGA GCACAGCTTT TCCGTCTTTC TTTTGGCTTT TGAAGAGGGC ACAGAATAAT  
61 TTGTAAGAAA ATGGTGGTTT TGAACTAAAT ATTTATAATT TTTCGAAAAA TGCGTACTTT  
121 TTTGTGAACT TTCAGTTCAT GTTTTGTATT TCCAAATTCA TCACATTGAC GTTTGCCAGA  
181 GCTTTTACCA AAGAAAAACC ACATTAACTA AGTAAGCCTT ATCATGTTTC AAACATAGGT  
241 TTTAGTCTTA GACTTATAGA GTTAGATTCTG AGGATAAGCT CTGGTAGGAG TAATGCAAAA  
301 TTAATAATAT ACAAGAATTC AAAACACTCT TCTTCTGAAC AATTTCTGCC TGTCCCCCTT  
361 CACTTACCAT TTCAACACAA ATTTCAAACA ATCAATCGAA GAAACCAAAC ACTTTTTTCAT  
421 TTTTATATAT GCAAAGGCAT TATGCAAGTT TTAATAAAGA ATTAATAATCA AATTCAGTAG  
481 TTAATAACAA ATAGTTGTGT CAAGCCGTCG TCTCTTGCAG TGAATTCAA ATATGATGTA  
541 GATTGTTTAC TGCCTCATT TCATTGATCA TATCATCATC CGGATCGGCC AGCGAATCCC  
601 GTTCTTCTCG CTCTTTTCGC TTTTTCGTCAT GGTGATTTAC ACGTGGTTTT CGGTTTGGAT  
661 TGGTTAACCG TTTTGCATG AATCGAAGAA TCTGAAATAT ATTTGAATTT TTATAAAATT  
721 AAGAACTTCT TACTAGGGAA TATTGTAAAT TGGGCAATTA CTAGGAAGAC AAAATAAACT  
781 TTAAATGAAA GACCAGGCGT CTTCTAGCA ATTTCCCAAT TAACAATATT CCCTAGTTAG  
841 TTAAATCAAA AATCGTGAAA TATTAATAAC CAAATACCAT ATTTCTTCTA TTAATATTAC  
901 ACCCGAATGC TTCACTTTGA ATCACTTCGT CGTTAGCATT TCAATAAATA TTAAGTTACA  
961 AACTATAGAA AATGTTTTGT TAGTTGACAA GTTTTCAATA TAACAAACGA CAACTGAGAT  
1021 GTACGCTGTC AAGGTTTGAC AATGGAAGTG CAATACTTAT AGAAAAACG GTTGCGAAAA  
1081 TAAGGGAGAT CTAGGATCAT TTTTCATTGC TCCTCCTGGG GGAGTTTTTC TCCAAAAAAT  
1141 GAGCCTCAAT AATTGAGGCT AGACCGTTTT TTGGGTTACT GTACTGGGAT GCTCACCTGT  
1201 TTCCTACTCA AATCACATTT CTGTTCAATA TCTCGAAGTT CTTCTTCACT TGGATAATGA  
1261 CTATCTTTAA TCACTTCTTT AATATATTCC CTTTGCCATC CTTTCATTCT TGTTTGAAGT  
1321 GGTGAGTCTT GAAAATTGGA AAACCTTATG AACCTTGCAA ACATTAATAA AGAAATTGGA  
1381 AATCAATTCT TCAACCCCCT CGATCAAAAT AAATACTCTA ATATATAATT TCTGTATCAG  
1441 AAAAAGCTTC AAAGTTTTCA AGACTGATCT ATAAAAACAA TTATTAATAG AAATGGAAAT  
1501 TTTGCTAAAA ATACCGTACC CCCGGGGTGA ACTTGACACA AAAACTATTT AGCTTCAAAC  
1561 TTACATTCTT ACTATTCCCT CCGTACGGGT GATACTTTTC AGTCCCATT CCATTTGGTA  
1621 ATCTCAAATT CTCATGCCAT TCATTATTTG ATAAATCGAA ATCAACGCCT GATGCCTGGA  
1681 ATCCGAATAA TTGTTGAGGT TTTGGTTCGG TAGATTTCTG CTGTAAGAGA AAACAAAAAA  
1741 TGTGAGTAGC GACAAGGACA AAATCAAGGG TTTTGTAGAGA TCAAATCAAC ATTGATTAGG  
1801 TTTTGTGGAG TTATACATTT AATTAATGAT TACATGGGAT AAGGTTGGTA ACTAGCTTAT  
1861 CTTTGACCCT AGTTTCAGAG CTGGGAGCTT TAAAAGTACT CCAACATACT TTTTCTATA  
1921 GATGTTTTAA ATTTTCTATG AATTTTAATT TATCTGTAAC AACTTTGGGA TTTCCAACCA  
1981 GTAAATATCA TGAAACATAT TAAGAAGTTA GTGCGATTCC CTTATATTTT TAACACATTT

2041 TTTGATAATA TATGTCTATA TTGGAATGAA TTCATCAAAA TCGAGAACAG GAGACAAAAT  
2101 ATATACTGTA GTTAGTAGTG GTTTGTATTG TTAGATCAAA CATTGAACT CATACAAATT  
2161 GATAAAAGAA TAAAAAAGAT TAGACAGCAC TTACCTTAGC AAACAAGTTG GTGAGTAATT  
2221 CAGCAGGAAC TGTTGCTGAT AAAAGATCTG GAGTTGGATC ATTAGAAAGA GCCGATGGCG  
2281 TCCAAGAATC AGTTGGCTCA TTTTAAACAG TAGACGATGA GATGGCTGGA AGTGATGAGT  
2341 GAGGATTCGA TTGTCTTCGT GGTGGAGATA ATTTATTATT TTCTGAATTT GATTTCATCGT  
2401 CATTATTGTA TTCTTTTACA GAATTCGAAG AAGTCGTTGG TTGATCATCA TTTGGATCAT  
2461 CACGCAAGTT ACATTGTGAT AGTGATGCAA CAAATGATAC ATCTGAATAT CCTTTCGCAA  
2521 CCTGTAAACA TTTTGAATT TATAAAAAAA CTGTTTTTTG TTTAACTTCA GTTCTATCAG  
2581 ATAAGAGTTC ATACTAAACA ACTTTAGTAG GTAATCCATC ACGTTGATGC CAGTCAAGGG  
2641 CACCTCCTCA AGCATCCTCC TTGAGCCCTA CACAGTTCCA CTAGTTGTTT ACAGACGAAT  
2701 CGCCTTTTGC TATATATTTT TTTGTTATTT TCTAGTTTTA TCATAATGCA TGATACATCC  
2761 CAAATACAAG ATTTCTACGG AAATCTTCTT TGGTCTGACC AAATTTTTTT TTCTAACTTA  
2821 TTTGTATATC GAGTTGGGAC AATTTAATAC AATAACCCCA ACAATTTTGT TGAATAAATT  
2881 GAATTGAAAT TTTGATCAAG ATTCACAATA AGTGTGACAA CCTTCCTCAA CAGCTATCTA  
2941 TAATTCGCCT CCACTGAATC TTCTCCTCTT TAAACCTACA AGTCGTATAT CCGTAAAGTT  
3001 TTTTTCGAAA CTTACAATAA GGGAAAAGAA ATCAACAACC GAAGTCTCTG GTATCCTCAC  
3061 AACTGCATAT TTGTATTTTG TATCCGAAGA CATTCTGAAA AAAAGTTTAG ATGTTTGATT  
3121 CGGAATGAAT GAATGCAAAG AATAAATGCT TGAAGAGTTG AGAGAAACGA CGAAAAGGCT  
3181 CTTTGGGGTG ATAGGGAGCA GGTGAAGGTA GTAGATAAGC AAATAAGCGC AGTTTATTGG  
3241 TTTAATTTAG GAATTGAAAA AGGCAATGAT AATGATTAGT GTAGTTGATC AGTATTAGGG  
3301 GAATAAAAAA CACAAAACCT TATGAATTTG ATGACATTTT TTCAATAGTT GCGTCAATTG  
3361 CACAGAGCTT CTAACTAAAA TTAATGTTTT TTTGGAACT AGGTCTATGA ATAATGTTTA  
3421 ATTGAAAATC AGAGCAAGTT TAATTGTTGC AATTTTCCAT AAAACTTACA GAAATTTCAA  
3481 CCTACATACA AGAGGAAGAT GATTAATACA TCAAGAGAGT ACGGAATTAG GTATATCATT  
3541 GGACACTTGT TTCTGGAACA TTGAAAATTG ACGAATTCCT TTTTCTTTTA ACTACCAGAT  
3601 TTTAAAATTC AGATCGATCA AATGAAAAGT TTTAAAATGC AGTCTTTGTT TTAGGCGTGC  
3661 ATCGGATTTA TCAAACCTCA GCAATACCAC GAAGGTTGAG CAATGCCAAT ACACATGGAA  
3721 GATGCTCCAA TTGAGCATAA ATTTTACTG TAAGCAAAAA CAGGAATAAA ACGCCATTTT  
3781 CCCAAAGTTC TAGAGATTGT ACAAGAGCTT AATCAACAAT AGTTTAAATT ATTTACGGTG  
3841 CCATAATTGT TTGTTTTTGT TTTGTAGTTC AAAATTAGGG GTTTCAACTT TGTTTCTTAC  
3901 ATTTCAATTG TTCAATCTAT TCATTATCGA CATTTCCTTG CCAATTTGTG ACAAGGCATT  
3961 AAATAGAATT AGTTGATTAC TCTCTTATGA GACGCAGGTG GTTGGCAACA CTTACATCCA  
4021 ATTTTATTTT AATTTTACAG TTTCTTTTTT ATTTTCATTT CAAATTGGAT GATGTTTGTG  
4081 AAAATGTTCA TCGTCAAAAA TTA AAAATAT TTTAAGCTAC AGGACGGATT TCCCTCGATA  
4141 GGTCTTATTT TCAAAAAAAAA AAAATTAAC TTAGCGTCTGA AAAAAAAAAA AAAAAAAAAA  
4201 AAATTAACCT AGCGAACTGA AAAAAAATTA ACTGAGCAAT GATTTTAAAT CCAATATTGG  
4261 ATGATTCCTA ATACAAAATT AGATGTGAAA AAGAGTCACA ATATAAAAGA CAACAGTTGG  
4321 TTGAATGAAA GGATAGAGAA AGAAAGAAGG GACACAGGCA AAGAATACTA ATTTTGAATG  
4381 AAAAGAGAAT AGAGAGCGGC TGGTGGTGGG AAGGCTCCAA AAGTGTTCTGA TTTGATGACG  
4441 ACAAGTGTGT CTTCAAACAG TACGCACACA TAAAGAAATG GACGAAAAAA GGAAGAAAAG  
4501 ATGAAGAAGA AGAAGAATGA CACTTTTTAT GATTGGTACT TGCTATGGGA ATATGGAATT  
4561 TATTCTCTAT CAATCAAACA AAAATTATTG ACTTTAGAGA GACAAGTATT CACAAAAGAA  
4621 AATGAGCAGA TATAATACGG TAGTAGTGAT TTAACA AAAA AGTCGGTAAA AATCTACAAG  
4681 TTTACGCTTT ATATATATAC CAGAACATTT AAATGCGCTT CAGAAAATGA AGAATGCTCA  
4741 ATGATTATTA GATTGAAGTA CTTTTCAATG AGAACTAAGG TGAAGGTATC AATTTGATT  
4801 CAGCAGAATA TGAAAGAGCA GTCTTTAAAA AATAATCAAG ATGCGATTCT TAAATTTTTT  
4861 TAGCAATTTT ATGTTACTCC TCAATTTGAG AACCTCGGGT AGTCAGAATG ACCCAACCCT  
4921 GTTTGATCAC TGGAAGTGT GGAATACGTG TTATTGGTAA TTTGCTGGAT TTTTAGATGT  
4981 TCTACTAGAA ATGCACGGAA AAATGCTTCT GAATAAAATA GTACCATGCA GACGACTCGT  
5041 TGCGAGCAAG AACCTTTTTG GTGCGTGGCT GTTCAAATTT TGGCACAAAA CCACGCGTTA  
5101 TTGTTTCAAT GCGAACAGGA ACAGATAGGG GGACGGAGCG ATGCAAATGT GAATAACGTT  
5161 CACAATACCC CCCGCAAGTA CAAAAAAGA GAGAACGAAA GGAGAAAGAG AGAAAACATC  
5221 CTAAACATCG TTCCGTGTTA TAGAGATGTT ACTTTATGTG CCATAAATGT GCGCACTGTA  
5281 TTCTTTGAAA CTCTACAGAA TTTTGGGACA AAATGGGGTT TTGAGAAGC ATACCGATTT  
5341 GCGAGGTGTA CGCAGCCATC ACAACTCAAA ATTGTTTAGG TTAGTAGAGA AACAAAATT  
5401 GTTTATGTAT TGTGTGACAG GTGTAGAATA TTTGAAAACG TTCACTATTC TAGAACCATT

5461 AGACCCTCAC TTTATTGATT TTTGTTGAAA AATGCAAATG GTGTAGGGAA ATTGGGAAGT  
5521 TGTTAGAAAA ATTAAC TCAA AGTTGCTCCA GATTCTTTAA TTCTTCAAAT TTGAGATTGC  
5581 AATTTTCGAC AACACTTGCT GAAATGTTGG GTAAAAC TTC AAGAAAATTG ATAATGAATT  
5641 GATGAAAAAA GAGCCAACAA TTGCAACTTT TGGAAAATTT GGAAAATGA TTGTAAAATG  
5701 AGCAAACGCA CGGTTAAAAT CTCAAAATTA AGGAGGCAAT TTTCTAATA ACAGGAAAAG  
5761 CAAGATCGAT TTCGTGAAGT TTTCAAAATG CAATACTAAC AGAAGAAAA CGGTAATCAA  
5821 ATTTTCGATCC TAATATTCTT CTACGGAAC TATGTTTTCA CGTACAGTTT GGTACAGTAC  
5881 AGTCTGGAAA TTCATAATGT TGAAAGTAAT GATATCTGAT GATCAGTCGT GCTCTCTCTC  
5941 TGGATCTATC TCGCGGAATT CTACATTCAA AATAAGGATT TTCAAAAATC CTATAGCAAG  
6001 GAAAAACTGA TTTTATGACT AGATGACATG AAAC TACTA GGGAAATGGTG TTACCCCTGC  
6061 AATCGTATAG AGGACAAAAC AAAGTGAAAA TGGAAAGTCA GATCTATGGC TACAAGAATC  
6121 AGTTTTTGGG ATCTGCTTAA CTCGGTCCCA AAGCTGAAAT TTTTGGCCTT AAAAATTAGT  
6181 GCTTTTTTTG CTCAAAATGC CGTTTTTCGT GTGTAGAAGT GGCTACATA AAATTTGGCA  
6241 CTGCCGCCGC CGTTCGGATG GCCGATTGGT GAACTCTCGT GCTCATTAA CTAAAGGTCA  
6301 CGGGTTCGTT CCCCCTAGG TATTAATTTT TTTTTTGAAT TTTTCTCTA GCATGAAATA  
6361 TGCACAAAAA CACGGTTTCT TCCGTTTTTG GGTAAC TCG GAATAAATTT TTTGGTTCTT  
6421 GGGAATCATA AAAGTAATTT GGAAACTTTT TGGAAGTTTT CTTTTTTTGA TAAATTTTCA  
6481 CTTTTCTATG CACATTTTTT TCTTCAAAAA TAATTTTTTCA AAGTTTTTTC AAAAAGTGTT  
6541 TGGTTTGAAA GAGCAGCATT AGTTTGGATA TTTCTACGAT TTTGGAGGAT CAAATGTCAT  
6601 TTTTAGGAGA AAACCACTGT TGTTTTATCT AGAGTTTTTC ACGAAAAGGA CCTACTTTCA  
6661 AAGACTTCCA GCTCCGTTGA AGAGTAAAT AAAAAAAGT TGTCAACTGC AAAGTTATTT  
6721 TAAAAGTACC AATAAACAAA TTGTCAGTTG AAGTTACTCT GCTAAATTTT ATGGGTAGAG  
6781 AGATATGGAC ATTAGTAATT AAGTAAGTTA AAGCTTCACT TCGATTAGCT ATTTCCGTCT  
6841 ACCCATAAAA TTTAGCAGAA TAAC T TCAAC TGACAATTTG TTTATTGGTA CTTTTAAAAT  
6901 AACTTTGCAG TTGACAAC TTTTTTTATTT TACTCGTCAA CGGAGCTGGA AGTCTTTGAA  
6961 AGTAGGTCCT TTTTCGTGAAA AACTCTAGAT AAAACAACAG TGGTTTTTCTC CTAAAAATGA  
7021 CATTGATCC TCCAAAATCG TAGAAATATC CAACTAATG CTGCTCTTTC AAACCAAACA  
7081 CTTTTTGAAA AAATTTTGAA AAATTATTTT TGAAGAAAAA AATGTGCATA CATCAGGTGG  
7141 GAGAAAAGGG TGGGACAGGT GGGAGAAAAG TGAAAATTTA TCAAAAAAAG AAAACTTCCA  
7201 AAAAGTTTCC AAATTACTTT TATGATTTCC AGGAACCAA AAATTTATTC CGAAGTTACC  
7261 CAAAAACGGA AGAAACCGTG TTTTTGTGCA TATTTTCATGC TAGAGGAAAA ATTCAAAAA  
7321 AAAATTAATA CCTAGTGGGG AACGAACCCG TGACCTTTAG ATTAATGAGC ACGAGAGTTC  
7381 ACCAATCGGC CATTGCAACG GCGGCTGCAG TGCCAAACTT TTATGTAGCC ACTTCTACAC  
7441 ACGAAAAACG GCATTTTGAG CAAAAAAGC ACTAATTTTT AAGGCCAAAA ATTTAGCTT  
7501 TGGGACCGAG TTAAGCAGAT TCCAAAAACT GATTCTTGTA GCCATAGATC TGATCTTCCA  
7561 TTTTCACTTT GTTTTGTCTT CCTAGCGATT GCAGGGGTAA CACCATTCCC TAGTTAGCAT  
7621 AAAAGTTTTG TGTGAGTTAT CGGATTAAGA ATTCGATTGC TCACAAGATT TATTAGTTTA  
7681 TACTGGTAAG GAAAGATTCT AATTGAATTC TTGGTAGAAA AAGAGTAAAA TGGAAATGAT  
7741 TGATAAGGCA GATTTGCACT TTTTGTTTAA TTTTAGGGTT TGACGTTTTT AGAAAAC TTTG  
7801 AGAAATGTGA TTCGGTGTAG GACAGTAGGA GAAGGAAAAG TTGGGCTTAA AAAAACGTTT  
7861 AGTTGTAAC TTTGGCTGTAA TTTTTTTGTA TTTCTTTTCC CCTGACAGTA AGAGTTATCT  
7921 AGAGGAGATT AGCCCTAAGA ATGAGCGACA TGATTACGGT AGCGAGAAAAG TCGCACAAA  
7981 AGAAAATGTC AGACATTTT ATGAACTGGA AGTTGAAAAG TGGTGATGTT TGGGAGTGAG  
8041 AGATAGAGAG AGACCTCTTA CTACCCTTTT TCCACTTGCC TATACTAA AACGTTAGAG  
8101 TAGTTGGCCA TAACACTCTC AACGAGTATT TATTCGAACA AGAAGAGGTG GTAGTTGGAC  
8161 GTCGTTGCAG AAGTAGAAGA AGTAGAAGAG AAAAGAGAAA GAAGGTCTCT AAGTCTCTCT  
8221 ATCTTTTTCC C TATTCCAC TTGTATGCCC ATTTGCTGGTA ACGACTGCAG TTTAGAGGGC  
8281 TTTAAAACGT TTGGACACA CACTTTGACC ACCATCCAAC ACTATTTAAG TGAAGAGAGT  
8341 TAAATGGAGA AAAGGAATGA GGGAAAACGA TTATTTGAAG ATTTGATGGA AATGTTGGAA  
8401 AAGAAAATTA CATTAAAGGAT ATCACACTAA TTCTGAATCT AGTCAGTTAA TGTGCCAATA  
8461 TCAATTTTAA AACTGTTT TAG GTGTTTCA TTTCTCAAAGAA AAAAAATTAG ATAGTTTCA  
8521 GTTTATAAAC CGTGTTCAC CAGACACTTA TCTAAAAGGG TTTTATATTA CGGTATTCAA  
8581 TTATGGGGAT AGTCGATTAT AGATAATAAA TTCTTCTCG AGGCGTGACG GCGGAAGCTT  
8641 TTCCCGCCTC TCTTCGTACC CTAATGTAAG CCATGTGAAC TCCGGTAGAA CGTTTTAGAC  
8701 AACTTTTTTAA ATTTATAAAA AGTTATTATC GCTTGATTGC AGAACATTTT TCATGAAAAT  
8761 ATATCTTCAG ATCGAGCTCT GGCTATAGAG TATGGAGAAT GTGTGGGTCT TATGTTTCCA  
8821 GTTAAATGAA ATCCTTAAAA GTTTGAACTA GTAAAACACG CAACCCAGAA ACATGAACAT

8881 GAAGGAAAGA GCATAAATAA AAGTAAAAAG AGTTGAGAGA AGGAGTGGAA AAGGTTTTTG  
8941 GACGCACACA TAGACATATA AACTTTTTGAA AATTGGGTAG AAGTGGAAATC GTTTCGAAAA  
9001 TTCTTGGAAG TGATACGGAT TCTGCAGACT TGTGAGGTTT AACTTAAATC TAGTTTTATA  
9061 CCAATTTTCAG TTTTCTGGAC CATTATACAA ATTGTTTCGA AATGTTTTAAA GTCAGAAAAA  
9121 ATTCTGAAAT GACATGTCCG TAAATAGAGT AACAAGTAAC GACTAACACT AGTTGAACAG  
9181 TAAGAGACTA CAGGTGTACA GGTAGACAGA AGGGTGATCG GGATTACGAA CAAGGATTAA  
9241 GGCGGGTGGG AGAGGATAGA AGAACGAAAA AGAAGAGAAG AAGAGGGTAA TAGTAGTACA  
9301 GTAAGGGATT GAAGAGAGAG GGAGAAGGCC ATTATGAACA CAGAGAGAGG CCTTATGACC  
9361 AATAGATAGG GCAATGAAGA GAATGGGGTT GCTAGGGAAT AGAAAAATGA AACAAGGAGA  
9421 GTATGTTTAC AGCTGTGTTA TGGATATAAA TTGAGTTTAA AGTTGAATAG GGAAAAATCT  
9481 GAAGAAAAATG GATAATGAAT GAGCAAAGGA CATTTCTAGA AATTGCTTGG TTTTTAATTC  
9541 ACACAACATA TTTGTGACAT TTTTTAAGT TGGATAATAG CTTTTTCGAT TATTATTAAT  
9601 TAATGCTATG TTTATACTTT AACAAAACGA GATTTTTAAC TTGAAGTAGA CTAGGTTAAA  
9661 ATATGAGCGG CAAAAAGATC CTAAAAATTA GGCTTGGTAT GGAAATTTCC AAAATTTTAT  
9721 GACTTGTGTA GTAAATAATT AACAAATTAGA AACTATGGGA AGACTTTTTTA AAAAATAAAA  
9781 TGGAAATAAA TGTTCAAAAA CACAATGTCT TATTGACTTT TCCACATTCC CACATTTTCA  
9841 CAACTTAATA GGTACTTGGC ACATATAATA TTCAATCAGT TATAAACTA AGGGATTTTT  
9901 AATATATTCC AATTCCAACC TATGAAATTG GTCTTTAACT TTATGAAATA TAGGTTTGAA  
9961 AACTCAACTG TAACTTCTCC CTTTCAAAC TTTGGAACCG CCCGCTTAAA CGAGTTGGAT  
10021 AATCCGATA AGATATTTAT ATGTATATTT AAAATGTCAT TTCATTTTTA GACATCTATT  
10081 TCGCCATCTC CGTCATTTTG TGGTTTTCTG GTTGCAATTG ATATTGCAA GTTAAAAATT  
10141 GTTACTCATA TACATAGGTA GACAACAGAG CCTCTTTATT TCAGAGATAA GTACTAGATA  
10201 AGTGAAGTAA TCTAATAAGT GCATACTACT TGGTCACGTA TATTTGGGAA ACCATTGAGA  
10261 AATTTGCATT CCTTATTCTA TTCTGACCTA GTTTTCTCCA AACTCCCCTT ACTTTTTCTCT  
10321 TATTCTCTTA TAATTTCCAC CAGTTTCTCA CATTTATATA GACAACCCTT AATCGAATAA  
10381 ACTTCACAAG TAGGAAATTT GAAGAAAATA AAGAAGAGCA TTATCTTGAG TTGAGTAATA  
10441 TTTTGGGGTA GTTTTTGAAG TCCGGGCTTT TTGGTGTAAG AACGTGGAAC TCCAAAGAGC  
10501 ATTTTGGAA ATAGATTTTT GTCACAAAAA GATTTGGGTA GCTTGAATAT CAGTGGATTCT  
10561 TAAAACCAAC ACTGCCACTA ATAAATAAGA GATATATAAA TCGTAGAGTA GTGTGTATT  
10621 GAAAGAAGAA AAAAGAGTTT CTTGTGTGTG TGCTTCTCAC AAATTAAGG TGTGGGTGGT  
10681 GGGATCCCTT TGGCTCCTCG TGCTCCACCT TGTGCACTTT CAATATTGAC GAGAGATTCT  
10741 TCTGACAAGA GAATCCCCC TTCTCTATTG TGTTAAACTT TTTCTATTGG TCCCTCGTCT  
10801 TTCAATTTAC GAGCAGTTTA CGAGAATTCT CTTATCTATT TCTGATCAGC TGATTATTAT  
10861 CTCTTATCAG TTCATGATCA CTATTCCTTT AATCTTCATT TACTATGTAT TTTTTAAGTG  
10921 AAAGAATGAA TTGGATTTGA GTGAGGATTG AAAAATAAAT TCTATTATTT TCTAAAATTT  
10981 AATGGAAGT GAGATTACCA AAATACTAGT AAGAGCTTAG CTCATAGGTG AAAAGTTGTA  
11041 TTTTGGGAA AAAATATAAC ATTCAGATTT GAATCTCGGT ACTGGTATTT TCTACCGTAT  
11101 TCCCTTATCA GTCTTTTAGC CGTCTATTAT TTGATTGCTC ATATCTCATT TCATTTTGAA  
11161 TATTTTGCAA AATGTTTCAC TAACAAGCTG AAGAACTGAA TAACAAATGT TTTGTCAGTT  
11221 AACAACTTTT TTATACGCCT AAAGAAAATA AAGATATAAG CTGAGCAATG AATGTTGAGC  
11281 AATGAGGTGC AACTCTGAAC ATAAAAATAA AAATTGAAAT ATTTGCAGAA GGATTGTCAC  
11341 CGTAAGAAAA CTAAAAAGA CCTTCCCTCC TCCAACATTC TCCATTTATT TTCCTTATTC  
11401 AACCAGCTTT GCCTTCAATG TCCGTAAGCC ATCCTTAAGC GGCTTCCCTT AGGGGCGGAT  
11461 TTATGTTGTC GTTTAGGCGA AATTATTCTC TATGTCTATG CGTAGAGAAC AATTTAATGG  
11521 AAAATAAAG CGATGTACTA CGTCAAATAA GAGCACCTGG ACAGGCTTCT TCTAAGCTTT  
11581 TGGAATTTA ATAGTGAAGA AGGGTAAGGG CAAGAGACGA AAAAATAAAG CATTATGATA  
11641 ATGGATTTGT GGGGTCAAAG AGAATTTAGA TATTCGATTT TCGGGAAGAA AGGAATGAGG  
11701 AAATTGGGAA ATTGAAAATG AAATTTGAGA CAAAATTGAT AAATCTTTGA TGGATTTTAT  
11761 GAATTAATAA AGTTTTTAAA CTCTATTTCA AAGCTGCAGA GTAATGCAAA AGTTTCAAAA  
11821 CATTAGAAGT TTAAGACATA TTCACACTGT TTTCTGTTAT TTTTACATA CTAAAAATAA  
11881 ATAAACATAT AAAATAAGGG AAAGTCGGTA GAATATTCAA TAATCTTTAA GATAAAGTCA  
11941 GAAATTCAGA GAGAAAATTG TGGTTAGTGA TCATAAGCCA GAAGAAGAAA CTGGAGCTTG  
12001 AGATGTTTGG GAAAAAATG AAAGAGAAAG AGAAAGTAGT GGGACACTCC AATCAATTTT  
12061 ACACGCTTTA AGAATAGAGT TTAGGGTTGA ATGATTCGAA ATTTTAAAT GAAAAGATTT  
12121 CATACGAAAT TTATAAATTG GTATATGTAG CTGAATATTA GACTTGACAG TGCAAATCTT  
12181 AAAAAAGCAA TTGAAACAAG TTGTTCCAAT GTTTTTGACT AAAATTGGTT GTCAAAAAAT  
12241 TTGTTTGATA AAAAACATTT GAGAAGTGGT CAAAAGTTGC ATGAAAAGTT GTCAATTGCC



```

12301  AAAAATACGT  ACAGCCAGGA  AAGATTTGGC  AATTTATGAA  ATCAACTTCA  AATTTTTTCAT
12361  TTAAATTTTG  GGCTAATGAG  TTGATAAAAT  TTTGCCCTGT  TTAAACGATA  CACTTCAAGG
12421  AAAATTGGAA  ATCATAACCAC  AACAAGTCAT  TTTCTAAATT  TTCATAAATT  TTTGTTACTA
12481  TGAAAAGAAC  AACGAACAAA  CATTTTCTAG  ATACATTTTA  ATTGTATTTA  GTTTTCCAAT
12541  GAATACATAC  ACAACACATA  TATAATTAGC  ATGAAAAAGC  AGAAAAGTGG  TGATCTTTCA
12601  AAGTTATAGT  TCGTACGAGT  ATTCATCATT  GAAAACCTAAG  ACATTGGCAT  TTAGAACGAA
12661  AACGTGTGAT  TTTACTTTATT  ATTCCAAGGT  TTCACTTTAG  AGAAAAAAGA  GAGAACAAAA
12721  CAAAAAATGT  CTTAGAGATA  GAAATATAGG  GAAATGAATA  TGTTAACCGA  ATATAATCTG
12781  AAAGTATCAA  ATAAATAAAA  AATAGAAGCA  TTTTTGTCAG  GAGCATTATG  AGAGCAACAT
12841  TCAAACAGTA  TGTTTATGAG  ATTTGAAAGT  GAAAAGATTA  TATAAAGAGA  GTCTCTAAAA
12901  AATCAATATA  AACATAGATA  ACAGATGGAG  GGCTGCCGTA  AGGAAAGTCT  GTGTCTTTTC
12961  CCTTAGCGTC  CTCCTTCTCT  TTTTCACTAA  GCCCTAGACA  CACTAAGGGA  AAGAGAGAGA
13021  GCATTAAGTG  GAGAGACACA  GGCATTACTT  GGGACACTAC  TCTAAACATG  TTATATTAGT
13081  CTTTAGAGAA  ACAGAGGAGA  AGAGTAGATG  GATATACAAT  GGGCCGACGG  GGAATTCTGA
13141  ACAAGCACAT  TAGTGTGATT  GTGGTGTGGT  TCGGAGAAGT  TTGTTTTAGA  GAGAAAAGAT
13201  ACGGGTAATA  AGAACATCTT  GGACAATCGA  AGTCTCGAGA  ACAAATTTCA  AGGAACGAAA
13261  ATTAGTTTTA  AAACCTGCAA  AGAACCATGT  TACAGTTTTA  AAGGCAAGAT  AGCTCAAAAA
13321  AGTAATGTCA  TTGAATTTCT  GCAAATCTAT  TTTTGACATC  TGTTAGGAAA  GTTGCTTGCC
13381  GTCCGTCGTT  GGAAAATTAA  ATTCTCATCT  GAAAATTATT  CAGATAATTC  TAACCCAAAA
13441  ATTAATGCAA  ACCAAGTTCC  TTGGGTTCTT  GGAGTTCAAA  AAATTGATCT  CCAAGTTTGA
13501  ACCTTCAAAC  AACTTTTTTC  TATAAACTAT  AAAGTCTAGT  AAATCTATCG  ATTTGTTAAT
13561  GGATTAATTT  CTTATTAGCA  TCCATTGGAA  TAAAATCGAT  AATTGGGTGC  GAGAGAGGGG
13621  ATAAAGGGGT  CACCGTCCAC  CACGCGAGAA  AGAGGGTGGG  ATTTCAGGTC  CTCTTCTTTT
13681  CATTCTGTTT  ATCAACGATC  TATTAATCGA  CCTAGCTCCC  TCCATAAATA  TTTCTTGTTT
13741  TGCTGATGAC  GTAAAGATCT  ATCACACTGA  CCCTATTACT  ATCCAAAATT  CCATAGATTT
13801  CATAGTTATG  TGGTCCAAGA  AAAATAAACT  TTCGCTTGCA  CCAACTAAAT  CGGCTTTACT
13861  AGCACTTGGC  ACTCGGAACA  AAAATCATT  TTATTTTGTG  GACGGTGTCC  CCATTCCCCC
13921  TTCATCCACT  GTTCGTGACT  TAGGTCTCAT  TACTGATTGC  AAACCTAAGT  TTGATCCCCA
13981  CATTGTCTAA  GTTAGCTGCC  TAGCCTTGCT  CAGAGCAAAA  CAAATTCTCA  AGGCATCTCT
14041  CTCCAATACT  CCTAAGTTTT  ATGCCCATCT  CTTAAGACT  TACGTGGCCC  CTAGTCTCAA
14101  TTAGTCTCC  GAAATCTATT  CCCCTCCACC  TAAATCTTTG  CTCTCAGCTA  AACTTGAACA
14161  ACCTCTAAGA  CACTTTACCA  AGC

```

//

LOCUS 42 2208 bp DNA linear PLN 25-FEB-2004

ACCESSION 42

VERSION GeneMark.hmm v3.0 self\_training

ORGANISM C.elegans

FEATURES CHR ---

CDS 500..1708

```

/translacion="MCELDILHDSLYQFCPELHLKRLNSLTLACHALLDCKTLTLTE
LGRNLPTKARTKHNKRIDRLGNRHLHKERLAVYRWHASFICSGNTMPIVLVDWSD
IREQKRLMVLRSVALHGRSVTLYEKAFPLSEQCSKKAHQFLADLASILP SNTTPL
IVSDAGFKVPWYKSVEKLGWYWLSRVRGKVQYADLGAENWKPI SNLHDMSSSHSKTL
GYKRLTKSNPISCQILLYKSRSKGRKNQRSTRTHCHHP SPKIYSASAKEPWILATNL
PVEIRTPKQLVNIYSKRMQIEETFRDLKSPAYGLGLRHSRTSSSERFDIMLLIALML
QLTCWLAGVHAQKQGWDKHFQANTVRNRNVLSTVRLGMEVLRHSGYTTITREDLLVAA
TLAQNLFTHGYALGKL"

```

ORIGIN

```

1  TTAAAAACAC  CATTGAAATC  CACTGTCTTA  CCATGCAATC  CACGCAAATC  TCAGCTTGCG
61  TGACCATAAA  GTTGTA AAAAC  AACTCATTCA  AACATTTTTG  CGCATTTTTA  AAGTGATTTT
121  ATTTTTTATC  GGGAACCTAG  AATCATTGTC  CGCACTTTTT  GGAAATTTTT  ATTTTTTTCA
181  TTTTGTCTCA  AAATTTCTTG  ATAAACTCAA  AGCAAAAAAT  TCAAATAATT  TCATTTTTCT
241  AAACAATTAT  GAAATTGCTA  TGTTGTTGTT  CAGAAATGTA  TGAAACGTAC  ATTACACAAG
301  TTTTAACTCT  CTATTGCGAA  GAAACCGTCG  AAATGATCTA  CATCTCACGA  ACTTTGTGCA
361  AAATATTTAA  CCAACTTTGA  AGTTGCATAA  CTCTGATGAA  TCCCCTAATG  ATTTTTATCA

```

```

421 AAATCATTAA GTTAAGGTAG ATACACATCT TGTCATATGA TCAAATGGTT TCGCCAAAAA
481 TCAATAATCA GACAACAAAA TGTGCGAACT CGATATTTTA CACGACTCTC TTTACCAATT
541 CTGCCCCGAA TTACTACTTAA AACGACTCAA CAGCTTAACG TTGGCTTGCC ACGCCTTACT
601 TGACTGTAAA ACTCTCACTC TTACCGAACT TGGCCGTAAC CTGCCAACCA AAGCGAGAAC
661 AAAACATAAC ATCAAACGAA TCGACCGATT GTTAGGTAAT CGTCACCTCC ACAAAGAGCG
721 ACTCGCTGTA TACCGTTGGC ATGCTAGCTT TATCTGTTTCG GGCAATACGA TGCCCATTGT
781 ACTTGTTGAC TGGTCTGATA TCCGTGAGCA AAAACGGCTT ATGGTATTGC GAGCTTCAGT
841 CGCACTACAC GGTCTGTTCTG TTA CTCTTTA TGAGAAAGCG TTCCCCTTT CAGAGCAATG
901 TTCAAAGAAA GCTCATGACC AATTTCTAGC CGACCTTGCG AGCATTCTAC CGAGTAACAC
961 CACACCGCTC ATTGTCAGTG ATGCTGGCTT TAAAGTGCCA TGGTATAAAT CCGTTGAGAA
1021 GCTGGGTTGG TACTGGTTAA GTCGAGTAA AGGAAAAGTA CAATATGCAG ACCTAGGAGC
1081 GGAAAATTGG AAACCTATCA GCAACTTACA TGATATGTCA TCTAGTCACT CAAAGACTTT
1141 AGGCTATAAG AGGCTGACTA AAAGCAATCC AATCTCATGC CAAATTCTAT TGTATAAATC
1201 TCGCTCTAAA GGCCGAAAAA ATCAGCGCTC GACACGGACT CATTGTCACC ACCCGTCACC
1261 TAAAATCTAC TCAGCGTCGG CAAAGGAGCC ATGGATTCTA GCAACTAACT TACCTGTTGA
1321 AATTGGAACA CCCAAACAAC TTGTTAATAT CTATTGGAAG CGAATGCAGA TTGAAGAAAC
1381 CTTCCGAGAC TTGAAAAGTC CTGCCTACGG ACTAGGCCTA CGCCATAGCC GAACGAGCAG
1441 CTCAGAGCGT TTTGATATCA TGCTGCTAAT CGCCCTGATG CTTCAACTAA CATGTTGGCT
1501 TCGGGGCGTT CATGCTCAGA AACAAGGTTG GGACAAGCAC TTCCAGGCTA ACACAGTCAG
1561 AAATCGAAAC GTACTCTCAA CAGTTCGCTT AGGCATGGAA GTTTTGCGGC ATTCTGGCTA
1621 CACAATAACA AGGGAAGACT TACTCGTGGC TGCAACCCTA CTAGCTCAA A TTTATTAC
1681 ACATGGTTAC GCTTTGGGGA AATTATGAGG GGATCTCTCA GTGCATTGCC TCCAATCCC
1741 ATAATTTATT ACGCCGATAA TAACCTGGTG TAACCTTAAA AATGTACTTA AATCGACGTG
1801 TAAAAGATTG TTGGGAATCA AATTGATATT TTAATGCGAT CTCAAGGATA GTTTTTTTTCG
1861 TCAACCTCAA CTCAACAGCC GCTTTCGTCA AACGACGAGC ACGAATATAG CTAGCCAGTG
1921 TGACCCCTGT TACTTTTTTTG AACAGCCGCT GAAAATACCA CTTGGTATAA CCCGCTTTAT
1981 TCGCCACATC ATCAAGCAGT AAAGACTGAT CTAAATTATG TTCAATCCAT AATAGAACAT
2041 CTTTGATAAC CGTTGTATGA AACTGCTTAT CATCATATCT TAATTGGATG TTATTAGCTT
2101 TATTTTGATA GCGAGAATGC TGTTCAATAT ACATAAAATA ACCTAAATGT TCTTAAGATT
2161 GTCACGACCA CATCATCATG ATACCATAAA CATACTGACG GTATGTTA

```

//

```

LOCUS      43      2208 bp      DNA      linear PLN 25-FEB-2004
ACCESSION  43
VERSION    GeneMark.hmm v3.0 self_training
ORGANISM   C.elegans
FEATURES   CHR ---
           CDS      complement (500..1708)
           /translation="MCELDILHDSLYQFCPELHLKRLNSLTLACHALLDCKTLTLTE
LGRNLPTKARTKHNKIDRLLGNRHLHKERLAVYRWHASFICSGNTMPIVLVDWSD
IREQKRLMVLRSVALHGRSVTLYEKAFPLSEQCSKKAHDQFLADLASILPSNTTPL
IVSDAGFKVPWYKSVEKLGWYWLSRVRGKVQYADLGAENWKPI SNLHDMSSSHSKTL
GYKRLTKSNPISQIILLYKSRSKGRKNQRSTRTHCHHPSPKIYSASAKEPWILATNL
PVEIRTPKQLVNIYSKRMQIEETFRDLKSPAYGLGLRHSRTSSSERFDIMLLIALML
QLTCWLAGVHAQKQGWDKHFQANTVNRNRNLSTVRLGMEVLRHSGYITITREDLLVAA
TL LAQNLFTHGYALGKL"

```

```

ORIGIN
1  GTAATGCAGG TAAAGCGATC CCACCACCAG CCAATAAAAT TAAAACAGGG AAAACTAACC
61 AACCTTCAGA TATAACGCT AAAAAGGCAA ATGCACTACT ATCTGCAATA AATCCGAGCA
121 GTACTGCCGT TTTTTCGCCC CATTTAGTGG CTATTCTTCC TGCCACAAAG GCTTGAATA
181 CTGAGTGTA AAGACCAAGA CCCGCTAATG AAAAGCCAAC CATCATGCTA TTCCATCCAA
241 AACGATTTTC GGTAATAGC ACCCACACCG TTGCGGGAAT TTGGCCTATC AATTGCGCTG
301 AAAAATAAAT AATCAACAAA ATGGGCATCG TTTTAAATAA AGTGATGTAT ACCGAATTCG
361 ATTGCGTCTC AACCCCTACT TCGGTATCTG TATTATCACG TGTATTTTTG GTTTCACGGA
421 ACCAAAACAT AACCACAAGG AAAGTGACAA TATTTAGCAA CGCAGCGATA AAAAAGGGAC
481 TATGCGCTGA GAGATCCCCT CATAATTTCC CCAAAGCGTA ACCATGTGTG AATAAATTTT

```

541 GAGCTAGTAG GGTTCAGCC ACGAGTAAGT CTTCCCTTGT TATTGTGTAG CCAGAATGCC  
601 GCAAACTTC CATGCCTAAG CGAACTGTTG AGAGTACGTT TCGATTTCTG ACTGTGTTAG  
661 CCTGGAAGTG CTTGTCCCAA CTTGTTTCT GAGCATGAAC GCCCGCAAGC CAACATGTTA  
721 GTTGAAGCAT CAGGGCGATT AGCAGCATGA TATCAAAACG CTCTGAGCTG CTCGTTCCGGC  
781 TATGGCGTAG GCCTAGTCCG TAGGCAGGAC TTTTCAAGTC TCGGAAGGTT TCTTCAATCT  
841 GCATTCGCTT CGAATAGATA TTAACAAGTT GTTTGGGTGT TCGAATTTCA ACAGGTAAGT  
901 TAGTTGCTAG AATCCATGGC TCCTTTGCCG ACGCTGAGTA GATTTTAGGT GACGGGTGGT  
961 GACAATGAGT CCGTGTGCGAG CGCTGATTTT TTCGGCCTTT AGAGCGAGAT TTATAACAATA  
1021 GAATTTGGCA TGAGATTGGA TTGCTTTTAG TCAGCCTCTT ATAGCCTAAA GTCTTTGAGT  
1081 GACTAGATGA CATATCATGT AAGTTGCTGA TAGGTTTCCA GTTTTCCGCT CCTAGGTCTG  
1141 CATATTGTAC TTTTCTCTT ACTCGACTTA ACCAGTACCA ACCCAGCTTC TCAACGGATT  
1201 TATACCATGG CACTTTAAAG CCAGCATCAC TGACAATGAG CGGTGTGGTG TTACTCGGTA  
1261 GAATGCTCGC AAGGTCGGCT AGAAATTGGT CATGAGCTTT CTTTGAACAT TGCTCTGAAA  
1321 GCGGGAACGC TTTCTCATAA AGAGTAACAG AACGACCGTG TAGTGCGACT GAAGCTCGCA  
1381 ATACCATAAG CCGTTTTTGC TCACGGATAT CAGACCAGTC AACAAGTACA ATGGGCATCG  
1441 TATTGCCCGA ACAGATAAAG CTAGCATGCC AACGGTATAC AGCGAGTCGC TCTTTGTGGA  
1501 GGTGACGATT ACCTAACAAT CGGTGCGATT GTTTGATGTT ATGTTTTGTT CTCGCTTTGG  
1561 TTGGCAGGTT ACGGCCAAGT TCGGTAAGAG TGAGAGTTTT ACAGTCAAGT AAGGCGTGGC  
1621 AAGCCAACGT TAAGCTGTTG AGTCGTTTTA AGTGTAATTC GGGGCAGAAT TGGTAAAGAG  
1681 AGTCGTGTAA AATATCGAGT TCGCACATTT TGTTGTCTGA TTATTGATT TTGGCGAAAC  
1741 CATTGATCA TATGACAAGA TGTGTATCTA CCTTAACTTA ATGATTTTGA TAAAAATCAT  
1801 TAGGGGATT CACAGTGCAT AACTTCGTTG AGATAAATTA TTTTGAAAAA TGATCAACTA  
1861 ATATAACTAA AACTTTGTTC ACTGTTATTC AACAAACATT TTGTTAGTTG ATCATTTTTT  
1921 AAAATAATTT ATCTCAACGA AGTTATGCAA CTTCAAAGTT GGTTAAATAT TTTGCACAAA  
1981 GTTCGTGAGA TGTAGATCAT TTCGACGGTT TCTTGAGAAT AGAGAGTTAA AACTTGTGTA  
2041 ATGTACGTTT CATAATTTT TGAACAACAA CATAGCAATT TCATAATTGT TTAGAAAAAT  
2101 GAAATTATTT GAATTTTTT CTTTGAGTTT ATCAAGAAAT TTTGAGCAAA AATGAAAAAA  
2161 ATAAAAATTT CCAAAAAGTG CGGACAATGA TTCTAGGTTT CCGAATAA

//

LOCUS 44 12591 bp DNA linear PLN 25-FEB-2004  
ACCESSION 44  
VERSION GeneMark.hmm v3.0 self\_training  
ORGANISM C.elegans  
FEATURES CHR ---  
CDS  
complement(join(161..330,2644..2705,2759..2928,4062..4587,5700..5825,7326..7553,  
10017..10277,11776..11957,12080..12091))

/translation="MWSTGSKLRQQVDLSTCTLFWLDESVFCADGCLFLSPSFPQQQ  
PPTLYLCFRPYTAFKWKIRILRSRTIYQDVPPMLQGTISVGEPNSQVSIILSIEIDK  
FRSELLKSDMFYSAQVSLNGVKIGVSNAPAGNKGPNEMPVVVIDSKFVIPCIPTC  
STNIQLSMNSHSSIGKRGRPCGVTVTICLNENNESICQSQADSTGFVFRQRNRCPV  
LPLDRYKPLLDMIRECPSSILSWPSQVLP SHLKQFMYTCISHLYALNPQFMSQVIRR  
IINDILVTSTAEDVFRKDSLATGIITQCLRHFKTFDEFLENAQFSQSLKQONLD  
SGGGAVELLVNFVDQRLTIPLATRLLTIAAECAGCRFGDEQHEQHLIKRTLSALLI  
LRVLNPIIFSTLNTGIGSQIAKLVQISANSAASQTPDSDLTPAASTIRRMFDRIIFL  
VNQQQPAESPEDSEIGEVTIEWISCLTYMIGHSLTIRSATSSQVHLPLPVLELIRL  
HLLIISLILEIKSYVVASSASHAIFNLKFKYKATVGEQRESGFQTQDIDPAKPVFWS  
RCTMFKMFFLWAKGTTNRLKFS"

ORIGIN

1 TTTTTGCCC ATTTTTCAGC CATCGTTTGA AATTACTGGA GATTGAAAAA TAGCAATTTT  
61 TAGAGTTTGG AGATCAATTT AGAGTCCTCG TCTTTTTTTT GGGCAAAAAA AATTCTTCTG  
121 AAAATGTTTC AAACCACTAT ATTCTTAAAA ATGGCAATTT TTATGAAAAA TTTAATCGAT  
181 TAGTAGTTCC TTTAGCCAC AGGAAGAACA TTTTAAACAT GGTGCATCGT GACCAAAATA  
241 CTGGCTTGGC GGGGTCAATG TCCTGAGTTT GGAATCCGCT CTCACGCTGC TCGCCACAG  
301 TTGCCTTGTA AAATTTCAAG TTGAAAATAG CTGAATTCCA TAAATTTAAG TTTTAAACA

361 GAAAACGTTT TCAAGCAAAA AACAAACGACA CTCCGATCTT CCGCGTGTG TTTAGCCTTA  
421 AGAGTTTACA GCGAATTCAA AAAAACAAAT TTTCACCTCA AAAAAAATT GTGTATTTTT  
481 TTTATTCCTC GAAAGTGTCT GTTCAAGTTT TTAAAAAATT ATAAATTTAA AATTTAAAGA  
541 ATTTTGTTTA TTTAGAATTG AAAAAATCGA AGAGCAAAAA AAAAGACATT CGAGAATAAA  
601 TATAAACAC AAGGTTTGAG TGGGTATTCT TTTTTTTAAT ACCGGTTTTG CAGGAGAATT  
661 GAATTGAACG GATGATAAAA CTAGGCACAC ACACACACAA AAAACACACA CAAAAATGCT  
721 CATTAAATGA CAATGAAAAA GAGCAAGAAT TGAATGAGAT TTTCGAAAAA AGAGAAATGG  
781 AACAGGGATG GATACTACTAC TACTATATAG AGATATAAAG ACTATATATT GTACATATAT  
841 AATGGAAAGA TTATTGGAGG GTGCAAATTT TTTGGCGGGA AAGCTGAGCA ATTTTCGAGT  
901 GTATTTTCGC AAAGAAATTC GATAAATTTT CTGGGTAAAA ATTTGAAAA TCCAGAAAA  
961 ATCAATTTTT TCAGTTTTTT TTTTTAACTC AATAATATTT TGAGAAGTTT CTTTTTTTAA  
1021 AGCGAGGTTT TCAACGCCTA TTTGAAAAAT CGAAGAATTT TTTTTGGAT TCGAAAAAAA  
1081 CATCACTTGG AATTTTCAAA TATAACGTTG AAGATCCTAG ATTTTTTAAA AAAAGAAATG  
1141 CCAAGAGTTA GAAACAATAA AAAAAACATA CAAATTTGAA TCAAAAAATA AATTGAAATT  
1201 TTCGAAAATT TTTTTGAAAA CTGAAAATTT TGATAATTTT CTGAAAATC AAATGTTTGA  
1261 AAGAAATACA AAAATATCGA TTTTTCGAGT TATTTTTTTG TTGTATTTTC AAAGCGAGGC  
1321 CTCGCTTTAA AAAAAATCGA TATTTTAGTA TTGCTCTCAA AATTTTTTTG ATTTTCCAGG  
1381 AAATTATCAA AATTTTTAGT TTTCAAAAAA ATTGTGCGAA TTTTCAATTT ATTTTTTGAA  
1441 TAGAATTTGT TTTTTTAAA ATTATTTCTA ACTCTTGGA TTTCTTTTT TAAAAATAGA  
1501 GGAAAATCGA TAATCCAAG TGATTTTTTG CAATCCAAA AAAATTCTTC GAAAAAATC  
1561 GATAATTTTC AGTATGCAGT GAAATTCTTG GAAAAATCGA TAATTTTCAG TATGCAGTGA  
1621 AATTCTTGA AAAATCGATA ATTTTCAGTA TGCAGTAAA TTCTTGGAAA AATCGATAAT  
1681 TTTAGTATG CAGTGAAATT CAATGAATTT TTGGCGAAAA ATATCGAATT TCGAGTGAAT  
1741 TTCCAGAATT ATAAGTGATT TTTAGAAATT CATAAATTTT CGGTAAATTT TTCGAAAAA  
1801 ATCAGAAATT TTTGAGAAAA TAATTC AATA ATGTTCAATG TTTTTAAACA TTTTCCGAA  
1861 AAAATTATTT TAATTTTCGT TATCCAGAAA ATATTTTTGA ATGCAAAAAA TTGTACCGAC  
1921 ACGACGGTTC CAGGATGCTT CATTGCGATT TGATCTACGT AGATCTACAA AAAATGCGGC  
1981 AGAGTTCCCA ACTGATTTCA CATGGTTAAG AACGTGCTGA CGTCACATTT TTTGAGCAAA  
2041 AAATTTCCGC ATTTTTTGTA GATCAAACCG TAATGGGACA CTTAGACC ACCGTACAG  
2101 AGCAGCAATT TTTTTTGCA AAATTTTTTT TCCGCGATTC CAGGAACCGT CCAGCTTGA  
2161 AATTTCTTGA AAATCTCGAA AAATGCTCAG TTTTCACGGG CGGGACGGGG CGGTCATCTT  
2221 TGAGATGACG TGGTGGTGGT AGATTATTTG ACAGAAAAAG GATAAATATA TATATATATG  
2281 TATATATAAA CTGGGGCGAA ATGAGGAACC CGATCAGATC AGGGGGGCTG GCGGGGTA  
2341 AAAAAGAAAG TAAAGCAGGG CATGTGTGAT GAGATGTCAA AGGTTGGAAA TGGGTGCAAG  
2401 AATTTTACAT GAAATTGGAA TTTCAAAATT TTGTGCCGCG CGCGAGTTTC GATTTTCTTG  
2461 AACTGCGGGG GCGTCAACGG AAATTTAGAA AAAAGTTATT AGGAAACGGG CGGAGGAGGA  
2521 GGGTAAAACG ATGCACATAT ATATGTAGAT TTCACGTGGT GGTGTCAGAG TGTCGGCTTG  
2581 ATCTACGTTG ATCTACAAAA AAATTTTTGG ACAAAAAATT GCCGCATTTT TTGTAGATCA  
2641 AACCGTGATG GCTCGCAGAG CTCGCCACCA CGTAAGATTT GATTTCTAAA ATAAGAGAAA  
2701 TAAGTCTAAA TTTTCGCCTA TTTAAAAAAA AAGTCTCTTT TTTCTCTGTG GGCTCTACAA  
2761 ATGATGAAGC CGAATGAGCT CAAGAACTGG TAACGGAAGA TGCACATCTT CTGATGAAGT  
2821 GGCCTGCGA ATAGTTAGCG AGTGTCCGAT CATATATGTA AGGCAGGATA TCCATTCGGT  
2881 ATGAACTTCT CCGATTTCCG AGTCTTCCGG TGATTACGCG GGTTGTTGCT GCAACAAAA  
2941 AAAATCAAAA ATCTATGTTT ATTAGAGCGT ACTTGCTTTT TTTTTATTAG AGCGCATCAG  
3001 TCAATTTTTT TAGTCCCAGA AATTTCCGAA AAATTCGGAA AATTCCATAT TATAGGAACA  
3061 CAAAATCTG AGAATGCGTA TTATGCAACA TTTTTGAAGC GCAAAATATC TCGAAGCGAA  
3121 AACTACAGTA ATTCCTTTAA TGACTACTGT GTCGATTTAC GGGACCTTGA TTAAACATA  
3181 TCTTTTAATC GAGCCCGTAA ATCGACACAA GCGCTACAGT AGTCATTTAA AGGGTTACTG  
3241 TAGTTTTCGC TACGAGATAT TTTCCGCGA GTTCTTGGTT TGTAACCAC CCCTACATTC  
3301 TGCTTTTTTA GCAAATTTTG TGGCGCAAAT ATCCAAAGGA GCACAATATC CGAGACGTAA  
3361 ATTCGTGGAA ATTTTTGAGC ATTTTTTCTA AGGGTCACCA CAACGACTGA GGAAAACGTT  
3421 TCGGGAGACG CGAAAATTCG GGAATTTGTG GGCGGGGCTT GGAAAATCGC GAGTACCAC  
3481 AAATTTCCGA GGATAACATT TTTGGAGACA AAAATTCCTG GAAATTTGTG AGGTTTTTCG  
3541 GTGATTTTTT AAAAAATGTA ATTTTTTTAG AGTCACCACA AACTCTGGGG AAACCAAAAA  
3601 TTTCCGACA TTTATGGGCG GGGCTTTGTT TTGCATACCC CGCCACTCA AAAAGCTCGA  
3661 ATTCTGTGTC CACGCGGAAA ATGGTTTTCC AAGATTTGTG ACCAGTTTCG AGTCTCGTTC  
3721 ATAAAATGAG TCACCACAAA TTTCCGAGA CGCGAAAGTT CGGAAATTTG TGGGCGGGG

3781 TTGGTTTCAC AGTTTTTCGAC ATTTTTTAAA GTTGTTTTTT TAATTTTTTCG GCATTTTTTCA  
3841 ACATTTTTCT TCATTTTTCA ACGTTTTTCG ACATTTTTGCG ATCGAAAAAA ATGTCGGAAA  
3901 ATGTCAAAAA ATGTCGAAAA AATGTCAAAA AAATGTCGAA AAATGCAAAG AATGCATACG  
3961 TTTTTAAAAA CTTTTTCTA CATCACATTT GCTGGGTAAT TTTTGGACTA TTTTTCGGCG  
4021 CTTTTTCAGG ATTTCCAAC TCCCGGAGGG TCTTTTCCTA CCTGATTAAC CAGAAAAATA  
4081 ATTCTATCAA ACATTCTTCG AATCGTGCTT GCCGCCGGTG TCAGTGAGTC TGTCGGCGTC  
4141 TGTGAAGCCG CTGAATTCGC AGAAATCTGA ACTAATTTTCG CAATTTGACT GCCGATTCCC  
4201 GTGTTCAGAG TGGAGAAAAA AATTGGATTA AGCACTCGAA GTATGAGCAG AGCACTTAAA  
4261 GTCCTCTTTA TCAAATGCTG TTCATGTTGT TCATCTCCAA ATCGGCAACC AGCACACTCG  
4321 GCGGCAATTG TCAAAAGCCG CGTGGCAAGT GGAATAGTGA GTAGCCGCTG ATCTACAAAA  
4381 TTGACGAGAA GCTCAACGGC TCCTCCTCCA CTGTCTAGAT TCTGTTGTTT CAGAGATTGT  
4441 GAGAATTGTG CATTTCGAG AAGAAATTCG TCGAATGGAG TTTTGAATAA TTTTCGGAGG  
4501 CATTGAGTGA TAATTCAGT GGCAAGGGAA TCTTTTCGAA AAACATCTTC AGCTGTTGAG  
4561 GTTACCAGTA TATCATTGAT TATTCGCTG TAAGAGAAAT TTTTCAGGAAT TTTTGTAGTAT  
4621 CATTGGAATT TTCTACATAC TGATAATAGA TTTTCTTCAC GAGTTTCTGA AATTTCTCTGA  
4681 TTTTTTTTCT GATATATTTT TAGGTTTCGC TGAATATTTT AAATTTATCT AAAGATTTTC  
4741 TGGAATTTTT TTTTAATTTT TAAAGATTTT TCAGAACTTT CAGGGACTTT TTTTAAGGTT  
4801 TTAATTTATC GGGCTTAAAA AATATTTTTT CTAAAATTTT CCAATAAAAA TTTAAAAATT  
4861 AAAAAATAAT TTATCTAAAT TTTTTTTGTT GTTGTAATTT TTAGAATTTT TCGAATTTTT  
4921 CTGAGAAATT CTAAATTTTC GACAGAATTT TATGGAATTA TTTAAGATTT TTCAGAATTT  
4981 TTAGAGATAA TTTTAAACGT TCTAATTTAT TGGGTTAAAA AAAATCTTTC TCTCAAACGT  
5041 TCGGAAATAA TTTTACATTT TCTGTGATTT TCTAAAACTT TCCAAAAAAT TGTCGAATTT  
5101 TTTGGAACAT TCTAGATAAT TTTGATTTTT TTTATTCCTC AAATTGAATA AAATGATGAA  
5161 TAAAAATAAT AAATAAATAA ATAAATAAAT GCAATGTTCT GTGTTTTCTG AAACATCTTG  
5221 AATTTTTCTG AAATATTACG GTCATAGGGA AAAAAATTCC GGAATTTTCA AAATTAGTTT  
5281 ATGAATTTTT TTTTTGAAA AATATTCTAA ATTTCCGGAC TTAGCGAAAT GTTTGTGCTA  
5341 CTTTATATAT TGTTAGGATT AGCTGATTTT CGAAAATTTT CTATAACTTT CTAGTATTTT  
5401 TTTAATATAC TTTAAATTTA TCTAAATATG TTTTTGTTGT AATTTTTGTT TTCGAATTTT  
5461 TTGGTATTTT TGGAATTTTC CGAATTTTTC TTGAGAAATTC TAAATTTTCG GCGATTTTCT  
5521 AGAATTTTAT GGAATTTTTA ATGATTTTTC AGAATTTTTA GAGATAATTT TTAACGTTCT  
5581 AATTTATTGG GTTTAAAAAA AATTCTAAAA TTTTCGAAA TAATCTAAAT TTTCTGTGAT  
5641 TTTCTAAAC TTTCCAAAAA ATTTCCATAAT TTTTCAGTATT TTTTCTAAA AATGCTCACC  
5701 TTATAACTTG GCTCATAAAT TGTGGATTAA GCGCATATAA ATGTGAAATG CACGTATACA  
5761 TAAACTGTTT CAAGTGTGAC GGAAGTACTT GTGATGGCCA CGAGAGAATC GACGACGGGC  
5821 ATTCACTGCA ACAAAAATTT CATAAAATTA GCTAAGGTTT AGGCATTTTT TGCACATTTT  
5881 TTGCACATTT TTAGCACATT TTTAGCATAT TTTTGCACA TTTTGCACA TTTTGCACA  
5941 CTTTGCACA TTTTAGCAC ATTTTAGCA CATTTTTAGC ACATTTT TAG CACATTTTTA  
6001 GCATATTTTT TGCACATTTT TGTACATTTT TTTGCACATT TTTGCACATT TTTAGCATAT  
6061 TTTTGCACA TTTTGCACA TTTTGCACA TTTTGCACA TTTTGCACA ATTTT TAGCA  
6121 CATTTTTAGC ACATTTT TAG CATATTTT G CACATTTT G TACATTTT T TGCACATTTT  
6181 TGCACATTTT TAGCATATTT TTTGCACATT TTTGCACATT TTTGCACATT TTTGCACATT  
6241 TTTAGCACAT TTTTAGCACA TTTT TAGCAC ATTTT TAGCA TATTTT GCA CATTTT GTA  
6301 CATTTTTTTG CACATTTTTT TTCACATTTT TGCACATTTT TAGCATATTT TTTGCACATT  
6361 TTTGCACATT TTTGCACATT TTTGCACATT TTTAGCACAT TTTTAGCACA TTTT TAGCAC  
6421 ATTTT TAGCA TATTTT GCA CATTTT GTA CATTTT T G CACATTTT T TTCACATTTT  
6481 TGCACATTTT TTGCAAAATT TTTGCTTTC ATTTT T GAT TTCATCATT TTGATGTCAA  
6541 AATTAATTTT TGAATATATT TATTTCCAAT AATCAAGTTA ATTTT AATGG CAACATTTTA  
6601 ATATTTT CAT TTAATAATTT CGAAATTTGT TTTTTT GTT TGATTATTT C TAACTCTTGG  
6661 CATTCTTTG TGATTTCTTG CAATCCAAAA AAAAACTTC GAAAAATCG GTAATTTTCC  
6721 GTATGTAGTG AAATTCTTGG AAAATCAATA TTTAAATTAC AACGAATTTT GAAAAATCG  
6781 AGTGGTTTTT TTTGCGATTG CAGTGAAATT CGATGAATTT TTGCGAAAAA TATCGAATTT  
6841 TCCGTGTATT TCCAGAAAAA TCACCACATT CATTTTT AAT TCAAATTCGT ATTTT TAAA  
6901 TCTAAATTTT CATGTTAAAA CTGCATTTT TTAATGTTT TTGAGTGAAT TTCGAGTCTT  
6961 CTCACTACAA AATTAATCAT TTTAGAGGAG TTTCAAAT GCGATTTTTT ACCAAAATTG  
7021 CCCATTTTTT CCACTTTTAA ATAGTTTTT G ATGGGTTAAA GCTAGATTTT CTGAATTCAG  
7081 CATATATGAA TTACCCGTTT TCAACAAATT CAGAATTTCT TCATTTT G CCAATTTT T  
7141 TCTCAGTCAT TTAATTTTAC TGTCTTTTTT TAGGGCAAAA AAAATAATTT TTCTGAAAA

|       |            |             |             |             |            |             |
|-------|------------|-------------|-------------|-------------|------------|-------------|
| 7201  | GATCGAAACC | ACTATATTCT  | TAAACAAGGG  | CAATTTTTTA  | ATGTTTTTGA | GCGAATTTTG  |
| 7261  | AGTCCTCTAA | CTCCAAGTTC  | GAACAATTTT  | CAATTTTATCG | CGTCGAGACC | CCCCCCCCC   |
| 7321  | CGTACCGTAT | CATATCCAAC  | AACGGTTTAT  | ATCGATCCAA  | TGGTAGAACG | GGACACCGAT  |
| 7381  | TTCTCTGTGC | ACGAAATACG  | AATCCAGTTG  | AATCGGCTTG  | TGATTGGCAT | ATACTTTCAT  |
| 7441  | TATTCTCATT | TAGACAAATT  | GTCACTGTCA  | CACCGCACGG  | GCGTCCTCTC | TTTCCAATTG  |
| 7501  | ATGAGTGACT | ATTCATTGAT  | AGTTGAATAT  | TTGTACTGCA  | CGTTGGAATA | CATCTGCAAA  |
| 7561  | AAAATCAACC | GAATATCATA  | ATAAAACATT  | CCCGAAATTT  | TTTGGATATA | TTTTTTTTAA  |
| 7621  | ATTTTCCAGT | CAAAGTTTTG  | GTAAATTACC  | ACAAACATTT  | TTGAAAATAA | TGAGCTTTTA  |
| 7681  | AAGGTGGTGT | AGTCGAATTT  | TTTATTGCCA  | TATTAGACTC  | AAAATTGTCT | GAAAACACCG  |
| 7741  | AATTTCATAA | TGAAACTTCT  | TGAAAACATC  | TCAAAAAACA  | GTTATGACGG | CTCAAAAAAT  |
| 7801  | GGCCTAAAA  | TAGTTAAAA   | TCGAAATTTG  | ACCGACTTGT  | CAAGCGGCTG | GAAATTAACCT |
| 7861  | TTTTCTGAAA | TTACCGTCAA  | ATTTTGAGTA  | TACAAGTCAA  | TTATCTTGCG | TTTTCAACTA  |
| 7921  | GATTCAGGTA | TTTTAAAGTC  | GATGGACGGC  | GAGATTTTTG  | TATTTTTTTC | AGCAAATCTC  |
| 7981  | GCCGTCCATC | GACTTTAAAA  | TACCTAAATC  | TAATTGGAAA  | CGCAAGGTAA | TTATATTGTA  |
| 8041  | TACTCAAAAT | GTTACGGTAA  | TTTCAAAAAA  | AAGCTAGTCT  | CCAGCCGCTT | GACAAGTCGG  |
| 8101  | TCAAATTTCA | AATTTTCACT  | AATTTTAGGC  | CATTTTTTGA  | GCCGTCATAA | CTTTTTTTTT  |
| 8161  | GAGAAGTTTT | CAAAAAGTTT  | CATTATGAAA  | TTCGGTGTTC  | TCAGACAATT | TTGAATCTAC  |
| 8221  | CGTATATCCT | CTATTAGTAA  | GGCGTGCAAA  | ACTAATTTTC  | GAGCATTTCT | TTTTCTTTTT  |
| 8281  | TTTTCCATTA | ATTTATGGCA  | TGATATCATC  | TATTTCAATA  | ACAACGTATG | AACCAAAATG  |
| 8341  | AACGAATTTT | ACGACTGATA  | CGCAAAAATT  | GTCCGAGTTG  | TACTCATATT | TTGCCAATTT  |
| 8401  | TGACTTGTTA | TACCAAGTCT  | GTAAGAATTT  | TCCTGATTTG  | TAAAACGATT | TTATTTTGCA  |
| 8461  | AATTTTGAAT | TCCTGAAAAT  | AGGAAACAAA  | TGAAGGGGTG  | CAAAACTAAT | AGAGAATATA  |
| 8521  | CGGTAATAAC | GCAATAAAAA  | ATTCTACTAC  | ACCACCTTTA  | ATGAAACCAA | GAGTAGTTTA  |
| 8581  | GCATGTTCCG | ACCCTTACAT  | TATTTTAATA  | CGAATAATTA  | AAATAAAATA | AAAGTATTAA  |
| 8641  | AAATGTAAAA | AAAATTTTGG  | TCGATTTCCA  | AAATTAAGAG  | TGGCAAAAAC | TGAGTAATTG  |
| 8701  | CCACTTTTTG | ACAGTAAATA  | GAAAATTTTC  | AAAATTGCAA  | AAACATTTTT | TTTTAATTAA  |
| 8761  | AAATGTTTTT | TTTTTGTTGA  | AAATTTTCA   | AAACAGTAGA  | ATATCGATTT | TTTCTGTTTT  |
| 8821  | TTCTTATAAA | ATCATAACTT  | TCATATAACC  | AAAAACACTT  | ATTTGAAGCA | ATTTTTCGGA  |
| 8881  | AAATGTACCG | AAATGTTTTT  | TTCTATAAAT  | ACTTTACTTC  | AGAAAATTGA | AGTTTTTATG  |
| 8941  | GTTTTTCTGG | AAAAATTTCC  | AAAAAATTTT  | ACTTTTTTCC  | AGCAGAAGAA | TAAACTACGA  |
| 9001  | TTTTTTTTTT | GGAAATCCAG  | AATTTTCATT  | AAAAATCTGT  | AAAAAAAATT | TTTTTTAGCC  |
| 9061  | TTTTTCCGCA | ATTTTTCAAC  | ATTATTTTGT  | TTAATTTTTT  | CAGAAAAAAC | CTAGTTTTTA  |
| 9121  | GGTATCTCTG | TTTTCAAAAA  | AAAAATTTAA  | TTTTCTAAAA  | AGTTTCAGAA | AAAATTTTTT  |
| 9181  | TTTTAAAAGA | AAATCAAATT  | TTTAGTATAA  | AATTTTTTGT  | AAACTAATTC | AAATGAAATT  |
| 9241  | TATTTATTTT | TCAAAAACCT  | AATTACGATT  | TTCGGCAAAA  | ATATAAATTC | ATGTTTTTCA  |
| 9301  | AATAATATTC | AGAAAATCAC  | ATATTTCTCT  | CAGAAAAAAA  | ATCATATTTT | TAATTTAACC  |
| 9361  | AATATACTTT | TTCCAGAAAT  | TTCCGGGAAA  | AATACCTTTC  | AGAAAATTGA | TTAATTC AAT |
| 9421  | TTTTTCAACA | TAACCTCTAG  | TTTTTTCTCA  | AAAAATTTAA  | AAAAAAGAT  | TTAAAAAAG   |
| 9481  | GGTTTCTGAA | ATAATTTTCC  | ATCAGATAAT  | TATTTTTATT  | AAAAATAAAA | ATCCGAACCT  |
| 9541  | ACTTTTTTCC | AGCAAAAAAA  | ATCAATTTTC  | GAAATTATTT  | TCCGGATAAT | AAAAAAAATA  |
| 9601  | ATACCCTAAA | GTTTTTTTTCA | AAGAAAATTA  | ATTTTTTAAT  | AAAAAATTAT | TTCAAATAAA  |
| 9661  | TTACCGTTTT | TTTTTTCAAA  | AGTGAAAATT  | TAAAAATTTA  | TTATAATTTA | ATTAATTTAC  |
| 9721  | TTTTTGAAAA | AAAAAGTGAA  | ATTTGTTTGA  | AACAATTTTT  | TATTAAAAAA | TTGATTTTTT  |
| 9781  | GAAATTTTAT | AAAAAACTA   | ATTCTGGAAA  | ACTGCTGGAA  | AAAAGTAAGT | TAAGAATTTT  |
| 9841  | TTTTTAAATT | TTGATTTTTG  | GAAATCAAAA  | TTTTCTTGCA  | AAAACCACTT | TTACAGAAAA  |
| 9901  | TTAAAATTTA | AAAAAAATTA  | TTTGATGGAA  | AAAAAATAAT  | ATTCAGAAAA | TGACAAAACA  |
| 9961  | AAAAAGCTTC | AGTAATTTTT  | CGGAAAAATA  | TTTCTATTTT  | CAAAAAAAA  | ACTCACGGAA  |
| 10021 | TAACAAATTT | CGAGTCAATA  | ACAACGACAG  | GCATCTCATT  | GGGTCCTTTA | TTACCAGCAG  |
| 10081 | GAGCAAATGC | ATTAGAAAACA | CCAATTTTGA  | CACCATTTCAG | TGATACTTGT | GCCGAATAGA  |
| 10141 | ACATATCAGA | TTTTAAGAGT  | TCCGATCGAA  | ATTTATCAAT  | TTCAATTGAT | AATATTGATA  |
| 10201 | CTTGAGAGTT | GGGTTACCA   | ACTGATATTG  | TTCCTTGAAG  | CATTGGTGGT | GGCACGTCTT  |
| 10261 | GATAGATTGT | TCGGCTTCTG  | CAATTTTAGA  | ATAATTTTTT  | TTCAAAATTC | GGGAATTTAA  |
| 10321 | ACATTAATTT | AATTTAAAGT  | GTTATACATT  | TTATTTCTAA  | TTGAACATTA | TTTAAAGAAA  |
| 10381 | CAGTATCCTC | ATCGAGGATA  | CTATTTCTTT  | AAAAGTGGAG  | CACTGAAATT | TGAGACTTTG  |
| 10441 | CGTTTTTAGA | CCCAAAATGT  | TCCAAAACCTA | CCAAATTCG   | TAATAAGACG | TTCTGAAAAT  |
| 10501 | TTCTCAAAAA | AAAGTTATGG  | TGGTTTGAAG  | TTCTGGAAAA  | AATGGTATAT | TTTTTTAGCT  |
| 10561 | AAACTCTCAA | ATTTTGCCAA  | CTTTTCAGCT  | GTTGCAGCAG  | TTGGAACCTA | ATTTTTATTT  |

```

10621 GATTACCACA CTTTATACAT ATTATCGTAG TTTATTACGC GTTTATTTCT TGATTGCCAT
10681 GCTTTTTTCGG TCGATGGGTG CACAAAAATG TATTATATTT GTGCAACCAT CGATCGAAAA
10741 AGCATCTCAA TCAACGAAAA AACGCGTAAT AAACCTACCAT AATATGTATT AAATAGTGTT
10801 AATTAAATAA AAATCAAATT TCAACCGCTG CGACACTGAA AAGTTGTCAA AACTTGAGAT
10861 TTTAGCTAAA AAAAAATTA CCATTTTTTC CAGAACTTCA AACCACCACA ACTTTTTTTG
10921 AGAAATTTTC AGAACGTCTT ATTACGGAAT TTGGTAGTTT TGGAACATTT TGGGTCCAAA
10981 AAAGCAAAGT TTCAGATTTT GGTACTCCAC CTTTAAAGAA ATAGTATCCT GAATGAGGAA
11041 ATTGTTTTTA ATGCAATATT CGTGCTCAAA GTTACGAATA TAACAAAAGA AAAACGGGGA
11101 AAATCCGTTA AAATTGAGCA TTTCAAGTCA GAAAAATCGA CAGCGAAATC CTAGGCCACG
11161 AGGATTTTTT TTCAAATTTT TTTTGTCTG AATCGTATTT TTCCAAGGAT TTTCTTCAAT
11221 ACCTTCTTCC CAGTTTTTCT CAACTTTTTG AGAAGGAAAA AAAAATTTCA ACAGAATTTGA
11281 GAAATACTTG TTATTTCTAC ATATTCTGAT AATTGTTTTA GCAAATTTAA TATTATAGAA
11341 AGCATGTGAA AATGTTTTAC TTTTTGAGAA ATTAACGTG TTTTTTTTCA ATTTTCGTAT
11401 ACTTTCATAG AATTATGCAA TGCGCATATA GATATAGATT TAAGGAGTAT GCAATTTTTA
11461 AAAAAAATT TGAAAATTAG TCGTAAAGAA CTTCTCGAAT TAAAAAGTG AGATTTTCTT
11521 AGAATTTACT ACTACATATT TGGTTTTTTT TTCGATTTTA TTTTATTTGA GACACTTTAA
11581 TAGTAGAAAC AATTCCGGTA GTTTTGTGTT AAAATGCAAT TTTTGTGATT TTGAAAAATT
11641 TTCTGAAATT TCGGTATTTT TAACCACTTA AATTTAAAAT ACCTATCTAG AAACCGAAAC
11701 CACCAAATTT TCTAAAATCT TGATTTTTTA AACATTCCTA CTTAATTGAG AAATTCAAAT
11761 CAACAGAACA AAAACCTCAA TATCCGAATC CATTTGAGAA ACGCTGTGTA CGGTCGAAAG
11821 CATAAATAAA GTGTCGGCGG CTGTTGTTGA GGAAATGATG GTGACAGAAA TAGACATCCG
11881 TCTGCACAGA ATACAGACTC ATCCAACCAA AATAGAGTAC ACGTCGACAA ATCCACCTGC
11941 TGCCGTAGTT TTGATCCCTG GAAAATTGAT ATAGGGAATT ATTTAAACCT GATCGGGAAT
12001 CAATATAATA AATCTGGAAC GAAAAATAAC CAAGATTATT ATGCATATGC ATATTTGGTT
12061 TATTATTATG TATATGTACA GTGCTCCACA TAATGATACG GCCACCCAG AATTATGATA
12121 GAACGCCTCT TTCGACGTGT ACTGAGAAAT AATTTTTTAT TGTGTGGAAT GATACTCTTG
12181 AACAACATTT ATTGATTATA CAGCGAAAAA AAAATAAAGC TGTGCAAGCT AGAAAAATCA
12241 ATTTTTCTGA TTTTTGCACT TTTTCCAATC CACAAAATGA TACGGCCACC CTTTGTTTTT
12301 TTTCTTATTT CGTTTTCTTT GCAAGTTTTT TTTTGCTAAA CGTTAGTGTT ATGATTCATT
12361 AGTGTTTTTA CAGCGATGGG TCGTGAATTT ACTTTAACTG ACTACGAAAA AGGAGAAATT
12421 GATGCAAAAC TATCTCAAGG CTTGTGCGAT CGTCAGATTT CTCGTGATTT GAAACGCTCG
12481 AGAGATATGA TCACTCGATA TGTTTTCAAT CCTGCGGTTT ATGGCACCAA AAAGTCTTCT
12541 GGTCGCCAC CACTTCTTTC TGATCGAGAC AAGCGGAAAA TCTGTGTCG A

```

//

```

LOCUS          45      1203          2668 bp      DNA      linear PLN 25-FEB-2004
ACCESSION     45          1203
VERSION       45
ORGANISM      C.elegans
FEATURES
  CDS          CHR ---
              join(1000..1053,1111..1202,1260..1668)
              /translation="MFLRLSRPHHDTINILTSTYQSLVNSARILFVEKGYQAVSID
              EISGKAACYKQQLIMIDAYITTKTDLTNGWSALESIFEHYLDYIIDNNKNLIPIQEV
              MPIIGWNELEKISLEYITGKVNAIVSKLIQENQLKAYDDDLKNNLLNGWFMHIAIHA
              KNLKELADKKGFIAIYRGFLLSLKDK"

```

ORIGIN

```

1  AAGAGGCTGA CTAAAAGCAA TCCAATCTCA TGCCAAATTC TATTGTATAA ATCTCGCTCT
61 AAAGGCCGAA AAAATCAGCG CTCGACACGG ACTCATTGTC ACCACCCGTC ACCTAAAATC
121 TACTCAGCGT CGGCAAAGGA GCCATGGATT CTAGCAACTA ACTTACCTGT TGAAATTCGA
181 ACACCCAAAC AACTTGTTAA TATCTATTCG AAGCGAATGC AGATTGAAGA AACCTTCCGA
241 GACTTGAAAA GTCCTGCCTA CGGACTAGGC CTACGCCATA GCCGAACGAG CAGCTCAGAG
301 CGTTTTGATA TCATGCTGCT AATCGCCCTG ATGCTTCAAC TAACATGTTG GCTTGCGGGC
361 GTTCATGCTC AGAAACAAGG TTGGGACAAG CACTTCCAGG CTAACACAGT CAGAAATCGA
421 AACGTACTCT CAACAGTTCG CTTAGGCATG GAAGTTTTGC GGCATTCTGG CTACACAATA
481 ACAAGGGAAG ACTTACTCGT GGCTGCAACC CTAAGTCTCT AAAATTTATT CACACATGGT
541 TACGCTTTGG GGAAATTATG AGGGGATCTC TCAGTGCATT GCCTCCAATT CCCATAATTT

```

```

601 ATTACGCCGA TAATAACTTG GTGTAACCTT AAAAATGTAC TTAAATCGAC GTGTAAAAGA
661 TTGTTGGGAA TCAAATTGAT ATTTTAATGC GATCTCAAGG ATAGTTTTTT TCGTCAACCT
721 CAACTCAACA GCCGCTTTTCG TCAAACGACG AGCACGAATA TAGCTAGCCA GTGTGACCCC
781 TGTTACTTTT TTGAACAGCC GCTGAAAATA CCACTTGGTA TAACCCGCTT TATTCGCCAC
841 ATCATCAAGC AGTAAAGACT GATCTAAATT ATGTTCAATC CATAATAGAA CATCTTTGAT
901 AACCGTTGTA TGAAACTGCT TATCATCATA TCTTAATTGG ATGTTATTAG CTTTATTTTG
961 ATAGCGAGAA TGCTGTTCAA TATACATAAA ATAACCTAAA TGTTCTTAAG ATTGTCACGA
1021 CCACATCATC ATGATACCAT AAACATACTG ACGGTATGTT ATTTTAAATC TATCATGGAA
1081 AATAAAAAATC ATCAACAAGA AAATTTTAAG AGTACCTATC AATCACTGGT TAACTCAGCA
1141 CGAATATTGT TTGTTGAAAA AGGCTATCAA GCTGTTTCAA TAGATGAGAT CTCGGGAAAA
1201 GCCTTGGTGA CCAAAGGTGC CTTTTATCAT CACTTTAAAA ATAAAAACA ATTACTCAGT
1261 GCCTGTGATA AGCAGCAATT AATTATGATT GATGCCTACA TCACAACAAA AACTGATTTA
1321 ACAAATGGTT GGTCTGCCTT AGAAAGTATA TTTGAACATT ATCTTGATTA TATTATTGAT
1381 AATAATAAAA ACCTTATCCC TATCCAAGAA GTGATGCCTA TCATTGGTTG GAATGAACTT
1441 GAAAAAATTA GCCTTGAATA CATTACTGGT AAGGTAAACG CCATTGTCAG CAAATTGATC
1501 CAAGAGAACC AACTTAAAGC TTATGATGAT GATGTGCTTA AAAACTTACT CAATGGCTGG
1561 TTTATGCATA TCGCAATACA TGCGAAAAAC CTAAAAGAGC TTGCCGATAA AAAAGGCCAA
1621 TTTATTGCTA TTTACCGCGG CTTTTTATTG AGCTTGAAAG ATAAATAAAA TAGATAGGTT
1681 TTATTTGAAG CTAAATCTTC TTTATCGTAA AAAATGCCCT CTTGGGTTAT CAAGAGGGTC
1741 ATTATATTTT GCGGAATAAC ATCATTGTTG GACGAAATAA CTAAGCACTT GTCTCCTGTT
1801 TACTCCCCTG AGCTTGAGGG GTTAACATGA AGGTCATCGA TAGCAGGATA ATAATACAGT
1861 AAAACGCTAA ACCAATAATC CAAATCCAGC CATCCCAAAT TGGTAGTGAA TGATTATAAA
1921 TAACAGCAAA CAGTAATGGG CCAATAACAC CGGTTGCATT GGTAAGGCTC ACCAATAATC
1981 CCTGTAAAGC ACCTTGCTGA TGACTCTTTG TTTGGATAGA CATCACTCCC TGTAATGCAG
2041 GTAAAGCGAT CCCACCACCA GCCAATAAAA TTA AACAGG GAAA ACTAAC CAACCTTCAG
2101 ATATAAACGC TAAAAAGGCA AATGCACTAC TATCTGCAAT AAATCCGAGC AGTACTGCCG
2161 TTTTTTCGCC CCATTTAGTG GCTATTCTTC CTGCCACAAA GGCTTGGAAT ACTGAGTGTA
2221 AAAGACCAAG ACCCGCTAAT GAAAAGCCAA CCATCATGCT ATTCCATCCA AAACGATTTT
2281 CGGTAAATAG AACCACACC GTTGCGGGAA TTTGGCCTAT CAATTGCGCT GAAAAATAAA
2341 TAATCAACAA AATGGGCATC GTTTTAAATA AAGTGATGTA TACCGAATTC GATTGCGTCT
2401 CAACCCCTAC TTCGGTATCT GTATTATCAC GTGTATTTTT GGTTCACGG AACCAAAACA
2461 TAACCACAAG GAAAGTGACA ATATTTAGCA ACGCAGCGAT AAAAAAGGGA CTATGCGCTG
2521 AGAGATCCCC TCATAATTTT CCCAAAGCGT AACCATGTGT GAATAAATTT TGAGCTAGTA
2581 GGGTTGCAGC CACGAGTAAG TCTTCCCTTG TTATTGTGTA GCCAGAATGC CGCAAACTT
2641 CCATGCCTAA GCGAACTGTT GAGAGTAC

```

//

```

LOCUS           1           1296 bp           DNA           linear PLN 25-FEB-2004
ACCESSION      1
VERSION        GeneMark.hmm v3.0 self_training
ORGANISM       C.intestinalis
FEATURES       CHR      ---
                CDS      join(500..586,677..796)
                /translation="MNSQLSCNLESARKLVDELKYHTNISRLPVSQAATELLNYVLE
                NQGRDFLLVKPPDNPFPKSSCMFL"

```

```

ORIGIN
1 TCGCCTAATT AAATTATATT TTTTAACTT TAATATAGCA AAAAAACAA TAATAAAGTA
61 AGTACTCATT TTCAATTA AAAATTTTCGTC CCCGATAGTC TCGAAGCAGC TGTGAGGTTG
121 TAAAAATAGAA GATCCTCAGA TTTGATAATT TATGTTGTTT GTATGCGGAG GGTGTGGTCA
181 CAAAAAATGT TAAGATTGGT GTCTAAAATA TAGTAATTGG TCGAAACCTT TTGGTAATGT
241 ATGGTCGTAG AATGTGCTGT AGTTATAGTT CCTGCAATTA TGTTATTTAT AAGTGCCTTT
301 GTTGAAAAAG TGTATGCGCG TATTGCGCGT ATAACAAACG TTCGAAGTGC AATATCCAAA
361 ACTTTGACCT AATTTAGCCG CGTACAGACG TATATGTGTA TTCCTATTGC TGCAATGGTA
421 TAACCTATTC TACTTCTTGT AGGGTTCATT GCCTTACGGT AGGTTGTGCC TATAATTATA
481 GGAATCAACA AGAGCAATCA TGA ACTCCA ATTATCTTGT AATTTGGAAA GCGCGAGAAA
541 GCTTGTGGAT GAACTGAAGT ATCACACCAA CATATCAAGA CTACCGGTAA GCAAATACTT

```



```

601 AATTATGTAT G TACTATATC TAGTTTCCTT ATTGATATGT ATTTTACCTA TATCTGATTG
661 GCATTTTTTCA TTACAGGTCT CCCAAGCCGC TACAGAGTTG CTGAACTATG TTCTAGAAAA
721 CCAAGGGCGA GATTTTCCTGC TGGTGAAGCC TCCAGATAAC CCCTTCAAAC CCAAAGCTC
781 ATGCATGTTT CTCTGACAAA AGCTGCATGC AGCACTCCAA ATAAACTTCT ACTTTTGGAG
841 TGTCTAAATA GGAACTCTAT GATTCGGTGC TGAATCATTG TGCAATTGTA TTTTAAAGCA
901 ATCGCGAAAA GTGAAAATTG TGTGCTTTTA TTCTCGGTAC AAGTCTAAGC TCTTATCTCT
961 TCATTTAAAT CTTGTAAGTT GTAGCAATAT TCTTTTTTCT TATATGGTAC CAAACAAACC
1021 AGTGGCCTGT GAAGTGTTTA TCAGTGATGT ATGCTTCTAT GTAAATACGT AAGGTATAGC
1081 ATGCCTTAAA TGAACGATGG TTAAGATGAT TCAACTTAAG TTGCACTCTT GTTTGGATGA
1141 ATGTCAGTTT GTTTTTTCGC TCGTTGTTAG TTAATGAAC TATGTCCTCT TCAGTTGACT
1201 AAGGAAAATA GTACTGCTGT CTTTATTAAT TTAATTTCT TTTACCAACG GCTCTTTCAG
1261 TGTCTTGTA CAAACCAATG AAATACATCA TTTATG

```

//

```

LOCUS          2      1425 bp      DNA      linear PLN 25-FEB-2004
ACCESSION      2
VERSION        GeneMark.hmm v3.0 self_training
ORGANISM       C.intestinalis
FEATURES
  CDS           CHR ---
                complement(join(415..571,831..925))
                /translation="MTDVIHDEVEIEDFEFDEETETYYYYPCPCGDKFEISLEELQSG
                EDIATCPSCSLLVKVIYDPDFLLDEAKEVGTNESVKQTA"

```

ORIGIN

```

1 AGAGAATTTA ACAAACACCT GTAAAACAAA AAAATCATAA CCTTACACTT ATTTTCAGAA
61 AAATTCTCAC TGATTATTAT GTTATTTATA TTTGCTTGTT ATTTTACTG TGTTAGCAGC
121 TGCTATTTTG GTGCAGTGGT TATGCACCTG TAACCCAGAG GTTACTGATT CAAGGCTTGT
181 CGTTGGTACC ATTGCGGGTG TACACTGTCA TAATAAAAAA GTTTGACCCT TTAATGCTCT
241 AGAAAAATAC AGAAACCAA CTAACTATCT TCTAATGACT TATGACTGTA CAGATTATTC
301 CAAGCTCATT GTGGGTGTAT GCTGTCTATA TAGGACAATA GATCAAAAAA AATGCTAGAA
361 AAATACAGAA ATAAAACTAA ATACCTTCTA ATGACTTATG ATGTACAGAT GATTTTAAAGC
421 AGTTTGTTTC ACGCTTTCAT TCGTTCCAAC TTCTTTAGCT TCATCTAGCA AGAAATCGTC
481 AGGATCATAA ATTACTTTAA CAAGTAATGA ACAACTTGGG CAGGTAGCAA TATCTTCACC
541 ACTTTGTAAC TCTTCAAGTG ATATTTCAA CCTGTAAAGG TAGTGTTACT AACATGAACT
601 TCTGATAAAC ATATATGGTG CGAAACATTT ATGGAGATTA CTGATTTGAA ATACAAATAA
661 GTTATTGTTT TAGTTTATAA ATTGCAAACC AAATAAAACA TATATATATA CATGGTCATT
721 TTGACATAAA CATCAAATA TTAATATAAA ACTCAAATTC GCCAACAAAA ACTGTATAAC
781 AATCACATTA TCCTAGCAGG AAGCTACAAT TTAGGCACAA AAAACATAC TTATCTCCGC
841 AAGGACAAGG GTAATAATAC GTTTCAGTTT CTTCGTCAA TTCAAAGTCT TCTATCTCGA
901 CTTCGTCATG AATTACATCA GTCATTCTTA TATAAGTTTA AACACATAAG GAACTAGCCA
961 TATATGTCTT TAAAAAAGG GGGAAATCAA GTTATAGTAT TACTAAAAAT ACGAAAAGCA
1021 ACTTTACTAT GGGCACGTGT TACAAAATAC GGGGAATCCC CTATGGTCAG TGTTACCTAT
1081 AAATTTTCAC ATTTTTTCTT AACATCGTAT GCTTATTGTT GTTGCTTGTA CATATTTTGT
1141 TGGGGAACAC TTGTTTTAAG GTATCATATT TGGGGAGCAA TAAGACACTA ATGTCTTCCA
1201 CAACCAAACG AGTTTTTTTG AGATGTAAAT GTAATATTTT GTAATGTGTG CCCGTTTATT
1261 CAGAGCTGTG CCCTTGTTTT ACGCTGTTGG CTCAAAATAA TCAATTCAAG GGCAAGTGCG
1321 AATAATGTCA ATGCCGAAAC CTTACTCAA CCGACGAAAG TACATATGAA ACTTCTTACT
1381 TCTGTTTGCC GTTAAGTTTC TTATGTGTAT CAAATACACA CTGCA

```

//

```

LOCUS          3      2311 bp      DNA      linear PLN 25-FEB-2004
ACCESSION      3
VERSION        GeneMark.hmm v3.0 self_training
ORGANISM       C.intestinalis
FEATURES
  CDS           CHR ---
                complement(join(500..584,1594..1811))

```

/translation="MSRNYSKYALNVARLSSRIFCEPLPESANRGKHVDKYLRELPY  
YKDRSFTHYYPPVSNINLLRLTLRNHGLFVDEHKDFKEEMELQRNLRGKGRSLKKS  
L

ORIGIN

```
1 TATTGTGTCT TTACAATTTG AAGAAGATAT TAAAAAGTGA GAACTTGTGA GTATATATAG
61 TGGCTGAGGG TTACAACATA AAGATATATG AATTTTAGCA CACACTAAAG ACCAGACCCC
121 ATCTCATGAC ACACAATCAA TAAATAAGAT ACATAAATAC AACATAAACT TGTTAGGAAG
181 GTGGTCAAGG GAAATGAAGG GTCGAAAAAC AATGGGATGT GATTTTTGGT TGTGATATTA
241 CTCATATATT TTATTAACCT TCAATCTTTG GCTTTAAATT TGCAGTTTGA AATATGTAAT
301 ATTTGCAGTT TGAAAAATAT AATAGAGTCT ACACCTTGGC ACATAGGAAG CAAAACACAT
361 GCGAGCATGG AAGCTCTACA GGCTGCATAC AAGGTTGGAG ACAGATTGCG CAATCTATTT
421 CTTCTGTGAT TGTTTATCAT ATAATAACAA TCTGTTCTGG CAAGGGTCTT TCAATAGTTC
481 GAGTTTGCTT AAAATAAAAT TAAAGAGATT TCTTCAAAGA TCTTCCTTTT CCTCGAAGAT
541 TTCTTTGAAG TTCCATTTCT TCTTTAAAGT CTTTATGTTC ATCTCTGTAA TCAAAAAGAAA
601 TTACATAAAT ATGGTATATC AGGAACTGTA AAAGTCTCCA AATATTATAC AGAACTTATA
661 GTTCTGTATA GTATGCTTTT CAGATGTTTG TGTGGTATTG TGCTACGATT ATCTATCCTG
721 TAAATCACAT TTTAACCAAC ATCTCTAAAA TGTTCACTAT ACTTTCTTAC TATTAATTTA
781 AGAAAAGACA GGATAACTTT TCCGACAGAT GGCCTGAGT TAATTTATTA TTTTGTGTG
841 GAGAAAAAAT GTGTGTTTTT TTAAATTACC TACTAAATAA TAAATCAATT TCTAGTTAAC
901 ATGGGTAATA CTGCCGCTGG TGACCAGTGA AAATTTTGGT TTCAAATGT TCCTTACGTC
961 TCCCTGATAC CGGCTGTATA TTTGTTTTTG AAAAATCTCC GGCGTTCGTG TTGAAAATTA
1021 ACTATGAGAA TGCAAAAGCA TGCTTCGTCA CCGTAATTCG CCTGACTTGC TTAAGGTTAA
1081 CGATATACTA CGTCACAATA GCGATATGAT ACGTCACAGT TGTGACATAT TACGAAAGTT
1141 ACAGCACGTT ATAACCTTGT TTTTGCCTG TTTTATGCTA GGGAAAACCC AAAGCCCCAT
1201 TCCTAACCCC TACTTTTAAAC CCCCACCCC TAAATCCCCC CAAAAACTA ACAATTTACG
1261 TAATCTGTAA CGTAGAAATC AAACGTGGTA ATTCGCATTT TATGACGTAA CAATCTAAC
1321 TTTGTCTAAT CCATGACGGC TGGTGTGGAA AATGACGCAG CACGATTTTC TGCATTTTCA
1381 AAGTTAATTT TCGACTTGAA CGCCCGAGTT TTTTCAAAA AAATTTATAC AGCCGGTATC
1441 AGGGAGACGT AAGGAACATT TTGAAACCAA AATTTTCACT GGTCACTAGC GACAGTATTA
1501 CCGTTAACGT GTATCCTTAA AATAATGGTG ATCGTTTGGT AAAAGCAATG TACTTAGTGA
1561 CATTTTAACT ATTTCAAAA GCACAAAAC TACACAAAAG GTCCGTGGTT TCTTAGTGTT
1621 CGTAGTAAAA GATTAATATT TGATACGGGC GGGTAATAAT GAGTGAATGA TCTGTCTTTA
1681 TAGTAAGGTA ACTCCCTCAG ATATTTATCG ACGTGTTTTC CTCGATTGGC AGATTCAGGA
1741 AGTGGTTCAC AAAATATGCG CGAGCTTAAT CTTGCTACGT TAAGTGCATA CTTGGAATAA
1801 TTACGACTCA TATCCTAAAA CGTTCATTTA TATCTACAAA TTGTTACGAC ACATGAAACG
1861 AAATTACATA CAAACTTACA GGTATGGAAA ATCACAATA ATCACCTACC AAAGTGATCT
1921 CAGGGTATAG ATTATTGCGG CCATTTTTGA TACTTTCTAT TGGTTCTCCA ATAGATATCT
1981 AAACATATTG GTAGGTACTC ATAGCAAATA GCATGAATTG TATAAAAAAA CAACATTTTT
2041 TTAGAAAAAA TATTTTATAA ATAAAATCCA AGTCTTGTAT GTGGCAGAGT GGAAAGTGTC
2101 GAAAATGACG GTCAAAACCT GACGCTATGT ATACTATATA CTTGGATCAC CTTGGTCTAA
2161 AAATTCCTCA AGAATCAACT AATTTAAAAA AAAAAGTAAA TTACTTTTAA GGAGTTCGTT
2221 GAAACATGGA TCAAGAAACA GCAAAAGCTT TATTTAAAGA AGGAGCATGC TTATTGCTGC
2281 AAGGAGTTCC TGAAGGGACA GAGTTTGGGA T
```

//

```
LOCUS 4 1308 bp DNA linear PLN 25-FEB-2004
ACCESSION 4
VERSION GeneMark.hmm v3.0 self_training
ORGANISM C.intestinalis
FEATURES
    CHR ---
    CDS 500..808
        /translation="MAGKVFRSFMP LFDRVLVQRFAPETTTKGGIVLPEKSAGKVL
        R
        ATVVATGPGVEDKDGKLPVTVGPGDEVLLPEYGGTKVTLGDEEFHLFRDGDILGKF
        SN"
```

ORIGIN

```
1 AACCTGATTG TTTTCTGTCC CAGAGGGTTC CAGTCCATTC TCTCGCCAT ATTGAAGAAT
```

```

61  ATAAGTTTTTC CGACCATATA ATGTCCAAAC CTTTGTAAAC AAACAATGAT ATAGGATCTC
121 TATAAAATAG CGAAAAAAGG TGACGCACCG AAGCGTGAAA AACGTGGATG ACTGCGCTCA
181 AAAAAAGTGGT GCCAAAAGAT TACCTTTACT GTCTGTATTG TGAGTTTAAA TACTTTAAAA
241 TTGTATTTTT AAAGCAAATA GACTAAACAA ATATAAAATC ATAGTATACA ACTGAGTTCT
301 GAAGAAATAT TCGTTTTAT ATCAAAGTAC CGCGATACGA AAATACCGTA GTGCATCACT
361 TTTTAAATTG GGAAGTACC AATCCGAGAG ACTTCTAGAA TTGCTACAGC GTTGCCTCAG
421 CGTGTAGTTA CTATAGGACT TGTAGTGGTA ATTGCAGTAG TTTAATTTCA CCCCCAACG
481 CAAATTATAA AATACAAAAA TGGCCGGGAA AGTTTTTAGA AGCTTTATGC CTTTATTTGA
541 CCGGGTTTTG GTTCAGCGTT TCGCCCCAGA AACTACCACG AAAGGCGGGA TAGTACTGCC
601 CGAGAAAAGC GCCGGCAAAG TCCTTCGCGC AACTGTAGTA GCTACCGGTC CTGGTGTGTA
661 AGATAAAGAC GGAATAATTG AGCCGCTAAC TGTCGGGCCT GGGGATGAAG TTTTGTCCCC
721 AGAATACGGA GGAACAAAAG TGACCGTACG GGATGAAGAA TTTTATCTTT TCCGTGACGG
781 AGATATCTTG GGAAAATTTT CAAACTGAAA AACTATTTG CTCTAAAAAA TCCCGTGCTT
841 AACCAAATCT CTCTGCTCAA AACCTGCCAA TTTCAGACCT AAAGTCATTT GCGGAGTTAT
901 TTATAATTTT AGTGTTGTTT GGCTTTTTTC ATTTCTTCAT AGTACCAAAA CTGCAGTGTA
961 TGTTTATATA ATTACACTAT GATCTAATAA AATCGTGTTT GGTGTATTGT GAACTTCATG
1021 CATACTTTAC GACAACTGCA ATTTAAATAA ACTGGATGTT TTCTACTTAG ACTGTTTCGTA
1081 CGCCTTAAGT TTTTTTGCAA TAAAAATAAT TGACAACAAC AATCATCAAT CTGTAAGCAG
1141 AAAAAAATGC AGGTAATGCT GTAATAGTAG GGCACAACT TGAAATTTTT ATGAACGAAA
1201 GATTTTTTATT GGAAGAAATT TCTTAATTTA GTTGTGTATG AGTATTTTGG ATAGAAATCC
1261 AAATTTTAGG GCATTTTTTC GGAATATGGC ATTTGTTTAA CCAAGAAT

```

//

```

LOCUS           5       1338 bp       DNA       linear PLN 25-FEB-2004
ACCESSION      5
VERSION        GeneMark.hmm v3.0 self_training
ORGANISM       C.intestinalis
FEATURES       CHR ---
                CDS       complement (500..838)
                /translation="MAGNSLQNGMDEQLLSFEKLDLDRSSPDLWPEQLSVTDFLSGLKS
                PASPAVKWGGQLDDDDIDMLQEFGNLTTTNLMEKVVRELQNLAYQLGLDESREMTRGKL
                LNILDKPKTNQR"

```

ORIGIN

```

1  TTTATTATTA ATGCCATTTA AAATATAAAA ACAAAGCTTG CACAGTGCTT ATTCAATTGA
61  ATTTGTCACCA AATATATTTA GAATAAACCT CCATCTCACC AGTTACACCC GCCTTTACGA
121 CTCTTTGAAC GATCGCTTTC ATTTTAAAAA CGACAAATCT AAATATATCA ACTTTTATTT
181 AATTCATTTT TCATTAAAAA TTCTTCAAAA TAAAAAATA CTTGTTTAAAC CAACAATATT
241 TAACAATGAA TGTAAGCGT GTGATAGATT TATATATTTT CACATAAAAT ATTCTTTTAC
301 AATTCATCT ATTTTTTTAA TAAATACATT TTCTGCTTGA ATTCGCAATA AATGTTGTGT
361 AATGAACAGG TTTACATAGA AAATAAAAAA CTCACAAATG AAATCACTAA AATACCCTCA
421 TTGATTGAAC ATGTACCACA TTTCAACACG TGTTGTAACA CAGGGAAGTA TTACATTACA
481 ACAAACCAG GGAATATTT TATCGTTGGT TTGTTTTTGG TTTGTCCAAA ATATTTAAAA
541 GTTTTCCCG GGTCACTCTA CGTGACTCAT CTAATCCAAG TTGGTACGCC AAATTTTGTA
601 ATTCCCGAAC TTTTCCATG AGATTGGTTG TTGTTAGGTT CCCAACTCT TGTAGCATAT
661 CTATGTCGTC ATCCAGTTGT CCCCCCACT TCACAGCGGG GGAAGCGGGA CTTTTTAACC
721 CGGATAAAAA GTCCGTTACA GATAATTGTT CCGGCCACAG ATCGGGTGAC GAACGATCCA
781 ATTTCTCAA ACTTAGAAGT TGTTTATCCA TGCCGTTTTG TAGTGAGTTA CCTGCCATGT
841 TAGCGCAACA AAAAAACGAA AAGAATTTCT CAAAAACACG TCATGTGACG TCAGATCCTT
901 GAGATCTTAA ATTCCAATCA GGGAATCTCC CCGCAGTAGT TTCGACAAA GTTCCAGACA
961 ACTCGACACT AATGAGTCAC CTCACCCGAT GTTGTAAACAT GTAAATGTTT TGCGCCGAAA
1021 ATGAATAAAA TTCACACCTA TTTAAAATTC ACGTATTTTT GGGTATTTAT AAAATAAACA
1081 CAAAGTAAAA ATGCACCTTT AAAAATTTCA TGCATATAAA ATTTAAATAT TCCACTATTA
1141 AGTAATGTTT AAAAATATTC ACCCTTGAAA TACTTATGAC CGAATAAAGG AATTACCCAA
1201 ATTTATAAAT AATTTTTTTA GTAAATAAAG AAAAAAATC ATCCGGCCAT GTAAGTACCC
1261 AGTAATATAT TATTCTAAAT CAAATATAAA TTAATATTTA TTTCAAATGT TAATAACTCA
1321 AAGTTTAATA ATGTTGGC

```

//

LOCUS 6 1395 bp DNA linear PLN 25-FEB-2004  
ACCESSION 6  
VERSION GeneMark.hmm v3.0 self\_training  
ORGANISM C.intestinalis  
FEATURES CHR ---  
CDS 500..895  
/translation="MAEKLEVLEACLEQFIENVRQLGVIVTDFQPQGGQEVLNQKINS  
TITCLKDIENCKASVSDIHVPLEVFDYIDSGRNPQHYTKDCIEKSLMKNEALKGKID  
VYGKFRQELMTQIGKVYPQQIIEYKQARGEL"

ORIGIN

```
1 ATAAACATCC ATGTAAAGTA AGAAGTGATC TTTTAAATTT TTTAGTGATT TTTTGTTATA
61 TTTTAAATTT TAAGAAGAAT TGTATAAAAG CATTTCGGGAA AAACAAAAAT ATTGTCATTT
121 TAAAATTGAA AGGGATGTGT AAAAGTTTTT GGATTTACAA CATAGATATC GTGTATTTTT
181 ATAAAAGAAA GAGCAATGGC GCGGTGTTTCG ACGTTTGATA TACAAAATA CATGTCAGTA
241 TAGATGTTTT TAAGTAGTTT TAATATTACG AAAGTGATAC TGTAGTGCCG TACTGGTGAA
301 GCCCTTGCAG ATTAGGCTAG CCAGTTATAA TGGTTTAAAT GGTAAGGGC CATTGGGGCC
361 TTGACCTGTT GACCAGATAC CGTAGAAGGG AGATTCTTTA TTAGCACCTA GTAATGTTTT
421 ACTAATTTCC ATAGAAATCT AACAACTGA GGTATTAAGT TGCTTTAAAC TATAACAAAC
481 TCCTTCATGT ATAACCTAAA TGGCTGAAAA ATTAGAAGTC CTTGAAGCGT GTCTTGAACA
541 ATTCATTGAA AACGTGCGGC AACTTGGTGT AATCGTTACT GACTTCCAAC CACAGGGGCA
601 GGAGGTGCTT AATCAGAAAA TCAACTCAAC TATTACATGT CTTAAGGATA TTGAGAAGT
661 TAAAGCCTCA GTTTCAGACA TCCACGTGCC GCTTGAGGTG TTTGATTACA TTGACTCTGG
721 TAGAAACCCC CAGCACTACA CAAAAGACTG CATCGAGAAG TCGTTAATGA AAAACGAAGC
781 CTTGAAAGGA AAAATCGACG TTTACGGAAA ATTTTCGGCAG GAATTAATGA CTCAAATTGG
841 AAAGTTTTAT CCACAACAAA TTATCGAGTA TAAGCAAGCA AGGGGGGAAC TCTGATAGTT
901 CTTTCTAAGC TTAACATC AACATTGCAA ATTTGTTCTGC GCATAACATT ATTTTTTACA
961 TCTTATTTTT TAAGTTTCAA TCATGGATGA TAAAAAATCA ATTTCATTTG GATTTAAAAA
1021 GAAAATCCAG ACCAAGGTGG ATGAAAGTAA AGTTGTAAAA GATGCTCCTG AAGAGAGCAG
1081 CACCAAGGAC TTTCTCACAG AGGTTGATGC TAAAAGTTTG CAGAAGGTGA CTCCAAAGGA
1141 ATTGTAATC CCTCTCATAT CAAAGAATAG ATATGTGATG CCAAAAAAAG AAAAAGTACA
1201 AACAAATGAG ATAAGTGCAG GAATTGAAGA TGAAGCAGCA AAGGAACTAA TGGCAGAATC
1261 AAAACAGTTT TTGGATCAAG CTCCTACGGA AGAACAAAGC AATGAAGATT TTGAAAACAT
1321 GGCTGTTTCT CTTCTTTTAA GAAATAAAGT CCCGGATGGG TATGAGGATG ACACAGTATT
1381 GGATGTTTCG ATCCG
```

//

LOCUS 7 1753 bp DNA linear PLN 25-FEB-2004  
ACCESSION 7  
VERSION GeneMark.hmm v3.0 self\_training  
ORGANISM C.intestinalis  
FEATURES CHR ---  
CDS join(500..703,772..882,1173..1253)  
/translation="MELSLKNELLASFAWYTVIVVLKMMIMSIICVMHRIRNKAFVN  
EEDTKAFGSSVKGKLATVTNASVERVRRCHLNDIENIIPFVIIGFAYILTDPAVETA  
IFHFQPSRFVFCMSGYMATLSMAFRTLAAALY"

ORIGIN

```
1 CCGTAGCCGC AATGAGCTAT TGCTTTTTAC TATCGTCAAA AAAACAAATC ACATACCATA
61 TATTCCACAA ATTGCGGCGG GTAATTGGCT TAACCAGGTT CTAGTGTTTT AACTATCCGG
121 CATTATACCG TGTATTTCTG TTACCTGATA GCCGACGGGT TTTGCTTACA TATCCAGAAG
181 CCAGCGAAGC GTAACAAAGT TTGTCACGGG AAAGAAGCGC TCTGTGTTAA CTTTAGTTCA
241 GTTAACCGCT CTGCAAATAA GTGTTGAGCA AGTGTATTAA CAGATTTCGAC GTACAGAATT
301 ATTAAGGCAT GGCAACTTGT GTGTAGTCTG TATTATGTGT ATGACACGAG TCATACACGT
361 TAATTACTGT ACGGTACAAG TTAGATGCGT CAAATATAAC AGAATAGAGT TAAATGGAAA
```

421 ACTTGGTTAA GATGTTTCGT AGTTTAAACAA ATTGGCTTTG GATTTTTAGT GAAAAGTAGA  
 481 CGATTGTTAC TGCTTTGCCA TGGAACCTAG TTTGAAAAAC GAGCTTCTTG CCAGCTTTGC  
 541 TTGGTACACA GTAATAGTTG TGTTGAAAAT GATGATAATG TCGATTATCT GTGTAATGCA  
 601 TCGAATTCGC AATAAAGCAT TTGTAAATGA AGAAGATACA AAAGCGTTTG GTTCATCCGT  
 661 AAAAGGCAAA CTTGCAACAG TTACAAATGC TTCAGTCGAA AGGGTATGTA GTGTGCTTCG  
 721 TTAAAAAGCT TCATTTATCG TTTGTTGTTG TTTAATTATT TCCAATTCTA GGTTCGACGT  
 781 TGCCACTTAA ACGATATTGA AAATATTATT CCGTTTGTTA TCATTGGTTT TGCTTATATA  
 841 CTGACAGATC CTGCCGTAGA AACTGCTATA TTTCAATTC AGGTAATGTT AAACCTTTGTG  
 901 CATTTAGAAC TGTAACGTT GGTCTTTTGT GTGCTGTATA AGAACTTCGT GTATGTACTG  
 961 TCTATTATTA GAACGTGCAA AACAAAGAAC TCTTAGTGTT TACACGATAA GCACCGCAAC  
 1021 GCTATACAGT TCATAAAAAA CTAACTATAA TTGTTGTTTT AGCAAATTTA CATGAATTC  
 1081 TATAACAATC AATAAAAATG GAGGTTATTT TTCAGCTCTT CACCGGCTCG AGGATTTCCC  
 1141 ATACTTTCTG TTACTTGATT CCAATTCAC AGCCATCTAG ATTCGTATTC TGTATGTCAG  
 1201 GATATATGGC TACTCTATCA ATGGCATTCC GCACCCTGGC TGCCTCTAT TAATTTTTAT  
 1261 GCAAAAACGG AAATTACAAA TTTATGAAAT TGATTTTCCA ACTGCTACAA ATGGATTTAA  
 1321 TTGACTTTTT ATTACAAAAT GCTATGTAAT TAAATGTATG TCATGCTATT GTGGAGATAC  
 1381 AATACGTTTG TATTTTGTTG TTTCTGACTA GCCCACATAT TACTATTCCA TTACAAACAT  
 1441 CGTATTATAT CGATTCAAAC CTGTCAAAC TGGAACAACA TGAAACATAT GGTAAAAAAC  
 1501 ACTTTCGTTT TTAGATTTTT AAATCCATCT TTATTCGCTG TATAATCGAG AAAAATAAAC  
 1561 ATTGCAAAAT TCGAATCATT TTTGAGTTGG TGGTGCTAGA AGTGACATTG GCATAAATAC  
 1621 TTCTGTTTCT TGCTTTCTTT GTGCTGACTC GACGCCGTCT TTGACGAAAC TATCCTTGGA  
 1681 AGAAAAAGCT AATGTACCGT CTATTATTTT GGATGAATCG GCATGAATGT CTGTGAACAC  
 1741 GAAATTTCTT GAT

//

LOCUS 8 1419 bp DNA linear PLN 25-FEB-2004  
 ACCESSION 8  
 VERSION GeneMark.hmm v3.0 self\_training  
 ORGANISM C.intestinalis  
 FEATURES CHR ---  
 CDS 500..919  
 /translation="MSVDIRLDQNVEKVPEVDLHHIPCKIEANETANISKFFCPKSV  
 KTESKETLSASFRGRPLDGKNITLPDGYIGAVITEKQRPFSEEENRELDVTGKFKVF  
 TKWYLGSQLFAGGNSMDKACLTWTSNLASVIHDPVEPKHD"

ORIGIN  
 1 TTCCCCCACC CTAACAAAAA AAATTAGGTT TGTAGGAATT TTGAAAAAAT GTTAGTTGTT  
 61 TACTCGCAGT ATCATCGTCA GCTTCGGCTT CGGCAACCAT TTCTGAATTT GCGATCTACA  
 121 AACATAGATA CCTGCTTTAA ATCTATGTTA ACAACGAAAC TGTTATGCTT GAGTAGCCAG  
 181 CGAGTAAAAT AAACGAAATT GAACTTTGAC CTAGAAAAGC ACACGAGGTG AAGCTGAATC  
 241 GTTGTAAGA TCGGATTTGT TTTGTTGTGG TACAGCTCGT AGATGTTAAT ATTGCTAGAG  
 301 GGATGTATTG CTGTAAGTAA CCTCGGTGGC TTTCATAATG AAAGCGAACG CCTTTCATCA  
 361 ACAGAGTAGC TTGTTTCGTCT GCTATGTTTA ACAAAGTTTG TAATAAGTGA TAAGAACTTC  
 421 GGTGCTAGTG AATTGTCATA ACAACATGTT TCTTGTTTCC ATAGAATGCA TTTGCTTTAT  
 481 TTTTGATAAG AATAAAATAA TGAGTGTTGA CATACTTTTA GATCAAAACG TTGAAAAAGT  
 541 ACCTGAAGTG GATTTACATC ATATTCATG TAAAATTGAA GCCAACGAAA CTGCAAATAT  
 601 TTCAAAGTTC TTTTGCCCCA AAAGTGTTAA GACAGAGAGT AAAGAAACAC TGTCAGCTTC  
 661 TTTGAGGGGG AGACCTTTAG ATGGAAAGAA TATTACTCTT CCTGATGGTT ATATTGGAGC  
 721 AGTAATAACG GAAAAACAGA GGCCATTTTC TGAGGAGGAA AACCAGGAAT TGGATGTTAC  
 781 TGGGAAGTTT AAAGTATTCA CAAAGTGGTA CCTTGGTTCA CAGTTTGCAG GTGGAAATTC  
 841 AATGGACAAA GCTTGCTTAA CATGGACCAG CAATCTTGCT TCTGTGATTC ATGATCCTGT  
 901 TGAACCAAAA CATGATTGAA GACCTGGCCA CCTCAGTAAA ACTAAATTC AGTATCAAAG  
 961 CATTCTTGT GATTTCTTTT TTAAGGCAAA CTTCTTTAAA ACATGTTTGC TAAAGCTATA  
 1021 ACTCTAAAAT GTATTTTATT ATTCCTAAC AATGTAACAT TTACATCACA TACAAATCTT  
 1081 CATTATTTTT TGAAGGTTTT TTATTGATAT ATATAATTGT AGTATATTGT TACTAAAGA  
 1141 CGTTTCTGTA ATTATTTGTG AGATCATCTT TCAAGAATTC ATAATGGAGC TTCATAACTT  
 1201 GGATTTAATA ATATTCAGTG AAACAATACG GTTGGTGTTT TCTAACATAC TTTCATAACC

1261 TATACTCTCT ATGACTGTTT GTTGCTACAT AAAATAATAA TTAAATAATA TCCCAGATATT  
1321 TGTCCGGCGC TGTGTCAAAG TGGTTAGCCC GCTTGCATTT AACTTGGAGG TAATGAGTTC  
1381 AAGCCTCGTC GCTGCTACCA ATTTTGACAT ATGTGTCCT

//

LOCUS 9 1934 bp DNA linear PLN 25-FEB-2004  
ACCESSION 9  
VERSION GeneMark.hmm v3.0 self\_training  
ORGANISM C.intestinalis  
FEATURES CHR ---  
CDS join(500..653,846..1007,1295..1434)  
/translation="MTEVTSRARLHCRIAYSLFGIAIGVSVFVIWLTVFDNRKETYA  
TVTYGGLSGVLAAWNLIHIMHYQDLWRTWLKGLRRLFIGGGLLFLGITGISFVTFVLV  
LAIYLNQSDLVRSYYITAIWCALSAKWSFLLFWYSRNYRNEFADLTALLEF"

ORIGIN

1 TATAGGACGC TTAATAAGCT AAGTTCTGAG TACACATATG TCAATCGCGT TGGAATATTA  
61 GCTTTAAGAA AATTTCTAAG TTGTAGTAAA GGGTTAATTA ATATTATGTT AACTAGTTTA  
121 ATGCGTGCTC ACTCATTAGA GCTTTGTAGA ATTAATAAAA TGTTTTGAAA TCATGTTAAG  
181 TATACTGTAA GGATTGCGTC CATAATATTG TATCATGTCA GCGTTTCTTT TTGCCATATA  
241 CATTGAATA GGCATTAGAT TATCTTTCTA GTAGCCTATC TATGCTTTTA CGATTTACGT  
301 AACCTTGTTT ACCAAATCGT CACGAATGAG TTAAATCACG TGATCAAATA CAAAAGCATT  
361 TCATCAGCAT TTCCCATAG CGAGATAGTT CCGTAGTATT TACGGCCATG TAAGCATTGG  
421 TTAAAACGAA TTTTACTTAT TATTTGTAGT GTTACTATTG TTGTTTAGCT GAATAATCTG  
481 GATGGACTGA ACTATCGAGA TGACAGAAGT AACGTCACGG GCTAGACTTC ATTGTAGAAT  
541 CGCTTATTCT TTGTTTGAA TAGCAATTGG TGTTTCTGTG TTCGTGATCT GGTTGACGGT  
601 GTTTGATAAT CGAAAGGAAA CGTATGCAAC AGTTACATAT GGTGGTTTAT CAGGTATTGA  
661 AAATGTTTAT ATTATATAAT GAATAGCTCA AAAGCAATTT AGTTTCTGT ATGCTGTATT  
721 TGAATTGTA ATGATGATAT ATTTGTGCTT TGTTTTTATA TTATGAGGGC AAAAGTAAAT  
781 TAGTTTTATG TAGTGTAT TTGTTATGGT AGTGACTAAA GATTTATGTT TTGATCTACA  
841 TATAGGTGTG CTGGCAGCAT GGAATCTAAT TCTCCACATC ATGCATTACC AAGATTTATG  
901 GAGAACTTGG CTTAAAGGGT TAAGATTGTT TATTGGCGGT GGACTCTTAT TCTTGGGCAT  
961 CACAGGAATT TCTTTTGTTA CTTTTTAGT TCTTGCCATT TATCTAAGTA AGCTATTATT  
1021 TTATGGCAAC TGTTTTATTG TAAGTGTGAA TGAAATTTCC TGGTGTACTT GTTAAAGTCT  
1081 GTGCACATAT ATTATATGAT TTACCACCAA TTCAGCTAGG TCAAGTTCGT GTATTTCTAG  
1141 CTGTTTAGAA TGCCAGTTTG CTTTAGCCTT TTGTATACAT GATTCGAAAA AGAATGGTTT  
1201 GTGCATATGG ATACACAGT GGGCAGTGAT GATCGTTGCC TTATGATATG TTTTATATCT  
1261 AGTATAAGTA ACTAATTAGG TTTATTATTT ACAGATCAAA GCGACTTGGT ACGGAGTTAT  
1321 TACATCACAG CTATATGGTG CGCTTTGAGT GCCAAATGGT CTTTTCTATT GTTTTGGTAT  
1381 TCTAGAAACT ACAGAAACGA ATTCGCAGAT TTAAGTGCAT TACTCGAGTT CTAATAACAAA  
1441 TTAATTTATT TATTTTTGTT CCAATCATAA GAGAAGTACC AACTGAAATA TATGTGTTTG  
1501 TTGATTGTAT TTTCACAGTA TTGTGACTAA AGATTAATAT GTTCATTGGT GCAAGTTAAA  
1561 AATTATATTT TTTCTGCATT GCTTGTTACT TTAAGCTGTT GCGTTGAGTC AGGCACCTCT  
1621 GTGGTGAAAA GTAGTGTATT TCATGCTCGT TAAATTTATT TTTGTTATTT AAGAGTGGCT  
1681 GAAAATAATA AATTGCAGAG GGTATAACAT TTTCCATTCA AAATTGCACA TTTTTGCTG  
1741 GATAAGTCCA TGCTATACGA TCAAACAATT TTTAAGCAAT CTTCTACCT TAAATTCATG  
1801 AAGTAGCAGT ATTTTTTAGG TTGTTTTCAA AAGTACTGAT AACCTATTAA CGTGCATATT  
1861 GCTTTCAACT GCATTAATAA AATTGGTCTA ATAAAACATT GATGACATGT TTTTGGTTGA  
1921 AAGTATAATC TACT

//

LOCUS 10 1677 bp DNA linear PLN 25-FEB-2004  
ACCESSION 10  
VERSION GeneMark.hmm v3.0 self\_training  
ORGANISM C.intestinalis  
FEATURES CHR ---

CDS join(500..709,863..973,1040..1177)  
/translation="MSAFTLENEAFSGLVFYGGGLCLAKTAAMSMVTAYHRITKGAMP  
TEEDTRMMTKDPEKMKKMLVPNDDVERSRAHLNDLENVVFPVLLGLLYVSTNPPAD  
SAILHFKIFFWARVLHVSVAIICKLRSPSRGVGFLLGFATTISMLYRTISAVY"

ORIGIN

1 CAGTTGCTAA TGTGTGCTTC TAAAATTCTT TTTCTTGTG TTTGCTCTGT CTTATAAATT  
61 GATAATACGT TGTGGGAATG CCGTAAGAAG AAATTAGAGT TCCTATTCAA GGTTTCAGAT  
121 GAAGACCAAT TTAGTTGTTT TTTTATTCTC TCTATTTCGCC GTTAGTTTCA ATGGTCATGC  
181 TCTACTAGTC TACTACTTTA CTGTTGGACG TTCTGCTTAA ATAGCAAGCA TTGTAGTGAG  
241 AAGACTATGT AACCAATGAA TGCTGCTCAG AAACAGTAGG TTGATTATTA GCAGAGTGGT  
301 AGGACCAAAT AGAACTTTGT TTGAGCAAGG TTTGAGTGGG ACGCACAGGC TAAAGTGCTG  
361 CTAGTCACGT ACGGTCTGTT GTACCATATA AAGGTACCGG TAGCTGTGGT TTGAGGTGGT  
421 TTAGATTTTA TAGGACGAAA TTTAGTAAAA TCTGTTCAAA TACGTCTCTT TTTTGTATAC  
481 TAGAACGTAG CTACATAAAA TGTCAGCTTT TACATTGGAA AACGAGGCTT TTTCTGGGTT  
541 AGTTTTCTAC GCGGGGTTAT GCCTTGCAAA GACAGCAGCA ATGTCCATGG TTACTIONATA  
601 CCATCGCATC ACCAAAGGAG CAATGCCAAC GGAAGAAGAC ACGAGGATGA TGACCAAAGA  
661 TCCGAAAAAG ATGAAGAAAA TGTTGGTTCC AAATGATGAT GTTGAAAGGG TGTGTGTGCA  
721 GTATGGTTTTA TATTAGGAAA TCCGAGATTT TAAATGTAAG CTACAAAGTA TTGTATAGTA  
781 TTTGCAAATC TTTCAATTCA AAATTGTCCT AGTTGCAAGT TTTCAAATTT TTTATTGTGA  
841 CGTAACAATT CACCTCATGC AGTCACGAAA GCGCATCTG AACGACTTGG AAAACGTCGT  
901 ACCGTTTGTT CACTTGGTT TACTCTACGT ATCTACGAAC CCACCGGCAG ATTCTGCTAT  
961 TTTACATTTT AAGGTAACAC ATTAACGAAG TGGAGGTTT TGTGTTGAAT TACGCGCCTT  
1021 CAACGTACCT CCATTACAGA TCTTTTTCTG GGCTCGTGT TGCACCTCAG TGGCTTACAT  
1081 ATGCAAGCTT CGGTCGCCGT CCAGGGGTGT AGGTTTCTTT TTGGGATTTG CAACAACAT  
1141 CTCCATGTTG TACCGCACCA TCTCTGCTGT TTATTAACT GAAAGCTCTC TTACACGTCC  
1201 GAACCATGTT ATCGTGTTTA ATTAAGCAA AACAGCAATT TTGACACATA TAAAAAGGGT  
1261 GCAATTTTTA CACCAAAAAA AAGAACAAT AAGAAATGTG CAGTTTTTAC ACAATGTTGT  
1321 GCTACGAAAA ATTAAGAAGG TATTTAGTGT AGAAATGCAT CCATATGTTA TTGTCGTGCG  
1381 AACAAATTAT AAATAACAAT TCACATAGAA AACATTCTGT TTACTTTTCC CGTAAATTTA  
1441 TATCATTCAA ACAAAATCAA ATAATTATGT GGACTTAACA ATTAGGCTAC ACCTACAGCT  
1501 CAATTGGATT TTTCCACTTT GCCCAGCAAT CCTCCAGCTA TTTACCAAAT TAATTATCAT  
1561 GACTGTATAT TTTCACTAAA AAACCTGGCT TAAATCATAT CGAACACGGC CTACTCAATG  
1621 TATTGAGTAG TCCATGTATC GAAATAAATA GATTTTATAA TATGTATACT AGAAGCC

//

LOCUS 11 1503 bp DNA linear PLN 25-FEB-2004

ACCESSION 11

VERSION GeneMark.hmm v3.0 self\_training

ORGANISM C.intestinalis

FEATURES CHR ---

CDS 500..1003

/translation="MHCVFVLLVLVSVNYKVSIAIPLHASCISIQWFPSTVCDDVVRTK  
LVNQIKTWSGKCTHSGEKCLYKLIRNDDLKVTATHHTPVKKNYVDSLTFTRTSQKIR  
FADDSTWCVMKGYRSRNTWYAVLDHGTNYCNLHNLITGSLNNTKGYEENTNDSICT  
QYTSADCTKY"

ORIGIN

1 TGTAGAAATT GTTAAAACCTG CTTTGTTTTT TTGAGTAGCC TATAATTTAT TGTTTGTATA  
61 ATATTCTTAC TTAGAGCTGT GGGTCGGTTG GGAAATGTAT ACGTCATAAC TGAAGGATAA  
121 TGGGTTTACA ACATATAGTC AGTAAAACAC TGTTATTTAA CCAATGTCCA AACCAGGGGG  
181 TAATAATATC AAGTCCTGAT GCTGCTACCA TTGTGAGCGT ATTTGTTCTT GTGCAAGACC  
241 TAAACAACGG TCATTGCACC AACCCTGAT TGTTGACATT TCATTTGTCT TATTTCTCTC  
301 CCGTCAAATA AAAACTACTC AACCAGCAAG AACGTTATTG TCATGTGCCT GTGACGTAAT  
361 AAACCTCATA GTTGTAACA ATGTTTACCG ATGCAACGTC GAGACGGAGA TTCCTCGTTC  
421 TGCAACCGTG TACATTAATA TAGTTTTTCA TCTCGTAACT ATACATACTT TTTACAGCGT  
481 TAATAGCTGT AGCTTTATAA TGCATTGCGT ATTTGTGTTA TTGTTCTGG TGTCAGTTAA  
541 CTACAAAGTA TCGGCGATCC CACTTCATGC TTCTTGTTC ATTCAATGGG AGTTCCCGTC

```

601 AACAGTATGT GATGATGTCC GAACCAAGCT AGTCAACCAA ATCAAAACAT GGTCGGGCAA
661 ATGTACACAT AGCGGAGAAA AATGCCTTTA TAAATTGATT AGGAACGATG ATCTAAAAGT
721 TACTGCAACC CATAACGACC CAGTTAAGAA TTATGTGGAT AGTTTGACTT TTACATTTTCG
781 CACGTCGCAA AAAATACGTT TCGCCGACGA TTCTACGTGG TGTGTAATGA AAGGTTACTC
841 AAGGTCAAAT ACGTGGTACG CTGTGCTGGA TCACGGAACA AACTATTGCA ATCTACATAA
901 CTTGATCACT GGTAGCGGGC TTAACAATAC AAAAGGGTAC GAGGAGAACA CAAACGACAG
961 CATATGCACT CAATACACAT CCGCAGACTG CACGAAATAT TGAAATGTTA ATATTATGTT
1021 GTTATTTGCA AATAAAATAC AAGTTTGAAA ATTTCTTTTC GTGTAAACTT TTACTGACTG
1081 TTTAGTATGC TGCATTGCAC GTGACATTGT CTTGTGAACT GCAAATAAAA TATTGATGCA
1141 ATAAAAAAT GTTGGTAACC AAAACAGTTA TTTTAAAGCT ATAAATATAA TGTCTCTATC
1201 GATTTGACTC AGCGTAGGGT ATTTCCCATT GGAAAAAAT GCGCGAATT TTGCAAATAA
1261 TTTAAGTTGT TTTGTTGTTA AAATATTCAA TAAAAGTCGT GAAAGTATGC CAAGGAAGCG
1321 AAAAAGTGAC GAAATTGAAG CGAAGGCCAC AATTTCAAAG AAACAGAAGA ACGTAGAACA
1381 AGATACGGGA AGCGAAAAAG AGCGAATCGA AAAGTTGTAC GGCATTTCTG TTTTCGAGAGA
1441 TTTTTTCGCG TTTTGAAAT TCTGCGTGGG GTTAAAACCG GAAAACCCCT TAAGTATGTA
1501 TGA

```

//

```

LOCUS           12       2046 bp       DNA       linear PLN 25-FEB-2004
ACCESSION      12
VERSION        GeneMark.hmm v3.0 self_training
ORGANISM       C.intestinalis
FEATURES
  CDS           join(500..699,926..1179,1446..1546)
                /translation="MSENIDTLCLTMLELVAEIHQKKLEQEKHMQEGYLCLAKARYS
                MGVGRVSSLQYPNEITPTVSI SCREKENNKFP SFTVTQNLQDEETQPPTS AVRRRKK
                TKKDDHNEAKQAVEEVDLLSQDKLHAQVNP LLWFGVLVPTPLRQAQNCFRQATEVSC
                QLCTLKEELNYKTRLYKEVMKPTETKG"

```

```

ORIGIN
1  GAGAATGGCT TACCAGCACT GCTGGCTTAC AAGAACAATG TTATCATTGG AAACTTTGTT
61 GCTCTATCTG AAACACTGGG GGAAGATTTT TATGCAACTG ACGTTGAATC ATTTTTACAT
121 AGCTACGGAA CTCTCCCAAC TTCAAATGAG TCGTTAAGCG ATGACTGACA ATCTCTGTTA
181 TTATTTTTTT CAGTATCTTT ATGTACTGTT ATCTGTTACA GAGTTGCATG AATGGATAAT
241 GTTTATAATT TTCCATTTAT TAATATTTTT TTAGCATGTA ATTGCTATTG TCATTCTGTCG
301 TAATGTGTTG TTATGTTTCT GTGCTATATT GTATCGCACT GTACCCGGAC AAGAGCAGTT
361 TTTAAAATAT GTATCTTTAT GCACAAACAT AAAGTTACAA CTGTATTATT CAGTAATGCA
421 TTGAATGCTT TTTTATTTTT AAAACATGA AATCTATTTA CACTGCTTTG GATGTCTTTC
481 CGAAGATAGA AAAACAGATA TGTCTGAAAA CATAGACACA TTATGTTTAA CCATGCTGGA
541 GTTAGTGGCT GAAATTCACC AGAAGAAACT GGAGCAAGAG AAACACATGC AGGAAGGTTA
601 CTTGTGTCTG GCTAAAGCCC GATATTCCAT GGGTGTGGGC CGGGTTTCAT CACTGCAGTA
661 CCCAAATGAA ATCACACCCA CAGTCAGTAT TAGTTGCAGG TAAAGGCAGC ATTTTCTCCT
721 AATTTAATGT AAATAGGTAA AGGCAGCATT TTCTCCTAAT TTAATGTAAA TATCTGTAAG
781 CATGTTTTTA CAACCGTTGG TTTGACGCTA TGTTCCGCCT TTTTTTTTTG TATCAAAGAG
841 ACAAATAAAG TTATTATTTT TGTACTGTGA TTTTACTTTG TATACTTTCT AACATAAGTT
901 TTAGACTAAT TTGTTGATAC TACAGGGAAG AAGAAAACAA CAAATTTCTT TCCTTTACTG
961 TCACACAAAA CCTTCAAGAT GAAGAAACCC AACCCCCAC TTCTGCTGTG AGAAGAAGAA
1021 AAAAGACAAA AAAAGATGAT CATAATGAAG CCAAACAAGC AGTAGAAGAA GTTGATCTTT
1081 TATCACAAGA TAAACTGCAT GCACAAGTCA ACCCATTGCT TTGGTTTGGT GTTCTTGATC
1141 CTACACCATT GCGACAAGCC CAAAATTGTT TCAGACAAGG TAAAGTTTGG GCTTTTGACT
1201 TGTTTTTTTT TAATGTATTG TACTGTGCGG AAAATGGATA CTGTTAGCAC AAAGTATACA
1261 ATGACTCCTA ACCATGTTTT CAACAATTAC CATAGCTATT TTATAGTCTG GGAATAGATT
1321 AAATTGTTCT TTAAATATTG TTTGTTTACC ACAAATGGC ACGATATGAG AAAGTAAAAA
1381 CATGGACCAT TTTTCATTAC TCTAAACTAC TATATGTGTT GATTTAGGTT AATATTGTTT
1441 TACAGCAACT GAAGTCAGCT GTCAGCTTTG TACTTTAAAG GAAGAATTGA ATTACAAAAC
1501 TCGTTTATAC AAAGAAGTAA TGAAGCCAAC TGAGACAAAA GGATAATCAC AGAATCTAAT
1561 TGACATCAAA TCATATGCTA TCTTTATAAA GCTGGCATGT AATCATTTTC AATCACATAA

```



```

1621 TCCTTTGTTT AATGTACCAC AGAATCAATG GATTTAATCA CGCAAATGCA ATAGAAGAGG
1681 ATTTGCTGGA ACATATGGCG GGATATTCTA ACCAAGAAAC ATTCAATGTA ATCATCTGTC
1741 ATATTGCATT GATTTTTTAT AGAATTAGTT TTTTGATGAC TTGTAATCAA GCTGGGAATT
1801 CCACAGTTGA TTTCTCACAG TCAATAATCA AGTAGATGGG AATGTTTTTT TGTTTATTTT
1861 AAAAAATACGA TGATCGTTTC AAAAGTAACA AGAAAAATTT TCTATCTTTA TTTTCGCCTT
1921 GATTTACTGT CAATGAAGTT GCAATACAGC ACTGAAAAAC TAAGTGGATT TTCAGGTGTG
1981 TATTATTGTA AAAAAAATA CCAACAAGAT TGACACTATT GTTTCATCTG TTTGAAACGC
2041 ATCGAG

```

//

```

LOCUS          13      1695 bp      DNA      linear PLN 25-FEB-2004
ACCESSION     13
VERSION       GeneMark.hmm v3.0 self_training
ORGANISM      C.intestinalis
FEATURES
  CDS          CHR ---
               complement (500..1195)
               /translation="MAWRCHGKSNLIDLINLRKNGIITHDAVYEGMKLTDKRFYVSS
               GAYNDSPQSIGYQATISAPHMHAAALEALHDQLTRSENPTALDVGSGSGYLTA CFAR
               MMGDNGRAYGIEHIPELVNKS IENVNRDDSTLITSGRVTLKKG DGRLGYDPNKRKTE
               LYDAIHVGAAASQVPRPLLEQLKKG GRLILPVGEPGTTQVFEQWDKNNV GELTKKEL
               MKVVYIPLTDKRKQWPG"

```

ORIGIN

```

  1 ACATCCATTC ATTCAACTAA ATATTCATAA ACTGCCAAAA AGCGACAAAG CATAAAAGTC
  61 AGGATTTTAA ATTATCGACA TTAGCCAAAT ATACATTTGC TGCAACAAAA ATAATTCAGC
 121 ACTGTAATAC ATACGCTATG GGTGAGTAAT TAGTTCATGC ATAAATTTAA TAAACCAATA
 181 TACTTAAAAAT TAGCAACTGT AGCTAGAGTT CATAATAATA TATTGTTTTG CTGAACTTAT
 241 ATAGGCCTAT ACCAAATATA CTCTTAACCT TACTCCAACC TAAAAGAACT TTAATATTTA
 301 TCACACAAAA TAAAGACTTA AATAATAGAA TTGATAAATA GGGCAATTGT TATGACATCA
 361 AAGCAAGACA GTTGAGTTCT GGAACCTGAC ACTCCACTTC TATGACATCA CAATCCAATG
 421 TTTGACATAA TAAAGACTGT TTGGTTTACA AAACCAATAT TGGTTTTTCG ATTTAACTTC
 481 TTGTATATGA GTGGACCTTT CAACCTGGCC ACTGTTTCCG CTTATCAGTA AGTGGAAATG
 541 AAACAACCTT CATCAATTCT TTCTTGGTAA GTTCACCAAC ATTATTTTTG TCCCATTGCT
 601 CAAATACTTG TGTTGTACCA GGCTCTCCCA CGGGCAAAAT AAGTCGGCCA CCTTTTTTCA
 661 ATTGTTCAAG TAAAGGCCTA GGTACTTGAG AAGCAGCCGC TCCGACGTGT ATTGCATCAT
 721 AAAGCTCTGT CTTTCTATTG TCCGGGTCAT AACCCAGTCT CCCATCCCCC TTTTCAAAG
 781 TAACCCTCCC AGAAGTAATC AAAGTTGAGT CATCTCTGTT TACATTTTCA ATGGATTTAT
 841 TCACAAGTTC TGGAAATATG TCAATCCCAT AAGCTCTCCC ATTATCTCCC ATCATTCTCG
 901 CAAAACAAGC CGTTAAATAT CCGCTACCAG ACCCAACATC TAATGCTGTT GGATTCTCAC
 961 TTCTGGTAAG TTGATCATGT AACGCCTCTA AAGCTGCAGC ATGCATGTGG GGTGCACTTA
1021 TAGTAGCCTG GTATCCAATA GACTGTGGAC TGTCATTATA TGCCCCACTT GAAACATAAA
1081 ATTTCCGGTC CGTCAACTTC ATACCTTCAT AAAGTGCATC ATGGGTAATA ATTCCATTTT
1141 TTCTGAGGTT GTTAATTTAA TCCAAGTTAC TTTTCCATG ACAGCGCCAC GCCATTGTAC
1201 AAATTATGAA TAACACCAAC CTTATATAAA ATAAAAACGT CATTTTAGGA TTTTAAACAA
1261 ATTAACCTAT GTGCCAAATA TTCAGTTCTA TGTGTAATTC CTAAAACAGA AAATAAAACA
1321 AATTTTATGC AGTTCAGGCC AAGAAAACAC AGTTACACAT ACAAACACG AGCCAATCTT
1381 TCTTAAGCAG AATACACTTA ATGATGTATA TACAAAATA CAATATACCC AAATTTCTTT
1441 TTCTTACATT TAACAGTTTT TTTTCCGATA CACAAGTCAG ATAAACCTTA TTGTGCACGT
1501 TACCTGTTAC CACGCGTTGT CCAAATATGC GACGAATCTG CACTCGCTGT TACAGTGTAG
1561 TTTGTAAACA GCAGTCGGAA TGTCTGTCAC ACGACTCCTG TTGCGATCTC TTCTAGCTCT
1621 ACAGCGGCGC TCGCTACTAC TATGACGTCA TCAGAATACT AACAGCGTGA CGCCGAACTA
1681 AATTTGATGA CGTCG

```

//

```

LOCUS          14      1704 bp      DNA      linear PLN 25-FEB-2004
ACCESSION     14

```

VERSION GeneMark.hmm v3.0 self\_training  
 ORGANISM C.intestinalis  
 FEATURES CHR ---  
 CDS complement (500..1204)  
 /translation="MTESPDTTEGTL SFFQVASDEELSDSDCSENEEAVKSEEV VPEK  
 QRSSVLPSP LCVLADAKTPEFVTSHLSSDLKWKDKMVKKAPYIAPKEFKPWENDLPAF  
 ESKSNVKDSKPDIALVKQIPSSMARPVVEVKPTPVEPKKKEIVDHAI SWSKMYKDDVE  
 DRRAYKRPRGEDEDEELRGFCHTDLDAKKVAFH SKNNQSTTHHDKEKRKRNLGQANR  
 EKMFVEDEKRVLRQEFAENF"

ORIGIN

|      |             |            |            |             |             |             |
|------|-------------|------------|------------|-------------|-------------|-------------|
| 1    | CCAAATTATT  | ACATCATAAT | TACCTCCGGT | GCCTTGGACT  | TTCAAATCGT  | TTTGATTTCC  |
| 61   | TTCGTATGTG  | AACAAAGCCC | TGAAACAAAT | CAATTATTAC  | ATCATAATGA  | ATTGAGGTGT  |
| 121  | TAGGTGTACG  | AGGTAATTAA | ACTAGAGCAA | TAAAACGAAC  | TGCAAACCTG  | GTAAAAA     |
| 181  | ACCTAACTTA  | CCAATCAGTG | TCTGTGTTGT | CATTTAAAAC  | ATCTTTGTAG  | GCCTCAACTA  |
| 241  | GCTTGGCGTT  | ATGTTTAAAA | AAATTTACAC | TCATATTTAT  | AATATATATA  | TTGTACAAAA  |
| 301  | CACTCTTCTT  | CCTGTGCAAT | GGAAAGGTAT | TCTATAAAAT  | ATGATCATT   | TGTTTAAAAG  |
| 361  | TTTAACAAAA  | CTATATCATA | AACGGCAAAC | ACCTAGTTTT  | TTGATTAGTT  | GGCAAACAAT  |
| 421  | TTAAAATAAA  | ATCCTTTTCA | AATAAAGAAA | AGGCTAAAAG  | TAATAAATGG  | AAAAAATATC  |
| 481  | AACAGTTATT  | AATGCAAGTT | TAAAAATTCT | CTGCAAATTC  | TTGTCTTAAA  | ACTCTTTTTT  |
| 541  | CATCTTCAAC  | AAACATTTTT | TCTCTATTCG | CTTGTCTTAA  | ATTTCTTTTC  | CGCTTTTCTT  |
| 601  | TATCGTGGTG  | AGTTGTAGAT | TGGTTGTTTT | TACTGTGGAA  | AGCAACCTTT  | TTCGCATCCA  |
| 661  | AGTCTGTGTG  | ACAAAATCCT | CTTAACTCTT | CGTCTTCATC  | TTCTCCCCGA  | GGACGTTTAT  |
| 721  | ATGCTCTTCT  | GTCTTCAACA | TCATCTTTAT | ACATTTTGGG  | CCACGAAATA  | GCATGGTCAA  |
| 781  | CAATCTCCTT  | TTTCTTTGGT | TCAACAGGGG | TGGGTTTAAAC | CTCAACAGGT  | CGAGCCATAC  |
| 841  | TCGAAGGTAT  | TTGTTTCACA | AGAGCTATGT | CCGGTTTAGA  | GTCTTTAACA  | TTTGATTTTG  |
| 901  | ACTCAAACGC  | AGGTAGATCA | TTTTCCCATG | GTTTAAATTC  | CTTAGGAGCG  | ATATATGGAG  |
| 961  | CTTTTTTAAC  | CATTTTGTCC | CACTTCAAAT | CTGATGACAA  | ATGACTTGTG  | ACAAATTCTG  |
| 1021 | GAGTTTTTGC  | ATCTGCCAGG | ACACATAAAG | GGGAGGGAAG  | AACAGATGAT  | CTTTGTTTTT  |
| 1081 | CTGGAACAAC  | CTCTTCGGAC | TTGACAGCTT | CTTCATTTTC  | CGAACAAATCA | GAGTCGGATA  |
| 1141 | ATTCTTCAATC | ACTTGCCACT | TGGAAGAAGG | ATAAGGTGCC  | TTCAGTATCT  | GGACTTTCAG  |
| 1201 | TCATTATAAA  | CTACCCGTCT | GGCCGTCTAT | ATGCAAATAT  | CCTATCAATA  | TCAACTAGAA  |
| 1261 | CATTTTGCAT  | ATATTGATTT | ATTAATATGA | ATTTATTTGA  | GAAATGTTTA  | AAAACATAAC  |
| 1321 | TGTAACCTTA  | ATTTATATAC | TACATTTCAA | AGTAGCGTGA  | TAATATAGTT  | ATCTTCTGAC  |
| 1381 | ACCAGACATT  | ATTATACACA | TACACATATA | TAGTTATAAA  | ACATAAATGC  | TAAGAGTTAA  |
| 1441 | AACGCGGATT  | TCCTTGTTCA | ACTTTAATTT | TATACGCCAA  | ACCTATGCTT  | GGAATATACC  |
| 1501 | CACTTTCAGT  | TTTTTGTTTA | CTAATTAAT  | CATTGACTCA  | GTGACTGACT  | ACTCACTAGG  |
| 1561 | GCAGTTTCTG  | CCGTTTAAAA | CTCTGTTTGA | CACCTACCGG  | GCAACTTCTT  | GATGTTCTGTA |
| 1621 | CGAAAGTTTA  | TAACCTCTTA | TTGCTTAGAG | GGTTACGCAT  | GGACGATTTA  | AAATTATTTT  |
| 1681 | AACCCCGCAA  | TAACCAAAGC | CTAA       |             |             |             |

//

LOCUS 15 2592 bp DNA linear PLN 25-FEB-2004  
 ACCESSION 15  
 VERSION GeneMark.hmm v3.0 self\_training  
 ORGANISM C.intestinalis  
 FEATURES CHR ---  
 CDS join (500..563,842..993,1220..1369,1578..1734,1881..2092)  
 /translation="MNSPCLRTALSGIYIRHIGALGSYTNIPKRSRYFWEARPECRE  
 RKLLMQITL PRLKQAVDPTQFVQVEVEEEKLYGLDVI LHKVQQIFNENELI AVCLYS  
 EMPSDNFYQVRYELQQHGM SMEKYPEHVMEFTLKQTPYENMLELFRGETAVIFGEAN  
 VKQMISAVSKNNY LLLLGLVQGRYMSL KELIKFSNLAGLDSSRAELGFL LNTAVSS  
 TKNMMQKPTNQLVHSLQYIEQCSNASNEN"

ORIGIN

|     |            |            |            |            |            |            |
|-----|------------|------------|------------|------------|------------|------------|
| 1   | AAACAATAAC | TGTATGAATG | CATCGTGAAT | TTTATGTTTT | TGTACCCATT | GTGCTTCATT |
| 61  | CTTTTAGTAA | TCAAGTTGTC | GTGTACTATC | TGAATACTTT | TCATATATTT | ACTACTAAAA |
| 121 | AAGCAATGCT | TATTAACCTT | GGTTTCAATC | CCAAATTTTG | GATTGGGTTA | CCCATTGTAA |

181 TGTTTCATTA AACCCCTTTAT CTGTAAACAC AAAAGTTAAA TCATTTTCTG TATGCTGACA  
241 AAAAGGTCAA TTAAGTGTTA TTGCTAAAAT CGAGTGACAA AATTTTATTA TGTATATTTT  
301 TTTGATTATT TGGTATGGTC GGTAAAAGGC TTTAAAGCAT TGGAGTAAAT GAATATCATT  
361 CTTTTTTTCT TATATATGGA AATATAAACT TCTTTTTGCA TCTTCTTAAA AATGACCTTT  
421 GCAGTGATAC ATGAGCACTG ATAATGTGGC ACCTTTTATT TTAACATTTT ATGTTTAGAT  
481 CACCAACAAT AAGTTTAGGA TGAATTCTCC ATGTTTAAAGA ACAGCTCTAA GTGGAATATA  
541 CATTTCGTCAT ATTGGAGCTT TAGGTATGTA AACTGTTTTT ATTAAGATAT GTTCCTATGG  
601 GTGCATGTAA GATTATTAAT GGTCATTAGG GATGTCAGAA CATCTTATAA GTTATGATTT  
661 AACATGTGTT CCCCAGCAGG TTTTATAGGT GTCTCTAAAG TTTTAAAAAT TATAAAATTC  
721 AATTAATGA TTACAATACT AACAGGCATT TGAGTATAAC ACTTTCTGAA ATATTACTCC  
781 CCATAAAAAA GCAAGTTTAT GGTAGATTG TTGCATTCTT TCACATAAAT TTCAATGGCA  
841 GGATCGTACA CAAATATTCC AAAGAGAAGT AGGTACTTTT GGAAGCAAG GCCAGAATGC  
901 CGAGAACGAA AACTCTTAAT GCAAATTACT TTGCCTCGTC TCAAACAAGC AGTGGACCCC  
961 ACGCAGTTTG TTCAAGAAGT AGAAGAGGAA AAAGTTAGTT ATTTTAATGT ATTTAACCTC  
1021 TCTCTTGGTC ATGGCTTATG TTAAATATAC CAGTAAGTTT TTGATAACAG AACAGGGTCC  
1081 AGTATTTGCT GACCCAAATT TAAGGTGATA GTCCTCTAAG GCCACAATTT AATTTATTGT  
1141 TATAATTCGT TCATTAACAT TTTGCAACCA ATGATTGCAC TAAAGCAATA ATAATTATTA  
1201 TAAGCCTTTT CTTCAAAAGC TTTACGGACT TGATGTGATC CTGCATAAAG AAGTTCAGCA  
1261 AATATTCAAT GAAAATGAAC TTATTGCTGT GTGTTTATAT TCTGAAATGC CCAGTGACAA  
1321 TTTTACCAA GTCCGATATG AATTGCAGCA ACATGGAATG AGCATGGAGG TATTTTGCAA  
1381 AGTTTGCTAT GATAATCTGA TTATATTGTA CATGACATTT GTTTCTGTGA CACAGGCCGT  
1441 GGGTGCCCCA TTTCATACAC TGCATTTTAT TTTGCATAAC CTTCTGACAA TAAGTAGGCA  
1501 ATATTTATTT ATTCATTTAT TTATTTAACA CATTGATAGT TTTATTTGTT TTGAAAACAT  
1561 ACTTTTGTAT TATGCAGAAA TATCCTGAAC ATGTGATGGA GTTCACATTG AAACAAACAC  
1621 CATATGAAAA TATGTTGGAG CTTTTTCGGG GGGAAACAGC AGTCATATTT GGAGAAGCAA  
1681 ACGTCAAACA AATGATTAGT GCAGTTAGCA AGAATAATTA CCTTCTTTTA CTTGGTTTGT  
1741 ATTTTATCA TTTATAAACG GATGATTTAT AGTGTATTGG ATTTTATTGT TACTAAAGA  
1801 TGTATTAGT ATTGTTTAT TTTGCACAAC TTTCTTCTAT TTTATTTAAC ATTTCTTAGT  
1861 AATTATTTCT ATTTTATAG GTGGTTTAGT TCAAGGAAGA TACATGTCTT TAAAAGAATT  
1921 GATAAAAATT TCAAACCTAG CTGGTTTGGG TTCATCTAGA GCGGAATTGG GCTTTTTACT  
1981 GAACACAGCA GTTAGTTCAA CTAAAAATAT GATGCAGAAA CCAACTAATC AACTTGTTCA  
2041 TTCATTACAA CAATATATTG AGCAGTGTTT TAATGCTTCA AATGAAAATT AAATTTTATG  
2101 TCCGCGGTTT AATAAATATT AATTCTTTTA CAACTTGTTT CCTGAATTCT AACAAACGTT  
2161 TGACCAAAGG TCACATTTAA TAATGCTTTA ATCTTTCAGC TTTTACCAAT CAATTTAATT  
2221 GTAGATTTCA TTCTAAGTCT TGCTGGTCAG GTTAGTACTA CTGTATATAG CTCTGTGAAC  
2281 TGGGCTTCAT ATGAAATGTC ATAAACTAAG GGACACAACA TATCAGAGAT CAAATTTTGT  
2341 GTTAGTTTTT GGACTTCTAT TGTTTTCAAT ATTTAAAAGCT GTAATACACG TTTTAATGAA  
2401 GAATCATAAA CATGCGTACC TTATATACTT TCTAGTGTGA ACAACTTGTT TTATGTCAGA  
2461 CAAAGTAAAA TACTTTCCAT TGGTAGTTGT AAGGGCCAAC TACTATTTCT AAATATCACG  
2521 TACTTACCTA AATTAATAATG ACGTCTGGCT AGAGAAATGA ACGTATGTTT TGTATTGATT  
2581 ACTCATGAAA AG

//

LOCUS 16 1968 bp DNA linear PLN 25-FEB-2004  
ACCESSION 16  
VERSION GeneMark.hmm v3.0 self\_training  
ORGANISM C.intestinalis  
FEATURES  
CDS complement(join(500..856,917..1155,1315..1468))  
/translation="MADKEYDGSAGIEASAAKILTRAITLEKEARLQAALICYQEGI  
DLLFDALKGCKDSAKKKHFRDKLEEYMTAEQVKTRVNHLLKAAGKYHDQTKIEENST  
GHSYASLFQPYFDEFVREVWVEDAYIRSYHQVNNFLRFCEVVTCKNVRAIHLKTT  
HDDYGNQDQQISNLESIRASLKSREIKLVIMFSSSLHDREIRLDTGWILKIGRGLDY  
FKKAEKFSLGGFFDMDMRPCHSTTVDFHNSHTRER"  
ORIGIN  
1 ATTATGCATA ATTAAACTT TAACATTACA GGAGCCTATT CAAGAACGAC ACAAGGAATT

```

61 GTTAAAAAATT CGTGACTATC TGAAGAAAAA GGTGAAGAT TTGGAACGGC AGCTCGCAGC
121 AAAACAGCTT TCCCCTTCGG GCGGACCAAA ACTAACTGTT CATTTCAGATG CAGAGCCTTT
181 GGCTGTTTAG TAATGCTTAT GCACGCAATA TTTAACAAAT GTTTCATAG TATTTGTCCT
241 AACTGTTCAT CTTTATTAGA GAGTGTGTAT TGTTCTTTAA ATGTTGATCT TTTTATAATC
301 ATATGTTCAG AATTATGTAT GTTTAAAAC TTAGCTTTGC ACAGCAGCCA TGTGTTTGCT
361 TGGTGGTCAT TAATTAAAGT GATACTTGTT ATTTTACTGA AGGCTCAAAA TTAAATGATG
421 TATGTATGTA ACCATTTGAT TTTGAGGGAT TGGGACAGTG TTTAAATTTT GTTTGGACTG
481 TACAGTATTG TTTCAAGTGC TATCTTTCTC GAGTGTGATT TGAATGAAAA ACATCCACAG
541 TGGTAGAATG GCAGGGCCGC ATATCCATAT CGAAGAACCC TAATGAAAA TTTTCGGCTT
601 TTTTAAAGTA ATCAAGACCA CGGCCTATTT TCAAGATCCA TCCGGTATCC AACCGAATTT
661 CCCTGTCAAG CAGGGAGGAA GAAAACATAA TTACTAGTTT TATTTACGG GATTGTGAGC
721 TGGCCCTAAT GCTTTCTAAA TTGGATATCT GTTGGTCTTG ATTTCCATAG TCATCATGTG
781 TAGTTTTTAG GTGAATAGCT CTGACATTTT TGCACCTTGT CACAACGAAC TCACAAAACC
841 TTAGAAAATT GTTAACCTGC AACATAAAGT ATTTAGACTA TAGTAATTTA AAAAGTGATT
901 GCACAAAATA GCGAACCTGA TGATAGCTTC TTATATATGC ATCTTCAACC CATACTTCTC
961 GAACAACTC ATCGAAATAT GGTTGAAATA AAGACGCATA ACTATGTCCG GTAGAATTCT
1021 CTTCAATCTT TGTTTGGTCA TGATATTTCC CAGCAGCTTT AAGGTGGTTT ACACGAGTCT
1081 TTACCTGTTT AGCCCTTGTC ATATACTCTT CTAGTTTGTC TCGAAAGTGC TTCTTTTTAG
1141 CACTGTCTTT ACAGCCTATA AAATAAAATG GAATATAATT TAATGGTTTC AAACCCAATA
1201 AAACCTTAGA CGAGACATAC AACTTGTCTT TCTGCTATAA AATATTTACC AGATAGCCTT
1261 TACTTTTACA TTTATTTATT TACCTTGACC AATTAGTAAT TCCTGTACAC GTACCTTTCA
1321 GTGCATCAA CAACAAATCG ATTCCTTCTT GGTAACAAAT TAACGCCGCC TGTAGTCGTG
1381 CTTCTTTTTT CAGTGTAATT GCTCTCGTTA ATATTTTTGC AGCGGAGGCT TCAATACCAG
1441 CTGAACCATC GTATTCTTTG TCCGCCATAC GCTTTTAATT TCGACGGATT GAACATTGAA
1501 GGGTTAAAAA CAAAATTGAG ATTCAGGATA TGACGTCAA TGACAACGGC TCGCTCGAGA
1561 CTAAAGTCAC ATGACCAGCA TCGTTTTTCA TTGCTTACTG CTTTGTTCGC TGGTGACAGT
1621 ATTGTTGTCG CATGCTGTGT TTTTCGTACT TTAACGTTTC AATTTATGAA GTTAAGTTAT
1681 TAATTTATAA TGCTTATGTT TTCCAGCGT AGAATGTGCA TGAGTAGTCT ATAATTTTGT
1741 TAGTTTTCGT GGACCAAGGC CCTTTTTCGT CAATAAAAGT GCCCGCGGTC CAGTTTCAAT
1801 ATGGACGACG TTATTGAAGA ATATTCTGTC TCATTGCAAG ATTTAACCTT CAATTTCAAG
1861 CCACATATCA ACATGCTAAC CATCCTGGCC GAAGAAAACA AAGCCCATGC TGAGAGTGTC
1921 GTCAAAGTTA TAGAGGCCCA GTTGTATAAG GTTAATTGGT TATTTTAA

```

//

```

LOCUS       17             1761 bp       DNA           linear PLN 25-FEB-2004
ACCESSION   17
VERSION     GeneMark.hmm v3.0 self_training
ORGANISM    C.intestinalis
FEATURES    CHR      ---
            CDS      500..1261
            /translation="MGSWRSYLTSGILICISRPFWEALSTMMLLAEIEQSKRKLN
            IPTYLVYIDAAVLILCGTFMSFQASARRSASLIAATHLAVRTLQVHFHMKMSEVMI
            HILLRNVGVIASYLILLASGIGTTKAKHRSLMDLSVFAIGTLYAAIAGLLWSSKFEQT
            FVKRSLPQQVTRQVSLKLLYSFLEICLAICALLFATQRKGLQQAQKFFALIFWFLMVF
            PSDFLFSRMSDIETWSHLRLMASSFCTLGTIVVLNLFVN"

```

```

ORIGIN
1 ATCACGTATG TTGTAATCTA ACTTGTGTGC TTTACTGCTC ATGCATATCT GACGTA AAAAC
61 AGTGCTGCCA TACGAATTTT AATATCGTAT AAATCATGCT AAAAACGAAG AACACAAGGT
121 CTTATAACGC AATATTTATT TTCAAACAAT AAAATACATG CAATCGTATT ATTTATAAAA
181 GAAGCTGCAA AAATAGTATT TTAACAGAC ACAAAGACAG TTAATTTTTT GTAGTTGGCA
241 ACACGTAATA AAAAGTTCAA ATTGAACTTT GACCCCTACA ACATGCCGTT AGTATACAAA
301 CACTGTTTTG TAAACAATCT GATTTTGACC TTGTTATATC AAGGTTTTGT TTAATATGTT
361 TGCCAACATT GTGGAGTTGA CAGACAAATT AATTATCAAA ATTGTTACCC AAAGCAATTA
421 TAGAAATGTA ACTATATATA CATTTAACAT TTATTTATAA ATATAGGTTT TGTGCTAGTA
481 AATATTATAA ACACACAAAA TGGGAAGTTG GCGATCGTAT TTAACCTTCTG GCATATTAAT
541 TTGTATTTCA CGTTTTCCAT TTTGGGAAGC ATTATCAACG ATGATGTTGC TGGCTGAAAT

```

```

601 CGAGCAAAAA TCAAAGAGAA AATTAACAT TCCTACATAT TTGGTGTATA TTGATGCAGC
661 TGTTTTAATT CTTTGTGGAA CATTATGTC ATTTCAAGCA TCTGCACGAC GCTCTGCTTC
721 TTTGATTGCA GCAACTCACC TTGCAGTAAG GACATTGGTT CAGTTTCATT TCCACAAGAT
781 GAAATCTGAA GTTATGATT ATATCCTGTT GCGTAATGTT GGAGTCATTG CATCCTACTT
841 GCTGCTAGCA TCTGGTATCG GCACAACAAA AGCAAAACAC AGATCTCTGA TGGATTTGTC
901 TGTATTTGCT ATCGGTACAT TATATGCAGC AATAGCAGGG TTGCTGTGGT CGTCTAAATT
961 CGAGCAAAACA TTTGTAAAAA GATCTCTCCC TCAACAAGTA ACCCGGCAGG TCTCTCTAAA
1021 GCTTCTTTAC AGCTTCCTTG AAATATGTTT GGCAATATGT GCTCTGCTGT TTGCAACACA
1081 ACGCAAAGGG TTGCAGCAGG CAAAAAGTT TGCCCTAATT TTTTGGTTGT TTCTTATGGT
1141 TCCATCAGAC TTTCTCTTTT CACGAATGGA CAGTGATATT GAGACATGGT CACATTTAAG
1201 GCTAATGGCT TCTAGCTTCT GTACCTGGG GACAATTGTT GTATTA AATT TCGTCAACTA
1261 GCACTGACG ATTTTATTTA AATAATCAAG AAAAAAGTTG GTTCATTGCA AAAAAAGAA
1321 TATTATTTTG CAGCTGTGTG TTTGGTGCTC CAGATCTTTT AAAAGAAAAA TCGTATGCAA
1381 TGTAATCTTT AGTTGAAAAC TTTTATGTGT AGTATGTATG CAAATGTGAA GCAAAGTATT
1441 GATGCAACCG TTTTTATTCA AGGGCCTTCT GTAGAAATGT TATGGGTTCA ATTA AAAAGT
1501 TAAATTTGGA GGTATGTGGT AAGGTACAGG GTGTATTTTT TCGTAAACAT ACAAAGAAAA
1561 CTTGCGATAA ACATGGTGTG GCTGGCTGGG TCTTGAACAC AAAGGGTGGG ACTGTCCAAG
1621 GGTTTCTGGA AGGATCACAA CAGAGTGTAT CCAAAGTGTA AGCATCAGCT TGGATGTGTG
1681 TTTTGCTTGC CTTCATATTA TATTTAAACA TATTTAATAA AAAGTGTCTT ACTTTAATAA
1741 TATCTGCAAA TTTACGTGTT T

```

//

```

LOCUS          18      1860 bp      DNA      linear PLN 25-FEB-2004
ACCESSION     18
VERSION       GeneMark.hmm v3.0 self_training
ORGANISM      C.intestinalis
FEATURES
  CDS          500..1360
               /translation="MSNSSYKSLLRNLPRVNLQNLKANPYAEVKHSPNRPHPAIGLK
NGVRPNIKPRIGYVQDKTPFQKRIPKYGYNREQHLKRQYFPLTLWQLQRHVDLGRID
PTKPV DITAI SNGRVLSMVGSESNY YGIYLL EQGANIFKAKLDIEVQIVDELALATV
EKAGGTVSTAFYDRRSFVALCNPVEYFLMGKPIHKRLLPPQELVTYYTDPKVRGYLS
DPAKIWEERMKLAKKYGYDLPELSEEQKHLMVEGKKDPRQVFNGLMPGSIVNLADKT
VLVPENEHFKQHAAM"

```

ORIGIN

```

1 TTCCCGTCCA ACAAATTAGA CGATTTACGT AAATTGTCAT TTCTTGTTTA TGATTTCCGT
61 ACACGAGCAC GAAATACAGT CATGCAACAG TCTCCATTTA CGCTGCAACA TGCCGCAATC
121 ACCGGCGGGG AATAACCCTA TTAAACTCGG TTGACATCGG AGTTTTTCGG AAAGTAAAAC
181 AAATTTACAT AAATATGGAG CCATAAATAC TACAACGTGA TAAACAAATT AACAAATATT
241 TAAACAAATA TGATTTACTA TTTAAATAGT AGAGTAGTAT TTTGCTTACC GTGTGGATAA
301 ATATATATTT TTTATCACTT TGTGTAAAAA TGGTAACACT GTAATGGTGT AGATTTTGTC
361 AAAATTAGAA TAACCATGCG AGTTTAAAGA TTATGTTTTG AGTGCGGTGC GTGTTTCATA
421 GCGGTGTTGT TATCTGTTAG ATTTGTGTTT CAGGACGCTA TCTGCTTTAT AGGTACAACA
481 GCTTTGAACC AATGAGCAAA TGTCAAATTC ATCGTATAAA TCTTTGTTGC GTAATCTTCC
541 AAGGGTAAAT TTGCAAAATT TGAAAGCAA CCCTTACGCC GAAGTAAAAC ATTCTCCCAA
601 TCGCGGACCC CATGCAATAG GGCTTAAGAA TGGAGTACGA CCAAATATCA AACCAAGGAT
661 TGGGTACGTT CAAGATAAAA CGCCGTTTCA AAAAAAGATC CCTAAATACG GATACAACAG
721 AGAACAGCAT TTA AACGAC AGTACTTCCC ATTGACGTTG TGGCAATTGC AACGTCATGT
781 TGACCTTGGA AGAATTGACC CCACTAAGCC AGTGGATATC ACTGCTATTT CTAATGGCCG
841 AGTGTTAAGC ATGGTTGGTA GTGAGTCTAA TTATTATGGA ATATACTTAC TTGAGCAGGG
901 TGCCAATATT TTTAAAGCAA AACTTGATAT AGAAGTTCAA ATTGTAGATG AACTGGCTCT
961 TGCCACGGTT GAAAAAGCTG GTGGTACTGT TTCTACTGCA TTCTATGACC GCAGAAGCTT
1021 TGTGGCTCTG TGTAACCCTG TAGAGTATTT TCTTATGGGA AAACCAATCC ATAAAAGGCT
1081 GCTACCACCA CAGGAGTTGG TAACCTACTA TACAGATCCC AAAGTGAGAG GCTATTTGAG
1141 TGATCCAGCA AAAATATGGG AGGAAAGGAT GAAACTAGCT AAAAAATATG GATATGATTT
1201 GCCTGAACTT TCTGAGGAAC AGAAACATCT GATGGTTGAA GGAAAAAAG ATCCAAGACA

```

```

1261 AGTGTTC AAT GGGTTAATGC CGGGATCGAT TGTA AATTTG GCAGATAAAA CAGTTTTGGT
1321 GCCTGAAAAT GAACATTTCA AGCAACATGC AGCGATGTAG CAGTTACTAT TTTGTTTTAA
1381 ATTTTACATG TTGTGAAAAC TTGAAATCTG TTCGCATAAT TAATATTAGG TATGTTTCAA
1441 ACCGTGAACT ATTTTGTGTA AATATATATC CTTTTTTCAG AATAATTAGG ACAATATGAC
1501 TGAGGATGTG GTTAAAGTAA AGAAACGTAA ACATACAAAA GATGAAACTC AAGAGGAAGA
1561 GGAAGCTCAA AAGGAAGTAA AGGAAAAAAC AAAGAAAAAA AAGAAGTCAA AAAACAAGAT
1621 GCAAAAGACC GAAGAAAATG AAATTTTACC CGAAAAATCC ATTGAACCGA CCCCTGCAGC
1681 CAAGCCTGAA GAAGAAAAAA ATAAAGAAGA TAAGCCCAAG GAAGAAAATA CCGAAATTAT
1741 AAAGGAAACA AACAAAGAAA ATTCAGAGAC TGATGGAAAA AAGAAGAAGA AGCGAAAGAA
1801 GAAGAAACAG CTGCCTCCAC TTCCTAATCC AGATCCAGGA GCTTTTGAAG CCATGTTAAC
1861

```

//

```

LOCUS      19      3928 bp      DNA      linear PLN 25-FEB-2004
ACCESSION  19
VERSION    GeneMark.hmm v3.0 self_training
ORGANISM   C.intestinalis
FEATURES   CHR ---
           CDS
join(500..611,672..736,843..926,1234..1290,1355..1401,1572..1634,1693..1739,2095
..2176,2236..2278,2431..2512,2674..2761,3284..3428)
           /translation="MEDWLHCNACFVRIIHGPVSFSVTNCAHIFCNKCIERVANSTC
TVCNKKCSAYTLLHNKMDPTTANYFKDPGELAQKAMNMFKLSERVEDVRKFQATQRKSLF
KAIVNKAEQKEKLLQTAVATMSETKRKNSELKFIKKNLNLSSVSPKSHSYMAMQYS
PDCSPSSPNRNISTRKTPPHYSSVPCTPNKTSVDGHHQHRLLSGGYTVSPNKEKP
RMSLRSPVGGKIQTPPDLRLHHSPPDGIVSKQASLYDCSGINEPHRKTTRGSSIK
VMSRQLRIETAESSANTPELKKKICPVMKSHKD"

```

ORIGIN

```

1  GTAAACATAC ATGAGCCAGT CTGCAAAGTA TGGCAGTTCC TGACGAGATC TCGCGCGTGC
61  AAGACGGTTA TTTTTCGCGT TTGCGCGTGC TATCATTAAA AATCTGCGTG CAAAGCATGT
121 ACATTTTCAA GCCACGTTAG GAAATCTTAC TTAATTTAAT ACGTATTTTT TTCTTTGTTT
181 AATTAATTGG CGTGCGTAGG ACAAATTGTA GCGTGCATAA CCAAAAGTCT GTAAAAAAT
241 CGCGCGTGCA CCTGCCATAC TCTGCAGTCT GGTACATGAG TCAGTTTACC GTCGAAAGCC
301 CGCAGTTGCT TAATCTGTAA CTAACGTTTG GAAGGATTCT TCTCTAGTGG TGTTTATTCC
361 AGTGGTTAAG AATAGTCTTA GGTGGTATGG TAGCAATAAT GTACAGTGTA TAGGCAATTT
421 CTAGTCCTAC TGCTTACCCG ATAACTGAGT TTAAAGCATA TTGGATGAGA TTGTAAGGT
481 CATATAGAAG AGAACGAAAA TGGAAGATTG GTTGCACTGT AATGCTTGCT TTGTAAGGAT
541 TATCCATGGA CCAGTTTCTT TTTCTGTGAC AAAGTGTGCT CATATATTCT GCAACAAGTG
601 CATTGAAAGG GGTTAGTACT ATTTGCATAC TACATACCTT ATAGATGTGT TTTGTTTTAC
661 TTTCAATTGCA GTTGCCAAC CTACTTGTAC TGTGTGCAAC AAAAAGTGTT CAGCATAAC
721 CTTACTTCAT AACAAGGTAA AGGAAATATT TAAAACGTT TAGTGGCATC ATTTACTTTT
781 AACAAGTTTA CCTAACATAG CATGTTCAA AATCATTATA ATGTATATAA TTGTTACACC
841 AGATGGATCC CACCACAGCA AACTATTTCA AAGACCCAGG AGAACTTGCC CAAAAGCCA
901 TGAATATGTT CAAACTATCC GAAGATGTGG GTTTTTAACT TTACAGTATA ATATATTTAC
961 TTTACCTCTG GCCTCTGTCT CTTTATTTTG TTGTATATGG ATGAGTTTCT AACGACAGGG
1021 TTCAGACAAG AGTTGGTTCG TTAAGTCAAG AACCTTCCAT TCTATAAGAA AAAATAAGTT
1081 ATATATATTA TAACTTGCT GTTAACATGT TGAATTTGGT TATGCAATGT ATGTAAACTT
1141 CAGTTAAGTG CAGTTTAAAG TATGAATATA AAAGTCTGT GGCCTATACT ATACTTTTAT
1201 ACTAACCGAA TAATTTTACA TATTTTAAA CAGGTTGCAA AATTCCAAGC TACCCAAAGG
1261 AAATCTTTAT TCAAAGCGAT TGTTAACAAG GTAATGTATG TAAAATTTT GATATATTGA
1321 TAAAAGGCAA ACTGACACAT CTGCTTATTA TCAGGCCGAA CAAAAGAGA AGTTACTGCA
1381 GACAGCAGTT GCAACAATGT CGTAAGTATT AGGGAATAA ACCGCAGTTT TTTGCAAAG
1441 AAAATTGATT TGTTTACAG CTTGTGACAA AAATAAAACA CCCAGTAGTC TAACTTTGC
1501 AGGAGTTTTT GAAATACTAA GGAACTTTT AGTTTATTTG CAATGCAAAA ATATCAATTA
1561 TTTTCTTTTA GAGAAACCAA AAGAAAGAAT TCAGAGTTAA AGTTTATCAT CAAGAATAAA
1621 AACAACCTAT CAAGGTAATA TCTGTGAATT TAATCTACAA TACATTAACA TAGAGTTTCT

```

```

1681 TACATATTTT AGTGTCTCAC CAAAAAGTCA CTCTTATATG GCTATGCAAT ATTCACCAGG
1741 TTAGTAATGT ATTCACHTTAT TTGGTCCTGC ATCAATTGAC AATTTTATTTA TTCCTGCGTG
1801 GCAGGGCAAG AACAGTTGTT AGAATACGAC TGTTCGTGTTT TATAAACCTC ATGTCCAATT
1861 ACCATGTATC TATGTAACHTT TGTGGATGAT TTTTTCGTAA ATAATTTTCC AACAGCTTAT
1921 CCGGAATGAA AAAACAGTGT ATTCCCGACA TTTCGTCTGC CATTTCGGCAA GACTTTAGTA
1981 GGAAATGTGT TTTTTTTTATT GTTTTTTTTT TAATCTAATG TAATAAGAAA CCTAGTCAAAA
2041 AGGTCTATAA AATGGGTGTT ATGGATTTGT TTTAACATTT ACTGTTTCTT ACAGATTGTT
2101 CTCCCCCTTC ATCTCCCAAT AGAAACATAT CCACTCGTAA AACACCACCA CATTACTACA
2161 GCAGTGTACC ATGCACGTAT GTACTCATAT TCCATGTTCA ATATATACAG GTTACTTTTAT
2221 CTCCGTAATT TTCAGGCCAA ACAAACHTTC TGTAGATGGC CACCAGCACA GAACGCTTGT
2281 AAGTTATTTG TATTAACHTT TATAACHTTT TTTACATAA TCTGCTCGCT TTAGGATAG
2341 CAGCAGAATG TTATTGGACA TACACTTTAT AACACTATCT ACGTTTATTA ATCTGTTACC
2401 ATAATCACAC TAACACTTCA AAATGTTTAG CTTTCTGGTG GTTATACAGT GTCACCTAAT
2461 AAGGAAAAGC CAAGAATGTC TCTTCGTTCT CCACCTGTTG GTGGAAAAAT ACGTAAGATT
2521 ATAAACTATG CTTTTAGTAG TCATACTTTT GCTTGGTTTT ACCCTTAGCG TATTTTAAAG
2581 ACTGTCATTT TTAHTTTCTAA TTCCATTTTC TTTGTTATTT CTACAAGATA AATGAAAGTT
2641 GTATTTTATC TTATAATGAA ACCTGTATTC TAGAAACACC TCCAGATTTA CGTCTACACC
2701 ACAGCTCACC AGATGGAATA GTTTCAAAGC AGGCCAGCTT GTATGATTGT TCTGGAATAA
2761 AGTTGGTTGT TTTTAACTAA CTCAATGTT TTTACAGACA TTCAATGAAA CAAAGCACTT
2821 ACTTCTCAA GTTCCAAACG CCTAGTAAGT TTTTCTGTTA TTTTCCACTC ACAAGAAATA
2881 TCTATHTCT ATATATGGAT AAGACTCCCA GCAAGGCATA ATATGCAATT GAAGCTGTGT
2941 GACHTTGGGC AAAATAATAC TTTAGCCAAA ACCCTGTAGT TCCGAACTGA TTATTTTAAAG
3001 CGTCAGCCAT TAATTATATA AAAAATGTAA CAAAGGGTAT GAAGCAGAAC ACCCATGTTG
3061 TAACGACTTT AGTTTCCCGC CAAGCGAGGA TAAACAAGGA ACATCATTTT TAACGAGATA
3121 CTTTTTTCTT GTAGAATCTC CCATGCATGG AACCCCCCA CATAGTACAC ACAGCACTCC
3181 ACAGTCGAGG TGAGGGTTTA TTAHTAAAAT AAATTTGCCA AACAGATAAA ATACATHTGC
3241 AGATGTGGAA CTCCCAGAGT GAAAGCCATT ACTAACTATG GAGTGAGCCT CATCGAAAAA
3301 CGAAGACTCG TGGGTCATCA ATAAAAGTTA TGAGTCGTCA ATTAAGAATA GAAACTGCCG
3361 AATCATCCGC AAACACTCCA GAGTCATHTA AGAAAATTTG CCCAGTCATG AAGAGCCATA
3421 AAGATHTGAT ATGTAACAAT AAAACATHTC ATTTACATHT TGATHTCAAAA ACCTAATHTC
3481 GAGGTGTTTT TCGHTGCGAA ACCAAGCGHT GTCGCAGGHT TCTTAHTTCA TCCATHTAGGT
3541 GTCGCTCTTC AGTCCTTAAG TTTCCCTGC CACGGTCGAG TGACCCTGCG TGAACATAT
3601 TTATCGCTTG TTGTTTTAAA AGTTAATHTA ATGHTTGCCG TCTTACATHT AACTGAGTCC
3661 TCTATATCTG ATACATCGHT CAAACACATC THTGHTGCTCA CAGCAGTCAT ACGATCTHTC
3721 GCAGCGCTAC GATCTATAAG ACAGATATAT TAATATHTTAC ATAGCAATAT GGGAAGAACA
3781 TTAATGCTAT TATGGTATAA TGAGAAGAGC ATHTGHTAACA TGCCATHTGT AAAAATHTGAT
3841 AAACGATAAT TAATAAACAG CHTGAAATTC ATGACATACA TTTAATHTGAC AATHTTTTTTA
3901 CTGAATHTA AAATATHTTAG THTTTACT

```

//

```

LOCUS      20      2180 bp      DNA      linear PLN 25-FEB-2004
ACCESSION 20
VERSION    GeneMark.hmm v3.0 self_training
ORGANISM   C.intestinalis
FEATURES   CHR      ---
           CDS      join(500..586,655..758,912..1680)
           /translation="MIRLLYVVCCFLILQTSKASEGDRCVQYQGCLQPCQHCKDGI
           FDKNQTRYMLLLGWDCREECKYTCMWKTV EAYEAAANVRVPQFHGKWPVRIIGVQEP
           ASVLF SILNGISNIWAYKQYYS AVSSNAPLYTTTTIHAILAANAWLWSSVFHARDFP
           WTEKLDYFCATSLVLYSFYLSIHRLSYELHGHNVHILRWIAGNLIGAFYLGHISYLT
           FQSFYDGYNMKANVAVGLMNSITWLSLCFRKRKKHLHVKKMAAAIIMTNLFLMFELS
           DFPPVWWTFDAHSIWHFLTIPMPLLVYSFLKDESLKLQKEYETKQKFP"
ORIGIN
1  AGGGAAAGGA GGACGGGAGA CATCAAAAAT CAATGGGGCT TCAGGACCAG GCATTGCGTG
61 CGCCATTGTA GCACGGTCTG CTGGATTGTT TCAAAAATAAC AAACAGACTT GTGCTTGTGA
121 TGGAGTATCT GTGTGGGACG AAAGGAATGT ACCTTTAGCA GGTGCAGAGA GAAGCAAGCA

```

```

181 TAAACAGAAA TTGTAGTTTA TTGTTTTAAA TTTAATTCCT CATCATTGTG AAATGTTTCT
241 TTGATTAGTG TTGTACATCC GCAAAGACCC CAACAGTTTA ATAATACCTG AGCTTAATTA
301 GCATCCTTGG CACTTAGCAA TGCATATAGG CAGTGGTACA GCTCAACCTT TCTGTTTACC
361 AAAATTTGTC AATCTATTAT ATCGCTTATC GTTTCTATTT GTTCTTTTTA AAGTTGGCTG
421 TGCCACTGCA TTTTLAGGGG TGTTCTTTTG TAAAATCATG TTGTTTCATT TAAAGGTAAT
481 ATATATATAT ATGTATGCAA TGATACGACT ATTGTATGTA GTTTGCTGCT TTTTGATTTT
541 ACAAACCTCA AAGGCATCAG AAGGTGATAG ATGCGTACAG TACCAGGTTA GCTGATAATT
601 TAATTTAAAT GGGGATGAAA TGGAAGTTTT TGATTATAAT GTATCTGTAT TTAGGGATGC
661 TTACAACCAT GCCAGCATCA ATGCAAAGAT GGAATCTTTG ATAAGAACCA AACCAGATAC
721 ATGTTGTTGT TGGGATGGGA TTGCAGAGAG GAATGCAAGT TAGTGTTGAT TCATAATATG
781 GTTGAATAAA CTTGTATTAT AGTGATATTT GGATCCTGAC TTTTAAACAA ATTTCTTTTC
841 TGAATTTATG CCTGAATGTA TCTGATGATT AAAATAGCTT TGATATTTTT TAACAAAAAG
901 TAATTCCTCA GATACACTTG CATGTGGAAG ACTGTAGAAG CTTATGAAGC TGCAAATGTC
961 AGAGTTCCAC AGTTTCATGG TAAATGGCCA TTTGTAAGAA TAATTGGTGT CCAGGAACCG
1021 GCGTCTGTTT TGTTTTCTAT ACTGAATGGA ATATCCAACA TATGGGCTTA CAAACAATAT
1081 TATTCAGCTG TTTTATCCAA TGCACCATTG TACACAACCA CCACAATCCA TGCAATACTT
1141 GCTGCAAATG CATGGCTATG GTCCAGTGTT TTTTATGCAA GAGATTTTCC ATGGACTGAA
1201 AAGTTAGATT ACTTTTGTGC TACATCTTTG GTTTTATACT CATTCTATCT TTCTATTCAT
1261 CGCTTATCAT ATGAGCTTCA TGGACACAAT GTGCATATTT TAAGGTGGAT AGCTGGAAAT
1321 TTGATTGGTG CCTTTTACCT TGGCCACATA TCTTACTTAA CCTTTCAAAG TTTTGATTAC
1381 GGTTACAACA TGAAAGCAAA TGTAGCAGTT GGTCTCATGA ACTCAATTAC TTGGTTAAGT
1441 CTCTGCTTTC GAAAAAGAAA AAAACACCTA CATGTTAAAA AGATGGCAGC TGCAATAATA
1501 ATGACCAATC TATTTCTGAT GTTTGAGCTT TCCGATTTCC CACCAGTATG GTGGACATTC
1561 GATGCACATT CTATATGGCA CTTCTTAACT ATTCCAATGC CATTGCTTGT GTATTCATTT
1621 TTAAAGGATG AAAGTTTAAA ATTGCAAAAA GAGTATGAAA CAAAACAAAA GTTTCCATGA
1681 CCTACCTTTT TTACATTTTT ACAAACTG TAGTACTGTA CTTGCTATAA TTATGCAGAT
1741 TTTTATAAAC AAATATATTT TATTCAAGTT TTATTGTTAC CATAACCAAT GCAAATAAAC
1801 ATCAGTCTGC TGTGAGCAAT CTAATAAGT GCTGTGCAA ACAAACACCA AACACGCAA
1861 AAAAAATAT CAATTTACCC TATACTGTTA CAATAAACT GGTTTTGAAT CATCTTCACT
1921 TATAATATTC AATATTCTGC CACCTATCAA ATTGAACTCA ACAAATTTTA GGTAAATGAA
1981 AAATGTTTAC TTACTACTATT TTGCCACCAA ACTTAAACAA ATATTAGGTA AATTACGTCA
2041 CTCAATCTTG GTAATGCAAA ACAAACAGT CAGTCTCTAG TTTTACAGAA AAAATCTTAT
2101 ATGACCACCA TCTACTCTC CGTAATCACC ACCTAATACT GCATACCATA ACCATTTACA
2161 CTTAACTATA CAGAGAGTTG

```

//

LOCUS 21 2779 bp DNA linear PLN 25-FEB-2004

ACCESSION 21

VERSION GeneMark.hmm v3.0 self\_training

ORGANISM C.intestinalis

FEATURES CHR ---

CDS

complement(join(500..747,1012..1395,1470..1649,1831..1989,2177..2279))

```

/translation="MKCLMILALAVLATNAMENHRQLSAVFEGSEQACSDTCDDVSV
WCGHDMKAFNCNHTNYVGIIVREKCALSCGTCLPCPNVEPRSCGEEVDTCQDNTNKF
ATYLAPAYCNNHLLSFLVQRVCKRSCGKCPVNNCARSSVSNQIPCTEEFCHKKRLFS
KKLVFEKVFLLIDCADMDAECQYWAEEMNYCSPASLYKTMETRCRKSCKKCVKCGES
ELIAPPEAVEGLLVAPARPLTEATTELPTTSEIPDTTTEPPTTVEAVTAAIEVFTEV
PRGAVGCDIQCRNGSCSGQAENSICVCDKSAPGVLSRPCGGQCEANCARPDDFIGQW
EVFCTGEIVCTCHPTGDVEAGIPGGALCR"

```

ORIGIN

```

1 GTTATACGCG GAACAGGGAG TACTTATTGC ATAACGGTGA ATATACTATC GAACGTACGA
61 CTTCTGCAGG CATAAGACCT ACATCGAATA TAACACGTAG TCTTTACTTC ATTGTGGCCA
121 ATACAAATGG AAATGACCGT AAATTCCTC ACCACAGTTT GCGTATTCTA TATCATTAAC
181 ACTGTTCTAC TGTTTATCTT GGACTACAAA TAAACAATAG GTAAATGCTG TTTAAAACAC
241 GATCAAGATA TTTTGATATT ATGAGCTAAA GGTGCCCCAT ATTCCCCCAC TCTACTATAT

```



301 ATTTTTGGAA ATATTAGGCA ATATGTGCTT AGGTGTCCCA CGATGTTGAT AGAACACCAT  
361 ATTGTATATT TGAAATTCTT TTATTAATAA CGAACTGCTA TCGGTATAAT AAAAAAACGA  
421 ATCCTTTTAA TAAATACACT ATATCACGTA AAAAAATTCG TTGCACAATA TCGAGCAAAT  
481 GATACATAGT TTGCAAAAAT TATCTGCACA ACGCTCCTCC TGGTATCCCG GCTTCAACAT  
541 CGCCTGTCGG GTGGCAAGTG CACACAATTT CTCCGGTACA AAACACTTCC CACTGCCCGA  
601 TGAAGTCGTC GGGTCTTGCA CAATTGGCTT CGCACTGACC TCCGCACCTT GGTGATAAGA  
661 CTCCAGGAGC TGAATTGTCA CAGACGCAA TCGAGTTCTC TGCCTGCCCT GAGCATGATC  
721 CGTTGCGACA TTGGATGTCA CAGCCGACTG TTGAAAATCA AAGACGTATA AGAAAAATA  
781 TTGTAAATAT AGGTATTGGA CATAAAAAGG TGCAGAAGGC TTGTCATTTT TTGCCCTTTT  
841 TACAACTAC AACAGTAAAG TTGCATTCAT TGCATTTTAC TCCCAACGTA TGTGTAATTA  
901 GTTTATTTAC ACTATTTGTA ACTGTACGTA TATAGATTGT TCCCCTTGAA GTAAGATTG  
961 CTTTTAAAT TAAAAATCGG ACGTGTTTAG TGACAAAAAT TCTTTGCTTA CCTGCACCTC  
1021 TTGGAACCTC AGTAAAAACC TCAATCGCAG CGGTTACTGC TTCAACTGTT GTTGGGGGCT  
1081 CAGTGGTTGT GTCTGGTATT TCACTTGTAG TTGGCAACTC AGTAGTTGCT TCAGTCAAAG  
1141 GTCGAGCTGG TGCTACCAA AGTCCCTCTA CCGCCTCAGG TGGTGCATA AGTTCACCTT  
1201 CTCCACATTT TACGCACTTC TTGCAACTTT TTCTGCACCT TGTTTCCATC CATGTTTTAT  
1261 AAAGAGAAGC TGGACTGCAG TAGTTCATCT CTTCCGCCCA ATATTGACAC TCGGCGTCCA  
1321 TGTCTGCACA ATCTATGAGA AATACTTTTT CAAAAACAAG CTTTTTCGAA AACAATCGTT  
1381 TCTTATGACA AAATTCTAGA ATTAACTAA AGTGTATATG TTTACGGGAC GCTTTTTATT  
1441 GTTTAGTTCT ATTTTTAATA TTCACGTACC TTCAGTGCAT GGTATTTGGT TGGATACGGA  
1501 CGACCTTGCG CAGTTATTAA CCGGACATTT TCCACATGAC CTCTTGCAA CTCTTTGCAC  
1561 GAGGAATGAC AACAGATGGT TGTTGCAGTA GGCAGGGGCG AGATACGTTG CACAGAATTT  
1621 ATTCGTGTCT TGACAGGTGT CTACTTCTTC TATATTCAA TAAATCTTGA TTAATGTCA  
1681 CTACTAAGAT CGTTATGTTA AATTAGTAGT AACAGTTAGC GCATACACGT CACCAGCTAT  
1741 ATTTAAAATC AGCACAGCAA ATAGATTGTA TCTCGAATGC AAAACAGTCT ACATAAAGT  
1801 AAATGCAACT CAAGCTTATG CCATAATTAC CTCCGCATGA TCTAGGTTCA ACATTAGGAC  
1861 AAAGTCGACA GGTACCGCAT GATAAGGCAC ATTTCTCACG TACGATAATC CCGACGTAAT  
1921 TTGTGTGGTT GCAAAAACGTT TTCATTCTGT CGTGGCCACA CCATACAGAA ACATCGTAC  
1981 ATGTATACC TGAAAAATAC ATGTTGTTAA AATTAACAGT TCATCGTGTA CGTAATCGTG  
2041 CGTATTAGCC ATTCGGGTAC AGTTAAACGA ATACCGTGTT ATCGCTAGTA ACCTCATGAC  
2101 GTCAATGATC ACATACGAAC CTATTGTGAT ATATCATAAA CCATAACTTA TTCACTGTTT  
2161 AGTCAGTATA ACTTACTGCA AGCTTGTCTT GAGCCTTCAA ACACCGCTGA TAGTTGTCGA  
2221 TGGTTTTCCA TTGCATTGGT TGCGAGGACA GCTAAGGCGA GAATCATTAA ACACTTCATC  
2281 TTCTATTTG TTTGTACTTG TTGCTTCTTT AAATTCCGTG ATGTCTTTCT GCTCTTCTTT  
2341 ATATATCTTC TTGTTGTGTT TGAATTGTGG ATGCCTTGAC TATGGATCTC ATCTTTATAT  
2401 ATACTGTTAT TGTGTCCAAA CCTTTTTCTT CATATTTCCA TGAAGTATTG TTTATTAGAA  
2461 CACTATACAC ATGGCAGTAA TAATCACTGG GTAGGAGTTG TATATAATTG TCAAATAACG  
2521 CACGATATAA ATTCGTTGTA CACATAGTGA GCTGTATGAA TAATTACAAG GAACGCAATC  
2581 TCGCTGAATG GGGGAACGGT ATACACATAA TGATGGAGTA TTAGAATCTA TTAGACGTTA  
2641 ACGACTTGAT AATTACACGT TGAACAGACT CACAAACGGT ACGTTCGTAT AAAGTTTGTT  
2701 TAGTCGCTAT TTACACGGAA GTTTAACGTA CCACATATAC GTAGGTTGAT TTGTTAAACG  
2761 TCACCAACGT AATTCCAAT

//

LOCUS 22 6045 bp DNA linear PLN 25-FEB-2004  
ACCESSION 22  
VERSION GeneMark.hmm v3.0 self\_training  
ORGANISM C.intestinalis  
FEATURES CHR ---  
CDS  
join(500..670,1044..1210,1843..1978,2203..2375,2589..2733,3144..3211,4737..4844,  
4908..5015,5428..5545)  
/translation="MAETMLHPRPGMATILKSDNNAGGNYVEQIEFNRLRQTKFPT  
IRGPEGNYDYPFSQGRLEKSKSFIKWNKHSQAPHQGYPLTPHRDGHLDALDPTSGYLG  
AGTDIDLKTNIKKISSMNQLSDKIQLGTPTSKPPASGRPQTPPRAVAPEHGGKWSN  
QVSDVSLRAKLGWTSNNAVKPKNINDSGNLVVGTFTFKPGNWRDEAAKYYMFSST

QTSNRMVDWDKRLPPKLLPCPSTLEKTPDPISQNMNIWPKRFESDPEFWQTIGRSWD  
WFQFRNKNHGNRPYSYGCVGAYNFEDKDHPEEYRPLTSLRTPKPRYTDTAHRPNIP  
HYKGCVHWTATHSANNTFPAPQPPSTAHSRKLPTSPNTSIHSKKGPLSRMVTTPP  
KNPFNQVEDQQD"

ORIGIN

|      |             |             |             |             |             |             |
|------|-------------|-------------|-------------|-------------|-------------|-------------|
| 1    | TTTCGCAATC  | ATGTGTGATT  | GTAAAAAAGC  | CTAAAGTACA  | ATCATGAAAT  | TCAGAGCTGC  |
| 61   | GCAGTACTTT  | CTATTGCAAA  | AGTTCGTTAC  | TTATGCACAA  | TTACCAAAGA  | GACTCTAATT  |
| 121  | TCGCAAAAAAT | AATCTGGCAA  | CACTGAAGTG  | GATTTCAGGCT | TTTCACAGCA  | GTCAGGGTTT  |
| 181  | TAGACATATG  | CAGATGCCCA  | TGTGTAACAT  | AGATAATAGA  | TATCATACAT  | AGTAAATAGT  |
| 241  | ATCATGCTAT  | TACTATGGTG  | GTAATCTGGT  | ACCATTAATA  | ATTCCTAAGA  | CAGGCAATTG  |
| 301  | TTGTGACATT  | TTACACACATT | CAACTTAATT  | TCTGAACCAC  | TTAATTTTTT  | TCCAAAGAAA  |
| 361  | TTCTAAAGCG  | GGTACAGATT  | TTGTTGTCCA  | ACCTCAAATT  | TTACATTTAA  | AATGAAATTT  |
| 421  | TGGTTGCATC  | ACGACATTGT  | TCAATCCTAT  | TTATTTTTCT  | CCCAATCTCA  | ATTCTCAAGT  |
| 481  | TTAGGATTAT  | CCTTTAACAA  | TGGCTGAAAC  | GATGCTTCAC  | CCACGGCCTG  | GAATGGCAAC  |
| 541  | AATATTAATA  | AGTGATAATA  | ATGCTGGTGG  | TAECTATGTT  | GAACAAATTG  | AATTTAATCG  |
| 601  | GTCGCTAAGA  | CAAACAAAAT  | TTCCAACAAT  | TCGGGGACCA  | GAAGGGAATT  | ATGATTATCC  |
| 661  | AAGTTTTTCAG | GTAATACATC  | TTAATGGAAT  | CATGATATGA  | ACTTTACTGT  | ATTTCGTTGA  |
| 721  | TAATCAAAAAT | TTATCTGGCT  | CACATAATGT  | TAATATTTTG  | TAGCAGAAAAT | GAAATTCAAA  |
| 781  | AAGCATGAAT  | GTGTATATTT  | ATCAGATAAA  | TATGTTATAA  | CAATCGTACT  | TTGTTTTAAT  |
| 841  | TAAAACATAG  | TAATATGCAT  | TTTAGTGCCT  | AGCGGCTTAT  | GCATAATAAT  | CTTAAACTTG  |
| 901  | TTTAGTTCGG  | TAGCACCAGA  | TGTTTACCCT  | ATTTTTTTTAC | ACAAAAAACG  | TTCAACTCTA  |
| 961  | TGAGCATCAG  | ATCATGGTCA  | GATTTGCAGA  | ATTTATTACA  | GTCACTTTGT  | TAAGTTCCTG  |
| 1021 | ACATGTATGT  | TGTTGTTGTA  | CAGGGCAGAT  | TGAAAGAAAAG | CAAAAGTTTT  | ATTAAATGGA  |
| 1081 | ATAAGCATT   | ACAAGCTCCA  | CACCAAGGGT  | ACCCTCTTAC  | CCCTCACAGA  | GATGGTCATG  |
| 1141 | ATGCTCTGGA  | CCCAACATCG  | GGATATCTTG  | GTGCTGGAAC  | AGACATTGAT  | TTAAAAACAA  |
| 1201 | ATATTAATAA  | GTCAGTTAAT  | GAAGTAATAA  | CAGTTATAAC  | ACATGTGTTG  | TAATGCACAT  |
| 1261 | TACACAAATA  | CTAATATTTA  | AAATGTTGTT  | AATTATTTTG  | CCCAAAATGC  | ATACTCCCAA  |
| 1321 | AATGGTAGCC  | ATGACAAGCC  | TTGAACATCA  | AACCGCGTCT  | TACTATTATA  | ATAGAAAAAT  |
| 1381 | AAAAAAGGTC  | TTTGAATAAA  | AATCGTGCGC  | TCAAGTGAGC  | AAGATCCATG  | CTAGTCTGTC  |
| 1441 | AAATATGGT   | GACAAGTGAA  | AACAGTAACG  | TTTTAAATGG  | AAAAATGAAA  | AGTATAGATT  |
| 1501 | CTACTCTGTA  | AAGACTATTT  | GTACACCAAT  | CATCAAAAGT  | TGACTTGAGT  | TTTTCTTTAT  |
| 1561 | TATTCCTGTT  | TTGGATTGTA  | CAAAATTTAC  | TATGAGAATT  | TGAATCTTCA  | TTTGTCTCAA  |
| 1621 | ATTCGCCTTC  | AGTGGTAAAC  | AAAAATTTGG  | GCACGTCTGT  | GGTGTAAATTG | TTTGTTTTAT  |
| 1681 | GTCCAACAGT  | TATTCTCATT  | TTATGCGATG  | ACATTTTCCA  | CATACCAACA  | CAGGTAAAGA  |
| 1741 | GCTTTCTCT   | CTTGTTAGTT  | TTACTCTTAT  | GTTCCATCTT  | TATTATTCTT  | AAAAATATTC  |
| 1801 | CGCACACCAG  | ACTAAGTAAT  | TGTACCATTG  | CATATTGTTC  | AGAATCTCGA  | GTATGAACCA  |
| 1861 | ATTAAGTGAT  | AAGATTCAAC  | TTGGAACACC  | AACCAGCAAA  | CCTCCCGCGA  | GTGGAAGACC  |
| 1921 | TCAAACCTCA  | CCTCGTGCTG  | TTGCACCAGA  | ACATGGGGGA  | AAATGGGCAA  | GTAATCAGGT  |
| 1981 | AACCAATCAA  | AAGATAAAGT  | TGAGTATTTT  | TCTAATTGGA  | ATTGTGTAAA  | TGGCATCATT  |
| 2041 | AACTGTTTCT  | AAACGATTTT  | ATTTGTTGCA  | AAATGTTTTG  | GTTTGCTTAT  | CTCTATTATC  |
| 2101 | TAGTAACTTA  | TATCAAGAAT  | ATTGCACTAA  | CCACATTAAG  | AGTAGCTTTG  | ATGCTGTTAT  |
| 2161 | GAGTTTTTCAA | GATCAAATTT  | ATAATCCATT  | GTTGAAACAA  | AGGTGAGTGA  | TGTAAGTCTT  |
| 2221 | CGTGCGAAGT  | TGGGTGGCTG  | GACGAGTAAC  | AATGCAGTAA  | AGCCAAAAAA  | TATTAATGAT  |
| 2281 | TCGGGAAATC  | TTGTGGTTGG  | AACTTTTACC  | TTCAAACCTG  | GAAATTGGAG  | AGATGAGGCG  |
| 2341 | GCAAAATATT  | ATATGTTTCA  | CAGCAGTACA  | CAAACGTAAT  | GTGTGTGTTT  | ATAATATAAT  |
| 2401 | TATTTGAAAA  | TTATTGTAAT  | GTTAGAAAAA  | AGTCAAACAA  | ATATACTGGA  | TTTTCCCACT  |
| 2461 | GGCAAAGCCA  | AGGAGTGCTT  | GGGTTTGTGA  | TCAAAATTGC  | TCCCATTATA  | AATTAATAAT  |
| 2521 | GCAGTTGCAA  | TACTATTTTT  | TGTTTCAGGA  | GAGTTTAGTT  | GAAGTTTAAT  | ACTTGTTTTA  |
| 2581 | ATACTTAGGA  | GTAACAGAAT  | GGTAGATTGG  | GACAAAAGGT  | TGCCGCCCAA  | ATTGCTTCCA  |
| 2641 | TGTCCAAGTA  | CCCTTGAGAA  | GACACCAGAT  | CCGATCTCCC  | AAAATATGAA  | CATTTGGCCA  |
| 2701 | AAAAGATTTG  | AAAGTGACCC  | TGAATTCTGG  | CAGGTTTCGAT | TATCATAGAA  | TGTGTTAAAC  |
| 2761 | ATGTAAATTT  | GTTTGGTGTA  | CGATTGTACA  | AATAAGGTCG  | CTTTCATTAT  | TTGTCCCTGT  |
| 2821 | TAAAAATAGA  | AACTCATAAC  | GGTCAAAAACA | GAGTTACAAA  | CAAAATATTT  | GATTTTTGTG  |
| 2881 | TTTTTGTTC   | AGAGTACATG  | TGTGGGAACA  | TTGCAATTAT  | TGTTACCAAA  | ATACACTCAG  |
| 2941 | AATCTTATTT  | GGGATATTTT  | TTGATTAGAG  | AATGGTTTAT  | TATATACTAT  | TGGTTTTATTA |
| 3001 | TATACTATTA  | TGCTTACATA  | TGTCTTATAT  | GGTTTGATAT  | CAAGTGTAAT  | AGGTTTTTAT  |
| 3061 | ACCTATTCT   | GACAATGTAT  | CTTTCATGA   | CACATAAAAC  | AAAAAAGGTT  | TGTTCCCCAA  |

3121 AATTACTTTC TTATGTATTG CAGACAATTG GAAGGTCATG GGATTGGTTT CAGTTTCGAA  
3181 ATAAGAACCA TGGAAACCGA CCATACAGCT AGTAAGTGTT GGTGGAATAA TTATAAATTT  
3241 TTAAGGATTA TGTTGTTATT TTTGCAGCAC AAGTCATTAC AGGAAGAGTG GACACATTCC  
3301 TTGTTATGGG TAACTATGTT TCACGCAATG CTTTGTAGTT TAAATTTAAG TTGATTTAAT  
3361 TAGGTCAGTT TTTATCTTTT TATAATTTAA CTGATAAAAC AGTTGGTTAT TATTACAGTG  
3421 TATGCAAAAC AGTTTTAGTT TCTTAAAGCA GTTATTACAT AATAAATGCC TGGAAAGAGAT  
3481 TTTATGCAAA TATTTCCGAG GTTCTAATTT GTTTGAATTC TGATTTTGCA AATTTTTAGG  
3541 GCAGAGTAAT TATTCTGTTA AAAGAAATAA AAATTTGTGT AAGTTTGACA TAGAGAGTAT  
3601 ATAAACAAGT GGTGAGAAAAG CTATAATTTA ACAAGAGAGC CTAGCTCTAA TGATTAATG  
3661 AATGTAATGA ATAAATGTAA TCAATAAATG TAACCTACTT TATCCTCGGT GGCCGGTAAA  
3721 CGGCAGTCGT TATAACACGG GTTTAACACC TTGGCCAGCT AACGAGTTAC CATGTATGTT  
3781 ACTTTGTGGG TGATAATTTT TTTGGATTTT TTTTATGTAT GACAGTATGA CTGATAATTT  
3841 GGACAACCCA TTAGTGACCA CTGGGTTGGA GCAATTGCCG TTAAGTGTTT TGCCCAAGGA  
3901 CACATGCGCT CACAATGGTA GCAGCGATGG GCCTTGAACC CATTACCTCT GGGTTACAGG  
3961 CAGGCGTGTT AACAACTATG CCATGGCGCC GGATTGAGCA CTCGTTATAA TGTTAAACAAC  
4021 TATGCCATGG CGCCGGATTG AGCACTCGTT ATAATTTTTT CACTCCTT AATTTCCAGA  
4081 CATGCAGAGA GGTATAAGCT ATGCTTCAAC AGATGGTAGA AGGGGAAATG ATGACTTAAT  
4141 CGGTAAAGCC TTAAACGATA AGCCATTGGG AACAGATTAT AATGTCCTGA GTTTCGATACT  
4201 TGCCCAACAA AACAAAAACT TTGTATTTAT TTTCTTTCAA TAACAAATGG AAAGTTATTA  
4261 TTCTCAAAGC CAAACACAGC TAAACGATAC CAATTACTTA GTTACTAACA GGTTCCTAAA  
4321 ACATTAATTT TACTTTGCT TGCAAGCATT ATATTCATTA ATTCCTCATT AATTAGGTGT  
4381 ACACTATGGT TTATAACTAT GCTCAGTTAG AAATAGTGTA TCAAGTGCAA TCCATTGACT  
4441 GGGTTCAAGG TACATTTTGG ATTTTGCCTT TTTAACCAAA CAGAAAATGA ATCGTTAATT  
4501 ACTTGCTAAT TATGGGGTTG CATATCTGAA CACTTGTTTT AAAATTATTG AATTTATATT  
4561 TTGATTTAAT TTTAGTCAAG AGTTTTAAAA ATAAAACCTA GATTTAAGCA TTGAAATATA  
4621 TGAGAAAAAG CCTATAGGAT CACTTACATG TTAAAAAAAG GGTATTTTTA AATTTAATAA  
4681 AAATCTTTGC TCTTTTATTT ACAATTACCT TATTGTTATT TTGTGTATTG TTTTAGCGGT  
4741 TGCCTTGGAG CTTACAACCT TGAAGATAAG GACCATCCAC ATGAGGAATA TCGTCCACTT  
4801 ACAAGTTTTA GAACCTCCAA ACCAAGATAC ACTGACACAG CACAGTAGGT TTTTGCCATA  
4861 GCATGTTTTAT GATGTGACAA TGCAATTACC ATATTTTTTG TATACAGCCG TCCCAATATA  
4921 CCCCCTACA AAGGATGTGT GCATTGGACA GCAACACATA GTGCTAACAA CACTTTCCCG  
4981 GCACCACAAC CTCCTTCTAC AGCTCATTCA CACAGGTCAC TTTGCATTAA TGTTTTTATT  
5041 CTTAATACTA TGGCTGCATT TCCAGAAACA ATTTAGAAA AGTTAATTAT TATTAACAAC  
5101 TTTGTATTG TGACATCACA TATAGCAGTG ACGAACCAG GGACAAATGA GGCGATTATT  
5161 CCATTTCTTT AACAGTTGAA TGTGAGGAAG CTAGTGTCGA ATTTATGTTG CGAGTTCACA  
5221 CAAAAATTTA TATCTACCAG ACATATGGAA TGACTTATAT TTCATAGTTA ACTCAAAGAT  
5281 CATCCTATGG CATACTTTT TAGATCGAGT ATTATAATAA ATGTTAAATT TTATAATCGG  
5341 ACTGAACAAT GTTGTTTAGA TTTACAATAT TATCTTTTAA ATACTTAACA TTTTCAGCAG  
5401 TAGCATTTAA AACTCATGTT CTTACAGAAA ACTTCCAACC TCTCCAATA CTTCTATTCA  
5461 TTCAAAGAAA GGCCCTCTAT CAAGAATGGT CACAACCTGTT CCACCAAAGA ACCCGTTCAA  
5521 TCAAGTTGAA GATCAGCAAG ACTAGATTCT AAAGTTTACA AATCAAGATG AATGTACATT  
5581 TTTATATTGT GAATCTTTCC GATGACCAA CTTTTGTTG AATGTTTACA CGTTAAATAT  
5641 ATTTTGATCA AAGAATACTG TGGTTTTAAC AAGCTCTCTT GTATATGTTT TCAATAGCAG  
5701 AGTGCTCTGT TTCAAAGCCG CTCTGTTTCA GCATAGATAC CTTACAAGGT ATCTATGGTT  
5761 TCAGTGAAAG GTATTTCTAT GGTTCTGCCG TATTTTGGAT GTTTAGTTAT CATCTGGATA  
5821 GACACGTTGA CTGGACACGA CGGCATTTAA TTTTCCTTAC GTCGAAGATG TTGCGTAAGT  
5881 TACTTGCGGT TAATAATAAA ACATGAACGA TTCTTTGTCG AAAAGAAACA TTTATCGGAA  
5941 TGTACGGAAA ATAGCTTTGC TGTGCGTTGC TTGGTAAGTG GTGCCTTAGT TTTATAACTA  
6001 GATATTATAA TTCAACACGT ACCGGAGCAC TTCTTACCAG TGCCT

//

LOCUS 23 2223 bp DNA linear PLN 25-FEB-2004  
ACCESSION 23  
VERSION GeneMark.hmm v3.0 self\_training  
ORGANISM C.intestinalis  
FEATURES CHR ---

CDS complement (500..1723)  
 /translation="MSEIILKYDNKSSTKTLVEFVSNLTPKPDSEFQCSLYADKRLQN  
 PKFKNNKVLVVQGSHLKYVGDNYEDRHNPTASRYVLMEVDEKKQVVKIFETEFYFKL  
 RPIIGSEDIDIDEEREKTEKQLEQDERSFIERQDDLTEVFGSHRRKRAMVTRLRNKV  
 KDSTDAVQTAVEAIMENADTSLLLDEEGALDTMIIPCKTAETVEDVYPLTNIFPDH  
 VSRCLIEEAQKFIHPTGAEITEWKNQGEGLGSRFIVEHAKNPALAIVQNSQIHEYA  
 CCLQLMVCLIRLYKVKSSSEYRAKTVFTDLAEPVRDWVLSEFFLDGCNRRNKMPTRMK  
 DKVLAYAIVLAWHMDSFSTDGDMIKEAFSISQKKLSTHVRALGGNVNLLSKNGFKRT  
 SVILKLPLOFPNTAFKGRGQH"

ORIGIN

1 GTTTCATTT TATGCAATTA ATTTTAAATC TGTTCTAGAA GTTCGAGTTC ATTTTTTTGTG  
 61 TTAGCAACTG TGTGAATTTT ATAACGAAGC ATTATATTTA TACGTTTCAC TATTATGGCA  
 121 TAGTCTTAGG ACTACTTAAA AATGCTTAAG AGCTACTGCT TGTTTTGTAT CTTAAATTAT  
 181 TGTTTATTTA TTTACAGAAA ACTCAGTAAG ATAGAACCCTT GTTTATTTGG ATGTTAAAAA  
 241 TCTGGTGTTT GATTCGAAGA CAATGAAAAA ACAATTAATA ATGATTTACA ATTTGGCCTT  
 301 CCAAGACAGT TCCAAAAAGA GAACATACAT TTTACTTTTA CATTGAATGA AAGTTATGAA  
 361 ACAAGTTAAT TTAAACGTAA TATTCTATTC TATAATAACA TAAGATATAC TGAAATGCAG  
 421 TATGACTGAC CTCTTATGTA TATATTAAC AAAACAATG GCAGTTAATA GTAAAATAAG  
 481 GATTCTGTTT CCCCATGTGC TAATGGCCTT GTCCTCTGCC CTTAAAAGCA GTATTTGGAA  
 541 ACTGTAAAGG CAATTTTCAGG ATAACACTTG TACGTTTAAA GCCATTCTTA GATAACAAGT  
 601 TTACATTTCC ACCTAGTGCT CGAACATGGG TTGATAATTT TTTTGTGAA ATTGAAAAAG  
 661 CCTCCTTAAT CATGTCCCA TCAGTGCTAA AGGAATCCAT ATGCCAGGCC AGCACAATAG  
 721 CATAAGCCAA CACCTTATCT TTCATTCCGG TAGGCATTTT TCGATTTCTG TTACAACCAT  
 781 CAAAAAGAA TTCAGAGAGT ACCCAGTCTC GAACTGGTTC AGCTAGATCA GTAAATACTG  
 841 TCTTTGCACG ATATTTACTT GATTTTACTT TATACAATCT GATGAGACAC ACCATGAGTT  
 901 GTAAGCAGCA AGCATACTCA GTGTGAATTT GAGAGTTTTG CACGATTGCA AGTGCAGGAT  
 961 TCTTCGCATG TTCAACAATA AATCGAGATC CCAACCCTTC CCCTTGATTT TTCCATTCTG  
 1021 TAATTTCTCG TCCCCTTGGG TGAATAAAT TTTGAGCTTC CTCAATCAAG CAGCGACTTA  
 1081 CATGATCAGG GAAGATATTT GTTAAACGGT AAACATCTTC TACGGTCTCT GCGGTTTTAC  
 1141 AACATGGAAT TATCATTGTG TCCAAAGCAC CTTCTTCATC TAAAAGTAAA GAGGTGTCCG  
 1201 CTTTTCCAT GATTGCTTCA ACCGCAGTTT GAACAGCATC TGTGCTGTCT TTTACTTTGT  
 1261 TCCTTAATCT CGTTACCATC GCACGTTTTT TTCTGTGGCT TCCAAACACT TCAGTCAGGT  
 1321 CATCTTGCCCT CTCGATAAAG CTACGTTTCA CTTGCTCGAG CTGTTTTTCT GTCTTCTCTC  
 1381 TTTCTTCATC AATATCGATG TCCTCACTTC CAATAATGGG TCTCAATTTA AAATACTCAG  
 1441 TTTCAAAAAT CTTACCCACT TGTTTTTTTT CGTCAACTTC CATAAGAACA TATCTTGATG  
 1501 CAGTTGGATT GGCATGCCTA TCTTCATAAT TGTCTCCAAC ATATTTTAAA TGTGATCCTT  
 1561 GCACAACGAG CACTTTGTTG TTTTGAATT TTGGGTTCTG CAAACGTTTA TCCGCATATA  
 1621 GAGAGCATTG AAACCTGAA TCAGGTTTGG GTGTGCCATT GCTGAACTCT ACAAGAGTTT  
 1681 TTGTAAGTA TTTATTATCA TATTTAGTA TAATTTCACT CATTCTGTCT GGGGAACAA  
 1741 ACTTTATAAG TTTTTTAAA AGAAACACAT TTGTGTAGCT TTTTTTAAAT ATTGCATAAA  
 1801 TATTTTATAT TTTCAATTAT GCATAAGTAT TAATATAGCA AAGGCAATAT GCAGCTAAGG  
 1861 GTTGTGTCTT GTGTGTTATA ATGACTACAC TGGCACTGAT GCAAACCTTA CAGTATAATA  
 1921 CAATGACTGG TTTGTAATTG CTGTGTCAAT ATGGGTTGTA GTAAACTCAA ATTAAAACAA  
 1981 TTCGTAAACA TTTTAAACA ACGCGTTCAA TTTCTTCAA TGTAAGTTGA ATTTTCTACC  
 2041 AAACCTCGTAG AAAACACGTG CGTCGCACTG CACTCTACTT TATGGAAAGC ACCGTCATAG  
 2101 TTTGGTCACG TGTCTAAACG CTGACTAACG GTAGGTTACT AAGAGTCATC ACTTTTCGCC  
 2161 AGCGATCGGC GTGAATGTTG TGCAGTACAA TATTTAGGAA AATATTAAGA ATAAACTGCC  
 2221 GTT

//

LOCUS 24 6075 bp DNA linear PLN 25-FEB-2004  
 ACCESSION 24  
 VERSION GeneMark.hmm v3.0 self\_training  
 ORGANISM C.intestinalis  
 FEATURES CHR ---

CDS

join(500..539,792..922,1251..1295,1521..1620,2011..2120,2474..2575,2963..3106,3255..3425,3696..3741,4000..4119,4453..4612,5029..5119,5561..5575)

/translation="MGSIWDLRGIVLWAF TACY SKQYTQTFVSN S NFDNPERWVGHG
VPCAEDSIVFNEDQVVSIFVQTNASIKELYFPLNGEFIFADGVVWSADESLSPCVGD
DHGDHVLTYNSDPYNWFDIGNWQGSDENGDELSSKDLLDIEKIPCDFDTAAFP LKQS
WMVSMPE DINLHRLVIWNQDFDSATFSNYR TTGRGRYQFTGSGVISAERAICSDVTG
CACRAGDSLQSLICGMVTCYDVSCSLPISAAGQCCQLCGAVLTISY TQAYRESALQQ
LMVDLDQNVQYTG VHHILSKIDSYSRKLEI SEPFVQVLITDENTGTSTG SNAKDYAT
ALYNNILASADSIGVSEITMTSSGEGISPQTGMQSGEIAGLVIGLLIAIILVAVLVI
YIRKRTSSYSLRFSPFPKKSNDNYGNPLFDIDMNEVNIT"

ORIGIN

1 TTAAAACATT TTCAGTCGTT TTCTGTTCAA TGTTTTGCTA TGCCTGGTAT AAATTAACCC
61 TTAAGTCACT TCATGGGTGC AAATTTTGT TGTGTTGTTA GTTACAGTGG GTGGGGGAAG
121 ATGGGACACT GTTTTGTTCA ATTTTCTTGT CCCATTTGGT AGTAAACAAA GAAAATGCAA
181 AGAATTATAA AACCATATTC TCATGACTCC CATAGACCGT TGTTAATTGT TTAAAACACG
241 TTCAGGATAT TTGAATATCA TGTGCCAAAT GTGTCCCATC TTCCCCCAAA GTATTGTATC
301 TGTTCTGCTA AAGTCATTTT ATTGCTGGTG TTTGCAAAAC TACTTTAGTT TAGAGAGTGA
361 CCCTTATATG CATAATACAC ATATTAGTAC ACAGCGATAT CGTAGGGTGT AGATAAAATA
421 TTTACAGAAT TCTACAACCT TAGCCCGCG ACTGTATATA TAAGAGCGTT GTTAATAATT
481 AAATTCATGA TCAGAAAATA TGGGATCTAT ATGGGATCTA CGTGGTATAG TTCTATGGGG
541 TAAGATGGGA CACCTTTAGC AAGTAATATC CGAATATATT GAATTTTAAA CAATTCTATA
601 TGGGTATCAT GAGGATACTG TTTTATAACT GATTGTTCTT TGTTTACTAC CAACTAGGAA
661 GAGAATATAG AATGAAAAAT TGTTCCATCT TCCCCTACCC TAATAGATGA CGGCATCCTA
721 TCTTTAGGTG GTAACACCAT ACAAAAATA TATGCACAGT TCATAAATTT AAGCGGTGTT
781 TGTTCTTACA GCATTTACAG CGTGTTACTC GAAGCAATAT ACACAAACGT TTGTTTCCAA
841 TTCCAAC TTC GATAACCCTG AAAGATGGGT CGGACACGGC GTGCCGTGTG CAGAGGACAG
901 CATCGTATTT AATGAAGACC AGGTAGTTAA AATTAGTCAT TTAAACAAAT CTTCTGCCAT
961 TTAAATTTTT AGGTAAGTTT TTCTAATTGT CTTTTAGCAG CTTATCTGGT ATAAAACGTC
1021 TACTGCAGTC TTGCCGTACT ACAGTACTGT GGGGAGATG GGACACATTT ATCATATATT
1081 ATTTAAATAT C CTGATCGTT TTTTAAACAA TTAACAATGA TCTGTGGGAG TCGTGAGGGT
1141 ACGATTTTAT AATTCTTTGG AATGTTTTTT GATTACTATC AAATTGGATG AAAAAATATA
1201 ATAAAAAGGT GTCCCATCTT TCCCACCCCT ACCATGTGTA TTTGTTTCAG GTTGTGTCTA
1261 TATTTGTTCA GACCAACGCC AGCATAAAAG AATTGGTAAG AAGTTTTATT TGCTCATTCT
1321 AGAGCAGCAG CATTTTGTGA ATATTGGAAG CTACGACCAC GCTTTTCAA TGACACTTAA
1381 AACTTTTTCT TTCATAGCGT AGTTTATCAA CTGTTGTTTT GCTGTTGATT CCCTCCTCTT
1441 TGTTTTTTTA AATGGCATGA CCTCGGCTAT CGTTTTTAAA GGATAAATAA AAATTATGTT
1501 ATATATTATG TTTTAAACAG TATTTTCTT TGAACGGCGA GTTTATATTC GCTGATGGAG
1561 TTGTATGGAG TGCAGATGAA AGCCTTTCAC CATGTGTGGG TGACGATCAC GGCGATCATG
1621 GTGAGTTCGT GATATCGTGA TAATGTGAAA AAAATATTTT CAGTAGTTTT TTCAAAGCG
1681 CGCGAACGAG TGTCGTTTTT TGCTAATTCA AATCTCTTCA CCGGTTTAA TAATACTATC
1741 TTCGATATTT TTGACAGGTA TTTATTTAAA AACTATATTA TAGTAGGTTG GGAAAGATGG
1801 GAATAATATA TAAACAACCT GATCCTGTTT TAAACAATTA ACAACGATCT ATCGAAGTCG
1861 TGAGGATACG GTTTTATAAT TATTTGAATG TTCTTGTTTT ACTACTAAAT GGGATGAGAA
1921 AATAGAATGA AAAGGTGTCT AAACCTCCCC CACCCTACAA TATTTAAGTT GTTATGTTTA
1981 TAAGTAGTTA AATTATGTTT TTTTTATAG TTTTACTTA CAATTCTGAT CCTTACAATT
2041 GGTGTTGACAT CCGTAACTGG CAGGGTAGCG AGAAAACGG AGACGAACG TCAAGCAAAG
2101 ATTTATTAGA CATTGAAAAG GTATATTTGA AATATTTTTC ATAAAACGCC TAAAGTGCGC
2161 AAATATATCA TGTGTGTTTT GAAAATTCAA TGTATAGTTT GCCAAAATT TGCTCCAACT
2221 TAGCGTTTTT TATTTGGTTG TTCGAAATGT TAGCCATATA AAATAAAAAA TATGATACTC
2281 CAAAAACTA ATTACCCACA AAGTTAAATG CGTGAAACCT CGTAAGCGGG CATGAATTGT
2341 ATGAAACAGA ATGTGTTATA ACGACTATCA TTGCCCCGCA CGCCAAGATA AATAAGTTAC
2401 ACTCATTCCA TTCACGCCCT TTGCACTGTA TAGGCCTATA ATGTAATTTA CAATTGTTTG
2461 CAATTAATTT TAGATTCCGT GTGATTTCGA CACTGCAGCA TTTCCACTTA AGCAATCATG
2521 GATGGTTTTG ATGCCAGAAG ATATTAATCT ACACCGGTTA GTTATTTGGA ATCAGGTACG
2581 TTTTTC AATT TTTTGGCCAT AAATTTAGGC TGTTTTGTAA TCAGAGAAAA GTTATATAAC
2641 TATAAACCT TATCCCTGCG GCTCTTATAG ACCGTGGTTA ACTGTTTAAA ACACAATCAG

2701 GGTATTTGGA TATTATATTT TGGAGGTTTC CTATCTTCCC CTACCGACTA TTCATTGGAA  
2761 TATGACCCAT ATAAGCTAAT TTATCCTCTA TTGTGGGTTT TGCAGATACG CTTAAATTTT  
2821 AAAATTTTAC CGAAGAAGGT TTTTACCCAT AGCATGTTTT ATAAATACTG TCGTTTTTTG  
2881 CCAGTTCTCA ATTTCTACAT TGTTTGAATT TAAATTAATT TGATCTTCTA TTAAAAAAT  
2941 GAAAATTAAG TTTGTGTTTC AGGATTTTCA CAGCGCCACA TTTTCCAATT ATCGAACAAAC  
3001 CGGTAGAGGG CGCTACCAGT TCACAGGCAG TGGTGTAATA TCTGCTGAGC GAGCCATATG  
3061 CAGTGACGTA ACTGGATGTG CATGTCGTGC GGGCGACAGT CTTCAGGTTT TATTGCAAAA  
3121 TGACTTAATT TTGTTGTAAT ATGTTTTAAT TTCGTTCTAC AATTACTTAA TTGTGTTGTA  
3181 AAATTGATTA TTTTTTGTA AATTACTTAA TTAAGGTTA CTCAGTTTTA CAAAATTACC  
3241 GTTTTTAAAA ACAGAGTCTA ATTTGCGGAA TGGTCACGTG TTATGACGTC AGCTGTTCTC  
3301 TTCCGATCTC TGCAGCCGGC CAGTGTGTC AGCTGTGTGG AGCAGTGTG ACCATTGCTT  
3361 ACACACAAGC TTATAGGGAA AGCGCATTGC AACAGCTAAT GGTGACTTGG GACCAAAACG  
3421 TTCAGGTAAC ACATATATGG TACTGTGGGG TAAGATGGAT ACTTTTAACA CATACTGTTC  
3481 CATATACTAA TCATGTTTTA AACAATTACA AACGTTTTT ATGGTCGCGA GGCTATACAG  
3541 TTTGTAATTA TTTAAACTTT ACCTACCAA TGGGACAAA AATAAAATGT TTAATAAATG  
3601 GGTTAAGAAA AATTAATGTA AGCATATATA CCACGTTACC GGGCCTACTA TGAATAAAAT  
3661 ATAAAGATAA AAAATTAACT AATTTGTGGT TTTAGTACAC AGGTGTGCAT CATATACTCT  
3721 CAAAAATTGA CTCCTACTCA AGTAAGTATA AATTCAGCTT ATATTGCGGA ACTATGGTGG  
3781 GGTGGGCGAA GATGGGACAC TTTATCACTG AATATTCAA TATGCTGATC GTGTTTTAAA  
3841 CAATAATGGT CTATGGGAGT CGTGGGAATA CGGTTTTATA ATTTTTTGAA TATTCTATGT  
3901 TTACTACCAA ATGAGACGAG AAAATAGCAT GAAAAGCTGC CCTATCTTTC CCTATCCTAC  
3961 TAAACCCAAA ACCGTTTTTT TTTATACACC TCGCTGCAGG AAAATTGGAA ATTTGCGAGC  
4021 CTTTTGTTCA GGTTTTAATA ACGGACGAAA ACACGGGGAC TTCTACTGGT TCTAATGCGA  
4081 AGGATTACGC AACTGCATTG TACAATAATA TACTAGCTTG TAAGACTTAG TAATTTTTTTA  
4141 TTTTTCTAAG ACTTATAACG GTTTAATTTA ATTTTTTTCT AAGACTTCAA TTTTTTTTTT  
4201 AAGACTTTAC ATTTAATTTT TTTTTCTAAA ACCTAATATT TTTTCCAAG ACCTAATATT  
4261 TTGTTTTAAT TTTTTTTCCA AGATTTAACA TTTCATTCTA TTTTTTTCT AAGACTTAAT  
4321 ACTTTTTAAT TTTCTCTAAG ATTTAATATT TTATTTTCAAT TTTTGTAAGA CTTAATATTT  
4381 TATTTTTAAT TTTTTGTGAG ACTTGATATT TAACTTTATT TTTTCCAAG ACTTAAAAAT  
4441 CATATTTACC AGCTGCAGAT TCAATCGGAG TTTCCGAAAT CACAATGACG TCATCAGGAG  
4501 AAGGGATTTT CCGCAGACG GGAATGCAAA GCGGGGAAAT TGCTGGACTC GTCATAGGGT  
4561 TACTGATTGC TATAATATTG GTCGCCGTTT TGGTGATTTA TATTCGTAAA AGGTATATGT  
4621 ATATATATAT ATAGTAGTGT GGGGAAAGAT GGGACACCTT TAGTACACTT TATTTATATA  
4681 TCCTGATTGT GCTTAAAATA TTTAACAACG GTCTATGAGA GTTGCTAGGA TACGGTTTTA  
4741 TAATCTTTTG AATGTTCTTT GTTTACTACC AAATGCTGGA ACAAAAAAAA AATAGAATGA  
4801 GAATATGTCC CGTCTTCCCC CACCTTACTA TAGTAATGAT AAAATAGTGT TTTTTGTGT  
4861 ACGATGTCAA ATATTAGGGC GACTTTATTT TTTTTAAAT ACGCAAGGCT ATTTTAAACG  
4921 AATATTGAAA ATAAATTTTG GTGTTAACTA CCTGAAAATA AAAGATGGTT GTTGAACTA  
4981 TGACAAACTA GACTTTAATA CCATAAAAT ATTAATTTAA TTTTTCAGAA CATCATCATA  
5041 TTCACTTCGA TTCAGTCCAT TCCCGAAGAA GAGCAACGAC AATTATGGAA ATCCTCTGTT  
5101 TGACATCGAC ATGAATGAGG TGGGAGTAAA ATTATCTGAT AGGAATAAAA AAATATTTGT  
5161 GAGGAGTAAA AATTATCCGC GACGAAAAAA TCGATTTAAA TTATATAGTA GGCTACTGTA  
5221 GGCTAAAGTG AATAACTTTA GCACATAGCA GTAAAATATC TTGATAGTGA AATGGCGTTT  
5281 TATCTCCGTA CAAATAATTA AACACACTCA CTCACAAAT TGAAATAATT TATCTGAAAT  
5341 AAAAAATGTAG AATATTTTCT CAATGTAATT AGAATCGCGA AAGCTAAACA CAAAAAAGTC  
5401 ATGATAAAAA AATGACAAAA CATAAAAAAA TTGATAAAAC ATGAAATACA AATTGGACCC  
5461 AAAACATGGT CAAAGCCCAA CTCTATAAAT CAGGACCTCC TTATATACCC ATACAAAATA  
5521 AAACCACTAA ACTTCCAAT TGTCATTCAA AATCTCCCAG GTCAATATCA CTTAATAAGC  
5581 CCAACCTATC AAATTAGCCC TTATAGCGTA ACCGGTTTTA TACATTGGTC TTTAGCTACC  
5641 TTATAGCGTA ACCGGTTTTA TACATTGGTC TACTACCTTA TAGCGTAACC GGTTTTTTAT  
5701 ACATTGGTCT TTAGCGACCT CATTTCCTTA TAAGTGTAACC CCATTTAAAT TTCACTTACA  
5761 GCTACCTATT TCTGTAAAA CCTACCCCA TTTAAAATAC ACTTTCCACC GTAACTCTAC  
5821 TTCATTAATT CTAGTTATAA ATTTCTGACA CGAGTTTAGA AAAAGTTTTA TTAAAGTTAA  
5881 AATCAACAGA AATAAAACGG TGGTATATTT TTTTTAATT TAACACAAGT TAAGTTTTAT  
5941 TAAATTTTAC ATTTGGTGGT ATATTTTTTC AAATTTAACA CAAGTGAAGT TTTATTAAT  
6001 TTAAAATCAA CAAATATAAA ACGGTGTTTA ATCCAATTTT TTAACAGTT TTATTAAT  
6061 CTTTCATTAG CAAAA

//

LOCUS 25 6098 bp DNA linear PLN 25-FEB-2004  
ACCESSION 25  
VERSION GeneMark.hmm v3.0 self\_training  
ORGANISM C.intestinalis  
FEATURES  
CDS join(500..647,1387..1525,3402..3614,4229..4380,4799..5598)  
/translation="MSVTDPLLKSLKYLIEEFYSVDEKVTDESPYLEQFCITVEKCF  
TKGMKPGQWLIPKDNNGDSYRRKRLWQILESFETNGPVPYISISTAVNAALSINKRVRGK  
EGRRLYLIRHCLAHSSLHVLVEFLMTRRRELRLDIYMGDKENILTMLNVFGGSSIM  
IHEQLSEQLRSLLLTLCSTLSLHLDLNSFFLDETWKLPQTKSAEFVPTNELGIEMI  
YVQGHGIIISRIKAGSVAETPSLGVGDLLVEMNGHLLFPAAAGGEKDAKCVWRECKS  
RSKPCMLTVVKPRSPVTGGIYPLKAILTEYHEWMDIYYKTRQKLEDKNLRDEIKA  
DVMSPLNENEKIPVLDPTAAENGSGGSYKVITYIGEVLGTGEDGGVDQIESVIRQALNK  
RSDRTSFNVTITLTQIGVETGIGNHSQVEPLFNHXYADISSCGKIVTDDFHFCYIAG  
DTFCTLSKQFVGYVFRAETLAQSRAVLNGIYQGFKRTTWFM"

ORIGIN

1 ACGAGATAAT TTATAACGAG CTGTAAAGAG GAAACTGAAG CAGCTTCGCA ACAGGAAATC  
61 AGTGGCACAG TGCGTTCTAA CAACGATGTG GGTGTTTGGT GGTTACAATG GTTTGTTC  
121 TTGTGTGAGT TGTGAGGTTA CTTGGTGGTA ATACATAAAT AGAAAGATAT CTTACAGAAA  
181 TTTGAATTAT AATATGAATT TAAATCGTGA ATAATTTGTC TGCCAGCAGC ACCATATGTT  
241 TATACAGTAT ATAGGTTGAG CTGTATATGA TGTATTAGCT AGATTGTTGA TTATACAGTT  
301 TGTTGGTTGT CTAGTTATAT TAGCACCAGG TGGATGGCTA TTAATATTAT AATGATAATA  
361 ATTAGCATGT TTTACGTGTG ATGTTTGTTC TAAAAGTTAT TTATCTGTTT GTTTGTTC  
421 ACAGCTCTAA ATTACCACCA TGACTAGCAT AGTAAACCTG GAACTCAGAT ATTTAAATAA  
481 CATTAAAAGA TTAACCAGTA TGTCGGTCAC TGACCCTCTA TTGAAAAGTT TGAATATTT  
541 GATCGAGGAA TTTTATTCGG TTGATGAAAA AGTAAACCGAT GAAAGTCCGT ATTTGGAACA  
601 GTTTTGTATA ACTGTGGAGA AGTGTTCCTAC CAAGGGAATG AAACCAGGTG AAGGTTTTAT  
661 ACAAGGGTGT ATTGAACTGT GTGTTTGTCTG CACACTGATG CGAATGAATG TAACTTTTTT  
721 ATTTATCCTT GTGTGACTGG AAAAACAGTC GTCATAATTC TCGCTTGCAA GTTACCATGT  
781 ATGTCAATTT GAGGGTGATT GTTTTCTGTA TGGCTGACAA TTTAGATAAC CCATGAGTGT  
841 CCACTGGGTT GAAACAATTA TTGTCTTGTT AAAAAGGACA CATGCTTTTA CAACGAGAAC  
901 AGCCACGACC TTGAACAAGT TACCCCTTTA AAAAGTGGCA GGCGAGCTAA CCACTGTTCC  
961 ATGATGTGCA CTTTAATAAA ATCTGTGTAT TTTTGTGCA AAAGGATCAG TTTTCTCAA  
1021 TAACATGTTG TTACACCAA GTAATATATC CAGGAAATGA TTAATTGCAT GGTAGTGTGT  
1081 TGTGTTGCTA ATTTGGGATG AATAACAATT TTAATGCGAA AAACGTGAAT CTTGCTATAT  
1141 CTGTTATGA CTATTTGCA GAGTTCCTCAG TTATATTTAT TTCAAGTGTT ACAATATGAT  
1201 TTATCAATTC TTAATAATGTT ACTATTTATT TCCACGTGTT TTTTGAACGA CCAATTTAAT  
1261 TTTTCTAGTT AGATTTTTCC AAGTTGTCAA CTATATTTCT GTTTTTACAA TGTTGCGAAG  
1321 TGCAGACTAT ATTTCCAGT GTTTCCAGAT ACATTCTTGT TTTTAAAGTGT TGCGAATTAT  
1381 TTCAAGGACA ATGGTTGATT CCGAAAGACA ATGGGGATTC ATACAGAAGA AAAAGGTTGT  
1441 GGCAGATTCT AGAATCCTTC GAAACCAACG GACCCGTCCT ATATTCGATA TCAACTGCTG  
1501 TTAATGCTGC GTTGAGCAAT AAAAGGTGAC GGAATAATAA TCTATATGGG TGAGGACGGT  
1561 GTGACAAGCG TTGGGACCTG GGATTGAGAC CACAGTTGGT CCATTACCC AACATTGTAT  
1621 ATGCAGGTTT TATTCTATAT GGGTGAGTTT CTACAGTGAG GCATGCCATG GGACCTGGGA  
1681 TTTAGACCAG AGTTAGCCCA TTACCCCAAC ATTGTATATG TACAGTCTGT TGCATGGGTG  
1741 AGGTCCTCAG TAAGGCATGC CATAGGGCCG GAGATTTTAG CCAACACTTA AAGTGCCACA  
1801 AGCCATTCAG TGACCACTGT GTATTGTACA AATGTTCAA GTACCTAAAG ATACTTACTA  
1861 AGCCATGGTG GTGAAATAAA CAATGCAATG ACAATTAAGA AGTTGAAACA TTATTGTTCA  
1921 ATCATAACAC AAGTTGTTTT CACAGAAGTT AAATAATAAA CATTAGAAT ATGCCAAGTT  
1981 GAAACAATAA TAAACATACT GTAGATAAAC CTCATGCTTA CTATCCAGTT ATACCATGGC  
2041 ACACATGGTG TATTCATACA CCTAACGCTC ACTGTCAAGT TATAACATGG GTGTCTTCTT  
2101 ATACCATGGC ACTGGCACAC ATGGTGTATT CATAACCTC ACGCTCACTG TCAAGTTATA  
2161 ACATGGGTGT CTTCTTATAC GCCAGGCACA CATGGTGTAT TCATACACCT CATGCTCATT  
2221 GTCAAGTTAT AACATGGGTG TCTTCTTATA CACCCAGCAC ACATGGGTGA TTCATACACC

2281 TCACGCTCAC TGTC AAGTTA TAACATGGGT GTCTTCTTAT ACCATGGCAC TGGCACACAT  
2341 GGTGTATTCA TACACCTAAC GCTCACTGTC AAGTTATAAC ATGGGTGTCT TCTTATACAG  
2401 CCACTGGCAC ACATGGTGTA TTCATACACC TCATGCTCAT TGTC AAGTTA TAACATGGGT  
2461 GTCTTCTTAT ACATCCTAGC ACACATGGTG TATTCATACA CCTCACGCTC ATTGTCAAGT  
2521 TATAACATGG GTGTCTTCTT ATACCATGGC ACTGGCACAC ATGGGTGTATT CATAACCCCA  
2581 TGCTCACTGT CAAGTTATAA CATGGGTGTC TTCTTATACC ATGGCACTGG CACACATGGT  
2641 GTATTCATAC ACCTAACGCT CACTGTCAAG TTATAACATG GGTGTCTTCT TATACCATGG  
2701 CACTGGCACA CATGGTGTAT TCATACACCT AACGCTCACT GTCAAGTTAT AACATGGGTG  
2761 TCTTCTTATA CCATGGCACT GGCACACATG GTGTATTCAT ACACCTAACG CTCACTGTCA  
2821 AGTTATAACA TTAAGGTGTC AGTTTTTAAT TTTTTTTTGT GACATAATGT GTTTTACTAT  
2881 CTTAGTATTC AATGAGGTTT CCTATGTTTA ACCTATTTTG ATGGGTGTAA CTGATTTTTA  
2941 ACAATGTCAC CCCAGATTTT ACCCTGTGTG TAGGTGTCTA TACAAACAAG CAGAGCCAAA  
3001 GTATATTGCA TTCACCACAT TAATCAATGA GGTTCCCTAT GTTTGACAAC TATGAGTGTA  
3061 ACTGTATTTT AACAATGTTA CCCCAGATTT TACCCTGCTG TTAGGTGTCT ATACAAACAA  
3121 TAAGAGCCAA AGTATATTGC ATTCACCACA TTAATCAATG AGGTTCCCTA TGTTTGACAA  
3181 CTATGAATGT AACTGTATTT TAACAACGTC ACCCCAGATT TTACCCTGCC GTTAGGTGTC  
3241 CATACAAACA AGCAGATCCA AAGTATATTG CATTACCAC ATTAATCAAT GAGGTTCTCT  
3301 ATGTTTGACA ACTATGAGTG TAATTACATT CTAACAATTT CTCACCACAT TTTGTTAAGT  
3361 TTTAAAAATC TAACACCAAT AAATCGACCC CAACCACGCA GGGTACGGGG CAAGGAGGGC  
3421 CGACTACGAT ATCTCATCCG ACATTGCCTC GCACACAGCA GCTTACATGT GTTGGTGGAA  
3481 TTCCTTATGA CAAGAAGGAA GGAAGTGA GATATTTACA TGGTGGGGGA CAAGGAAAAT  
3541 ATATTGACCA TGCTCAATGT GTTTGGGGGA GGTAGCTCCA TCATGATACA TGAACAAC TA  
3601 AGTGAGCAGC TCAGGTAAGA TTAAGGGATC GTGTATTGGA ATATTTTTAA TATGTTGATA  
3661 CCCAGTGTAC CCCATTGTAT ATGTTTGAGG TATTCTGGCG ATATGTGGC AAATAAGACT  
3721 AGATTTCCCC TATTGTTTAT CGTATATATT GGACAATGAC CAAGCTGTCA AGGGATGATC  
3781 TTCCATCCAT TCTATAAACT CCTTGTCCCC ATACCTTCCA TAAAGGGACA AGCTTTTTGC  
3841 ACCAAGCTGT TTAACACATA GATATGTTAG ACAAAGATGT AATACACAGC AATTAACAAT  
3901 GCTGAATCA GTCTATTGCC CCAGTTGAAA CCACTCGGCA AATTCAAGC TCAGTGCACC  
3961 ACTAATACTA ATGCTATGAA TGTAACTTGC TTCATCCACG CATGGCCAGG AAATGGCAGT  
4021 TGTTATAAAT TTAACACCCC GATTTACAGG TCCCTTCTAT TAACATGTCC AAACAATATA  
4081 TCACACATTC TTATGTGAAA AGACTGGTGG CTATAACTGA ACCCCATACA CCATTAAAGC  
4141 TTGGGATTCT TAACCCTACA CAGAAGTTGC TTTATCCTCG CGCGGCTGGA AAATGACAAT  
4201 TACTATAACA CTAACCCCC ATCTACAGGT CCCTCCTACT AACATGTTCC ACCTCTCTTT  
4261 CCTTCCATCT TGACCTCACT AATAGTTTCT TCCTGGATGA AACTTGGA AAA CTTCACAAA  
4321 CTAAATCAGC CGAGTTTGTT CCAACCAATG AACTCGGGAT AGAGATGATA TATGTACAAG  
4381 GTATGGGACA ATCACATGTT TGAAAAATTG TTCATAGTCT TTGATCCATC TCACTTACAA  
4441 CAACATTTAT GGCAGTGGTT CCCAACTGT GGCACGCGAG CACTCATTAG GTTTACACCA  
4501 AACAATCGCG ATACGTTGCT TTACGCGTAC AAATTATTCT TTGCAAACAT ATTTATACTT  
4561 TAATTGTGCG CATACTGGA AATGTATTTT AAACACCTGC AGGCTAAATA ATCAAGGGGA  
4621 CAATCGATAT TATGATGCAA ATAATCGCCG TCGACGCCTT GTGAATTGCT ATTATGTCGT  
4681 AATCAATTGC CAGGTCAAAC AATCGCTATT ATGATGCAAT GAATCCACGT GTGAATTCTT  
4741 ACTATTACGT AACAAACATC ACATTCATTC ATTCATTTAC TCAAGTTATA TGTTACAGGT  
4801 CATGGAATCA TCAGTCGAAT TAAAGCTGGC AGTGTAGCAG CGGAAACCCC AAGCCTTGGT  
4861 GTCGGGGATC TCCTGGTTGA GATGAACGGA CACCTCTTGT TCCCTGCTGC TGCTGGTGGT  
4921 GAGAAAGACG CCAAGTGCCT GTGGAGGGAA TGTA AAAAGTC GCAGCAAGCC TTGTATGTTG  
4981 ACGGTGGTCA AACCGCGATC ACCCGTCACT GGAGGCATAT ATCCCCACT GAAAGCGATC  
5041 CTCACAGAGT ACCATGAATG GATGGACATC TATTATAAAA CGCGGAACA AAAA ACTTGAG  
5101 GATAAAA ACT TGAGGGATGA AATTAAGCC GACGTGATGT CGCCACTGAA TGAGAACGAG  
5161 AAGATACCGG TCCTTGATCC GACAGCTGCA GAAAATGGGT CCGGGGGATC GTATAAAGTC  
5221 ACGTATATTG GTGAAGTATT GACAGGGGAG GATGGGGGGG TGGATCAGAT TGAAAGCGTG  
5281 ATTCGGCAGG CTTTAAATAA AAGATCGGAC AGAACTTCTT TTAATGTGAC GATCACACTT  
5341 ACACAGATAG GGGTGGAGAC GGGCATAGGA AACACAGCC AAGTCGAACC ACTGTTTAAAT  
5401 CATAAATACG CTGATATATC AAGCTGTGGG AAGATTGTAA CAGACGATTT CCACTTCTGC  
5461 TACATAGCTG GCGACACCTT CTGTACATTG AGCAAGCAGT TTGTGGGATA TGTGTTTAGA  
5521 GCTGAAACAT TGGCTCAATC AAGAGCTGTA TTGAATGGTA TCTACCAAGG GTTTAAACGC  
5581 ACTACATGGT TCATGTAACG CGATAATATT CACTTAACAG TTTAATTGTG CAATAACATG  
5641 TATGGTGA AA TTATAGGTGC GACTTTAAGG GGAGGGAGGG ATAGTTAGAC ACACAATCCT



```

5701 ATGAAATAAA CTTGTTGGTT GTAATGTGTT TACTGATTAA TGCAGCGTGG ATTGTTCCAA
5761 GGTTGGCATC TCTACCCTGC CACCCAGGT TTGGTGCCTT TGATTGCAAT GTCTTGTTC
5821 GTAGCAAGTG TATACGTAAC TCAATGCTGT CACTACTTTA CTGTGTGAAT ACTTTGTACT
5881 TTTTGCTTGA ACTAATATTA CAAAGTTAAC AAGGAGTTTA TTATTGTTGC CTGGTGTTAA
5941 TTATTTCTAA CTTTTATCAT GAACTTTGTA ATGCTGTTGT TTTTGTTCAC ACACATAAGG
6001 TACTGCAATA AAACAACTT AACTATTCTA CAAAGAAGTA ATAAAAGTTA CAGCTTATTT
6061 TAATGTCCTT GCACATTAA TAAAGGTAAC CGTGTTC

```

//

LOCUS 26 2553 bp DNA linear PLN 25-FEB-2004

ACCESSION 26

VERSION GeneMark.hmm v3.0 self\_training

ORGANISM C.intestinalis

FEATURES CHR ---

CDS 500..2053

```

/translation="MTFCFSSGNTGMVCPKEFVSMVVFVVFECRKYVVRLLTMQSTI
NYDQLKVVNSTAEDRIESRHENFMKTFSTSVFVKPEPVKPGMPTKPTIAFELGHAGLN
RPKSRYA AVRK ITRKTEDPPTVYDDPRVHDVRLHISKHKKGLQTETAPDDLVLAKD
RNIGCLRMLMKKLPFERTRKEHKRVYRLLRELWPSLACLEDSSGDSHPVLRRELATV
AALDSYGEAGLTVFGNTGLHMILRGSVRPQTLPIRAGLSTEDDAEVFSPPTPLLR
KMGKQLQHGDFGTLEKVEGREVNTKVMSTVLEPCQFLKIAIADYKRILERIKERIQ
AEKTTVVQASDLYRNWPGLSLRKLALVWQTIPIGNTVVIPEGEIAPFIFFLKKGKC
DVFQKQVEAIKTLPNRRKLFKRSVRMGSLREGDSIGEDSLLEKKPLSCSIVSCEDLE
VGVITLERLELLDPTTRSLLSQSSRPKFDDVTDIIQENFVQEQEMKDDWAEKRNVL
LRTINYCGIRPGYGKWK"

```

ORIGIN

```

1 AAGCAAGTAA AGAAACTGTT AAGAAAACAT TAGTATGTCG ATTTAAATTA GTTGTTTATT
61 AGGTAATTTT CTAATCGTAC AACCGTAAAC TAAACACCGG TTACAGAAAA CAGGTTTCGT
121 ATATATGTGA TTAACAAAGT TTATAAAATT AATACGTTGA CCAAATCAA AACGATTGTG
181 GCACTGAACA GCAAAAACG GAGCGTGGCA TAACAGAATT AAAATTCGGT GTCGCGTGAA
241 ATAAGGTCAC CTGAAACGAA CAAGGCACAC GTAGATCAGA GTTTCAATAA CAAATCCGCC
301 CCTTGAAGGA TAATGGAAAC AAATGGAAAG TTTTCGCAAC AAAAGGCGGG AGCTCTTTAT
361 TCGCGCTTAT GTGAATGTTG AAGTGTTTGT TTCGAGTCAT GATTTTCAGT TGGCCAAAAT
421 AAAAATGTTG TAATCGTTTT TGGAAAATA GTTGTATTTA CCTAAATTTG GAAAACATAC
481 CTTGTTTCTT TTGATTAAGA TGACTTTTTG CTTTTCGTCT GGAAACACTG GCATGGTGTG
541 TCCAAAAGAA TTCGTTTCGA TGGTTGTGTT CGTAGTTTTT GAGTGTAAGC GAAAGTACGT
601 GGTAAGGTTA ACGATGCAGT CAACTATAAA CTACGATCAA CTTAAAGTTG TTAATAGTAC
661 AGCGGAAGAC AGGATCGAAT CACGACATGA AAATTTTCATG AAAACTTTCA CCAGCGTTTT
721 TGTGAAGCCC GAGCCTGTGA AGCCGGGAAT GCCAACCAA CCAACGATAG CGTTTGAACT
781 GGGCCATGCT GGTTTGAATC GACCCAAATC CAGATATGCG GCGGTAAGAG GCAAAATCAC
841 ACGAAAACG GAGGACCCAC CTACTGTGTA CGATGATCCA AGAGTACATG ATGTTAGACT
901 TCATATATCA AAGCATAAGA AAGGTTTGCA AACTGAAACA GCTCCGGACG ATCTGGTATT
961 GGCAAAAGAT CGGAATATTG GGTGTCTGAG AATGCTGATG AAGAAGTTGC CTTTTGAGAG
1021 AACACGCAAG GAACACAAAA GGGTGTATCG TCTACTACGC GAGCTGTGGC CTTCTGAACT
1081 TGCTTGCTTG CTCGAAGATA GTGGTGACAG TCACCCAGTG CTCCGCGAAC TCGCAACAGT
1141 GGCAGCTTTG GATAGTTACG GAGAAGCGGG AACTGACAGT TTCGAAAACA CTGGCCTACA
1201 TATGATTCTT CGTGGATCTG TAAGACCGCA AACTCTTCCA TATATTCGTG CAGGGTTGTC
1261 TACTGAAGAT GACGCTGAAG TATTTCTTTC CCCCACCCTT TTGCTTCGGA GAAAAATGGG
1321 GAAACTGCAA CATGGCGATT GGTTCCGGAC CCTTGAAAAG GTCGAAGGTC GAGAGGTCAA
1381 CACAAAGGTC ATGACCTCCG TCACCTTAGA ACCGTGCCAA TTTTAAAGA TCGCAATAGC
1441 GGATTACAAG CGCATTTTGG AACGAATAAA GGAGCGAATT CAAGCCGAAA AGACAACCGT
1501 TGTTCAAGCG AGCGACTTAT ATAGAAATTG GCCCGGATTA TCACTTCGAA AACTGGCCGC
1561 ACTGGTTGAA TGGCAAACCA TACCTGGAAA CACTGTTGTT ATACCAGAAG GAGAAATCGC
1621 TCCCTTCATA TTTTCTCTCA AAAAGGGTAA ATGCGACGTC TTCAAGCAAG TGGAGGCAAT
1681 CAAGACTCTT CCGAACGGTA GAAGAAAAAA GCTCTTCCGG AGCGTGAGGA TGGGATCGTT
1741 AAGGGAGGGA GACTCGATCG GAGAGGACAG TTTGTTGGAA AAGAAACCTT TGTCTTGTT

```

```

1801 CATCGTGTCT TGCGAAGATT TGGAAGTTGG TGTTATTACA TTGGAAAGAC TTGAGTTGTT
1861 GGACCCCACC ACACGTTTCT TGCTTTCTCA AAGCTCTCGG CCAAAGTTTG ATGACGTCAC
1921 TGATGACATC ATTCAAGAGA ACTTCGTTCA GCAGGAAATG AAAGACGATT GGGCAGAGTT
1981 GAAACGTAAC GTGTTACTAC GAACCATAAA CTA CTACTGTGGT ATTCGACCCG GTTACGGAAA
2041 ATGGGCGAAA TAAAAATATA AATTCTTGTT TTTTTTAGTT TGTATAAAAA AGTGACACTT
2101 TATATCGAAT GCGAATATTT ATTTTTTCTAGA AAAAATAAAT ACTGAGACTG CGTACAACGG
2161 TTTGAAAATG CTACAACGAA AGGGATAGCT GCGTGGAATG AACTACATAG AAGTTTTAAT
2221 CGGAAATTAT TCCAAAACAC TGTTCCAGCT ATAATTGTTA ATAAAGTCAA TAATATGTAG
2281 ATTTTATACA AAAAGATGAG ACTTAAGGTT GGTAGCTGGC AGTGCTGACC GATAATATTA
2341 TGTGCAGTGT TGTGTAGTTT GAGAGAAAAC TATAAAGCAA CACTGTTAAT CCACCATGCT
2401 TTCAATTTAT CGACTCGAAC TTTGTTTGTAT CTGCGCAAGT CGTCGTTTTA AATCGGATAT
2461 ATTTGCTGAA GAACTAATGC TGC GTTCTTT CGGTTGCGAT TGAAAGCCGC TGGATCGAAC
2521 AGCCGCTTCA TCGGCCTGTA ATGACACAAT AAA

```

//

LOCUS 27 7071 bp DNA linear PLN 25-FEB-2004

ACCESSION 27

VERSION GeneMark.hmm v3.0 self\_training

ORGANISM C.intestinalis

FEATURES CHR ---

```

CDS
    join(500..2719,6497..6571)
    /translation="MSKFFAAESSSDTDVSSSEDETTPAPSRSSRATVQRQFLLSDD
EEEVQHVVRSACEKRWEELQNI IKLMRNARKIKDMSKLMDEFDNLCKLYIKSKTVVL
KEGIPRFYIQNLVETEDCITELWQDKEGRKKMSKLNKSLGALRQKLRKYLRDFEKE
VEDYRLHPDEEEHVPEKHVEENDAPTFLGSPVKVAQLEKPEPLQDKDDSDSDWG
FDDDDSTSDSEDEGGIGARQLTADYFLKKTAGKDDKSKKKERVQQSKSKKKTDDDWE
EVKGGGKVAKVTALFEKGTETHPVVMKKLNEIILNRRRSTVVRKQDFLLQLRQI
AEENNLGIALTVRLTFDIIASLFDYNSKILDCMKSEPWAQEVLYVEEVLDDLQENPD
IVVAEHI SQESENVSDEKAGYRRCGSPVTLVEKLHSEYIKILQTAHSTDYVKHLR
EESHIVRVINKLKEYVERIGSSQDICS SYLLLLIEYVYKYDRNTAEGAVAEKTSDE
EPETEESLDSTQLMSTLCQYIYTKDSSDRIRTRAILHHIYHSHLDRWYEARDLMLM
SHLQETINYSVPTQIAYNRTMVQLGLCAFRQGLMREAHNALVDIQSTGRAKELLAQ
GLLLQRQGERISPEQEKVEKRRQIPFHMHINLELLECVYLVSAMLLEIPYVAHEFD
ARRRMI SKQFHHQLRVSERQSLGPPDNMREHVVA AAKALKMGDYEECLGFI INEKM
NNKVWNLF SKSVESRRGSSGVNSHGGEVAGGNSHGK"

```

ORIGIN

```

1 ATCTGAATTT GACTATCGCG TTATGTATCT GATTCTAGAA TATGTTTCTT TTTTGATATC
61 ATAGTTACAA CTTCTTTTAA CGTCAGACAC CCAGAAGTCA CGTGGTTTTT CACGGCGTGTG
121 TTCAGAAATT CACGTATTCT GTTAGTTGGT TTAATTATCA AGGTTTAGAG TACAGTAGAT
181 GTTTTATTTA CTTCAACTAT ATGTAGAAAT AAACGTTTTA TTGCGTTAGC TG TAGTAGTT
241 TTACCCAAAA CGTCTTTTAA ATATTACGGC GTATTGCATA TACTAACAGA AAGAATAAGA
301 CAATGTCTTG TAGAGTGAAC TAAA ACTATG TCTGGCAAAT AAAATGAATG GTTAACATAG
361 TATGTTAGGT GGCCATATTG TTAATATTTG GCCTATCATA CCTATTATAA TTCCACCTTG
421 GGTATTAATT GTTTTTCCAA TCACAGCACT GCAAGCCAAT ATAAGATTCT TTGCTGAGTT
481 CTGTTGAACA TAAACAAGTA TGTC AAAGTT CTTTGCTGCT GAATCAAGCA GTGATACGGA
541 TGTTTCATCC TCCTCGGAAG ATGAGACCCC AGCACCTTCA AGGTCTTCAA GAGCAACAGT
601 CCAGCGACAG TTTCTTCTAA GTGATGATGA AGAAGAGGTC CAGCATGTTG TGAGGAGTGC
661 TAAGGAGAAG AGATGGGAGG AGCTACAGAA CATCATTAAAG CTGATGAGAA ACGCAAGGAA
721 GATCAAAGAC ATGTCGAAGC TGATGGACGA GTTTGACAAT CTCTGCAAGT TGTATATCAA
781 ATCAAAGACG GTTGTGTTGA AGGAAGGAAT TCCAAGGTTT TATATTCAA ACCTGGTGGA
841 GACTGAAGAC TGCATCACTG AGCTGTGGCA GGATAAGGAG GGAAGGAAAA AGATGAGCAA
901 GTTGAATTCA AAGAGTCTTG GAGCTTTGAG GCAGAAGCTG AGGAAATATC TGAGGGATTT
961 TGAAAAAGAA GTGGAGGATT ACAGACTGCA TCCTGATGAG GAAGAAGAGC ATGTTCCAGA
1021 GAAGCACGTG GAGGAAAATG ATGCTCCAAC ATTTCTTGGT TCTCCTGTAA AAGTTGCGCA
1081 ATTTGAGAAA CCCGAACCTT TGCAGGATAA AGATGACGAT AGTGATGACT CTGACTGGGG
1141 GTTCGATGAT GATTCAACCT CAGATGAATC GGATGAGGGA GGTATCGGAG CGAGGCAACT

```

1201 CACTGCTGAT TATTTCTTAA AAAAGACCGC CGGAAAAGAT GATGAAAAGT CAAAGAAAAA  
1261 GGAGCGAGTG CAGCAATCGA AGAGTAAAAA GAAGACCGAT GATGACTGGG AGGAGGTTAA  
1321 AGGAGGTGGA AAAGTCGCTA AAGTCACAGC TCTGTTTGAG AAAGGAACTG AGATCACCCA  
1381 TCCTGTGGTT ATGAAAAAGT TGAACGAAAT CATCCTGAAT CGTGGTCGAA GATCTACTGT  
1441 TAGAAAAGAT CAATTTGATT TGTTGAAACA ACTGCGGCAA ATAGCTGAGG AAAATAATTT  
1501 AGGAATTGCT TTAAGTGTTC GCCTTACATT TGACATCATT GCTTCTTTGT TTGATTATAA  
1561 TTCCAAAATA CTAGACTGCA TGAAATCTGA ACCATGGGCA GAGGTGTTAA AGTATGTGGA  
1621 AGAAGTATTG GATCTACTAC AAGAAAATCC AGACATCGTG GTGGCCGAAC ATATTTTACA  
1681 GGAGTCTGAG AATGTTTCTG ACAAAGAAGC AGGTTATAGA CTTTGTGGAA GTCCAGTCAC  
1741 TCTTGTGGAG AAACACTACA GCGAGTATAT TAAGATCTTG CAAACTGCAG ATGCTCATT  
1801 AACTGATTAT GTGAAGCATT TACGTGAAGA AAGTCACATT GTACGTGTGA TCAACAAGCT  
1861 AAAGGAATAT GTGGAAAGGA TTGGAAGCTC CCAGGATATC TGCAGTCAT ATTTGCTGCT  
1921 TATTGAATAC GTGTATTACA AGTATGATCG CAACACTGCA GAAGGTGCGG TTGCAGAAGA  
1981 GAAAACCTTCT GATGAGGAAC CAGAAACAGA AGAAAGCCTG GATTCAACTC AGTTAATGAG  
2041 CACGCTATGT CAGTACATAT ACACAAAAGA TTCATCTGAC AGAATTGCGA CAAGAGCCAT  
2101 TCTACATCAT ATCTACCATC ACTCACTACA TGATCGCTGG TATGAAGCAA GGGATTTGAT  
2161 GCTCATGTCT CATCTACAAG AAACCATCAA CTAAGCAGAT GTTCCAACAC AAATTGCATA  
2221 CAATCGCACA ATGGTTCAGC TAGGCCTTTG TCGCTTCAGG CAAGGTTTGA TGCAGAGGC  
2281 TCACAACGCT CTAGTTGACA TACAATCTAC TGGAAGAGCA AAAGAATTAC TTGCACAAGG  
2341 CCTGCTTTTG CAAAGGCAAG GAGAGAGAAT CTCACCAGAG CAAGAAAAGG TGGAAAAGCG  
2401 TCGGCAAATT CCCTTTTACA TGCATATTAA CCTGGAATTG CTGGAGTGTG TATACCTGGT  
2461 GTCTGCAATG CTGCTTGAGA TACCATATGT TGCTGCACAC GAGTTTGATG CAAGAAGAAG  
2521 AATGATTTCC AAGCAGTTTC ACCACCAACT TCGAGTCAGT GAACGGCAAT CTTTGCTTGG  
2581 GCCACCAGAT AACATGAGGG AGCATGTTGT AGCAGCCGCA AAAGCCTTGA AGATGGGTGA  
2641 TTATGAGGAA TGCCTCGGTT TCATTATTAA TGAGAAAATG AACAACAAAG TGTGGAACCT  
2701 GTTTTCAAAA AGCGTTGAAG TTAGAACCAT GCTTGAAAACA AAANNNNNNNN NNNNNNNNNN  
2761 NNNNNNNNNN NNNNNNNNNN NNNNNNNNNN NNNNNNNNNN NNNNNNNNNN NNNNNNNNNN  
2821 NNNNNNNNNN NNNNNNNNNN NNNNNNNNNN NNNNNNNNNN NNNNNNNNNN NNNNNNNNNN  
2881 NNNNNNNNNN NNNNNNNNNN NNNNNNNNNN NNNNNNNNNN NNNNNNNNNN NNNNNNNNNN  
2941 NNNNNNNNNN NNNNNNNNNN NNNNNNNNNN NNNNNNNNNN NNNNNNNNNN NNNNNNNNNN  
3001 NNNNNNNNNN NNNNNNNNNN NNNNNNNNNN NNNNNNNNNN NNNNNNNNNN NNNNNNNNNN  
3061 NNNNNNNNNN NNNNNNNNNN NNNNNNNNNN NNNNNNNNNN NNNNNNNNNN NNNNNNNNNN  
3121 NNNNNNNNNN NNNNNNNNNN NNNNNNNNNN NNNNNNNNNN NNNNNNNNNN NNNNNNNNNN  
3181 NNNNNNNNNN NNNNNNNNNN NNNNNNNNNN NNNNNNNNNN NNNNNNNNNN NNNNNNNNNN  
3241 NNNNNNNNNN NNNNNNNNNN NNNNNNNNNN NNNNNNNNNN NNNNNNNNNN NNNNNNNNNN  
3301 NNNNNNNNNN NNNNNNNNNN NNNNNNNNNN NNNNNNNNNN NNNNNNNNNN NNNNNNNNNN  
3361 NNNNNNNNNN NNNNNNNNNN NNNNNNNNNN NNNNNNNNNN NNNNNNNNNN NNNNNNNNNN  
3421 NNNNNNNNNN NNNNNNNNNN NNNNNNNNNN NNNNNNNNNN NNNNNNNNNN NNNNNNNNNN  
3481 NNNNNNNNNN NNNNNNNNNN NNNNNNNNNN NNNNNNNNNN NNNNNNNNNN NNNNNNNNNN  
3541 NNNNNNNNNN NNNNNNNNNN NNNNNNNNNN NNNNNNNNNN NNNNNNNNNN NNNNNNNNNN  
3601 NNNNNNNNNN NNNNNNNNNN NNNNNNNNNN NNNNNNNNNN NNNNNNNNNN NNNNNNNNNN  
3661 NNNNNNNNNN NNNNNNNNNN NNNNNNNNNN NNNNNNNNNN NNNNNNNNNN NNNNNNNNNN  
3721 NNNNNNNNNN NNNNNNNNNN NNNNNNNNNN NNNNNNNNNN NNNNNNNNNN NNNNNNNNNN  
3781 NNNNNNNNNN NNNNNNNNNN NNNNNNNNNN NNNNNNNNNN NNNNNNNNNN NNNNNNNNNN  
3841 NNNNNNNNNN NNNNNNNNNN NNNNNNNNNN NNNNNNNNNN NNNNNNNNNN NNNNNNNNNN  
3901 NNNNNNNNNN NNNNNNNNNN NNNNNNNNNN NNNNNNNNNN NNNNNNNNNN NNNNNNNNNN  
3961 NNNNNNNNNN NNNNNNNNNN NNNNNNNNNN NNNNNNNNNN NNNNNNNNNN NNNNNNNNNN  
4021 NNNNNNNNNN NNNNNNNNNN NNNNNNNNNN NNNNNNNNNN NNNNNNNNNN NNNNNNNNNN  
4081 NNNNNNNNNN NNNNNNNNNN NNNNNNNNNN NNNNNNNNNN NNNNNNNNNN NNNNNNNNNN  
4141 NNNNNNNNNN NNNNNNNNNN NNNNNNNNNN NNNNNNNNNN NNNNNNNNNN NNNNNNNNNN  
4201 NNNNNNNNNN NNNNNNNNNN NNNNNNNNNN NNNNNNNNNN NNNNNNNNNN NNNNNNNNNN  
4261 NNNNNNNNNN NNNNNNNNNN NNNNNNNNNN NNNNNNNNNN NNNNNNNNNN NNNNNNNNNN  
4321 NNNNNNNNNN NNNNNNNNNN NNNNNNNNNN NNNNNNNNNN NNNNNNNNNN NNNNNNNNNN  
4381 NNNNNNNNNN NNNNNNNNNN NNNNNNNNNN NNNNNNNNNN NNNNNNNNNN NNNNNNNNNN  
4441 NNNNNNNNNN NNNNNNNNNN NNNNNNNNNN NNNNNNNNNN NNNNNNNNNN NNNNNNNNNN  
4501 NNNNNNNNNN NNNNNNNNNN NNNNNNNNNN NNNNNNNNNN NNNNNNNNNN NNNNNNNNNN  
4561 NNNNNNNNNN NNNNNNNNNN NNNNNNNNNN NNNNNNNNNN NNNNNNNNNN NNNNNNNNNN

```

4621 NNNNNNNNNN NNNNNNNNNN NNNNNNNNNN NNNNNNNNNN NNNNNNNNNN NNNNNNNNNN NNNNNNNNNN
4681 NNNNNNNNNN NNNNNNNNNN NNNNNNNNNN NNNNNNNNNN NNNNNNNNNN NNNNNNNNNN NNNNNNNNNN
4741 NNNNNNNNNN NNNNNNNNNN NNNNNNNNNN NNNNNNNNNN NNNNNNNNNN NNNNNNNNNN NNNNNNNNNN
4801 NNNNNNNNNN NNNNNNNNNN NNNNNNNNNN NNNNNNNNNN NNNNNNNNNN NNNNNNNNNN NNNNNNNNNN
4861 NNNNNNNNNN NNNNNNNNNN NNNNNNNNNN NNNNNNNNNN NNNNNNNNNN NNNNNNNNNN NNNNNNNNNN
4921 NNNNNNNNNN NNNNNNNNNN NNNNNNNNNN NNNNNNNNNN NNNNNNNNNN NNNNNNNNNN NNNNNNNNNN
4981 NNNNNNNNNN NNNNNNNNNN NNNNNNNNNN NNNNNNNNNN NNNNNNNNNN NNNNNNNNNN NNNNNNNNNN
5041 NNNNNNNNNN NNNNNNNNNN NNNNNNNNNN NNNNNNNNNN NNNNNNNNNN NNNNNNNNNN NNNNNNNNNN
5101 NNNNNNNNNN NNNNNNNNNN NNNNNNNNNN NNNNNNNNNN NNNNNNNNNN NNNNNNNNNN NNNNNNNNNN
5161 NNNNNNNNNN NNNNNNNNNN NNNNNNNNNN NNNNNNNNNN NNNNNNNNNN NNNNNNNNNN NNNNNNNNNN
5221 NNNNNNNNNN NNNNNNNNNN NNNNNNNNNN NNNNNNNNNN NNNNNNNNNN NNNNNNNNNN NNNNNNNNNN
5281 NNNNNNNNNN NNNNNNNNNN NNNNNNNNNN NNNNNNNNNN NNNNNNNNNN NNNNNNNNNN NNNNNNNNNN
5341 NNNNNNNNNN NNNNNNNNNN NNNNNNNNNN NNNNNNNNNN NNNNNNNNNN NNNNNNNNNN NNNNNNNNNN
5401 NNNNNNNNNN NNNNNNNNNN NNNNNNNNNN NNNNNNNNNN NNNNNNNNNN NNNNNNNNNN NNNNNNNNNN
5461 NNNNNNNNNN NNNNNNNNNN NNNNNNNNNN NNNNNNNNNN NNNNNNNNNN NNNNNNNNNN NNNNNNNNNN
5521 NNNNNNNNNN NNNNNNNNNN NNNNNNNNNN NNNNNNNNNN NNNNNNNNNN NNNNNNNNNN NNNNNNNNNN
5581 NNNNNNNNNN NNNNNNNNNN NNNNNNNNNN NNNNNNNNNN NNNNNNNNNN NNNNNNNNNN NNNNNNNNNN
5641 NNNNNNNNNN NNNNNNNNNN NNNNNNNNNN NNNNNNNNNN NNNNNNNNNN NNNNNNNNNN NNNNNNNNNN
5701 NNNNNNNNNN NNNNNNNNNN NNNNNNNNNN NNNNNNNNNN NNNNNNNNNN NNNNNNNNNN NNNNNNNNNN
5761 NNNNNNNNNN NNNNNNNNNN NNNNNNNNNN NNNNNNNNNN NNNNNNNNNN NNNNNNNNNN NNNNNNNNNN
5821 NNNNNNNNNN NNNNNNNNNN NNNNNNNNNN NNNNNNNNNN NNNNNNNNNN NNNNNNNNNN NNNNNNNNNN
5881 NNNNNNNNNN NNAGTAGCCG GGGGAATAGA CACAGAGAGG AAGTAGCCGG GGGGATGGTC
5941 ATGGGGGGGA AGTAGCCGGG GGGATAGTCA TGGGGGGAAG TAACGGGGTG CATAGACACG
6001 GAGGGGAAGT AGCCGGGGAG AATAGTCATG GGGGGAAGTA GCCGGGGGGA AATAGTTGCC
6061 GAGGGGAAGT AGCCGGGGGG AATGGTCATG GGGAGAAATA GCGGGGAAA GTCATGGGGG
6121 GAAGTAGCCG GGGAAATAGT CATGAGGGGA AGTAGCCGGG GGGAATGGTC ATGGGGGGAA
6181 GTAGCCGGGG GGAATAGTCA TGGGGAGAAA TAGCCGGGGG AACGGTCATG GGGGGAAGTA
6241 GCCGGGTGAA ATAGTCATGA GGGGAAGTAG CCGGGGGGAA TGGTCATGGG GAGAAATAGC
6301 GGGGGGAATA GTCATGGGGG GAAGTAGCCG GTGAAATAG TCACGAGGGG AAGTAGCCGG
6361 GGGGAATAGT CATGGGGGAA ATAGCCGGGG GAACGGTCAT GAGGGGAAGT AGCCGGGGGA
6421 AATAGTCATG GGGGAATAG TCACGGGGGA AAGTAGCCGG GGGGAATGGT CATGGGAAA
6481 TTAGCCGGGT GAATAGTCAC GGAGGGGAAG TAGCGGGGTG AATAGTCATG GAGGGGAAGT
6541 AGCCGGGGGG AATAGTCATG GAGAGAAATA GCCGGGGGAA TGGTCATGGG GGAAGTAGC
6601 CGGGTGAAT AGTCATGGGG GAAGTCGGGG TGAATAGTCA TGGGGGAAGT AGCTGGGTGA
6661 ATAGTCACGG AGGGAAGTA GTGGGGGGGA ATGGTCATGG GGGAAATTAG CTGGGTGAAT
6721 AGTCACGGAG GGAAGTAGC TGGGGAAAAT AGTCATGGAG GGAAGTAGC CGGGGGGAAT
6781 AGTCATGGGG GAAAGTAGCC GGGTGAATAG TCACGGAGGG GAAGTAGCCG GGGTGCACAG
6841 AATACGGGGG GAAGTAGCCG GGGGAATGG TCATGGGGGA AGTAGCCAGG AGGAATGGTC
6901 ATGGGGTAAG TAGCCGGGGG GAATGGTCAT GGGGTAAGTA GCCGGGGGAA TGGAATGGG
6961 GGGGAAGTAG CCGGTAGGAA TGGTCATGGG GGAAGTAGCC GGGAGGAATG GTCATGGGGG
7021 AGAAGTAGCC GGGTGCACAG AATACGGGGG GAAGTAGCCG GGGGAATGG T

```

//

```

LOCUS      1      1466 bp      DNA      linear PLN 25-FEB-2004
ACCESSION  1
VERSION    GeneMark.hmm v3.0 self_training
ORGANISM   C.reinhardtii
FEATURES   CHR ---
           CDS      complement(join(500..508,687..786,905..966))
           /translation="MGHNDVWNSHPKGYGQGSRHCRCVNNNHALIRKYGLNICRQCF
           REKAADIGFVKYK"
ORIGIN
1 TCGCCTGCAG CTGCACTCCT CCGGCACCAA CCCGCCCGGT CGGCAGCAGC CCGGCGCGCC
61 GCACCCGCCA GGTCCGCTGA GGGCAGCTCT CGCGACTGCG CACTCTCAC GCCGCACCCG
121 CCACCCGCCG ATTGTAAACG CCTGGGCCTC GCCGTGCCGC CGCCAGGGCT GTCGCTGCTG
181 CTGCTGCTCC TGCTACGCTC ACCCGCACCT GCTTGTCTGC TCCCGCCCA GCCCGATCCA

```

```

241  AGGGTGCCGT  ACTCACCTGA  TCCATTGCTT  GCTGCTAGCT  GTGCTGCTGC  CTGGTGGTCC
301  ACCAAGTACA  ATGCACGAAG  CTGCTCGGCC  CTGACCTGAT  GCTGCATTGC  GCTGCGCTGC
361  CTGATGTGGC  CAATCTGTTT  GCGGTGCTGC  TCTGGCGCTA  ATGCGTGTGG  GGCCTGGTTC
421  GAGATTCCGG  ACACGTCCGG  TCAACGCCTC  AGCACCTTAC  AAAGTCCCGT  GTGAGCTAGA
481  TACCCAACAT  TCGGGCATT  TACTTGTACT  GCGTGGGGCA  AGGAAACAAG  CACAGGGAGC
541  ACACGGTTAG  TCCAGTATGT  GATACCCCGG  GGCCAGCCG  AATAACGGGA  GGGGGGGGCG
601  GACCTGGGGT  CGCCCGCTCC  CGGCAGCCTA  CCCGCCGGCC  CCATACCGCG  GCCCAGCCAG
661  CCAAGCCCTC  CCCGCGCAGC  ACCTACCTTG  ACGAAGCCGA  TGTCAGCGGC  CTTCTCGCGG
721  AAGCACTGAC  GGCAGATGTT  CAGGCCATAC  TTGCGGATGA  GCGCGTGGTT  GTTGTGTCAC
781  ACACGGCTGC  GGCAACACAA  TCAGATATCA  GCAAAATTTT  GCCGTTTGTG  ACAGCTCGGG
841  ACGCTAATCG  GGACGTGCGG  CGTCCCAGCC  TGCGCCGGCG  CTGCATCGGC  TGCCCCCGGC
901  TCACCAATGG  CGCGAGCCCT  GGCCGTAGCC  CTTGGGGTGG  CTGTTCCAGA  CGTCGTTGTG
961  GCCCATGTTT  GCAGGTTACA  GCTGCCTGAC  CTGCACAAAA  AGACCCCTCG  TTTCAGGCGG
1021  CAGTCGGAGA  TTGCTAGCCA  AGCCGAGCAG  CGCTCAGTTC  CACACCCACC  AGGACAAGAG
1081  CACGTTGGGC  ACTAGGCGCG  CGAGAGGGAA  AGAGACTGTG  CGTGAGCCCG  CGTTTGGGCA
1141  AGCGCCGACC  ATGTACGGCG  GCGCCATTG  CGAATTCTCC  TTGTGCAGAA  AGCCACCCTG
1201  TAAATTCTCA  GGATATAATG  AGCTTAGTTC  AATGCCCAAG  AATTTTCCCT  GCGCCACATA
1261  TGTTGCCGCT  GCCGCGAGAA  ATGTCCCACA  ACATTTTGTG  CGCTCACTTC  AGCCCGGGCA
1321  CGTTGTCAAG  GTGCTTCAAT  GTTTTGTCCA  GTACACGTAT  CCACAACTG  AATACGCGCG
1381  GCGGCTCGGT  GTCACGGCAC  GCTCACAGCG  CATCCCCGGG  CAGGCGGTGC  ACCTCTCTGG
1441  CGTGCGTAGC  AAACCGAAAG  CAGCCC

```

//

```

LOCUS       2             1434 bp       DNA           linear PLN 25-FEB-2004
ACCESSION  2
VERSION     GeneMark.hmm v3.0 self_training
ORGANISM    C.reinhardtii
FEATURES    CHR      ---
            CDS       complement(join(500..640,881..934))
            /translation="MYLMYDAGNRVYTLKKIAPDGTPTKSAHPARFSPDDKFSR
            ERITCKKRFGLLPIQKPPPEL"

```

ORIGIN

```

1  TTCACTCAGA  CCAACATGAA  CCCGGTCCCT  TGTCGGGGGC  CCGTAGCCCG  AGCCTAATAC
61  CGCTCCGCCA  CCGGCCAAA  CCTCTGCGTG  CCATTCCCTAT  CCGTCTCCTC  AGGGGCCCGT
121  CGTATCCTCC  GTCGCGTCTG  CAGGGACAGT  GCCCTGCACG  CCACCGTAAT  CTGGCTGGCT
181  ATCAAGCAGC  CAACACCGAA  TAAGAAGTAA  AGCAATCCCA  CTTGCGCTCG  CGTTCCACT
241  GCGCGGCGGC  AAGCTATCAC  CCGTCAAGGG  CTGGGGACCG  CGGCATTCAT  GCAACTAGAC
301  AGGCGTCGCG  GTGACAGAAG  CACCCTCGCG  CGCGAGACAG  ACGTCACGAG  ATGTGGAGCT
361  GACCTGCAAC  CCCGCACACT  TGCCCAGTGC  GACACACGCA  CACACACGAA  ACACACCCAC
421  GCGTCGTCTA  CCCACGCTCC  TCCCTATCCC  CAACATCTAG  TACAATGATA  CACTCCACGC
481  CATGTCGCCG  TCATGTTGCT  CAAAGCTCCG  GAGGGGGCTT  CTGGATCGGC  AGCAGGCCGA
541  ACCGCTTCTT  GCAGGTGATG  CGTTCCCAG  AGAAGTTGTC  ATCCGCGCAG  AAGCGAGCTG
601  GGTGCGCCGA  CTTGGTCGGA  GTGCCGTCAG  GCGCAATCTT  CTGCAAGGTG  CATAAACGTA
661  GGCGGGTTAA  CATGATGCGC  AGCAGCAAAA  GAGAAGGCGG  CTCGGTAGCG  CCGGCATGGC
721  GAACCCCGTT  CCAGGCGGCC  ATGGCTCATC  CCCATCATCA  CAGCTCCATT  TAGTTATCTC
781  TACTTGATGC  TTATCGCTGA  CAAGGACGAA  GCTGGGCTGC  ATGGGTTGCG  GCCGGCGGCC
841  CGTTCTTTTC  CGACACCCGT  TCCCACGCC  CGCTATCCAC  CTTGAGAGTG  TACACGCGGT
901  TGCCCGCATC  GTCGTCGTAG  TACATCAGGT  ACATGGTTGC  TGAGTGGCAA  AGTTTAGGCG
961  ATGGAGAGTG  CTCAGTCGGC  TCAGACAGCA  AGCGCTAGGA  ATCGGTCAAG  TGATAGTAAT
1021  CCTGAGTGCA  GGTGACTGTG  GCTATAGACG  TAGAGCCTGA  AGAAGTTTTG  CTTGGCCCGA
1081  TTTCCGTCTG  GAACCCATCC  TGAATGAAAC  GTCACTTCCT  GACCTTTCGT  GAGCGTCAAG
1141  GTCCACACAG  ACCATAGATA  TTTATCAGCA  GCTGATATAT  AGCTCAACTG  GGAAGACTTA
1201  CACACACAGC  TGTCGCTCGC  TCGCTCAGCC  TTCCACACAA  TGCCCGCAGC  TGGGACTGCG
1261  CCTGCTGATG  CCATGCAAAT  AGAAGAAAAC  TCAGGGAGCC  AGGAAGGGAA  CGAGGAGGTT
1321  CAGCAAGAGC  AAAATACCGG  GTCGCCGAGC  AACCTTGGGA  CGGAGACCGT  GCTTCAACGA
1381  AGCGCCCTGC  CCCGGATGGC  TCTTCTACAA  GAGGCATTTC  AGAAGGCGCT  GGAG

```

//

LOCUS 3 1586 bp DNA linear PLN 25-FEB-2004  
ACCESSION 3  
VERSION GeneMark.hmm v3.0 self\_training  
ORGANISM C.reinhardtii  
FEATURES  
CHR ---  
CDS join(500..601,696..770,994..1086)  
/translation="MSYDEVEIEDMTWNEKLQAYTYPCPCGDLFQITLLELRAGEEI  
ARCPSCSLYITVIYDPEDYENAEPPTRGTD SKVPSAAPQPSEVEVH"

ORIGIN

1 TGCGGGCCGT GTGCCCGTGT CCGGGCTTTG GGGAAGGCAT GTGCCCAAAT TTGCTGTCCA  
61 GTCGTGCGGC CCCTCTCCTT CAATCTCTCG AACGCCATCG TTGCTAACGG TTCAGGCCAC  
121 CACTAGCAGC TCAGCAACCC GTCTGTGACG TTTGAGCTAC GTACTCGATT TCCC GCGGTT  
181 CCTTGCCACC GCTCGTCCGC ATGGGTGTGC GACCTTTCGC CTTTCTGCCC TTTCAGTACC  
241 CTTGGTCCGC CATCTAAAGA CTTATCTGTG CGAAGCGCAT ACAACTTAAA CTCTAACAGG  
301 TCCTATACTA ACTTTTCCAC CATCGCTGTT TGGGCGATTG TTCTCTGGCC TGTTCTCTGG  
361 CCGCTGACTT TGCCTGCGCT ATACGCAAAC AAGCAAACCA AACGACTTAG TCGCTGATAT  
421 TCCATTGGGC CGCCCGCCGC ATTAGGTAGC CAGTCGCTCT AGACGCGCCA GCCAGCAGTG  
481 CAGGCGCGAG CCGCTAAAAA TGAGCTATGA TGAGGTGGAG ATTGAGGACA TGACGTGGAA  
541 CGAAAAGCTG CAAGCGTACA CGTACCCGTG CCCATGCGGC GACCTCTTCC AAATTACCCT  
601 GGTAAGCGCC GCCCTTGTCG CGTTCTCTAA CTTTACCTGA TGATGGGCAA TACAGCTGTG  
661 TAAGGATGAT GATTTGGGCA TAACACACTG TCCAGGAGGA GCTGCGAGCA GGCGAGGAAA  
721 TTGCCCGATG CCCCAGCTGC AGCCTCTACA TCACGGTCAT CTATGACCCG GTGAGCCCTG  
781 CGGACAGGGT CTTGCTCTGA CTAGGGATCT AACTCAGGAG GGATGCAATA TGGGAATTGC  
841 ACTGGCGTGA GACGGGCTGC ACGGTTCAAG GAGTGGGGCT GGTATGCACG CCGGTGGCAC  
901 GCTGGACTGA CTGAGTCTTC TTGACGCTTG CGGTGCTTGG GTTCGTGATG GCTTTTTTAC  
961 TGATAGGAAC GGCCCTTGA ATTACGTTG CAGGAAGATT ATGAGAACGC AGAGCCACCA  
1021 ACGAGAGGAA CCGACAGTAA AGTGCCTTCG GCGGCACCTC AGCCTTCTGA GGTGGAAGTC  
1081 CACTGATGAC ACGGAGTGCC TGCTAGGCCG ACGAGTTCGG TGTAGTGGGG CGTGCTGGAT  
1141 GCATCAAGCT GCGCATCAAT GCGGCTGAGA GTTGCAATGC CTCTGCAGTT TGAGGCACTA  
1201 TGAGCTCAAC GTGCAGCACG TGGTTGCGTG CAAGGCTGCG TGCGACCCCA CTAGCGCACG  
1261 AGACGTGTCA CAGCAAGAGA CTGAAAGCAT GTTATAGCAC TTCCAAGTGG TTGCACTGGC  
1321 CTGACGCGAT TGTGCATGCT TGGACGGCGT CACATTGCGA GTTGTGGGAT AGAAATGCAG  
1381 GATGGCGAGC CGCATCACTT CTGGACGGCG GGCACCTAGC ATGGGGTCCG GAGTGATCGC  
1441 ACTGCGCATG CATTGCTT GAGCGACGGT TGTAGCAAGG GACGAGGTTG AGCTGAGCGA  
1501 GGAGGGGCTG TCATTTTGTT AGGCGGGGGC GCGGAGCAAT CCACCCACTG CACGCGGGTA  
1561 GGACAACATC AAAGCGAAGT ATGTAG

//

LOCUS 4 1799 bp DNA linear PLN 25-FEB-2004  
ACCESSION 4  
VERSION GeneMark.hmm v3.0 self\_training  
ORGANISM C.reinhardtii  
FEATURES  
CHR ---  
CDS complement(join(500..517,868..933,1023..1114,1197..1299))  
/translation="MAGSQSQASTLVARGGRSSNAPTGAAGALRRRPVRGSGGSGT  
TKAQQAAMNFYTDDTPGWKMSPVVITMSLSFIAFVTILHVVGKFKAA"

ORIGIN

1 CCGGTGCTTC TCCTCTACCA TCTCACGCGG CACACAGGTG CTTTACGGCA ATGTAATGAC  
61 CGGCTGATAC TTCTCTCCAC CATTCCGTGC TTGTTTCGCC ATGCGTCCAC ACGCTTTGTG  
121 GGGCTGATCG TGTCGGTAGC CTCATGTTAC ACCAAAAGGC CAAGCGCGCC CTGCTTTCAT  
181 GGCCACACCC ACCACACCGT CCGAGCTACA GCCTCCTATC GCGTGCCAAC TATGCGTCCA  
241 CCGCCCGCCC CTGCCACCTG GTAGCGAAAT GCGCCACGCC TAGTTAATCA TCACACATGC  
301 AAGCCTATCT GCTTTACCCG ACATCCACCG TCACCACGAA CTCACATCGT GCGCAGCCTT

```

361 TGAAGCGTGT GCGACGTCAA CAGTCCTGTC TGTGTCTAGT GCAGCAGCAA TCCGCTGCTT
421 AGGTCAAGGT CCAGTGCTAT CCGTTGAATT CAATGCTGCA GTTCTCATAT GTTTGCATCG
481 CCGTCCCCTG GCAAGGTTCT TACGCGGCCCT TCTGGAAGT GGGGTACAAG GGAAACGACG
541 TGTAGCGGGA AGGCAGGTTT AGTCAAGGTC GCTTCCGCGG TGTAGTCAGA ACTATCAGTT
601 CTAGGCGTGA GCGGCTCTC GCACCTACGG GCCTGGCCCG TCCCATGTAT CCGGCTCCAC
661 TCTACCCAGT ACCCACGCAG TGGCAAGCAC GAGCCCGAGG TGTTGATGGT TTTATCCCGC
721 GCGCGCGCCC GTGTAATAA CCGGTCCTCC GCTACGGTCC CAGCTTGCCA CCACATATTT
781 CCTCTGCTAC CTCCCTGCTG TGCTCCAGCA TGAGCACACC ACGCCCGGGC CTTGCCCGGT
841 GTCACCCACA CCTGTGCACC CACGCACCTT GCCAACGACG TGCAGGATGG TCACGAAGGC
901 GATGAAGCTC AGGCTCATAG TGATCACACC CACCTACACA TACAAGCGCG GAGCTGTTAG
961 TTGAGAAGCT GGGCAACGAA GCCGGCAAGC AGCAGATCGA TGCCACCGTC GCGCGCCCTC
1021 ACCGCGGACA TCTTCCAGCC GGGAGTGTG TCCGTGTAGA AGTTCATGGC TGCTTGCTGG
1081 GCCTTGGTCG TGCCGCTGCC ACCGCTGCCG CGAACTGCAA GGGCGAAACC CGAAACTCAG
1141 CGACTCGGCC AAGAAACATG CGTGTTGCTG TAGCGAGACC ACCGCGCCGT TCGCACCTGG
1201 CCGCCGGCGC AGAGCACCCG CCGCTCCAGT AGGAGCATTG GAGGAGCTGC GGCCACCGCG
1261 GGCCACCAGA GTAGAGGCCT GAGACTGAGA ACCGGCCATT GTGATCTGGT CTTTTAACAC
1321 AGAGGCTAGT CGAGTTGGGT GCAGCTAAAA GCCTTGGTAA TCGCTTGTA TAATGTCTGT
1381 AGGAACGGTG GATGGCCCAG CAGCTTTTGT GTGAGTTCGA CTGCTTCGCT ACATCGCTGT
1441 CCCCATTGC GCGGCCCATC CCGGGCACGG TGTCCCCCG ACTTGCACTG TGACCAGGCG
1501 CTTTACGCT CAGCAGCTTT TTGATAAACT CTCAATTTT AACGCTTTAT TCATAAATAC
1561 TTACAGTACG CGGTATGGCG CGACAGGTGC CCGCTCGCGT GCCACACGCT ACATACCCAA
1621 TACTGGAACC GCCAGCTGCG CCCCCCACG CTCCTTACC CCGAAAGCCT CCCTCCCGCT
1681 CTTTATCCAT TCAAAGCCTT ACCAAAACCC TGGCGAGGCA CATGTCGTAG ATGCCGCCGG
1741 TAGCGGTTGG GTGATTGATT GGAACCGACG CCTTTTTTTG CAGCGGCAGA TCAGCAGCG

```

//

```

LOCUS          5      2039 bp      DNA      linear PLN 25-FEB-2004
ACCESSION      5
VERSION        GeneMark.hmm v3.0 self_training
ORGANISM       C.reinhardtii
FEATURES
  CDS           join(500..574,848..904,1112..1204,1459..1539)
                /translation="MDIAFAVVTTAGGVMGYVKKKSLPSLLGGLAFGAAYGATAWTI
                QNHDAYVGH TVGAATSAVMATMMGLRLAKTKKVMP SGILTGLGLLGLLYHANKARQW
                A"

```

ORIGIN

```

  1 AGCAACGTTT CTGTTTGTG CTGCCTCCTC CGTGCAAGCC CAGCGCTTGG GCCCCGCGCG
 61 CGCATAAGCA GAAGCGGGGT CAGCCGGTCA CTGTGCGCAA CTCACGACGT CGTTATTGTG
121 CTTTGCATCG CCCGCATATC GCACGGTGAG CTTGTCTTTC AATTCAAGGC CGTGCCCTTG
181 GCGGGCTGAA TTCAGAGCGC TCGGCAGTGG TTCAAGCGAC CCCATAATTG CTAGCTCAAA
241 AACATCATAT ACTCATACA GCGACAATAC GAAGCTTGCA ACGGCCTGAG GGAAGCTAC
301 ATCATGCATA AGCTTTGCGC ATCAGTTCCC GATTGGTGAT CCTGAACCGG AACCCAGTAA
361 TTACTTGCCA AACTTCACAT TTGCTTGTAG TTCTGCAGTC TGAAATTCAT CAAACGCCAA
421 AACTACTTTG TCTTGTGAC GCTGCAACAC CTATCGGCTA TCGCACCTCA GTAGGATGGC
481 TCCTTCAGGA GAGGTGCACA TGGATATTGC CTTCCCGGTG GTGACTACAG CGGCGGCGT
541 GATGGGCTAC GTGAAGAAGA AGTCGCTGCC ATCGGTAGGT GCAGATGTC AGGTGTGGGT
601 ATGCTGTGGT GGACGGGTCA AGGTGCACCG CGGTTTCAAGT TCGACTTCGG CATGTTAGCT
661 GGAGTCTCAA TTGCTCGGTT TGGGGGAGCG TAGGGGTCAT GATGTCGGCC TTGGGGCAAT
721 TGAGGCTGCG TGGCTGCGTG GCACGGCTGT GTGGTACAGT GTTGGTATGT AAAGGGGCC
781 AAACGCCCCG GTAGCATCAT TACATAGTAT TAATCTGTAA AGCTGTGTAC AATCTGCTTG
841 CGCGCAGCTG CTTGGTGGCC TGGCTTTTGG TCGCGCGTAC GGGGCCACCG CCTGGACCAT
901 CCAGGTGGGC ATCCGGTGCC GCGCCATGTG CACTGCGCTC GTGTTGGCAG GGCACGCAGC
961 CAAGCAGCCA CGCAAGGGGG ATGGTGGGAA TGAAAGGGCC CGCTTGCAGT GCCGATCCCC
1021 GCGCCGAGTG CCGCTCCGTG CGTCGTCAGC AGCCTTGACG TGGCAACCGC AATGTCTATC
1081 CACGAGGTGG CTTGGTTCGT GTGTCTTGCA GAACCACGAC GCCTATGTGG GCCACACCGT
1141 GGGTGCAGCC ACCAGCGCGG TCATGGCCAC CATGATGGGC CTGCGCCTGG CCAAGACCAA

```

```

1201 GAAGGTAGGG GTGGGGAGGA GGGGAGCCCA AGAGTGGTGG GCTGGAGACC AGTAGCGGAG
1261 CTAGGGGGGG CTGCGCAGGC CGGGGGAAGG GAGGGAAATG GCAGTGGGTT TGGGCAGAGG
1321 GAAGGTGTGG AGGGATTAGA GGTAAGTCCA AGCGGCTGTG GTTTGTAGTG GCATGCCTGC
1381 GATGCAGTGT ATGCAGGCGG TGGGTGACAG GCGCTACTAA TCCGTACCAC CACCATTTCGT
1441 TCACGTGCAT GTGTTTCAGGT TATGCCGTCA GGTATCCTAA CGGGCCTGGG CCTGCTGGGG
1501 TTGCTGTACC ACGCCAACAA GGCCCCGCGAG TGGGCCTAGT CACCCGCGCA CCCGTAACAT
1561 ACGGAAAATG TACGAGACCT GTTTGGCTGC TCCC GGCCAA GACGCGGTGT CAGGCGGTGG
1621 CGGCGGAGAA TGCGCCCAA CCATCTTGAT ACCGCGTACG TGTGGGAATG TGAGCGGTTG
1681 CTCGATTTCGT GGCACGCGAA GTTGAGCGCG GTGGGTGGTG GGTGTTTGCT GGGCGACGGT
1741 GTGGTGGGGA CGGACCAAAC GTGTAGCGTT ATTAAGGAGG TGTGCTGGAA ACGGAAAGAG
1801 TTGTGCGCGC GGAGATTACC GTGGGGGCGA GGGCGTTGG GTGCGTCAGA CGGTCAAGGG
1861 CCACCCGAGG GGTAACGTCT CGTTTGCGCG GCGCGTTGCG CGCAGTGGAG TGCTTCGCAA
1921 CCGCGCCAG CTTGCGCTGT TTGAAGTTGA AGGAATTTAT ACTACTGACA ACTCGGTTTT
1981 TCAAGCACGT AATAAGCAAG CCAAGCGTAA TCTGCTTGGG AAAGCGGTTT GTGCGCATC

```

//

```

LOCUS          6      1543 bp      DNA      linear PLN 25-FEB-2004
ACCESSION     6
VERSION       GeneMark.hmm v3.0 self_training
ORGANISM      C.reinhardtii
FEATURES
  CDS          CHR ---
              join(500..546,636..834,978..1043)
              /translation="MINDEGQVVDLYIPRNAWTNKLITAKDHASVQINIGHLDANGV
              YSNQYTTFAIAGNVRAMVSEGRDGRLLRGGDPSSSPQPLGEGDSALDIMWRKKQVEA
              EAH"
ORIGIN

```

```

1  GTAGTGCCTC GGTTTCAAGA AGCACCATGC AGGCGCCTCA CAGCTGAGCA ACTGCTGGCA
61 GATACACCCG GCTGAGCCTC AGTCCAGGTG GCCC GCGCGA TGCCGGCTGG AGGCCATTTT
121 TGCCATTGGT CCGAGCTGCT CGCACTCAGG CGATAGTGTA CTGTGGCAGT TTCGATGTGA
181 GTTTCTTGGA TGCAGACCTG ATAAAGAGGC GGGCAAGTTC AAGCGCCAAC GCCGCCACTT
241 AGTGTGGGCC AGGGGGGCGT GTTGATACGC AACCATAGTA ACGTGAGGCA TTCCTGTAGA
301 GGTGGACGTG TGTATGTGAT GCTTAAAAGG ACGTGTAGCT TGGGACACTT GTGAGCGCGG
361 CGGGCAAAAG TCCTGAGCGG GGGCTGCATG CGAGGCCCAT CGCGACGGGC GTCCAGCCGG
421 GGTCAACTTC GCCTCCATCG CACTCTGGTT CTCTCTCTCC CCGCCGACA CACGAGGTCC
481 ATTTCAAGAC CTTTGAAGA TGATCAACGA CGAGGGCCAG GTCGTCGACC TCTACATCCC
541 GCGCAAGTGG TGGGTCGGCC GGTGACGGCG CTGCGCTTCT CGCTGTGGTA TTTTCTCATG
601 GATAAATCTT ACAAGTCTAT AATTTTGTGC TGCAGCGCGT GGACCAACAA GCTCATCACC
661 GCCAAGGACC ACGCCAGCGT GCAGATTAAC ATCGGCCACC TGGACGCCAA CGGCGTGTAC
721 AGCAACCAGT ACACCACCTT CGCCATTGCC GGCAACGTGC GCGCCATGGT GAGCGAGGGG
781 CGCGATGGCC GGCTTCTCCG CGGCGGCGAC CCCAGCAGCA GCCCCAGCC GCTGGTAGCT
841 GTTTTCCGTT TCCTAAAGAG ATACGTGCGT TTCATTTTGG AGCCGGATGG ACTCGTTAGG
901 GCACCTAGGC GGACCGAGGC GCACATGATG CGATGCCCTG TTCTCCACTG ACGCAAATTG
961 CCCTGGCTGC GCTGCAGGGT GAGGGCGACT CCGCTCTGGA CATCATGTGG CGGAAGAAGC
1021 AGGTGGAGGC TGAGGCCAC TAAGTGCTGA AGCATCCGCA GCGTGTAACC GGTGGTGTGT
1081 GTGGAGCTCG CTTCCCCCTT CTCTTGCC CAGCCAGCAG GGCGCAGCAA AGCATCAGCA
1141 TATACTCCGA AGAATGCTCT GGCAGCATCA GCGCGGAGGG GGAGCGCAGG GTGCAAGGCA
1201 CGGGGGCACG GCAGCCGTAG GGGGCGGGGT GCGTGGCGTG GGGCGGTGGC GAGCCTGCTG
1261 GCCGCGGCGG GCGGAGCAGG CTGCTCTGGC GCTGCGGAGA GGCCGACGGA CGGACTGGTG
1321 GACACACTGG CGTACTGGCG CTTGCAAGCG CTCACACATG GACGAGAGCG GCGGCTTCCG
1381 GTGTCAGCTG CGGCCGAGG GTGCGGGGCT GCGTGGCGG CTGCGAGCCC ACTGCTGCCA
1441 GGCCGAGTTC CCAGCTGCAA TGCACGCAAG CGGGCACAGG CGCTAGCGGG CACAGGCCAT
1501 GCTGCGCTGT GCCCTCTGGC GCACTGACCA GCTGCGCAGC GCA

```

//

```

LOCUS          7      1936 bp      DNA      linear PLN 25-FEB-2004

```



ACCESSION 7  
 VERSION GeneMark.hmm v3.0 self\_training  
 ORGANISM C.reinhardtii  
 FEATURES CHR ---  
 CDS complement(join(500..591,1074..1176,1299..1436))  
 /translation="MYVEDFEAFYEQAVALLYQAKPLETRYTIKFRHSEGKVVVKVTD  
 DRTCLKFKTDQQVDLRKIERITTIFFPLMACGELPAEGQDAAAAQQAPAAAATQSGG  
 AGGKKARRRG"

ORIGIN  
 1 GCACAGGTCA CCCCATGGCT GGGCAATTCC TGACCCGAGT ATCAGCCACG ATACGAGTGC  
 61 ATCCTGGCTG CGACAGGAGC AAGGCCGCCG CGTCGCCATG CAGCGCCAAC CAAGCCGCAC  
 121 CAGCAATCCT GTTCTGTAAG ACCGGGGGCC CGCTCCGCAC CCATGACTCA CATCCTTGTC  
 181 CCACCACTGT CTAACACGGT GGGGTCCAGG TGCGCAGCTC AGGCGCCCCC AAAACCGCAA  
 241 TGCCACTTCT TGCGTGCGTC TGCGGGTGAA CTGCGTTCAT ACATCACTCG CGCATTCAAG  
 301 CCCTGCAGCC ATAGCGCAAC GCAGGCTGCA CATTGCAGCC TGTTACCTCC TTTCCGCATG  
 361 CAATCTCGAG AACCCAAACA CCACCTCGCC GACAACCCCT CACAGCGCCA ACACCTCCCC  
 421 AATTCTCTAA GCAGCAAGCT CTTGCGCCAC CACTACTACT CCGCCAGCCT TCTCGGCCAT  
 481 CTAAAAGAGT CTGTCTGGGT TACCCCGCC GCGCGCCTT CTTCCCGCCG GCTCCTCCTG  
 541 ATTGCGTTGC AGCTGCCGCC GGTGCTTGTT GCGCCGCCG CGCGTCTTGC CCTGTAACCA  
 601 AGTTGACACA GGTGATGTCT CATCATGAGG GGCAGGAGGT AACAGTCGTG GGGTGGGTTG  
 661 TATCAGCAAG ACACCTGCTT GGGAGCTGGC AGCACCATTG AAGTCGTACG GGCTTGGGCG  
 721 AGCAAAGTCT GTGCCCCCGC TAGGTTTCATG GCGTTTGTGC CCCCCTAGG TTCATAGCAT  
 781 AGGGGCCAAG CTGGTGCAGC TGTATGGGTT TTCACCCACG TAAGTCCGTC CAGTAAACAG  
 841 GCACACGCTG TGTTGCCCTT CCCCACGCCA CCGCCCCGCC CCCGAAGCCT GCCACCCGCC  
 901 CCGGCCTTTC ACACGAAACA CCAAGCGCCG GATGCTCCGG ACACCCAGCA TATCCCCTG  
 961 CAGCAGCTAG CGAGTGTGCG CGCCGCCATC GCCTTGCCGG TGCTCAGCAC CACAGCGGAT  
 1021 CGGCCGTGCC TAGGCGACCT TACTGCCCTT GTCCCACTCC GTCCATCCCT CACCCTCCGC  
 1081 AGGCAGTCTT CCGCACGCCA TGAGCGGGAA GAAGATTGTT GTTATCCGCT CAATCTTCT  
 1141 GAGGTCTACC TGTTGGTCCG TCTTGAATTT TAGGCACTGC AGGCGACGCA AACATGGATC  
 1201 GTCAGTGGTC CGCCGCCGGG GAAGCAGCCC ATATTGAGTG CCATCTATAC AGATATACCA  
 1261 CCATTTCTAG TCCAAAAGGC CCAACAGCGC CTGCGCACCG TGCGGTCGTC CGTGACCTTC  
 1321 AGCACTACTT TGCCCTCGCT GTGCCTGAAC TTGATTGTGT AACGAGTTTC TAGGGGCTTT  
 1381 GCCTGATACA ATGCTACTGC TTGCTCATAG AAAGCCTCAA AATCCTCCAC GTACATTTTC  
 1441 GCTCAGCGAC CGCAGCGTGG CTTCTATCAA AGGCAATTGT AAATTAAGT TTGTGTGCCG  
 1501 GGTTTGATAG AAATGTTGAT CGTCGGCGCA GATCAGCAAG TTTGCTTGGG AGCGCTCATT  
 1561 CCGCAGTGTT TACAATGCCC CAAGGCCCAA GCTCTCTAGG CACATTTCTC CCACGTCGCC  
 1621 AACAACTTGT AGAAGATACA CATAAATTAT CAGTGTGTAT ATCCCGAAAC AGCAAGACAT  
 1681 TTAACGAGTT CCAGTCCCGA ACACCCTGTT TTCCTGCGCG TTTTCATTTA AAGATGGCCG  
 1741 ATGTGGCTGC TGAGGCGGTT TCCCTGGAGC TTGAAAGCCC TTCTTCCAGC TCACAGGGTT  
 1801 CGCCGGAGTC CGCAGCAAAT GGCGCAGCTA GGGCCGCTC GCCCCGCGCG CAATCGGATG  
 1861 CCAGTGGAGC TGTTATGAAG AGCAAGAAGG GCAAGGCACA GGTTTGTTC GGGGCAGGGA  
 1921 GTCCTCTCGG CAAACG

//

LOCUS 8 1389 bp DNA linear PLN 25-FEB-2004  
 ACCESSION 8  
 VERSION GeneMark.hmm v3.0 self\_training  
 ORGANISM C.reinhardtii  
 FEATURES CHR ---  
 CDS 500..889  
 /translation="MSSANPRTLGPVIVQLFRDVMKLRERLPPPMRDLGDSYARAE  
 FRSHLRGKTTMEQWKQFVREWQVYLATLRGDEQAAASADANVARVFE LLSDQQRKRM  
 DQLQQLNSRTGGGGGSDGGDAGRPHQ"

ORIGIN  
 1 GTCATACACC TAAACTCTTA CTTTGCGCCA GCAGCCCTGA ATGATGTTTG GCGGTCCTTC  
 61 CAAGCCCAGG CCTCAGGGCC CCCTGACTGC TTCTCTCGCT GCCAAGAAGC TTTTCGTTTC

```

121  GTTTAAGAAG  GCTGCTTGA  TTTCTCGAC  CACTCTGCTC  GTGCTGCTGG  TGCCTCTGAT
181  CATTGAGATG  GATCGCGAGG  CACAGATGGT  AAGCAATCAT  CAGGCCTCGT  AAGGCTCTTG
241  GCGAGGAAAA  CGGGGCGTGA  TGGCCGATGG  ATCGGAACTC  AATACCGTGC  CCGCTGATTG
301  GCTTGCAGAT  TGAGCTTGA  AAGGAGCAGC  TGAGCGTGCT  CACCGGTGGC  CCTGCCGCCG
361  CGAAGGCGTA  ATCAGCTCGA  CGTGAGCATC  TTTGTAICTG  CTCGCTGGTT  TAGGAGCCGG
421  AGCCGCGAGC  CCCCAGTCCG  TCATTAGGAC  TTTCCGACGT  GAAAGCTGGT  CGCTCAGCCA
481  GGATCGGGAG  GCAGGAAGGA  TGTCGTGCGC  AAACCCGCGC  ACGCTTGCCG  GGCCAATCGT
541  GCAGCTCTTC  CGCGACGTTA  TGAAGCTGCA  CCGTGAGCGG  CTGCCCCCGC  CTATGCGGGA
601  CCTGGGGGAT  AGCTACGCTC  GCGCGGAGTT  CCGCAGCCAC  CTGCGCGGCA  AGACGACCAT
661  GGAGCAGTGG  AAGCAGTTTG  TGCGGGAGTG  GCAGGTCTAC  CTCGCCACGC  TGCGTGGCGA
721  TGAGCAGGCG  GCCGCCAGCG  CGGACGCAAA  CGTGGCGCGT  GTGTTTGAGC  TGCTGTCTGA
781  TGACCCAGCG  AAGCGCATGG  ACCAGTGCAC  GCAGGAACTC  AACAGCCGCA  CCGCGCGGAG
841  CGGAGGAGAC  AGCGACGGTG  GCGACGCCGG  GCGCGGCCCT  CACCAGTGAG  GGGCGCGGCG
901  GAGCGGTGGA  GTGCGGGCAG  CGGCTTTGGC  GGGGCAGGAG  GCAACAGTGT  GCTTTGTTGG
961  GCAGGATGGG  ATTTCTGGGG  GCCGAAAGG  GTGAGGCCGC  GGCGCGGCAC  GGGTCTGCGC
1021  CCGTACTGGC  GGGTTGATGC  CGGTGGCAAG  TTCGTGCAGT  GGCGCGGGCG  GCCAGTGCCT
1081  AAGCGGGAGC  TGTGGTCCGT  ACTGGCACCC  TGTAGCAGTG  GTTTCGGGCG  GTTGCCTTGG
1141  TGTAGAAACT  AGCCAGGGCT  TGCCGTGCCA  ATGCGAAAGC  ATGCGGATGC  AGGAGAGGCA
1201  TGCGAGCGGT  GTTGTGCGCT  GCGAAGCTCT  GCTTGCCTGG  GCCTCGGTTG  GACCAGACGA
1261  AGGCATCATG  CAAGAGTTTG  GGTGTTGGT  CTGGTGAATG  ATTACTACTG  GTCTGGTTGC
1321  GGCCATCCAA  GAGGACTGGG  ACGCTGCGGG  TGCACATCAC  AGCTGAGGCT  GGGGTTGCTA
1381  CTGTGTGTT

```

//

```

LOCUS          9      1904 bp      DNA      linear PLN 25-FEB-2004
ACCESSION     9
VERSION       GeneMark.hmm v3.0 self_training
ORGANISM      C.reinhardtii
FEATURES
  CDS          join(500..619,901..1074,1306..1404)
              /translation="MQQVLIRMP TAGGAKASGPLLQQLAKSLETEGAQLASKIKGIV
              VFKIDDAEWSLDLSEGSSGALYEGPPAEGAKPDLTLTTS DATFAQMVMGKVN PQATF
              LTRK LKINGS MGMAMKLAPVLEAAQ PRAKM"

```

```

ORIGIN
  1  GCGCGCGACC  TGGCGTTGGC  CCGGCGGTGG  TCCAGGGGGC  CGTCTCAGGG  CGTGAAGGCC
 61  GGTGGTGGCC  TGCACAGCCG  ACAGACAGGA  CGTGCCATGC  GGGGGAGAGG  TCCTAGCAGG
121  TGAAAGGGCC  TTCCGGTTGT  GCGCGCTTGT  GATAAGCGAA  GAGGTTGTGG  TGCTGGCAAG
181  TGCCTAGCAA  ACCGCTTGCT  ATAATAGTTG  CTCGGGGTGC  GTCGCTCGGA  GCGGAGGTGA
241  TGCTGTCAGG  AGCGGGGGCT  GGCGTGGATC  TGGTGCAGTG  TCGCCGCTGC  ATGGGGGTGC
301  TTGCGCTGAC  GAGGACGGTT  CCTGAGCAGG  AACTGACAGG  AACTGAGCAC  ATATAGCACC
361  ACATCCCTTC  CTTACTTTTG  TTTCAATATT  TACAGCACTT  CCAAACCTGT  TGGCTCTGCT
421  ACGCTCCTTG  ACGCTGCGAC  TTTGCTTCTG  CACAGTCTCT  CCGCCTCGCC  ATCATTTGCC
481  ACATTTTCGT  CACAACACAA  TGCAGCAAGT  ACTGATTCGT  ATGCCTACGG  CGGGAGGCGC
541  AAAGGCGTCG  GGGCCGCTTC  TGCAGCAACT  TGCAAAGTCG  CTGGAGACGG  AGGGCGCGCA
601  GCTGGCCAGC  AAAATAAAGG  TCGGAGCACA  ATGCTGGGGA  GCAAGGGGAG  GTCGGGAAT
661  GAAAAAGCGG  TACCGGGCGT  GCTTTCGGCA  TTTTGGCGGT  TTGCGACGTG  GAGGACGGCA
721  GGCTAGCTCT  GCGTATAGCA  GTTCCCCAAT  TGACCATGCG  TGGAAATTTT  CAATGCTTGC
781  ACTCTGCCCG  CTATCCCATC  GCCCCTGGCC  GGCGGGAGCC  CGAGTGCCGG  CCTCCATCGC
841  TCCGTGGAAC  CGGCTTACAT  GCTTGCCGGT  GCCCCCCACC  CGCATGATGG  CTGCGCCCAG
901  GGCATAGTGG  TGTTCAAGAT  CGACGACGCC  GAGTGGAGCC  TGGACCTGAG  CGAGGGCAGC
961  TCGGGGGCGC  TGTACGAGGG  GCCGCCGGCG  GAGGGCGCCA  AGCCCACCT  CACCCTCACC
1021  ACCAGCGACG  CCACCTTCGC  GCAGATGGTC  ATGGGCAAGG  TCAACCCGCA  GACGGTGCCT
1081  CCGGGCGGGC  GGGCCGGGGG  CGGCTGATGT  GCAGCTTATG  AAGCGGCTGC  ACGTGGGGAA
1141  CGAGGGCAGC  TGGGGAGGGC  GGGCAGGGGC  CGCCGGTGCT  GGCCTGGTGA  GGGCCCTACT
1201  GGTACCGGGC  CGCCGGCCTG  CAACCTACCG  GTACCGGGCA  CCTCGCATCC  GAGTGACTCC
1261  TCCCCTGCCG  CCTTGCCCCC  CCCCCCCCC  ATACACGCAC  GCCAGGCCTT  CCTGACGCGC

```

1321 AAGCTCAAGA TCAACGGCTC CATGGGCATG GCTATGAAGC TGGCGCCCGT GCTGGAGGCG  
1381 GCGCAGCCCA GGGCCAAGAT GTGAGAGGTG GCAGCAGGGT GCAGGGCGCA GGGCACGGGG  
1441 TGGTGTGGCC GCTGACTGGC TGACAGGATG GGGCGGGAGG CGCGGAGGAG TGATGGAGCG  
1501 GCACGAGGAC GGGTGGCGCT GTAGGGGTGT GCGCTGGGAG GAGGGAGGAA GCGCCGGACA  
1561 GGGAGGGAGC GGCAGGTGTT GAGCTGCCGG CCAGGGTGAG GACGAGGGCG GGGTGTGCTG  
1621 ATGTGCTGGT GTGCTGATGT GCTGGTGTGC TGATGTGCGG GACGCGGGGC GCTGGTGGTG  
1681 CGTGAAGCGG AATAGAGAGG ATGGCAACGC GTGGACGTGT GCGGCAGCTG CGAATACGGT  
1741 ACACAATGTT ATGCTGCCCC CCGCGGCGTG TCAGGCGCGG CTGTGTGTTG CACGGCAGTT  
1801 GTGCACTGAC TGCTGACGAG CCGGCCTGCC AGGCGGCCAG CCTGCCACGC GGCCCGGCGC  
1861 TGCGACGGGA GGGCGGGGCT GGAGGGGCGC GGGACTGCGG CGGT

//

LOCUS 10 3780 bp DNA linear PLN 25-FEB-2004

ACCESSION 10

VERSION GeneMark.hmm v3.0 self\_training

ORGANISM C.reinhardtii

FEATURES CHR ---

CDS

complement(join(500..548,984..1128,1970..2110,2972..3029,3269..3280))

/translation="MATQKTAVAVAYCKQGSGLIKLNGQPLELVKPEALRFKVFPEI  
LVIGRAKVKNLDIRLRVKGGGHVSQIYALRQAIKAVVAFYQKYVDEQSKQQIKDAL  
LQFDRTLVADPRRCEPKKFGGRGARARFQKSYR"

ORIGIN

1 CTGAGCGCGG TCGAGGAGAG CTGCTCGAGG CATAGGTCAC TCTGGTGGAC TCGCACCCAC  
61 AAGCTGCAGC GGCACCTGAC GCTATTTTAC CAGTGAGTTA CACCTGGACT AGACGGCGGT  
121 TCGTCCAGAC GCGTTAAACC TCTCCCTCCC CGGCCGGCTC GCCAAGCACA CGCGCCGAGC  
181 CGAGCCGTCG CCCTACGCCG CACTGGCTCA GGCAGCCGCC GCGGCCCCAC GTACCCCGCG  
241 GGCCCGCGCG GCCCGCCCGC CAGCCGCCAG CCGCTGCGAA GCGGGCCAC GACTGCGCCA  
301 CCCCAGCGCG CGCCAGCGAC TAGCCGCCGC CGTCGCCACC GACGCCCGGC GGCCGGCGCG  
361 CCAGCCACGA CAACACCACG ACGACACCTC CGAAAGCGCC CCGGCTGAGG AACCAGCTGG  
421 GGCGAGCCAC GCACCGCTGC GCCGCCCAGA CCCACGCCCC CGACGGCGGC AGTTGCCACG  
481 TGGCATGCGG TCGTACCGCT TAACGGTACG ACTTCTGGAA GCGGGCGCGG GCACCGCGAC  
541 CACCGAACCT GTGGGCGTAA GGAAATACAC GAGGAGAATA GCCGGTCAGC CACGTGGTCA  
601 GGTGTGCGGC GTTGAAAGGA AAGCTTGCGG GACGCCGTGT GCGGGACCCG GGATGCGACC  
661 CGTGTCAAGA GCAATGTCTT TGCTGACCCT AAAGAACTCC CTGGGCTTGT GTTTTAGCAA  
721 GAAGCTCGTT GCGTCATTGC ATCCCCCACC ATTTACCACG CATCCCTCCC GCCATTCAAT  
781 GCTTTGGGCG TCACTCATCG CTCGTTCTTT GCAAAAGCTT TCCCAAACCC GCCTCCCCAG  
841 CATTGCGGGC GTCCCGGCAC AAAGCTCCAG CGCAACCACT TGGAGCCCGA CCCATCGGCA  
901 CATTGTTTTT CGCCCGACCT CCAACCCCCC AGCAGCCCCT CCCTAGCGCC CCAAGCCCCC  
961 CCACGTCGTC CCAGAGCACC CACTTCTTGG GCTCGCAGCG GCGGGGGTCA GCCACCAGCA  
1021 GCGTCCTGTC GAACTGCAGG AGCGCGTCTT TGATCTGCTG CTTGCTCTGC TCGTCCACGT  
1081 ACTTCTGGTA GAAGGCAACC ACGGCCTTGG CGATGGCCTG GCGCAGAGCT GTGGGGTTAA  
1141 AAAGCAGGAA GGCATATGAA AGAGAGGTTT AGAATGCGGA TGAGATGCGA GGGATGTGTT  
1201 TCCGCGTGCT ATGGGTTAGG GTCCGGTGGC CAGGAGCCAG GCCGCCGCGG CTCCTCCAAC  
1261 GCAAGCTCCC ATGCTGCTCT GAGCTGCAGT CATTGCGTG ACTGGGTGCC ACAAATGCTT  
1321 GCGTTCCGGG CGAGCTGCTG CAGAGCTGCT CCCGGCGCCC ACGCCCCGCA GCGCCCCGCG  
1381 CACTCGAATC GTTGCGGCAC ATCCCGATGA TATGCCGCCC TCTGCTGCAA TGATCCCTGG  
1441 TACTCGCCGC CGCCGCCCCC CCGTGGCGTC GACACGTTGC GCCACGCGGT TCCCGGTAAC  
1501 CAACGGCGGC GGCAACATGC GGCCCCGCGG CCACGTTTGC GGCTTGCCAT AATATGCTCA  
1561 CAATCCTTCG CCCGCAGAGC CTCTGTAGCT GCTGCTAGCT ACGGTAAGTC GCCATGACGC  
1621 GCCATTTGCA TGGGCTAAGC TGCTGCGCAT ACGTCCGCTC CCCCAGCCCA AGCCTGCTAC  
1681 TCCCGCAGTC ACCGCGCTGC TCACTGCACT TTTCTCCAGC TCCAGCTGCT GCTCCACCGG  
1741 CCGCCAAGCC GCGCCGCTC GCCGCTCTGA CCTCGTCGCT GCTCAGGCC ACGCTTCGCC  
1801 AGTTTGGTGC TCAGCAGCGC TCGCACGAGG TTGCCGCGG CGGGCGGGGG GCATCGTAAT  
1861 CGATACCCGT AGCCATGCAA TTCCCCCATA GCCATTCCGC CCGGCATGTC CCACGTCACA  
1921 CCCCCAACCC CTCCTCCCA CTTCTTTCAC ATGTCGAACT TCCACGCACC GTAGATCTGC

1981 GACACGTGGC CGCCGCCCTT GACGCGCAGG CGGATGTCCA GGTTCTTCAC CTTGGCGCGG  
2041 CCAATCACCA GGATGGGCTC AAACACCTTG AAGCGCAGAG CCTCGGGCTT CACCAGCTCC  
2101 AGGGGCTGGC CTGTGGTTGG AGATGCGTAA TATTGGGACG TCAAAGGCAG GTGCGCGGGC  
2161 GTCAGAGGAA GGGAGAAAGC TGGATACGGA GTGGTAAGGG CTTTGGTATG CCGCGTACAG  
2221 GCTGTGCAAC GCGCTGGGGC GCTGTGAGCC GTTGAGCCAC CAGGCTGGGC AGAGCTGGGC  
2281 TGGACTGGGA GGAGGACAAC CGTCCTGTGG GCTGAACTGT TTGGCGCTGC TGCCACCAGG  
2341 CTCGCTGCTG CGGGGCCGGG CGTCTGTGCT GACGGCCTGT AAGCGCCGCT GCACCCCGTG  
2401 CAGCGAGGGC GCAACCCCGC CCCC GCCCAG CAGTCTCCTG CGCACTGCGC GCCTCCAGCC  
2461 TCCTGCCCCC ACTCTGACGC ATGCTGCGTC CCTCCAGCAA CTCCACATAT GGCCTGCTG  
2521 CCCGCGCGCC AGAGCATTCC CTGTGGTACA GCTCCGGAGG CTGTGTCCGC CAGTGC GGCA  
2581 CAGTGTCTCC CCGTGTCTG CGCCATGAGC CGACGGCTGC CGCCAGGAG CCATAACTGT  
2641 TTCGGCTTGT AACACGCCAG CAGCATGCCG GATCAGTTAT TCGGCTCGCA GCTCGCAGGA  
2701 CGCGAAGGCT CTGTGCGAGC CGATGGCCGG CCCAGCGCTC CCGAGCCAGC ACATTTGATT  
2761 CCACCCCGCT TCCTGTTTGT GTAAAGACTC CTTCAGGCCG CTCCATATAC GTCTGACTGC  
2821 TGCGCCGCGC CATCCGCCGC CCAGCCTCGC CCGCCGCCCT GGTAGAGCCC GCGCTGCTAC  
2881 TGTGATGTAC CCTGGGCTCT TGCTAGAGCC TTTGTCCTTC GGCTGCGCCA GTCCTGGCCA  
2941 TTGTTGAGCG ATCCACCGGC TTTGCACTCA CCATTAGCT TAATGAGGCC GCTGCCCTGC  
3001 TTGCAGTAGG CCACCGCGAC GGCGGTCTTC TGCAATGGCA TAAACCAGCA CAAGGCGAGC  
3061 GTTCAGCGCT GTTCCCCGTG ACATTATGCC CGGCCGCCGC AAGGAGCCAT CGCAACCCAA  
3121 GGCCCGCCTC ACCTTGCGGC CGAAAGTCTG CACCGACTGT TGCATCCATG CCAGAGCAGC  
3181 GTAGGCACGG GGTATGGGCA GAAGGGCACA AGCCGTCAGC ATGTGTTTTG GCGGCACTGC  
3241 CCCGCCCGTC GCTGCTCCTT ATGCCTACCT GGGTCGCCAT TTTGGCAGCC TTTCTTTTCG  
3301 CAATGCGGAA GAGGAATTTT CCTGGTGCCT AGCGCGAGGT GTAGCCCCC GCTCGCTACC  
3361 CGAGTGGAAT GGGGCCCCAT GGCTTTTCTT GCCGAGCCCT CTTTCCCGAA GGACTGATAA  
3421 TGCAAGCTAT TATATGTGCA GCTGCCTATC TATGACAAGC TTAGCCGTTT TGAAGGGTCC  
3481 CTTGCGTCCA TAGCCTCCGA GAATTGCAA CTTTGCCCGC TGCGCAGACG CGCCGGGGTT  
3541 ACGCGTGC GG ACCAGTTCCT CCTGAAGAGT GATGTAAACT ACATGGCGTT TGCATTTCTA  
3601 GAACGGA ACT GGGCGGCGGC CCCGACCCCG GCCTCTCGGC TGCCAGTGGC TTGCTCGGTC  
3661 GCGCGCGGCA CCGCGGCGGG GACTCCTGCC TCGGATGCAC CAGAGCACCT GCGACAGTTC  
3721 AGCATAACCG TGCAGAAATCC TCAGAGACGA CGTCTCTCAT CCGCGGTGGC TGCAAGCGTG  
3781

//

LOCUS 11 2227 bp DNA linear PLN 25-FEB-2004  
ACCESSION 11  
VERSION GeneMark.hmm v3.0 self\_training  
ORGANISM C.reinhardtii  
FEATURES  
CHR ---  
CDS join(500..530,649..803,993..1070,1365..1458,1672..1727)  
/translacion="MPLGGKLVKGGTTLKELDGGVEKKKSKPKKLKEGGEGAEGG  
EGAVATADGAPADPTKPKPAVPTAINVMSGKNYEQEFDIEMKRVQEGKSKSTPWGCG  
YRAPPAILHGYTSKVTGKTAERLDLRSAAKSDKFCK"

ORIGIN  
1 TTCCCACCAG CGAAATGGCT ATCGTGAGCG GTTATGACGT GAACCTTAAA CATGACGAAC  
61 CGCGCTGGGG ACAGTGGAGC CATGGCCGGG TGAGGGCGTG CCCACGCTAG TTCAGCCTAT  
121 TCGCTCAGGG CTTGCACACA AGGTGACATG AAGACATTCA CATGGCAGCT GCTTTTGATG  
181 AGTGTA AATT ACAGTATACT GCCGAAATGG AAGATGAGAC GACCTGCATC GCAAACCTTTG  
241 CCTGTTTCAA GGCCCTAATT GATTCTTCTT TATGCTCCGC TGACTTGACC ACGTAACACT  
301 TGTAATACTT TTAGAAGCTT GCCCGTTCAG CGAGTTGGTT ACCTGAATAA CGTCACTGCT  
361 CCTCGTTTTG CATCTAGAAT ACACATAACC TACTGCTTGC ACAGACAAAG TGTAAGAAGCG  
421 ACGGGCCTGC TGCTGTAATA GACGTGCTGC TGGAAGGGAG CATTCTTTGC GTGCCTGGTC  
481 TGTACAGTGC ATCGCAGCTA TGCCACTAGG TGGCAAGCTG GTGCTGAAAG GTGTGTGTCC  
541 CGTTGGATGA GCGTGGGACA GCTCAGGTAC TTGGTCTGCTG GTCCTTTCAG CGCCTTGCGG  
601 TGCCGTGTCG CGTGCACCCC CACCAGCTTC CGGGCTCATG CTGCGCAGGC GGGACGACGC  
661 TCAAGGAGCT GGATGGCGGC GTGGAGAAGA AGAAGAGCAA GAAGCCCAAG AAGCTGAAGG  
721 AGGGAGGCGA GGGTGC GGAGGCGAGG GCGCTGTGCG CACGGCGGAC GGCGCACCTG

781 CCGACCCAC GAAACCCAAG CCGGTGCGTG GCTTGCGGGG CAGCAACGCG GGAGCTCCCT  
841 AGCCCCGCC CGCCAGTCA GCTGGCACTT GTCCGCTGCA CCGGCGCCCC GCTGCCATGC  
901 CACGCCCTTG GATTTCTGGA TATGGTTCGC GAGCCGTGAA CCGACTGTC CGGCTGACAA  
961 GTGTGCCCGC GCCATCGTGC TGGTGTGCGC AGGCGGTGCC CACGGCCATC AACGTCATGA  
1021 GCGGCAAGAA CTACGAGCAG GAGTTCGACA TCGAGATGAA GCGGGTGCAG GTGCGGGCGC  
1081 AGCCGCGCGG TGTGGGGGCC GGGCCGCGAG GCCAGGAGCC GGGGGCTCAC GCGGCCGCGC  
1141 TGCGAGCAGG GCCAGCTGGG GCGACCCGCG CCACGCTGCC CGGTTGCTGC AAGGCCGCAA  
1201 TGGGTGTTGG GTTGTGGAGG GGGTTGCGGC ACGACATATC GCCTCAGAGC CTGCTTACAT  
1261 CTCCTTTGCG GCGCGAGCGC ACAAGGCGGC ACGGGCGGGC CAGGCCTCCT CAACTTCCTA  
1321 CTGAGGCCAC GCCCCAATA CGGTGCTTGC CGGTACACGC GCAGGAGGGC AAGTCCAAGA  
1381 GCACCCCGTG GGGCTGCGGC TACCGCGCGC CGCTGCCAT CCTCCACGGC TACACAAGCA  
1441 AGGTCACTGG CAAGACAGGT GAGAGAGCTA CTAGAGCTAC TGAGCTACTG AGTGCCAAAG  
1501 CCTACACCAC CTACACACAC CCGCAACGCT TGCACTACTG CTTTGGCACT GCGTCCGGAC  
1561 CGCCTGCAGC ATTTCTAGC TGTGCCGTGC CGTGCCCGCC GCGCCGCTTG CGAGGGTCAC  
1621 AAACCTTTCTT GCCTGCCTGC TGCTGTATGC CCCTTTTCCG CCCACATTCA GCCGAAGAGC  
1681 GGCTAGACCT CAGGTCCGCT GCCAAGAGCG ACAAGTTCTG CAAGTAAAGG CCGGCGGGAC  
1741 GCGGAAAACA CGCGGCGACA CGTGACACACC GGCCGGTGCT GCTGTAGTCC TATTAATTCA  
1801 CACGCCGGCA CAATAAAGCG ATCAGCAGCT GTGCGTGGCG GCTCAGTCTG GCCTTCTATT  
1861 TGGCGGCGGG CGGCAGCAGG ATGTCCCGAA TGGCTTCGCG GAAGGCCGCG GGCTTGAAGC  
1921 CCAGGTCGGA CTGGAGGCGG GAGATGTCCA TGGAGATATC GGGGGGGCTC ACCACGCCCC  
1981 TGCGGCACCG GGGTGTGCGG CAGTGGGGTT ACATTAACGA TGAGTTAATG AATGGGTAGA  
2041 CGGTGGACAG TCGTGGGGAA CAACAATCGT TAACGGGTGG GGGCTGTGCG CGGAAGAGAT  
2101 GCGTGGCGGT GTAAGGGCTC GGTGGGTACA GGTATTAGAA AGGCGGCATG GTTACGGGAG  
2161 GAGCTGGCTG GCTGTCTGGC AAGTGGAGTT GTGACCAACA GCTTTGCTAC AGCGGCTGCG  
2221 GCATGTT

//

LOCUS 12 1852 bp DNA linear PLN 25-FEB-2004  
ACCESSION 12  
VERSION GeneMark.hmm v3.0 self\_training  
ORGANISM C.reinhardtii  
FEATURES  
CHR ---  
CDS join(500..569,691..980,1224..1352)  
/translacion="MLDDLKDLPSKGPLRELAaipANSTHDTAPPKdQVIHTDNSTA  
ALIRIVRKGASKPQTGKKGQAAGVEAAPTTGKRtheASAADGDERPTKKAAGAGTSG  
AAAVAKLLLP IATFTAEQLKAKTIPQLKELLKARGLAVSGAKDELIRRIVDHQRANK  
YAPAK"

ORIGIN

1 GTAAATGCTA GGGAGGCCTC ACAGGGATGC TGCGATGCGC CTAGAGGTAT CACCTGTGCA  
61 GCATAAGGGG GCTGCACCCC TGGCCGCACC TGCTTGCAAT CATGGTACTG CAAGAAGAAC  
121 TCCACTGTCT GAGAGCGCCA GCGCGGGGGC CCCGCTGGCA TCTGCACTGC CTGAGCATT  
181 GGCACCTGAC CTGTCAACTG GGGCATTAC TTGAAGGAGC GCGGCAGGGG AGGCGGATAG  
241 CGGGGAGCAT TTAGGACGCG AGACCTGCGA GACCAACGTC GGGTGACCAG GGGCACCCAT  
301 GAGACCCACG CGTGCTCCGA TGGATCCACC GGCAGCAGCT GTCTGCTTTT GTCATGCATT  
361 GTAGCAACTG TTATATTCGT TACTCCGAAA TAATAACGTT AATCCGCACT CGAGTCCGCT  
421 GCACCTGTTA TATGCAAGGT GCTCCTCGGC ACCGTTGACA AGGGCTGGC ATGCACCTAG  
481 AGTTACTCAA GTATAAAAA TGCTGGATGA CTTAAAAGAC CTGCCTTCCA AGGGCCCCCT  
541 GCGCGAATTG GCAGCCATCC CGGCCAACTG TGCGCACACA TACATAGGTA AGTGGTCTGC  
601 AAAACGCGCA CTAGCGACGT GACATGATTA GCAGCAATTG ATGTGCGGTG TCCTGACATG  
661 AACTGCAATG CGGTTCCCGC CCGTTTGCAG CGACACACGA CACGGCCCCG CCGAAGGACC  
721 AAGTCATTCA CACAGACAAC AGCACCAGCAG CGCTGATCCG CATAGTAAGG AAGGGCGCAT  
781 CAAAGCCACA GACAGGGAAA GGGAAACAGG CAGCCGGGGT GGAGGCGGCT CCCACCACCG  
841 GCAAGCGGAC ACACGAGGCT AGCGCTGCAG ATGGCGACGA GCGGCCTACG AAGAAGGCCG  
901 CGGGCGCGGG TACGTCGGGG GCAGCAGCCG TGGCAAAGCT GCTACTGCCG ATTGCTACCT  
961 TCACGGCCGA ACAGCTGAAG GTGGGTAGCG TGGTGCATC TCCGTGTTTC GCACGTGTAT  
1021 GGTACCGTGT GTGGGTGCGG ATCCAGTGAG GACGGTTCTG CAAAAGCCA CAGGGCCATA

```

1081 CGCCCATACA TCTTCCCGAA TGCCTGGGCT GACGGCCCCG GAAATGATGC GAAGCGTATT
1141 GCATTCGGTG CCCCTCTGGC ACGTTCCTCT CTCCACGCCA TCTCGTCTTT ACTCCGCTCA
1201 CTCCACCTCC ACGACACAAA CAGGCCAAGA CCATTCTCTA GCTCAAGGAG CTATTGAAGG
1261 CGCGCGGCCCT GGCGGTGAGC GGCGCCAAGG ACGAACTCAT CCGACGGATA GTGGACCACC
1321 AGCGTGCAAA CAAGTACGCA CCAGCCAAGT AGCGAGCCCT TAGCAGCCAT GTAAGAAGGA
1381 CCATACTGCT ACCGTGCCGC GTACAGCGCC GTGCAGCCCG CCGCCCTTCA CGTACACGAA
1441 ACAGCGGCGC ACCAAGTGGC ATACACCAGC ATTGCAGCTG TCCGAGTGCT GAGATCCAAA
1501 GCTCTTGCCG CTCCGCGTTA GTTAGAGCAT GTTGCCACTC TGGCGGCTGA GCAGAGCCTC
1561 GAACATCACT GTGGGCAGGG CAGGCAAAAAG GAGCAGTGCT TATAATCGTG TCAGTCCGGT
1621 AGCTGGGTAC TACCAACGAA TGTTTCATGC ATAGGTAATC TGGATGCATT TTCTGGATTT
1681 GGGGTATAGA AAGACGAGCT CGAAGCCAAA GGAGCATGCG ACTCACTGTA CATTTCAGGT
1741 CCAGCCCCGT GCATGCCGAA GATGTCCTTC GCCCGCCGGA GCGTTTCCTC GCGCGTTTGC
1801 CGCCCAGCAT TGAGCTCCTT GATTTGGTGG AGGAACTGGC GGCACGTGCG TG

```

//

```

LOCUS      13      2827 bp      DNA      linear PLN 25-FEB-2004
ACCESSION  13
VERSION    GeneMark.hmm v3.0 self_training
ORGANISM   C.reinhardtii
FEATURES   CHR ---
CDS        join(500..721,1146..1326,1784..1845,2082..2327)
           /translation="MSKITGGKKASGVDNTARRTWDREEYRAIAEEKEKEKKEAAKA
           RGAKDGDHHEETAADIRRRKRQERDPLHHGLIVERSLLKQRDYAIDLTSRLGKTQ
           VVGFNTPLNQQAGWFCNVCNVLRDSQSYLDHINGKWHNRALGMNMKVEKSTLEQVK
           NKFEELKSRKSPPPDEYVPDGFDAASAEAKEREKREKKRRKAAEAAAAGGGGGAA
           GGEMDPEMMQMMGFGGFGSTKR"

```

```

ORIGIN
1  TCCAAACGTT GCACCACAGG CGCATACTGT AGAATACAGA AATACTGTAG AATACAGAAA
61 TCACTGTGCC AAGAATCGGG CCAACTCCTG ACCAAGCTTC TGCGTTACTG CTTGACTTTA
121 GCCCATCGTA ACATATTGAT GACAAGCGTC AGAATTCTTT CCCAGAGTTG AAGCTTAGCG
181 AGGAGGGCCC GGAGTCTTCT GCGCTGCTTT TGTCAGTCTG TGGGCTCGAT TCTTGAGAAG
241 AGGTGAGCTC AGCAACACTT GCGACATGTC ATCTCCATGG CGCCTCACGA GGCGGAGCCT
301 TCAGATGGCA GCGACCTTGC TCGCAGCTCC ATTTGCGTGC GCTGTTCCAT TCTTTACAAT
361 CCCTTTGACA GAGCGCCAAC TCTAGCTGCG GAGCGAGGCG GGTGCAGTAG CTGCGACCTA
421 GTCACCCACG ACTGGCGTGT GAACCCGCTT AGCGGCTCCC GTGCCACCGT TGCCACCGTT
481 GCCACCAGCC GTCGGCGCCA TGAGCAAGAT AACGGGGGGC AAGAAGGCGT CGGGCGTGGA
541 TAACACGGCC CGTCGCACGT GGGACCGTGA GGAGTACCGG GCGATAGCGG AGGAGAAGGA
601 GAAGGAGAAG AAGGAAGCGG CCAAGGCCCG GGGGGCCAAG GACGGTGACG ATGACGACCA
661 CGAGGAGACG GCGGCGGATA TCCGCCGCCG CAAGCGCCAG GAGCGCGACC CCCTGCATCA
721 TGTGGGGGGC GTGGCGCATG GGGCGTGACG TGAGGGGCCT GGCGTAGGGG CATGGTTTCA
781 CGCCAGGGTG CAGGGAGTGG GCAGGGCAGG CGGGAGGGCA GGTGAGGCGT GCGGGCTGCA
841 GCGGCGTGTG GGGGCGGGTG GGCCGGGCTG CTGGAGCAGT CAGCCGCGGC AGCGGGTGAA
901 GCGGCCACC GGGACATCCA GCACGTGGAG ACTGGTTTAC GGGCGCGGCT GCAATCCCTC
961 TACGCATGTG GCACCTGTGC CCACCTCACC ACATGCGCCC CACCTCCTGC GGGCCCCAAC
1021 CACCTCGAGC GTCCCCACCG CATGCGGCCC CCACCAACCA CCTCCTGCAA CCCCCTTCCC
1081 CAAATTGGTT CACAGTTAAC CCTCCCCAA ATTGGTTCAA AGTTAACCTT CCCCCAACC
1141 TACAGGGCCT GATCGTGGAG CGCTCGCTGC TCAAGCAGCG CGACTATGCC ATCGACCTCA
1201 CCTCGCGACT TGGCAAGACG CAGGTGGTGG GATTCAACAC GCCGCTCAAC CAGCAGGCGG
1261 GCTGGTTCTG CAACGTGTGC AACTGCGTGC TGCGCGACTC GCAGAGCTAC CTCGACCACA
1321 TCAACGGTGA GGGCGTGCGG GGGCGGTGTG TAGGGAGATA AGAAGGAAGA AAAGGGGATG
1381 GAGGGAGGGG AATGGAGACT GTGCAGCAGG AGCAGGGTTG CGGGAGGGTG GCTGTGGGGT
1441 GCGTTTGTAG CGCCGCCATG AGGTGAGCAC TGTGAGTCTT ATGGCACCAA GCTGCAGGGA
1501 GGAGGCTAAG AACGCATCAC GGGGGCGTTT GCTAGCACGT GGGTGACATT GGAATGGCGG
1561 AGTTGCAATG CGGGCAGCAT GGTGTTACAA CCGCGTGGCT GGGAGGGCAC CATCCGGCAT
1621 GGCTCGGCTC TGGAAATGGT GGGTGGCCCG CGAGGTCACT CGTGCAAAGC CACGTGCGTT
1681 GTGCTCATGC AGTCCTCTGC CTTCTCACCC ACCCCACCC ACCCACCCA CCCACCCTTA

```

```

1741 TCATGAATGT GACCCCTTTC CTTACCATT C CAACCCACG CAGGCAAGTG GCACAACCGC
1801 GCTCTGGGCA TGAACATGAA AGTGGAGAAG TCCACACTGG AGCAGGTGCG TGCGGCAATG
1861 TGATGGAGCG CGCGTGGCCT TGTGAGGTGG TGCTGTATGG AAACGTTCCA GGCTTCTGGC
1921 AGGAGTAGCC TTTGTGCGGT GTTGTAGTGA GCAGCGCGTT ACGGCACTAG GCCACGCAAG
1981 GCTTGACGAT TGGCATGATG TTGGCGGCAG CGCGGTATGC CTGACATGCG GGCCGAAGTA
2041 GACTGTTCCA ATGTCCGTAC GCATCGCTTT TCTTCCTGCA GGTGAAGAAC AAGTTCGAGG
2101 AGCTCAAATC CCGCAAGAGC CCGCCGCCGG ACGAGTACGT GCCTGACGGC TTTGACGGCG
2161 CGGCGTCCGG GGAGGCCAAG GAGCGGGAGG AGAAGCGCGA GAAGAAGCGG CGGAAGGCGG
2221 CGGAGGCGGC GGCAGCGGGC GGCGGTGGCG GGGCGGCAGG CGGTGAGATG GATCCCAGAG
2281 TGATGCAGAT GATGGGTTTT GGCGGATTCC GGTCAACCAA GAGGTAGACG ACGGGCCAGA
2341 AAGCGGGATT ATGGATAAGA ATGTCGGTGG CTATGCGACG GGAGGAGGTA GCCTTTGGAG
2401 TGGGAAAGGT GCGCGCAAGC TATCGGATGC CTGCCAGGG CCCGCATGCA CTGTTGACAC
2461 GAGCATGAGG TGTGGTGTCT TTTTGGGGTA ATGGATTGGG AAGTAGACTG CCGAGGCATC
2521 GGATGTGGCA TCGACAGCAG CAGAAAGGAG CAGGCGGCGC TTTCAAAGTC GCAAGCTGAT
2581 CTGGGCTTGC GCATGTCACG TCTAATGAGC ATGGGTGCGG GCAGGTAGAA AGGCCGCCGT
2641 GATGATGGTC GGGGCTTTCA AACGGTCTAA TCTGTACGCT GTGCAGCTGT GTGTAATGCA
2701 CACCGCACAC GGTCTTGAGT CCTGACAGGG CGGCAGCCGA CAGCTGTGAC ACTGTGACGT
2761 GTCGGGTGGG GGA CTGGATG GGCCTCTCT GGGCGCCGGC ACGCCGCATG CGTGCACCCG
2821 GCGCGCT

```

//

```

LOCUS          1          1279 bp      DNA      linear PLN 25-FEB-2004
ACCESSION      1
VERSION        GeneMark.hmm v3.0 self_training
ORGANISM       D.melanogaster
FEATURES
  CDS           complement(join(500..686,745..779))
                /translation="MVNVMKGVLECDPAMKQFLLHLDEKLALGRKFIIQDLDENHL
                FISTDIVEVLQARVDDLMDRISFPLHDKDA"

```

```

ORIGIN
1  ACTTGAGGCA GCGCGTGTCC TGGTGC GTTT GCAGGCATCT AACGCAACAG TATCGCGTTC
61 CGCAGGCGGT GCACGAGTAC AACGAGAAGT TGCCGCAAAC GGCGCAGAAA TGCCGCAGTG
121 GCTTTTGTGG AGCCGGCGCT GCGGCGCTCT CGTAGTTGGG CTGCTTGTCC TTGTCTCCT
181 CGAGCAGTTG CTGGAAGTTC TTGCGATACT TGACGAGAAA GTATTCGGCG CCCTTGCGCT
241 TGCCTTTCTT CTCCTTGCCG GTCTTCAGGC TGTCTGGAA TTTGGGCAAC TTCTTGACA
301 TGACAAGGTC GCGTGTGGG TCATCGTGGT AGTTGTCCTG CTCCAGAGCC TCCAAGGCTT
361 TGCGGGCACG CCGCTGGCGG GCTGTGGAGT CCAGGACACG CTTCTTTTCA GCGTCCTTGA
421 TGCGGTTGGA TTCGCGACCC GTCATGGTTG TTTTLAGGTT TTTACTTTTG GCTATTGGAT
481 TTTATGGGTT GTGTAGGTTT TAAGCGTCTT TGTCGTGCAG CGGAAAGCTT ATCCGATCCA
541 TCAAGTCGTC CACTCGCGCC TGCAAAACTT CCACAATGTC CGTGGAGATA AACAAATGGT
601 TCTCGTCCAG ATCCTGGATA ATGAATTTGC GTCCAGAGC CAGTTTTTTCG TCCAAGTGCA
661 GCAGGAATTG TTTCATAGCA GGATCACTGC GGGGATTGGG TTGAATATAG CGAAACCAAC
721 GCATACCAAA CGTATAACCAC TTACCACTCC ACCAGCACTC CTTTCATAAC ATTTACCATG
781 TTGCCAGCAT TTGTTTGCCG AAATTAATAA ACAATCTCAC CAATTCTCAG AGCTGAATGA
841 CATATTCACA GTGAAACGTA GGCTAGAGGT GGCAGTCTTT ACTATCGATA TTTTTTTGAC
901 TTTACTTGAT AATTTAATCA ATAATTTTCCAG CATGGCAATA TAATATTTAC AATCAACGAA
961 ATATAACACA TTGCTTTAAA CCAGCACCCG ATATTAACTA TATTATGTTA GTTTCACCGT
1021 CGGAAGTTTC GTACTTTAAG AAATATAGCT ATTTTGCCAG CCCTATCAGT GCTACTCACT
1081 ACGAAAAGTA GACAGAAGTA GCGGGGTATT TGCCAGTCAC ACGGACAAAC ACCAAGGCAA
1141 AAGTGTGAGG AAATATTGAA TTCCAAATTA AATTCCTAAT TAAATCAGAC CATAAGCACG
1201 CAATGGAAAG GCTGACCGGA AGGAATGTGG CACTACTGGT GCTGTGCCTG TGCGCCGGAT
1261 ACGCCCTGGT GTTCGCCGA

```

//

```

LOCUS          2          1352 bp      DNA      linear PLN 25-FEB-2004

```

ACCESSION 2  
 VERSION GeneMark.hmm v3.0 self\_training  
 ORGANISM D.melanogaster  
 FEATURES CHR ---  
 CDS complement(join(500..634,703..852))  
 /translation="MTNLQRWLFYASLFAIPYLSVVLGTVQTPLTTKYFLHIQLLPL  
 LLLVIFGIYSVWTVLYRSLTFNDCPEAAKELQDEIQEARKDLIAKGRFRD"

ORIGIN  
 1 TTTTGCAGAA GAGAAAATTA AAGTTTTGAA ACAGTATATT TTTTCTCTT TCGCATTGTA  
 61 ATTAAGAGAA TTTTAAAAA ATTGATTTAT TGGAAATAGA TAGCCAAAGC ATGGATTTGC  
 121 AATATATGGT TCGCACTTAC GAGTTTTCCA TATACCATGT TCATTAAGTA AAAATATGTT  
 181 TTCCGTAAAG AATATTATTA ATCTCTTTAA ACGTATTTTA CCTCATATAC TTTTTTAGTT  
 241 TTCTTATATT TTTTATTTTG AGTAATTCAC AGGGGAGCTA AGCCAATTAA ACATAAACAT  
 301 ATTCCATACT TTTTCAAGCA TATCCTTTCA AAACCTCAAC ATAATTTGGC CACCAAACCT  
 361 CCGACACCTG GGGAAATCAG CCCCCAACAA CGCGTCCGCC CACACAAAAT GCGGTCTAGA  
 421 GTAAATTTGC GTAATTTTTG TTTTATAAAA TAATGGAATT ACAGATTAAC ATGCACAAGT  
 481 CCTACGAGCT GGAAGTCTCC TAATCTCGAA ACCGAAATCC CTTGGCTATC AAATCCTTGC  
 541 GAGCCTCCTG AATTTTCATCC TGCAGCTCCT TGGCGGCCTC GGGACAATCG TTAAGAGTCA  
 601 GAGTTCTATA TAGAACAGTC CAAACGGAAT ATATCTGTGG GTAATATATA GTAGTAGTCA  
 661 ATAAGAGGTG TTATCTGCAT TGATTCATAT CCAAAAACCTC ACTCCAAAAA TCACGAGGAG  
 721 CAAAAGTGGT AAAAGCTGAA TGTGCAGGAA ATACTTGGTA GTTAGTGGCG TTTGCACTGT  
 781 TCCCAAAACA ACGGAGAGAT AGGGAATCGC AAAGAGCGAT GCGTAAAATA GCCAGCGTTG  
 841 TAGATTTGTC ATAGCTAACG AAATTTATTG GTAAACAAAA CTAAACCGAA AATAAAGTTC  
 901 TACACGTAAA CATAGAGCTG GAACTTAAGC CGATGGTCAC CCGGTAATTC GATATCGATA  
 961 TTTACCGGCT ACTATCGATA GGAGGTTTAC CTATTCAAAT CTAGTTAGAG GTTTTCTTAT  
 1021 TCATGTCTAG TTGGAGATTT TCTAATTAGT AATTCGTAGC CTGACGGCTT CCAGTTAGAC  
 1081 ATTGTTTACT TTTCTAATTG GCTAACTTAA GTGTGACCAA GCCCTAAGCA CGTGCCATAG  
 1141 CACAAAGCTA TCCACAGTCA GCAAATCAAA TGCCATACTA CTCAGCTAAA CACAGTCAGC  
 1201 AATTTATCGA TAGATCAAAG TTGCGCCATA ACAGCCAGCC TTCTACAGCC AGCAATTTAA  
 1261 ATCAGAGTAA TCGATTGACG CAGTTTCAAA CTTGTTAAAA CTAAGTTTTA ATTAACGTT  
 1321 GGTGGGCGTG GTTCTGCGG CGCCACTGT AC

//

LOCUS 3 1305 bp DNA linear PLN 25-FEB-2004  
 ACCESSION 3  
 VERSION GeneMark.hmm v3.0 self\_training  
 ORGANISM D.melanogaster  
 FEATURES CHR ---  
 CDS complement(500..805)  
 /translation="MAGTKVLRSLHLELRQASPNGCIKDSLAAARYILAQYKKFATTE  
 QQFCKARNEATFLGQTYLTYLASQRRYLELYKEYHGRGERSVRDADLVGFKLPSDP  
 K"

ORIGIN  
 1 ACCTTGAGG GCTTACCTA TGTGATCTT ATCGGGACTT CTGTGATGCA GGTCTACCTG  
 61 GTGTGCTATT ACGGTCAGCA AGTTCTCGAC TTGGTGGGTA ATGGCTGAGA TCCTTGGTAT  
 121 GCCCACTAAC TGAGGTTCTT CGCAGAGCGG CGAGGTGGCC CACGCCGTGT ACAATCATGA  
 181 TTTTACGAT GCTTCTATAG CGTACAAGAG GTACCTGCTC ATAATCATT TACAGGGCGCA  
 241 GCAGCCCGTG GAACTTAATG CCATGGGCTA CCTGTCCATT TCGCTGGACA CCTTTAAACA  
 301 GGTAATATGC AAACACCACG TATACTTTAT ATGACATTAT GTGAATTTTCG CTTTCAACTG  
 361 CAGCTGATGA GCGTCTCCTA CCGGGTTATA ACCATGCTCA TGCAGATGAT TCAGTAGACA  
 421 GCAAACACAA GCACGGAGTT TGCAAAATCG GGACGCTTTA ATCGCACTAC GCTAGTAACT  
 481 ATCTTTCTAT ATAAGTAGAT CACTTGGGAT CCGAGGGCAG CTTGAAGCCC ACCAAATCGG  
 541 CGGTATCCCT TACGGATCTC TCGCCCTTC CGTGATATTC CTTGTAGAGC TCCAAGTACC  
 601 GGCGCTGGCT GGCTAGGTAG GTCAGGTAGG TTTGACCCAG GAAAGTCGCT TCGTTGCGCG  
 661 CTTGCGAGAA TTGTTGTTCC GTGGTGGCGA ACTTCTTGTA TTGCGCCAAA ATGTAGCGCG  
 721 CGGCCAGAGA GTCCTTGATG CAGCCATTTG GAGATGCCTG GCGCAATTCG TGCAGCAGGG



```

781 AGCGCAGCAC CTTGGTTCCC GCCATTCTAA ACACAAAATA TTAATTGCAT TTGCAAGAAA
841 CTATAAACAA TCAACGACTT ACGTGATTTT TAAGAAAATT CCAATTGCTT CTGCCGAACA
901 GCTGTTCTCA ACAGAGTTGC CACCTAGTCA TACAATGAAT ATACAGTGAT CACTCTCACA
961 AATTGACACT TTGAAAAATA ACACTGGATC TTATTTTTTA TAATTATCAA TAAATCTGAA
1021 AAATCATCAA AAGTTTGACT ACGAGCACAG TAAAACCTCTG TGACAAACGA AATATTTAAA
1081 ATTTATTTAT TTTAATTATA TTATATTCTC ACTTTTGGAA TCGTTTTGCT ATAAATGTCT
1141 AAAAGTCGAA CGGTCTGATT GGAAAACAAG AACAACCAAT AAGTAAAGTA CACAATCCAA
1201 CTGGACTGTC AAATAAAAAA TACAAACAGT AAATCCAGTT GGAAAAAACC AATTTATTTT
1261 AAAAGTTATT TAGCAGTACA CCGAACTCGT TGCCTGGGCT GTTTA

```

//

```

LOCUS          4      1366 bp      DNA      linear PLN 25-FEB-2004
ACCESSION      4
VERSION        GeneMark.hmm v3.0 self_training
ORGANISM       D.melanogaster
FEATURES       CHR ---
CDS            join(500..614,670..866)
               /translation="MNDIKRLKDQQREKHPGFDGYMDCMTRSLFTGLATFCLSFSGT
               YFAQKIVQSKIRYPIKYNILISLVATGVSYQITSTRTKACQAAWMAFEDKHSVLKE
               KTF"

```

```

ORIGIN
1 AAAATATCAC TAGATCGGTT TGTTCTGCTG TGTTACCTG CTA CTACTGGTTG TGTGGCCGCT
61 TCATCGCGTC CTGCCACTCG ATATCCACTC CTTTTTGCGA GCCTTTAATT GTTATTTTTTC
121 AGCGTGAAGA CGCCGCAATT CCAACTTGGG TATACTAAAT TCGTAAGGGT TGCCAGGCCA
181 CCGGACGAGC TGTTATCGGT GGCTTGACTC ATGCGATAGT ATCGAACCGA GGCGGTTGAA
241 ATCAAATTGT TCAATATGCG CACTATCATA TTACTTATAT GAAATACTAA GTAAAGAAAG
301 TTAATATTAT ATAAGCATT C TCTCCTTAAT CGTATTTTCT TTATTACAAA CTGTAACGTG
361 AATAATTTTA AAACATAAGA TATTTCCCTA TCGATACTAT TTGTAATCGC TTAGCCACCT
421 CTGGGACAAA CAGCTGATTT CGCGCACCGG CTAAAAGCCA ATGAAAATAA ACGCTTAATT
481 AGTTCACCGG CCGTTTATTA TGAACGATAT TAAGCGATTG AAGGATCAGC AGCGCGAGAA
541 GCATCCCGGG TTCGATGGTT ACATGGACTG CATGACCCGC TCCCTTTTCA CGGGGCTCGC
601 CACATTTTGT TTAAGTGCGT AATTAGCTTC AGTTTTTTCGA TAATTGCATA ATAATTGCTC
661 AAATAACAGG TTTTTCGGC ACCTATTTTCG CCCAGAAGAT AGTACAATCA AAAATTGCTC
721 ACCCAATCAA GTACAACATA CTTATCTCCT CACTGGTGGC CACCGGCGTG TCCTACCAA
781 TCACATCGAC ACGGACTAAA GCCTGCCAAG CGGCGTGGAT GGCCTTTGAG GACAAGCATT
841 CGGTGCTCAA AGAGAAAACC TTTTAACACC TTCAAAATTC CATTTAGCTT TAGTCATGTC
901 TGCTCTACGA ATATTGGCCC GATTTGTCAG CACTAGGACT CTGCGAATTC GTCCGATTCT
961 GGAGATTCCC GCACGCTGCA AGTACACCCA ACATCAAGGA GTTAAGGGCA TTCGGAACAG
1021 GAAGAGCTTC TTCGAAGCCC AAATTCAGGC AGGTCAACAA GGTGAGGAGG ATGCGGACTT
1081 AGAGCGGACA GCCAATAGCG ATCTGGCGGA TATGCGGTTT TTGGATGATC GGTAGGCTTA
1141 AAAATCAAAG AAAAAAAAAG AGATATTACT AACCTTTTAT TTAAGAGCCT ACGACGAGGT
1201 GGCTGGAGGA GCCATGAGAA TCACACGTGA CATAGCCAGC TCTCAGCAGG TGCTCATCCT
1261 CCAACCGTAT GTAAAATGGG CAGCCAAACG ACAGAACGCA CCCGTCGATG TTCGGCCCCG
1321 GGATCAACTC GCGGAGGCCA CAGCGCTGAT CCACTCCCTG CCCAAT

```

//

```

LOCUS          5      1388 bp      DNA      linear PLN 25-FEB-2004
ACCESSION      5
VERSION        GeneMark.hmm v3.0 self_training
ORGANISM       D.melanogaster
FEATURES       CHR ---
CDS            complement(join(500..793,847..888))
               /translation="MFDTREETSWN SDEGTPQFITISLEEPQKVAGFSFQFQGGFSG
               QKSELIMYSADGAQVHQEPFYPEDINSPQLFQIAESVRENPCSKLKFVFESSTDLFG
               RIIVYDLQLFG"

```

ORIGIN

```

1   ATAAATGAAG CATTCTGAATC ATAAAGCTAT GCCTAAATTA TCTGTGCGGT TTTGGACAAA
61  TAAACAATGG TTTTGGTGCA ATATACATAA ATGACGAAAT TTCAATTGGA ATGGGCTAAG
121 CTGATTGATG ACGCTTCTAT ATGGGGTGAT AAGACATGGA CTAGAGTGTC ACCTTCGCTA
181 TGAAGTTGCG TGTTTTTCGA GCCAGCTCCA TGCAAATGAT ATTCAAATTG GGAATCGCG
241 TGGAAATATT TTCATTGAAC CTTGATCCAC ACTCGTAAGC ACTTAAAGGG CTTACCTAGT
301 TTGAAATATT TATATGAAAT TAGTCGCATA TCAATTTTCT CAGTGGCAGG CTGAATCAGC
361 ACAATTATTG CTGATAACCA TGACCATCCT ATTACGGACC AATGTTTTTTG ATAATACCAC
421 AATAGATAAT GATCCGATTT TATACACTTT GATTAGAGAA GATTTTGTAC ACATTTAGTA
481 AGATCTATTG GGTCTAGAGC TAGCCGAACA GCTGGAGATC GTAAACAATG ATTCTACCAA
541 ATAGATCGGT GCTGGACTCG AAGACGAACT TTAGCTTTGA GCAGGGGTTT TCCCGGACTG
601 ATTCCGCAAT CTGAAAAAGC TGTGGGGAGT TGATATCTTC TGGGTAGAAT GGCTCTTGGT
661 GAACTTGGGC TCCGTCAGCG GAGTACATGA TCAGTTCGGA TTTTGGCCA GAGAATCCGC
721 CTTGGAAGT GAAACTAAAT CCAGCTACTT TCTGTGGCTC CTCCAAGCTA ATGGTAATGA
781 ATTGGGGGGT TCCCTGAAAT GGCCGTTTGG AGTTATATTC TTTTTTCCA AATCTTAGGA
841 TGATACCTCA TCTGAATTCC AAGAAGTTTC TTCCCGCGTA TCAAACATGA ATTGCTTTCC
901 GTGCTGCTTC ACATCTCTGT TTAACCCTGA GCTCACCTG CAAACTATAC GTTAACTAAA
961 GGGAGTTACA AAATAAAACC CAGAGTACCT GCAGCTGTAT TTTACTTTTG TCAAATATT
1021 CATAATTCAA TAAAAATAAG AAATAAACAA ATCGGAGACC GCGAGTTAA AGGCATTAGA
1081 GATGGGCAAC AATCAGAAAT CCATAGAATT TTTTTTGTG CGGATTTTTA ACACCCGATT
1141 TAAGAAATTG CTTTAAAAAA TATATTTTCC CTAACTTTCT AAAATATGCA TGATTCTTAT
1201 TAGATTTTTG AAATAAATAC GTCAGATAAA GATATATCGA TATTATAGAT GCTATACCAA
1261 GTATTGATTT TGCAGCCCTC GTCGAAAAAG CAAAACAGCT GGCAGTTTAA ACATTTTCAT
1321 TTTTTTGTG GACTTATCTT AGAAGTTGAG ATGATAAAAG CCATTCTCGT TTTTAAACAAT
1381 CACGGGAA

```

//

```

LOCUS           6       2736 bp       DNA       linear PLN 25-FEB-2004
ACCESSION      6
VERSION        GeneMark.hmm v3.0 self_training
ORGANISM       D.melanogaster
FEATURES
  CDS           join(500..581,1714..1817,2039..2236)
               /translation="MPYIIIIRGNLASYSHKYPWRVLSGLKADDIEQLNKFSCGGYS
               DESTIVYLVHPCRILSALEILGFRVVASSTAVKQDYNEYMWTMRKEFDEPEPLEAE
               SVVRENLSNIGREAASLGNHYHKVDSPE"

```

ORIGIN

```

1   GAAAGAATGT CCAGTAATAT CTGTTTCTAG AATGTCCCCT GAACCATATA GCCATCTAGG
61  TATATGTTCC GCCTTGGCCA CTGGGTTGGG TCATATCGTA CATATATCGG TCGAGTGATT
121 ATCCTGGCCA GAGTGCCTCA CTTTGTCTAT TGGGTATCTG CCACCTTACG CCGCAGGCTA
181 ATCCAATAAA AAAAATAGCT GCTAACCATC TCAGAGAGCA GCGCTGCGCG ACGCCCAAAA
241 GCGAAATAAA AATACGAAAC CAAACCAAAC AAAATAGCCA AAGCAGTAGA GCTGAGCTAG
301 CGCTGGGAAA ACCTCTTGGT CAACAACGTG TTACCCGATT TCGGTTTCAG TCGAGAGTCA
361 GCCTTCAGCA GAGCGCCACA GCGAGCATTG GCTGCCTCAC GGTTTCGTAT CTCATTTGGT
421 TTTCACTTAC GTTTCACGGC TTTTCGTTGG ACGCCCGCGC TAATTAATCC GCAGATATAT
481 TCAGCAGTAA TCGGGCCAAA TGCCGTACAT AATCATACGG GGAATCTAG CCTCCTACAG
541 CCACAAATAT CCATGGAGGG TGCTCGTCTC CGGGTTGAAA GGTAAAGCCT GAACCGCGTA
601 GATACAGTAT CTCTTTTTTT TTTGGTTTCG TTTTCGTTTT ATTTGTAGTG TGTTTACCAT
661 TGCGACACAC ACAATTCATT TCGAGAGCTT GGCAAACAGA TACGAACACA CGATAGATTT
721 CTGAACGCTC TTTTCGGTTT TTCCACTTTG CACCACAAAA AAAAAAAAAA AAAAAACAAA
781 TTTTGAATG GTTAGACAGT GGCTGTATAA ATATTATATA CATATATTAT TTTCAAACCTA
841 TTGTTTCAAT ATCTAGCATG TATTTTGCTC AAGCTTGGAA ACATGACCAA ATGCACGCCT
901 ATTTGATGTC ATAATAATAC AATGTAATGT TTTAAACTT TATCTAGTTA TATTCTTTAA
961 AATACTGAAA GCATCTTGAA AATCCAATCC TATACTTATT TTTTGACATT CAAATTCTAC
1021 TCCCATTTTG AATTGTAAAG TTACAGTAAA TCTCACTGAA ACAATAATAA AAAAAAATA
1081 AATAAAAAAA TCTACGGCAA GCTATTTTTA TTTGCTGGTT ACCCAATAAC CATTAGCGCT

```

```

1141 GTGCCGTAGT TATTTTCCTC ATAAAATCAA CAGCTGCCCT TTAATTGCAC TCCATTTGCC
1201 CCTGGAAATC CGCCTGCCCG CACCATTCCG CTTTTTTCGA CCGCCACTGT GCGAAGTTTG
1261 GTGCCCAGCAG ACGAGGTCTT CAGTTCGCCA GTTTGGGTTT GTTTTTCGCT CCGTGCAGTT
1321 CGCCTGGCAG AGCGGCCTGT CGTGCTTATA TTTGTAGATA TCTATATATA CAGCCGTACG
1381 TAGTGCCACA TATATGCACT CGATTCCGGT GCATATTTCT GGAAGTAGTA TCTGTGCGGC
1441 GCAGAAGTCA ATGCACTGGG ATCGTCTAGG GACAAAGAAA ATACGATACT CCCGAGATAC
1501 TCCCATTTTA CGTTTATTAT GAAACAGCAG TCAATATTTT TTTTCGCCATT TCGCTTAATT
1561 AGCACACTCA CATTGAAAGA CAATTGCCCT GGGCTGACGT CACTTTTCGA CACAGCCGAG
1621 TTTATCTTTT GTTTGCCTG TTTAAACATT AGCGAAAAGG AAAGCGATTT TATCAAAAGT
1681 AGCACCCATG ATAACCATTG CCCATTCTTC CAGCTGACGA CATCGAGCAG TTGAACAAGT
1741 TCTCCTGCGG CGGCTACAGC GACGAGTCCA CCATCGTCTA CTTAGTGCAT CCTTGTGCGG
1801 TTTTATCGGC GCTAGAAGTG AGTACACCTT CCAGATCCCA TACCGACCTA CTCAGAATGA
1861 TATTTTCTTA TAGACACACA TTTTCGCTATC TAATGAGACA GCAGTTATTT TATCAACTTA
1921 AACAAATTCGC CGAGCAGGCA CTGATTAATT ATTTTAGTAA AACTTTCAAC CCCACTTCCC
1981 TTCCTATTGA ACTTTCAATT ATCCAGTGAC TCATCGATTT CTGCATTTTT CTTTCTAGAT
2041 CCTGGGATTT CGCGTAGTGG CCAGCTCATC GACTGCCGTG AAGCAGGACT ACAACGAGTA
2101 CATGTGGACG ATGCGCAAGG AGTTCGACGA ACCAGAACCC TTGGAAGCCG AGTCCGTGGT
2161 GCGAGAAAAT CTATCGAATA TTGGCCGCGA GGCAGCCAGT TTAGGCAACT ATCACAAGGT
2221 GGATTCGCCT GAATAGACCC GCATCCCATC CAGTCCAAAA CAAACAAAAA AAAAAAGAGC
2281 AGCAATCAAC CAAGAACTCT ACTCTAGTTG TATAATTTAG TGTGTGTGTG TGTGAATTGT
2341 GTGCGTGTTT CGGTGTGAAA AAAGAAAAAA AAAAAATTAT AGTAACCTAG GGAATTTTGT
2401 TCCATAACAT AACTGAGCA AAGGAGGCGA CCAAGCGAGT CCCTTCAGAC GAACGAACTA
2461 TGAGTGAGGG CGCAGTCGGG CTGAAGGAAC CTCAGAATCT CAATAGCGAA GTTGTTCGA
2521 CTGTGCTGTC CGCGGCATCG GCTGCATCCT TGAACGCCGC CACCGCCAAC GTACCGGCCA
2581 ATGTGGTGAC CATACCGGTG CCCATTCTGC AGTCGGAGGG CAACTTTGCC TACGTGACCG
2641 TCAAGGGCTC GCTGCACGAT TACACCTGCA CCATTTTGGG CCTGAATCAA GCGGAAGTTC
2701 AAGCCCTGTC CAAGCGCTTC GAGAGCGGTG TTAAGG

```

//

```

LOCUS          7      1587 bp      DNA      linear PLN 25-FEB-2004
ACCESSION     7
VERSION       GeneMark.hmm v3.0 self_training
ORGANISM      D.melanogaster
FEATURES
  CDS          join(500..520,572..715,776..857,921..1087)
              /translation="MSNLRQVLSAFKKLHRTRQYVFQGDANALAAGRLKINESFLQ
              NRNESSEDEIQKMIKLAQDVDLELRNVIQAQKKEDGVYELRITPETTRLDNVVFN
              DAIIEKPRRQRGDKNTEGCCGGAAMAALAEVQARNK"

```

ORIGIN

```

  1 AACAGTCCTT CTTAGTAATG CGCTCCAGGT TACAAATTTT CTGAATTAAA GTCGCTGTGG
 61 CGCTGCACTG TCTGATTTTC CACGGTAATT GTGATTAATT TAGTTAACTT TTTGATGCCG
121 CATTGCCTTT CGACCCGTTT TGCGCTGGTC ACTAATTTTC TACTAGCATT CGAGCCGATT
181 TACGACCGAA ACGTTAAAAG ATTTCTATAA ACTGGCGTCA GATTGACCGC ATCTGCTAGA
241 GGTGGACAAT TGACGATAGG TCGATAGCTT TCGATGTATG TGCTTACGTT TAGAAAGGAA
301 AATATTGAAT CTCTAAAAAA AAAAAAATTG AATTGGAAAG AAAATACTGA ATTTAAAAAT
361 TTTATTGACC TCTATTATTA GAGAAAAAAA TATTATACCA ATGCAATATC TTCAAGTTAA
421 GAAAACGTGA ACCCTAAAAA CTATCAATTG GTTCAGACAT TCTGGCAACC TTACATCTGT
481 CAGCTGTTAC CATACAAAAA TGTCCAATTT GCGGCGCCAG GTAAATTAAC TTAAAATCAT
541 AAATAATCGG TTAATATTGT TTGTATTCCA GGTTCTCAGT GCTTTCAAGA AGCTCCACCG
601 TACACGACAA TACGTTTTTC AGGGGGATGC CAATGCTTTG GCGGCGGGAC GACTAAAAAT
661 CAACGAATCT TTCCTGCAGA ATCGTAATGA AAGCAGCGAG GATGAAATTC AAAAGGTTTA
721 ACCACTTTTT GTAAATTCTA ACTAAGTACA TATATGGCAA TTTGGCAAT TACAGATGAT
781 CAAGCTGGCG CAGGACGTGG ATTTGGAGCT GCGAACGAAT GTCATCCAAG CCCAGAAAAA
841 AGAGGATGGT GTTTATGGTC AGTGGGGCAT GCGGATTACA TAAAAGAGCG CTCAAAATTA
901 AAATTTGGCT ATATTTACAG AACTAAGGAT CACGCCAGAG ACAACGCGAC TCGACAATGT
961 GGTCTTTAAT CCTGACGCAA TTATCGAAAA ACCGCGCAGG CAACGCGGCG ACAAAAACAC

```

```

1021 TGAAGGTTGC TGCGGTGGCG CTGCGATGGC GGCCTGGAA GCCGAAGTCC AGGCCCGCAA
1081 CAAATAAAAA TATATTCAAT ATTTAGCTGT AGTCAAGATG GTTTTGTCT GATTAATTAC
1141 GTCGTTTATC TTTAATTTCT ATTATGTTTC TTCTTCGATT TGTGACTACT CTTTGACTTG
1201 GACTTCTTTT GCTTGGATTT TGTACTCTTT TTGCGTTTGC TGCGATCGTC CGACGATGAG
1261 GAGCTGCTAG AGCTGTCCTC GGAACATCTT GAAGATGTGG AGTCGCTTTC GGATTCCGAG
1321 GAACTTTTAC TCGAATCTGA ACTGCTGCTA GCTGCTCGTT TCGATTTCTT GGCTTGCTTT
1381 TTGCTCTTTT CCACTGAAAG TTTTCTTTTC TTCTCATGAC TCTTGTTAGG GCTTGAGTGA
1441 GTGTCCATTC TATGGTCTTC CCGGTTCTCT GATTGTTGCC TATAAAAAGA TAGATAGATA
1501 GTTAAAGATT TTGTATACAT CCAGATGCTT AACATTTTTA CCTCCGCTCT GGCATCTTC
1561 TTTGATTCTT GGAGGTTTCT CTATGCG

```

//

```

LOCUS      8      1544 bp      DNA      linear PLN 25-FEB-2004
ACCESSION  8
VERSION    GeneMark.hmm v3.0 self_training
ORGANISM   D.melanogaster
FEATURES   CHR ---
CDS        join(500..562,620..752,806..1044)
           /translation="MADLVSGEASESDEELQEKNKIFAAEISGEASEEDEDIYEQG
           RSSNQVNSTASIYRNLLQKLIENNIAIWRSLTAFTRSFVLSASKQLVTTDQMLIK
           SQHSLQSAHTSLQQAQKNAQDLQNRVADVITSNFLPHISIQKAT"

```

ORIGIN

```

1   ACGGTGGGTG CACTAAATAT TTTACATTAT AAAGATTAAT TATCATTGT AACCTGTGTA
61  CTGTGTAGGT TCCCCGCGTC TTTATCGATG GCAAATTCAT TGGCGGTGGC ACTGACATCA
121 AACGAATGTT CGAGACAGGA GCTCTGCAAA AATATTTCCA ATAAATAGTG TTCTTACTCT
181 GTTCAGAACT CCGTTTTATG TAAAAAGTTT GTTAATCTTC AAAGTCCTTA ATAAATGCTT
241 TTAAAATTTA TGTTTTGCGC TTATTGAGAT TACATCGTCT TCTGAGTAAT GGGCAAAGTG
301 TTAATAATAC CATTCAATAT CCGTTAATAA TTTTATGAT TGTAGTTCTA CGGACTGTGT
361 AGCATAGATA TCACAAACAT AAGAATATCC CTTCAACTG CGCCCATGTG AGCAACAGTT
421 TGCAGTTTTA ACTGATCTGG CAGCGCCGTA ACTGCAGTAA ATAAAAAATT GTTTACAATA
481 GTATTTAATA AACTGAATGA TGGCTGATTT GGTGAGCGGT GAAGCTTCTG AATCCGACGA
541 GGAGCTGCAG GAGAAGAATA AGGTTGTTGA GGATATCATT TATAAATAAC AGTCCAATAA
601 TAAAACCATT TTGTGACAGA TTTTGTCTGC TGAAATTTTC GCGAAGCCTT CCGAAGAGGA
661 TGATGAAGAC ATTTACGAGC AAGGCCGAAG CAGCAACCAG GTCAACAGCA CGGCTTCCAT
721 TTACCGGAAT AATCTGCTTC AGCGGAAACT AAGTATGTCA CCAATTCTGT GCCTTCAAAC
781 ATTTCAACTT AATGCCCTTT TCCAGTCGAA AACAACATTG CCATTTGGAG ATCCCTTACC
841 GCTTTCCTC GCAGCTTTGT GTTGAGTGCA TCAAAGCAGC TCGTAACCAC TGATCAAATG
901 CTCATCAAGT CGCAACATAG TCTTCAGTCG GCTCACACAT CCCTGCAGCA GGCCAGAAG
961 AACGCCCAGG ACCTGCAAAA CAGGGTGGCT GATGTTATTA CCAGCAACTT CCTCCGCAC
1021 ATAAGCATCC AGAAGGCAAC CTGACTTAGA CGTATAGTGT ATTTGCTGAT AAACGATCAA
1081 ATCTAGGCTA ATCCTCTGTA TCGGAATTGG GCGCATAGAC CTGAGTGTTG GGTGAGGGCT
1141 CCCGCGGCAC GTAGGTCCTC TGAAAGCAAC GTGAGAAGAT GGTTTCGCACC TTGTTAGGGC
1201 GCTCAGGTGA CTGGGGTATA GTTTCGTCTT CGTCGGAGGA GCTTTTCGCA GGTTTAGGTT
1261 GTTGAGAGTC GTCTGTGTTG ATAAAGCAAA CCTCCGTGCT GTTCGGCGGC TCTGGAGCAG
1321 GTGCCATGCT GGCCTCCAAA GCGGCATCCG CGGCTGCCAG CATGAGAGCC TCTTGTTCCG
1381 CCTCATCTTC AATCAGAACC ACAGTGTCCA CCTCGGCTAG GATGCGAGGG TGCTGAACAG
1441 ATGGCGCCTC CGAGTCCCGG AACTGAAACA GTGGATTATC TAGGCTCGAT TCTAATTGGG
1501 TCTCCTCAAC TCGCCGTTTT GGCTGCACTG CAGCCGGTTC CGAA

```

//
